# Supplementary material for: Histone deacetylase knockouts modify transcription, CAG instability and nuclear pathology in Huntington disease mice
Source: eLife. 2020 Sep 29;9:e55911. doi: 10.7554/eLife.55911 (PMC7581428; doi:10.7554/eLife.55911)
Supplement: Figure 1—figure supplement 2—source data 1. [file elife-55911-fig1-figsupp2-data1.xlsx]

## Sheet: Sheet1
Figure 1- figure supplement 2, panel B					Figure 1- figure supplement 2, panel B
5 month Hdac2 KO					5 month Hdac2 KO
HDAC2 (normalized by total protein)					HDAC1 (normalized by total protein)
Htt+/+ Hdac2 WT	HttQ111/+ Hdac2 WT	Htt+/+ Hdac2 KO	HttQ111/+ Hdac2 KO		Htt+/+ Hdac2 WT	HttQ111/+ Hdac2 WT	Htt+/+ Hdac2 KO	HttQ111/+ Hdac2 KO
0.127985	0.270823	0.0169463	0.00830364		0.053313	0.0620338	0.259252	0.182395
0.186198	0.186226	0.00894494	0.0118995		0.0997766	0.0632183	0.202016	0.183045
0.291683	0.23389	0.0182959	0.00766487		0.0518258	0.0471392	0.174107	0.197385
0.269798	0.273937	0.00996521	0.0180774		0.0522899	0.0578164	0.206916	0.147304
