# Supplementary material for: Histone deacetylase knockouts modify transcription, CAG instability and nuclear pathology in Huntington disease mice
Source: eLife. 2020 Sep 29;9:e55911. doi: 10.7554/eLife.55911 (PMC7581428; doi:10.7554/eLife.55911)
Supplement: Figure 6—figure supplement 1—source data 1. [file elife-55911-fig6-figsupp1-data1.xlsx]

## Sheet: Sheet1
Figure 6- figure supplement 1, panel B			Figure 6- figure supplement 1, panel C
5 month Cre-only expressing mice			5 month Cre-only expressing mice
Expansion index			Mean integrated intensity
D9-Cre-	D9-Cre+		D9-Cre-	D9-Cre+
11.1443	10.0114		247.138	178.872
9.33289	10.9459		155.783	213.527
9.87406	9.89511		61.3376	92.2585
