# Supplementary material for: Histone deacetylase knockouts modify transcription, CAG instability and nuclear pathology in Huntington disease mice
Source: eLife. 2020 Sep 29;9:e55911. doi: 10.7554/eLife.55911 (PMC7581428; doi:10.7554/eLife.55911)
Supplement: Figure 6—figure supplement 2—source data 1. [file elife-55911-fig6-figsupp2-data1.xlsx]

## Sheet: Sheet1
Figure 6- figure supplement 2, panel A			Figure 6- figure supplement 2, panel A			Figure 6- figure supplement 2, panel B					Figure 6- figure supplement 2, panel B					Figure 6- figure supplement 2, panel C					Figure 6- figure supplement 2, panel C					Figure 6- figure supplement 2, panel D					Figure 6- figure supplement 2, panel D
2.5 month Hdac2 KO			2.5 month Hdac2 KO			5 month Hdac2 KO					5 month Hdac2 KO					5 month Hdac3 KO					5 month Hdac3 KO					5 month Cre-only expressing mice					5 month Cre-only expressing mice
Number of D32-positive cells			Mean integrated intensity			Number of D32-positive cells					Mean integrated intensity					Number of D32-positive cells					Mean integrated intensity					Number of D32-positive cells					Mean integrated intensity
HttQ111/+ Hdac2 WT	HttQ111/+ Hdac2 KO		HttQ111/+ Hdac2 WT	HttQ111/+ Hdac2 KO		Htt+/+ Hdac2 WT	HttQ111/+ Hdac2 WT	Htt+/+ Hdac2 KO	HttQ111/+ Hdac2 KO		Htt+/+ Hdac2 WT	HttQ111/+ Hdac2 WT	Htt+/+ Hdac2 KO	HttQ111/+ Hdac2 KO		Htt+/+ Hdac3 WT	HttQ111/+ Hdac3 WT	Htt+/+ Hdac3 KO	HttQ111/+ Hdac3 KO		Htt+/+ Hdac3 WT	HttQ111/+ Hdac3 WT	Htt+/+ Hdac3 KO	HttQ111/+ Hdac3 KO		Htt+/+ D9-Cre-	HttQ111/+ D9-Cre-	Htt+/+ D9-Cre+	HttQ111/+ D9-Cre+		Htt+/+ D9-Cre-	HttQ111/+ D9-Cre-	Htt+/+ D9-Cre+	HttQ111/+ D9-Cre+
56.75	46.75		1007.38	870.053		36.5	35.25	54.25	46.25		445.698	315.887	417.414	316.711		60	65.5	63.75	66.25		242.247	221.663	248.183	263.382		38.5	52	33.5	57.5		174.562	181.237	265.248	208.48
35.25	35.75		800.901	713.822		40.5	34.25	42.75	46.25		292.012	274.41	557.293	348.656		72.5	60.75	76.25	65.75		148.196	239.348	380.909	315.813		36.5	50.25	26.25	47.75		178.32	174.392	234.417	198.523
51.5	43		1343.2	833.39		37	42.5	53.75	46		341.205	293.835	465.606	390.705		59	43.5	54.75	59.5		420.604	182.496	297.933	248.601		38.25	54.5	32.75	53		205.134	145.737	268.34	154.975
33.75			542.069			46.75	40.25	43	49.25		316.719	294.97	493.302	328.982		51.25					263.907					42.25		59.25			218.759		311.938
42.5			531.74			44.75	45.5	43.5	45.25		318.412	268.556	448.776	331.025												57.25		55.75			195.103		215.985
47.25			697.119					38.75					380.052
44			521.832					43.5					451.81
								44					669.689
								50					528.43
