# Supplementary material for: Histone deacetylase knockouts modify transcription, CAG instability and nuclear pathology in Huntington disease mice
Source: eLife. 2020 Sep 29;9:e55911. doi: 10.7554/eLife.55911 (PMC7581428; doi:10.7554/eLife.55911)
Supplement: Figure 6—figure supplement 3—source data 1. [file elife-55911-fig6-figsupp3-data1.xlsx]

## Sheet: Sheet1
Figure 6- figure supplement 3, panel D			Figure 6- figure supplement 3, panel D
5 month Hdac2 KO			5 month Hdac2 KO
MSH3 (normalized by total protein)			MSH3 (normalized by total protein)
Htt+/+ Hdac2 WT	Htt+/+ Hdac2 KO		HttQ111/+ Hdac2 WT	HttQ111/+ Hdac2 KO
0.445565	0.431699		0.382518	0.430067
0.414492	0.437475		0.464071	0.433553
0.417332	0.425604		0.443668	0.403231
0.382198	0.428835		0.433866	0.395936
