# Supplementary material for: Histone deacetylase knockouts modify transcription, CAG instability and nuclear pathology in Huntington disease mice
Source: eLife. 2020 Sep 29;9:e55911. doi: 10.7554/eLife.55911 (PMC7581428; doi:10.7554/eLife.55911)
Supplement: Figure 6—source data 1. [file elife-55911-fig6-data1.xlsx]

## Sheet: Sheet1
Figure 6C			Figure 6C			Figure 6C			Figure 6C
2.5 month Hdac2 KO			5 month Hdac2 KO			10 month Hdac2 KO			5 month Hdac3 KO
Expansion index			Expansion index			Expansion index			Expansion index
Hdac2 WT	Hdac2 KO		Hdac2 WT	Hdac2 KO		Hdac2 WT	Hdac2 KO		Hdac3 WT	Hdac3 KO
4.35911	4.61311		15.646	11.641		23.1915	17.0951		15.325	11.531
5.79772	5.39129		15.018	15.071		19.2153	21.8722		14.581	10.488
6.66089	4.98333		14.967	12.981		23.9609	18.821		14.29	9.271
5.55683	6.17038		16.381	11.974		21.9252	22.9038		13.663
6.41847			14.087	11.774		21.0349	19.3899		13.65
						19.95			12.157
