# Supplementary material for: Histone deacetylase knockouts modify transcription, CAG instability and nuclear pathology in Huntington disease mice
Source: eLife. 2020 Sep 29;9:e55911. doi: 10.7554/eLife.55911 (PMC7581428; doi:10.7554/eLife.55911)
Supplement: Figure 8—figure supplement 1—source data 1. [file elife-55911-fig8-figsupp1-data1.xlsx]

## Sheet: Sheet1
Figure 8- figure supplement 1, panel C					Figure 8- figure supplement 1, panel D
5 month Hdac2 KO					5 month Hdac2 KO
WT HTT (normalized by total protein)					Mutant HTT (normalized by total protein)
Htt+/+ Hdac2 KO	Htt+/+ Hdac2 KO	HttQ111/+ Hdac2 WT	HttQ111/+ Hdac2 KO		HttQ111/+ Hdac2 WT	HttQ111/+ Hdac2 KO
0.703253	0.631124	0.476159	0.389134		0.248155	0.145818
0.676263	0.705922	0.35083	0.554832		0.184314	0.201454
0.831725	0.956753	0.887443	0.711328		0.33516	0.48007
0.456147	0.960457	0.660549	0.680432		0.299932	0.30403
