# Supplementary material for: Histone deacetylase knockouts modify transcription, CAG instability and nuclear pathology in Huntington disease mice
Source: eLife. 2020 Sep 29;9:e55911. doi: 10.7554/eLife.55911 (PMC7581428; doi:10.7554/eLife.55911)
Supplement: Figure 8—source data 1. [file elife-55911-fig8-data1.xlsx]

## Sheet: Sheet1
Figure 8B			Figure 8B			Figure 8B			Figure 8C
2.5 month Hdac2 KO			5 month Hdac2 KO			10 month Hdac2 KO			5 month Hdac3 KO
Mean integrated intensity			Mean integrated intensity			% of nuclei with HTT inclusions			Mean integrated intensity
Hdac2 WT	Hdac2 KO		Hdac2 WT	Hdac2 KO		Hdac2 WT	Hdac2 KO		Hdac3 WT	Hdac3 KO
153.21	69.6743		248.381	139.181		14.944865 (low CAG)	0 (low CAG)		245.285	137.056
201.14	137.974		236.132	167.135		7.47965368 (low CAG)	1.3215859 (low CAG)		222.79	224.222
159.54	81.4025		154.107	124.952		3.85078513 (low CAG)	26.4327485 (high CAG)			182.363
			297.364	79.9786		42.2076955 (high CAG)	20.9815547 (high CAG)
			198.141	93.2889		41.0218579 (high CAG)	22.9156779 (high CAG)
						30.1381939 (hgh CAG)
