# Supplementary material for: Histone deacetylase knockouts modify transcription, CAG instability and nuclear pathology in Huntington disease mice
Source: eLife. 2020 Sep 29;9:e55911. doi: 10.7554/eLife.55911 (PMC7581428; doi:10.7554/eLife.55911)
Supplement: Source data 2. [file elife-55911-data2.xlsx]

## Sheet: combined_5 contrasts
Differential gene expression analyses in each of five contrasts
	HttQ111/+ vs Htt+/+ in Hdac2 WT (contrast 3)				Hdac2 KO vs Hdac2 WT in HttQ111/+ (contrast 2)				Hdac2 KO vs Hdac2 WT in Htt+/+ (contrast 1)				HttQ111/+ vs Htt+/+ in Hdac2 KO (contrast 4)				HttQ111/+ Hdac2 KO vs Htt+/+ Hdac2 WT (contrast 5)
Gene	logCPM	log2FC	P value	FDR	logCPM	log2FC	P value	FDR	logCPM	log2FC	P value	FDR	logCPM	log2FC	P value	FDR	logCPM	log2FC	P value	FDR
Xkr4|ENSMUSG00000051951	4.93098	-0.0127241	0.839572	0.994968	4.93082	-0.14629	0.0165877	0.107779	4.93102	-0.0908402	0.184463	0.469148	4.93104	-0.0736171	0.147624	0.999801	4.93096	-0.16391	0.0132315	0.0744008
Sox17|ENSMUSG00000025902	2.16264	-0.00433381	0.974328	0.999487	2.1627	-0.0660338	0.598918	0.833313	2.16262	-0.0302297	0.831894	0.942655	2.16262	-0.0404833	0.698887	0.999801	2.16259	-0.0801059	0.548599	0.776753
Gm6085|ENSMUSG00000098104	2.93648	0.128148	0.175551	0.878634	2.93642	-0.0324678	0.713663	0.893444	2.93649	-0.0276658	0.782829	0.921387	2.93649	0.119186	0.113614	0.999801	2.93648	0.0936128	0.319698	0.591377
Mrpl15|ENSMUSG00000033845	4.73394	0.00382162	0.951957	0.999369	4.73382	0.0172444	0.771113	0.915784	4.73396	0.00900857	0.893503	0.965346	4.73396	0.00995891	0.843174	0.999801	4.73389	0.0131502	0.834177	0.933486
Lypla1|ENSMUSG00000025903	4.89931	-0.00895343	0.883618	0.996828	4.89924	-0.00333052	0.953262	0.98565	4.89932	0.0558533	0.392368	0.692729	4.89933	-0.0734104	0.128369	0.999801	4.89933	-0.0185595	0.759864	0.89741
Tcea1|ENSMUSG00000033813	5.30531	-0.0351111	0.525604	0.984789	5.30524	0.0195	0.704606	0.889236	5.30532	-0.0144791	0.80481	0.930302	5.30532	-0.00666435	0.87855	0.999801	5.30533	-0.0218001	0.690317	0.86411
Gm6104|ENSMUSG00000062588	3.02156	-0.196566	0.0341589	0.597761	3.02156	0.211793	0.0141429	0.0960475	3.02155	0.132176	0.18075	0.464703	3.02155	-0.126117	0.0861968	0.999801	3.0215	0.0132898	0.884386	0.954084
Gm17101|ENSMUSG00000091665	-1.39401	-0.313009	0.392435	0.972161	-1.394	0.143489	0.678755	0.874706	-1.39403	-0.0546856	0.884167	0.961261	-1.39404	-0.1217	0.650385	0.999801	-1.39401	-0.175059	0.625021	0.826112
Rgs20|ENSMUSG00000002459	6.29579	-0.0886496	0.133572	0.854025	6.29577	-0.0907013	0.105831	0.353283	6.2958	-0.202126	0.00206926	0.0215898	6.29581	0.0193139	0.676788	0.999801	6.29592	-0.191113	0.00254992	0.0209963
Atp6v1h|ENSMUSG00000033793	7.36799	-0.061684	0.169274	0.87426	7.36788	-0.0352791	0.399256	0.703748	7.36801	-0.0819404	0.0859716	0.303934	7.36803	-0.0197595	0.577775	0.999801	7.36804	-0.105354	0.0185312	0.0951269
Oprk1|ENSMUSG00000025905	3.89166	0.137261	0.129232	0.848756	3.89131	-0.558749	1.86991e-07	1.36663e-05	3.89174	-0.357338	0.000613361	0.00844024	3.89179	-0.0703374	0.333202	0.999801	3.89146	-0.418823	4.49118e-05	0.000818108
Npbwr1|ENSMUSG00000033774	-0.197675	0.234101	0.331676	0.964145	-0.198046	-0.968846	0.000171028	0.00346802	-0.197577	-0.607159	0.0249508	0.135529	-0.197532	-0.139567	0.497531	0.999801	-0.19766	-0.726411	0.00494166	0.0353442
Rb1cc1|ENSMUSG00000025907	6.88035	-0.0117146	0.796021	0.994794	6.88023	-0.0144032	0.735146	0.902472	6.88038	-0.0570664	0.234313	0.536766	6.8804	0.0273682	0.445551	0.999801	6.88037	-0.031201	0.488523	0.736058
4732440D04Rik|ENSMUSG00000090031	-1.31964	0.53825	0.120359	0.84181	-1.3197	-0.563893	0.0729496	0.28225	-1.31963	-0.124653	0.727217	0.896896	-1.31963	0.0919241	0.724453	0.999801	-1.31961	-0.0398364	0.906955	0.964326
St18|ENSMUSG00000033740	4.20326	-0.0208578	0.773064	0.99203	4.20313	0.0495422	0.467751	0.753412	4.20327	0.0390077	0.609604	0.83499	4.20327	-0.017091	0.760812	0.999801	4.20325	0.0265088	0.713805	0.875245
Pcmtd1|ENSMUSG00000051285	7.62201	-0.0702763	0.117081	0.837616	7.6219	-0.204797	8.53044e-07	4.61307e-05	7.62205	-0.261491	6.54668e-08	4.77267e-06	7.62209	-0.0203004	0.565556	0.999801	7.62209	-0.278403	3.1165e-09	3.0269e-07
Gm9826|ENSMUSG00000048538	1.6683	-0.0750433	0.577222	0.985311	1.66829	-0.0145709	0.907073	0.968777	1.66831	0.0155166	0.914585	0.972638	1.66831	-0.113062	0.289807	0.999801	1.6683	-0.0950509	0.481105	0.730244
Gm26901|ENSMUSG00000097797	-0.0563934	0.0998951	0.663021	0.991393	-0.0564267	-0.151271	0.473854	0.757769	-0.05643	-0.141697	0.560934	0.807963	-0.0564509	0.0769516	0.666875	0.999801	-0.0565671	-0.0531976	0.812394	0.922974
Gm16284|ENSMUSG00000086235	0.0168789	-0.0917739	0.657316	0.991393	0.0170075	0.220427	0.259045	0.572629	0.0168511	-0.0520434	0.810686	0.932563	0.0168378	0.183406	0.263873	0.999801	0.016941	0.140294	0.490031	0.7374
Sntg1|ENSMUSG00000025909	4.4596	-0.0832782	0.217224	0.910729	4.45958	0.0267766	0.671848	0.871654	4.45961	-0.036716	0.608564	0.834541	4.45962	-0.0252951	0.637495	0.999801	4.45967	-0.0586427	0.381583	0.650846
Rrs1|ENSMUSG00000061024	4.17421	0.0233841	0.743877	0.991393	4.17419	-0.0308131	0.648151	0.859484	4.17422	-0.00823385	0.914048	0.972638	4.17423	-0.00160861	0.977659	0.999801	4.17427	-0.0099676	0.889254	0.95631
Adhfe1|ENSMUSG00000025911	4.53252	-0.0228568	0.750749	0.991393	4.53247	0.00128935	0.984444	0.99577	4.5325	-0.0602452	0.430434	0.724025	4.5325	0.0365928	0.518771	0.999801	4.53249	-0.0254989	0.718847	0.877644
3110035E14Rik|ENSMUSG00000067879	5.06753	-0.135337	0.198729	0.896792	5.06734	0.0149136	0.878527	0.958596	5.06768	-0.0778794	0.486413	0.761791	5.06774	-0.0540985	0.519349	0.999801	5.06822	-0.128434	0.222341	0.486221
2610203C22Rik|ENSMUSG00000079671	-0.493501	0.12499	0.595223	0.987824	-0.493589	-0.370882	0.0960627	0.331743	-0.493501	-0.268822	0.274623	0.585398	-0.493493	0.0262248	0.891292	0.999801	-0.493546	-0.258156	0.255047	0.525527
Mybl1|ENSMUSG00000025912	1.69313	0.0350904	0.794269	0.994794	1.69301	0.0789429	0.524159	0.791145	1.69316	-0.0272217	0.849351	0.949346	1.69316	0.134329	0.204157	0.999801	1.69307	0.11795	0.374862	0.644649
Vcpip1|ENSMUSG00000045210	6.65293	0.00925468	0.838674	0.994968	6.65281	-0.0380838	0.373732	0.683584	6.65296	-0.0377209	0.436576	0.729199	6.65297	0.00453566	0.900851	0.999801	6.65293	-0.0321423	0.478181	0.72783
Sgk3|ENSMUSG00000025915	5.37269	-0.0643432	0.28874	0.943213	5.37265	-0.0998505	0.0864527	0.312266	5.37271	-0.0750466	0.242214	0.546577	5.37274	-0.0939947	0.0566667	0.996196	5.37278	-0.163897	0.00995699	0.0600158
Gm6195|ENSMUSG00000046334	0.00820682	-0.0575137	0.794466	0.994794	0.00823001	-0.053888	0.790975	0.925492	0.00820056	0.235369	0.321706	0.633576	0.00821436	-0.350485	0.0472489	0.976705	0.00825666	-0.113171	0.605582	0.814783
Mcmdc2|ENSMUSG00000046101	1.66363	0.139156	0.314827	0.952987	1.66363	-0.106155	0.405791	0.708633	1.66363	-0.0139973	0.922927	0.97637	1.66363	0.0363586	0.731001	0.999801	1.6637	0.0324656	0.810178	0.922167
Snhg6|ENSMUSG00000098234	3.55461	-0.0562247	0.496679	0.982515	3.55464	0.0814189	0.288906	0.60397	3.55458	0.0555185	0.526975	0.787926	3.55457	-0.0354462	0.581877	0.999801	3.55458	0.0248546	0.764114	0.899965
Gm10567|ENSMUSG00000073738	-1.79685	-0.018972	0.961516	0.999487	-1.79689	0.488756	0.165445	0.451655	-1.79688	0.631164	0.125956	0.378311	-1.79689	-0.173154	0.546232	0.999801	-1.79701	0.46101	0.228803	0.494345
Tcf24|ENSMUSG00000099032	-1.4425	0.110195	0.755657	0.991393	-1.44253	0.60221	0.0592645	0.247476	-1.44251	0.646373	0.0927969	0.318023	-1.44253	0.0552506	0.835019	0.999801	-1.44265	0.703729	0.0479487	0.187653
Ppp1r42|ENSMUSG00000025916	-0.493835	-0.190349	0.438059	0.977718	-0.493793	0.368213	0.10196	0.344176	-0.493842	0.0166439	0.947812	0.983455	-0.493837	0.154728	0.405778	0.999801	-0.49384	0.163482	0.489438	0.737003
Cops5|ENSMUSG00000025917	5.94707	0.0105799	0.829934	0.994968	5.94697	0.00193433	0.966389	0.99067	5.94708	0.0184756	0.724382	0.895765	5.94708	-0.00962062	0.804048	0.999801	5.94705	0.00698637	0.886957	0.955365
Cspp1|ENSMUSG00000056763	4.8654	-0.0335734	0.599716	0.987824	4.86544	0.0485636	0.422433	0.722187	4.86539	-0.0167587	0.804584	0.930103	4.8654	0.0301142	0.553112	0.999801	4.86543	0.0112148	0.858289	0.943268
Arfgef1|ENSMUSG00000067851	7.12786	0.0416315	0.351799	0.970269	7.1278	-0.0146201	0.727617	0.898923	7.12788	0.0101379	0.831102	0.942421	7.12788	0.0135321	0.703074	0.999801	7.12788	0.0226671	0.610881	0.818241
Prex2|ENSMUSG00000048960	7.2336	-0.0293878	0.649023	0.991393	7.23361	-0.044246	0.460646	0.747964	7.2336	-0.0989517	0.148854	0.41854	7.23361	0.0208524	0.677526	0.999801	7.23365	-0.0813725	0.20588	0.466335
A830018L16Rik|ENSMUSG00000057715	6.25207	0.0273157	0.563877	0.984789	6.25198	-0.0311457	0.482113	0.763066	6.25209	0.112003	0.0266328	0.142206	6.2521	-0.122343	0.00112393	0.273245	6.25209	-0.00985965	0.834349	0.933584
A830018L16Rik|ENSMUSG00000095719	2.79543	0.119678	0.224696	0.91552	2.79526	-0.152299	0.0961557	0.331954	2.79547	0.0785195	0.45392	0.73992	2.7955	-0.116365	0.141076	0.999801	2.79547	-0.0423564	0.665244	0.851259
Sulf1|ENSMUSG00000016918	3.5127	0.0239216	0.844675	0.994968	3.51237	-0.0547094	0.632063	0.850626	3.51276	0.0811334	0.534108	0.792686	3.51276	-0.121822	0.209616	0.999801	3.51257	-0.0277345	0.822944	0.927562
Slco5a1|ENSMUSG00000025938	4.04608	0.0488022	0.727953	0.991393	4.04614	0.404728	0.00350123	0.035498	4.04601	0.576058	0.000411896	0.00617419	4.04597	-0.134696	0.20064	0.999801	4.04588	0.441689	0.00328601	0.0254744
Ncoa2|ENSMUSG00000005886	7.12519	0.0418003	0.350407	0.970269	7.12514	-0.0671922	0.108816	0.359089	7.12521	-0.00162464	0.972722	0.990942	7.12522	-0.0276679	0.434783	0.999801	7.12522	-0.0313025	0.482264	0.73147
Tram1|ENSMUSG00000025935	4.39157	0.0231788	0.737398	0.991393	4.39147	0.10753	0.0984625	0.336953	4.39156	0.0872375	0.232152	0.534933	4.39155	0.0413694	0.448008	0.999801	4.39149	0.123703	0.0709205	0.2429
Lactb2|ENSMUSG00000025937	4.43919	0.0881704	0.19789	0.896661	4.43921	0.100044	0.116442	0.372907	4.43917	0.202009	0.00550782	0.0451699	4.43917	-0.0184385	0.731779	0.999801	4.43916	0.182836	0.00722638	0.0471121
Eya1|ENSMUSG00000025932	3.38643	0.139067	0.225693	0.916572	3.38612	0.0354526	0.737006	0.902559	3.38646	-0.00669295	0.955454	0.985205	3.38647	0.176813	0.0549775	0.996196	3.38623	0.170028	0.141345	0.37583
Msc|ENSMUSG00000025930	-1.65793	1.04579	0.00670627	0.313185	-1.65802	0.724077	0.0161402	0.105804	-1.65797	1.52738	0.000221706	0.00377938	-1.65802	0.23646	0.315094	0.999801	-1.65822	1.74873	1.49391e-05	0.000334691
Rpl5-ps1|ENSMUSG00000082193	1.48583	0.0216564	0.878488	0.996828	1.48583	0.0314375	0.812229	0.933807	1.48583	0.0494042	0.742292	0.903394	1.48582	-0.00214177	0.984652	0.999801	1.48581	0.0549343	0.697955	0.86848
Gm10566|ENSMUSG00000073737	-2.1796	-0.330024	0.39151	0.972161	-2.17984	-0.00489317	0.988387	0.996682	NA	NA	NA	NA	NA	NA	NA	NA	NA	NA	NA	NA
Kcnb2|ENSMUSG00000092083	2.38757	0.101183	0.356033	0.970269	2.38767	-0.0726653	0.478514	0.760759	2.38758	0.151972	0.194198	0.483646	2.3876	-0.128106	0.13997	0.999801	2.3877	0.0251717	0.818803	0.925662
Kcnb2|ENSMUSG00000090498	2.46519	0.0841581	0.458842	0.978767	2.46517	-0.0986305	0.351107	0.663176	2.4652	-0.00985821	0.93497	0.980648	2.4652	-0.0133671	0.880485	0.999801	2.46528	-0.0215683	0.848117	0.939784
Terf1|ENSMUSG00000025925	2.79927	0.0844107	0.394208	0.972856	2.79919	-0.0095967	0.91742	0.972935	2.79928	0.0901339	0.389757	0.690619	2.79929	-0.0207979	0.789567	0.999801	2.79927	0.0699508	0.475274	0.725855
Sbspon|ENSMUSG00000032719	-1.56624	0.154978	0.657091	0.991393	-1.56628	0.46614	0.138052	0.410118	-1.56625	0.452596	0.21524	0.51265	-1.56627	0.172107	0.512343	0.999801	-1.5664	0.612047	0.0784984	0.259696
4930444P10Rik|ENSMUSG00000067795	-1.43142	-0.207017	0.603537	0.987824	-1.43154	0.561381	0.130282	0.396778	-1.43148	0.791422	0.0543569	0.226966	-1.43151	-0.434352	0.158188	0.999801	-1.43183	0.379687	0.330879	0.602861
Rpl7|ENSMUSG00000043716	6.90794	0.010659	0.814398	0.994968	6.90787	0.00682592	0.872768	0.95709	6.90794	-0.0205831	0.668526	0.867534	6.90794	0.0339196	0.3425	0.999801	6.9079	0.0154224	0.733817	0.885043
Rdh10|ENSMUSG00000025921	3.29121	0.189	0.0287629	0.563902	3.29114	-0.0132537	0.869776	0.956289	3.29121	0.182216	0.0468665	0.206246	3.29121	-0.00796039	0.907807	0.999801	3.2911	0.171153	0.0468552	0.184634
Stau2|ENSMUSG00000025920	7.32337	-0.0746001	0.116707	0.837616	7.32341	-0.0192302	0.660024	0.865343	7.32336	-0.0368502	0.457077	0.742655	7.32337	-0.059741	0.111292	0.999801	7.32344	-0.100556	0.0374709	0.158194
Ube2w|ENSMUSG00000025939	6.16217	0.0184502	0.698783	0.991393	6.16206	0.00157067	0.971933	0.99221	6.16219	-0.0367356	0.469594	0.750758	6.1622	0.0540144	0.154758	0.999801	6.16218	0.0124251	0.793677	0.914252
Tceb1|ENSMUSG00000079658	6.30055	-0.063491	0.177429	0.879142	6.30047	-0.0879082	0.0456275	0.211	6.30058	-0.170489	0.000704177	0.00933743	6.3006	0.0134915	0.718603	0.999801	6.30063	-0.155443	0.000851933	0.0088421
Tmem70|ENSMUSG00000025940	5.21339	-0.084403	0.176574	0.878634	5.21335	-0.0253658	0.655087	0.863545	5.21341	-0.157537	0.0217607	0.123119	5.21343	0.0417088	0.396669	0.999801	5.21351	-0.115828	0.0667888	0.233665
Ly96|ENSMUSG00000025779	-0.987751	-0.245663	0.37686	0.971278	-0.987782	0.14266	0.584295	0.826762	-0.987787	-0.30458	0.289097	0.601141	-0.987799	0.212024	0.315913	0.999801	-0.987822	-0.114116	0.664811	0.851259
Gm5828|ENSMUSG00000091020	0.48253	-0.148787	0.437608	0.977718	0.48203	-0.204369	0.264617	0.578807	0.4826	-0.425679	0.0408011	0.187647	0.482628	0.0720019	0.642524	0.999801	0.48238	-0.375496	0.0505724	0.194748
Jph1|ENSMUSG00000042686	4.83755	-0.010436	0.865315	0.99628	4.83748	-0.0318031	0.582684	0.825857	4.83758	0.00961557	0.883159	0.96075	4.83759	-0.0588648	0.229612	0.999801	4.83757	-0.0448798	0.465319	0.717028
Gdap1|ENSMUSG00000025777	7.18218	-0.0166019	0.710298	0.991393	7.18206	-0.0412884	0.323398	0.637067	7.1822	-0.0608316	0.200901	0.493723	7.18221	-0.00244345	0.945259	0.999801	7.18216	-0.0612884	0.168465	0.416449
Crispld1|ENSMUSG00000025776	3.25245	-0.0941544	0.314144	0.952987	3.25236	-0.193088	0.0292382	0.157518	3.25249	-0.239099	0.0215697	0.122524	3.25251	-0.0573181	0.442244	0.999801	3.2526	-0.291068	0.00330065	0.0255647
Gm16070|ENSMUSG00000085125	0.540752	-0.14141	0.46877	0.978767	0.540768	-0.233854	0.210819	0.515271	0.540741	-0.443141	0.0363403	0.174686	0.540761	0.0668137	0.665045	0.999801	0.540799	-0.371067	0.0610487	0.220301
Mcm3|ENSMUSG00000041859	1.98825	-0.142062	0.252157	0.931804	1.98814	0.139643	0.224217	0.531431	1.98825	0.0683203	0.602741	0.831044	1.98825	-0.0801716	0.403961	0.999801	1.98815	-0.00161311	0.989513	0.996754
6720483E21Rik|ENSMUSG00000097934	-1.34685	0.0317262	0.927196	0.997501	-1.34687	0.46056	0.162094	0.446582	-1.34687	0.200526	0.584483	0.820392	-1.3469	0.289796	0.286932	0.999801	-1.34687	0.486901	0.14879	0.387657
Paqr8|ENSMUSG00000025931	5.13952	0.0218928	0.737172	0.991393	5.13964	0.0750938	0.222376	0.530017	5.13949	0.107479	0.125388	0.377728	5.13949	-0.0103056	0.84076	0.999801	5.13961	0.0913989	0.164198	0.410254
Efhc1|ENSMUSG00000041809	0.188613	-0.129261	0.522277	0.984789	0.188343	0.107713	0.564977	0.813914	0.188612	0.107568	0.614498	0.8382	0.188608	-0.149219	0.35553	0.999801	0.188521	-0.0251766	0.897459	0.959302
Tram2|ENSMUSG00000041779	0.705413	0.0310057	0.855813	0.996047	0.705478	-0.181735	0.254694	0.568099	0.705431	-0.111308	0.542629	0.796556	0.705439	-0.0440533	0.751498	0.999801	0.705627	-0.149898	0.371334	0.641235
Tmem14a|ENSMUSG00000025933	4.89052	-0.116654	0.0560332	0.69346	4.89046	-0.153994	0.00677283	0.0572739	4.89054	-0.285938	1.52661e-05	0.000423202	4.89057	0.00803163	0.868191	0.999801	4.89064	-0.273922	8.79672e-06	0.000216673
Gsta3|ENSMUSG00000025934	0.0917073	-0.0269025	0.897087	0.997217	0.0917332	-0.18082	0.343058	0.656388	0.0917026	-0.158249	0.475807	0.754212	0.0917198	-0.0521941	0.748148	0.999801	0.0916836	-0.214379	0.305074	0.57828
Gm7094|ENSMUSG00000096375	0.98323	0.0850523	0.640152	0.990949	0.983104	-0.368262	0.0366982	0.18255	0.983261	-0.0895891	0.64945	0.858385	0.983296	-0.201167	0.176323	0.999801	0.983313	-0.290472	0.120628	0.342517
Gm7658|ENSMUSG00000082935	5.05891	-0.0282	0.631463	0.9909	5.0588	-0.0329395	0.548248	0.802905	5.05892	-0.0996184	0.11128	0.353698	5.05893	0.0335116	0.470402	0.999801	5.05888	-0.0637432	0.275261	0.546967
Kcnq5|ENSMUSG00000028033	7.21799	-0.059342	0.294747	0.943662	7.21794	-0.243987	7.48358e-05	0.00180015	7.21802	-0.202168	0.00190165	0.0203874	7.21806	-0.106458	0.0231767	0.828167	7.21808	-0.310155	5.7095e-06	0.000150382
Rims1|ENSMUSG00000041670	6.97097	0.0721383	0.111417	0.828835	6.97102	-0.0173346	0.68294	0.877203	6.97098	0.021614	0.651753	0.85952	6.97098	0.0307135	0.388543	0.999801	6.9711	0.0468193	0.297666	0.569544
Gm27028|ENSMUSG00000097970	-1.18753	-0.21368	0.427379	0.977718	-1.18739	-0.187083	0.475365	0.758679	-1.18754	-0.26224	0.357035	0.663274	-1.18752	-0.145565	0.503138	0.999801	-1.1874	-0.39449	0.131977	0.361538
Ogfrl1|ENSMUSG00000026158	7.50531	-0.0640238	0.205373	0.900656	7.50527	0.0158126	0.730007	0.89961	7.50532	-0.0137104	0.797666	0.927132	7.50532	-0.042081	0.283775	0.999801	7.50533	-0.0537354	0.280047	0.551183
B3gat2|ENSMUSG00000026156	3.48197	0.0969279	0.339617	0.967444	3.48207	0.294073	0.00372048	0.0371599	3.48195	0.282401	0.0126939	0.0840638	3.48193	0.10125	0.20393	0.999801	3.48203	0.394073	0.000404093	0.00490942
Smap1|ENSMUSG00000026155	6.07685	0.0426734	0.377427	0.971278	6.07686	0.0366614	0.415092	0.715059	6.07684	0.0935331	0.070264	0.269118	6.07685	-0.0176795	0.643255	0.999801	6.0769	0.0719221	0.135338	0.366107
1110058L19Rik|ENSMUSG00000026154	4.02257	-0.0431682	0.55965	0.984789	4.02245	0.0610395	0.377623	0.686315	4.02258	0.0238028	0.762167	0.913075	4.02258	-0.0107578	0.855548	0.999801	4.0225	0.0126417	0.862835	0.945708
Fam135a|ENSMUSG00000026153	5.67034	-0.0596101	0.24754	0.930311	5.67034	0.0309102	0.521959	0.789698	5.67034	-0.0492347	0.366991	0.671361	5.67034	0.0155193	0.701057	0.999801	5.67037	-0.0310828	0.543701	0.774245
Col9a1|ENSMUSG00000026147	-1.27898	-0.267295	0.386494	0.971865	-1.27897	0.255997	0.37905	0.687889	-1.27901	-0.153815	0.626037	0.845141	-1.27902	0.146495	0.531021	0.999801	-1.27907	-0.014231	0.962213	0.986332
Col19a1|ENSMUSG00000026141	3.17398	0.0233394	0.813037	0.994968	3.17398	-0.334012	0.000990297	0.0138504	3.174	-0.320536	0.00449345	0.0388601	3.17402	0.00476473	0.951137	0.999801	3.17414	-0.313863	0.00299971	0.0236664
Gm10222|ENSMUSG00000067736	2.82413	0.242528	0.0145604	0.466451	2.82425	-0.00681608	0.941237	0.981472	2.82412	0.119658	0.256001	0.563801	2.82411	0.113319	0.141833	0.999801	2.82422	0.23724	0.0167195	0.0883094
Lmbrd1|ENSMUSG00000073725	7.83099	-0.0394877	0.378532	0.971278	7.83091	-0.021732	0.604539	0.836292	7.83101	-0.0439002	0.354946	0.66181	7.83102	-0.0216755	0.539393	0.999801	7.83102	-0.0668036	0.135385	0.366107
Bai3|ENSMUSG00000033569	7.20974	-0.00956266	0.83129	0.994968	7.20966	-0.0361657	0.388471	0.696594	7.20977	-0.0770762	0.106272	0.343963	7.20978	0.024539	0.489997	0.999801	7.20975	-0.0503032	0.261621	0.532622
Gm9884|ENSMUSG00000052558	-0.971995	-0.0734788	0.784311	0.992931	-0.972021	-0.807773	0.00333044	0.0343414	-0.971995	-0.462075	0.110869	0.352786	-0.97198	-0.405482	0.0700512	0.999801	-0.971913	-0.888265	0.00239559	0.0199874
Gm7846|ENSMUSG00000086240	0.62992	-0.151401	0.399061	0.975146	0.629723	0.243808	0.140151	0.413591	0.629913	0.223342	0.247217	0.552812	0.629903	-0.142307	0.314372	0.999801	0.629725	0.0924249	0.608434	0.817003
Gm5697|ENSMUSG00000081557	0.303234	-0.262557	0.170696	0.875125	0.303208	0.0420796	0.815353	0.934639	0.303222	0.128909	0.533218	0.79222	0.30322	-0.356326	0.0218381	0.811712	0.30326	-0.220987	0.240427	0.508332
Phf3|ENSMUSG00000048874	6.80775	0.00505849	0.910965	0.997217	6.80771	-0.0205509	0.630028	0.849788	6.80778	-0.0347243	0.470374	0.751054	6.80779	0.0160484	0.655843	0.999801	6.8078	-0.0185054	0.682018	0.859805
Ptp4a1|ENSMUSG00000026064	4.33931	0.0548107	0.433895	0.977718	4.33929	0.125628	0.055023	0.237085	4.33931	0.210015	0.00460546	0.0396672	4.3393	-0.0352235	0.518715	0.999801	4.33935	0.17591	0.011753	0.0680347
Gm10307|ENSMUSG00000070960	0.704794	-0.0240204	0.89209	0.997217	0.70476	0.190012	0.245813	0.558591	0.704749	0.133767	0.465938	0.748112	0.704725	0.0245106	0.85663	0.999801	0.704638	0.168604	0.326944	0.599611
Khdrbs2|ENSMUSG00000026058	3.10158	0.186633	0.0400959	0.62067	3.10143	0.0190557	0.81983	0.936707	3.10159	0.237061	0.0162294	0.100377	3.10158	-0.0368715	0.611093	0.999801	3.10135	0.202357	0.0254046	0.1196
Prim2|ENSMUSG00000026134	2.80725	0.0399459	0.685934	0.991393	2.80721	0.15817	0.0836635	0.305988	2.80725	0.064397	0.541151	0.796235	2.80725	0.128444	0.101101	0.999801	2.80724	0.195927	0.0459181	0.181948
Rab23|ENSMUSG00000004768	3.41306	0.0213453	0.798945	0.994794	3.41299	-0.0683563	0.384049	0.693029	3.41308	-0.0904796	0.310991	0.623696	3.41309	0.0421432	0.53029	0.999801	3.41305	-0.0500491	0.548468	0.776753
Bag2|ENSMUSG00000042215	1.38512	0.284344	0.0511421	0.67233	1.3852	0.153513	0.250035	0.56308	1.3851	0.366986	0.0180463	0.107574	1.38507	0.073854	0.522493	0.999801	1.38511	0.433574	0.0026175	0.0214289
Zfp451|ENSMUSG00000042197	6.23245	0.018714	0.693316	0.991393	6.23239	0.000601322	0.989239	0.996682	6.23248	0.0169907	0.73634	0.900427	6.23249	-0.00258128	0.945334	0.999801	6.23249	0.015128	0.74885	0.892072
Gm15455|ENSMUSG00000081402	2.24085	0.103005	0.367732	0.970269	2.24084	-0.0631397	0.554174	0.807052	2.24084	0.0790651	0.51537	0.781344	2.24084	-0.0366796	0.683022	0.999801	2.24083	0.0322814	0.779153	0.907702
Bend6|ENSMUSG00000042182	6.47269	0.037217	0.420462	0.977718	6.47271	-0.000677531	0.987515	0.996609	6.47268	0.0299875	0.541682	0.796235	6.47268	0.00521854	0.887226	0.999801	6.47275	0.0328485	0.474965	0.725823
Dst|ENSMUSG00000026131	9.19514	0.0395699	0.381002	0.971278	9.19514	-0.082705	0.0535746	0.233539	9.19515	-0.0707601	0.141927	0.405519	9.19516	0.0256859	0.479203	0.999801	9.19518	-0.0480368	0.28883	0.561231
D630036G22Rik|ENSMUSG00000098168	-0.39075	-0.0821946	0.772791	0.99203	-0.39074	0.134429	0.624022	0.846115	-0.390738	0.110686	0.716912	0.892495	-0.390716	-0.05078	0.828195	0.999801	-0.390685	0.0515581	0.856012	0.942634
Ccdc115|ENSMUSG00000042111	4.07525	0.016823	0.819189	0.994968	4.07506	-0.0411189	0.546748	0.802529	4.07527	-0.0725523	0.355668	0.661858	4.07529	0.0429562	0.464157	0.999801	4.07519	-0.0300485	0.681159	0.859689
Imp4|ENSMUSG00000026127	3.60016	-0.112955	0.161783	0.871395	3.60017	0.0115177	0.878299	0.958596	3.60017	-0.108549	0.206408	0.500734	3.60018	0.00506087	0.937281	0.999801	3.60024	-0.10571	0.190393	0.445831
Ptpn18|ENSMUSG00000026126	-0.104782	0.165282	0.467613	0.978767	-0.104658	-0.133698	0.530287	0.793186	-0.104818	0.0804799	0.736765	0.900532	-0.104824	-0.0466819	0.794141	0.999801	-0.104632	0.018088	0.936834	0.976954
Amer3|ENSMUSG00000045174	4.87142	0.0679458	0.270032	0.939125	4.87139	0.0638437	0.266521	0.581269	4.87141	0.15893	0.0151829	0.095663	4.8714	-0.0328982	0.49854	0.999801	4.87132	0.12577	0.0398795	0.165101
Arhgef4|ENSMUSG00000037509	7.47588	-0.0424238	0.345203	0.969129	7.47577	-0.310408	2.12872e-11	9.4034e-09	7.47591	-0.381083	3.58617e-12	1.46281e-09	7.47595	0.0252933	0.474663	0.999801	7.47598	-0.358784	4.56754e-12	1.62661e-09
C230030N03Rik|ENSMUSG00000046858	0.999508	0.0245841	0.879496	0.996828	0.999653	-0.0643557	0.667083	0.869265	0.999497	-0.174784	0.308074	0.621253	0.999502	0.135614	0.295873	0.999801	0.999647	-0.0485745	0.758191	0.896904
Fam168b|ENSMUSG00000037503	8.49687	-0.0224924	0.615815	0.987917	8.49686	-0.0743423	0.076325	0.289314	8.49688	-0.101713	0.0326195	0.162595	8.49689	0.000515552	0.988429	0.999801	8.49694	-0.102027	0.0222874	0.108673
Plekhb2|ENSMUSG00000026123	8.36922	0.000577633	0.98969	0.999487	8.36916	-0.112201	0.00735572	0.060784	8.36923	-0.101335	0.0328182	0.163395	8.36925	-0.0128602	0.716914	0.999801	8.36925	-0.116828	0.0089782	0.0554656
Hs6st1|ENSMUSG00000045216	5.78638	-0.0135434	0.787815	0.994297	5.78641	0.118618	0.0145361	0.0980597	5.78637	0.0865542	0.104838	0.341257	5.78637	0.01444	0.718456	0.999801	5.78634	0.103756	0.0390938	0.162794
Uggt1|ENSMUSG00000037470	6.02259	0.0437744	0.365711	0.970269	6.0226	-0.00205656	0.963789	0.989936	6.0226	0.0522417	0.312205	0.624894	6.0226	-0.0122425	0.750382	0.999801	6.02264	0.0359403	0.45703	0.711654
Neurl3|ENSMUSG00000047180	0.628819	-0.16598	0.365316	0.970269	0.628906	-0.175171	0.306916	0.621414	0.628787	-0.104565	0.584231	0.820284	0.628782	-0.244943	0.0937602	0.999801	0.628831	-0.345402	0.0627916	0.224317
Arid5a|ENSMUSG00000037447	2.95648	-0.0312575	0.755886	0.991393	2.9567	0.0463482	0.626326	0.847896	2.9565	0.046851	0.657485	0.862246	2.95651	-0.0362791	0.647243	0.999801	2.9568	0.00916607	0.926189	0.972378
Kansl3|ENSMUSG00000010453	6.23432	0.00152671	0.974272	0.999487	6.23434	-0.0207555	0.640482	0.856186	6.23431	-0.00691353	0.89067	0.964231	6.23432	-0.0126824	0.736123	0.999801	6.23436	-0.0233065	0.619691	0.822693
Lman2l|ENSMUSG00000001143	5.69165	0.13109	0.0106666	0.399839	5.69176	0.204825	3.63104e-05	0.00100375	5.69161	0.287514	1.55698e-06	6.58621e-05	5.69159	0.0460925	0.253596	0.999801	5.69161	0.330742	3.06365e-08	1.97623e-06
Cnnm4|ENSMUSG00000037408	3.86296	0.034273	0.656029	0.991393	3.86307	0.0922275	0.19719	0.498123	3.86297	0.194113	0.0181583	0.108092	3.86297	-0.0712254	0.240261	0.999801	3.86306	0.122335	0.110661	0.32575
Cnnm3|ENSMUSG00000001138	3.80712	0.0495517	0.524693	0.984789	3.80707	-0.0331071	0.649949	0.860337	3.80712	-0.0202574	0.80564	0.930413	3.80712	0.0348675	0.571594	0.999801	3.80709	0.00753455	0.922326	0.970567
Ankrd23|ENSMUSG00000067653	1.27273	-0.00596692	0.968614	0.999487	1.27285	0.037946	0.790065	0.925162	1.2727	0.0561074	0.724882	0.895765	1.27268	-0.0238814	0.83757	0.999801	1.27275	0.0295181	0.843875	0.937397
Ankrd39|ENSMUSG00000079610	2.43166	-0.00399983	0.9707	0.999487	2.43165	0.109826	0.276969	0.591954	2.43163	0.186983	0.104283	0.34004	2.43162	-0.0842985	0.324016	0.999801	2.43145	0.102055	0.344065	0.614174
Sema4c|ENSMUSG00000026121	3.87206	-0.127761	0.117846	0.83891	3.87212	0.243437	0.0024978	0.0275351	3.87201	0.165931	0.0574546	0.235607	3.87198	-0.0585843	0.346249	0.999801	3.87192	0.107518	0.183504	0.437796
Fam178b|ENSMUSG00000046337	-1.5166	-0.504497	0.18499	0.890256	-1.51665	-0.0664871	0.851632	0.949079	-1.51659	-0.297411	0.453532	0.739692	-1.51656	-0.282561	0.339609	0.999801	-1.51655	-0.594741	0.105766	0.315824
Cox5b|ENSMUSG00000061518	5.87301	0.0845775	0.217953	0.910875	5.87294	-0.261975	0.000216756	0.0041829	5.87302	-0.163372	0.029366	0.151501	5.87305	-0.01706	0.753826	0.999801	5.87305	-0.183506	0.00955827	0.0581249
Actr1b|ENSMUSG00000037351	7.26664	0.0273464	0.541362	0.984789	7.26664	0.000418996	0.991987	0.997653	7.26663	0.00818565	0.863594	0.954317	7.26664	0.0166339	0.638635	0.999801	7.26665	0.0204836	0.646225	0.83864
Zap70|ENSMUSG00000026117	-0.806724	0.0338623	0.902955	0.997217	-0.806533	0.31489	0.21242	0.517564	-0.806754	0.366314	0.218457	0.516824	-0.806774	-0.0257148	0.900545	0.999801	-0.806646	0.343184	0.216454	0.478726
Tmem131|ENSMUSG00000026116	6.60594	0.0346373	0.448995	0.977718	6.606	0.0360255	0.403292	0.707006	6.60594	0.0416331	0.391847	0.692306	6.60595	0.0266485	0.463284	0.999801	6.60601	0.0654411	0.150647	0.390607
Vwa3b|ENSMUSG00000050122	-1.96513	0.782556	0.045538	0.649314	-1.96535	-0.327541	0.321608	0.635467	-1.96512	0.411562	0.331308	0.64295	-1.96513	0.0357606	0.910238	0.999801	-1.96529	0.469361	0.231485	0.497425
Inpp4a|ENSMUSG00000026113	6.55306	-0.0367953	0.422938	0.977718	6.553	-0.216805	1.37115e-06	6.80621e-05	6.55311	-0.220822	6.13588e-06	0.000198888	6.55315	-0.035369	0.334018	0.999801	6.55322	-0.261712	1.73505e-07	8.31382e-06
Coa5|ENSMUSG00000026112	7.22426	0.0424592	0.345282	0.969129	7.22423	-0.0675474	0.106031	0.353364	7.22428	-0.0660198	0.16653	0.444264	7.22429	0.0361685	0.306735	0.999801	7.22429	-0.0291068	0.516844	0.756481
Unc50|ENSMUSG00000026111	4.97279	0.0779823	0.194693	0.896661	4.97272	-0.0184271	0.741158	0.90427	4.9728	0.0710426	0.267179	0.577192	4.9728	-0.0149609	0.752745	0.999801	4.9728	0.0522762	0.383131	0.651891
Mgat4a|ENSMUSG00000026110	5.99616	-0.0179286	0.712849	0.991393	5.99619	-0.00926724	0.839051	0.943664	5.99617	-0.00234753	0.96393	0.988244	5.99619	-0.0283257	0.461639	0.999801	5.99625	-0.0340377	0.483195	0.73217
2010300C02Rik|ENSMUSG00000026090	8.75036	-0.0662577	0.142964	0.856329	8.7503	-0.212211	1.21341e-05	0.000413499	8.7504	-0.287147	6.29044e-07	3.16035e-05	8.75043	0.00479167	0.893384	0.999801	8.75049	-0.286717	3.20622e-07	1.37361e-05
Tsga10|ENSMUSG00000060771	4.8503	-0.00855491	0.888913	0.997217	4.85025	-0.0651106	0.256539	0.569865	4.85033	-0.0637441	0.328176	0.640136	4.85035	-0.012485	0.799848	0.999801	4.85041	-0.0786406	0.194379	0.450784
Gm26805|ENSMUSG00000097268	1.64468	-0.165908	0.219034	0.911326	1.64477	-0.205467	0.109328	0.359972	1.6447	-0.207144	0.154744	0.427894	1.64473	-0.169463	0.121538	0.999801	1.64474	-0.370995	0.00856898	0.0535961
Lipt1|ENSMUSG00000037216	1.38748	-0.10382	0.468593	0.978767	1.38738	0.000506809	0.997008	0.999186	1.3875	-0.041127	0.78865	0.923839	1.38752	-0.0674686	0.558305	0.999801	1.38743	-0.105362	0.462991	0.715716
Mitd1|ENSMUSG00000026088	2.83426	-0.076913	0.425907	0.977718	2.83423	-0.0243517	0.789922	0.925122	2.83427	-0.100763	0.323379	0.635335	2.83428	-0.000293995	0.996992	0.999801	2.83438	-0.105504	0.268193	0.539272
Mrpl30|ENSMUSG00000026087	4.99554	-0.0505515	0.399071	0.975146	4.99554	0.0867746	0.12023	0.379795	4.99553	-0.0332798	0.60092	0.830196	4.99553	0.0652219	0.164951	0.999801	4.99555	0.0303236	0.612645	0.818844
Txndc9|ENSMUSG00000058407	5.56179	-0.0735781	0.160176	0.871395	5.56172	0.0449637	0.358067	0.670132	5.5618	-0.0343808	0.536987	0.794375	5.56181	0.000466292	0.99102	0.999801	5.56182	-0.0368795	0.477355	0.727386
Eif5b|ENSMUSG00000026083	6.58682	0.00456385	0.920984	0.997501	6.58677	0.0218627	0.611292	0.840246	6.58682	-0.0257897	0.599111	0.829009	6.58683	0.0486113	0.183098	0.999801	6.58683	0.0219862	0.631725	0.829967
Rev1|ENSMUSG00000026082	5.38432	-0.0356653	0.510684	0.984789	5.38428	-0.0649582	0.20222	0.505497	5.38433	-0.0765027	0.18116	0.465102	5.38434	-0.0276249	0.517817	0.999801	5.38431	-0.103395	0.0539912	0.203736
Aff3|ENSMUSG00000037138	6.56774	-0.11552	0.0691911	0.735147	6.56765	-0.20529	0.00107627	0.0147762	6.56777	-0.341561	1.04715e-05	0.000307715	6.56781	0.0165761	0.734602	0.999801	6.56787	-0.329048	7.90445e-06	0.000198915
Lonrf2|ENSMUSG00000048814	7.6325	0.0434647	0.32864	0.961023	7.63243	-0.097367	0.0196401	0.12094	7.63254	-0.0354713	0.45332	0.739692	7.63256	-0.0214108	0.545069	0.999801	7.63256	-0.0596065	0.178966	0.431183
Chst10|ENSMUSG00000026080	6.31608	0.026251	0.576503	0.985108	6.31607	-0.0192096	0.661712	0.866095	6.31608	-0.00453178	0.927824	0.978054	6.31609	0.00896999	0.809685	0.999801	6.31612	0.000504054	0.991383	0.997011
Pdcl3|ENSMUSG00000026078	4.72781	-0.00504394	0.936692	0.997501	4.72779	0.0315045	0.595435	0.831904	4.72782	-0.0100064	0.882756	0.960728	4.72782	0.033358	0.508509	0.999801	4.72785	0.0227226	0.719528	0.877849
Npas2|ENSMUSG00000026077	6.31038	-0.1735	0.00806779	0.341417	6.3104	-0.0727552	0.212091	0.517204	6.31037	-0.183136	0.00824647	0.0607388	6.31039	-0.0673965	0.174444	0.999801	6.31039	-0.249495	0.000269679	0.00351418
Rpl31|ENSMUSG00000073702	3.87479	-0.140019	0.0709151	0.737566	3.87483	-0.000690556	0.992349	0.997713	3.87477	-0.114705	0.159382	0.435312	3.87478	-0.0308672	0.612279	0.999801	3.87486	-0.14486	0.0609303	0.220019
Tbc1d8|ENSMUSG00000003134	7.03009	-0.130922	0.0492485	0.669366	7.0301	-0.162739	0.00933395	0.0719744	7.0301	-0.203799	0.00499559	0.0419531	7.03014	-0.0944714	0.0647605	0.999801	7.03023	-0.300103	5.0199e-05	0.000891072
Cnot11|ENSMUSG00000003135	4.83371	0.0185689	0.763944	0.991393	4.83368	0.00139324	0.980834	0.994507	4.83371	0.0233574	0.722749	0.895245	4.83372	-0.00734809	0.881343	0.999801	4.83374	0.0181276	0.767877	0.902384
Gm15832|ENSMUSG00000085894	3.25937	-0.372165	0.00115405	0.143328	3.25943	0.0454708	0.642485	0.857061	3.25938	-0.181073	0.111847	0.354779	3.2594	-0.151669	0.0738324	0.999801	3.2595	-0.330193	0.00293342	0.023291
Rnf149|ENSMUSG00000048234	4.97908	-0.191557	0.00383699	0.256884	4.97905	-0.0980948	0.0951107	0.330005	4.9791	-0.199289	0.00474148	0.0404921	4.97913	-0.0959445	0.056041	0.996196	4.97917	-0.292404	3.96238e-05	0.000745958
D930019O06Rik|ENSMUSG00000097083	-0.708219	0.244796	0.421238	0.977718	-0.708488	-0.288774	0.313118	0.626558	-0.708213	0.284043	0.385173	0.688066	-0.708215	-0.342244	0.175156	0.999801	-0.708328	-0.0499869	0.86815	0.94771
Creg2|ENSMUSG00000050967	6.25487	-0.0347391	0.542154	0.984789	6.25475	-0.20641	0.000496492	0.00805217	6.2549	-0.1759	0.00701992	0.0539306	6.25493	-0.0703188	0.131395	0.999801	6.25486	-0.246261	0.000133601	0.00200155
Rfx8|ENSMUSG00000057173	-2.15385	-0.45989	0.200129	0.897221	-2.15388	-0.0611866	0.858296	0.951989	NA	NA	NA	NA	NA	NA	NA	NA	NA	NA	NA	NA
Map4k4|ENSMUSG00000026074	7.1686	0.123739	0.00577701	0.299466	7.16866	-0.0270368	0.522778	0.790164	7.16859	0.0766803	0.106234	0.343963	7.16858	0.0179984	0.609957	0.999801	7.16865	0.0945029	0.0353223	0.151518
Il1r2|ENSMUSG00000026073	-1.98754	-0.531618	0.165979	0.87426	-1.98765	0.379229	0.281102	0.596557	-1.98752	-0.2857	0.493129	0.766397	-1.98751	0.112477	0.719531	0.999801	-1.98765	-0.137372	0.718878	0.877644
Gm16894|ENSMUSG00000097899	0.118003	-0.0660561	0.739115	0.991393	0.117987	-0.219287	0.231448	0.541267	0.118036	-0.319558	0.134821	0.39404	0.118059	0.0290505	0.857041	0.999801	0.118073	-0.289245	0.144679	0.381071
Il1r1|ENSMUSG00000026072	2.11784	-0.0927999	0.434782	0.977718	2.11802	0.319503	0.00479673	0.0445318	2.11778	0.266001	0.0345403	0.16936	2.11777	-0.0403662	0.669568	0.999801	2.11789	0.230087	0.0515286	0.197142
Il1rl2|ENSMUSG00000070942	-0.9469	-0.471989	0.159777	0.871395	-0.947028	0.545955	0.0762088	0.289129	-0.946914	-0.0830911	0.808272	0.931538	-0.946918	0.140572	0.584156	0.999801	-0.947092	0.0668866	0.832312	0.932097
Il1rl1|ENSMUSG00000026069	-1.49165	0.409481	0.187897	0.893941	-1.49176	-0.253602	0.366188	0.677302	-1.49166	0.108803	0.741755	0.903031	-1.49166	0.0356515	0.881769	0.999801	-1.49174	0.16531	0.589363	0.803939
Slc9a2|ENSMUSG00000026062	3.92995	-0.0991922	0.194441	0.896661	3.93005	0.248483	0.000505042	0.0081677	3.92991	0.162196	0.0454384	0.201935	3.92989	-0.0187697	0.753161	0.999801	3.92984	0.151684	0.0464982	0.183608
Mfsd9|ENSMUSG00000041945	2.6646	-0.122027	0.235852	0.92362	2.66457	0.272456	0.00427467	0.0411302	2.66458	0.103216	0.347992	0.656486	2.66458	0.0408422	0.615459	0.999801	2.66451	0.142011	0.164232	0.410257
2610017I09Rik|ENSMUSG00000060424	5.55347	-0.0740791	0.157918	0.87118	5.55356	0.0825153	0.0913966	0.322925	5.55345	-0.0472766	0.397057	0.696073	5.55345	0.0516516	0.212317	0.999801	5.55355	0.00573531	0.912587	0.967367
Gm20646|ENSMUSG00000093436	0.680797	0.106939	0.543751	0.984789	0.680742	-0.282369	0.0900591	0.320037	0.680789	-0.182279	0.327542	0.639554	0.680793	0.00846973	0.951689	0.999801	0.680817	-0.18431	0.296039	0.568212
Pou3f3|ENSMUSG00000045515	6.38499	-0.0736404	0.148008	0.857641	6.38513	0.0210691	0.658344	0.864926	6.38496	0.00829313	0.87486	0.958922	6.38496	-0.0630052	0.115875	0.999801	6.38514	-0.0602466	0.235548	0.502341
2610207O16Rik|ENSMUSG00000097063	-0.631065	-0.0480212	0.848612	0.995521	-0.630819	0.201121	0.383315	0.692429	-0.631105	0.307843	0.241556	0.545738	-0.631122	-0.155664	0.406984	0.999801	-0.631024	0.144642	0.554128	0.780011
Mrps9|ENSMUSG00000060679	4.86995	0.0278236	0.650037	0.991393	4.86987	-0.0557339	0.330083	0.642909	4.86995	-0.017555	0.789303	0.924095	4.86995	-0.0124017	0.799222	0.999801	4.86991	-0.0322145	0.599248	0.811456
Gpr45|ENSMUSG00000041907	1.45311	0.20806	0.143039	0.856329	1.45313	0.00426078	0.974598	0.993259	1.45311	0.178696	0.241536	0.545738	1.4531	0.0319704	0.78015	0.999801	1.45302	0.207989	0.141788	0.376647
Gpr45|ENSMUSG00000096364	-0.950244	-0.0848839	0.74972	0.991393	-0.950199	0.569114	0.023406	0.135718	-0.950285	0.493208	0.0793138	0.290626	-0.95031	-0.011114	0.956381	0.999801	-0.950409	0.485448	0.0646766	0.228662
8430432A02Rik|ENSMUSG00000041878	-0.483837	0.226682	0.434736	0.977718	-0.484062	0.0231535	0.931047	0.978448	-0.483859	-0.0292402	0.92241	0.976277	-0.483887	0.275114	0.212754	0.999801	-0.484034	0.247913	0.391742	0.659794
Tgfbrap1|ENSMUSG00000070939	5.77053	0.0683987	0.176355	0.878634	5.77055	-0.0245819	0.604492	0.836292	5.77052	0.0520358	0.331554	0.643136	5.77052	-0.0100361	0.800652	0.999801	5.77055	0.0380225	0.450459	0.706869
AI597479|ENSMUSG00000010290	5.58188	0.0426796	0.410547	0.97686	5.58178	-0.0928944	0.0557602	0.238942	5.58191	-0.0808693	0.142682	0.406929	5.58192	0.0278905	0.499806	0.999801	5.5819	-0.0549465	0.286362	0.558289
Fhl2|ENSMUSG00000008136	3.25809	0.125754	0.155203	0.866502	3.25815	0.285328	0.00108538	0.0148655	3.25809	0.318727	0.00121875	0.0143601	3.25808	0.0880904	0.20059	0.999801	3.25818	0.399966	4.83457e-05	0.000865362
Nck2|ENSMUSG00000066877	4.27969	0.0969078	0.170248	0.874927	4.27969	0.108736	0.0997517	0.339076	4.27967	0.1688	0.0250006	0.135676	4.27966	0.0333007	0.550555	0.999801	4.27966	0.200904	0.00414245	0.0307339
1500015O10Rik|ENSMUSG00000026051	-0.902681	-0.58814	0.308021	0.949368	-0.903759	-0.212894	0.667112	0.869265	NA	NA	NA	NA	NA	NA	NA	NA	NA	NA	NA	NA
Uxs1|ENSMUSG00000057363	5.52851	-0.0947727	0.0706177	0.737385	5.52844	-0.0802936	0.0995308	0.338755	5.52854	-0.202511	0.000284427	0.0046144	5.52856	0.0205721	0.621674	0.999801	5.5286	-0.18007	0.000525234	0.00604603
Tpp2|ENSMUSG00000041763	6.14553	0.0262066	0.583977	0.986476	6.14543	0.000414842	0.992602	0.997713	6.14556	0.00573249	0.910657	0.971879	6.14557	0.0170855	0.653808	0.999801	6.14553	0.0213048	0.655502	0.845225
Tex30|ENSMUSG00000026049	1.57071	0.00801195	0.953823	0.999369	1.57059	-0.0958634	0.454615	0.744149	1.57074	-0.017965	0.903528	0.969867	1.57075	-0.0815979	0.459503	0.999801	1.57068	-0.0905799	0.510272	0.752402
Kdelc1|ENSMUSG00000026047	3.50794	0.0960228	0.245952	0.929326	3.50789	0.100683	0.193595	0.493381	3.50793	0.281926	0.00129962	0.0151366	3.50792	-0.0890121	0.173172	0.999801	3.50786	0.194123	0.0182698	0.094181
Bivm|ENSMUSG00000041684	4.66095	-0.0497204	0.437872	0.977718	4.66082	-0.0222752	0.710665	0.892373	4.66097	-0.113283	0.0964948	0.326131	4.66098	0.0365715	0.476806	0.999801	4.66087	-0.0737854	0.243772	0.51255
Ercc5|ENSMUSG00000026048	5.0365	0.0564867	0.339959	0.967444	5.03649	0.01764	0.74945	0.907871	5.0365	0.0599918	0.338261	0.648583	5.0365	0.00972211	0.834334	0.999801	5.03647	0.0704931	0.22982	0.495291
Gulp1|ENSMUSG00000056870	3.54726	0.172332	0.0706749	0.737385	3.54716	-0.180727	0.046412	0.213176	3.54731	-0.0356076	0.72055	0.894402	3.54732	0.0226332	0.762528	0.999801	3.54723	-0.00304841	0.973807	0.990975
Col3a1|ENSMUSG00000026043	0.0616318	0.261559	0.292341	0.943662	0.0618346	-0.140108	0.529907	0.792936	0.0616092	-0.229845	0.388941	0.690001	0.0615782	0.351077	0.0687588	0.999801	0.0616925	0.120568	0.625794	0.826431
Col5a2|ENSMUSG00000026042	1.44343	-0.1202	0.402342	0.97622	1.44328	0.0270257	0.838211	0.943154	1.44347	-0.150703	0.322739	0.634587	1.44347	0.04703	0.678156	0.999801	1.44335	-0.0963583	0.495778	0.741933
Wdr75|ENSMUSG00000025995	5.08779	-0.0283315	0.625722	0.989728	5.08776	-0.0422002	0.435216	0.732055	5.0878	-0.0984549	0.111318	0.353698	5.08782	0.0244594	0.596517	0.999801	5.08785	-0.0744264	0.195351	0.452177
Gm5526|ENSMUSG00000084817	4.64932	0.0181697	0.781038	0.992394	4.64926	-0.0171736	0.774998	0.917971	4.64932	-0.0227436	0.743699	0.904005	4.64933	0.0182924	0.720538	0.999801	4.6493	-0.00406181	0.950296	0.980585
Slc40a1|ENSMUSG00000025993	3.68009	-0.0664241	0.434686	0.977718	3.68024	0.0832421	0.299002	0.613909	3.68006	0.0446355	0.621101	0.842427	3.68004	-0.0333392	0.61846	0.999801	3.68011	0.0111878	0.892949	0.957768
Dnah7b|ENSMUSG00000041144	2.48553	0.168692	0.116765	0.837616	2.48566	0.143205	0.154218	0.434187	2.4855	0.176362	0.116775	0.364008	2.48548	0.137486	0.102328	0.999801	2.48561	0.307918	0.00358149	0.0272825
Slc39a10|ENSMUSG00000025986	7.44777	-0.00392767	0.930501	0.997501	7.44764	-0.0873395	0.0360045	0.180653	7.4478	-0.0727896	0.129214	0.384657	7.44782	-0.0254753	0.470865	0.999801	7.44781	-0.0974067	0.0299431	0.134626
Gm4852|ENSMUSG00000081185	-0.845141	0.561953	0.0549311	0.688573	-0.845128	-0.0827222	0.743437	0.905441	-0.845124	0.566402	0.0678311	0.262974	-0.84513	-0.0911475	0.678621	0.999801	-0.845012	0.451707	0.117034	0.335877
Tmeff2|ENSMUSG00000026109	5.92778	-0.0821603	0.100062	0.809693	5.92774	0.0292508	0.527806	0.792609	5.92778	0.060811	0.244145	0.549039	5.92779	-0.118951	0.0036105	0.435192	5.92785	-0.0589191	0.230021	0.49546
Sdpr|ENSMUSG00000045954	3.7178	-0.0510865	0.608131	0.987824	3.7179	0.137715	0.143238	0.418066	3.71779	0.0634932	0.544123	0.798041	3.71781	0.0195263	0.800922	0.999801	3.71788	0.0844559	0.394485	0.661639
Nabp1|ENSMUSG00000026107	2.86177	0.0579804	0.547192	0.984789	2.86168	-0.0851071	0.342814	0.656099	2.86179	-0.0705471	0.490246	0.764666	2.86179	0.0405475	0.597234	0.999801	2.86175	-0.0332587	0.727712	0.88136
Myo1b|ENSMUSG00000018417	6.98168	-0.0297457	0.509711	0.984789	6.98167	-0.0620149	0.142616	0.417137	6.9817	-0.0947983	0.0478041	0.208551	6.98171	-0.00178627	0.960084	0.999801	6.98177	-0.0956915	0.0330177	0.144571
Stat4|ENSMUSG00000062939	-0.610058	-0.0444094	0.885333	0.996828	-0.610009	0.543644	0.0682672	0.271029	-0.61003	-0.074662	0.820696	0.937219	-0.610034	0.561225	0.0323373	0.909123	-0.609908	0.51513	0.0905228	0.285392
Stat1|ENSMUSG00000026104	4.63219	0.212499	0.0651098	0.726814	4.63217	0.0183586	0.861522	0.952693	4.6322	0.332217	0.00803431	0.0595861	4.63218	-0.108225	0.223305	0.999801	4.63217	0.223948	0.0505691	0.194748
Gls|ENSMUSG00000026103	8.19931	0.004335	0.922529	0.997501	8.19929	-0.090084	0.0313182	0.164896	8.19933	-0.0754025	0.110173	0.351553	8.19934	-0.0143358	0.683632	0.999801	8.19936	-0.0889741	0.0446036	0.178268
Nab1|ENSMUSG00000002881	5.0182	0.0268664	0.653808	0.991393	5.01827	0.158255	0.00476732	0.0444839	5.01817	0.163226	0.00981861	0.0692752	5.01816	0.0183092	0.693261	0.999801	5.01823	0.182322	0.0022131	0.0187466
Tmem194b|ENSMUSG00000043015	1.8408	0.0725924	0.608162	0.987824	1.84063	0.10152	0.43565	0.732134	1.84079	0.00575453	0.968761	0.990112	1.84076	0.158965	0.14083	0.999801	1.84065	0.165062	0.243102	0.511834
Mfsd6|ENSMUSG00000041439	6.39918	0.0134603	0.772641	0.99203	6.39909	0.00361447	0.933879	0.979045	6.39919	0.00863506	0.861296	0.953451	6.39919	0.00558207	0.880253	0.999801	6.39921	0.0111346	0.810335	0.922167
Inpp1|ENSMUSG00000026102	4.19933	0.0649415	0.362376	0.970269	4.19927	-0.0416101	0.532966	0.794191	4.19934	0.0399684	0.598012	0.828539	4.19934	-0.0182946	0.747652	0.999801	4.19929	0.0175385	0.803747	0.919619
Hibch|ENSMUSG00000041426	4.24982	-0.0307218	0.663978	0.991393	4.24984	0.140398	0.0337531	0.173499	4.2498	0.156807	0.036547	0.175237	4.24979	-0.0529415	0.346873	0.999801	4.24981	0.106248	0.129386	0.35777
1700019D03Rik|ENSMUSG00000043629	2.93611	0.202483	0.0504157	0.670345	2.93603	0.256622	0.00870032	0.0684507	2.93611	0.319307	0.00496936	0.0418961	2.93608	0.134507	0.0931292	0.999801	2.93598	0.456275	6.8046e-05	0.00114599
Pms1|ENSMUSG00000026098	2.4933	0.0462343	0.664716	0.991393	2.49311	-0.0533422	0.589753	0.828887	2.49333	-0.0066612	0.9533	0.984505	2.49334	-0.0074762	0.93	0.999801	2.49324	-0.00597189	0.955245	0.982992
Ormdl1|ENSMUSG00000026097	3.42103	-0.00920971	0.913556	0.997217	3.42085	0.195138	0.0132673	0.0920671	3.42103	0.23297	0.00990571	0.0696939	3.42102	-0.0539121	0.418888	0.999801	3.42082	0.182716	0.0315661	0.139935
Osgepl1|ENSMUSG00000026096	4.43107	0.0205776	0.764603	0.991393	4.431	-0.00953262	0.881564	0.959436	4.43106	0.0528026	0.466939	0.749096	4.43106	-0.0470785	0.379668	0.999801	4.431	0.00590143	0.931445	0.974861
Asnsd1|ENSMUSG00000026095	4.4971	-0.0296273	0.65959	0.991393	4.49706	0.0586572	0.34783	0.660515	4.4971	0.0617855	0.390105	0.690778	4.49711	-0.0375445	0.478241	0.999801	4.49708	0.0248844	0.711629	0.874144
Dnah7a|ENSMUSG00000096141	-0.856164	0.27176	0.29673	0.943786	-0.85615	0.121591	0.611337	0.840246	-0.85616	0.445612	0.103813	0.339268	-0.856178	-0.0601221	0.760876	0.999801	-0.856154	0.392448	0.124858	0.349889
Stk17b|ENSMUSG00000026094	3.79785	-0.0450715	0.563579	0.984789	3.7979	0.0651095	0.37647	0.685171	3.79785	-0.00625155	0.939984	0.981775	3.79785	0.0229861	0.709322	0.999801	3.79793	0.0195428	0.802064	0.918933
Hecw2|ENSMUSG00000042807	6.55197	-0.122694	0.00805718	0.341417	6.55193	-0.048768	0.259593	0.573295	6.55199	-0.107835	0.0283896	0.148193	6.55201	-0.0699626	0.0552878	0.996196	6.55205	-0.176648	0.000187684	0.00263188
Gtf3c3|ENSMUSG00000041303	4.86219	0.0190291	0.756449	0.991393	4.86206	0.00506663	0.929669	0.977475	4.8622	0.0343939	0.598212	0.828564	4.86221	-0.0148184	0.76213	0.999801	4.86214	0.0191848	0.753032	0.894285
Pgap1|ENSMUSG00000073678	6.29049	-0.0274165	0.561091	0.984789	6.29057	0.142649	0.00251011	0.0276191	6.29048	0.203663	0.000277989	0.0045312	6.29047	-0.0915371	0.0178269	0.770371	6.29052	0.110258	0.0228236	0.110555
Ankrd44|ENSMUSG00000052331	3.87432	0.0545273	0.478622	0.978767	3.87431	0.0365947	0.612149	0.840667	3.87431	0.0614352	0.446719	0.735743	3.8743	0.0255589	0.672322	0.999801	3.87428	0.0902869	0.234381	0.501251
Sf3b1|ENSMUSG00000025982	8.71797	-0.00777907	0.863651	0.996047	8.71798	0.0736462	0.0841982	0.307485	8.71796	0.062694	0.191932	0.480386	8.71796	-0.00107877	0.975845	0.999801	8.71799	0.0616366	0.173492	0.423123
Coq10b|ENSMUSG00000025981	5.1053	-0.0289987	0.755074	0.991393	5.10528	0.073652	0.395806	0.702059	5.10534	0.0801085	0.41501	0.709577	5.10537	-0.0397328	0.584152	0.999801	5.10549	0.0384225	0.677067	0.857508
Hspd1|ENSMUSG00000025980	6.97967	-0.0197912	0.65988	0.991393	6.9796	0.009844	0.815297	0.934639	6.97969	-0.00262778	0.956161	0.98538	6.9797	-0.0105596	0.767887	0.999801	6.97973	-0.0167643	0.708899	0.872295
Hspe1|ENSMUSG00000073676	4.77951	-0.0834058	0.219744	0.911326	4.77947	0.0905462	0.153599	0.433107	4.7795	0.00334049	0.962343	0.987761	4.77951	0.000113199	0.998296	0.999801	4.77952	-0.000370464	0.995566	0.998311
Gm16581|ENSMUSG00000089670	2.83629	-0.129125	0.228528	0.91905	2.83639	0.0998675	0.321525	0.635467	2.83629	-0.0600387	0.59775	0.828539	2.83629	0.032158	0.702272	0.999801	2.83641	-0.0371429	0.724584	0.879935
Mob4|ENSMUSG00000025979	4.5415	-0.020946	0.752368	0.991393	4.54143	0.00577168	0.925431	0.975424	4.54152	0.0113335	0.872761	0.958133	4.54153	-0.0307525	0.558831	0.999801	4.54153	-0.0199269	0.762205	0.89887
Rftn2|ENSMUSG00000025978	5.34286	0.00633676	0.908389	0.997217	5.3429	0.0661603	0.198772	0.500646	5.34284	0.0926466	0.111102	0.353436	5.34283	-0.024302	0.571395	0.999801	5.34285	0.0704904	0.198015	0.456058
Gm10561|ENSMUSG00000097649	2.92762	-0.0760136	0.431148	0.977718	2.92761	0.176571	0.0611873	0.251952	2.92762	0.0632852	0.534388	0.792721	2.92761	0.0357727	0.645606	0.999801	2.92762	0.102724	0.288508	0.560937
Mars2|ENSMUSG00000046994	3.607	0.0410604	0.608935	0.987824	3.60696	-0.0112462	0.881045	0.959297	3.60702	0.0711347	0.406206	0.703234	3.60702	-0.0456205	0.480099	0.999801	3.60702	0.0263257	0.740876	0.888296
Gm8292|ENSMUSG00000089944	3.04299	-0.179001	0.0731598	0.743704	3.04306	0.175089	0.0582116	0.245286	3.04296	0.00104409	0.991973	0.99727	3.04295	-0.0141577	0.849717	0.999801	3.04302	-0.00351039	0.970841	0.989834
Plcl1|ENSMUSG00000038349	5.19407	-0.0895773	0.219914	0.911513	5.19406	0.174384	0.0148192	0.0993833	5.19405	0.168229	0.0325818	0.162486	5.19404	-0.0869461	0.129867	0.999801	5.19409	0.0805996	0.261654	0.532622
Gm6644|ENSMUSG00000073674	1.95547	-0.0436179	0.725198	0.991393	1.95528	-0.00346701	0.975817	0.993572	1.95548	0.0214523	0.871238	0.957372	1.95549	-0.0793939	0.421223	0.999801	1.95539	-0.0558492	0.650072	0.841716
Satb2|ENSMUSG00000038331	1.21493	-0.43857	0.17145	0.875125	1.21467	-0.0777437	0.796919	0.927309	1.21515	-0.582393	0.106084	0.343838	1.21526	0.0638894	0.816638	0.999801	1.2158	-0.518713	0.122572	0.345808
1700066M21Rik|ENSMUSG00000038323	4.98296	-0.0266402	0.656146	0.991393	4.98292	-0.00207687	0.970168	0.991608	4.98297	-0.00692648	0.91386	0.972638	4.98298	-0.0271566	0.565984	0.999801	4.98303	-0.0352947	0.553251	0.779724
9430016H08Rik|ENSMUSG00000025971	4.16689	-0.0251979	0.726117	0.991393	4.16677	-0.108629	0.106487	0.353987	4.1669	-0.147991	0.0524181	0.221926	4.16691	0.00902525	0.875233	0.999801	4.1669	-0.13754	0.0536089	0.202607
Tyw5|ENSMUSG00000048495	3.3965	-0.01126	0.893877	0.997217	3.3964	0.0225281	0.777276	0.919185	3.39651	-0.0140263	0.875313	0.958922	3.39651	0.0197268	0.768415	0.999801	3.39647	0.00964586	0.907963	0.964825
Spats2l|ENSMUSG00000038305	4.39056	-0.0372563	0.583686	0.986469	4.39053	0.0706694	0.267252	0.581829	4.39056	0.0616149	0.397365	0.696364	4.39056	-0.0316888	0.564293	0.999801	4.39053	0.0307482	0.650061	0.841716
Kctd18|ENSMUSG00000054770	4.60518	0.0262309	0.687871	0.991393	4.60519	0.0262771	0.668075	0.869947	4.60516	0.0700373	0.314162	0.62695	4.60516	-0.0215223	0.676995	0.999801	4.60512	0.0485898	0.454251	0.709796
Sgol2|ENSMUSG00000026039	0.585539	-0.0411624	0.821257	0.994968	0.585249	-0.147302	0.387426	0.695519	0.585587	-0.176946	0.377871	0.681727	0.585597	-0.0235615	0.876607	0.999801	0.585521	-0.187786	0.307929	0.580923
Aox1|ENSMUSG00000063558	3.08317	-0.0877635	0.343919	0.968869	3.08321	0.125339	0.148773	0.42659	3.08314	0.00276822	0.977289	0.992652	3.08313	0.0305331	0.670823	0.999801	3.08314	0.0303566	0.740497	0.888122
Aox3|ENSMUSG00000064294	0.720627	0.151274	0.436311	0.977718	0.720706	-0.0194566	0.911485	0.970476	0.720614	0.0543933	0.792862	0.925294	0.720607	0.0783016	0.603875	0.999801	0.720661	0.131277	0.503351	0.748439
Aox4|ENSMUSG00000038242	-1.65622	-0.017962	0.958154	0.999477	-1.65652	-0.281299	0.352708	0.6645	-1.65619	-0.831776	0.032087	0.160761	NA	NA	NA	NA	-1.65651	-0.314499	0.363396	0.633208
Bzw1|ENSMUSG00000051223	7.32973	-0.0399702	0.37326	0.970798	7.32965	-0.0393144	0.349619	0.661916	7.32976	-0.073598	0.122232	0.372824	7.32978	-0.0111172	0.753803	0.999801	7.32981	-0.0852979	0.057008	0.211158
Clk1|ENSMUSG00000026034	7.69243	-0.0554112	0.357044	0.970269	7.69248	0.0380788	0.493296	0.771758	7.69245	-0.0773949	0.221138	0.52033	7.69246	0.0560955	0.234121	0.999801	7.69253	-0.017895	0.760729	0.897998
Ppil3|ENSMUSG00000026035	3.68941	-0.0282669	0.722835	0.991393	3.68933	0.0512808	0.485533	0.765399	3.68942	0.0280106	0.741398	0.903031	3.68943	-0.011882	0.850324	0.999801	3.68939	0.0229638	0.772948	0.905109
Nif3l1|ENSMUSG00000026036	4.07035	0.0159026	0.82875	0.994968	4.07021	-0.0341088	0.616557	0.841695	4.07037	0.0295763	0.704071	0.886953	4.07037	-0.0525268	0.366392	0.999801	4.07033	-0.0253159	0.726299	0.880431
Orc2|ENSMUSG00000026037	5.04421	0.0083424	0.886712	0.99714	5.04413	0.00500836	0.92709	0.976155	5.04423	2.53265e-05	0.999681	0.999875	5.04424	0.0089318	0.848061	0.999801	5.04423	0.00913148	0.875333	0.951125
Gm15834|ENSMUSG00000085054	-0.346629	0.500177	0.0342658	0.597761	-0.346712	-0.388731	0.068235	0.271029	-0.346654	0.0627946	0.800241	0.928529	-0.346668	0.0333431	0.852485	0.999801	-0.346753	0.09366	0.68547	0.861766
Fam126b|ENSMUSG00000038174	7.21061	0.0205062	0.64582	0.990949	7.21045	-0.179728	8.79364e-05	0.00206045	7.21066	-0.142442	0.00335024	0.0312106	7.2107	-0.020328	0.56752	0.999801	7.21067	-0.163126	0.000537969	0.00615944
Ndufb3|ENSMUSG00000026032	5.58421	-0.0391446	0.450846	0.977718	5.58412	-0.0760571	0.114697	0.370148	5.58422	-0.114262	0.03902	0.182548	5.58423	-0.00417947	0.919735	0.999801	5.58421	-0.119232	0.0209624	0.104136
Gm10068|ENSMUSG00000059647	1.30904	-0.0135025	0.926604	0.997501	1.30899	0.0526598	0.701476	0.887438	1.30905	0.166271	0.287974	0.599972	1.30906	-0.132446	0.260584	0.999801	1.30908	0.0301555	0.835769	0.934256
Cflar|ENSMUSG00000026031	3.09657	-0.0256992	0.77824	0.99203	3.09668	0.0272531	0.748241	0.907002	3.09656	-0.0936631	0.332003	0.64328	3.09655	0.092838	0.197462	0.999801	3.09666	-0.0039043	0.965409	0.987715
Casp8|ENSMUSG00000026029	1.66357	-0.114889	0.3908	0.972161	1.66365	-0.024556	0.845831	0.946248	1.66357	-0.124082	0.381285	0.685593	1.66358	-0.0146158	0.891002	0.999801	1.66372	-0.145782	0.269461	0.540756
Trak2|ENSMUSG00000026028	8.55573	0.0421126	0.347501	0.969129	8.55592	0.172742	4.93961e-05	0.00128124	8.55568	0.287997	1.23247e-07	7.93786e-06	8.55565	-0.0720068	0.0421261	0.967681	8.55575	0.211524	5.92753e-06	0.000154695
Stradb|ENSMUSG00000026027	4.56685	0.0523295	0.428611	0.977718	4.56691	0.0377854	0.539268	0.798098	4.56684	0.134779	0.0558471	0.23116	4.56684	-0.0475893	0.361426	0.999801	4.56689	0.0835696	0.204271	0.464397
G730003C15Rik|ENSMUSG00000097573	0.714594	-0.0303959	0.863986	0.996199	0.714234	-0.458876	0.00878839	0.068797	0.714633	-0.525776	0.00870289	0.0632575	0.714665	0.0266987	0.855979	0.999801	0.714503	-0.498211	0.00772792	0.0494418
Tmem237|ENSMUSG00000038079	4.12933	-0.00677719	0.925943	0.997501	4.12925	0.152316	0.0251526	0.14262	4.12933	0.14182	0.0671885	0.261311	4.12932	-0.000598677	0.991672	0.999801	4.12925	0.141666	0.0502256	0.193761
Mpp4|ENSMUSG00000079550	1.81988	-0.0631414	0.627923	0.98988	1.81987	0.209277	0.0823171	0.303195	1.81985	0.147632	0.27898	0.590908	1.81984	-0.00502814	0.960042	0.999801	1.81982	0.141901	0.267976	0.53917
Als2|ENSMUSG00000026024	5.46806	-0.00438508	0.933993	0.997501	5.46805	0.0247259	0.61609	0.841494	5.46806	0.094728	0.0926935	0.317732	5.46806	-0.077994	0.0634725	0.999801	5.46809	0.0145693	0.781793	0.909361
Cdk15|ENSMUSG00000026023	-1.08076	0.271505	0.410116	0.97686	-1.08098	-0.117238	0.694973	0.884422	-1.08078	0.169341	0.625766	0.845141	-1.0808	-0.0201461	0.934575	0.999801	-1.08095	0.152197	0.639256	0.833965
Fzd7|ENSMUSG00000041075	2.94349	-0.0988635	0.300912	0.946602	2.94356	0.287463	0.00147071	0.018632	2.94347	0.242164	0.0153895	0.0963994	2.94346	-0.0561472	0.45299	0.999801	2.94345	0.183935	0.05121	0.196362
Gm973|ENSMUSG00000047361	3.04183	0.0863242	0.376392	0.971278	3.04172	-0.118704	0.189253	0.487831	3.04185	-0.161044	0.125254	0.377597	3.04185	0.125547	0.108433	0.999801	3.04192	-0.0391503	0.685991	0.862019
Sumo1|ENSMUSG00000026021	5.71516	-0.108874	0.0327973	0.586562	5.71512	0.0453386	0.342225	0.65563	5.71517	-0.0633546	0.24316	0.548062	5.71518	-0.00671689	0.867599	0.999801	5.71521	-0.066907	0.187059	0.442147
Nop58|ENSMUSG00000026020	4.86587	-0.00288085	0.962533	0.999487	4.86578	-0.0157207	0.783818	0.922313	4.8659	-0.0409035	0.533476	0.792466	4.86592	0.0181482	0.712104	0.999801	4.86593	-0.0215342	0.7238	0.879687
Bmpr2|ENSMUSG00000067336	5.92232	0.0592758	0.276298	0.941762	5.92221	-0.121754	0.0194061	0.12001	5.92235	-0.0519685	0.372804	0.677438	5.92236	-0.0128075	0.767025	0.999801	5.92229	-0.0678492	0.209359	0.471203
Fam117b|ENSMUSG00000041040	3.95613	0.0520788	0.488296	0.980691	3.95599	-0.115643	0.0977252	0.335955	3.95617	-0.0460248	0.566926	0.811138	3.9562	-0.0227204	0.705009	0.999801	3.95613	-0.0646856	0.387244	0.655476
Ica1l|ENSMUSG00000026018	5.72769	-0.0662945	0.194138	0.896661	5.72774	0.104383	0.0281007	0.153313	5.72767	0.0586565	0.278814	0.590729	5.72766	-0.0271487	0.498303	0.999801	5.7277	0.0330445	0.514135	0.754712
Wdr12|ENSMUSG00000026019	4.67349	0.0333617	0.604588	0.987824	4.67339	-0.00180941	0.97587	0.993572	4.67351	-0.0294732	0.669082	0.86806	4.67351	0.0576297	0.260612	0.999801	4.6735	0.0245575	0.702847	0.870361
Carf|ENSMUSG00000026017	3.98315	-0.00131231	0.985969	0.999487	3.98304	-0.108807	0.11779	0.375231	3.98319	-0.124387	0.117746	0.36621	3.98321	0.00969226	0.870975	0.999801	3.98315	-0.115103	0.121467	0.343882
Nbeal1|ENSMUSG00000073664	4.8872	0.0364852	0.589298	0.987824	4.8872	-0.0732632	0.245791	0.558591	4.88721	-0.0265262	0.712786	0.89007	4.88722	-0.0118887	0.822832	0.999801	4.88727	-0.0441812	0.510978	0.752729
Cyp20a1|ENSMUSG00000049439	3.69448	-0.013458	0.866922	0.996633	3.69443	0.0946029	0.208971	0.513446	3.69447	0.0985765	0.242784	0.547581	3.69446	-0.0217579	0.727044	0.999801	3.69446	0.075066	0.345917	0.616012
Abi2|ENSMUSG00000026782	8.13648	-0.0577582	0.197829	0.896661	8.13646	0.00587382	0.88865	0.961534	8.13648	-0.0254081	0.59301	0.825034	8.13649	-0.0327335	0.351935	0.999801	8.13654	-0.0579204	0.194821	0.451392
Raph1|ENSMUSG00000026014	2.87208	0.192202	0.045371	0.648011	2.8721	-0.0689442	0.439849	0.735281	2.87208	0.136408	0.183938	0.468609	2.87209	-0.0146882	0.84733	0.999801	2.87211	0.116467	0.22163	0.485461
Gm11578|ENSMUSG00000082160	1.96933	0.0306602	0.805327	0.994794	1.96935	0.118215	0.301105	0.615668	1.96932	-0.00202681	0.987718	0.996189	1.96931	0.147195	0.131839	0.999801	1.96936	0.133202	0.27656	0.548118
Eif4a-ps4|ENSMUSG00000082209	7.41132	-0.0515934	0.249933	0.930311	7.41122	0.0352989	0.401063	0.704969	7.41134	-0.0477711	0.315617	0.627979	7.41135	0.026007	0.462551	0.999801	7.41135	-0.0224542	0.615459	0.820324
Rpl18-ps1|ENSMUSG00000081382	0.945201	0.0225744	0.891184	0.997217	0.945095	0.0295493	0.845568	0.946248	0.945192	0.289709	0.101202	0.334649	0.94519	-0.248909	0.0539771	0.996196	0.945032	0.0567023	0.730925	0.883061
Pard3b|ENSMUSG00000052062	2.06814	0.0472458	0.692893	0.991393	2.06819	-0.0491611	0.658659	0.865001	2.06813	-0.0509514	0.68849	0.8786	2.06814	0.0460383	0.627993	0.999801	2.06821	-0.00290443	0.980564	0.993537
Nrp2|ENSMUSG00000025969	2.51128	0.0134015	0.898443	0.997217	2.51124	-0.162251	0.0991914	0.338287	2.51128	-0.110511	0.321383	0.633338	2.51128	-0.0443502	0.598472	0.999801	2.51125	-0.150519	0.147126	0.385264
Ino80d|ENSMUSG00000040865	6.18431	0.040613	0.395817	0.972965	6.18434	0.0100504	0.822806	0.937537	6.18432	0.0231128	0.648031	0.858033	6.18432	0.024133	0.521754	0.999801	6.18437	0.0457316	0.335313	0.607024
Gm11602|ENSMUSG00000084799	1.36699	-0.0174837	0.905005	0.997217	1.36701	-0.0599533	0.6593	0.865204	1.36699	0.0486797	0.75787	0.910857	1.36699	-0.133954	0.247176	0.999801	1.36698	-0.0795387	0.58702	0.803161
Ndufs1|ENSMUSG00000025968	7.49993	0.00388001	0.930924	0.997501	7.49975	-0.104264	0.0126515	0.0891052	7.49996	-0.126569	0.00761761	0.0575927	7.49998	0.0212791	0.549687	0.999801	7.49991	-0.104741	0.0186916	0.0956917
Eef1b2|ENSMUSG00000025967	7.14257	-0.0119432	0.791167	0.994794	7.14252	0.0481134	0.252212	0.566036	7.14257	0.0121039	0.80021	0.928529	7.14257	0.0189443	0.593199	0.999801	7.14255	0.0334072	0.458165	0.712117
Gpr1|ENSMUSG00000046856	-0.695988	0.629688	0.0110376	0.406117	-0.696062	-0.691514	0.00275523	0.0297119	-0.695954	0.349001	0.193413	0.482321	-0.695928	-0.41184	0.0393014	0.95377	-0.695924	-0.0701012	0.778438	0.907603
Zdbf2|ENSMUSG00000027520	6.11451	0.0452192	0.492597	0.982104	6.11467	0.0889118	0.167069	0.454336	6.11453	0.19952	0.00674521	0.0525029	6.11454	-0.0692602	0.194064	0.999801	6.11469	0.136806	0.0430101	0.173851
Gm11605|ENSMUSG00000081643	2.90277	-0.0499052	0.600491	0.987824	2.90271	0.0204596	0.81844	0.935866	2.90278	-0.109345	0.280703	0.592435	2.90279	0.0760041	0.317795	0.999801	2.9028	-0.0371107	0.695496	0.867544
Adam23|ENSMUSG00000025964	8.09646	-0.0315024	0.482796	0.978767	8.09653	0.0152841	0.715517	0.893834	8.09645	-0.00767181	0.872147	0.957735	8.09646	-0.0130448	0.711963	0.999801	8.09652	-0.0206846	0.643803	0.837265
Mdh1b|ENSMUSG00000025963	-0.0750352	0.471912	0.0289439	0.564358	-0.0749828	0.174131	0.366196	0.677302	-0.0750322	0.649884	0.00590351	0.0475719	-0.0750549	-0.0127735	0.940001	0.999801	-0.0750143	0.641346	0.00278146	0.0224061
Fastkd2|ENSMUSG00000025962	4.4069	-0.0450392	0.51147	0.984789	4.40693	0.107266	0.0927736	0.325115	4.40689	0.0282271	0.69808	0.883011	4.40689	0.0315016	0.559837	0.999801	4.40691	0.0566342	0.40441	0.670512
Klf7|ENSMUSG00000025959	5.88949	-0.0218209	0.660893	0.991393	5.88938	-0.0371256	0.42412	0.722645	5.88952	-0.045787	0.383438	0.687314	5.88954	-0.0188766	0.629343	0.999801	5.88953	-0.0647622	0.187762	0.442721
Creb1|ENSMUSG00000025958	6.2221	-0.00398283	0.932952	0.997501	6.22204	0.0504455	0.255916	0.56957	6.22212	0.0722852	0.152007	0.423652	6.22213	-0.0297047	0.431606	0.999801	6.22212	0.0427846	0.362968	0.632861
Mettl21a|ENSMUSG00000025956	3.80066	-0.0399884	0.606906	0.987824	3.8006	0.0437851	0.543462	0.800855	3.80067	-0.0327866	0.691142	0.879559	3.80068	0.0345348	0.574922	0.999801	3.80066	-0.00082308	0.991504	0.997011
Ccnyl1|ENSMUSG00000070871	4.55061	-0.0034259	0.958958	0.999487	4.55066	-0.0403675	0.515588	0.785995	4.55062	-0.00482294	0.945685	0.983242	4.55063	-0.0427969	0.412641	0.999801	4.55069	-0.0478132	0.468703	0.719857
2810408I11Rik|ENSMUSG00000087213	-0.737759	-0.194345	0.430111	0.977718	-0.737902	-0.345091	0.130368	0.396929	-0.737737	-0.361125	0.169539	0.449063	-0.737713	-0.18126	0.381253	0.999801	-0.737788	-0.541733	0.02502	0.118277
Fzd5|ENSMUSG00000045005	2.92985	0.00488719	0.963904	0.999487	2.92967	-0.209957	0.0407758	0.196204	2.92988	-0.189193	0.103824	0.339268	2.92989	-0.0165662	0.846324	0.999801	2.92978	-0.216442	0.0486103	0.189454
Plekhm3|ENSMUSG00000051344	6.1076	0.141311	0.00311743	0.228487	6.1075	-0.176602	8.49745e-05	0.00199923	6.10763	-0.0279485	0.581649	0.818741	6.10765	-0.00840048	0.82624	0.999801	6.10763	-0.0407702	0.390678	0.658929
Rpl10a-ps1|ENSMUSG00000084416	5.81004	-0.035829	0.477963	0.978767	5.80996	0.0493676	0.293093	0.607882	5.81003	-0.0202267	0.705364	0.887181	5.81003	0.02907	0.461971	0.999801	5.80997	0.0109232	0.827819	0.929937
D630023F18Rik|ENSMUSG00000044816	0.715931	0.354371	0.0618001	0.713398	0.716068	1.19944	9.83697e-09	1.21547e-06	0.715785	1.66734	1.52444e-10	3.39178e-08	0.715688	-0.117962	0.380106	0.999801	0.715353	1.56524	1.80007e-10	2.90287e-08
Idh1|ENSMUSG00000025950	5.31879	0.011897	0.829603	0.994968	5.31883	0.176941	0.000627331	0.00963722	5.31876	0.196408	0.000781976	0.0100577	5.31875	-0.0111068	0.797646	0.999801	5.31873	0.185235	0.000735249	0.00784496
Pikfyve|ENSMUSG00000025949	5.44561	0.10203	0.0555213	0.692058	5.44551	-0.0725263	0.145326	0.422045	5.44564	0.0122617	0.828885	0.9412	5.44566	0.0133979	0.75265	0.999801	5.44564	0.0234009	0.658478	0.847334
Map2|ENSMUSG00000015222	9.57195	0.0755595	0.103911	0.814699	9.57195	-0.0547591	0.202881	0.506391	9.57196	-0.059539	0.226491	0.527236	9.57197	0.0779179	0.0371289	0.949923	9.57197	0.0145119	0.753182	0.8944
Unc80|ENSMUSG00000055567	7.89569	0.0496025	0.265378	0.937983	7.89566	-0.169976	0.000168334	0.00342068	7.89572	-0.138208	0.00475665	0.0405831	7.89574	0.0163549	0.642929	0.999801	7.89576	-0.125687	0.00571932	0.0395015
Rpe|ENSMUSG00000026005	5.22256	-0.0748988	0.185712	0.891073	5.22248	-0.0184879	0.724436	0.897177	5.22258	-0.0623382	0.300013	0.612768	5.2226	-0.0369134	0.40749	0.999801	5.22259	-0.0994833	0.0762145	0.255203
Gm15789|ENSMUSG00000082057	-1.77874	0.358343	0.384281	0.971829	-1.77873	0.0921796	0.805334	0.930651	-1.77877	0.555345	0.193698	0.482751	-1.77879	-0.117416	0.698551	0.999801	-1.77881	0.438018	0.270519	0.542307
Kansl1l|ENSMUSG00000026004	4.48335	0.0504419	0.451073	0.977718	4.48341	-0.0197146	0.754838	0.910161	4.48335	0.110812	0.119687	0.368924	4.48335	-0.0834887	0.116285	0.999801	4.4834	0.0319732	0.630429	0.829202
Acadl|ENSMUSG00000026003	5.45592	0.000239831	0.996415	0.999917	5.45592	0.103256	0.0386128	0.189106	5.4559	0.0488319	0.38841	0.68963	5.4559	0.0514668	0.22149	0.999801	5.45593	0.10047	0.0584259	0.214178
Lancl1|ENSMUSG00000026000	7.48061	-0.00673546	0.880642	0.996828	7.48055	-0.0735164	0.0788518	0.294857	7.48063	-0.081019	0.0889627	0.31003	7.48064	-0.00407208	0.908301	0.999801	7.48065	-0.0862897	0.0537111	0.202859
Erbb4|ENSMUSG00000062209	6.24403	0.0744401	0.115751	0.837616	6.24404	0.0255229	0.56578	0.81447	6.24404	0.119254	0.017751	0.106705	6.24404	-0.0234549	0.53029	0.999801	6.24406	0.098349	0.0370862	0.156919
Ikzf2|ENSMUSG00000025997	2.15192	0.0102533	0.930665	0.997501	2.15181	0.336198	0.00251185	0.0276191	2.15193	0.280921	0.0247921	0.134923	2.15192	0.0614012	0.512108	0.999801	2.15186	0.344316	0.00346063	0.026575
Spag16|ENSMUSG00000053153	-0.621287	-0.077704	0.811195	0.994968	-0.622024	-0.138416	0.618905	0.842952	-0.621178	-0.241586	0.512779	0.779428	-0.621178	-0.00267384	0.985043	0.999801	-0.621526	-0.235346	0.477638	0.727558
Vwc2l|ENSMUSG00000045648	1.17153	0.0474624	0.766691	0.991393	1.17153	-0.243777	0.102445	0.345338	1.17154	-0.250418	0.146751	0.41508	1.17155	0.0578083	0.643926	0.999801	1.17158	-0.200441	0.214994	0.477039
Bard1|ENSMUSG00000026196	-0.391848	0.170191	0.564093	0.984789	-0.391697	-0.311618	0.249638	0.562949	-0.391833	-0.346123	0.273269	0.583813	-0.391842	0.208866	0.367255	0.999801	-0.391719	-0.144326	0.617655	0.821714
Atic|ENSMUSG00000026192	4.87806	0.025628	0.676693	0.991393	4.87806	0.206278	0.000315573	0.0056282	4.87804	0.20443	0.00175082	0.0190808	4.87803	0.0242678	0.61643	0.999801	4.87801	0.223796	0.000252543	0.0033442
Fn1|ENSMUSG00000026193	5.06176	0.102716	0.181958	0.887218	5.06182	-0.0839313	0.235533	0.546401	5.06174	-0.0234993	0.769227	0.915738	5.06175	0.0417189	0.486505	0.999801	5.06176	0.00910148	0.903343	0.962402
Mreg|ENSMUSG00000039395	0.303804	0.125512	0.528683	0.984789	0.303757	0.280032	0.141943	0.416051	0.3038	0.388165	0.0743803	0.279129	0.303786	0.0199809	0.898084	0.999801	0.303909	0.405891	0.0445652	0.17824
D230017M19Rik|ENSMUSG00000097131	2.23194	0.14498	0.207129	0.90156	2.23191	-0.0954217	0.366421	0.677425	2.23195	0.0190077	0.877215	0.959112	2.23196	0.029551	0.743475	0.999801	2.23199	0.0448715	0.695927	0.867637
Pecr|ENSMUSG00000026189	2.10239	0.0959214	0.417213	0.977718	2.10224	0.0176118	0.872961	0.95709	2.10239	0.144776	0.252363	0.559863	2.10238	-0.0352459	0.709761	0.999801	2.10216	0.118722	0.315163	0.587695
Tmem169|ENSMUSG00000026188	1.23032	0.057124	0.74175	0.991393	1.23037	0.148475	0.36575	0.677111	1.23031	0.188272	0.319758	0.631772	1.2303	0.0186366	0.894394	0.999801	1.23015	0.210617	0.236583	0.503944
Xrcc5|ENSMUSG00000026187	4.66633	0.107448	0.0944922	0.799225	4.66624	0.0161012	0.788736	0.924619	4.66635	-0.0222006	0.745561	0.905241	4.66635	0.142619	0.00543091	0.502787	4.66627	0.119403	0.0628639	0.224498
March4|ENSMUSG00000039372	5.46052	-0.0993183	0.0612501	0.711687	5.46071	0.0582424	0.240863	0.552731	5.46049	0.108638	0.054496	0.227325	5.46048	-0.153616	0.000344197	0.187394	5.4606	-0.0439425	0.404319	0.670512
Smarcal1|ENSMUSG00000039354	5.93333	-0.0655504	0.182517	0.888378	5.93333	-0.046518	0.311351	0.62564	5.93333	-0.0704465	0.178324	0.461203	5.93335	-0.0454192	0.243009	0.999801	5.93334	-0.116497	0.0169867	0.0892352
Rpl37a|ENSMUSG00000046330	4.86241	-0.0270623	0.660681	0.991393	4.86239	0.0382597	0.505845	0.779673	4.8624	-0.0085032	0.896675	0.966951	4.86239	0.0149937	0.758101	0.999801	4.8624	0.00840795	0.891002	0.957009
Igfbp2|ENSMUSG00000039323	1.74385	-0.178642	0.373371	0.970798	1.74391	0.0134949	0.942304	0.981787	1.7438	-0.298397	0.164103	0.441154	1.7438	0.130269	0.412898	0.999801	1.74377	-0.150507	0.445876	0.702583
Igfbp5|ENSMUSG00000026185	6.9959	0.00517064	0.942597	0.99807	6.99581	-0.182484	0.0109508	0.0806521	6.99592	-0.163626	0.0356543	0.172356	6.99593	-0.0194306	0.731038	0.999801	6.99592	-0.178148	0.0171019	0.0895821
Tns1|ENSMUSG00000055322	6.12882	-0.160812	0.000752331	0.121643	6.12897	-0.0221008	0.621067	0.844065	6.1288	-0.208947	5.90257e-05	0.0012768	6.12881	0.0240694	0.529543	0.999801	6.12895	-0.182901	0.000120635	0.00183139
Arpc2|ENSMUSG00000006304	7.61208	-0.0103222	0.818236	0.994968	7.61202	-0.0719068	0.0860191	0.3115	7.6121	-0.112931	0.0174863	0.105421	7.61212	0.0262316	0.458562	0.999801	7.61215	-0.0886118	0.0474849	0.186471
Aamp|ENSMUSG00000006299	7.02984	-0.0281113	0.532971	0.984789	7.0298	0.0401835	0.341891	0.65537	7.02984	0.0225167	0.637147	0.852049	7.02984	-0.013347	0.707438	0.999801	7.02982	0.00651343	0.884686	0.954084
Pnkd|ENSMUSG00000026179	7.09023	0.0614254	0.169598	0.87426	7.09032	0.0773516	0.0659153	0.265128	7.0902	0.141901	0.00279445	0.027218	7.09019	-0.00378265	0.91516	0.999801	7.09023	0.13501	0.00246384	0.0204649
Tmbim1|ENSMUSG00000006301	5.8355	-0.0379248	0.451888	0.977718	5.83552	0.0458417	0.344569	0.657753	5.83549	0.044454	0.404398	0.701726	5.83548	-0.0405791	0.306622	0.999801	5.8356	0.0015818	0.974685	0.991447
Gm216|ENSMUSG00000073650	-0.016889	0.04029	0.850162	0.995593	-0.0171954	0.089152	0.646675	0.858717	-0.0168845	0.274548	0.225651	0.526185	-0.0168997	-0.155058	0.361329	0.999801	-0.0171662	0.128139	0.544661	0.774449
Slc11a1|ENSMUSG00000026177	1.61035	-0.0388841	0.77979	0.99217	1.61047	-0.00900608	0.943473	0.982041	1.61032	0.0433449	0.770247	0.916261	1.6103	-0.0942991	0.377205	0.999801	1.61039	-0.0557102	0.691102	0.864649
Ctdsp1|ENSMUSG00000026176	4.60629	-0.000753117	0.990884	0.999487	4.60632	0.0434141	0.479025	0.761218	4.60627	0.0228815	0.742811	0.903439	4.60626	0.0178208	0.727984	0.999801	4.60625	0.0359834	0.584594	0.80156
Vil1|ENSMUSG00000026175	-0.0326728	-0.213798	0.32169	0.95794	-0.0325226	0.199588	0.313045	0.626558	-0.032707	-0.0699366	0.75621	0.910208	-0.0327206	0.0554999	0.73471	0.999801	-0.0325366	-0.0206352	0.921669	0.970445
Rqcd1|ENSMUSG00000026174	4.88909	0.0268745	0.659014	0.991393	4.88907	-0.0114701	0.840941	0.944329	4.88911	0.020583	0.750791	0.908051	4.88912	-0.00967161	0.842356	0.999801	4.88915	0.0119439	0.843147	0.937323
Plcd4|ENSMUSG00000026173	4.1188	0.0274354	0.736441	0.991393	4.11888	0.0314105	0.680583	0.875713	4.11879	0.0187578	0.82771	0.940777	4.11878	0.043258	0.509299	0.999801	4.11892	0.0514008	0.51954	0.758414
Usp37|ENSMUSG00000033364	5.07719	0.0800321	0.168643	0.87426	5.07719	-0.0353203	0.516594	0.786779	5.07722	0.0166368	0.788615	0.923839	5.07723	0.0265041	0.567651	0.999801	5.07731	0.0414675	0.474078	0.724986
Zfp142|ENSMUSG00000026135	5.46636	0.0538933	0.30849	0.949368	5.46638	-0.109717	0.0266489	0.148073	5.46638	-0.0525739	0.349299	0.657151	5.46639	-0.00484452	0.908331	0.999801	5.46646	-0.0612277	0.243735	0.51255
Bcs1l|ENSMUSG00000026172	4.07748	0.0070813	0.923587	0.997501	4.07746	-0.150587	0.0271194	0.149815	4.07749	-0.0677594	0.388088	0.689419	4.07751	-0.0782744	0.175534	0.999801	4.07753	-0.151372	0.03916	0.162983
Rnf25|ENSMUSG00000026171	4.75272	0.0461927	0.463146	0.978767	4.75274	0.0923161	0.119561	0.378588	4.7527	0.117184	0.0800735	0.291752	4.75269	0.0212278	0.671725	0.999801	4.7527	0.135094	0.0303908	0.136048
Stk36|ENSMUSG00000033276	2.44914	0.114399	0.305744	0.949368	2.44916	0.278806	0.0097821	0.0743725	2.44912	0.141309	0.235929	0.538781	2.44909	0.25421	0.00607995	0.528814	2.44904	0.391076	0.00103805	0.01038
Ttll4|ENSMUSG00000033257	3.95449	-0.0137264	0.855598	0.996047	3.95446	-0.189346	0.00730768	0.0606032	3.95451	-0.176707	0.0269566	0.143112	3.95453	-0.0297971	0.618182	0.999801	3.9546	-0.207503	0.00535128	0.037613
Cyp27a1|ENSMUSG00000026170	2.90442	-0.136447	0.230055	0.92081	2.90437	0.27384	0.0138846	0.0948949	2.90439	0.124348	0.28903	0.601141	2.90438	0.00498845	0.953737	0.999801	2.9044	0.139036	0.210409	0.472012
Wnt10a|ENSMUSG00000026167	-0.456332	0.178425	0.460762	0.978767	-0.456473	0.01769	0.936075	0.9797	-0.456305	-0.192015	0.461342	0.74507	-0.4563	0.385043	0.0564174	0.996196	-0.456376	0.193616	0.426036	0.687344
Cdk5r2|ENSMUSG00000090071	7.70822	-0.0755944	0.181195	0.884505	7.70829	-0.028293	0.588386	0.828797	7.70821	-0.0997581	0.0972356	0.327533	7.70823	-0.00758623	0.863644	0.999801	7.70831	-0.112794	0.0498211	0.192796
Ccdc108|ENSMUSG00000047021	1.65685	0.603713	0.00195185	0.182802	1.65646	0.505035	0.00286143	0.0306391	1.65688	0.530693	0.00859984	0.0626147	1.65682	0.566101	0.000202317	0.159427	1.65649	1.10461	5.86129e-07	2.2566e-05
Ihh|ENSMUSG00000006538	-1.69668	-0.138702	0.741746	0.991393	-1.69682	0.132723	0.737824	0.9029	-1.69667	-0.256399	0.556738	0.805557	-1.69666	0.255627	0.437476	0.999801	-1.69674	-0.00408524	0.991956	0.99702
Nhej1|ENSMUSG00000026162	1.22853	-0.228249	0.127364	0.846816	1.22842	-0.180213	0.197255	0.498141	1.22855	-0.388054	0.0156431	0.097667	1.22859	-0.0280489	0.816079	0.999801	1.22858	-0.40251	0.006574	0.043726
Cnppd1|ENSMUSG00000033159	5.0567	-0.0844863	0.151473	0.863351	5.05666	-0.147684	0.00690037	0.0580097	5.05672	-0.257243	5.3713e-05	0.00119047	5.05674	0.0213244	0.645067	0.999801	5.05679	-0.236866	7.73841e-05	0.00127315
Fam134a|ENSMUSG00000049339	7.43214	-0.0723553	0.105551	0.818566	7.43212	-0.0708479	0.0900414	0.320037	7.43215	-0.135016	0.00437469	0.038135	7.43217	-0.011835	0.738468	0.999801	7.43222	-0.149242	0.000772295	0.00814412
Zfand2b|ENSMUSG00000026197	3.46084	0.0356749	0.670062	0.991393	3.46085	-0.0284841	0.715186	0.893834	3.46084	-0.0660227	0.456098	0.741675	3.46084	0.0708241	0.282438	0.999801	3.46087	0.00343683	0.966874	0.988088
Abcb6|ENSMUSG00000026198	4.29007	0.0496598	0.479681	0.978767	4.2901	0.134202	0.0426443	0.202106	4.29005	0.157932	0.0339971	0.167512	4.29004	0.0245132	0.659331	0.999801	4.29008	0.177932	0.0111184	0.0654244
Atg9a|ENSMUSG00000033124	6.94099	0.0133152	0.768421	0.9915	6.94093	-0.206019	9.76533e-07	5.1134e-05	6.94103	-0.208678	1.28591e-05	0.000368399	6.94106	0.0128326	0.719599	0.999801	6.94111	-0.199336	8.73917e-06	0.000215878
Ankzf1|ENSMUSG00000026199	4.63232	0.0546484	0.399705	0.975343	4.63234	-0.0809949	0.182015	0.477486	4.63231	-0.079658	0.245049	0.549788	4.63232	0.0510971	0.31878	0.999801	4.63236	-0.0309285	0.6306	0.82931
Glb1l|ENSMUSG00000026200	3.21998	-0.0352689	0.690866	0.991393	3.2201	0.110222	0.182403	0.477986	3.21995	-0.0212337	0.819583	0.936957	3.21993	0.0910958	0.187623	0.999801	3.21996	0.0745578	0.394671	0.661877
Stk16|ENSMUSG00000026201	5.02058	0.0450827	0.449067	0.977718	5.02061	0.0356715	0.516949	0.786889	5.02057	0.0125514	0.842453	0.946833	5.02056	0.0660304	0.157404	0.999801	5.02057	0.0743036	0.209306	0.471203
Tuba4a|ENSMUSG00000026202	8.55701	-0.156896	0.00091325	0.131531	8.55695	-0.131735	0.00243205	0.0270752	8.55703	-0.219556	3.30824e-05	0.000807361	8.55706	-0.0732385	0.0400093	0.965866	8.55714	-0.296294	1.18726e-07	6.20645e-06
Dnajb2|ENSMUSG00000026203	5.22304	-0.0417175	0.456888	0.978545	5.22295	-0.074091	0.161941	0.446582	5.22305	-0.0814697	0.16891	0.44823	5.22306	-0.0372604	0.400857	0.999801	5.22307	-0.120984	0.0299047	0.134543
Ptprn|ENSMUSG00000026204	8.8765	-0.0134197	0.766241	0.991393	8.87649	-0.0208706	0.623015	0.845271	8.8765	0.00678943	0.887454	0.962759	8.8765	-0.0438193	0.221017	0.999801	8.8765	-0.0420449	0.352436	0.622461
Resp18|ENSMUSG00000033061	4.15878	-0.00189352	0.980067	0.999487	4.15897	0.107694	0.132755	0.40132	4.15874	0.159387	0.0551889	0.229202	4.15872	-0.0503715	0.405561	0.999801	4.15891	0.10254	0.176158	0.42743
Dnpep|ENSMUSG00000026209	5.43317	-0.107299	0.0467417	0.65612	5.43315	0.00309616	0.950696	0.984873	5.43316	-0.116182	0.0412253	0.189045	5.43317	0.00890139	0.833172	0.999801	5.43321	-0.111608	0.0371389	0.157064
Des|ENSMUSG00000026208	0.648238	0.147921	0.430544	0.977718	0.648263	-0.104086	0.542012	0.799952	0.648233	0.0653501	0.74753	0.906283	0.648221	-0.0285041	0.846742	0.999801	0.648241	0.0446115	0.811845	0.922902
Speg|ENSMUSG00000026207	7.46167	0.00969105	0.828058	0.994968	7.46182	-0.113346	0.00684211	0.0576894	7.46166	-0.163693	0.00064788	0.00876518	7.46167	0.0598197	0.0930645	0.999801	7.4618	-0.109698	0.0132906	0.0746108
Gmppa|ENSMUSG00000033021	4.50035	-0.0623759	0.352663	0.970269	4.50038	0.0460269	0.467966	0.753688	4.50033	-0.0472364	0.505385	0.775148	4.50033	0.0288515	0.584993	0.999801	4.50034	-0.0194391	0.770381	0.903402
Asic4|ENSMUSG00000033007	6.93009	-0.08178	0.0884184	0.786668	6.93014	-0.070595	0.117605	0.374951	6.93008	-0.129049	0.0137594	0.0891212	6.9301	-0.0255644	0.493747	0.999801	6.93013	-0.157545	0.00192658	0.0168714
Chpf|ENSMUSG00000032997	6.04558	-0.000971081	0.983954	0.999487	6.04567	0.0292774	0.525191	0.79159	6.04555	0.0664034	0.199903	0.492596	6.04554	-0.0392773	0.316957	0.999801	6.04557	0.0203107	0.67633	0.857108
Tmem198|ENSMUSG00000051703	5.26071	0.00284367	0.959418	0.999487	5.26078	-0.0311333	0.549761	0.803756	5.2607	-0.0454232	0.443479	0.734005	5.26071	0.0173785	0.694364	0.999801	5.26081	-0.036093	0.517382	0.756749
Obsl1|ENSMUSG00000026211	3.08651	0.0771605	0.391268	0.972161	3.08652	-0.295131	0.000476629	0.00779629	3.08652	-0.233894	0.0147298	0.0934288	3.08655	0.0178296	0.806176	0.999801	3.08654	-0.220532	0.014013	0.0774201
Inha|ENSMUSG00000032968	4.04322	0.0453846	0.537095	0.984789	4.04323	-0.156578	0.0238005	0.137122	4.04321	-0.16763	0.0317175	0.159702	4.04322	0.057016	0.332497	0.999801	4.04318	-0.115399	0.112478	0.328611
Stk11ip|ENSMUSG00000026213	4.99278	0.0386091	0.517233	0.984789	4.99277	0.00601069	0.914656	0.971937	4.99277	0.0493328	0.434377	0.727514	4.99278	-0.00669033	0.886931	0.999801	4.99281	0.0378416	0.523344	0.760977
Slc4a3|ENSMUSG00000006576	7.37714	0.0258641	0.562416	0.984789	7.3772	-0.0424202	0.314882	0.62863	7.37711	0.0105498	0.823331	0.938213	7.37711	-0.0274771	0.437059	0.999801	7.37706	-0.0203372	0.647686	0.839963
Epha4|ENSMUSG00000026235	8.1065	-0.0174775	0.694395	0.991393	8.10632	-0.17807	1.77e-05	0.000565051	8.10654	-0.171085	0.000296937	0.00476322	8.10657	-0.0300713	0.39497	0.999801	8.1065	-0.199371	6.89986e-06	0.00017763
Sgpp2|ENSMUSG00000032908	5.50115	-0.0725348	0.271063	0.939125	5.50092	-0.244024	0.000249221	0.00466072	5.50121	-0.346442	1.80997e-05	0.000486026	5.50124	0.0238413	0.643675	0.999801	5.50129	-0.322967	1.85392e-05	0.000403706
Farsb|ENSMUSG00000026245	5.67854	0.0111383	0.828836	0.994968	5.67843	0.0649426	0.175503	0.467618	5.67855	0.0414744	0.447936	0.736401	5.67855	0.0302997	0.454808	0.999801	5.67851	0.0689595	0.178861	0.431052
BC035947|ENSMUSG00000090486	-1.19671	0.262974	0.44194	0.977718	-1.19665	-0.355618	0.269259	0.584568	-1.19673	0.424462	0.253672	0.561342	-1.19674	-0.505832	0.0684691	0.999801	-1.1966	-0.0981983	0.777256	0.906945
Acsl3|ENSMUSG00000032883	7.89323	-0.0281263	0.612302	0.987824	7.89326	0.0120189	0.815338	0.934639	7.89322	-0.0241978	0.681999	0.875088	7.89322	0.00354148	0.936263	0.999801	7.89328	-0.0164733	0.764404	0.900097
Utp14b|ENSMUSG00000079470	4.13503	0.0712535	0.482044	0.978767	4.13521	-0.0889514	0.354869	0.666946	4.13506	-0.0505494	0.637912	0.85254	4.13507	0.0321334	0.697344	0.999801	4.13535	-0.0252127	0.802176	0.918938
Kcne4|ENSMUSG00000047330	0.178592	-0.176488	0.535865	0.984789	0.178528	0.292296	0.268776	0.583667	0.178594	0.102423	0.729579	0.898056	0.17861	-0.00906039	0.966281	0.999801	0.178602	0.105706	0.707066	0.871642
Gm5830|ENSMUSG00000072978	1.64703	0.00406898	0.975979	0.999487	1.64703	-0.116724	0.354993	0.666996	1.64702	-0.0404673	0.778284	0.919492	1.64703	-0.0784689	0.462481	0.999801	1.64706	-0.113905	0.396149	0.663183
Scg2|ENSMUSG00000050711	8.79883	0.14546	0.039091	0.616534	8.79876	0.0548475	0.394553	0.70173	8.79884	0.119143	0.10824	0.347781	8.79883	0.077411	0.164544	0.999801	8.79882	0.193519	0.00726041	0.0472723
Ap1s3|ENSMUSG00000054702	2.09305	0.226766	0.0987225	0.808427	2.09348	1.01715	3.50492e-09	5.47245e-07	2.09291	1.18522	1.52216e-09	2.30776e-07	2.09282	0.0605012	0.541246	0.999801	2.09295	1.22903	1.66916e-10	2.77016e-08
Wdfy1|ENSMUSG00000073643	5.12603	-0.393082	0.0738612	0.748172	5.12622	0.129521	0.518909	0.78823	5.12604	-0.592071	0.013577	0.0884078	5.12606	0.32245	0.0631505	0.999801	5.1265	-0.251506	0.247486	0.517147
Mrpl44|ENSMUSG00000026248	4.47843	-0.0382149	0.568459	0.984789	4.4784	-0.131821	0.035807	0.179926	4.47846	-0.186958	0.00867009	0.0630726	4.47847	0.0164568	0.759192	0.999801	4.47855	-0.174876	0.00864279	0.0539484
Serpine2|ENSMUSG00000026249	8.47913	0.0169435	0.70666	0.991393	8.47911	-0.0109488	0.795482	0.926634	8.47913	-0.0270031	0.571349	0.813257	8.47913	0.0304687	0.392382	0.999801	8.47915	-0.00123414	0.97813	0.992813
Gm5529|ENSMUSG00000067106	3.46503	-0.0766486	0.356327	0.970269	3.46489	-0.081316	0.294456	0.609627	3.46507	-0.142922	0.107653	0.346611	3.4651	-0.0180958	0.784992	0.999801	3.46509	-0.1621	0.0509396	0.195765
Cul3|ENSMUSG00000004364	7.47747	-0.0495976	0.26661	0.938319	7.47739	-0.0250144	0.550943	0.804221	7.47748	-0.0270131	0.56885	0.81179	7.4775	-0.0525739	0.138204	0.999801	7.4775	-0.0797358	0.0730572	0.247687
Dock10|ENSMUSG00000038608	6.87803	-0.0474072	0.294122	0.943662	6.87801	0.0114124	0.788391	0.924619	6.87803	0.00984858	0.836954	0.944703	6.87804	-0.0504776	0.156899	0.999801	6.87801	-0.0380833	0.397551	0.664036
Nyap2|ENSMUSG00000054976	5.76398	0.0734866	0.343647	0.968869	5.76382	-0.000727013	0.991981	0.997653	5.76402	0.00898124	0.913347	0.972523	5.76403	0.0604488	0.330896	0.999801	5.76396	0.0677281	0.382705	0.65159
Gm5530|ENSMUSG00000087008	-1.38943	0.0776839	0.865655	0.996307	-1.38955	0.25946	0.550473	0.804096	-1.38947	0.485793	0.299628	0.612411	-1.3895	-0.147613	0.656785	0.999801	-1.3895	0.328651	0.464613	0.716601
Irs1|ENSMUSG00000055980	3.21213	0.033402	0.702069	0.991393	3.21213	-0.0184306	0.822388	0.937509	3.21216	-0.0397308	0.667748	0.866918	3.21217	0.0513725	0.463626	0.999801	3.21228	0.00983989	0.909284	0.965303
Rhbdd1|ENSMUSG00000026142	3.23031	-0.091861	0.2992	0.945186	3.23024	0.0706137	0.39669	0.70261	3.23029	-0.100896	0.280565	0.592435	3.2303	0.074591	0.284534	0.999801	3.23025	-0.0207874	0.812015	0.922903
Col4a4|ENSMUSG00000067158	-1.66648	-0.358729	0.269756	0.938956	-1.66644	0.459879	0.135337	0.405374	-1.66648	-0.012723	0.972329	0.990836	-1.66647	0.117697	0.633921	0.999801	-1.66644	0.0596288	0.843126	0.937323
Col4a3|ENSMUSG00000079465	-1.71979	0.0516796	0.88219	0.996828	-1.71998	-0.674967	0.052706	0.230689	-1.71977	-0.268765	0.475344	0.753758	-1.71975	-0.358734	0.219511	0.999801	-1.71978	-0.631657	0.0759856	0.254486
Mff|ENSMUSG00000026150	6.75767	-0.00344995	0.939648	0.997588	6.75759	-0.0401735	0.346557	0.659734	6.75769	-0.0466896	0.334832	0.644996	6.7577	-0.000836996	0.981524	0.999801	6.75768	-0.0488746	0.281624	0.552835
Agfg1|ENSMUSG00000026159	5.88924	-0.0169537	0.731014	0.991393	5.88922	0.0684321	0.140024	0.413359	5.88925	0.0432796	0.408815	0.705382	5.88925	0.00565515	0.885566	0.999801	5.88929	0.0465258	0.342349	0.613187
Slc19a3|ENSMUSG00000038496	2.23791	0.0995286	0.472527	0.978767	2.23797	-0.00914412	0.942736	0.981986	2.23787	-0.0745325	0.609206	0.834889	2.23786	0.161063	0.139917	0.999801	2.23791	0.0949282	0.485115	0.733041
Gm6374|ENSMUSG00000079140	-0.126747	0.0589059	0.812675	0.994968	-0.126797	-0.112526	0.619705	0.843178	-0.12672	-0.172658	0.518536	0.783047	-0.126703	0.109274	0.575497	0.999801	-0.12666	-0.0659878	0.78881	0.911199
Sphkap|ENSMUSG00000026163	5.58119	0.0967431	0.0632842	0.718342	5.58119	-0.0213067	0.662513	0.866682	5.58118	0.0479635	0.385923	0.688066	5.58118	0.0242709	0.555611	0.999801	5.58122	0.0733329	0.157389	0.400776
Pid1|ENSMUSG00000045658	4.64085	0.111734	0.162078	0.871395	4.64079	-0.0779868	0.286448	0.60119	4.64087	0.0254522	0.763474	0.913716	4.64087	0.0030159	0.961359	0.999801	4.64081	0.0298656	0.704708	0.871258
Dner|ENSMUSG00000036766	6.15754	0.0428019	0.369623	0.970269	6.15761	0.0413017	0.358301	0.670424	6.15752	0.0826992	0.103482	0.338459	6.15752	0.00170033	0.964288	0.999801	6.15763	0.0818018	0.0858508	0.275281
Trip12|ENSMUSG00000026219	7.99923	0.0347904	0.434483	0.977718	7.99919	-0.03199	0.446162	0.73937	7.99925	0.00251425	0.957569	0.985772	7.99926	-0.00282635	0.936312	0.999801	7.99926	-0.00209829	0.96235	0.986354
Fbxo36|ENSMUSG00000073633	1.1376	0.0618538	0.711612	0.991393	1.1375	0.445173	0.0067709	0.0572739	1.13757	0.426364	0.0199608	0.115857	1.13755	0.0754736	0.551433	0.999801	1.13752	0.50264	0.0044807	0.0327461
Slc16a14|ENSMUSG00000026220	2.12842	0.415619	0.000610005	0.111017	2.12849	0.371463	0.00065661	0.00996227	2.12836	0.64847	1.35725e-06	5.8423e-05	2.1283	0.135985	0.141106	0.999801	2.1281	0.78173	1.16508e-08	8.89103e-07
Rpl19-ps1|ENSMUSG00000064281	1.75992	0.186439	0.160168	0.871395	1.75991	0.00354412	0.976939	0.99413	1.75992	0.20026	0.15263	0.424882	1.75992	-0.0123774	0.904163	0.999801	1.7599	0.18024	0.169655	0.418422
Sp110|ENSMUSG00000070034	0.222103	0.106778	0.686854	0.991393	0.221846	-0.194152	0.435326	0.73208	0.222114	-0.0884618	0.751205	0.908154	0.222124	-0.00632285	0.975752	0.999801	0.222046	-0.10018	0.706177	0.871642
Sp140|ENSMUSG00000070031	-0.928618	-0.110495	0.778065	0.99203	-0.928795	-0.00643482	0.986558	0.996546	-0.928622	-0.0251405	0.950322	0.984052	-0.928619	-0.107141	0.731353	0.999801	-0.928656	-0.119803	0.753709	0.894572
Sp100|ENSMUSG00000026222	1.94931	0.0513096	0.681885	0.991393	1.94942	-0.0152507	0.896777	0.965064	1.94927	0.0896968	0.492776	0.766085	1.94927	-0.0575655	0.553172	0.999801	1.94935	0.0263786	0.830263	0.930913
A630001G21Rik|ENSMUSG00000052760	0.144505	-0.0593228	0.77359	0.99203	0.144467	0.267089	0.163444	0.448569	0.14449	0.213217	0.330418	0.642183	0.144485	-0.0110739	0.943424	0.999801	0.144406	0.20436	0.320216	0.591887
Cab39|ENSMUSG00000036707	7.14363	-0.0497524	0.26819	0.938956	7.14347	-0.0662536	0.112906	0.36693	7.14366	-0.156323	0.00106875	0.0129689	7.14368	0.0345312	0.331165	0.999801	7.14365	-0.123113	0.00598233	0.0407478
Itm2c|ENSMUSG00000026223	8.97339	0.0503791	0.268223	0.938956	8.97334	-0.0618474	0.146335	0.423757	8.9734	0.000744602	0.987747	0.996189	8.97341	-0.0163665	0.648337	0.999801	8.97343	-0.0186648	0.681712	0.859689
4933407L21Rik|ENSMUSG00000026224	2.20391	-0.0179307	0.875083	0.996817	2.20379	-0.123599	0.246044	0.558746	2.20392	-0.173002	0.153944	0.426679	2.20392	0.024857	0.786929	0.999801	2.20374	-0.132837	0.240266	0.508117
Spata3|ENSMUSG00000026226	-1.3953	0.5536	0.0756446	0.751177	-1.39543	-0.0827787	0.760488	0.911535	-1.39527	0.522628	0.114331	0.35937	-1.39528	-0.0567879	0.812537	0.999801	-1.3953	0.473482	0.12923	0.357544
2810459M11Rik|ENSMUSG00000026227	3.6697	-0.0407113	0.613231	0.987824	3.66964	-0.142328	0.0596225	0.248186	3.66971	-0.0899416	0.289932	0.602148	3.66973	-0.0961019	0.126959	0.999801	3.6697	-0.194668	0.0169816	0.0892352
Psmd1|ENSMUSG00000026229	7.09222	0.021655	0.630001	0.990814	7.09213	-0.0318454	0.448047	0.740493	7.09224	-0.0152074	0.750098	0.907663	7.09225	0.0012775	0.97128	0.999801	7.09223	-0.0159223	0.722735	0.879229
Gm21972|ENSMUSG00000094638	4.03652	0.0245006	0.74144	0.991393	4.03648	0.0364682	0.599688	0.834126	4.03653	0.0104814	0.89451	0.965707	4.03653	0.0479211	0.414364	0.999801	4.03652	0.0571814	0.440329	0.697589
Armc9|ENSMUSG00000062590	5.31527	-0.0564516	0.305069	0.949368	5.31532	-0.0736536	0.150268	0.428413	5.31527	-0.0642317	0.270172	0.57995	5.31528	-0.0683148	0.116445	0.999801	5.31537	-0.13649	0.0122966	0.0703241
B3gnt7|ENSMUSG00000079445	-0.220853	-0.495055	0.0385324	0.615196	-0.220627	1.07692	1.6103e-05	0.000518891	-0.220955	0.789367	0.0020749	0.0216093	-0.221004	-0.210933	0.217561	0.999801	-0.221034	0.57626	0.0141732	0.078028
Ncl|ENSMUSG00000026234	8.59361	-0.0124834	0.781517	0.992394	8.59348	-0.080042	0.0585808	0.245678	8.59364	-0.0891457	0.061896	0.247411	8.59366	-0.00925321	0.794982	0.999801	8.59362	-0.096999	0.0310532	0.138379
C130036L24Rik|ENSMUSG00000073627	1.77714	-0.0473487	0.717932	0.991393	1.77705	-0.072049	0.549791	0.803756	1.77713	-0.0263722	0.849831	0.949479	1.77713	-0.101865	0.318889	0.999801	1.77696	-0.12077	0.354775	0.624694
Ptma|ENSMUSG00000026238	5.94645	-0.100814	0.0750197	0.751177	5.94637	-0.0275205	0.591271	0.830019	5.94646	-0.0611141	0.296297	0.608612	5.94647	-0.0750171	0.0888983	0.999801	5.9465	-0.135518	0.0179644	0.0929711
Pde6d|ENSMUSG00000026239	5.09879	0.0474979	0.413975	0.977718	5.09871	-0.0566643	0.297647	0.612386	5.09879	0.00471436	0.939025	0.981775	5.0988	-0.0168265	0.713389	0.999801	5.09877	-0.0134805	0.816179	0.924448
Cops7b|ENSMUSG00000026240	4.23933	-0.0676439	0.342885	0.96851	4.2394	0.0607438	0.361078	0.67378	4.23933	-0.0146957	0.845747	0.94792	4.23934	0.00400684	0.943248	0.999801	4.23942	-0.0114451	0.871197	0.949155
Nppc|ENSMUSG00000026241	-0.639063	-0.120679	0.704587	0.991393	-0.638968	0.102424	0.733302	0.901506	-0.639078	0.0904054	0.782344	0.921387	-0.639088	-0.119911	0.618594	0.999801	-0.63878	-0.0316932	0.918402	0.969491
Dis3l2|ENSMUSG00000053333	4.9859	-0.0315712	0.597167	0.987824	4.98581	-0.0470166	0.399456	0.70382	4.98591	-0.0791031	0.212492	0.50922	4.98592	-0.00514512	0.913368	0.999801	4.98589	-0.0813549	0.171012	0.420181
Gm6136|ENSMUSG00000084106	6.12306	0.00637223	0.899706	0.997217	6.12301	-0.0319032	0.500917	0.776397	6.12306	-0.0212052	0.693312	0.880302	6.12306	-0.00612845	0.877862	0.999801	6.12304	-0.027879	0.582685	0.800278
Ecel1|ENSMUSG00000026247	5.57525	0.0946929	0.0687487	0.73322	5.5754	-0.0470101	0.33269	0.644843	5.57522	-0.0998711	0.0714669	0.272054	5.57521	0.148975	0.000332102	0.187394	5.57528	0.0443868	0.391535	0.659724
Prss56|ENSMUSG00000036480	1.41572	0.673712	0.00684143	0.316052	1.41561	-0.429048	0.0484973	0.219352	1.41576	-0.00572235	0.981894	0.994197	1.41576	0.260963	0.176302	0.999801	1.41579	0.219765	0.35355	0.623243
Eif4e2|ENSMUSG00000026254	5.64726	-0.0250019	0.626833	0.98988	5.64731	0.0306423	0.524681	0.791455	5.64726	0.0109307	0.841646	0.946791	5.64727	-0.00803936	0.843896	0.999801	5.64735	0.000608108	0.990476	0.996906
Efhd1|ENSMUSG00000026255	5.01462	-0.039043	0.518264	0.984789	5.01467	0.0301543	0.596057	0.832053	5.01461	0.0289688	0.647605	0.857896	5.0146	-0.0414864	0.382155	0.999801	5.01474	-0.0138968	0.813989	0.923605
Gigyf2|ENSMUSG00000048000	5.84116	0.0699558	0.160519	0.871395	5.84114	0.0271074	0.559821	0.810565	5.84117	0.10144	0.0564676	0.232549	5.84117	-0.00714256	0.856639	0.999801	5.84119	0.0904957	0.0680569	0.236457
3110079O15Rik|ENSMUSG00000026258	-0.602413	0.295218	0.352036	0.970269	-0.601988	1.27407	6.84505e-05	0.00167231	-0.602516	1.32834	0.000151573	0.00281644	-0.60257	0.253779	0.239193	0.999801	-0.602443	1.55143	9.55684e-06	0.000232382
Neu2|ENSMUSG00000079434	3.60698	-0.197105	0.0386682	0.615196	3.6072	0.0282793	0.741074	0.90427	3.60693	-0.0865364	0.372235	0.676774	3.60692	-0.0895148	0.213526	0.999801	3.60714	-0.173902	0.0621581	0.223033
Ngef|ENSMUSG00000026259	9.49376	-0.144919	0.0233558	0.532473	9.49383	-0.0448228	0.438604	0.733998	9.49375	-0.150303	0.0252573	0.136673	9.49377	-0.0436281	0.369569	0.999801	9.49388	-0.200093	0.00282287	0.0226227
Inpp5d|ENSMUSG00000026288	4.46055	0.124639	0.0669729	0.729719	4.46067	0.00569462	0.928462	0.976692	4.46051	0.229687	0.00146237	0.0166578	4.46049	-0.0999636	0.0612322	0.999801	4.46052	0.124005	0.0671638	0.234449
Atg16l1|ENSMUSG00000026289	6.26423	-0.0602656	0.202912	0.898703	6.26422	-0.10905	0.0136901	0.0940884	6.26425	-0.179395	0.000357742	0.00551155	6.26427	0.0075554	0.840243	0.999801	6.26435	-0.173431	0.000218489	0.00298855
Sag|ENSMUSG00000056055	0.329019	0.17824	0.37022	0.970696	0.329072	0.269154	0.142346	0.416727	0.328975	0.50152	0.0161761	0.100155	0.328947	-0.0521215	0.731044	0.999801	0.328925	0.435045	0.0273094	0.125931
Dgkd|ENSMUSG00000070738	6.4939	0.06888	0.137351	0.854025	6.49393	0.133061	0.00233128	0.0264115	6.49388	0.244591	9.50171e-07	4.34089e-05	6.49387	-0.0443795	0.223931	0.999801	6.49385	0.195558	2.30239e-05	0.000483832
Usp40|ENSMUSG00000005501	4.59087	0.0144633	0.825875	0.994968	4.5908	-0.0151804	0.804279	0.930253	4.59086	-0.0277433	0.689647	0.879095	4.59087	0.0247242	0.63452	0.999801	4.5908	-0.00492955	0.93991	0.977836
Ugt1a10|ENSMUSG00000090165	1.73963	0.0371395	0.782294	0.992394	1.73966	0.0763532	0.535445	0.795696	1.73962	0.101633	0.469369	0.750674	1.73961	0.0027155	0.979023	0.999801	1.73967	0.106511	0.425549	0.6871
Ugt1a9|ENSMUSG00000090175	1.70077	0.0432407	0.750451	0.991393	1.7008	0.0804027	0.519045	0.78823	1.70076	0.110772	0.436164	0.728999	1.70075	0.0034351	0.973794	0.999801	1.70079	0.116685	0.388531	0.656475
Ugt1a8|ENSMUSG00000089675	1.70187	0.0446019	0.742809	0.991393	1.7019	0.0790937	0.525702	0.791621	1.70185	0.109091	0.443052	0.733652	1.70185	0.00515618	0.960663	0.999801	1.70188	0.116681	0.388404	0.656325
Ugt1a7c|ENSMUSG00000090124	1.42788	-0.0229597	0.87573	0.996828	1.42786	-0.000285116	0.998349	0.999364	1.42788	0.0126493	0.934863	0.980648	1.42789	-0.046162	0.681875	0.999801	1.42793	-0.0286061	0.845821	0.938678
Ugt1a6b|ENSMUSG00000090145	1.77542	0.0597785	0.65352	0.991393	1.77544	0.081897	0.502269	0.776788	1.77541	0.116346	0.403528	0.701141	1.7754	0.0161247	0.874657	0.999801	1.77543	0.134834	0.309309	0.582241
Ugt1a6a|ENSMUSG00000054545	2.26729	0.096326	0.407709	0.97686	2.26726	0.0192974	0.855456	0.951151	2.26728	0.122018	0.317551	0.629589	2.26728	-0.0149249	0.866353	0.999801	2.26728	0.108966	0.348153	0.61832
Ugt1a5|ENSMUSG00000089943	1.70122	0.0444146	0.743885	0.991393	1.70125	0.082186	0.509779	0.782156	1.70121	0.112112	0.430594	0.724153	1.7012	0.00503003	0.961633	0.999801	1.70124	0.119603	0.376639	0.646223
Ugt1a2|ENSMUSG00000090171	1.70214	0.0421795	0.756277	0.991393	1.70217	0.0841802	0.499458	0.775325	1.70213	0.114262	0.421672	0.715398	1.70212	0.00269896	0.979399	0.999801	1.70216	0.11948	0.37709	0.646223
Dnajb3|ENSMUSG00000081984	0.327316	-0.299753	0.140167	0.855984	0.32723	-0.0147708	0.934012	0.979045	0.327292	-0.0627207	0.767721	0.915232	0.327291	-0.257425	0.104989	0.999801	0.327113	-0.330782	0.104093	0.312388
Ugt1a1|ENSMUSG00000089960	1.70336	0.0372325	0.784112	0.992909	1.70339	0.0819744	0.510677	0.782974	1.70335	0.102922	0.46916	0.750567	1.70334	0.00697867	0.94676	0.999801	1.70338	0.112168	0.407038	0.672261
Hjurp|ENSMUSG00000044783	6.22069	0.108417	0.428255	0.977718	6.22078	-0.189528	0.150961	0.429406	6.22069	-0.0107676	0.94074	0.981775	6.2207	-0.0749529	0.492158	0.999801	6.22091	-0.0752577	0.582909	0.800278
Arl4c|ENSMUSG00000049866	5.05617	0.0293176	0.618394	0.988035	5.05619	0.138466	0.0122724	0.0872427	5.05614	0.178486	0.00419791	0.0370142	5.05612	-0.014392	0.756053	0.999801	5.05612	0.162654	0.00552121	0.0385223
Sh3bp4|ENSMUSG00000036206	4.18273	0.0382922	0.597589	0.987824	4.18281	0.195884	0.00399406	0.0391095	4.18269	0.317259	3.4702e-05	0.000840898	4.18266	-0.0874421	0.119185	0.999801	4.18277	0.232643	0.00131937	0.012642
Agap1|ENSMUSG00000055013	7.54922	0.0345506	0.463334	0.978767	7.5492	-0.104007	0.0246659	0.140556	7.54923	-0.0459931	0.35523	0.661811	7.54924	-0.0246073	0.507075	0.999801	7.54925	-0.071697	0.132904	0.36272
Gbx2|ENSMUSG00000034486	-0.209955	0.180329	0.4162	0.977718	-0.209881	0.0140554	0.945262	0.98274	-0.209981	0.0798456	0.731919	0.899145	-0.209992	0.11906	0.498168	0.999801	-0.210026	0.192972	0.376864	0.646223
D130058E05Rik|ENSMUSG00000092627	-2.11901	0.473618	0.178257	0.880924	-2.11889	-0.560981	0.0952342	0.330053	-2.11901	0.0785097	0.834932	0.944069	-2.11901	-0.163855	0.5625	0.999801	-2.11888	-0.095039	0.786974	0.910455
Asb18|ENSMUSG00000067081	-0.380144	-0.23046	0.319597	0.956281	-0.380134	0.349165	0.100419	0.340633	-0.380128	0.0348539	0.887457	0.962759	-0.380125	0.0734191	0.691029	0.999801	-0.380176	0.116386	0.607822	0.816512
Iqca|ENSMUSG00000026301	-0.641185	0.412206	0.424166	0.977718	-0.642343	-0.352257	0.394713	0.70173	NA	NA	NA	NA	NA	NA	NA	NA	NA	NA	NA	NA
Ackr3|ENSMUSG00000044337	-0.889533	0.342222	0.190167	0.896661	-0.889569	-0.133951	0.568389	0.816508	-0.889533	-0.0549354	0.844179	0.947279	-0.889528	0.258323	0.218801	0.999801	-0.889714	0.20779	0.421491	0.683129
Cops8|ENSMUSG00000034432	6.36184	-0.000767201	0.98698	0.999487	6.36181	0.0327567	0.455047	0.744256	6.36183	0.0375897	0.452529	0.738917	6.36183	-0.0105041	0.777013	0.999801	6.36183	0.0268378	0.566532	0.789616
Col6a3|ENSMUSG00000048126	1.51904	-0.134737	0.341326	0.968085	1.51924	-0.0769831	0.574896	0.820746	1.51899	-0.0569826	0.701279	0.885423	1.51899	-0.157559	0.172436	0.999801	1.51902	-0.193381	0.174317	0.424348
Mlph|ENSMUSG00000026303	1.63075	0.161746	0.253233	0.932877	1.6311	-0.0457012	0.732643	0.90109	1.63069	0.00915301	0.951777	0.984439	1.6307	0.113042	0.326892	0.999801	1.63084	0.12091	0.390865	0.65912
Lrrfip1|ENSMUSG00000026305	5.22028	0.0360073	0.522004	0.984789	5.22034	0.201909	0.000413232	0.00697863	5.22024	0.247054	0.000170945	0.00307214	5.22023	-0.00963173	0.828049	0.999801	5.2202	0.232899	0.000143391	0.00210671
Ramp1|ENSMUSG00000034353	6.12965	-0.0716383	0.213951	0.908079	6.12963	-0.017034	0.745129	0.905797	6.12963	-0.0871235	0.159881	0.435398	6.12964	-0.00651482	0.885578	0.999801	6.12966	-0.0910331	0.115549	0.333818
Ube2f|ENSMUSG00000034343	4.25457	-0.0536659	0.450108	0.977718	4.25455	0.0607441	0.360031	0.672415	4.25457	0.0405973	0.591412	0.824009	4.25458	-0.0359313	0.521299	0.999801	4.25463	0.00137381	0.984515	0.994875
Gm7785|ENSMUSG00000083064	1.43788	0.00629553	0.965107	0.999487	1.43772	0.0282596	0.831463	0.941419	1.43787	0.0134485	0.930131	0.978892	1.43787	0.0168026	0.881319	0.999801	1.43776	0.0295111	0.837471	0.935353
Scly|ENSMUSG00000026307	3.55122	0.0254241	0.758306	0.991393	3.55139	0.214982	0.00521208	0.0473137	3.55116	0.252184	0.00381146	0.0345675	3.55113	-0.0114174	0.85867	0.999801	3.5512	0.23362	0.0043572	0.0320491
Ilkap|ENSMUSG00000026309	4.92255	0.0719224	0.234828	0.922486	4.92252	0.00555991	0.921656	0.974486	4.92254	0.00134522	0.983309	0.994508	4.92254	0.0734252	0.125958	0.999801	4.92253	0.0724009	0.228367	0.493703
Hes6|ENSMUSG00000067071	2.37441	0.0708235	0.525397	0.984789	2.37431	0.331634	0.00144676	0.0184333	2.37437	0.364583	0.00196349	0.0208935	2.37434	0.0380177	0.663594	0.999801	2.37412	0.400292	0.000300782	0.00385713
Per2|ENSMUSG00000055866	5.72207	0.0669337	0.631234	0.9909	5.72203	-0.450892	0.00161023	0.0199825	5.72213	-0.326719	0.0354173	0.172036	5.7222	-0.0462412	0.677454	0.999801	5.72248	-0.405131	0.0056915	0.039357
Traf3ip1|ENSMUSG00000034292	4.08739	0.029364	0.686708	0.991393	4.08742	-0.00542895	0.937193	0.979987	4.0874	0.140841	0.0695791	0.267451	4.08741	-0.117638	0.0442688	0.967681	4.08746	0.0217564	0.763568	0.899753
Asb1|ENSMUSG00000026311	5.73591	0.0484347	0.342084	0.968297	5.73595	0.0832337	0.0791144	0.295518	5.73591	0.0892817	0.0996986	0.331722	5.7359	0.0378772	0.345461	0.999801	5.73595	0.128111	0.0114075	0.0665754
Hdac4|ENSMUSG00000073617	3.89179	0.0474056	0.621283	0.988137	3.89177	0.0590578	0.511168	0.783362	3.89179	0.0574634	0.571309	0.813257	3.89179	0.0510455	0.49322	0.999801	3.89187	0.091826	0.341118	0.611929
Hdac4|ENSMUSG00000026313	3.97286	0.0122938	0.88837	0.997217	3.97278	-0.0494124	0.545861	0.802187	3.97288	-0.153676	0.104837	0.341257	3.97289	0.118117	0.0963028	0.999801	3.97289	-0.0531244	0.539951	0.771475
Ndufa10|ENSMUSG00000026260	6.87764	0.0160831	0.723005	0.991393	6.87759	-0.0540982	0.201655	0.505166	6.87765	-0.0464351	0.334742	0.644996	6.87766	0.00520729	0.884684	0.999801	6.87769	-0.0431777	0.338395	0.610054
Myeov2|ENSMUSG00000073616	5.53141	-0.0157122	0.766735	0.991393	5.53142	0.082909	0.0931059	0.325747	5.53139	0.0591074	0.293288	0.605374	5.53138	0.0046179	0.911146	0.999801	5.53139	0.0632162	0.230492	0.495887
Gpc1|ENSMUSG00000034220	6.13807	0.0683021	0.154133	0.865304	6.13808	0.0161129	0.718673	0.894992	6.13805	0.0386707	0.449368	0.737411	6.13805	0.0426599	0.262186	0.999801	6.13803	0.0802465	0.0935339	0.292158
Ankmy1|ENSMUSG00000034212	-1.98512	-0.34797	0.46043	0.978767	-1.98533	0.417703	0.326409	0.640401	-1.98515	0.205507	0.672089	0.870246	NA	NA	NA	NA	-1.9855	0.111456	0.808091	0.92151
Dusp28|ENSMUSG00000047067	3.9293	0.0840756	0.269766	0.938956	3.92931	0.00994623	0.88913	0.961739	3.92928	0.13112	0.103208	0.338004	3.92927	-0.0394009	0.50785	0.999801	3.92928	0.0908885	0.231608	0.49753
5033417F24Rik|ENSMUSG00000097251	0.713804	0.336634	0.0493137	0.66942	0.713711	-0.554624	0.000790618	0.0115663	0.71383	-0.485688	0.00736147	0.0561517	0.713837	0.267586	0.0578501	0.996196	0.713907	-0.229204	0.166247	0.413537
Rnpepl1|ENSMUSG00000026269	4.89052	0.0217665	0.721795	0.991393	4.89061	0.031859	0.578564	0.823684	4.89049	0.0247043	0.70258	0.886112	4.89049	0.0272638	0.57258	0.999801	4.89053	0.0498024	0.410908	0.674485
Capn10|ENSMUSG00000026270	4.60182	0.0221895	0.734063	0.991393	4.60188	0.051265	0.40131	0.705258	4.60181	0.0725523	0.299465	0.61234	4.60182	-0.000438453	0.993278	0.999801	4.60183	0.0696586	0.286096	0.558227
Gpr35|ENSMUSG00000026271	-1.24873	0.236247	0.403952	0.97653	-1.24868	-0.160572	0.529586	0.792936	-1.24874	0.00134494	0.996613	0.998829	-1.24875	0.0690207	0.756143	0.999801	-1.24864	0.0705013	0.800252	0.917964
Kif1a|ENSMUSG00000014602	10.1859	0.0669103	0.147276	0.857574	10.186	-0.0137452	0.752138	0.908783	10.1859	0.0352609	0.471884	0.751679	10.1859	0.0177216	0.628618	0.999801	10.186	0.0489637	0.289019	0.56136
Sned1|ENSMUSG00000047793	2.90475	0.0367873	0.704688	0.991393	2.90475	-0.101719	0.271333	0.586846	2.90477	-0.280061	0.00944075	0.0675038	2.90477	0.213923	0.00956204	0.609387	2.90483	-0.0652135	0.495246	0.741614
Mterfd2|ENSMUSG00000026273	3.79248	0.0258507	0.740055	0.991393	3.79242	-0.0596442	0.408687	0.710733	3.7925	-0.077472	0.349747	0.657436	3.79251	0.0411058	0.505154	0.999801	3.79253	-0.0372502	0.631035	0.829571
Pask|ENSMUSG00000026274	3.16187	0.109813	0.25447	0.933282	3.16201	0.0864825	0.344302	0.657481	3.16187	0.0694348	0.489659	0.764428	3.16186	0.127177	0.100574	0.999801	3.16195	0.199363	0.0422573	0.171579
Ppp1r7|ENSMUSG00000026275	8.18692	0.0243016	0.586262	0.987221	8.18688	-0.031085	0.457401	0.746187	8.18693	-0.0673334	0.15524	0.428755	8.18694	0.0561662	0.111989	0.999801	8.18692	-0.0111542	0.802506	0.919008
Ano7|ENSMUSG00000034107	-1.32379	-0.34968	0.277718	0.942414	-1.32389	0.179045	0.552886	0.805959	-1.32379	0.0297887	0.930457	0.978892	-1.32379	-0.20057	0.443093	0.999801	-1.32406	-0.152853	0.626996	0.827443
Hdlbp|ENSMUSG00000034088	7.79242	-0.0258455	0.562361	0.984789	7.79238	-0.083662	0.044683	0.208462	7.79244	-0.0968049	0.0411933	0.188955	7.79245	-0.0163213	0.644512	0.999801	7.79248	-0.115225	0.00963158	0.0584667
Sept2|ENSMUSG00000026276	6.55849	-0.0221249	0.632052	0.9909	6.55848	0.0164471	0.70478	0.889283	6.55849	0.00736564	0.880405	0.960068	6.5585	-0.0167885	0.64372	0.999801	6.55852	-0.00903147	0.844769	0.93806
Farp2|ENSMUSG00000034066	3.63845	-0.0716939	0.372571	0.970798	3.63849	-0.145378	0.0514156	0.227476	3.63846	-0.151265	0.0756911	0.282453	3.63848	-0.069729	0.270336	0.999801	3.6385	-0.217886	0.00644595	0.0430418
Stk25|ENSMUSG00000026277	7.43888	0.0273891	0.53917	0.984789	7.43882	-0.114169	0.00639108	0.0548286	7.4389	-0.124986	0.00801358	0.0594838	7.43891	0.0356773	0.313041	0.999801	7.43891	-0.0915038	0.0389231	0.162281
Bok|ENSMUSG00000026278	3.53486	0.169939	0.0705001	0.737385	3.535	0.193739	0.0268873	0.148916	3.53483	0.335955	0.00162405	0.0180085	3.53482	0.0229801	0.745391	0.999801	3.53482	0.359166	0.000394067	0.00480127
Atg4b|ENSMUSG00000026280	5.41673	0.06468	0.230323	0.92081	5.41673	-0.0524153	0.29553	0.610504	5.41674	0.0170787	0.764399	0.914114	5.41675	-0.00813615	0.84767	0.999801	5.41678	0.00814387	0.879129	0.952485
Thap4|ENSMUSG00000026279	4.38859	-0.0697345	0.308713	0.949368	4.38857	0.0164762	0.798189	0.927824	4.38858	-0.0767641	0.291495	0.60371	4.38858	0.0207389	0.705055	0.999801	4.3886	-0.0588102	0.385272	0.65407
Dtymk|ENSMUSG00000026281	4.49259	0.0605371	0.368523	0.970269	4.49254	-0.0338778	0.588835	0.828887	4.4926	-0.0069861	0.922073	0.976147	4.4926	0.029277	0.583041	0.999801	4.4926	0.022955	0.729944	0.882424
Ing5|ENSMUSG00000026283	4.57566	-0.0856026	0.194387	0.896661	4.57559	-0.161608	0.00854248	0.0677365	4.57568	-0.19038	0.00671715	0.0523797	4.57571	-0.0634315	0.224408	0.999801	4.57573	-0.252841	0.000113821	0.00175442
D2hgdh|ENSMUSG00000073609	3.56911	0.0653428	0.422119	0.977718	3.56904	-0.114315	0.130717	0.397569	3.56913	-0.17369	0.0436284	0.19654	3.56914	0.119574	0.0644256	0.999801	3.56914	-0.0513512	0.524044	0.761476
Neu4|ENSMUSG00000034000	3.38101	-0.0184192	0.856396	0.996047	3.38112	0.0551034	0.559688	0.810565	3.38099	0.0813599	0.448631	0.736919	3.38098	-0.0514674	0.517689	0.999801	3.38114	0.0321145	0.749833	0.892593
Fam174a|ENSMUSG00000051185	5.79602	-0.0175532	0.728729	0.991393	5.79599	0.0440481	0.347557	0.660248	5.79602	-0.00995711	0.852914	0.950829	5.79602	0.0302059	0.44725	0.999801	5.79602	0.0203602	0.684562	0.861287
Gm15427|ENSMUSG00000081051	6.658	-0.0339676	0.48393	0.978767	6.65797	0.0250935	0.57366	0.819957	6.65799	-0.00793563	0.876723	0.959069	6.65799	-0.00490689	0.896236	0.999801	6.65799	-0.0119142	0.803421	0.919563
St8sia4|ENSMUSG00000040710	4.76782	0.0696194	0.291113	0.943476	4.76773	0.0348866	0.568123	0.816398	4.76782	0.106268	0.133702	0.391888	4.76782	-0.00644647	0.900513	0.999801	4.76779	0.0972723	0.13941	0.372764
Slco4c1|ENSMUSG00000040693	1.17391	-0.0362326	0.81231	0.994968	1.17381	-0.0428204	0.759622	0.911387	1.17394	-0.218875	0.17833	0.461203	1.17395	0.134697	0.275986	0.999801	1.1738	-0.0822862	0.58554	0.802277
Gm5101|ENSMUSG00000097814	2.17459	0.120212	0.298841	0.945186	2.17444	-0.166155	0.119716	0.3788	2.17463	-0.0618412	0.618146	0.840216	2.17464	0.00699822	0.940542	0.999801	2.17461	-0.0539386	0.637037	0.832583
Gm6430|ENSMUSG00000044757	-1.49368	0.234995	0.436981	0.977718	-1.49379	0.0373643	0.893144	0.96331	-1.49369	0.229729	0.469122	0.750567	-1.4937	0.0424872	0.856329	0.999801	-1.49374	0.265861	0.373961	0.643892
D1Ertd622e|ENSMUSG00000044768	5.41441	0.0466884	0.387418	0.971865	5.41425	-0.0612304	0.224346	0.531541	5.41443	-0.00501952	0.930026	0.978892	5.41445	-0.0147658	0.727646	0.999801	5.4144	-0.0196969	0.714298	0.875494
Ppip5k2|ENSMUSG00000040648	5.60317	-0.0421014	0.417702	0.977718	5.60311	-0.0633072	0.194745	0.494921	5.60318	-0.144236	0.00989053	0.0696156	5.60319	0.0333659	0.41593	0.999801	5.60318	-0.105416	0.0403687	0.16632
Gin1|ENSMUSG00000026333	3.23888	-0.0976629	0.269815	0.938956	3.23875	-0.0884755	0.275882	0.590934	3.23888	-0.0753898	0.421305	0.715261	3.23889	-0.11811	0.087269	0.999801	3.23882	-0.189815	0.0303938	0.136048
Pam|ENSMUSG00000026335	7.53421	0.0688524	0.12215	0.843119	7.53424	0.049706	0.233776	0.544392	7.53421	0.0914591	0.0540629	0.226235	7.5342	0.0239477	0.499355	0.999801	7.53422	0.112234	0.0115923	0.0672938
Gm3531|ENSMUSG00000089782	5.56245	0.0289216	0.581644	0.985785	5.56239	0.0904508	0.0657231	0.264541	5.56244	0.118481	0.0331452	0.164545	5.56244	-0.00388347	0.925023	0.999801	5.56239	0.116128	0.0259992	0.121529
B230216N24Rik|ENSMUSG00000089706	2.15655	0.0960861	0.407657	0.97686	2.15654	-0.162802	0.139859	0.413053	2.15659	-0.166913	0.170529	0.450388	2.1566	0.0958674	0.302377	0.999801	2.15676	-0.0644123	0.570502	0.792296
Gm3555|ENSMUSG00000089791	2.46166	0.00307022	0.977147	0.999487	2.46176	0.00465894	0.963212	0.98972	2.46168	-0.00117953	0.991782	0.997244	2.46169	0.00274172	0.974535	0.999801	2.46185	0.00363907	0.972695	0.990441
Cntnap5b|ENSMUSG00000067028	4.45469	-0.154283	0.108601	0.82503	4.45461	0.0961825	0.285935	0.600835	4.45472	-0.0797862	0.428321	0.721694	4.45474	0.0119242	0.876039	0.999801	4.45462	-0.0484944	0.612608	0.818844
Gm7110|ENSMUSG00000082431	3.02681	0.141126	0.127715	0.847946	3.02666	0.00175841	0.983542	0.995721	3.02682	0.0882941	0.370364	0.674937	3.02683	0.0486275	0.509512	0.999801	3.02671	0.138327	0.133374	0.363331
Cdh20|ENSMUSG00000050840	4.25756	-0.0409882	0.567061	0.984789	4.25758	0.0145397	0.826918	0.939263	4.25755	-0.052351	0.488863	0.763881	4.25755	0.0244216	0.660312	0.999801	4.25767	-0.0343175	0.63004	0.828964
Rnf152|ENSMUSG00000047496	2.64181	0.110657	0.281497	0.943213	2.64179	-0.0231424	0.810485	0.933078	2.64184	0.0322434	0.767558	0.915232	2.64184	0.0520719	0.522716	0.999801	2.64201	0.085481	0.399305	0.665924
Gm3608|ENSMUSG00000067017	3.5778	-0.0914608	0.308342	0.949368	3.57778	0.112181	0.177995	0.47155	3.5778	-0.0582147	0.540607	0.796221	3.5778	0.0780789	0.271908	0.999801	3.57783	0.0160895	0.855147	0.942283
Pign|ENSMUSG00000056536	4.67839	0.00279312	0.96511	0.999487	4.67831	-0.0370238	0.536152	0.796024	4.67839	0.0286612	0.673043	0.870959	4.67839	-0.0672628	0.186537	0.999801	4.67832	-0.0357126	0.573438	0.794162
2310035C23Rik|ENSMUSG00000026319	6.42848	0.00179894	0.969216	0.999487	6.42842	-0.0357311	0.413541	0.71351	6.4285	0.00658013	0.894284	0.965707	6.42851	-0.045878	0.212939	0.999801	6.42851	-0.0366726	0.428649	0.689112
Tnfrsf11a|ENSMUSG00000026321	1.99919	0.153077	0.212538	0.906284	1.99922	-0.0288173	0.796997	0.927329	1.99917	0.125191	0.339404	0.64923	1.99916	-0.00824119	0.931736	0.999801	1.99907	0.123792	0.311589	0.58531
Zcchc2|ENSMUSG00000038866	4.49369	0.195995	0.0034855	0.243445	4.4937	0.0991771	0.116243	0.372617	4.49369	0.253523	0.000504821	0.0072861	4.49368	0.039762	0.454367	0.999801	4.49361	0.293108	3.79646e-05	0.000721075
Phlpp1|ENSMUSG00000044340	7.14045	-0.0168113	0.708728	0.991393	7.14051	0.0486488	0.252168	0.566036	7.14043	0.0790375	0.096891	0.327146	7.14043	-0.0491269	0.163586	0.999801	7.14051	0.0262275	0.559613	0.783886
Bcl2|ENSMUSG00000057329	5.44967	0.00602735	0.946471	0.998531	5.44977	0.0506962	0.544889	0.801779	5.44968	-0.0861496	0.37857	0.682501	5.44968	0.147381	0.0471072	0.976258	5.44985	0.0437232	0.624909	0.826028
Kdsr|ENSMUSG00000009905	5.31552	0.00558379	0.919778	0.997501	5.31555	0.0800822	0.122388	0.383368	5.31551	0.110699	0.0592639	0.240538	5.31552	-0.0318193	0.46422	0.999801	5.31553	0.0827046	0.132863	0.36272
Vps4b|ENSMUSG00000009907	6.07435	-0.0370846	0.441126	0.977718	6.07427	-0.0350284	0.437967	0.733505	6.07437	-0.0941013	0.0658925	0.257851	6.07438	0.0171989	0.653125	0.999801	6.07437	-0.0745831	0.118589	0.338991
Serpinb8|ENSMUSG00000026315	-1.51004	0.415344	0.231532	0.921384	-1.51037	0.336708	0.256617	0.569865	-1.50994	0.458435	0.219601	0.518282	-1.50991	0.283863	0.291386	0.999801	NA	NA	NA	NA
Cdh7|ENSMUSG00000026312	4.62076	-0.0218774	0.772115	0.99203	4.62055	-0.580015	2.93265e-09	4.70732e-07	4.62086	-0.652185	4.6301e-09	5.62574e-07	4.62093	0.0431379	0.487849	0.999801	4.62095	-0.598896	4.92356e-09	4.45309e-07
Cdh19|ENSMUSG00000047216	3.8348	0.0797878	0.563361	0.984789	3.83469	0.224789	0.0897674	0.319337	3.83476	0.234849	0.105722	0.343187	3.83473	0.0608364	0.562195	0.999801	3.83466	0.30881	0.0302682	0.135659
Dsel|ENSMUSG00000038702	5.22985	-0.00498443	0.928928	0.997501	5.22974	-0.0229317	0.660645	0.865537	5.22988	-0.0555271	0.351192	0.658707	5.22989	0.0242592	0.586276	0.999801	5.22983	-0.0311415	0.575325	0.795358
Cntnap5a|ENSMUSG00000070695	4.05438	0.107801	0.391818	0.972161	4.05428	-0.303556	0.0132887	0.092104	4.05444	-0.138598	0.30723	0.620617	4.05445	-0.0581254	0.576683	0.999801	4.0544	-0.190725	0.134429	0.364728
Tsn|ENSMUSG00000026374	6.53701	-0.0479688	0.297439	0.944002	6.53694	-0.0193118	0.655318	0.863632	6.53703	-0.0769309	0.115543	0.361715	6.53703	0.00439384	0.904223	0.999801	6.53701	-0.070407	0.124802	0.34979
Mki67ip|ENSMUSG00000026377	3.93176	-0.0499775	0.504632	0.983437	3.93164	0.0344859	0.62527	0.847126	3.93179	-0.0209656	0.793242	0.925366	3.93179	0.00268148	0.964516	0.999801	3.93177	-0.0186024	0.8041	0.919619
Clasp1|ENSMUSG00000064302	6.71899	0.038985	0.3893	0.972161	6.71895	-0.0255669	0.547888	0.802905	6.719	0.0182866	0.704732	0.887038	6.71901	-0.00679095	0.851465	0.999801	6.71901	0.00848255	0.850823	0.940893
Tfcp2l1|ENSMUSG00000026380	3.67996	0.0377488	0.636391	0.990949	3.68009	-0.0281976	0.706174	0.890092	3.67992	0.00407569	0.961636	0.987458	3.67993	0.00857356	0.892778	0.999801	3.68002	0.000277006	0.997234	0.998909
Gli2|ENSMUSG00000048402	2.30179	-0.079639	0.488206	0.980691	2.30191	0.231763	0.0302719	0.161416	2.30175	0.16375	0.17241	0.452748	2.30174	-0.0179158	0.839492	0.999801	2.30176	0.15033	0.184823	0.439533
Inhbb|ENSMUSG00000037035	1.72434	-0.128632	0.339937	0.967444	1.7243	0.138621	0.26901	0.584102	1.72435	-0.109256	0.442194	0.732962	1.72436	0.116326	0.266099	0.999801	1.72437	0.000710113	0.995834	0.998361
Ralb|ENSMUSG00000004451	3.65772	0.113762	0.154564	0.865873	3.65787	0.159088	0.035958	0.180536	3.65766	0.278297	0.00114238	0.013667	3.65763	-0.0044125	0.944473	0.999801	3.65764	0.27052	0.000795863	0.00835143
TMEM185B|ENSMUSG00000098923	2.28691	0.0111664	0.921563	0.997501	2.28682	-0.164544	0.117922	0.375337	2.28693	-0.0605736	0.614425	0.8382	2.28695	-0.0953807	0.285813	0.999801	2.28691	-0.16508	0.141352	0.37583
Tmem185b|ENSMUSG00000037015	3.52509	0.0352865	0.66809	0.991393	3.5251	-0.0577843	0.449594	0.741501	3.52509	-0.0519306	0.553076	0.803099	3.5251	0.0274505	0.673515	0.999801	3.52518	-0.0297558	0.715007	0.87567
Epb4.1l5|ENSMUSG00000026383	3.42443	-0.0754947	0.371803	0.970798	3.42455	0.354586	7.65309e-06	0.00028328	3.4244	0.25738	0.00418086	0.0369888	3.42438	0.017337	0.79328	0.999801	3.42438	0.274165	0.00116167	0.0113536
Ptpn4|ENSMUSG00000026384	5.70072	-0.00533501	0.917123	0.997217	5.70064	-0.0584775	0.222733	0.530362	5.70074	-0.0427482	0.437226	0.729205	5.70076	-0.0259552	0.526126	0.999801	5.70076	-0.0677156	0.190941	0.446321
Tmem177|ENSMUSG00000036975	3.21884	0.0776531	0.37832	0.971278	3.21884	0.0892041	0.278788	0.593883	3.21882	0.216967	0.0203076	0.117062	3.21882	-0.0497238	0.473189	0.999801	3.21881	0.159726	0.0686833	0.238071
Sctr|ENSMUSG00000026387	-1.79331	0.0298086	0.937063	0.997501	-1.79353	-0.199311	0.526357	0.791621	-1.79328	0.0840097	0.83269	0.942835	-1.79328	-0.28137	0.336101	0.999801	-1.7934	-0.17105	0.641473	0.835836
Tmem37|ENSMUSG00000050777	-0.539997	-0.0496975	0.843439	0.994968	-0.539994	-0.0404558	0.862872	0.953141	-0.54	-0.105876	0.689433	0.87901	-0.539989	0.0188455	0.92407	0.999801	-0.539954	-0.0984007	0.687123	0.862384
Dbi|ENSMUSG00000026385	6.60471	-0.10774	0.0188562	0.508495	6.60477	0.152219	0.00042665	0.00715597	6.60468	0.106737	0.0286927	0.149095	6.60466	-0.0664219	0.0671273	0.999801	6.6047	0.0442895	0.333203	0.60523
3110009E18Rik|ENSMUSG00000026388	0.715593	-0.360629	0.042777	0.633368	0.715472	0.236052	0.152557	0.431232	0.715563	-0.058967	0.753644	0.909472	0.715565	-0.0749741	0.583475	0.999801	0.715315	-0.129806	0.46291	0.715716
Steap3|ENSMUSG00000026389	2.245	-0.195376	0.141095	0.856228	2.24511	0.0831012	0.491068	0.77017	2.24497	-0.090761	0.507793	0.776316	2.24497	-0.0321377	0.747448	0.999801	2.24508	-0.121309	0.349538	0.619749
C1ql2|ENSMUSG00000036907	-0.617154	0.000815436	0.997362	0.999917	-0.617298	0.0454418	0.860652	0.952494	-0.617197	0.166441	0.564693	0.809228	-0.617229	-0.111716	0.615463	0.999801	-0.617414	0.0510647	0.847663	0.939685
B230209K01Rik|ENSMUSG00000097881	1.43591	-0.0579197	0.685468	0.991393	1.43598	0.0790464	0.554537	0.807294	1.43591	-0.0658084	0.663825	0.865761	1.43591	0.0814963	0.469532	0.999801	1.43602	0.0239662	0.86442	0.946355
Insig2|ENSMUSG00000003721	5.95451	-0.037623	0.445689	0.977718	5.95452	0.173812	0.000159628	0.00327162	5.95449	0.173435	0.00092035	0.0115391	5.95448	-0.0415462	0.284085	0.999801	5.95452	0.12669	0.00973854	0.0589276
Ccdc93|ENSMUSG00000026339	3.42805	0.123511	0.140179	0.855984	3.42806	-0.006121	0.937819	0.980168	3.42805	0.0766655	0.389814	0.690619	3.42806	0.0434783	0.514124	0.999801	3.42811	0.112512	0.177534	0.429185
Ddx18|ENSMUSG00000001674	3.35695	-0.0585541	0.491136	0.98165	3.35686	-0.0450692	0.56885	0.816516	3.35698	-0.0725844	0.420888	0.714845	3.35701	-0.0338486	0.616932	0.999801	3.35705	-0.11025	0.189234	0.444336
Dpp10|ENSMUSG00000036815	6.35426	0.288308	0.00217783	0.194967	6.35408	0.0522833	0.526078	0.791621	6.35427	0.405077	0.000112289	0.00220866	6.35425	-0.0687849	0.319238	0.999801	6.35405	0.339894	0.000411041	0.00496911
Actr3|ENSMUSG00000026341	7.64182	-0.10412	0.0204515	0.513203	7.64182	0.0637836	0.127928	0.392771	7.64181	-0.0259472	0.586242	0.821046	7.64182	-0.0201971	0.567692	0.999801	7.64187	-0.048508	0.278263	0.549137
Slc35f5|ENSMUSG00000026342	3.87167	0.0476417	0.54183	0.984789	3.8718	0.288289	0.000197269	0.00389884	3.87164	0.3393	0.000135623	0.00257177	3.87161	-0.00924351	0.877924	0.999801	3.87167	0.328945	9.5294e-05	0.0015139
Lypd1|ENSMUSG00000026344	6.88305	-0.0200274	0.799746	0.994794	6.88332	0.666857	5.74208e-10	1.28078e-07	6.88294	0.769975	3.05344e-10	5.85393e-08	6.88287	-0.13011	0.0423271	0.967681	6.88288	0.64241	4.40446e-09	4.04784e-07
Nckap5|ENSMUSG00000049690	1.80621	-0.0587281	0.65105	0.991393	1.8063	0.0875318	0.471047	0.756134	1.8062	-0.0738662	0.588975	0.822726	1.80619	0.0993134	0.323215	0.999801	1.80624	0.0278529	0.828723	0.930353
Mgat5|ENSMUSG00000036155	5.06521	-0.105034	0.102994	0.813717	5.06521	-0.139703	0.0234393	0.13582	5.06523	-0.165169	0.0197662	0.114986	5.06525	-0.0822253	0.112211	0.999801	5.06529	-0.250188	0.000379062	0.00464827
Tmem163|ENSMUSG00000026347	2.59782	0.316927	0.0026574	0.212448	2.59781	0.105265	0.285341	0.600835	2.59785	0.336435	0.00273352	0.0267146	2.59786	0.086607	0.296257	0.999801	2.59807	0.412694	7.79076e-05	0.00128053
Ccnt2|ENSMUSG00000026349	6.61331	0.00659293	0.907761	0.997217	6.61332	-0.169387	0.00329935	0.0341156	6.61334	-0.191996	0.00314984	0.0297318	6.61336	0.028521	0.530046	0.999801	6.61345	-0.165741	0.00577578	0.0397789
Map3k19|ENSMUSG00000051590	2.14346	0.124939	0.291604	0.943662	2.14373	-0.0341476	0.7536	0.909627	2.14347	-0.0421872	0.734394	0.899484	2.14346	0.134297	0.160412	0.999801	2.14376	0.0852729	0.460816	0.713837
Rab3gap1|ENSMUSG00000036104	6.36943	-0.0264811	0.569818	0.984789	6.36935	-0.0498077	0.253494	0.567165	6.36945	-0.066759	0.177435	0.460061	6.36946	-0.0137461	0.711393	0.999801	6.36944	-0.0805982	0.0815292	0.266663
Rpl28-ps1|ENSMUSG00000058603	4.97947	0.0200701	0.738826	0.991393	4.97942	-0.0215828	0.700922	0.886998	4.97946	-0.0652478	0.308432	0.621253	4.97947	0.0615798	0.191154	0.999801	4.97942	-0.00589845	0.922222	0.970567
Zranb3|ENSMUSG00000036086	3.27049	0.10832	0.213206	0.907407	3.27061	0.0299743	0.714371	0.893446	3.27046	0.208363	0.0237303	0.131017	3.27044	-0.0703619	0.303492	0.999801	3.27054	0.132126	0.126666	0.353133
R3hdm1|ENSMUSG00000056211	7.69452	0.0380952	0.395094	0.972965	7.69466	0.03244	0.441816	0.736789	7.6945	0.0439944	0.353599	0.660543	7.6945	0.0274496	0.435333	0.999801	7.6947	0.0606856	0.17358	0.423218
Ubxn4|ENSMUSG00000026353	6.23143	0.0366336	0.439827	0.977718	6.23141	-0.00889759	0.84106	0.944329	6.23144	0.00491455	0.922337	0.976277	6.23144	0.0208355	0.580003	0.999801	6.23148	0.0237765	0.614106	0.819543
Mcm6|ENSMUSG00000026355	2.41817	0.114335	0.299395	0.945345	2.418	-0.0476806	0.640216	0.85603	2.41818	0.0535506	0.64495	0.856273	2.41818	0.00491572	0.954382	0.999801	2.41806	0.066671	0.546027	0.7752
Dars|ENSMUSG00000026356	6.05338	-0.00566479	0.906846	0.997217	6.05327	0.0085852	0.849425	0.94813	6.05339	0.00453043	0.930031	0.978892	6.05339	-0.00660994	0.863442	0.999801	6.05336	-0.0017016	0.971954	0.990378
Cxcr4|ENSMUSG00000045382	-0.328568	0.152625	0.577363	0.985311	-0.329164	-0.00522289	0.982893	0.995524	-0.328495	-0.165691	0.582193	0.818962	-0.328491	0.300717	0.179649	0.999801	-0.328762	0.122042	0.663395	0.850335
Thsd7b|ENSMUSG00000042581	1.19573	0.363165	0.0195319	0.509232	1.19572	-0.147672	0.291559	0.605944	1.19576	0.253959	0.132436	0.390245	1.19575	-0.0414394	0.731141	0.999801	1.19575	0.207281	0.189775	0.444933
Gm15790|ENSMUSG00000089648	1.75589	0.142743	0.278067	0.942414	1.75584	0.0232085	0.848518	0.947425	1.75591	0.0489059	0.727268	0.896896	1.75593	0.10789	0.298259	0.999801	1.75591	0.164398	0.207231	0.467954
Rpl31-ps9|ENSMUSG00000094122	-2.39011	0.436375	0.315959	0.952987	-2.39017	-0.560527	0.168566	0.456428	NA	NA	NA	NA	NA	NA	NA	NA	NA	NA	NA	NA
Gm15675|ENSMUSG00000086825	0.722015	-0.0765984	0.704048	0.991393	0.722192	0.374326	0.0484059	0.219128	0.721949	0.387544	0.0706798	0.270106	0.721923	-0.0972911	0.507626	0.999801	0.722148	0.286588	0.15307	0.394124
Cd55|ENSMUSG00000026399	2.16938	-0.154815	0.202794	0.898703	2.16951	0.251412	0.0291687	0.157242	2.16935	0.0500593	0.690765	0.879559	2.16934	0.0357068	0.696984	0.999801	2.16953	0.0931582	0.430112	0.690018
Zp3r|ENSMUSG00000042554	-0.554245	-0.179773	0.542117	0.984789	-0.554104	1.01301	0.000633251	0.00970213	-0.554274	0.562615	0.0654335	0.2567	-0.554302	0.266332	0.20479	0.999801	-0.554181	0.809062	0.00580137	0.0399069
Yod1|ENSMUSG00000046404	3.71482	0.037451	0.636469	0.990949	3.71465	-0.0867286	0.235448	0.546401	3.71484	-0.0168969	0.841983	0.946791	3.71486	-0.0386913	0.537351	0.999801	3.71476	-0.0547544	0.487323	0.735177
Pfkfb2|ENSMUSG00000026409	6.30884	-0.044756	0.343044	0.968625	6.30887	0.0644472	0.145817	0.422818	6.30883	0.0147651	0.767597	0.915232	6.30883	-0.000710316	0.984777	0.999801	6.30885	0.017239	0.712015	0.874218
AA986860|ENSMUSG00000042510	1.8954	0.155739	0.22393	0.915036	1.8953	-0.114519	0.335866	0.648949	1.8954	0.170693	0.204781	0.498624	1.89542	-0.134366	0.177401	0.999801	1.89535	0.0330289	0.79495	0.914952
Mapkapk2|ENSMUSG00000016528	4.27303	0.0559116	0.430822	0.977718	4.27308	0.211916	0.00137674	0.0178054	4.27299	0.237407	0.00163069	0.0180509	4.27297	0.0266943	0.630974	0.999801	4.27295	0.265568	0.00016992	0.00241649
Dyrk3|ENSMUSG00000016526	1.2684	0.108585	0.467149	0.978767	1.26839	0.0343481	0.80365	0.92998	1.26841	0.118147	0.459256	0.743665	1.26841	0.0204343	0.863398	0.999801	1.26841	0.131049	0.375122	0.644974
Eif2d|ENSMUSG00000026427	4.63799	0.049543	0.446295	0.977718	4.63797	-0.0117039	0.847674	0.946977	4.63799	-0.00693787	0.919762	0.974904	4.638	0.0409409	0.423518	0.999801	4.63802	0.0339784	0.598623	0.810958
Rassf5|ENSMUSG00000026430	2.93562	0.132249	0.160473	0.871395	2.93565	-0.0775196	0.382529	0.691645	2.93562	0.031646	0.753397	0.909278	2.93562	0.0226898	0.764918	0.999801	2.93575	0.0505734	0.589734	0.804093
Ikbke|ENSMUSG00000042349	0.434992	0.0403801	0.833737	0.994968	0.434995	0.0885155	0.615919	0.841494	0.434971	-0.113431	0.579251	0.817604	0.434954	0.241203	0.105168	0.999801	0.434873	0.124627	0.514848	0.755121
Srgap2|ENSMUSG00000026425	6.66174	0.020346	0.656243	0.991393	6.66178	-0.00938634	0.826934	0.939263	6.66173	0.00685394	0.887511	0.962759	6.66174	0.00209541	0.95384	0.999801	6.66175	0.00857839	0.850143	0.940864
Fam72a|ENSMUSG00000055184	0.0375754	0.301229	0.168576	0.87426	0.037577	-0.0117196	0.952329	0.985375	0.037546	0.0887135	0.692375	0.879823	0.0375336	0.200235	0.230027	0.999801	0.0375533	0.286831	0.179288	0.431716
5430435G22Rik|ENSMUSG00000052688	-0.123629	-0.137645	0.523976	0.984789	-0.123419	0.294126	0.152109	0.430462	-0.123664	0.0793982	0.727046	0.896896	-0.123669	0.0815673	0.627553	0.999801	-0.123425	0.148884	0.482008	0.731225
Pm20d1|ENSMUSG00000042251	0.922806	0.150119	0.364282	0.970269	0.922861	-0.0100517	0.947654	0.98356	0.922815	0.0130124	0.94042	0.981775	0.922825	0.132107	0.309491	0.999801	0.92303	0.124202	0.450332	0.706869
Slc41a1|ENSMUSG00000013275	5.6726	-0.0676255	0.31372	0.952987	5.67269	-0.0575569	0.352786	0.6645	5.67261	-0.121663	0.0918901	0.315926	5.67264	-0.00655219	0.900742	0.999801	5.67275	-0.132508	0.0517123	0.197589
Rab7l1|ENSMUSG00000026433	1.07924	-0.122345	0.431069	0.977718	1.0793	0.116378	0.425886	0.723755	1.07922	0.0385557	0.814569	0.934467	1.07921	-0.0452586	0.714732	0.999801	1.07929	-0.0125094	0.935146	0.976366
Nucks1|ENSMUSG00000026434	7.77425	-0.00647191	0.884821	0.996828	7.77417	-0.0212659	0.612872	0.840733	7.77426	-0.0543929	0.251662	0.55887	7.77427	0.0208876	0.554957	0.999801	7.77423	-0.0305363	0.493466	0.74006
Slc45a3|ENSMUSG00000026435	1.34575	-0.0808945	0.671584	0.991393	1.34564	0.41638	0.0318164	0.166612	1.34576	0.364125	0.0805705	0.292692	1.34574	-0.026341	0.8617	0.999801	1.3457	0.345723	0.0794695	0.261603
Elk4|ENSMUSG00000026436	3.9062	0.0490484	0.525679	0.984789	3.9063	0.111932	0.118978	0.377436	3.90618	0.156336	0.0557892	0.230976	3.90618	0.00119624	0.984031	0.999801	3.90624	0.157363	0.0421326	0.171154
Mfsd4|ENSMUSG00000059149	3.01019	0.162526	0.0950288	0.8005	3.01037	0.782952	4.42257e-10	1.06983e-07	3.01012	0.990907	2.94798e-11	8.14593e-09	3.01007	-0.0502614	0.490031	0.999801	3.01022	0.937022	2.36329e-11	5.87797e-09
Cdk18|ENSMUSG00000026437	4.18195	0.0112654	0.881858	0.996828	4.18195	0.010565	0.883699	0.959663	4.18194	0.0621111	0.444201	0.734305	4.18194	-0.0402499	0.506803	0.999801	4.18203	0.0207638	0.782761	0.909577
Lemd1|ENSMUSG00000079330	-2.09965	0.280457	0.522057	0.984789	-2.09965	0.188763	0.625399	0.847233	NA	NA	NA	NA	NA	NA	NA	NA	NA	NA	NA	NA
Gm7241|ENSMUSG00000089808	-1.12148	0.308925	0.257403	0.935211	-1.12163	-0.377461	0.12731	0.391643	-1.12143	-0.6589	0.0325789	0.162486	-1.12142	0.587083	0.0110133	0.629383	-1.1215	-0.0744057	0.788453	0.910988
Klhdc8a|ENSMUSG00000042115	2.83907	-0.0879307	0.516689	0.984789	2.83922	0.0948986	0.462438	0.749563	2.83903	-0.0143508	0.920239	0.975187	2.839	0.0243979	0.822136	0.999801	2.83914	0.0109569	0.934625	0.9762
Nuak2|ENSMUSG00000009772	-0.375809	-0.282724	0.21776	0.910875	-0.375658	0.209197	0.330287	0.643023	-0.375851	-0.116466	0.626953	0.845622	-0.37587	0.0445729	0.803937	0.999801	-0.375859	-0.0728589	0.745999	0.890429
Tmcc2|ENSMUSG00000042066	7.63398	0.065296	0.144178	0.856329	7.63404	-0.0893786	0.0333068	0.171768	7.63397	-0.0342295	0.470325	0.751054	7.63397	0.00915764	0.794836	0.999801	7.634	-0.0288352	0.519169	0.7582
Dstyk|ENSMUSG00000042046	6.75629	0.0139216	0.759161	0.991393	6.75621	-0.0575157	0.17768	0.471259	6.75631	-0.0215162	0.656215	0.861896	6.75632	-0.0255909	0.4791	0.999801	6.75629	-0.0478758	0.290172	0.562707
6030442K20Rik|ENSMUSG00000097760	-0.738197	-0.206554	0.474985	0.978767	-0.738443	0.0347254	0.896857	0.965064	-0.738198	0.0707345	0.820582	0.937219	-0.738194	-0.257369	0.271596	0.999801	-0.738222	-0.167859	0.559348	0.783642
Rbbp5|ENSMUSG00000026439	5.9517	0.0737069	0.130826	0.852234	5.95158	-0.0997749	0.0290672	0.15699	5.95173	-0.0201545	0.697345	0.882603	5.95174	-0.00881881	0.820984	0.999801	5.95168	-0.0300843	0.535111	0.768155
Tmem81|ENSMUSG00000048174	2.37605	-0.0848954	0.444977	0.977718	2.37595	-0.0264766	0.798899	0.927916	2.37604	-0.0766567	0.511398	0.778599	2.37604	-0.0406543	0.640833	0.999801	2.37597	-0.113953	0.298352	0.570282
Cntn2|ENSMUSG00000053024	7.81105	-0.0238432	0.611744	0.987824	7.8111	0.08458	0.0684722	0.271449	7.81104	0.0962781	0.0601078	0.242984	7.81103	-0.0380348	0.310559	0.999801	7.81111	0.0582125	0.217079	0.479424
Nfasc|ENSMUSG00000026442	8.40939	-0.00424797	0.924167	0.997501	8.40945	-0.0320885	0.44654	0.73964	8.40939	-0.00510471	0.913678	0.972638	8.40939	-0.0322923	0.362079	0.999801	8.40949	-0.0417389	0.348	0.618241
Lrrn2|ENSMUSG00000026443	2.58468	-0.0380253	0.734334	0.991393	2.58465	-0.220583	0.0409441	0.19668	2.58468	-0.131109	0.273543	0.584187	2.58469	-0.132032	0.144449	0.999801	2.58465	-0.264264	0.0232577	0.111991
Mdm4|ENSMUSG00000054387	5.97416	0.0253272	0.603436	0.987824	5.97418	-0.0428487	0.34852	0.660702	5.97417	-0.0526775	0.307334	0.620655	5.97417	0.0315433	0.412109	0.999801	5.9742	-0.0190855	0.692501	0.865766
Pik3c2b|ENSMUSG00000026447	6.25032	-0.0175521	0.710252	0.991393	6.25035	-0.152695	0.000951603	0.0134628	6.25034	-0.18051	0.000587609	0.00818449	6.25035	0.00967142	0.797254	0.999801	6.25048	-0.173452	0.000433349	0.00518019
Ppp1r15b|ENSMUSG00000046062	6.28499	0.00895243	0.849439	0.995521	6.28497	0.00299553	0.946179	0.98308	6.28502	0.00724362	0.885008	0.961633	6.28503	0.000153547	0.996729	0.999801	6.28507	0.0102808	0.826826	0.929486
Plekha6|ENSMUSG00000041757	6.90711	0.0577641	0.214856	0.90924	6.90702	-0.302217	1.16553e-07	9.26761e-06	6.90717	-0.296395	9.41051e-07	4.31072e-05	6.90721	0.0495258	0.188575	0.999801	6.90724	-0.248259	8.08465e-06	0.000202341
Etnk2|ENSMUSG00000070644	-0.0356528	-0.0788138	0.713977	0.991393	-0.0355779	-0.0375167	0.850611	0.948653	-0.0356456	-0.154826	0.505224	0.775148	-0.035641	0.0357425	0.832821	0.999801	-0.0354613	-0.127206	0.558133	0.782605
Sox13|ENSMUSG00000070643	3.07848	-0.111123	0.244471	0.928029	3.07853	-0.18479	0.0438264	0.205661	3.07847	-0.290672	0.00623999	0.0496764	3.07848	-0.00286151	0.968685	0.999801	3.07862	-0.303556	0.00249446	0.0206491
Snrpe|ENSMUSG00000090553	3.65991	-0.00482099	0.952158	0.999369	3.65989	0.0581759	0.431932	0.729434	3.65992	0.00757758	0.929464	0.978854	3.65992	0.0392199	0.535026	0.999801	3.65994	0.047648	0.549567	0.777011
Zbed6|ENSMUSG00000094410	8.02348	0.01864	0.676139	0.991393	8.02351	-0.0524701	0.213168	0.518516	8.02349	-0.0399029	0.396898	0.696073	8.0235	0.00440087	0.900551	0.999801	8.02359	-0.0377982	0.393625	0.661
Zc3h11a|ENSMUSG00000026464	7.40777	0.00416166	0.925756	0.997501	7.4078	-0.0173752	0.680161	0.875432	7.40778	-0.00936693	0.842856	0.946866	7.40779	-0.005357	0.879489	0.999801	7.40787	-0.0174872	0.693293	0.866164
Atp2b4|ENSMUSG00000026463	6.38165	0.234893	0.0208737	0.517309	6.3819	0.466081	1.61012e-05	0.000518891	6.3816	0.636617	9.08819e-07	4.18545e-05	6.38155	0.0622788	0.422997	0.999801	6.38156	0.698329	4.20577e-08	2.58609e-06
Optc|ENSMUSG00000010311	-1.72623	-0.061294	0.8772	0.996828	-1.72615	-0.118184	0.746945	0.906371	-1.72626	-0.173786	0.682366	0.875088	-1.72626	-0.00325951	0.990613	0.999801	-1.72637	-0.167225	0.680437	0.859293
Prelp|ENSMUSG00000041577	3.77461	-0.0970551	0.396127	0.972965	3.7744	-0.220893	0.0435963	0.205142	3.77466	-0.336448	0.00877205	0.0635983	3.77468	0.0131185	0.887221	0.999801	3.77464	-0.326605	0.00715748	0.0467342
Fmod|ENSMUSG00000041559	0.364609	-0.0795862	0.781837	0.992394	0.364577	0.0547491	0.835343	0.942642	0.364563	-0.592719	0.057544	0.235792	0.364554	0.572148	0.0160268	0.747591	0.364415	-0.0065769	0.981531	0.993923
Btg2|ENSMUSG00000020423	3.16893	-0.130424	0.434658	0.977718	3.16894	0.355138	0.0268119	0.148643	3.16895	0.281269	0.117918	0.36635	3.16896	-0.0690144	0.592343	0.999801	3.16903	0.219541	0.187131	0.442147
Chit1|ENSMUSG00000026450	-2.0115	0.791249	0.0642136	0.723825	-2.01158	-0.450109	0.233946	0.544512	NA	NA	NA	NA	NA	NA	NA	NA	NA	NA	NA	NA
Chi3l1|ENSMUSG00000064246	3.25437	0.132592	0.134788	0.854025	3.25445	-0.183817	0.0290512	0.156953	3.25435	0.0488292	0.600805	0.830196	3.25435	-0.102618	0.138894	0.999801	3.25438	-0.0539696	0.537372	0.769527
Mybph|ENSMUSG00000042451	-1.11985	-0.205814	0.459161	0.978767	-1.11982	-0.177549	0.489997	0.76926	-1.11984	-0.0389934	0.896057	0.966703	-1.11982	-0.352065	0.116469	0.999801	-1.11974	-0.379183	0.178846	0.431052
Adora1|ENSMUSG00000042429	7.62362	-0.0542812	0.223003	0.914585	7.62361	-0.110621	0.00796514	0.0642561	7.62364	-0.161114	0.00065643	0.00884614	7.62367	-0.00701445	0.843332	0.999801	7.62373	-0.169069	0.000134872	0.00201354
Ppfia4|ENSMUSG00000026458	6.78258	-0.0172035	0.705458	0.991393	6.78287	0.332716	2.2675e-12	1.69323e-09	6.78249	0.357911	3.08582e-12	1.33809e-09	6.78246	-0.0430253	0.231439	0.999801	6.78253	0.312528	2.26263e-11	5.77276e-09
Tmem183a|ENSMUSG00000042305	6.01633	0.0448997	0.356362	0.970269	6.01631	0.0681193	0.132146	0.400329	6.01633	0.0514498	0.322352	0.634227	6.01633	0.0581713	0.130795	0.999801	6.0163	0.107757	0.0261812	0.122072
Cyb5r1|ENSMUSG00000026456	3.0822	0.0809569	0.37607	0.971141	3.08211	-0.0932973	0.273761	0.589056	3.08221	-0.0392299	0.686764	0.877492	3.08222	0.0257642	0.721695	0.999801	3.08214	-0.0190643	0.835371	0.933994
Adipor1|ENSMUSG00000026457	6.44561	0.034266	0.464203	0.978767	6.44558	-0.00232742	0.957521	0.987611	6.4456	0.0443718	0.371302	0.675926	6.44561	-0.0148901	0.685772	0.999801	6.44564	0.0254176	0.586717	0.803053
Klhl12|ENSMUSG00000026455	5.31216	0.0321686	0.557749	0.984789	5.31211	0.0402899	0.431286	0.728997	5.31217	0.0385492	0.508682	0.776923	5.31217	0.029742	0.497203	0.999801	5.31211	0.0697531	0.200658	0.459978
Rabif|ENSMUSG00000042229	4.82593	-0.00137384	0.98231	0.999487	4.8259	0.0303653	0.600179	0.834308	4.82593	0.0380801	0.564413	0.809228	4.82594	-0.012395	0.801704	0.999801	4.82596	0.023971	0.696521	0.867713
Kdm5b|ENSMUSG00000042207	6.56226	0.0745761	0.105858	0.818728	6.56222	0.0588443	0.172336	0.462768	6.56228	0.133183	0.0066308	0.0519904	6.56228	-0.00389815	0.914632	0.999801	6.56224	0.127823	0.00551011	0.0384628
Syt2|ENSMUSG00000026452	6.25981	-0.296437	0.00156839	0.161932	6.25977	-0.46801	1.96443e-06	9.37197e-05	6.25985	-0.657898	4.19939e-08	3.33074e-06	6.2599	-0.107654	0.129428	0.999801	6.26016	-0.763699	4.58301e-10	6.21762e-08
Ppp1r12b|ENSMUSG00000073557	7.05148	0.0856272	0.0559446	0.69346	7.05149	-0.0635269	0.130866	0.397749	7.05149	0.0175885	0.71118	0.889869	7.05149	0.00307518	0.930836	0.999801	7.05148	0.0167177	0.70839	0.871982
Ube2t|ENSMUSG00000026429	-0.645391	0.385952	0.11836	0.839458	-0.645602	-0.165643	0.467008	0.752637	-0.645338	0.0227563	0.932272	0.979617	-0.645316	0.193372	0.342235	0.999801	-0.645513	0.213295	0.385244	0.65407
Lgr6|ENSMUSG00000042793	-0.627451	-0.0426149	0.874064	0.996817	-0.627581	0.422222	0.0950226	0.329934	-0.627487	0.421296	0.134321	0.392963	-0.627517	-0.0520393	0.795094	0.999801	-0.627695	0.387532	0.154201	0.395826
Ptprv|ENSMUSG00000097993	4.72421	-0.443188	1.39368e-05	0.015595	4.72409	-1.05462	6.19202e-14	1.36891e-10	4.72429	-1.44063	4.74531e-16	4.06483e-12	4.72441	-0.0587347	0.405519	0.999801	4.72459	-1.50037	1.92592e-17	3.29217e-13
Ptpn7|ENSMUSG00000031506	3.20565	-0.333597	0.0176738	0.503636	3.20535	-1.28108	2.21305e-11	9.50229e-09	3.20581	-1.60056	3.5544e-12	1.46281e-09	3.20597	-0.0200234	0.858402	0.999801	3.20623	-1.62072	3.36454e-13	2.21206e-10
Arl8a|ENSMUSG00000026426	6.06644	0.0528932	0.275395	0.941762	6.06648	0.0422041	0.350844	0.663022	6.06643	0.082956	0.107604	0.346581	6.06643	0.00843145	0.82503	0.999801	6.06649	0.0890546	0.0647568	0.228804
Gm15445|ENSMUSG00000085311	-0.906444	0.0465542	0.86153	0.996047	-0.90649	0.224488	0.369869	0.680357	-0.906462	0.0576723	0.83518	0.944069	-0.906479	0.209985	0.295946	0.999801	-0.906541	0.253746	0.336592	0.607958
Gpr37l1|ENSMUSG00000026424	7.68336	-0.0325637	0.468754	0.978767	7.68346	0.0104858	0.803341	0.929868	7.68333	-0.00859469	0.856281	0.951162	7.68333	-0.0139956	0.691804	0.999801	7.68347	-0.0294585	0.512256	0.753185
Gm4204|ENSMUSG00000079139	7.44627	-0.0888375	0.0466051	0.65612	7.4462	0.0161093	0.70035	0.886781	7.44629	-0.110221	0.0202724	0.116986	7.4463	0.0300912	0.396643	0.999801	7.44632	-0.0759158	0.0873203	0.27874
Rnpep|ENSMUSG00000041926	5.60108	0.0429897	0.409769	0.97686	5.60103	0.0695388	0.151236	0.429459	5.60108	0.0496363	0.368788	0.67321	5.60107	0.0601516	0.142239	0.999801	5.60103	0.105584	0.0416121	0.169806
Timm17a|ENSMUSG00000062580	5.43034	-0.0187895	0.725436	0.991393	5.43024	-0.0356546	0.475237	0.758679	5.43036	-0.0994963	0.0802705	0.292256	5.43038	0.0414735	0.33014	0.999801	5.43039	-0.0597773	0.260413	0.531726
Lmod1|ENSMUSG00000048096	-1.10599	0.41077	0.221769	0.912646	-1.10611	0.127369	0.674578	0.873185	-1.10601	0.458486	0.190136	0.477905	-1.10602	0.0755926	0.768986	0.999801	-1.1061	0.540366	0.10663	0.317791
Shisa4|ENSMUSG00000041889	5.59768	0.00506552	0.923057	0.997501	5.5977	0.0994714	0.0504401	0.225191	5.59767	0.117358	0.0394176	0.183534	5.59766	-0.0174447	0.670665	0.999801	5.59777	0.0985985	0.0650822	0.229574
Ipo9|ENSMUSG00000041879	7.17022	0.0148772	0.739618	0.991393	7.17025	0.0323601	0.44138	0.736705	7.17022	0.00839685	0.859682	0.952889	7.17022	0.0364069	0.303253	0.999801	7.17024	0.042911	0.337187	0.608774
Nav1|ENSMUSG00000009418	6.80373	-0.0218246	0.635642	0.9909	6.80393	0.235036	7.91471e-06	0.000289841	6.80368	0.281836	2.45526e-06	9.4102e-05	6.80365	-0.0715832	0.0572078	0.996196	6.80375	0.210896	7.12223e-05	0.00119243
Gm4793|ENSMUSG00000054412	-0.0617285	0.313504	0.148231	0.857641	-0.061626	0.32929	0.10242	0.345321	-0.0617513	0.542975	0.0195424	0.114072	-0.0617633	0.0921454	0.581858	0.999801	-0.0617439	0.643633	0.0037081	0.0280719
Nav1|ENSMUSG00000090399	-1.24875	-0.185713	0.549473	0.984789	-1.2488	-0.0446895	0.87799	0.958505	-1.24874	-0.379453	0.249619	0.556283	-1.24874	0.148072	0.552116	0.999801	-1.24888	-0.22538	0.464661	0.716611
Csrp1|ENSMUSG00000026421	8.37691	-0.0493259	0.27304	0.940442	8.37693	0.0483834	0.254684	0.568099	8.37689	0.0313023	0.50988	0.777753	8.37688	-0.0370338	0.293372	0.999801	8.37698	-0.00232577	0.958799	0.984773
Phlda3|ENSMUSG00000041801	3.48647	0.0433921	0.600332	0.987824	3.48654	0.047249	0.544325	0.801571	3.48647	0.188444	0.0317316	0.159702	3.48646	-0.100016	0.126141	0.999801	3.48659	0.0906576	0.271465	0.543183
Tnni1|ENSMUSG00000026418	3.01412	0.0117073	0.919417	0.997501	3.01426	0.498675	5.82996e-05	0.00147033	3.01403	0.583645	3.06235e-05	0.000753797	3.01399	-0.0789055	0.366823	0.999801	3.01403	0.506316	0.000103395	0.00162299
Lad1|ENSMUSG00000041782	0.787194	-0.102268	0.553815	0.984789	0.787235	-0.00420393	0.9794	0.994507	0.787186	-0.254844	0.161357	0.437484	0.787181	0.141076	0.289212	0.999801	0.787234	-0.105917	0.54096	0.772142
Tnnt2|ENSMUSG00000026414	1.86896	0.370153	0.0209606	0.517642	1.86882	0.579403	0.000299524	0.00541118	1.8689	0.760163	4.65733e-05	0.00106386	1.86884	0.19289	0.112938	0.999801	1.86846	0.94979	5.1945e-07	2.04126e-05
Igfn1|ENSMUSG00000051985	-1.36805	-0.719973	0.122194	0.843119	-1.36818	0.346925	0.431792	0.729336	NA	NA	NA	NA	NA	NA	NA	NA	NA	NA	NA	NA
Tmem9|ENSMUSG00000026411	5.23062	0.0881573	0.119503	0.841518	5.23063	0.149448	0.00450373	0.0427052	5.23059	0.209929	0.000482751	0.00700889	5.23057	0.0235763	0.596935	0.999801	5.2305	0.234348	3.01521e-05	0.000595173
Cacna1s|ENSMUSG00000026407	-0.583779	0.0274325	0.913257	0.997217	-0.58396	-0.122873	0.592006	0.830248	-0.583763	-0.216877	0.416172	0.710633	-0.583752	0.118005	0.550611	0.999801	-0.583903	-0.118328	0.63861	0.833566
Gm15850|ENSMUSG00000086264	-1.62509	0.5723	0.154874	0.866173	-1.62542	-1.03114	0.00711154	0.059378	NA	NA	NA	NA	NA	NA	NA	NA	NA	NA	NA	NA
Kif21b|ENSMUSG00000041642	6.07439	-0.00230909	0.965126	0.999487	6.07454	0.0578125	0.253437	0.567165	6.07436	-0.000727441	0.989646	0.996673	6.07435	0.0539215	0.199412	0.999801	6.0745	0.0546954	0.299978	0.572429
Mroh3|ENSMUSG00000087230	-1.77162	0.252566	0.509149	0.984789	-1.77165	-0.316641	0.378503	0.687332	-1.77161	-0.0573243	0.888402	0.963463	-1.77161	-0.00692775	0.981893	0.999801	-1.77164	-0.0514137	0.895445	0.958582
5730559C18Rik|ENSMUSG00000041605	0.700717	0.00286497	0.987335	0.999487	0.700731	0.210954	0.197919	0.499304	0.700689	0.265509	0.161687	0.438044	0.700673	-0.0517651	0.703874	0.999801	0.700716	0.202972	0.25303	0.523328
Gpr25|ENSMUSG00000052759	2.17283	0.161812	0.198419	0.896661	2.17252	-0.387089	0.00189513	0.0226348	2.17288	-0.177721	0.181628	0.465747	2.17291	-0.0539144	0.587694	0.999801	2.17269	-0.232554	0.064812	0.228951
Gm26781|ENSMUSG00000097433	-1.7792	0.365759	0.433719	0.977718	-1.77923	0.383106	0.354847	0.666946	NA	NA	NA	NA	-1.77921	0.336436	0.344573	0.999801	-1.77929	0.736112	0.106694	0.317865
Camsap2|ENSMUSG00000041570	7.66497	0.022335	0.617395	0.987917	7.66489	-0.0823505	0.0495906	0.222614	7.66501	-0.0468532	0.323216	0.635234	7.66503	-0.0170793	0.628772	0.999801	7.66504	-0.0641026	0.149183	0.388209
9230116N13Rik|ENSMUSG00000097403	-1.54139	0.356746	0.266773	0.938319	-1.54153	0.014693	0.958694	0.988167	-1.54138	-0.18106	0.598465	0.828651	-1.54139	0.534773	0.041893	0.967681	-1.54155	0.385167	0.23094	0.496636
Ddx59|ENSMUSG00000026404	3.38358	-0.10346	0.257748	0.935211	3.38337	-0.172437	0.0460217	0.212171	3.38361	-0.225366	0.0242432	0.133076	3.38363	-0.0587005	0.417374	0.999801	3.38361	-0.278689	0.00365594	0.0277631
Kif14|ENSMUSG00000041498	-0.971294	0.445362	0.189509	0.896661	-0.971417	-0.436555	0.15928	0.44223	-0.971294	0.507506	0.163387	0.440129	-0.971298	-0.512941	0.048929	0.979897	-0.971378	0.0193623	0.95416	0.982496
Zfp281|ENSMUSG00000041483	5.92592	0.0131925	0.797795	0.994794	5.92585	0.0494269	0.307894	0.622493	5.92595	0.0853302	0.122704	0.373452	5.92597	-0.0299955	0.456441	0.999801	5.926	0.0591801	0.251362	0.521581
Gm19705|ENSMUSG00000097113	-0.502291	-0.149805	0.544936	0.984789	-0.502219	0.272676	0.22824	0.53721	-0.502317	0.141205	0.581385	0.818676	-0.502328	-0.0291969	0.873207	0.999801	-0.502244	0.118038	0.622574	0.824791
A430106G13Rik|ENSMUSG00000098206	-0.182467	0.00408469	0.987338	0.999487	-0.182571	0.411043	0.0827988	0.304056	-0.182474	0.328768	0.224014	0.524722	-0.182496	0.077758	0.684579	0.999801	-0.182612	0.405889	0.1146	0.332122
Ptprc|ENSMUSG00000026395	2.5874	-0.0778447	0.457546	0.978545	2.58741	-0.0311671	0.748706	0.907418	2.58736	-0.0813914	0.460797	0.744752	2.58735	-0.0318767	0.697201	0.999801	2.58729	-0.116674	0.258429	0.529433
Nek7|ENSMUSG00000026393	5.7677	0.12563	0.0175096	0.501835	5.76766	-0.0107051	0.821907	0.937458	5.7677	0.0964091	0.0768787	0.28533	5.76769	0.0150884	0.704125	0.999801	5.76768	0.114056	0.0273573	0.12605
2310009B15Rik|ENSMUSG00000079283	1.76326	-0.0292749	0.823528	0.994968	1.76315	-0.0522983	0.670208	0.870928	1.76326	-0.17594	0.203165	0.496736	1.76327	0.0968941	0.353182	0.999801	1.7632	-0.0820678	0.529417	0.764337
Dennd1b|ENSMUSG00000056268	3.03696	0.00711895	0.938631	0.997501	3.03689	-0.0439428	0.613976	0.840862	3.03696	0.010658	0.912913	0.972397	3.03697	-0.0506396	0.490232	0.999801	3.0369	-0.0405338	0.655307	0.845101
Crb1|ENSMUSG00000063681	1.01236	0.38779	0.0898744	0.790738	1.01261	1.01063	1.91002e-05	0.000598624	1.01223	1.5753	2.01759e-07	1.20437e-05	1.01214	-0.184518	0.250443	0.999801	1.01201	1.40444	5.71959e-07	2.21201e-05
Zbtb41|ENSMUSG00000033964	5.34747	0.0115361	0.832662	0.994968	5.34742	-0.064879	0.204741	0.508227	5.3475	-0.0560325	0.332228	0.643424	5.34751	-0.00187001	0.965418	0.999801	5.34751	-0.0560745	0.300466	0.572916
Aspm|ENSMUSG00000033952	0.185933	-0.294807	0.137582	0.854025	0.18562	-0.120757	0.512122	0.783565	0.186004	-0.492364	0.0219729	0.123992	0.186023	0.0641479	0.701835	0.999801	0.185826	-0.417345	0.0324449	0.142868
Cfh|ENSMUSG00000026365	5.06635	-0.00836576	0.886288	0.996986	5.06639	0.0351871	0.519589	0.788296	5.06631	0.0827859	0.190133	0.477905	5.06631	-0.0583489	0.213009	0.999801	5.06629	0.0228789	0.696042	0.867713
Kcnt2|ENSMUSG00000052726	4.34393	0.205698	0.0142643	0.461174	4.34408	0.558364	1.57742e-08	1.85563e-06	4.34386	0.676399	4.93369e-09	5.91077e-07	4.34381	0.0838426	0.170222	0.999801	4.34387	0.758593	8.89322e-11	1.67056e-08
Cdc73|ENSMUSG00000078284	3.14647	0.0843682	0.341977	0.968297	3.14633	-0.0805879	0.331252	0.643763	3.1465	0.0243551	0.797263	0.927065	3.14651	-0.0238795	0.737861	0.999801	3.14646	0.000208078	0.998129	0.999077
B3galt2|ENSMUSG00000033849	4.01877	0.110979	0.196593	0.896661	4.01872	0.170936	0.0382768	0.187949	4.01879	0.333084	0.000885427	0.0111784	4.01878	-0.0542569	0.423344	0.999801	4.01883	0.279317	0.00224849	0.0189806
Cdc73|ENSMUSG00000026361	6.17076	0.0215561	0.652082	0.991393	6.17063	-0.0293423	0.512157	0.783565	6.17079	-0.0160306	0.753999	0.90959	6.1708	0.00313798	0.934108	0.999801	6.17075	-0.0121108	0.799687	0.917786
Glrx2|ENSMUSG00000018196	4.71998	-0.0689428	0.280121	0.943213	4.72003	0.0530903	0.375126	0.684094	4.71996	0.0627286	0.356843	0.663274	4.71995	-0.0815564	0.103265	0.999801	4.72003	-0.0194156	0.761312	0.898314
Trove2|ENSMUSG00000018199	6.6107	-0.000643787	0.988793	0.999487	6.6106	-0.0536383	0.210675	0.515241	6.61073	-0.100711	0.0391807	0.183077	6.61075	0.0409972	0.259678	0.999801	6.61075	-0.0576006	0.206007	0.46635
Uchl5|ENSMUSG00000018189	4.75169	-0.0105576	0.866383	0.996633	4.75167	0.0245982	0.675215	0.873245	4.75168	-0.0519752	0.437058	0.729205	4.75168	0.0621963	0.215555	0.999801	4.75174	0.0121854	0.844935	0.938127
Rgs2|ENSMUSG00000026360	7.81336	-0.130928	0.108313	0.824692	7.81361	0.135281	0.0782126	0.293356	7.81338	0.0147695	0.860818	0.953299	7.8134	-0.0117441	0.852196	0.999801	7.81382	-0.00439457	0.956191	0.983521
Rgs13|ENSMUSG00000051079	-2.06175	0.653905	0.102505	0.813717	-2.06236	-1.57647	8.87612e-05	0.00207694	-2.06163	-2.03727	0.000229173	0.00389118	NA	NA	NA	NA	-2.06194	-0.919127	0.0300789	0.135094
Rgs1|ENSMUSG00000026358	-2.31607	0.949299	0.0749232	0.751177	-2.31619	-0.681756	0.153155	0.432453	NA	NA	NA	NA	NA	NA	NA	NA	NA	NA	NA	NA
Brinp3|ENSMUSG00000035131	4.32741	0.284751	0.00360671	0.246277	4.32746	0.224215	0.0111505	0.0815975	4.32737	0.423046	0.000128673	0.00247411	4.32734	0.0832974	0.237217	0.999801	4.32729	0.505305	4.02259e-06	0.000114333
Gm15443|ENSMUSG00000082588	0.793429	0.260669	0.142862	0.856329	0.793444	-0.13063	0.428172	0.725661	0.793438	0.166348	0.379135	0.683145	0.793439	-0.0437547	0.755753	0.999801	0.793414	0.126158	0.464866	0.716732
Pla2g4a|ENSMUSG00000056220	2.78389	-0.064879	0.554899	0.984789	2.78377	0.131922	0.208601	0.512844	2.78388	0.112556	0.329596	0.641323	2.78386	-0.0518972	0.53782	0.999801	2.78391	0.0568873	0.596597	0.809583
Ptgs2|ENSMUSG00000032487	1.44944	0.233631	0.0981715	0.808427	1.44915	-0.246467	0.0615558	0.252984	1.44952	-0.107648	0.477735	0.755591	1.44955	0.0920555	0.429471	0.999801	1.44945	-0.0206055	0.883965	0.954043
Gm15453|ENSMUSG00000081535	4.06902	0.0368186	0.744873	0.991393	4.06881	0.0261992	0.808206	0.932101	4.06902	0.0305215	0.797381	0.927082	4.06903	0.0281127	0.754228	0.999801	4.06878	0.0673387	0.55557	0.780566
BC003331|ENSMUSG00000006010	5.92739	-0.0377352	0.442324	0.977718	5.9273	-0.039966	0.385697	0.694178	5.9274	-0.100898	0.0521816	0.221391	5.92741	0.0185493	0.634948	0.999801	5.9274	-0.079915	0.100901	0.306303
Tpr|ENSMUSG00000006005	7.21426	0.0409554	0.359657	0.970269	7.21417	-0.10211	0.0151894	0.101351	7.21429	-0.0484854	0.306702	0.619801	7.21431	-0.016193	0.648637	0.999801	7.21431	-0.0652977	0.141368	0.37583
Hmcn1|ENSMUSG00000066842	2.45196	0.069975	0.597558	0.987824	2.45218	-0.29819	0.0200567	0.122676	2.45195	-0.180959	0.205473	0.499565	2.45196	-0.0515211	0.615506	0.999801	2.45219	-0.224454	0.0926098	0.289887
Ivns1abp|ENSMUSG00000023150	9.52325	-0.132985	0.050133	0.669924	9.52345	0.231629	0.000475223	0.00778812	9.5232	0.0721456	0.308343	0.621253	9.52318	0.0186301	0.710382	0.999801	9.52338	0.0938956	0.153881	0.395376
Swt1|ENSMUSG00000052748	3.99458	0.154045	0.0380847	0.614628	3.99469	-0.0427319	0.54287	0.800637	3.99461	0.149552	0.0587277	0.239031	3.99462	-0.038107	0.520001	0.999801	3.99477	0.109508	0.142103	0.376886
Trmt1l|ENSMUSG00000053286	4.92929	0.102583	0.0872274	0.785838	4.92922	0.016796	0.76582	0.913706	4.92931	0.116182	0.0689913	0.265848	4.92932	0.00200103	0.966879	0.999801	4.92927	0.115452	0.0543615	0.204448
Rnf2|ENSMUSG00000026484	5.21208	0.0364555	0.519287	0.984789	5.21203	0.149492	0.00452128	0.0428313	5.21207	0.186321	0.00202551	0.0213152	5.21206	-0.00707094	0.874118	0.999801	5.21201	0.180871	0.0013161	0.0126177
Fam129a|ENSMUSG00000026483	0.953487	0.276275	0.0956011	0.800838	0.953598	-0.00583915	0.969325	0.991552	0.953476	0.211579	0.228149	0.529483	0.95347	0.052246	0.679621	0.999801	0.953599	0.262098	0.110632	0.32575
Edem3|ENSMUSG00000043019	6.12419	0.056938	0.235878	0.92362	6.12415	0.000742028	0.986905	0.996546	6.1242	0.042098	0.41146	0.706739	6.12421	0.0125276	0.74206	0.999801	6.12423	0.0538456	0.260687	0.531877
1700025G04Rik|ENSMUSG00000032666	6.09479	0.0644796	0.180408	0.882756	6.09489	0.267625	1.54778e-07	1.18147e-05	6.09475	0.351593	9.69854e-09	1.03847e-06	6.09472	-0.0222104	0.558264	0.999801	6.09468	0.325963	1.00728e-08	7.79112e-07
Tsen15|ENSMUSG00000014980	3.15199	0.113196	0.207365	0.90156	3.1519	0.133008	0.113508	0.3679	3.15197	0.187234	0.0475934	0.208032	3.15195	0.0564346	0.425941	0.999801	3.15179	0.244936	0.00585052	0.040148
Colgalt2|ENSMUSG00000032649	2.24276	-0.221736	0.0560384	0.69346	2.24279	0.257531	0.0222557	0.131265	2.24273	0.0767695	0.526116	0.787559	2.24273	-0.0433376	0.636157	0.999801	2.24266	0.0276188	0.807021	0.921205
Rgl1|ENSMUSG00000026482	6.70797	-0.0116162	0.798318	0.994794	6.70811	0.265449	3.50268e-08	3.53874e-06	6.70792	0.330226	3.24596e-09	4.24502e-07	6.7079	-0.0792199	0.0281584	0.8747	6.70791	0.24606	3.91153e-07	1.63481e-05
Gm7278|ENSMUSG00000080950	0.236122	-0.249436	0.206102	0.900656	0.23596	0.155924	0.396779	0.70261	0.236106	-0.0905289	0.668396	0.867534	0.236106	-0.00118228	0.994017	0.999801	0.235912	-0.103389	0.598146	0.81083
Arpc5|ENSMUSG00000008475	4.86242	0.126859	0.0389872	0.616509	4.8624	0.172042	0.00275581	0.0297119	4.8624	0.295766	6.4807e-06	0.000207528	4.86239	0.00130946	0.978562	0.999801	4.86237	0.291442	2.07251e-06	6.48856e-05
Ncf2|ENSMUSG00000026480	1.43752	-0.03249	0.817366	0.994968	1.43756	-0.0329472	0.804344	0.930253	1.43748	0.11747	0.433723	0.726775	1.43747	-0.180463	0.111566	0.999801	1.43739	-0.0663522	0.636989	0.832583
Smg7|ENSMUSG00000042772	6.66751	0.0183172	0.688634	0.991393	6.66756	-0.0405585	0.344867	0.658047	6.66752	0.020546	0.672987	0.870959	6.66754	-0.0449544	0.215162	0.999801	6.66763	-0.0272129	0.549424	0.777011
Nmnat2|ENSMUSG00000042751	6.98085	-0.00474137	0.916221	0.997217	6.98095	0.128157	0.00238034	0.026703	6.98083	0.063271	0.187918	0.474559	6.98082	0.056675	0.113081	0.999801	6.98091	0.117477	0.00909273	0.05601
Lamc2|ENSMUSG00000026479	2.18968	0.382936	0.0116669	0.42008	2.18963	0.629954	4.88875e-05	0.00127026	2.18964	0.777769	1.47864e-05	0.000413248	2.18958	0.233775	0.0470086	0.976258	2.18921	1.01438	5.90296e-08	3.40896e-06
Gm8818|ENSMUSG00000079138	-1.50269	0.0534002	0.856334	0.996047	-1.50274	0.0281062	0.915344	0.972295	-1.50267	-0.0393038	0.901497	0.969018	-1.50267	0.126422	0.591956	0.999801	-1.50267	0.0724101	0.805356	0.920361
Lamc1|ENSMUSG00000026478	5.67961	0.00857013	0.868029	0.996817	5.67962	-0.0729928	0.132231	0.400329	5.67961	-0.105063	0.0528464	0.223161	5.67962	0.0367045	0.363957	0.999801	5.67965	-0.0646434	0.206602	0.467088
Shcbp1l|ENSMUSG00000042708	2.02913	-0.137154	0.259347	0.935211	2.02932	0.0607134	0.591763	0.830242	2.02909	0.00792533	0.950726	0.984052	2.02909	-0.0892655	0.344487	0.999801	2.02916	-0.0749358	0.532574	0.76625
Dhx9|ENSMUSG00000042699	7.36301	-0.0148411	0.739611	0.991393	7.3629	-0.0299364	0.473247	0.757575	7.36304	-0.0382313	0.420885	0.714845	7.36306	-0.0125927	0.723286	0.999801	7.36301	-0.0482701	0.278494	0.549276
Npl|ENSMUSG00000042684	3.1008	-0.215833	0.0406956	0.623461	3.10102	0.199336	0.0441663	0.206917	3.10077	0.122397	0.259557	0.56866	3.10076	-0.143094	0.0768849	0.999801	3.10104	-0.0243373	0.808418	0.92151
Rgs8|ENSMUSG00000042671	8.31426	-0.0219676	0.622993	0.988711	8.3142	-0.142637	0.000662246	0.010018	8.3143	-0.213818	2.26064e-05	0.000577932	8.31433	0.0470763	0.185437	0.999801	8.31437	-0.171825	0.000170461	0.00242216
Rgs16|ENSMUSG00000026475	2.17038	-0.0223426	0.878332	0.996828	2.17048	0.700588	1.47989e-05	0.000485061	2.17032	1.02958	1.42851e-07	9.13177e-06	2.17028	-0.358353	0.00259343	0.390628	2.17017	0.670098	5.70216e-05	0.000988568
Rnasel|ENSMUSG00000066800	1.95377	0.274138	0.025418	0.548041	1.95366	-0.205456	0.0691718	0.273549	1.95381	0.051929	0.692341	0.879823	1.95382	0.0118097	0.905351	0.999801	1.95378	0.0638677	0.598706	0.810958
Rgsl1|ENSMUSG00000042641	0.303063	0.227142	0.375387	0.970818	0.30302	0.0463828	0.843598	0.945497	0.303058	0.209255	0.436345	0.729171	0.303062	0.0629018	0.746365	0.999801	0.302882	0.277486	0.276192	0.547706
Glul|ENSMUSG00000026473	10.6013	-0.0417735	0.373077	0.970798	10.6014	0.0724885	0.101698	0.343788	10.6013	0.0428931	0.386823	0.688663	10.6013	-0.0161375	0.660455	0.999801	10.6014	0.0296166	0.528368	0.763733
5830403L16Rik|ENSMUSG00000045968	-0.6756	0.439101	0.131574	0.853098	-0.675689	-0.0521446	0.837945	0.943154	-0.675584	0.274876	0.365667	0.670352	-0.675592	0.107922	0.624638	0.999801	-0.67569	0.382007	0.174486	0.424699
A930039A15Rik|ENSMUSG00000078493	0.112239	0.167052	0.464276	0.978767	0.112168	-0.327249	0.139373	0.412498	0.112238	0.0179541	0.940224	0.981775	0.112244	-0.186793	0.304359	0.999801	0.112191	-0.156251	0.497588	0.743771
Cacna1e|ENSMUSG00000004110	8.52361	-0.0526252	0.241028	0.927047	8.52356	-0.26832	5.48559e-09	7.78636e-07	8.52366	-0.263311	6.42658e-08	4.74569e-06	8.5237	-0.0613351	0.0846856	0.999801	8.52373	-0.327629	2.61483e-10	3.96609e-08
Ier5|ENSMUSG00000056708	5.84811	-0.120878	0.147489	0.857574	5.84813	-0.0134034	0.86038	0.952494	5.84814	-0.148685	0.0935405	0.319714	5.84816	0.0063122	0.921544	0.999801	5.84837	-0.145058	0.0836736	0.271079
Mr1|ENSMUSG00000026471	2.18438	-0.00926232	0.938911	0.997501	2.18439	-0.0344677	0.75777	0.910977	2.18438	-0.0938931	0.464546	0.74732	2.18437	0.0437322	0.640974	0.999801	2.1844	-0.0457264	0.705805	0.871608
Stx6|ENSMUSG00000026470	6.51209	-0.028469	0.53908	0.984789	6.51211	0.0145689	0.735307	0.902485	6.51208	-0.00977964	0.842387	0.946833	6.51209	-0.00784401	0.829801	0.999801	6.51214	-0.0201834	0.661843	0.849174
BC034090|ENSMUSG00000033722	3.12725	0.0709028	0.431316	0.977718	3.12719	-0.14372	0.0938468	0.327561	3.12725	0.00697192	0.941293	0.981779	3.12726	-0.0813567	0.256172	0.999801	3.1273	-0.0737766	0.413275	0.675938
Xpr1|ENSMUSG00000026469	7.63346	-0.025131	0.576207	0.984804	7.63352	0.170561	5.28378e-05	0.00135852	7.63344	0.199778	2.87399e-05	0.000713581	7.63343	-0.058522	0.0967541	0.999801	7.63345	0.137414	0.00227369	0.0191555
Acbd6|ENSMUSG00000033701	4.70995	0.0925249	0.147352	0.857574	4.70992	-0.0317256	0.593342	0.830601	4.70994	0.0405028	0.551744	0.802286	4.70993	0.0175946	0.728097	0.999801	4.70986	0.0547943	0.39177	0.659794
Qsox1|ENSMUSG00000033684	4.52862	0.0845038	0.203824	0.899998	4.52872	0.219676	0.000414556	0.00699411	4.52859	0.259364	0.000237435	0.00400654	4.52856	0.0402354	0.445284	0.999801	4.52859	0.303388	4.04458e-06	0.000114467
Cep350|ENSMUSG00000033671	6.43344	0.0599992	0.195592	0.896661	6.43345	-0.0522909	0.229792	0.53909	6.43346	0.0292904	0.552229	0.802349	6.43348	-0.0231988	0.529841	0.999801	6.43353	0.00334704	0.942229	0.978581
Tor1aip2|ENSMUSG00000050565	5.7973	0.0111851	0.824548	0.994968	5.79723	0.0166745	0.72448	0.897177	5.79732	0.0204339	0.701094	0.885376	5.79733	0.00508063	0.89813	0.999801	5.79737	0.0227353	0.649628	0.841651
Tor1aip1|ENSMUSG00000026466	5.46918	0.0121867	0.819365	0.994968	5.46916	0.0275672	0.57999	0.824591	5.46918	0.0140052	0.804492	0.930103	5.46918	0.0212916	0.611436	0.999801	5.4692	0.0349949	0.509418	0.7519
Fam163a|ENSMUSG00000015484	3.27693	-0.0440037	0.646862	0.991393	3.27706	-0.134555	0.142857	0.417578	3.27693	-0.257566	0.0157346	0.0981307	3.27695	0.0761636	0.322354	0.999801	3.27717	-0.183827	0.0608773	0.219961
Tdrd5|ENSMUSG00000060985	-0.232155	0.310178	0.202752	0.898703	-0.232018	1.00556	1.54133e-05	0.000501372	-0.23225	1.04623	4.36621e-05	0.00101357	-0.232309	0.268062	0.119205	0.999801	-0.232383	1.32179	4.09985e-07	1.68469e-05
Gm2000|ENSMUSG00000078193	5.66296	-0.0415446	0.419315	0.977718	5.66292	0.0720587	0.137683	0.409403	5.66294	0.000889601	0.986978	0.995813	5.66294	0.0259414	0.522449	0.999801	5.66291	0.0293759	0.566633	0.789616
Axdnd1|ENSMUSG00000026601	-1.38149	0.192141	0.563151	0.984789	-1.38156	0.529907	0.0847657	0.308967	-1.38149	0.230532	0.498573	0.770723	-1.38151	0.483376	0.0643024	0.999801	-1.38156	0.72552	0.0266607	0.123674
Soat1|ENSMUSG00000026600	5.11312	0.0912071	0.155443	0.867232	5.1134	0.246678	0.000201353	0.00395228	5.11309	0.252736	0.000703293	0.00933293	5.11307	0.0854358	0.0930936	0.999801	5.1133	0.334541	7.44708e-06	0.000189154
Gm10031|ENSMUSG00000096493	5.59516	0.0268335	0.60574	0.987824	5.59505	-0.133901	0.00563104	0.0502365	5.59519	-0.090223	0.103423	0.338332	5.59522	-0.020331	0.622197	0.999801	5.59523	-0.115033	0.0260533	0.121682
Abl2|ENSMUSG00000026596	6.83947	0.0396365	0.379911	0.971278	6.8395	-0.0990874	0.0189007	0.117744	6.8395	-0.0742186	0.122888	0.373729	6.83952	0.0123904	0.731396	0.999801	6.83958	-0.0638159	0.156192	0.398834
Tor3a|ENSMUSG00000060519	2.97709	0.0885852	0.349519	0.969791	2.97703	-0.00465728	0.957621	0.987611	2.97708	0.0276053	0.783422	0.921496	2.97708	0.0547004	0.462711	0.999801	2.977	0.0723951	0.445942	0.702583
Fam20b|ENSMUSG00000033557	6.93345	-0.0264925	0.558065	0.984789	6.93357	0.173798	4.19693e-05	0.00112278	6.93342	0.138387	0.00411993	0.0366283	6.9334	0.00581893	0.87062	0.999801	6.93347	0.143638	0.00145787	0.0135661
Angptl1|ENSMUSG00000033544	-0.429364	0.138511	0.603069	0.987824	-0.429486	-0.0138773	0.956507	0.98703	-0.429368	0.00056624	0.998	0.99905	-0.429389	0.116301	0.576564	0.999801	-0.429296	0.129509	0.624261	0.825746
Ralgps2|ENSMUSG00000026594	6.11541	-0.110282	0.0219196	0.521742	6.11538	-0.0321619	0.475527	0.758679	6.11542	-0.138625	0.00676681	0.0526318	6.11544	-0.00823682	0.828749	0.999801	6.11548	-0.14783	0.00203935	0.017621
Rasal2|ENSMUSG00000070565	6.50915	0.0247097	0.594486	0.987824	6.50906	-0.0575324	0.184467	0.480834	6.50917	-0.0228503	0.641987	0.854468	6.50919	-0.014586	0.689777	0.999801	6.50917	-0.0380541	0.407992	0.672992
2810025M15Rik|ENSMUSG00000049881	2.7809	0.0775459	0.436619	0.977718	2.78087	0.0440587	0.631905	0.850626	2.78092	0.0209208	0.843016	0.946866	2.78092	0.0951867	0.223568	0.999801	2.78097	0.114905	0.243985	0.512746
BC026585|ENSMUSG00000033488	3.01061	-0.0186798	0.84114	0.994968	3.01061	0.134684	0.119901	0.379063	3.01058	0.10361	0.291787	0.603951	3.01058	0.0106057	0.884435	0.999801	3.01057	0.112855	0.22237	0.486221
Sec16b|ENSMUSG00000026589	-1.59874	-0.336289	0.338628	0.967444	-1.59893	0.0822957	0.793622	0.926522	-1.59873	-0.622849	0.102398	0.336878	-1.59872	0.343071	0.221009	0.999801	-1.59888	-0.271743	0.423552	0.684912
Brinp2|ENSMUSG00000004031	5.70193	0.0650538	0.202243	0.898703	5.70195	0.0733765	0.12464	0.387115	5.70192	0.131449	0.0172458	0.104623	5.70192	0.00738395	0.855649	0.999801	5.70197	0.130259	0.0112718	0.0660296
Astn1|ENSMUSG00000026587	7.97521	0.0310892	0.485053	0.979651	7.97517	-0.043695	0.296302	0.61129	7.97522	0.0166142	0.725269	0.895765	7.97523	-0.0326461	0.35552	0.999801	7.97522	-0.0161859	0.715808	0.876033
Rfwd2|ENSMUSG00000040782	4.38335	-0.0109615	0.874378	0.996817	4.38338	0.0884999	0.170993	0.460458	4.38334	0.0671138	0.360979	0.666438	4.38333	0.0053653	0.921089	0.999801	4.38337	0.0715094	0.298584	0.570534
Tnr|ENSMUSG00000015829	5.6228	0.0997741	0.0735597	0.745559	5.62276	-0.185758	0.000765725	0.0113178	5.62282	-0.0638076	0.278345	0.589882	5.62283	-0.0250109	0.564066	0.999801	5.62282	-0.0900153	0.103848	0.311919
4930523C07Rik|ENSMUSG00000090394	-0.6586	-0.191326	0.447878	0.977718	-0.658369	0.261336	0.273937	0.589286	-0.658623	0.0286733	0.914166	0.972638	-0.65863	0.039707	0.837097	0.999801	-0.65844	0.061755	0.80206	0.918933
Mrps14|ENSMUSG00000058267	4.68184	-0.0562247	0.380303	0.971278	4.68177	-0.0474058	0.426175	0.723906	4.68186	-0.0691485	0.309845	0.622743	4.68188	-0.0399442	0.432017	0.999801	4.68191	-0.109555	0.0866125	0.277153
Cacybp|ENSMUSG00000014226	6.26897	-0.0453635	0.338292	0.967444	6.26892	0.0865564	0.0501179	0.22416	6.26898	0.0638684	0.206953	0.501417	6.26898	-0.0278183	0.458758	0.999801	6.269	0.0348812	0.459758	0.712552
Rabgap1l|ENSMUSG00000026721	6.87699	-0.0263767	0.560155	0.984789	6.87699	0.0416568	0.326691	0.640568	6.87698	0.0751505	0.119172	0.368347	6.87699	-0.0649787	0.0690161	0.999801	6.877	0.0130454	0.772529	0.904777
Rc3h1|ENSMUSG00000040423	4.04428	0.083755	0.259619	0.935211	4.04423	-0.0160244	0.817657	0.935666	4.0443	0.0749151	0.344254	0.653781	4.04431	-0.0104103	0.859419	0.999801	4.04432	0.0609433	0.412051	0.675112
Gas5|ENSMUSG00000053332	6.96071	0.0352645	0.434721	0.977718	6.96066	0.0652544	0.125505	0.388669	6.9607	0.0085561	0.857786	0.951909	6.9607	0.0879521	0.0184831	0.779205	6.96067	0.100773	0.0300144	0.134875
Zbtb37|ENSMUSG00000043467	3.60611	-0.073047	0.368234	0.970269	3.60613	0.0324106	0.671807	0.871654	3.6061	0.0418552	0.625404	0.845119	3.6061	-0.0870838	0.173119	0.999801	3.60611	-0.0466584	0.560128	0.784383
Dars2|ENSMUSG00000026709	4.16982	-0.0348775	0.627837	0.98988	4.16972	0.0348948	0.602585	0.835009	4.16982	0.0289812	0.706134	0.887694	4.16982	-0.035305	0.537599	0.999801	4.16976	-0.00814071	0.909458	0.965327
Cenpl|ENSMUSG00000026708	0.623535	-0.0156791	0.929978	0.997501	0.623314	0.0700994	0.670383	0.87094	0.623575	-0.0111865	0.953146	0.984505	0.623582	0.0567162	0.696158	0.999801	0.623484	0.048564	0.783547	0.909577
Klhl20|ENSMUSG00000026705	4.56907	-0.0124267	0.850812	0.995703	4.56909	0.136152	0.0281749	0.153571	4.56906	0.106306	0.128758	0.383862	4.56905	0.0121402	0.816069	0.999801	4.56909	0.119228	0.0685451	0.237766
Ankrd45|ENSMUSG00000044835	5.44277	0.110542	0.0387561	0.615196	5.44272	0.14383	0.00381328	0.0378033	5.44276	0.260538	4.56058e-06	0.000155715	5.44274	-0.00974947	0.817798	0.999801	5.44268	0.245253	3.8444e-06	0.000110077
Prdx6|ENSMUSG00000026701	7.96162	-0.00226101	0.959863	0.999487	7.96162	0.021034	0.614939	0.841131	7.96161	-0.0532137	0.262294	0.571707	7.96161	0.0692598	0.0495728	0.98091	7.96166	0.0127105	0.776871	0.906945
Gm15429|ENSMUSG00000040323	3.84634	0.0808131	0.297001	0.943786	3.8463	-0.0549207	0.443075	0.737795	3.84635	0.0292289	0.720606	0.894402	3.84635	-0.0057248	0.924902	0.999801	3.84635	0.0197832	0.796705	0.915807
Suco|ENSMUSG00000040297	5.9993	-0.071504	0.141068	0.856228	5.99929	0.00893791	0.843886	0.945556	5.99932	-0.0879346	0.0901058	0.312693	5.99933	0.0192498	0.61892	0.999801	5.99939	-0.0627189	0.193615	0.449743
Pigc|ENSMUSG00000026698	4.02792	-0.111256	0.132056	0.853561	4.02796	0.0537504	0.44075	0.736084	4.02791	-0.0282683	0.716763	0.892428	4.02792	-0.032246	0.586743	0.999801	4.02798	-0.0610352	0.400555	0.666902
Dnm3|ENSMUSG00000040265	8.00731	-0.0307456	0.490515	0.981087	8.00729	-0.0314247	0.453492	0.7438	8.00731	-0.0389149	0.410615	0.706575	8.00732	-0.0273223	0.43966	0.999801	8.00735	-0.0656519	0.139876	0.373308
Mettl13|ENSMUSG00000026694	4.25513	0.0131253	0.853604	0.996047	4.25515	0.0839072	0.207232	0.511611	4.25511	0.130911	0.0812069	0.294068	4.25511	-0.0387847	0.486411	0.999801	4.25509	0.0919708	0.19352	0.449718
Vamp4|ENSMUSG00000026696	6.65723	-0.0458052	0.318109	0.954943	6.65723	0.0901292	0.0352151	0.17851	6.65721	0.0901462	0.0650182	0.255421	6.65721	-0.0510475	0.158413	0.999801	6.65721	0.0381909	0.402858	0.669108
Myoc|ENSMUSG00000026697	-1.95818	-0.125824	0.817691	0.994968	-1.95876	0.392652	0.421502	0.721261	NA	NA	NA	NA	NA	NA	NA	NA	NA	NA	NA	NA
Prrc2c|ENSMUSG00000040225	7.99433	0.0167992	0.705058	0.991393	7.99429	-0.0759127	0.0710218	0.277669	7.99435	-0.0715472	0.127698	0.3818	7.99437	0.0104031	0.768368	0.999801	7.99435	-0.0622755	0.15822	0.401856
Fmo1|ENSMUSG00000040181	3.43918	0.0436969	0.606047	0.987824	3.43926	0.0101489	0.897846	0.965108	3.43917	0.040866	0.649687	0.858385	3.43917	0.012255	0.856002	0.999801	3.4392	0.0438802	0.603515	0.813731
Fmo2|ENSMUSG00000040170	2.2833	0.125062	0.536261	0.984789	2.28334	0.125799	0.506214	0.779915	2.28325	0.442317	0.0409836	0.188188	2.28329	-0.186214	0.248079	0.999801	2.2832	0.231064	0.249617	0.519574
Prrx1|ENSMUSG00000026586	3.63277	-0.0183297	0.830387	0.994968	3.63288	0.0329351	0.682074	0.876538	3.63276	-0.00228234	0.979887	0.993677	3.63276	0.0171482	0.798993	0.999801	3.63294	0.0114995	0.892399	0.957659
Gorab|ENSMUSG00000040124	3.56061	0.0041201	0.959739	0.999487	3.5606	0.0881437	0.247298	0.560071	3.56061	0.110914	0.202224	0.494787	3.56061	-0.0234922	0.716402	0.999801	3.56063	0.0879275	0.278011	0.549018
Mettl11b|ENSMUSG00000040113	1.21047	0.371703	0.0281355	0.56264	1.21064	-0.053297	0.715755	0.893834	1.21046	0.27816	0.114014	0.358994	1.21047	0.0512378	0.68312	0.999801	1.2107	0.297833	0.0739635	0.249822
Kifap3|ENSMUSG00000026585	8.2836	0.0301088	0.500668	0.982515	8.28347	-0.041414	0.322049	0.636056	8.28362	-0.0258054	0.587426	0.821801	8.28363	0.00933175	0.792268	0.999801	8.2836	-0.0165859	0.710316	0.873159
Scyl3|ENSMUSG00000026584	5.37609	-0.0964522	0.0813906	0.769417	5.37602	-0.0621566	0.220785	0.527376	5.37609	-0.116913	0.0476123	0.208032	5.3761	-0.0486164	0.254865	0.999801	5.37607	-0.166383	0.00390933	0.0293
BC055324|ENSMUSG00000041406	1.60756	-0.135825	0.31876	0.955445	1.60749	-0.17718	0.170519	0.459688	1.60759	-0.303849	0.0350244	0.170756	1.60762	-0.0147248	0.893001	0.999801	1.60761	-0.314727	0.0199594	0.100319
Mettl18|ENSMUSG00000041396	2.50798	-0.156855	0.142922	0.856329	2.5078	0.0622286	0.529751	0.792936	2.50799	-0.108956	0.338909	0.649099	2.508	0.00779279	0.926733	0.999801	2.50779	-0.104104	0.328482	0.600631
F5|ENSMUSG00000026579	0.735995	-0.294671	0.462575	0.978767	0.735382	-0.440718	0.245942	0.558724	0.736076	-0.853393	0.059927	0.24254	0.736107	0.114196	0.738558	0.999801	0.735704	-0.714818	0.0857056	0.275075
Slc19a2|ENSMUSG00000040918	1.9235	-0.00653945	0.958422	0.999477	1.92342	0.0673259	0.564976	0.813914	1.9235	0.140695	0.287191	0.599421	1.9235	-0.0805406	0.417652	0.999801	1.92346	0.0508768	0.681749	0.859689
Ccdc181|ENSMUSG00000026578	4.72392	-0.048299	0.446987	0.977718	4.72385	0.0404348	0.493793	0.771904	4.72392	0.00174759	0.979364	0.993574	4.72393	-0.0154493	0.758883	0.999801	4.72388	-0.010865	0.863118	0.945708
Blzf1|ENSMUSG00000026577	4.72011	0.0287555	0.651292	0.991393	4.72013	0.0018319	0.975423	0.993534	4.72013	0.0081295	0.904758	0.970408	4.72014	0.0177841	0.723521	0.999801	4.72021	0.0244122	0.700232	0.86927
Nme7|ENSMUSG00000026575	3.26484	-0.0594508	0.495778	0.9825	3.26472	0.0286712	0.722093	0.896613	3.26485	0.00544569	0.953359	0.984505	3.26486	-0.0439756	0.52477	0.999801	3.26477	-0.0320466	0.712944	0.874614
Atp1b1|ENSMUSG00000026576	9.96663	-0.0126282	0.783542	0.99262	9.96655	-0.0265365	0.540575	0.799274	9.96665	-0.00181553	0.970336	0.990219	9.96666	-0.0408149	0.26548	0.999801	9.96667	-0.0438031	0.339355	0.610689
Sft2d2|ENSMUSG00000040848	6.00705	0.0761235	0.120093	0.841571	6.00711	0.0405946	0.374703	0.683976	6.00704	0.100528	0.0524243	0.221926	6.00704	0.0132099	0.730103	0.999801	6.00707	0.111552	0.0219174	0.107505
Tiprl|ENSMUSG00000040843	5.48564	0.0365531	0.489491	0.980691	5.48559	0.040619	0.410561	0.71195	5.48565	0.0434428	0.440241	0.731758	5.48565	0.0297122	0.47946	0.999801	5.48566	0.0700412	0.182905	0.436979
Gpr161|ENSMUSG00000040836	1.63128	0.29589	0.0305725	0.575172	1.63127	0.185672	0.13485	0.404619	1.63126	0.440599	0.00255815	0.0254508	1.63123	0.0376891	0.728235	0.999801	1.63103	0.481392	0.000578158	0.00651056
Dcaf6|ENSMUSG00000026571	6.6382	-0.0404531	0.378064	0.971278	6.63822	0.0536552	0.211777	0.516979	6.63819	0.0264179	0.589021	0.822726	6.6382	-0.0168262	0.64224	0.999801	6.63824	0.00664728	0.884677	0.954084
Mpc2|ENSMUSG00000026568	5.56766	-0.0748083	0.153599	0.86477	5.56765	0.0313824	0.518894	0.78823	5.56766	-0.051228	0.359608	0.664915	5.56766	0.00315588	0.939327	0.999801	5.56769	-0.0494307	0.343179	0.613694
Mpzl1|ENSMUSG00000026566	4.59144	0.0174886	0.789656	0.994794	4.59147	0.0379352	0.54099	0.799613	4.59142	0.0723244	0.296214	0.608555	4.5914	-0.0187	0.716733	0.999801	4.59148	0.0533362	0.412459	0.675212
Rcsd1|ENSMUSG00000040723	2.91954	0.0335906	0.724358	0.991393	2.91978	0.0249436	0.781694	0.921076	2.91949	0.087829	0.384841	0.687951	2.91948	-0.0282727	0.708387	0.999801	2.91968	0.0650978	0.490043	0.7374
Creg1|ENSMUSG00000040713	3.39501	-0.0493203	0.563433	0.984789	3.39506	0.179804	0.0237317	0.136867	3.39498	0.128111	0.156998	0.431455	3.39497	-0.00407664	0.951075	0.999801	3.39498	0.128004	0.13025	0.358937
RP23-36P10.7|ENSMUSG00000099187	0.969963	-0.0298929	0.854277	0.996047	0.96992	0.0572063	0.70802	0.891	0.969944	0.0711186	0.680107	0.87435	0.96994	-0.0514498	0.688955	0.999801	0.969842	0.0282116	0.860566	0.944677
Pou2f1|ENSMUSG00000026565	5.82261	0.00338593	0.946495	0.998531	5.82259	0.0149471	0.751025	0.908376	5.82262	0.0430587	0.419628	0.713658	5.82263	-0.030074	0.445011	0.999801	5.82261	0.011873	0.813395	0.923425
Dusp27|ENSMUSG00000026564	-1.40303	-0.260397	0.528111	0.984789	-1.403	0.241502	0.538204	0.797624	-1.40304	-0.261223	0.54112	0.796235	-1.40305	0.225733	0.48437	0.999801	-1.40292	-0.029658	0.93892	0.977519
Ildr2|ENSMUSG00000040612	5.91527	0.342919	1.40823e-06	0.00497163	5.9152	0.227551	0.000203213	0.00398423	5.91526	0.538649	6.95415e-10	1.19138e-07	5.91523	0.0268137	0.557536	0.999801	5.91499	0.566008	5.52862e-11	1.13863e-08
Tada1|ENSMUSG00000026563	5.6529	-0.0376021	0.465869	0.978767	5.65287	0.0690112	0.154111	0.433981	5.6529	0.0346789	0.524985	0.787048	5.6529	-0.00798778	0.844396	0.999801	5.65292	0.0256927	0.614973	0.819868
Pogk|ENSMUSG00000040596	6.79883	0.0563559	0.264572	0.937983	6.79888	0.0930229	0.0567636	0.241716	6.79882	0.129179	0.0193554	0.113289	6.7988	0.0161733	0.680715	0.999801	6.79887	0.147304	0.00565863	0.0391772
Gm16701|ENSMUSG00000097823	4.13208	0.0657861	0.362133	0.970269	4.13189	-0.247462	0.000233704	0.00443522	4.13212	-0.234509	0.00212887	0.0220209	4.13214	0.0465429	0.419666	0.999801	4.13208	-0.184051	0.0100362	0.0604292
Fam78b|ENSMUSG00000060568	5.39739	0.0884545	0.10306	0.813717	5.39733	-0.0875194	0.0828307	0.304108	5.3974	-0.0197258	0.730175	0.898403	5.39741	0.0178853	0.672942	0.999801	5.3974	-0.00684829	0.898733	0.959943
Uck2|ENSMUSG00000026558	3.02729	0.0350458	0.707194	0.991393	3.02725	0.0381321	0.655647	0.863685	3.02731	-0.043294	0.663197	0.865466	3.02732	0.111859	0.127791	0.999801	3.02734	0.066722	0.473061	0.724144
Tmco1|ENSMUSG00000052428	5.43277	-0.0240766	0.653019	0.991393	5.43271	0.032962	0.506595	0.780139	5.43278	-0.000272026	0.996184	0.998749	5.43278	0.00416725	0.921677	0.999801	5.4328	0.00324458	0.951319	0.981048
Aldh9a1|ENSMUSG00000026687	5.21117	0.0777815	0.167112	0.87426	5.21118	0.00549612	0.91728	0.972847	5.21116	0.0643401	0.280481	0.592435	5.21116	0.018757	0.674879	0.999801	5.21116	0.0769533	0.170908	0.420058
Mgst3|ENSMUSG00000026688	4.84907	0.0401414	0.516458	0.984789	4.84898	0.0884027	0.126501	0.390149	4.84907	0.105466	0.109329	0.349512	4.84907	0.0184984	0.705327	0.999801	4.84903	0.124687	0.0431666	0.17437
Rxrg|ENSMUSG00000015843	7.64028	-0.224331	0.00962183	0.382993	7.6404	-0.125255	0.109073	0.359702	7.64029	-0.37894	0.000112641	0.00221304	7.64032	0.0266691	0.682173	0.999801	7.64051	-0.360543	0.000117868	0.00179896
Pbx1|ENSMUSG00000052534	7.39508	0.032053	0.473159	0.978767	7.39509	-0.0210132	0.614133	0.840862	7.39509	-0.00896253	0.850658	0.949905	7.3951	0.0148029	0.676398	0.999801	7.39513	0.00438304	0.921735	0.970445
Nuf2|ENSMUSG00000026683	1.63607	-0.138643	0.314073	0.952987	1.63554	-0.0341392	0.787828	0.924371	1.63615	-0.40233	0.00758405	0.0573642	1.63616	0.215559	0.050541	0.985932	1.63593	-0.179525	0.191051	0.446378
Rgs5|ENSMUSG00000026678	7.11668	-0.0520653	0.442205	0.977718	7.11671	-0.0508009	0.415388	0.715153	7.11666	-0.0924891	0.198806	0.4907	7.11666	-0.0184109	0.72179	0.999801	7.11674	-0.10082	0.133936	0.364216
Rgs4|ENSMUSG00000038530	10.1032	-0.309822	0.00417519	0.26885	10.1034	0.0324688	0.722873	0.896821	10.1032	-0.146666	0.181019	0.46509	10.1032	-0.13946	0.084696	0.999801	10.1035	-0.285079	0.00702381	0.0460372
1700084C01Rik|ENSMUSG00000070532	3.50069	-0.0682393	0.5218	0.984789	3.5006	0.00566789	0.954936	0.986265	3.50069	-0.131487	0.247894	0.553777	3.50068	0.0631588	0.455732	0.999801	3.50078	-0.0708712	0.498921	0.745048
Hsd17b7|ENSMUSG00000026675	4.31872	0.110378	0.162314	0.871901	4.31868	-0.247944	0.001963	0.0231715	4.31875	-0.0571678	0.493314	0.766572	4.31877	-0.0847639	0.186434	0.999801	4.31884	-0.141078	0.0784789	0.259696
3110045C21Rik|ENSMUSG00000097503	-0.655425	-0.0772631	0.769254	0.9915	-0.655363	0.33514	0.185019	0.481396	-0.655458	0.326375	0.238806	0.542316	-0.655471	-0.0748147	0.718416	0.999801	-0.655456	0.250574	0.325572	0.598164
Ddr2|ENSMUSG00000026674	2.44565	-0.151379	0.167314	0.87426	2.44564	0.0439881	0.666756	0.869265	2.44564	-0.108495	0.345227	0.654395	2.44564	-0.00521816	0.950798	0.999801	2.44572	-0.113023	0.291958	0.564389
Uap1|ENSMUSG00000026670	5.51453	0.0540172	0.308753	0.949368	5.51454	0.106776	0.0296887	0.159295	5.51451	0.137728	0.0149755	0.0946368	5.5145	0.0180564	0.664767	0.999801	5.5145	0.152778	0.00391318	0.0293
Uhmk1|ENSMUSG00000026667	8.50917	0.0441931	0.322641	0.958805	8.5091	-0.0564519	0.178639	0.472238	8.50919	-0.0615899	0.194573	0.48425	8.5092	0.0462284	0.194761	0.999801	8.50919	-0.0164093	0.712918	0.874614
Gm6345|ENSMUSG00000096964	-1.30026	0.0327003	0.92406	0.997501	-1.30038	-0.108065	0.731624	0.900653	-1.30028	0.149902	0.678749	0.873457	-1.30028	-0.238342	0.374622	0.999801	-1.30038	-0.0743749	0.828058	0.930045
Gm7694|ENSMUSG00000096603	2.24649	0.0807093	0.486623	0.980627	2.24666	0.283789	0.00996223	0.075375	2.24645	0.323969	0.00966928	0.0685938	2.24642	0.0410636	0.645163	0.999801	2.24648	0.360217	0.00249783	0.020667
Nos1ap|ENSMUSG00000038473	5.31963	0.0746862	0.174306	0.878398	5.31963	-0.077273	0.130246	0.396766	5.31965	-0.00582109	0.920637	0.975304	5.31966	0.000860536	0.984236	0.999801	5.31968	-0.00877052	0.872193	0.949514
Olfml2b|ENSMUSG00000038463	2.06833	-0.00495103	0.966947	0.999487	2.06833	-0.0660231	0.560225	0.810808	2.06833	-0.00332548	0.978716	0.993386	2.06833	-0.0721559	0.444045	0.999801	2.06838	-0.0705431	0.551181	0.778053
Atf6|ENSMUSG00000026663	7.14499	-0.171459	0.00283582	0.219924	7.14509	0.00342033	0.944923	0.982567	7.14499	-0.0751614	0.192493	0.480937	7.145	-0.0984175	0.0244622	0.845086	7.14512	-0.173079	0.00256495	0.0210997
Gm9929|ENSMUSG00000053925	-0.78927	-0.0687045	0.80725	0.994794	-0.789093	0.212025	0.430211	0.72779	-0.789322	0.290599	0.314973	0.627669	-0.789351	-0.161786	0.444601	0.999801	-0.789384	0.149542	0.589002	0.8038
Dusp12|ENSMUSG00000026659	4.23828	-0.153309	0.0305456	0.575172	4.23833	-0.0398131	0.549712	0.803756	4.23828	-0.189972	0.0117489	0.0792762	4.23829	-0.00748223	0.893953	0.999801	4.23839	-0.197168	0.00511165	0.036332
Fcrlb|ENSMUSG00000070524	-1.70475	0.586875	0.111471	0.828835	-1.70499	-0.480155	0.143695	0.418938	-1.70474	0.216678	0.579746	0.817805	-1.70474	-0.115423	0.686273	0.999801	-1.70495	0.0906993	0.808077	0.92151
Gm2962|ENSMUSG00000089838	4.16772	-0.000592794	0.993448	0.999487	4.16762	-0.032047	0.63239	0.850932	4.16773	0.038242	0.619379	0.841291	4.16775	-0.0747686	0.190414	0.999801	4.1677	-0.036729	0.613338	0.819252
Fcgr2b|ENSMUSG00000026656	1.93536	-0.218715	0.108925	0.825182	1.9355	0.0451659	0.718313	0.894992	1.93531	-0.0611414	0.666655	0.866727	1.9353	-0.117256	0.277532	0.999801	1.93526	-0.175262	0.189435	0.444561
Fcgr4|ENSMUSG00000059089	-2.00428	-0.352869	0.380478	0.971278	-2.00436	-0.23785	0.530858	0.793574	-2.00429	-0.0643145	0.878682	0.959321	NA	NA	NA	NA	-2.00443	-0.605257	0.143075	0.378302
Fcgr3|ENSMUSG00000059498	3.97736	-0.158486	0.0381071	0.614628	3.97746	0.0829933	0.238422	0.550316	3.97733	-0.065744	0.405297	0.70262	3.97733	-0.0103547	0.860794	0.999801	3.9774	-0.0782413	0.290196	0.562707
1700009P17Rik|ENSMUSG00000026649	0.0227267	0.129663	0.55358	0.984789	0.0220851	0.0121797	0.951798	0.985272	0.0227915	0.0310929	0.894356	0.965707	0.0227924	0.100297	0.56987	0.999801	0.0224728	0.135679	0.543646	0.774236
Sdhc|ENSMUSG00000058076	6.49326	-0.0268033	0.561548	0.984789	6.49317	-0.046571	0.2813	0.596755	6.49328	-0.103162	0.0349199	0.170538	6.49329	0.0272593	0.458216	0.999801	6.49328	-0.0783514	0.0874934	0.279179
Mpz|ENSMUSG00000056569	-1.8395	-0.542744	0.261826	0.936638	-1.83973	-0.586073	0.202025	0.505388	-1.83944	-1.21906	0.0309761	0.157379	NA	NA	NA	NA	-1.83939	-1.13876	0.0255696	0.120112
Pcp4l1|ENSMUSG00000038370	9.25736	-0.0420268	0.358484	0.970269	9.25745	0.0391115	0.362552	0.674222	9.25734	0.0162252	0.739302	0.902207	9.25734	-0.0233031	0.519341	0.999801	9.25743	-0.0088174	0.847397	0.939614
Nr1i3|ENSMUSG00000005677	-1.15622	-0.377766	0.164614	0.874015	-1.15606	0.376818	0.146618	0.424148	-1.15625	0.00337706	0.990041	0.996673	-1.15626	-0.0191312	0.927674	0.999801	-1.15623	0.00794522	0.975126	0.991659
Tomm40l|ENSMUSG00000005674	6.17155	0.0406169	0.396458	0.972965	6.17151	-0.0749633	0.0923689	0.324491	6.17156	-0.0937294	0.065277	0.256144	6.17157	0.057181	0.130768	0.999801	6.17159	-0.0396455	0.405526	0.671101
Apoa2|ENSMUSG00000005681	-1.70412	-0.101634	0.732711	0.991393	-1.70423	-0.401259	0.150036	0.428336	-1.7041	-0.670011	0.0359892	0.173485	-1.70408	0.171803	0.496825	0.999801	-1.70415	-0.505633	0.0830009	0.269568
Fcer1g|ENSMUSG00000058715	3.15625	-0.0549034	0.538084	0.984789	3.15639	0.00023306	0.997746	0.999345	3.15621	-0.0428447	0.648624	0.858087	3.15621	-0.0119556	0.865276	0.999801	3.15633	-0.0598583	0.497215	0.743279
Ndufs2|ENSMUSG00000013593	7.44613	-0.0375916	0.401626	0.97622	7.44604	-0.118532	0.00468964	0.0441177	7.44615	-0.165684	0.000463095	0.0067694	7.44617	0.00590006	0.86777	0.999801	7.44618	-0.160708	0.000299402	0.00384521
Adamts4|ENSMUSG00000006403	5.53902	0.000760595	0.991272	0.999487	5.53906	0.02538	0.702502	0.887993	5.53902	0.0765531	0.307357	0.620655	5.53902	-0.0519558	0.343332	0.999801	5.53917	0.0194284	0.775258	0.906447
B4galt3|ENSMUSG00000052423	5.49313	0.0165557	0.755108	0.991393	5.49317	0.00908652	0.854745	0.95067	5.49314	0.00323661	0.954169	0.985045	5.49315	0.0231577	0.5799	0.999801	5.49323	0.0173149	0.743513	0.889343
Ppox|ENSMUSG00000062729	4.34823	-0.0232064	0.738022	0.991393	4.34827	0.0554206	0.397652	0.702998	4.34821	-0.0798842	0.273667	0.584314	4.34819	0.110261	0.0434908	0.967681	4.34818	0.0331156	0.628254	0.82808
Usp21|ENSMUSG00000053483	5.31406	-0.000557735	0.991938	0.999487	5.31416	-0.0383148	0.457541	0.746203	5.31406	-0.0170904	0.768934	0.91558	5.31406	-0.0230091	0.59442	0.999801	5.3142	-0.0454342	0.404521	0.670607
Ufc1|ENSMUSG00000062963	5.6692	-0.0233179	0.6516	0.991393	5.6691	-0.0807006	0.0933384	0.326295	5.66921	-0.146207	0.00755808	0.0572436	5.66922	0.0370794	0.361844	0.999801	5.66919	-0.107579	0.0354155	0.151842
Dedd|ENSMUSG00000013973	4.72979	-0.0508871	0.421006	0.977718	4.72979	-0.0289049	0.628041	0.84902	4.7298	-0.0969746	0.146799	0.415124	4.72981	0.0146817	0.770175	0.999801	4.72988	-0.0861059	0.168229	0.415986
Nit1|ENSMUSG00000013997	4.99569	-0.00796573	0.893487	0.997217	4.99569	0.0678164	0.220115	0.526603	4.99568	0.0509733	0.419258	0.713658	4.99568	0.00595577	0.899541	0.999801	4.9957	0.0546858	0.351996	0.622042
Pfdn2|ENSMUSG00000006412	5.21445	-0.0205709	0.717287	0.991393	5.21441	-0.10175	0.053479	0.233359	5.21445	-0.135273	0.0243078	0.133261	5.21447	0.00998808	0.822923	0.999801	5.21448	-0.127373	0.0238043	0.113885
Klhdc9|ENSMUSG00000045259	2.01784	-0.0502008	0.680725	0.991393	2.01758	-0.339619	0.00241899	0.026978	2.01785	-0.30297	0.0196841	0.114703	2.01787	-0.0974694	0.316842	0.999801	2.01756	-0.387963	0.00141322	0.013332
Pvrl4|ENSMUSG00000006411	1.60458	-0.173864	0.20428	0.900203	1.60466	0.125646	0.327906	0.641117	1.60453	0.125697	0.382096	0.686315	1.60451	-0.176497	0.103476	0.999801	1.60448	-0.045577	0.736245	0.886107
Arhgap30|ENSMUSG00000048865	2.45813	-0.0371871	0.731018	0.991393	2.4582	0.0488519	0.626332	0.847896	2.45811	-0.127726	0.264461	0.574167	2.4581	0.134243	0.113795	0.999801	2.45815	0.00695335	0.948411	0.980296
Usf1|ENSMUSG00000026641	4.86704	-0.0182956	0.766372	0.991393	4.86703	0.0552999	0.33728	0.650789	4.86703	0.0102801	0.875593	0.958958	4.86703	0.0249041	0.60885	0.999801	4.86699	0.0334611	0.585991	0.802397
Gm26641|ENSMUSG00000097045	-1.25188	-0.338732	0.238555	0.924939	-1.2518	0.407946	0.126449	0.390149	-1.25194	0.320577	0.269761	0.579504	-1.25197	-0.255765	0.227753	0.999801	-1.25206	0.0773116	0.780838	0.908806
F11r|ENSMUSG00000038235	3.17166	-0.0555102	0.538215	0.984789	3.17171	0.224153	0.0074693	0.0613511	3.17163	0.128898	0.172052	0.452292	3.17161	0.0378603	0.587518	0.999801	3.17164	0.160793	0.0709662	0.243008
Alyref2|ENSMUSG00000060244	1.37226	-0.337234	0.0201879	0.509232	1.37211	0.314321	0.0203658	0.123817	1.37226	-0.137655	0.375399	0.679271	1.37226	0.108003	0.35242	0.999801	1.3721	-0.0276928	0.846458	0.938774
Ly9|ENSMUSG00000004707	-0.38166	-0.244842	0.438952	0.977718	-0.381844	-0.0639222	0.82768	0.939675	-0.381676	-0.512026	0.136943	0.397648	-0.381662	0.203559	0.433569	0.999801	-0.38174	-0.340775	0.280863	0.551848
Cd48|ENSMUSG00000015355	0.0499627	-0.246082	0.229755	0.92081	0.0498057	-0.164261	0.39436	0.70173	0.0499759	-0.448876	0.0401762	0.185826	0.0499945	0.0343851	0.834905	0.999801	0.050033	-0.415632	0.0401204	0.165616
Tma7-ps|ENSMUSG00000059058	3.82594	0.0132051	0.865139	0.99628	3.82592	0.0711492	0.327374	0.640612	3.82593	0.096202	0.243551	0.548583	3.82592	-0.0151239	0.805131	0.999801	3.82592	0.0789505	0.30725	0.580474
Cd84|ENSMUSG00000038147	1.75936	-0.226549	0.0894279	0.788832	1.75942	0.00215507	0.985866	0.996425	1.75933	-0.142258	0.306717	0.619801	1.75933	-0.0890627	0.389201	0.999801	1.75938	-0.225274	0.0883142	0.280812
Slamf6|ENSMUSG00000015314	-1.6179	-0.306818	0.390992	0.972161	-1.61783	0.393119	0.233265	0.543967	-1.61793	0.283856	0.438894	0.730509	-1.61793	-0.208121	0.427794	0.999801	-1.61796	0.0609051	0.862268	0.94544
Vangl2|ENSMUSG00000026556	3.01779	0.080407	0.408393	0.97686	3.01783	0.0133216	0.883178	0.959663	3.01776	0.161366	0.121146	0.370917	3.01775	-0.0673087	0.3781	0.999801	3.01778	0.0877386	0.357807	0.627318
Copa|ENSMUSG00000026553	7.66722	0.0613628	0.17024	0.874927	7.66718	0.0187738	0.655041	0.863545	7.66722	0.036167	0.445308	0.735008	7.66722	0.0406942	0.249884	0.999801	7.66721	0.0754558	0.0904725	0.285286
Ncstn|ENSMUSG00000003458	5.81973	0.00900599	0.857944	0.996047	5.81968	-0.0272805	0.562306	0.811951	5.81974	-0.0336574	0.526815	0.787926	5.81975	0.0122865	0.755653	0.999801	5.81976	-0.0232514	0.641721	0.835921
Pex19|ENSMUSG00000003464	6.27876	0.0522514	0.269805	0.938956	6.27873	0.0202677	0.64666	0.858717	6.27876	0.0571893	0.255379	0.563169	6.27876	0.0111344	0.765936	0.999801	6.27875	0.0673058	0.153648	0.394896
Gm10171|ENSMUSG00000089803	-0.275895	-0.28018	0.207985	0.90156	-0.276118	-0.275209	0.190181	0.489078	-0.275888	-0.539978	0.0216845	0.122931	-0.275868	-0.0103859	0.95404	0.999801	-0.275969	-0.567117	0.0103761	0.0618654
Dcaf8|ENSMUSG00000026554	7.15613	0.0252042	0.575297	0.984789	7.15611	-0.0603399	0.15105	0.429459	7.15613	-0.0294889	0.535937	0.793713	7.15614	-0.00941938	0.790166	0.999801	7.15617	-0.0399022	0.372954	0.642799
Pea15a|ENSMUSG00000013698	8.84902	0.0938928	0.0380919	0.614628	8.84907	0.108861	0.0109981	0.080838	8.84899	0.214857	8.01194e-06	0.000249112	8.84897	-0.0134501	0.706333	0.999801	8.84901	0.196965	1.53836e-05	0.000342952
Casq1|ENSMUSG00000007122	0.192471	0.564275	0.00504285	0.285245	0.192109	-0.0276297	0.880105	0.958942	0.192503	0.209567	0.326741	0.638828	0.192492	0.326806	0.042454	0.967681	0.192297	0.536239	0.00682702	0.0449542
Atp1a4|ENSMUSG00000007107	0.952841	0.172849	0.287528	0.943213	0.952985	-0.0872178	0.566416	0.814961	0.952822	-0.125515	0.471745	0.751529	0.952815	0.213575	0.100263	0.999801	0.952943	0.0769139	0.632479	0.830319
Igsf8|ENSMUSG00000038034	6.94297	0.0459122	0.312646	0.952987	6.94297	-0.106275	0.0144538	0.0977341	6.94296	0.0145535	0.762651	0.913244	6.94297	-0.0772188	0.032263	0.909123	6.94299	-0.0672562	0.137889	0.370375
Atp1a2|ENSMUSG00000007097	10.2534	-0.0145514	0.754219	0.991393	10.2536	0.0231753	0.595091	0.831897	10.2534	-0.0276154	0.574872	0.815156	10.2534	0.0357732	0.330782	0.999801	10.2535	0.00378045	0.935207	0.976366
Kcnj9|ENSMUSG00000038026	5.04663	0.137287	0.020149	0.509232	5.04665	-0.0409133	0.456903	0.745787	5.04663	0.132262	0.035274	0.171673	5.04665	-0.040552	0.381815	0.999801	5.04673	0.0921958	0.115541	0.333818
Kcnj10|ENSMUSG00000044708	7.95298	-0.0685704	0.128355	0.847946	7.95312	0.119283	0.00710914	0.059378	7.95293	0.0922355	0.0543827	0.227019	7.95292	-0.044008	0.209048	0.999801	7.95309	0.0462635	0.302129	0.574774
Pigm|ENSMUSG00000050229	4.43756	-0.0231699	0.734306	0.991393	4.43754	0.0747637	0.243166	0.556108	4.43755	0.0675115	0.350738	0.658504	4.43755	-0.0210124	0.69561	0.999801	4.43754	0.0501918	0.459442	0.712552
Slamf9|ENSMUSG00000026548	-0.0288458	0.203836	0.453974	0.977718	-0.0288388	-0.11833	0.63121	0.850286	-0.028859	0.0250274	0.930289	0.978892	-0.0288786	0.0424278	0.836723	0.999801	-0.0289122	0.0861944	0.750627	0.893103
Igsf9|ENSMUSG00000037995	3.05909	-0.172553	0.149809	0.859863	3.05915	-0.136329	0.223438	0.530453	3.05909	-0.203754	0.112582	0.356186	3.05911	-0.113783	0.231439	0.999801	3.05919	-0.31334	0.0114277	0.0666251
Tagln2|ENSMUSG00000026547	2.27058	0.0987069	0.384249	0.971829	2.27062	-0.12211	0.253842	0.567306	2.27057	-0.0504384	0.674065	0.871159	2.27058	0.0265046	0.769486	0.999801	2.27062	-0.0235682	0.83516	0.933994
Ccdc19|ENSMUSG00000026546	0.419799	0.633157	0.0213043	0.521619	0.419799	0.763143	0.00173139	0.0211348	0.419684	1.50626	3.85266e-06	0.00013581	0.419577	-0.108136	0.560077	0.999801	0.419338	1.39804	5.0478e-06	0.0001361
Vsig8|ENSMUSG00000049598	-0.941028	0.0857277	0.763254	0.991393	-0.940993	1.06463	2.33525e-05	0.000712395	-0.941117	0.952632	0.0012149	0.0143246	-0.941177	0.194829	0.33007	0.999801	-0.94144	1.15008	2.67286e-05	0.00054135
Slamf8|ENSMUSG00000053318	-1.81605	-0.202586	0.564493	0.984789	-1.81613	0.135878	0.67507	0.873245	-1.81607	0.283731	0.438184	0.729966	-1.81608	-0.366733	0.177379	0.999801	-1.81615	-0.0713429	0.8371	0.935105
Dusp23|ENSMUSG00000026544	0.932922	0.153399	0.349272	0.969485	0.932899	0.222615	0.149197	0.427086	0.932893	0.45865	0.00917487	0.0659882	0.932874	-0.0826209	0.52157	0.999801	0.932711	0.379571	0.0206855	0.10321
Darc|ENSMUSG00000037872	5.09391	-0.0359292	0.535755	0.984789	5.09406	-0.0121253	0.822559	0.937518	5.0939	-0.0800542	0.192193	0.480609	5.0939	0.0293397	0.522462	0.999801	5.09407	-0.0542434	0.342742	0.613407
Aim2|ENSMUSG00000037860	2.86079	-0.112686	0.244005	0.928029	2.86052	-0.184374	0.042175	0.200819	2.86082	-0.343925	0.000925112	0.0115771	2.86085	0.0410439	0.594346	0.999801	2.86062	-0.295218	0.00216986	0.0184416
Cadm3|ENSMUSG00000005338	8.42994	0.0477217	0.285469	0.943213	8.42988	-0.191146	4.40197e-06	0.000180439	8.42998	-0.201599	2.09561e-05	0.000540693	8.43001	0.0547939	0.122814	0.999801	8.43006	-0.148692	0.000820557	0.008582
Pydc4|ENSMUSG00000073491	-2.49927	0.256152	0.594849	0.987824	-2.49935	-0.796213	0.0819917	0.302198	NA	NA	NA	NA	NA	NA	NA	NA	NA	NA	NA	NA
Pyhin1|ENSMUSG00000043263	-1.86868	0.2633	0.589396	0.987824	-1.86867	0.0644404	0.881442	0.959364	-1.86871	1.39216	0.00978999	0.0691923	-1.86872	-1.07391	0.00509081	0.491035	NA	NA	NA	NA
AI607873|ENSMUSG00000073490	-2.14098	-0.108628	0.773098	0.99203	-2.14104	-0.461132	0.209152	0.513541	NA	NA	NA	NA	NA	NA	NA	NA	NA	NA	NA	NA
Ifi204|ENSMUSG00000073489	-1.42157	-0.184582	0.635061	0.9909	-1.42154	0.0694337	0.846842	0.946677	-1.42158	0.413654	0.312096	0.624848	-1.42159	-0.543299	0.0744001	0.999801	-1.42171	-0.12186	0.752923	0.894217
Ifi203|ENSMUSG00000039997	0.39569	-0.101038	0.620891	0.988056	0.395735	-0.143448	0.45321	0.74378	0.395658	-0.0522292	0.807249	0.931173	0.395656	-0.195277	0.222017	0.999801	0.395797	-0.246254	0.23191	0.497711
Mndal|ENSMUSG00000090272	-0.698121	-0.354212	0.157337	0.870716	-0.698195	-0.205354	0.388056	0.69635	-0.698148	-0.0232248	0.930319	0.978892	-0.698136	-0.542753	0.00568301	0.509269	-0.698275	-0.552876	0.027388	0.126158
Fmn2|ENSMUSG00000028354	6.1876	0.0626883	0.187893	0.893941	6.18757	-0.020315	0.648473	0.859484	6.18761	0.0333144	0.510186	0.777913	6.18761	0.00634637	0.866493	0.999801	6.18761	0.0357854	0.450318	0.706869
Grem2|ENSMUSG00000050069	4.96436	-0.019573	0.776871	0.99203	4.96415	-0.265802	0.000206225	0.00403408	4.96442	-0.220976	0.00553453	0.0453121	4.96445	-0.0709923	0.203005	0.999801	4.96436	-0.29141	0.000197097	0.00274586
Rgs7|ENSMUSG00000026527	5.24102	-0.053356	0.341133	0.968085	5.241	-0.0419622	0.424781	0.72327	5.24102	-0.0346345	0.560071	0.80752	5.24104	-0.0656755	0.139099	0.999801	5.24107	-0.100412	0.0722201	0.24602
Fh1|ENSMUSG00000026526	6.11655	-0.0381117	0.426757	0.977718	6.11648	-0.0190131	0.67135	0.871603	6.11655	-0.0150887	0.767514	0.915232	6.11656	-0.0458076	0.2295	0.999801	6.11656	-0.0628789	0.187533	0.442713
Chml|ENSMUSG00000078185	2.2816	0.0416468	0.715006	0.991393	2.28175	0.00764309	0.942831	0.981986	2.28158	0.124802	0.299591	0.612411	2.28158	-0.0764503	0.384591	0.999801	2.28176	0.0408367	0.71899	0.877644
Opn3|ENSMUSG00000026525	1.89155	-0.0942625	0.450653	0.977718	1.89171	-0.0212801	0.857986	0.951932	1.89154	-0.107464	0.41472	0.709363	1.89154	-0.00685307	0.944938	0.999801	1.89174	-0.118492	0.336246	0.607653
Exo1|ENSMUSG00000039748	-0.933927	0.242002	0.366339	0.970269	-0.934426	-0.0681179	0.775391	0.918068	-0.9339	-0.013698	0.962047	0.987733	-0.933906	0.180049	0.409269	0.999801	-0.934318	0.165175	0.546242	0.775343
B020018G12Rik|ENSMUSG00000078184	2.15494	0.0565059	0.629838	0.990814	2.15487	0.125345	0.256457	0.569865	2.15494	-0.00836026	0.946095	0.983242	2.15493	0.187833	0.0421715	0.967681	2.15489	0.180285	0.118816	0.339299
Pld5|ENSMUSG00000055214	4.73164	-0.0988267	0.22216	0.913094	4.73153	0.0154126	0.831999	0.941715	4.73167	-0.24456	0.00612871	0.0491144	4.73168	0.152312	0.0186062	0.78055	4.73172	-0.0923586	0.244802	0.513601
Cep170|ENSMUSG00000057335	6.52074	0.0348905	0.449276	0.977718	6.5207	-0.0357734	0.410518	0.71195	6.52076	0.011729	0.810538	0.932563	6.52077	-0.015599	0.668656	0.999801	6.52078	-0.00285014	0.950622	0.980636
Sdccag8|ENSMUSG00000026504	4.23357	-0.0230415	0.746708	0.991393	4.23352	0.0376016	0.571111	0.81795	4.23356	-0.00898488	0.905786	0.970446	4.23355	0.020116	0.720497	0.999801	4.2335	0.00955527	0.892876	0.957757
Akt3|ENSMUSG00000019699	7.42684	-0.0347905	0.437288	0.977718	7.42681	-0.0442261	0.290105	0.604386	7.42685	-0.0732204	0.1235	0.374678	7.42686	-0.0108753	0.758838	0.999801	7.42689	-0.0842836	0.0589286	0.215379
Zbtb18|ENSMUSG00000063659	7.34307	-0.207158	0.0190075	0.508495	7.34303	-0.174327	0.0298162	0.159779	7.34311	-0.319626	0.00104119	0.0127048	7.34315	-0.0696724	0.293322	0.999801	7.34331	-0.393035	4.90275e-05	0.000874819
Adss|ENSMUSG00000015961	6.65376	-0.070693	0.123118	0.843119	6.6537	-0.0327855	0.443413	0.737947	6.65377	-0.0836978	0.0866692	0.305329	6.65379	-0.026287	0.469887	0.999801	6.65379	-0.108536	0.0172847	0.0903839
Gm16432|ENSMUSG00000091476	-0.213222	-0.30079	0.17921	0.881596	-0.213271	-0.122813	0.553251	0.806218	-0.213212	-0.445305	0.0595321	0.24134	-0.213189	0.0101011	0.954006	0.999801	-0.213194	-0.424903	0.0531787	0.201337
Desi2|ENSMUSG00000026502	1.929	0.116504	0.357208	0.970269	1.92901	0.046944	0.687025	0.87882	1.929	0.0851771	0.526005	0.787559	1.929	0.0717545	0.465729	0.999801	1.92891	0.157212	0.208618	0.470216
Gm9982|ENSMUSG00000055831	-0.211726	-0.376454	0.131656	0.853098	-0.211734	0.250619	0.290808	0.605042	-0.211708	-0.117979	0.64834	0.858043	-0.211701	-0.00862839	0.964573	0.999801	-0.211545	-0.132698	0.588225	0.803314
B230369F24Rik|ENSMUSG00000086350	2.57203	-0.12645	0.223525	0.914973	2.57188	-0.251442	0.00920279	0.0712291	2.57207	-0.367643	0.000959524	0.0118857	2.5721	-0.0148023	0.859666	0.999801	2.57207	-0.384087	0.000220604	0.00301056
Cox20|ENSMUSG00000026500	4.04895	0.0214273	0.773077	0.99203	4.04887	0.00224021	0.974114	0.993154	4.04895	-0.0804974	0.306563	0.619782	4.04896	0.100944	0.0838551	0.999801	4.04892	0.0194729	0.792332	0.913477
Gm16586|ENSMUSG00000089788	5.68164	-0.0555776	0.383319	0.971829	5.68171	0.136911	0.0246934	0.14062	5.68162	0.0487693	0.467472	0.749494	5.68161	0.0248571	0.609199	0.999801	5.68161	0.0791337	0.212752	0.474376
Hnrnpu|ENSMUSG00000039630	8.97004	-0.0632651	0.162418	0.871901	8.97002	-0.0582716	0.172882	0.4634	8.97005	-0.128759	0.00744445	0.0566585	8.97006	0.00282859	0.937112	0.999801	8.9701	-0.125155	0.00563351	0.0390666
Efcab2|ENSMUSG00000026495	3.68806	0.0126765	0.873167	0.996817	3.68804	-0.00673613	0.927931	0.976589	3.68806	-0.0262925	0.75461	0.909794	3.68806	0.0295467	0.638655	0.999801	3.68806	0.00259277	0.973873	0.990975
Kif26b|ENSMUSG00000026494	3.70573	0.131368	0.170967	0.875125	3.70577	-0.0699685	0.4346	0.73179	3.70574	-0.00760602	0.939357	0.981775	3.70574	0.0678028	0.38173	0.999801	3.70573	0.0620777	0.510123	0.752246
Gm16564|ENSMUSG00000089713	-1.60479	-0.438727	0.242194	0.927662	-1.60471	0.396826	0.264548	0.578746	-1.60482	0.291724	0.440658	0.732166	-1.60482	-0.343193	0.228249	0.999801	-1.60478	-0.0241512	0.946153	0.979971
Smyd3|ENSMUSG00000055067	5.44478	-0.0697869	0.1915	0.896661	5.4448	-0.099244	0.0461764	0.212454	5.44479	-0.0811749	0.151242	0.422343	5.44481	-0.0924696	0.0280905	0.874178	5.44486	-0.172149	0.00113334	0.0111541
Tfb2m|ENSMUSG00000026492	3.32617	-0.0211208	0.80735	0.994794	3.32615	0.035738	0.658067	0.86484	3.32617	0.0681844	0.457419	0.742907	3.32617	-0.062891	0.351715	0.999801	3.3262	0.00872472	0.918968	0.969502
Cnst|ENSMUSG00000038949	6.99578	-0.0583534	0.196205	0.896661	6.99567	-0.233288	5.55433e-07	3.26697e-05	6.99585	-0.31941	1.30363e-08	1.29097e-06	6.9959	0.023494	0.509066	0.999801	6.99598	-0.295527	2.10311e-08	1.43802e-06
Sccpdh|ENSMUSG00000038936	6.06573	0.0514331	0.290569	0.943213	6.06572	0.26506	8.57228e-07	4.61533e-05	6.0657	0.286256	1.57087e-06	6.62859e-05	6.06568	0.0260229	0.493381	0.999801	6.06569	0.31289	8.70662e-08	4.801e-06
Ahctf1|ENSMUSG00000026491	6.75982	0.0328448	0.469206	0.978767	6.75974	-0.0540837	0.204066	0.507646	6.75985	-0.0324519	0.502454	0.773381	6.75987	0.00788177	0.82728	0.999801	6.75984	-0.0259823	0.565132	0.78841
Cdc42bpa|ENSMUSG00000026490	8.13662	0.0283194	0.526291	0.984789	8.13665	0.0162979	0.697295	0.885092	8.13661	0.018409	0.698072	0.883011	8.13662	0.0229803	0.514388	0.999801	8.13663	0.0403115	0.367545	0.637072
Adck3|ENSMUSG00000026489	5.36202	0.058781	0.280885	0.943213	5.36193	-0.0814298	0.108309	0.358131	5.36203	-0.0637042	0.269858	0.57964	5.36204	0.0361155	0.40144	0.999801	5.36197	-0.0256384	0.63499	0.831416
Psen2|ENSMUSG00000010609	3.31877	0.132553	0.126054	0.846649	3.31874	0.0678376	0.40215	0.705897	3.31874	0.176324	0.0552801	0.229479	3.31873	0.0213394	0.753357	0.999801	3.31869	0.198829	0.02121	0.105
Itpkb|ENSMUSG00000038855	4.5896	-0.00620619	0.928146	0.997501	4.58965	-0.0454355	0.476685	0.759327	4.58958	-0.0698225	0.341513	0.650595	4.58957	0.0201976	0.712145	0.999801	4.58972	-0.0534243	0.432585	0.691731
Gm5069|ENSMUSG00000055676	0.401422	-0.0421731	0.823619	0.994968	0.401326	0.188497	0.29036	0.604403	0.401441	-0.201652	0.320079	0.631964	0.401441	0.348249	0.0264984	0.859154	0.401444	0.141486	0.448571	0.705287
6330403A02Rik|ENSMUSG00000053963	7.65031	0.116799	0.0169209	0.499151	7.65022	-0.161696	0.00086306	0.012425	7.65034	-0.08551	0.0893132	0.310935	7.65036	0.0370659	0.323661	0.999801	7.65028	-0.0462757	0.316021	0.588268
Parp1|ENSMUSG00000026496	6.09153	-0.00690833	0.885511	0.996861	6.09146	-0.116362	0.00974652	0.0742334	6.09156	-0.162294	0.00149836	0.0169436	6.09159	0.0364096	0.3423	0.999801	6.09162	-0.12846	0.0071172	0.0465422
Lin9|ENSMUSG00000058729	1.91205	0.126329	0.314265	0.952987	1.91173	-0.128709	0.266724	0.581313	1.91208	0.0164833	0.901313	0.969018	1.91209	-0.0249463	0.803905	0.999801	1.91183	-0.00781562	0.949919	0.980585
Acbd3|ENSMUSG00000026499	5.27987	0.0950405	0.0862985	0.784054	5.27982	-0.0352701	0.493806	0.771904	5.27989	0.0484958	0.411289	0.706739	5.27989	0.00935952	0.831223	0.999801	5.27991	0.0552762	0.314594	0.587367
H3f3a|ENSMUSG00000060743	5.90305	-0.0476632	0.337957	0.967444	5.90293	0.0170211	0.713233	0.893036	5.90305	0.0295907	0.574466	0.815036	5.90305	-0.0673772	0.0842405	0.999801	5.90297	-0.0354455	0.4717	0.722772
Gm16067|ENSMUSG00000073485	0.65956	-0.320098	0.073021	0.743362	0.659369	0.143627	0.390813	0.698679	0.659547	-0.115983	0.540134	0.795869	0.659534	-0.076977	0.585681	0.999801	0.659254	-0.174614	0.321691	0.593267
Sde2|ENSMUSG00000038806	4.84056	-0.0406896	0.509801	0.984789	4.84057	0.00585186	0.919005	0.973415	4.84058	0.0211891	0.747301	0.90607	4.84059	-0.0608929	0.213699	0.999801	4.84067	-0.0409299	0.505597	0.74988
Pycr2|ENSMUSG00000026520	4.31571	-0.0145958	0.834964	0.994968	4.31568	0.0339217	0.602504	0.834988	4.3157	0.0512554	0.491867	0.765642	4.3157	-0.0343658	0.537055	0.999801	4.31567	0.0156828	0.821596	0.927204
Lefty1|ENSMUSG00000038793	-1.8224	-0.359705	0.393345	0.972161	-1.8226	-0.0764341	0.842643	0.944797	-1.82239	-0.335699	0.452283	0.738917	-1.82237	-0.102607	0.75584	0.999801	NA	NA	NA	NA
Tmem63a|ENSMUSG00000026519	5.97115	-0.0516357	0.457168	0.978545	5.97118	0.0506258	0.443491	0.737949	5.97113	0.0817357	0.265441	0.575419	5.97112	-0.0860627	0.115659	0.999801	5.97123	-0.00627002	0.926506	0.972497
Ephx1|ENSMUSG00000038776	5.13785	-0.0906691	0.339536	0.967444	5.13789	0.129791	0.141885	0.416051	5.13782	0.0299049	0.761996	0.913075	5.13784	0.00473682	0.94844	0.999801	5.13791	0.0290003	0.755345	0.895042
Nvl|ENSMUSG00000026516	5.44736	0.0506303	0.343677	0.968869	5.44733	-0.160748	0.00117729	0.015834	5.44737	-0.142853	0.0119047	0.0800754	5.44739	0.0287804	0.495039	0.999801	5.44741	-0.113794	0.0313956	0.139469
Cnih4|ENSMUSG00000062169	3.50428	0.0764629	0.357693	0.970269	3.50417	0.0331556	0.667029	0.869265	3.50428	0.141847	0.107119	0.345482	3.50429	-0.0348457	0.595201	0.999801	3.50425	0.104057	0.206332	0.466672
Wdr26|ENSMUSG00000038733	7.47298	-0.00469298	0.916482	0.997217	7.47296	-0.00783048	0.85251	0.949677	7.47299	-0.012207	0.796672	0.926995	7.473	-0.00369652	0.916752	0.999801	7.47303	-0.0164037	0.712065	0.874218
A430110L20Rik|ENSMUSG00000054135	1.22376	-0.271335	0.0717529	0.739047	1.22374	0.129406	0.366044	0.677302	1.22371	-0.123744	0.438393	0.730165	1.22371	-0.0194253	0.871438	0.999801	1.22354	-0.143915	0.332503	0.604694
Rpl35a-ps2|ENSMUSG00000081214	1.15476	0.0113059	0.952248	0.999369	1.15473	-0.0372473	0.825851	0.938777	1.15476	-0.111567	0.585374	0.820878	1.15475	0.0864703	0.565412	0.999801	1.15472	-0.0315399	0.86755	0.947654
Cnih3|ENSMUSG00000026514	2.00042	0.138187	0.378049	0.971278	2.00046	0.107278	0.464159	0.750135	2.00041	0.273456	0.106793	0.344846	2.00041	-0.0316196	0.797582	0.999801	2.00034	0.251287	0.112858	0.328901
Lbr|ENSMUSG00000004880	3.78753	0.112425	0.149825	0.859863	3.78757	0.0773996	0.292624	0.607202	3.78753	0.209707	0.0108356	0.0746724	3.78753	-0.021369	0.729069	0.999801	3.78759	0.189208	0.0149935	0.081598
Enah|ENSMUSG00000022995	6.21661	0.122794	0.0107081	0.399839	6.21662	0.0153326	0.729716	0.89961	6.21661	0.103879	0.0387405	0.181637	6.2166	0.0342076	0.366452	0.999801	6.21657	0.133173	0.00515138	0.0365536
Srp9|ENSMUSG00000026511	5.32348	-0.0125085	0.821143	0.994968	5.32336	0.02799	0.586487	0.827717	5.32348	0.0315092	0.590223	0.823294	5.32349	-0.0226397	0.601286	0.999801	5.32339	0.0132098	0.809941	0.922167
Degs1|ENSMUSG00000038633	6.74301	0.00844952	0.853904	0.996047	6.74294	0.107591	0.0123001	0.0873677	6.74301	0.109398	0.0242507	0.133076	6.74301	0.00176343	0.960845	0.999801	6.74298	0.110915	0.0155897	0.083886
Fbxo28|ENSMUSG00000047539	5.63507	0.0472244	0.358023	0.970269	5.63503	-0.05001	0.301486	0.615992	5.63508	0.0178261	0.743865	0.904138	5.63509	-0.0227009	0.578235	0.999801	5.63513	-0.00391186	0.938854	0.97751
Trp53bp2|ENSMUSG00000026510	5.37649	-0.0244862	0.69232	0.991393	5.3765	0.0745775	0.202258	0.505497	5.37646	0.0779189	0.233802	0.536352	5.37646	-0.0329042	0.501138	0.999801	5.37643	0.0511326	0.409321	0.673773
Capn2|ENSMUSG00000026509	6.50491	0.0752558	0.103216	0.813717	6.50495	-0.0247213	0.569417	0.816765	6.5049	-0.00169183	0.972411	0.99085	6.5049	0.0535167	0.144177	0.999801	6.50494	0.0432022	0.349276	0.619542
Susd4|ENSMUSG00000038576	6.41348	0.0709284	0.136923	0.854025	6.41347	-0.126699	0.00737715	0.0608854	6.41348	0.0262014	0.600545	0.830196	6.4135	-0.0818554	0.0338224	0.921821	6.41353	-0.0605913	0.202949	0.462625
Tlr5|ENSMUSG00000079164	-0.776443	-0.274669	0.267858	0.938867	-0.776551	-0.188579	0.427698	0.725213	-0.776445	-0.301896	0.242344	0.546798	-0.776448	-0.157977	0.426947	0.999801	-0.776529	-0.464122	0.0592384	0.216141
Disp1|ENSMUSG00000030768	2.82227	-0.0146224	0.88177	0.996828	2.82229	0.0591782	0.519815	0.788468	2.82224	0.0508524	0.625595	0.845141	2.82224	-0.00691103	0.928409	0.999801	2.82219	0.0413054	0.674296	0.855834
Brox|ENSMUSG00000046836	5.84145	0.0257276	0.605612	0.987824	5.84139	-0.0136505	0.770217	0.915339	5.84145	0.0425237	0.421399	0.715261	5.84145	-0.0339273	0.391503	0.999801	5.84144	0.00884263	0.858014	0.943203
Aida|ENSMUSG00000042901	5.02173	0.10124	0.0878893	0.786187	5.02176	0.156736	0.00470732	0.0441342	5.02171	0.258893	4.10415e-05	0.000961865	5.0217	-0.00321014	0.945044	0.999801	5.02171	0.252498	1.92489e-05	0.000415064
Mia3|ENSMUSG00000056050	6.95037	0.0206032	0.647937	0.991393	6.95037	0.0859211	0.0435863	0.205142	6.95036	0.107872	0.0240869	0.132474	6.95036	-0.00382143	0.914743	0.999801	6.95038	0.102175	0.0233216	0.112172
Taf1a|ENSMUSG00000072258	3.06507	0.0754011	0.40907	0.97686	3.06507	-0.035392	0.678766	0.874706	3.06509	0.00305798	0.974696	0.991832	3.06509	0.0335222	0.645438	0.999801	3.06518	0.0360482	0.687794	0.862847
Hhipl2|ENSMUSG00000053461	-0.791922	-0.0632796	0.804796	0.994794	-0.7917	0.43389	0.0726299	0.281419	-0.79201	0.657324	0.0167018	0.102264	-0.792047	-0.282355	0.15293	0.999801	-0.792079	0.371301	0.133209	0.363228
Dusp10|ENSMUSG00000039384	2.4083	0.00333876	0.975972	0.999487	2.40823	0.099213	0.338196	0.651617	2.40826	0.141065	0.227283	0.528327	2.40825	-0.0427516	0.613033	0.999801	2.40816	0.0970983	0.374895	0.644649
Hlx|ENSMUSG00000039377	-1.11585	-0.0382077	0.910789	0.997217	-1.11585	-0.0999966	0.756091	0.910649	-1.1159	0.13352	0.708065	0.888817	-1.1159	-0.295071	0.273979	0.999801	-1.11594	-0.152182	0.645601	0.838212
Marc2|ENSMUSG00000073481	5.11913	-0.0415067	0.475441	0.978767	5.11913	0.125365	0.0208576	0.125936	5.1191	0.0815064	0.187112	0.473572	5.1191	-0.00206666	0.963918	0.999801	5.11905	0.0798145	0.167499	0.415097
C130074G19Rik|ENSMUSG00000039349	3.95459	-0.0105818	0.909798	0.997217	3.95466	0.0495074	0.56795	0.816279	3.95457	-0.039946	0.688374	0.878584	3.95456	0.0732634	0.321165	0.999801	3.95467	0.0354993	0.698912	0.868725
Mark1|ENSMUSG00000026620	7.12822	0.00258009	0.954102	0.999369	7.12828	0.0889114	0.035094	0.178167	7.1282	0.105858	0.0258036	0.138942	7.1282	-0.015313	0.665977	0.999801	7.12824	0.0832721	0.0619542	0.222508
Rab3gap2|ENSMUSG00000039318	6.81751	0.0207487	0.647029	0.991393	6.81748	-0.0216267	0.612627	0.840667	6.81752	-0.00162323	0.973007	0.991056	6.81753	-0.000823136	0.98174	0.999801	6.81756	-0.00840629	0.851733	0.941024
Iars2|ENSMUSG00000026618	5.79398	0.00598417	0.905485	0.997217	5.79392	-0.0797187	0.0907033	0.321467	5.79399	-0.0663756	0.213909	0.510544	5.794	-0.0114122	0.773744	0.999801	5.79396	-0.0763354	0.128892	0.357178
Bpnt1|ENSMUSG00000026617	5.14914	0.10722	0.061038	0.711687	5.14908	-0.022949	0.667209	0.869265	5.14915	0.103651	0.0893786	0.3111	5.14915	-0.0211343	0.643117	0.999801	5.14913	0.079715	0.161943	0.407153
Eprs|ENSMUSG00000026615	6.95147	-0.0147479	0.745131	0.991393	6.9514	0.00442095	0.917127	0.972826	6.95148	-0.018442	0.701026	0.885376	6.95149	0.00300717	0.932825	0.999801	6.95148	-0.014605	0.746863	0.890731
Slc30a10|ENSMUSG00000026614	5.55886	-0.0340774	0.515294	0.984789	5.55881	0.15619	0.00136729	0.0177098	5.55885	0.0675737	0.227241	0.528324	5.55883	0.0497251	0.230177	0.999801	5.55875	0.118521	0.0236305	0.113148
Gm2061|ENSMUSG00000097615	2.90249	0.0228167	0.813426	0.994968	2.90251	0.136502	0.127667	0.392181	2.90247	0.0610096	0.551964	0.802286	2.90245	0.0936337	0.213463	0.999801	2.90239	0.161854	0.0956384	0.295953
Lyplal1|ENSMUSG00000039246	1.85769	-0.0200886	0.874364	0.996817	1.85764	0.0468817	0.69145	0.881518	1.85769	0.166974	0.215484	0.512733	1.85769	-0.143573	0.155338	0.999801	1.85767	0.0218819	0.862309	0.94544
Tgfb2|ENSMUSG00000039239	3.16965	-0.0602916	0.52931	0.984789	3.16955	0.174007	0.0580169	0.244706	3.16963	-0.0105737	0.916291	0.973633	3.1696	0.116135	0.120149	0.999801	3.16948	0.10832	0.2559	0.526572
Rrp15|ENSMUSG00000001305	3.30577	0.0418193	0.627842	0.98988	3.30565	0.0764048	0.345744	0.658551	3.30576	0.072598	0.426186	0.719989	3.30575	0.0438512	0.52341	0.999801	3.30559	0.11771	0.170735	0.419814
A430105J06Rik|ENSMUSG00000097784	-1.40904	0.199883	0.589307	0.987824	-1.40915	0.0209128	0.947387	0.983556	-1.40906	0.254801	0.51479	0.78103	-1.40907	-0.0420215	0.87493	0.999801	-1.40911	0.204303	0.577297	0.796603
Spata17|ENSMUSG00000026611	-0.872733	-0.00449285	0.986275	0.999487	-0.872963	-0.137438	0.565756	0.81447	-0.872701	-0.177902	0.516914	0.782035	-0.87269	0.0372359	0.858183	0.999801	-0.872793	-0.150065	0.551916	0.778618
Gpatch2|ENSMUSG00000039210	4.46303	0.0734226	0.275988	0.941762	4.4631	0.0861678	0.17384	0.465063	4.46302	0.14672	0.0399286	0.18493	4.46301	0.0134401	0.801302	0.999801	4.46307	0.155152	0.0207449	0.103446
Esrrg|ENSMUSG00000026610	4.94889	-0.139099	0.14842	0.857641	4.94893	-0.0474877	0.596623	0.832053	4.94889	-0.0819739	0.420637	0.714697	4.9489	-0.10203	0.194006	0.999801	4.94906	-0.183877	0.0576551	0.212633
Kctd3|ENSMUSG00000026608	6.25424	-0.0202183	0.671087	0.991393	6.25423	0.052006	0.245255	0.558382	6.25422	0.0486398	0.333442	0.644028	6.25423	-0.0202679	0.587946	0.999801	6.25427	0.0290799	0.538782	0.770383
Kcnk2|ENSMUSG00000037624	7.45826	-0.141351	0.0248609	0.544738	7.45833	-0.0170469	0.757805	0.910977	7.45826	-0.202414	0.00366021	0.0335689	7.45828	0.038261	0.420461	0.999801	7.45836	-0.162678	0.0100761	0.0606461
Cenpf|ENSMUSG00000026605	0.598432	0.0306937	0.889182	0.997217	0.597889	-0.113209	0.582278	0.825628	0.598503	0.116152	0.624454	0.844635	0.598496	-0.214043	0.252876	0.999801	0.598265	-0.0763746	0.72328	0.879419
Ptpn14|ENSMUSG00000026604	2.68481	0.0461596	0.651851	0.991393	2.68487	-0.0801465	0.398366	0.703657	2.68479	-0.0633343	0.557879	0.806308	2.6848	0.0264953	0.742749	0.999801	2.68483	-0.0383608	0.705379	0.87144
Smyd2|ENSMUSG00000026603	3.76259	0.090987	0.246304	0.929326	3.76256	0.00979869	0.894435	0.964237	3.76259	0.0419733	0.611871	0.836563	3.76259	0.0594981	0.335545	0.999801	3.76264	0.0991416	0.201558	0.461146
Prox1|ENSMUSG00000010175	4.91171	-0.0212936	0.77875	0.99217	4.9116	0.011415	0.874502	0.957289	4.91172	0.0445328	0.580499	0.818191	4.91171	-0.0594094	0.321364	0.999801	4.91172	-0.0127748	0.863628	0.945865
Gm17566|ENSMUSG00000079045	0.530205	0.10368	0.642677	0.990949	0.530048	0.176826	0.386887	0.694966	0.530214	0.193633	0.411089	0.706739	0.530196	0.0762058	0.654338	0.999801	0.53009	0.278736	0.211402	0.473487
Rps6kc1|ENSMUSG00000089872	5.5638	0.0090721	0.862713	0.996047	5.5638	0.0442839	0.366616	0.67764	5.56379	0.0326242	0.558657	0.806596	5.5638	0.0208949	0.613027	0.999801	5.56384	0.0424545	0.41532	0.67743
Angel2|ENSMUSG00000026634	6.47712	-0.0821567	0.0783789	0.758644	6.47706	-0.0548364	0.20905	0.513506	6.47713	-0.0941005	0.0562147	0.232009	6.47714	-0.0487653	0.182352	0.999801	6.47714	-0.142672	0.00199347	0.0173505
Vash2|ENSMUSG00000037568	0.54173	-0.352576	0.0607946	0.711234	0.541602	0.231597	0.172918	0.4634	0.541744	-0.186066	0.346828	0.655812	0.541749	0.0500995	0.730154	0.999801	0.541668	-0.125889	0.489938	0.7374
Mfsd7b|ENSMUSG00000066595	3.78823	0.12328	0.122707	0.843119	3.78827	0.143906	0.0572935	0.243095	3.78823	0.185162	0.0313774	0.158311	3.78822	0.0799588	0.197268	0.999801	3.78825	0.265986	0.00179674	0.016005
Tatdn3|ENSMUSG00000026632	4.10329	0.320867	0.0273244	0.559727	4.10335	-0.0519731	0.69692	0.885026	4.10325	0.284254	0.0560975	0.231655	4.10322	-0.0146133	0.895	0.999801	4.10332	0.269008	0.0577024	0.212716
Nsl1|ENSMUSG00000062510	0.0245817	0.242064	0.246956	0.929624	0.0245388	0.00282857	0.98833	0.996682	0.0245821	0.208835	0.349349	0.657151	0.0245592	0.0297943	0.857389	0.999801	0.0244673	0.248232	0.233892	0.500645
Batf3|ENSMUSG00000026630	-1.28891	0.350893	0.284944	0.943213	-1.28892	0.29468	0.298305	0.61314	-1.28894	0.623512	0.0721401	0.273793	-1.28896	0.0059182	0.979409	0.999801	-1.28898	0.634406	0.0554874	0.207278
Atf3|ENSMUSG00000026628	0.150298	-0.136002	0.64441	0.990949	0.150387	0.427727	0.128813	0.394527	0.150299	0.587261	0.0691488	0.266193	0.150305	-0.310585	0.183551	0.999801	0.150393	0.295165	0.316823	0.589248
D730003I15Rik|ENSMUSG00000073478	1.09835	0.186469	0.236324	0.924143	1.09818	-0.046038	0.756197	0.91067	1.09834	0.0130756	0.936722	0.981404	1.09833	0.129611	0.29144	0.999801	1.09818	0.138986	0.371814	0.641545
Nenf|ENSMUSG00000037499	4.66246	0.048901	0.449394	0.977718	4.66241	-0.0436766	0.467338	0.753028	4.66247	-0.0758444	0.271851	0.582023	4.66248	0.0791256	0.121432	0.999801	4.66244	0.00206916	0.974435	0.991313
Tmem206|ENSMUSG00000026627	3.11342	0.0176715	0.845151	0.994968	3.11341	0.115435	0.174754	0.466529	3.1134	0.144682	0.130115	0.386028	3.11339	-0.0136031	0.848779	0.999801	3.11335	0.126422	0.157531	0.400952
Ppp2r5a|ENSMUSG00000026626	6.35978	-0.030046	0.523224	0.984789	6.35981	0.0265215	0.54744	0.802635	6.35977	0.0264219	0.596278	0.827428	6.35977	-0.0327128	0.37696	0.999801	6.35984	-0.0116221	0.804168	0.919619
Dtl|ENSMUSG00000037474	0.640445	0.0568545	0.858545	0.996047	0.640048	0.285017	0.32985	0.642826	0.640468	0.564545	0.105483	0.342649	0.640435	-0.244797	0.335628	0.999801	0.640123	0.330596	0.305238	0.57846
Ints7|ENSMUSG00000037461	5.2988	0.156051	0.0662054	0.729407	5.29881	-0.311769	0.000379572	0.00649964	5.29881	-0.078658	0.366996	0.671361	5.29883	-0.0780367	0.244297	0.999801	5.29903	-0.159586	0.0575764	0.212619
Lpgat1|ENSMUSG00000026623	6.52049	-0.0194958	0.67224	0.991393	6.52043	-0.143383	0.000832199	0.0120469	6.52053	-0.170809	0.000497457	0.007198	6.52056	0.00516258	0.888083	0.999801	6.52062	-0.169678	0.000222428	0.00302779
Nek2|ENSMUSG00000026622	2.45262	-0.142522	0.369716	0.970269	2.45268	0.377904	0.0130544	0.0911791	2.45252	0.471177	0.00812261	0.0600072	2.4525	-0.244184	0.0471177	0.976258	2.45233	0.224965	0.156992	0.400004
1700034H15Rik|ENSMUSG00000055833	1.93496	-0.367446	0.00862689	0.35628	1.93491	-0.00570205	0.962705	0.989495	1.93498	-0.410092	0.00612053	0.0490903	1.93502	0.0278174	0.789546	0.999801	1.93497	-0.380711	0.00607447	0.0412284
Slc30a1|ENSMUSG00000037434	2.48578	-0.0918677	0.404841	0.97653	2.48567	-0.164478	0.11203	0.365384	2.4858	-0.155124	0.192782	0.481246	2.48582	-0.111248	0.213497	0.999801	2.48573	-0.264744	0.0206352	0.103049
Gm26670|ENSMUSG00000097416	-0.652176	-0.780631	0.0665102	0.729407	-0.652451	0.370534	0.310829	0.62548	-0.652168	-0.571307	0.209516	0.504912	-0.652156	0.152313	0.646457	0.999801	-0.652635	-0.407756	0.332014	0.604339
Traf5|ENSMUSG00000026637	0.390651	0.138854	0.467337	0.978767	0.390794	-0.322729	0.085447	0.31033	0.390617	0.0202688	0.919472	0.974717	0.390617	-0.20516	0.175728	0.999801	0.390851	-0.187788	0.323327	0.595256
Gm10516|ENSMUSG00000097316	2.10489	0.360804	0.0315043	0.57997	2.10497	-0.182502	0.241747	0.554206	2.10487	0.243164	0.153113	0.425626	2.10484	-0.0635864	0.620317	0.999801	2.10498	0.179178	0.269826	0.541298
Rcor3|ENSMUSG00000037395	4.14994	0.0567522	0.453987	0.977718	4.14986	0.119061	0.100053	0.339743	4.14991	0.161565	0.0505671	0.216417	4.1499	0.00812897	0.890673	0.999801	4.14975	0.172853	0.0263034	0.122433
Kcnh1|ENSMUSG00000058248	4.44762	0.0594221	0.505467	0.983494	4.44741	-0.189091	0.0303803	0.161784	4.4477	-0.164786	0.0906926	0.313569	4.44774	0.0288955	0.6911	0.999801	4.44758	-0.135219	0.138179	0.370981
Hhat|ENSMUSG00000037375	-0.270123	0.259651	0.261069	0.936604	-0.270167	-0.202961	0.31815	0.632141	-0.270139	0.234385	0.347959	0.656486	-0.270142	-0.185839	0.297141	0.999801	-0.270335	0.060205	0.795928	0.915339
Gm15867|ENSMUSG00000089812	-0.487637	-0.125776	0.599496	0.987824	-0.487765	0.0344242	0.875464	0.957289	-0.487628	-0.115171	0.645106	0.856273	-0.487622	0.0214508	0.909529	0.999801	-0.487801	-0.100216	0.665926	0.851394
Sertad4|ENSMUSG00000016262	5.90188	0.0102182	0.842746	0.994968	5.90179	-0.0852897	0.0835701	0.305907	5.90191	-0.135992	0.019262	0.113013	5.90193	0.0551134	0.188102	0.999801	5.90188	-0.0799119	0.128782	0.357081
Syt14|ENSMUSG00000016200	3.02902	0.0601143	0.516896	0.984789	3.02895	-0.213913	0.0139383	0.0949958	3.02907	-0.200376	0.0439629	0.197424	3.02911	0.0414248	0.577329	0.999801	3.02908	-0.160199	0.0818221	0.267176
Diexf|ENSMUSG00000016181	4.31374	-0.00865689	0.900816	0.997217	4.31369	-0.180404	0.00565959	0.0503645	4.31377	-0.229107	0.00192167	0.020525	4.3138	0.038585	0.489312	0.999801	4.31385	-0.192694	0.00528348	0.0372129
Irf6|ENSMUSG00000026638	0.709243	-0.220561	0.246897	0.929608	0.709445	0.0458864	0.798333	0.927824	0.70919	-0.0674597	0.732734	0.899432	0.709187	-0.106579	0.485849	0.999801	0.709297	-0.173039	0.355134	0.625068
A130010J15Rik|ENSMUSG00000079144	2.81593	-0.166301	0.0876135	0.786187	2.81577	-0.058932	0.515306	0.785885	2.81594	-0.248635	0.0161757	0.100155	2.81596	0.0158288	0.839717	0.999801	2.81582	-0.225563	0.0185587	0.0952108
Traf3ip3|ENSMUSG00000037318	0.163715	-0.539259	0.00695619	0.318776	0.163648	0.182501	0.336049	0.649083	0.163688	-0.289577	0.168217	0.446905	0.163697	-0.0710272	0.654234	0.999801	0.163629	-0.356385	0.0682605	0.236971
Hsd11b1|ENSMUSG00000016194	2.82068	-0.0515649	0.698433	0.991393	2.82076	-0.111146	0.378415	0.687246	2.82066	-0.318084	0.0293155	0.151366	2.82067	0.151102	0.163393	0.999801	2.82081	-0.161867	0.217425	0.479941
G0s2|ENSMUSG00000009633	1.18124	-0.012506	0.935459	0.997501	1.18111	0.160786	0.261743	0.575378	1.18122	0.0680855	0.673787	0.871063	1.18121	0.0788934	0.511171	0.999801	1.1812	0.138386	0.363983	0.63357
Lamb3|ENSMUSG00000026639	1.59494	0.314645	0.046383	0.654825	1.59503	-0.214191	0.136288	0.406888	1.5949	0.445329	0.0092265	0.066276	1.59491	-0.34787	0.00664791	0.53528	1.59487	0.0877298	0.566304	0.789466
Camk1g|ENSMUSG00000016179	5.05505	-0.0294847	0.782191	0.992394	5.05515	0.00019292	0.998477	0.999364	5.05504	-0.0437989	0.702298	0.885992	5.05506	0.0177039	0.836046	0.999801	5.05519	-0.0402831	0.705027	0.871319
Plxna2|ENSMUSG00000026640	6.87465	0.00417825	0.941276	0.997744	6.87456	-0.204163	0.000551403	0.00873265	6.87469	-0.154765	0.0163208	0.100687	6.87472	-0.0483151	0.294989	0.999801	6.87472	-0.208469	0.000854249	0.00885539
Cd34|ENSMUSG00000016494	4.59503	0.0465072	0.479729	0.978767	4.59508	-0.0156457	0.798561	0.927838	4.59501	0.0764654	0.273075	0.583613	4.59501	-0.0495644	0.336574	0.999801	4.59511	0.0246471	0.705099	0.871319
Gm16897|ENSMUSG00000097325	-1.35889	0.640238	0.0984228	0.808427	-1.35893	-0.766003	0.0339693	0.17426	-1.35888	0.0489518	0.905093	0.970408	-1.35886	-0.16476	0.577654	0.999801	-1.35883	-0.144711	0.705635	0.871524
A330023F24Rik|ENSMUSG00000096929	6.46811	-0.0614387	0.440252	0.977718	6.46813	0.0482351	0.519654	0.788296	6.46813	-0.157086	0.0660951	0.25829	6.46814	0.143374	0.0279147	0.871875	6.46822	-0.0174338	0.82224	0.927245
Cd46|ENSMUSG00000016493	2.15015	-0.0951412	0.415178	0.977718	2.15014	0.0208632	0.850125	0.948418	2.15014	-0.00726985	0.952829	0.984461	2.15014	-0.0732054	0.425509	0.999801	2.15008	-0.0668376	0.561977	0.786059
Cr1l|ENSMUSG00000016481	3.80274	-0.0359883	0.644788	0.990949	3.80266	-0.0164546	0.820202	0.93695	3.80276	-0.0735959	0.373818	0.678374	3.80277	0.017394	0.778001	0.999801	3.80279	-0.0578698	0.453266	0.709327
Cr2|ENSMUSG00000026616	-1.16741	0.261808	0.498291	0.982515	-1.16732	0.4197	0.238993	0.551093	-1.16743	0.464083	0.26098	0.569979	-1.16743	0.222907	0.435185	0.999801	-1.16733	0.666282	0.0924276	0.289451
Ppp1r14c|ENSMUSG00000040653	2.88981	-0.227198	0.0191712	0.509232	2.8899	0.162047	0.0715695	0.279111	2.88979	-0.0339863	0.740647	0.902665	2.8898	-0.0367144	0.626076	0.999801	2.88987	-0.0738274	0.445596	0.702485
Plekhg1|ENSMUSG00000040624	4.85485	-0.0647392	0.363757	0.970269	4.85493	0.0206599	0.756035	0.910647	4.85483	-0.0200573	0.78834	0.923787	4.85483	-0.0277979	0.615004	0.999801	4.85491	-0.0447404	0.519818	0.758449
Mthfd1l|ENSMUSG00000040675	3.1486	0.0877082	0.43151	0.977718	3.14844	-0.103249	0.327351	0.640612	3.1486	0.0973853	0.405756	0.702793	3.14863	-0.116519	0.186958	0.999801	3.14856	-0.0278217	0.800888	0.918349
Akap12|ENSMUSG00000038587	4.48522	0.072307	0.431647	0.977718	4.48545	0.214126	0.0202099	0.123262	4.48517	0.309698	0.00302676	0.0288822	4.48514	-0.0236482	0.750767	0.999801	4.48532	0.291526	0.00319772	0.0249483
Zbtb2|ENSMUSG00000075327	3.7274	-0.10797	0.174742	0.878634	3.72765	0.381957	4.30364e-07	2.63917e-05	3.72736	0.291535	0.000531157	0.00756424	3.72734	-0.0199484	0.747463	0.999801	3.72755	0.269509	0.000655106	0.00715552
Gm21781|ENSMUSG00000095123	4.90512	-0.00488542	0.936078	0.997501	4.90508	-0.118074	0.0383949	0.188302	4.90509	-0.107122	0.0964348	0.326131	4.90508	-0.0197514	0.681798	0.999801	4.90501	-0.125613	0.0368916	0.156366
Rmnd1|ENSMUSG00000019763	3.89083	0.0146718	0.846873	0.995375	3.89072	-0.140813	0.0469611	0.214713	3.89086	-0.245907	0.0021951	0.0225323	3.89089	0.116925	0.055096	0.996196	3.89094	-0.133137	0.0725243	0.246712
1700052N19Rik|ENSMUSG00000061759	4.14631	-0.0893007	0.216751	0.910553	4.14606	-0.214543	0.00137944	0.0178134	4.14636	-0.262108	0.00067355	0.00905486	4.1464	-0.0477163	0.408804	0.999801	4.14631	-0.311605	1.4059e-05	0.000319581
Syne1|ENSMUSG00000019769	8.14965	0.00543449	0.90366	0.997217	8.14974	-0.0706583	0.0919719	0.323833	8.14964	-0.0858582	0.0701911	0.268899	8.14965	0.0165049	0.639355	0.999801	8.14977	-0.0701244	0.115831	0.334179
Syne1|ENSMUSG00000096054	7.72993	0.0521029	0.314557	0.952987	7.72985	-0.164101	0.00172981	0.0211305	7.72999	-0.204706	0.000709573	0.00938718	7.73002	0.0903523	0.035307	0.933233	7.73009	-0.119429	0.0261308	0.121943
Myct1|ENSMUSG00000046916	-0.237685	-0.340701	0.157985	0.87118	-0.237572	0.452927	0.04745	0.216111	-0.23774	0.0377726	0.877767	0.959112	-0.237755	0.0653928	0.714201	0.999801	-0.237801	0.0893888	0.69806	0.86848
Vip|ENSMUSG00000019772	0.26564	-0.466488	0.0417054	0.631654	0.265611	0.0489112	0.813704	0.934101	0.265707	-0.426214	0.082099	0.295674	0.265729	-0.00225376	0.989917	0.999801	0.265917	-0.420432	0.0654496	0.230584
Fbxo5|ENSMUSG00000019773	0.535896	0.0745751	0.690823	0.991393	0.535893	0.075415	0.659888	0.865343	0.535865	0.272805	0.170443	0.450343	0.53584	-0.123871	0.394888	0.999801	0.535786	0.143257	0.443183	0.700163
Mtrf1l|ENSMUSG00000019774	2.97289	0.0191485	0.839289	0.994968	2.97295	0.143356	0.105826	0.353283	2.97287	0.193913	0.0523479	0.221822	2.97286	-0.0322621	0.66167	0.999801	2.9729	0.161701	0.0848102	0.273331
Rgs17|ENSMUSG00000019775	6.62002	0.020513	0.689523	0.991393	6.61996	0.061866	0.20074	0.503763	6.62002	0.0367018	0.506837	0.775973	6.62001	0.0428409	0.301832	0.999801	6.61996	0.0769245	0.13728	0.369198
Oprm1|ENSMUSG00000000766	2.41318	0.179127	0.289475	0.943213	2.41319	0.206674	0.188876	0.487517	2.41319	0.18665	0.301094	0.613786	2.41317	0.198368	0.152918	0.999801	2.41302	0.384841	0.0254592	0.119824
Ipcef1|ENSMUSG00000064065	3.48609	0.132622	0.229344	0.920433	3.48597	0.317807	0.00308127	0.0322887	3.48617	0.33484	0.0077955	0.0583577	3.48618	0.1041	0.233257	0.999801	3.48643	0.444075	0.00026972	0.00351418
Cnksr3|ENSMUSG00000015202	2.39843	-0.0891042	0.426134	0.977718	2.39852	0.00863732	0.936099	0.9797	2.39844	0.0533286	0.650884	0.858989	2.39844	-0.136428	0.136713	0.999801	2.39863	-0.0740632	0.51045	0.752436
Lrp11|ENSMUSG00000019796	5.45256	0.0701329	0.188275	0.893941	5.45242	-0.150535	0.00234787	0.0265294	5.45259	-0.0821085	0.148313	0.417841	5.45261	-0.00242747	0.95423	0.999801	5.45256	-0.0852764	0.108272	0.321154
Pcmt1|ENSMUSG00000019795	7.11678	-0.0145026	0.746841	0.991393	7.1167	-0.110796	0.00805158	0.0647103	7.11681	-0.12697	0.00774283	0.0581544	7.11683	-0.00342102	0.92337	0.999801	7.11685	-0.129441	0.00375782	0.028398
Nup43|ENSMUSG00000040034	1.74	-0.046735	0.720782	0.991393	1.73993	-0.0152722	0.90107	0.966155	1.74003	0.0742906	0.595788	0.827017	1.74005	-0.139034	0.184738	0.999801	1.74003	-0.0639731	0.62732	0.827596
Lats1|ENSMUSG00000040021	5.03427	0.0188891	0.748843	0.991393	5.03417	-0.041394	0.455599	0.744734	5.0343	-0.0454855	0.465167	0.747785	5.03431	0.0204207	0.661243	0.999801	5.0342	-0.0259425	0.658674	0.847334
Katna1|ENSMUSG00000019794	3.76461	0.0184567	0.813244	0.994968	3.76469	-0.0998659	0.171354	0.461143	3.76462	-0.0478546	0.564365	0.809228	3.76464	-0.0360493	0.561482	0.999801	3.7648	-0.0829726	0.28694	0.55916
Ginm1|ENSMUSG00000040006	3.74748	-0.00171041	0.982802	0.999487	3.74748	0.123506	0.0943349	0.328309	3.74746	0.103431	0.216772	0.514653	3.74745	0.0131786	0.832186	0.999801	3.7474	0.11915	0.129166	0.357509
6530403G13Rik|ENSMUSG00000052979	-0.870838	-0.4463	0.0843781	0.77994	-0.870897	0.130896	0.583687	0.82638	-0.870839	-0.354526	0.199852	0.49257	-0.870841	0.0213364	0.918391	0.999801	-0.870956	-0.314081	0.21664	0.478888
Ppil4|ENSMUSG00000015757	5.93028	-0.0816285	0.0960265	0.801229	5.93013	-0.0354145	0.441811	0.736789	5.93031	-0.12491	0.0163486	0.100822	5.93032	0.00376103	0.923152	0.999801	5.93023	-0.120311	0.0133435	0.0748096
Tab2|ENSMUSG00000015755	6.63156	-0.0669403	0.144285	0.856329	6.63146	0.0118543	0.783565	0.922267	6.63157	-0.0528235	0.276887	0.587894	6.63158	-0.00739328	0.838292	0.999801	6.63153	-0.0613023	0.179438	0.431954
Ust|ENSMUSG00000047712	5.58826	-0.0431291	0.606743	0.987824	5.58799	0.0783512	0.322697	0.636426	5.58828	0.0600984	0.499641	0.771494	5.58829	-0.0293563	0.657268	0.999801	5.58797	0.0264528	0.749037	0.892072
Sash1|ENSMUSG00000015305	6.80712	-0.037621	0.406249	0.97677	6.80722	-0.0249121	0.559818	0.810565	6.80711	-0.0809535	0.0916561	0.315375	6.80711	0.0166198	0.642702	0.999801	6.80724	-0.0617736	0.17172	0.421025
Samd5|ENSMUSG00000060487	3.806	-0.134377	0.0819204	0.771447	3.80599	-0.220888	0.00337138	0.0345486	3.80603	-0.311957	0.000427069	0.00634016	3.80607	-0.0483518	0.433697	0.999801	3.80624	-0.354452	3.98206e-05	0.000748837
Stxbp5|ENSMUSG00000019790	6.70163	0.00712193	0.875456	0.996828	6.70151	-0.114302	0.00737122	0.0608657	6.70167	-0.088493	0.0677047	0.262841	6.70169	-0.0230206	0.524891	0.999801	6.70165	-0.110407	0.0147562	0.0806143
Adgb|ENSMUSG00000050994	-0.716054	0.36956	0.363036	0.970269	-0.716605	-0.578303	0.105009	0.351427	-0.715927	-0.650809	0.160159	0.436085	NA	NA	NA	NA	-0.715959	-0.22556	0.582609	0.800278
Rab32|ENSMUSG00000019832	1.03895	-0.127246	0.422256	0.977718	1.03878	0.18819	0.2078	0.512206	1.03896	-0.0149382	0.929489	0.978854	1.03896	0.0732851	0.567515	0.999801	1.03874	0.0502859	0.750416	0.892977
Grm1|ENSMUSG00000019828	6.63803	-0.111991	0.0530463	0.67983	6.63797	-0.287731	4.78251e-06	0.000193672	6.63807	-0.395935	1.82029e-07	1.11813e-05	6.63811	-0.00765273	0.863498	0.999801	6.63825	-0.407412	3.69649e-08	2.31457e-06
Shprh|ENSMUSG00000090112	5.80989	-0.00423609	0.932904	0.997501	5.80974	-0.163892	0.000469714	0.00771663	5.80994	-0.158547	0.00300943	0.0287887	5.80997	-0.0137746	0.728899	0.999801	5.80991	-0.174034	0.000515033	0.00595668
4930432B10Rik|ENSMUSG00000097007	-1.29745	0.262953	0.358942	0.970269	-1.29762	-0.508946	0.0608641	0.251288	-1.29744	-0.191032	0.53143	0.790979	-1.29744	-0.0554234	0.809451	0.999801	-1.29762	-0.255435	0.380299	0.649563
Fbxo30|ENSMUSG00000047648	3.09934	-0.0910051	0.31671	0.953926	3.09934	0.134305	0.114235	0.369241	3.09936	0.0938952	0.32801	0.639913	3.09937	-0.0560633	0.434644	0.999801	3.09935	0.0374024	0.679097	0.858615
Epm2a|ENSMUSG00000055493	5.17235	0.0265287	0.642546	0.990949	5.17219	-0.161279	0.00233291	0.0264125	5.17238	-0.0943938	0.121423	0.371268	5.17241	-0.0483526	0.285335	0.999801	5.17231	-0.136369	0.0162794	0.0866105
Gm9797|ENSMUSG00000045455	1.19849	-0.130161	0.39609	0.972965	1.19847	0.190258	0.179668	0.474227	1.19849	-0.0229594	0.88708	0.96267	1.19849	0.0768983	0.52183	0.999801	1.1985	0.0530709	0.725032	0.879994
Utrn|ENSMUSG00000019820	7.45033	-0.0114639	0.798022	0.994794	7.45048	0.12023	0.00408111	0.0397579	7.4503	0.0664979	0.16481	0.441674	7.45028	0.0393604	0.26508	0.999801	7.45041	0.106057	0.0180642	0.0933182
Sf3b5|ENSMUSG00000078348	4.21114	0.0236312	0.741523	0.991393	4.21119	-0.0949022	0.154234	0.434187	4.21112	-0.00884755	0.907701	0.970984	4.21113	-0.0654977	0.248737	0.999801	4.21119	-0.0754156	0.289145	0.561408
Plagl1|ENSMUSG00000019817	4.4799	0.0595043	0.4083	0.97686	4.47984	0.0968616	0.161912	0.446577	4.4799	0.179101	0.0216232	0.122746	4.4799	-0.0279132	0.62374	0.999801	4.47981	0.157124	0.0345564	0.149168
Ltv1|ENSMUSG00000019814	4.17638	0.00997381	0.891171	0.997217	4.17635	0.159407	0.0183945	0.115349	4.17636	0.118455	0.12577	0.378154	4.17635	0.0476149	0.401892	0.999801	4.17631	0.161744	0.025167	0.118808
Phactr2|ENSMUSG00000062866	4.41843	0.0740634	0.280369	0.943213	4.41855	-0.0672891	0.290159	0.604403	4.41841	0.0477644	0.51077	0.778169	4.41841	-0.0428776	0.426294	0.999801	4.41857	0.00427769	0.949916	0.980585
Fuca2|ENSMUSG00000019810	5.12653	-0.026743	0.643824	0.990949	5.12654	0.179304	0.000935878	0.013295	5.12651	0.080799	0.187458	0.473828	5.12651	0.069511	0.127178	0.999801	5.12649	0.147883	0.0102899	0.0614975
Pex3|ENSMUSG00000019809	4.92432	0.0631353	0.297869	0.944181	4.92425	-0.105274	0.0609487	0.251288	4.92433	-0.0317711	0.622838	0.843715	4.92434	-0.0154246	0.747682	0.999801	4.92431	-0.0443245	0.46311	0.715834
Adat2|ENSMUSG00000019808	2.51177	-0.00834803	0.937462	0.997501	2.51145	0.14502	0.141947	0.416051	2.51179	-0.0357631	0.754875	0.909843	2.5118	0.166069	0.0528231	0.99191	2.51147	0.126531	0.235466	0.502316
Aig1|ENSMUSG00000019806	5.34957	0.0367646	0.499997	0.982515	5.34951	0.0950193	0.0622827	0.254919	5.34956	0.11615	0.0433881	0.195715	5.34955	0.0126472	0.768601	0.999801	5.34951	0.127556	0.0184606	0.0948241
Hivep2|ENSMUSG00000015501	8.11203	0.0877314	0.0491594	0.669366	8.11206	-0.124592	0.00302215	0.0318243	8.11204	-0.0847814	0.073019	0.275603	8.11206	0.0480668	0.173844	0.999801	8.11219	-0.0466179	0.294106	0.566433
Gm10335|ENSMUSG00000071532	1.62162	-0.146415	0.282842	0.943213	1.62166	0.0932609	0.46012	0.74764	1.62159	-0.0732497	0.613504	0.837894	1.62158	0.0179153	0.867235	0.999801	1.62159	-0.0544518	0.688777	0.863454
Gpr126|ENSMUSG00000039116	1.7322	0.281169	0.0347165	0.59872	1.73213	0.200307	0.101591	0.343538	1.7322	0.235429	0.100772	0.333933	1.73218	0.246116	0.0199931	0.801495	1.73218	0.473836	0.000359189	0.00445248
Vta1|ENSMUSG00000019868	5.3805	0.011596	0.831489	0.994968	5.38038	0.00582234	0.908662	0.969333	5.38051	0.0169281	0.768618	0.91554	5.38051	-0.00342504	0.93604	0.999801	5.38046	0.0110601	0.838097	0.935635
Gm8355|ENSMUSG00000093798	6.01767	0.000686355	0.991663	0.999487	6.01757	0.0330503	0.588606	0.828864	6.01769	-0.12379	0.085284	0.302627	6.01769	0.156774	0.00555193	0.502787	6.01771	0.0236548	0.716374	0.87629
Nmbr|ENSMUSG00000019865	-1.34833	0.493084	0.157167	0.870332	-1.34849	-0.45297	0.163983	0.449402	-1.34828	-0.0278687	0.940594	0.981775	-1.34826	0.0619592	0.829933	0.999801	-1.34827	0.0255692	0.941596	0.978499
Cited2|ENSMUSG00000039910	4.76355	0.141203	0.0253171	0.548041	4.76338	-0.0477985	0.414999	0.715059	4.7636	0.000815896	0.990336	0.996837	4.76362	0.0841462	0.091392	0.999801	4.76354	0.0904185	0.151291	0.391813
Gm20655|ENSMUSG00000093672	-1.15996	0.5235	0.0638595	0.721591	-1.15978	-0.25963	0.314185	0.627529	-1.15999	0.24204	0.406605	0.703343	-1.16001	0.0239069	0.911555	0.999801	-1.15995	0.273395	0.319049	0.5912
Txlnb|ENSMUSG00000039891	1.44464	0.280007	0.0764965	0.75349	1.44434	-0.0867003	0.542787	0.800616	1.44468	0.12325	0.460941	0.744824	1.44468	0.0663209	0.59481	0.999801	1.44453	0.196078	0.217263	0.479769
Heca|ENSMUSG00000039879	4.93142	-0.0448234	0.459383	0.978767	4.9314	0.078659	0.165836	0.452105	4.93143	0.0237552	0.712437	0.89007	4.93144	0.00458749	0.923618	0.999801	4.93146	0.0295567	0.624593	0.82593
Abracl|ENSMUSG00000078453	3.70304	0.0421726	0.59998	0.987824	3.70301	0.400719	9.35407e-07	4.95852e-05	3.703	0.304255	0.000333941	0.00524364	3.70297	0.135255	0.0302758	0.89404	3.70289	0.431113	8.30948e-07	3.02218e-05
Reps1|ENSMUSG00000019854	5.1513	0.0793953	0.166102	0.87426	5.15127	0.0437357	0.415393	0.715153	5.1513	0.0415229	0.494615	0.767619	5.15129	0.0793217	0.0811372	0.999801	5.15132	0.118452	0.0376673	0.158592
Ccdc28a|ENSMUSG00000059554	4.18926	-0.0511335	0.473901	0.978767	4.18915	0.0269566	0.687174	0.87882	4.18927	-0.0365353	0.630186	0.846949	4.18927	0.00889562	0.876174	0.999801	4.18915	-0.0308075	0.663962	0.850806
Gm10827|ENSMUSG00000096977	-0.348482	0.0202656	0.939845	0.997588	-0.348329	0.500715	0.0490898	0.221075	-0.348526	0.266637	0.340796	0.650178	-0.348558	0.25194	0.221126	0.999801	-0.348462	0.507618	0.0552833	0.206741
Nhsl1|ENSMUSG00000039835	4.18938	-0.129712	0.10451	0.814971	4.18938	0.183066	0.0166826	0.108245	4.18936	-0.0191086	0.817817	0.93634	4.18935	0.0716056	0.249887	0.999801	4.18926	0.0456885	0.554338	0.780227
Hebp2|ENSMUSG00000019853	0.70923	-0.386429	0.029244	0.568269	0.709293	0.221051	0.183429	0.478928	0.709215	-0.529149	0.00465032	0.0399391	0.709205	0.36406	0.00873032	0.591165	0.709392	-0.170845	0.329496	0.601846
D10Bwg1379e|ENSMUSG00000019852	6.03052	0.0989968	0.15823	0.87118	6.03036	-0.227285	0.00123634	0.0163905	6.03058	-0.0959963	0.201374	0.493999	6.03061	-0.035107	0.52846	0.999801	6.03048	-0.135143	0.0566539	0.210257
Perp|ENSMUSG00000019851	2.08211	0.0367832	0.760604	0.991393	2.0821	-0.0438597	0.695738	0.88448	2.0821	0.0804806	0.534748	0.792909	2.08209	-0.0959062	0.319734	0.999801	2.08213	-0.00128847	0.991426	0.997011
Tnfaip3|ENSMUSG00000019850	2.92855	0.305543	0.00160901	0.164148	2.9286	0.100782	0.253746	0.567241	2.92853	0.432168	2.52179e-05	0.000638977	2.92851	-0.031753	0.669702	0.999801	2.92854	0.395711	3.44817e-05	0.000663772
Ifngr1|ENSMUSG00000020009	3.78039	-0.0105081	0.892902	0.997217	3.78042	-0.00611647	0.932635	0.978737	3.78039	-0.0916871	0.267865	0.577821	3.78039	0.0705173	0.255517	0.999801	3.78046	-0.0219189	0.776873	0.906945
Il20ra|ENSMUSG00000020007	1.98884	-0.105263	0.391918	0.972161	1.98874	-0.200914	0.0740902	0.284675	1.9889	-0.542016	4.54239e-05	0.00104457	1.98894	0.227998	0.0187439	0.781658	1.98904	-0.312075	0.0105788	0.0627895
Slc35d3|ENSMUSG00000050473	5.80616	-0.0757082	0.158371	0.87118	5.80607	-0.0632514	0.208321	0.512449	5.80618	-0.105091	0.0680723	0.263551	5.80619	-0.0401177	0.342672	0.999801	5.80616	-0.147032	0.00887657	0.0549701
Pex7|ENSMUSG00000020003	4.73826	-0.0337302	0.593188	0.987824	4.73834	-0.0634755	0.280462	0.595787	4.73827	-0.023311	0.729408	0.898024	4.73828	-0.0791167	0.114714	0.999801	4.73842	-0.098112	0.117048	0.335877
Map3k5|ENSMUSG00000071369	4.69027	-0.0578136	0.365859	0.970269	4.6902	0.141236	0.0183336	0.115186	4.69028	0.127304	0.0620885	0.247987	4.69028	-0.0489936	0.333722	0.999801	4.69023	0.0752655	0.236726	0.504082
Map7|ENSMUSG00000019996	6.94731	0.111182	0.27539	0.941762	6.94757	-0.0386548	0.682389	0.876832	6.9473	0.0945195	0.376907	0.680584	6.9473	-0.0250637	0.752229	0.999801	6.94763	0.0776181	0.441757	0.699139
4933406P04Rik|ENSMUSG00000069713	-1.17709	0.141839	0.694721	0.991393	-1.17719	0.205303	0.533117	0.794249	-1.17709	0.136985	0.720267	0.89437	-1.1771	0.201084	0.492443	0.999801	-1.17726	0.343135	0.332798	0.60494
Bclaf1|ENSMUSG00000037608	7.59711	-0.0317993	0.475963	0.978767	7.59699	-0.0511213	0.223282	0.530365	7.59713	-0.0961519	0.0419989	0.191157	7.59715	0.00794634	0.822248	0.999801	7.59711	-0.0869328	0.0499641	0.19306
Mtfr2|ENSMUSG00000019992	-0.437116	-0.128293	0.606522	0.987824	-0.437043	0.372923	0.121482	0.382063	-0.437136	0.21768	0.408866	0.705382	-0.437142	0.0251801	0.895878	0.999801	-0.437183	0.245135	0.327064	0.599618
Pde7b|ENSMUSG00000019990	8.53031	-0.146162	0.00984996	0.387198	8.5303	0.0777119	0.129439	0.395471	8.5303	0.0412781	0.463505	0.746804	8.5303	-0.115925	0.00884191	0.591165	8.53032	-0.0789819	0.151296	0.391813
Ahi1|ENSMUSG00000019986	7.96557	0.0660095	0.323724	0.958805	7.96568	0.224409	0.00121628	0.0162439	7.96553	0.332973	4.52233e-05	0.00104135	7.9655	-0.0439104	0.409834	0.999801	7.96548	0.290564	0.000112665	0.00173983
Gm26577|ENSMUSG00000097923	0.271652	0.454596	0.025962	0.550333	0.271401	-0.287927	0.107865	0.357228	0.271686	0.0340778	0.875307	0.958922	0.27169	0.12939	0.413544	0.999801	0.271389	0.162862	0.424115	0.685433
Myb|ENSMUSG00000019982	-0.435883	-0.113919	0.639012	0.990949	-0.436473	-0.478749	0.029948	0.160185	-0.435783	-0.840991	0.00263141	0.0259536	-0.435757	0.230788	0.246385	0.999801	-0.435963	-0.603122	0.0163977	0.0870396
Hbs1l|ENSMUSG00000019977	5.4689	0.00509503	0.923778	0.997501	5.46883	-0.00272137	0.956412	0.98703	5.46889	-0.0416572	0.460103	0.744403	5.46889	0.0418483	0.319472	0.999801	5.46887	-0.00251143	0.962022	0.986303
Sgk1|ENSMUSG00000019970	7.01755	0.314739	0.095405	0.8005	7.01756	-0.298979	0.112854	0.36693	7.01761	0.152071	0.428133	0.721693	7.01766	-0.138561	0.374422	0.999801	7.01774	0.0367375	0.846174	0.938711
Gm7672|ENSMUSG00000097086	0.334745	0.334508	0.0786355	0.759278	0.335037	-0.297369	0.104334	0.349919	0.334701	0.127658	0.527805	0.788278	0.334684	-0.0899601	0.555577	0.999801	0.33509	0.0539057	0.773266	0.905253
Gm4895|ENSMUSG00000044268	4.10046	-0.0616201	0.399425	0.975231	4.10044	-0.049802	0.464015	0.750135	4.10046	-0.0702969	0.365574	0.670272	4.10047	-0.0456721	0.429389	0.999801	4.10055	-0.114193	0.113679	0.330795
H60b|ENSMUSG00000075297	-0.39585	0.22084	0.504864	0.983437	-0.396586	0.0989155	0.723816	0.896988	-0.395769	-0.276597	0.441071	0.732358	-0.395752	0.588217	0.0387793	0.95377	-0.396606	0.298965	0.368186	0.637796
Gm26528|ENSMUSG00000097586	-2.44104	-0.0654672	0.899957	0.997217	-2.44116	-0.545091	0.253609	0.567165	NA	NA	NA	NA	NA	NA	NA	NA	NA	NA	NA	NA
Gm5421|ENSMUSG00000097245	6.02223	0.0405079	0.402901	0.976292	6.02216	-0.209234	3.61015e-06	0.00015579	6.02225	-0.163487	0.00148607	0.016826	6.02227	-0.00762676	0.842958	0.999801	6.02229	-0.173121	0.000324974	0.00411633
Slc2a12|ENSMUSG00000037490	1.2063	0.0462705	0.780005	0.99217	1.20618	-0.0128476	0.932474	0.978737	1.20634	0.0234859	0.894513	0.965707	1.20633	0.00500793	0.970429	0.999801	1.20629	0.0410522	0.805849	0.920616
Tbpl1|ENSMUSG00000071359	5.86177	0.0194715	0.694779	0.991393	5.86171	-0.0265745	0.565838	0.814471	5.86178	0.0086255	0.870291	0.956937	5.86179	-0.0187973	0.63247	0.999801	5.86174	-0.0100503	0.838534	0.935766
Eya4|ENSMUSG00000010461	1.28889	0.368099	0.0467427	0.65612	1.28852	-0.26587	0.112676	0.366795	1.28894	0.136912	0.4721	0.751745	1.28895	-0.0426407	0.757529	0.999801	1.28888	0.096717	0.588741	0.803643
Rps12|ENSMUSG00000061983	0.759936	-0.202072	0.241037	0.927047	0.759955	0.0773633	0.630377	0.849788	0.759907	-0.043818	0.810646	0.932563	0.759901	-0.0830523	0.54254	0.999801	0.759826	-0.124386	0.465165	0.716936
Slc18b1|ENSMUSG00000037455	3.50998	0.202867	0.418441	0.977718	3.51041	0.207407	0.361666	0.67388	3.50993	0.327408	0.221027	0.520174	3.50989	0.0768275	0.690587	0.999801	3.51024	0.413386	0.0994868	0.303304
Stx7|ENSMUSG00000019998	6.80461	0.0340879	0.455	0.978124	6.80455	0.062566	0.143188	0.418066	6.80461	0.0716839	0.138635	0.400429	6.80461	0.0213034	0.552674	0.999801	6.8046	0.0909982	0.0455944	0.181001
Moxd1|ENSMUSG00000020000	2.98851	-0.0952999	0.30759	0.949368	2.98844	0.134458	0.123722	0.385159	2.98852	0.0281926	0.774905	0.91819	2.98853	0.00502242	0.946186	0.999801	2.98841	0.0345401	0.707823	0.871698
Ctgf|ENSMUSG00000019997	2.52866	-0.187778	0.559223	0.984789	2.52828	0.0167844	0.954588	0.986265	2.52873	-0.0219052	0.949668	0.983775	2.52878	-0.162357	0.524799	0.999801	2.52888	-0.175792	0.589412	0.803939
Enpp1|ENSMUSG00000037370	3.28329	0.191933	0.0281233	0.56264	3.28352	0.0976691	0.228148	0.537142	3.28324	0.325702	0.000440315	0.00650107	3.2832	-0.0418744	0.535287	0.999801	3.28359	0.292072	0.000770137	0.00812672
Enpp3|ENSMUSG00000019989	-0.762729	0.277386	0.354046	0.970269	-0.762801	0.0759788	0.786357	0.923837	-0.76276	0.468032	0.138954	0.400634	-0.762782	-0.123459	0.581253	0.999801	-0.762778	0.354494	0.231926	0.497711
Med23|ENSMUSG00000019984	5.50953	0.0797089	0.130741	0.852234	5.50951	-0.0778967	0.113684	0.368263	5.50953	-0.0166541	0.765567	0.914372	5.50954	0.0146408	0.725009	0.999801	5.50958	-0.000592546	0.990962	0.996911
Akap7|ENSMUSG00000039166	4.57175	0.0591685	0.368874	0.970269	4.57173	0.072573	0.240358	0.552281	4.57177	0.0462106	0.507799	0.776316	4.57177	0.0799376	0.124154	0.999801	4.5718	0.129654	0.0481269	0.188127
Epb4.1l2|ENSMUSG00000019978	7.14981	0.0489987	0.276909	0.941821	7.15001	0.226721	8.61107e-08	7.35796e-06	7.14975	0.267443	2.08921e-08	1.92432e-06	7.14972	0.00425947	0.903809	0.999801	7.14984	0.273276	3.30086e-09	3.16994e-07
Tmem200a|ENSMUSG00000049420	0.86212	0.0929813	0.582031	0.985843	0.862064	0.397072	0.0102047	0.0769046	0.862107	0.331982	0.0638914	0.253084	0.862078	0.158138	0.237426	0.999801	0.861963	0.475012	0.00373655	0.0282622
L3mbtl3|ENSMUSG00000039089	4.41626	0.0964757	0.201096	0.897221	4.41615	0.192875	0.00817953	0.0654427	4.41625	0.227033	0.00694678	0.0535127	4.41624	0.0585374	0.321167	0.999801	4.41609	0.28445	0.000475532	0.00557909
Arhgap18|ENSMUSG00000039031	4.2419	-0.0193911	0.800783	0.994794	4.24199	0.125277	0.0913248	0.32287	4.24188	0.168875	0.0446346	0.199447	4.24188	-0.0637404	0.300366	0.999801	4.24189	0.1042	0.173305	0.423073
Lama2|ENSMUSG00000019899	4.57544	0.0368344	0.656807	0.991393	4.57538	0.129043	0.103459	0.347804	4.57543	0.122236	0.166719	0.444424	4.57542	0.0406017	0.530416	0.999801	4.57532	0.164155	0.0532903	0.201626
Gm10145|ENSMUSG00000064208	1.94102	0.021757	0.859852	0.996047	1.94099	-0.0179709	0.875546	0.957289	1.94102	-0.161111	0.220671	0.519765	1.94103	0.161305	0.105061	0.999801	1.941	-0.0020339	0.98672	0.995573
Ptprk|ENSMUSG00000019889	3.84236	0.0112353	0.886188	0.99698	3.84226	0.115983	0.12705	0.39119	3.84237	0.0705683	0.394695	0.694721	3.84237	0.0510389	0.411349	0.999801	3.84244	0.126312	0.109039	0.322756
4930519F09Rik|ENSMUSG00000090126	-0.782779	-0.0738122	0.768337	0.9915	-0.782985	-0.0924001	0.697986	0.885436	-0.782782	-0.0393826	0.882006	0.960497	-0.782784	-0.135129	0.505212	0.999801	-0.782907	-0.158968	0.517392	0.756749
Gm9824|ENSMUSG00000095478	4.19517	0.0932724	0.195184	0.896661	4.19516	-0.0452983	0.495996	0.773515	4.19517	0.0102027	0.893749	0.96549	4.19518	0.0335256	0.555931	0.999801	4.19521	0.0400258	0.574497	0.794865
Gm9996|ENSMUSG00000056316	0.881787	-0.540822	0.00248767	0.204026	0.881646	-0.021934	0.890251	0.962123	0.881772	-0.456282	0.0140197	0.0901597	0.881796	-0.121362	0.355351	0.999801	0.881634	-0.554264	0.00210744	0.0180483
Soga3|ENSMUSG00000038916	5.85099	0.0252673	0.610335	0.987824	5.85091	-0.11799	0.0107696	0.079663	5.85101	-0.0862749	0.102549	0.337016	5.85102	-0.00817399	0.836648	0.999801	5.85103	-0.101844	0.0386846	0.161444
9330159F19Rik|ENSMUSG00000004360	6.73274	0.0536777	0.238141	0.924939	6.7327	-0.00170688	0.968121	0.991314	6.73275	0.00264302	0.956245	0.985407	6.73276	0.04729	0.189196	0.999801	6.73279	0.0474757	0.294317	0.566624
Echdc1|ENSMUSG00000019883	5.0406	-0.0514655	0.38458	0.971829	5.04058	0.0365823	0.508352	0.781028	5.04059	-0.00934269	0.881738	0.960497	5.0406	-0.0107342	0.818006	0.999801	5.04064	-0.0182724	0.755197	0.895041
Rnf146|ENSMUSG00000038876	5.67371	0.0298917	0.562364	0.984789	5.67366	0.0450425	0.350755	0.66295	5.67372	0.0808853	0.140228	0.402746	5.67372	-0.00983623	0.808638	0.999801	5.67374	0.0700043	0.172862	0.422492
Rspo3|ENSMUSG00000019880	1.23776	-0.0115547	0.939273	0.997501	1.23793	0.171436	0.225908	0.533768	1.23776	-0.0672368	0.68071	0.874729	1.23776	0.214133	0.0729442	0.999801	1.23796	0.160458	0.291791	0.564303
Gm10275|ENSMUSG00000069682	6.93901	-0.0609257	0.18028	0.882756	6.93899	-0.0277635	0.51388	0.784847	6.93901	-0.0874879	0.0691122	0.266134	6.93902	-0.00621326	0.861561	0.999801	6.93903	-0.0907391	0.0458743	0.18188
Cenpw|ENSMUSG00000075266	1.11966	0.114893	0.473598	0.978767	1.11963	0.262159	0.0714993	0.278901	1.11963	0.541893	0.00214703	0.0221317	1.11962	-0.177841	0.148723	0.999801	1.11954	0.373102	0.018258	0.0941487
Trmt11|ENSMUSG00000019792	2.91168	-0.0656011	0.492304	0.982104	2.91156	0.0459987	0.602762	0.835009	2.91167	-0.0455028	0.655012	0.861661	2.91167	0.017506	0.817063	0.999801	2.91157	-0.0143786	0.879555	0.952485
Hint3|ENSMUSG00000019791	3.12392	0.086148	0.33968	0.967444	3.12383	-0.139223	0.0959181	0.331668	3.12393	-0.0501153	0.602186	0.830966	3.12393	-0.00736956	0.918128	0.999801	3.1239	-0.0564237	0.528821	0.764131
Ncoa7|ENSMUSG00000039697	6.37412	-0.0736625	0.114099	0.83574	6.37403	-0.095253	0.0285472	0.154864	6.37415	-0.165485	0.000854768	0.0108473	6.37418	-0.00910719	0.806342	0.999801	6.37419	-0.173018	0.0001862	0.00261752
Hey2|ENSMUSG00000019789	2.55721	0.132953	0.237482	0.924939	2.55724	-0.106477	0.31259	0.626558	2.55722	0.0370494	0.756681	0.910274	2.55722	-0.00818957	0.928217	0.999801	2.5572	0.0169225	0.87999	0.952737
Gm5422|ENSMUSG00000039684	5.60543	-0.00104688	0.98393	0.999487	5.60536	-0.0712914	0.139003	0.411687	5.60545	-0.0682286	0.218416	0.516824	5.60547	-0.00835415	0.839586	0.999801	5.60546	-0.0789395	0.126914	0.35362
Hddc2|ENSMUSG00000000295	3.77059	-0.0491187	0.534607	0.984789	3.77067	0.282385	0.000133441	0.00286481	3.77053	0.247448	0.00317225	0.029861	3.7705	-0.0156009	0.800091	0.999801	3.77044	0.230967	0.00345199	0.0265206
Tpd52l1|ENSMUSG00000000296	5.63442	-0.0643029	0.318393	0.955179	5.63464	0.363579	9.5881e-07	5.0514e-05	5.63437	0.353062	1.29608e-05	0.000370691	5.63434	-0.0589041	0.24144	0.999801	5.63443	0.293247	7.3789e-05	0.00122819
Rnf217|ENSMUSG00000063760	2.86226	0.034469	0.745834	0.991393	2.8624	0.0344748	0.732066	0.900874	2.86225	0.167558	0.143342	0.408335	2.86225	-0.100469	0.236463	0.999801	2.86231	0.0662263	0.532995	0.766534
Nkain2|ENSMUSG00000069671	2.33908	0.102668	0.357816	0.970269	2.33899	-0.0822703	0.423378	0.722645	2.3391	0.0949641	0.427698	0.721476	2.33912	-0.0776042	0.379694	0.999801	2.33908	0.015162	0.892194	0.957567
Clvs2|ENSMUSG00000019785	4.68789	0.0348211	0.58444	0.986661	4.68772	-0.13561	0.0227539	0.13297	4.68793	-0.0794616	0.243234	0.548129	4.68794	-0.0261055	0.608958	0.999801	4.68787	-0.105431	0.0958272	0.296267
Gm10327|ENSMUSG00000071343	-0.890589	0.258657	0.48422	0.978891	-0.89084	-0.0749592	0.828444	0.939948	-0.890558	0.370988	0.341551	0.650595	-0.890543	-0.181487	0.528283	0.999801	-0.890628	0.15953	0.672464	0.855227
Rsph4a|ENSMUSG00000039552	1.14151	0.28094	0.166551	0.87426	1.1409	0.417122	0.0208592	0.125936	1.14156	0.338562	0.13895	0.400634	1.14151	0.335232	0.0440433	0.967681	1.14117	0.69631	0.00162056	0.0147507
Zufsp|ENSMUSG00000039531	3.15994	0.0033231	0.970298	0.999487	3.15989	0.1025	0.224868	0.532191	3.15995	0.126624	0.178702	0.461628	3.15995	-0.0250221	0.724263	0.999801	3.16002	0.0977135	0.266659	0.538166
Rwdd1|ENSMUSG00000019782	3.85613	-0.0612077	0.429616	0.977718	3.85603	0.0628003	0.382093	0.691221	3.85615	-0.0264997	0.748177	0.906672	3.85616	0.0232451	0.703336	0.999801	3.8561	-0.00291509	0.969798	0.989302
Fam26e|ENSMUSG00000049872	1.67776	0.155171	0.265501	0.937983	1.67759	-0.126092	0.318307	0.632161	1.6778	-0.0685877	0.640836	0.853916	1.6778	0.0907836	0.401353	0.999801	1.67787	0.0172822	0.899412	0.960369
Fam26f|ENSMUSG00000046031	-1.3953	0.554994	0.0830287	0.776762	-1.39534	0.338935	0.209447	0.513575	-1.39535	0.91579	0.00484016	0.0411318	-1.39539	-0.0227072	0.918174	0.999801	-1.39563	0.874286	0.00547943	0.038309
Dse|ENSMUSG00000039497	2.06387	0.0781121	0.529542	0.984789	2.06391	0.62485	4.25644e-07	2.62023e-05	2.06381	0.697567	8.89889e-07	4.10932e-05	2.06375	-0.00334026	0.971247	0.999801	2.06367	0.695646	2.93461e-07	1.2732e-05
Tspyl1|ENSMUSG00000047514	7.78388	-0.00585742	0.895796	0.997217	7.78375	-0.0865434	0.03847	0.188585	7.78391	-0.109874	0.0201891	0.116621	7.78393	0.0122757	0.729128	0.999801	7.78392	-0.0982451	0.0269999	0.124875
Gm26564|ENSMUSG00000097274	0.905477	0.000786132	0.99713	0.999917	0.905943	-0.211521	0.446049	0.739323	0.905643	-0.407787	0.283677	0.595145	0.905626	0.118355	0.639529	0.999801	0.90642	-0.190345	0.540581	0.771818
Tspyl4|ENSMUSG00000039485	9.14247	0.0162024	0.720777	0.991393	9.14234	-0.111017	0.00905961	0.0704705	9.1425	-0.147253	0.00228916	0.0232747	9.14252	0.0480928	0.184605	0.999801	9.14251	-0.101346	0.025498	0.119898
Nt5dc1|ENSMUSG00000039480	1.93812	-0.194601	0.124092	0.843285	1.938	0.32438	0.00523186	0.0474431	1.93809	0.213999	0.107987	0.347229	1.93808	-0.0962663	0.325631	0.999801	1.93787	0.1275	0.308093	0.581039
Frk|ENSMUSG00000019779	-1.47529	-0.281144	0.446286	0.977718	-1.47538	0.0225136	0.946432	0.983156	-1.47529	-0.135475	0.732811	0.899432	-1.47528	-0.149984	0.601818	0.999801	-1.47532	-0.256895	0.477816	0.727583
Amd2|ENSMUSG00000063953	3.44928	0.0785997	0.346941	0.969129	3.44919	0.00030969	0.996809	0.999186	3.4493	0.000985096	0.991233	0.996996	3.4493	0.0748799	0.263539	0.999801	3.44931	0.0692481	0.404838	0.670832
Hs3st5|ENSMUSG00000044499	4.15267	-0.0332288	0.650625	0.991393	4.15256	0.147003	0.0357866	0.179926	4.15266	0.0948457	0.227696	0.528896	4.15265	0.0132443	0.815603	0.999801	4.15255	0.104898	0.162574	0.408178
Hdac2|ENSMUSG00000019777	6.62319	0.0164915	0.718914	0.991393	6.62307	-0.116354	0.00638912	0.0548286	6.62321	-0.0888181	0.0689902	0.265848	6.62323	-0.0160054	0.659655	0.999801	6.62319	-0.104588	0.0220875	0.107937
Marcks|ENSMUSG00000069662	7.45598	0.179923	0.00192109	0.182802	7.45577	-0.0645705	0.201699	0.505204	7.456	0.0479439	0.39959	0.697676	7.456	0.0634534	0.141857	0.999801	7.45582	0.113923	0.0363691	0.154746
Lama4|ENSMUSG00000019846	2.3365	0.167269	0.144049	0.856329	2.33663	-0.216142	0.0487648	0.22011	2.33648	-0.0681821	0.56753	0.811195	2.33646	0.0222684	0.80217	0.999801	2.33656	-0.0527975	0.634972	0.831416
Fam229b|ENSMUSG00000051736	3.88892	0.0327739	0.667712	0.991393	3.88882	-0.0117996	0.869819	0.956289	3.88891	-0.0380622	0.634777	0.850366	3.88891	0.0548868	0.362884	0.999801	3.88881	0.0207326	0.782716	0.909577
Tube1|ENSMUSG00000019845	1.3746	0.0984029	0.495686	0.9825	1.37445	-0.0727971	0.586844	0.827726	1.37462	0.0710158	0.645223	0.856273	1.37463	-0.0499237	0.670816	0.999801	1.3745	0.0165606	0.907518	0.964736
Fyn|ENSMUSG00000019843	6.66622	-0.0234276	0.609945	0.987824	6.66627	0.0710995	0.0976644	0.335813	6.66621	0.0524018	0.283486	0.594962	6.6662	-0.00728496	0.840191	0.999801	6.66625	0.04135	0.367355	0.636809
Traf3ip2|ENSMUSG00000019842	-1.34467	0.388545	0.253722	0.933041	-1.34487	-0.175019	0.557143	0.809212	-1.34463	0.0434357	0.903176	0.96985	-1.34464	0.1643	0.546075	0.999801	-1.34471	0.210328	0.525072	0.762063
E130307A14Rik|ENSMUSG00000087177	4.9276	-0.0480132	0.428762	0.977718	4.92778	0.131243	0.0221493	0.130997	4.92755	0.119197	0.0633159	0.251385	4.92753	-0.0391756	0.410527	0.999801	4.92761	0.0830706	0.16734	0.414928
Rev3l|ENSMUSG00000019841	5.88986	0.0137002	0.782797	0.992536	5.88978	-0.0528682	0.255694	0.569374	5.88987	0.0104278	0.842828	0.946866	5.88988	-0.0561356	0.150984	0.999801	5.88982	-0.0407501	0.4093	0.673773
AA474331|ENSMUSG00000096687	3.84297	0.0679215	0.383791	0.971829	3.84279	-0.189714	0.00779584	0.0632468	3.843	-0.149851	0.0704093	0.269373	3.84302	0.0225952	0.710274	0.999801	3.84286	-0.127926	0.100692	0.305778
4930547M16Rik|ENSMUSG00000097890	-0.12478	-0.389047	0.0841485	0.77994	-0.125044	0.0385536	0.849755	0.94818	-0.124789	-0.195425	0.395292	0.695149	-0.124793	-0.173459	0.322776	0.999801	-0.12505	-0.355296	0.097427	0.299015
BC021785|ENSMUSG00000038528	-2.2239	-0.272254	0.470776	0.978767	-2.22398	-0.12194	0.73659	0.902559	-2.2239	-0.637569	0.117742	0.36621	-2.2239	0.230572	0.452293	0.999801	-2.22395	-0.404934	0.277679	0.548787
AI317395|ENSMUSG00000038522	-0.845467	-0.740706	0.0085581	0.354673	-0.845553	0.385784	0.122281	0.383252	-0.845466	-0.474737	0.0924388	0.317176	-0.84547	0.0929281	0.644799	0.999801	-0.845434	-0.360788	0.158643	0.40235
Slc16a10|ENSMUSG00000019838	0.432865	0.321022	0.126268	0.846649	0.432815	0.0868097	0.64257	0.857061	0.432849	0.73471	0.00202705	0.0213182	0.432846	-0.336701	0.0363766	0.936827	0.432829	0.40411	0.0537083	0.202859
Rpf2|ENSMUSG00000038510	3.92089	-0.0322175	0.673151	0.991393	3.92087	0.151793	0.0312503	0.164719	3.92089	0.0682225	0.401984	0.699837	3.92089	0.044366	0.462442	0.999801	3.92088	0.111269	0.142497	0.377534
Gtf3c6|ENSMUSG00000019837	3.88599	0.0297192	0.698132	0.991393	3.88591	0.105881	0.135276	0.405303	3.88599	0.073138	0.368005	0.672138	3.88598	0.0557292	0.3552	0.999801	3.88589	0.136744	0.0723532	0.246327
Amd1|ENSMUSG00000075232	5.74943	-0.0197502	0.695917	0.991393	5.74933	0.00975109	0.837013	0.942902	5.74946	-0.0389544	0.467176	0.749196	5.74947	0.0244576	0.541914	0.999801	5.74951	-0.0138126	0.78303	0.909577
Cdk19|ENSMUSG00000038481	7.45889	-0.160666	0.000350469	0.0785836	7.45897	0.106737	0.011441	0.0830862	7.45888	0.00739388	0.876583	0.959069	7.45888	-0.0671023	0.0562375	0.996196	7.45898	-0.0567288	0.205565	0.466057
Ddo|ENSMUSG00000063428	2.54174	0.063377	0.574228	0.984789	2.54163	-0.0192903	0.853625	0.950348	2.54175	0.00701363	0.952381	0.984439	2.54175	0.0297476	0.733446	0.999801	2.54185	0.035831	0.748948	0.892072
Mettl24|ENSMUSG00000045555	-0.644405	-0.519949	0.0365412	0.611985	-0.644427	-0.300987	0.20191	0.505388	-0.644453	-0.170799	0.51719	0.782314	-0.644438	-0.669006	0.000688026	0.226466	-0.644589	-0.808705	0.00103952	0.0103855
Cdc40|ENSMUSG00000038446	5.69683	0.01272	0.80369	0.994794	5.69672	-0.133998	0.00477426	0.0444868	5.69687	-0.106301	0.0505384	0.216402	5.6969	-0.0215069	0.595884	0.999801	5.69686	-0.12412	0.0146126	0.0799064
Wasf1|ENSMUSG00000019831	7.71636	0.0161405	0.717004	0.991393	7.71624	-0.0841163	0.0441468	0.206882	7.71638	-0.0231533	0.623639	0.844132	7.7164	-0.0500242	0.156605	0.999801	7.71633	-0.0722647	0.103247	0.310995
Gpr6|ENSMUSG00000046922	6.47273	-0.332289	1.94808e-05	0.0175727	6.4728	0.055644	0.370101	0.68064	6.47271	-0.096519	0.172046	0.452292	6.47273	-0.187375	0.000935782	0.262571	6.47285	-0.285641	0.000140893	0.00208341
Fig4|ENSMUSG00000038417	5.75277	-0.124149	0.0158057	0.490598	5.75282	0.125129	0.0112271	0.081955	5.75275	0.14432	0.00928179	0.0665616	5.75275	-0.148948	0.00055083	0.204956	5.75273	-0.00318112	0.949507	0.980585
Ak9|ENSMUSG00000091415	-0.394342	0.14689	0.600784	0.987824	-0.394786	0.273287	0.243921	0.556808	-0.394326	0.457985	0.130066	0.386028	-0.394364	-0.05871	0.779002	0.999801	-0.394572	0.420344	0.136021	0.367379
Zbtb24|ENSMUSG00000019826	3.78322	0.0317559	0.686367	0.991393	3.78325	0.0027695	0.969693	0.991581	3.78321	0.110868	0.183682	0.468353	3.78322	-0.0811707	0.186703	0.999801	3.78326	0.0308707	0.693245	0.866164
Mical1|ENSMUSG00000019823	3.43365	0.0579702	0.493598	0.982104	3.43373	-0.013719	0.861737	0.952709	3.43361	0.0626828	0.484862	0.761444	3.43359	-0.0199385	0.760916	0.999801	3.43355	0.0408789	0.629747	0.828834
Smpd2|ENSMUSG00000019822	3.50044	0.0937359	0.262337	0.936881	3.50044	0.200842	0.00968139	0.0738685	3.50039	0.259861	0.00326441	0.0305106	3.50037	0.0310344	0.635554	0.999801	3.50031	0.290036	0.000456762	0.00539592
Ppil6|ENSMUSG00000078451	1.15114	-0.371855	0.0186324	0.508495	1.15119	0.482484	0.00153187	0.0192254	1.1511	0.0193479	0.906563	0.970981	1.15107	0.0799137	0.506208	0.999801	1.15105	0.113918	0.460586	0.71361
Cd164|ENSMUSG00000019818	6.27271	-0.0430701	0.362208	0.970269	6.27268	0.0527968	0.233764	0.544392	6.2727	0.000968868	0.984641	0.995306	6.2727	0.00477108	0.898519	0.999801	6.27271	0.00823745	0.861499	0.945109
Ccdc162|ENSMUSG00000075225	-1.46478	-0.0521447	0.87503	0.996817	-1.46532	-0.430639	0.146881	0.424277	-1.46467	-0.495225	0.20526	0.499364	NA	NA	NA	NA	-1.46484	-0.48186	0.163743	0.409911
Cep57l1|ENSMUSG00000019813	2.89126	0.0325334	0.73572	0.991393	2.8912	-0.0571126	0.521698	0.789511	2.89127	-0.0877233	0.391074	0.691625	2.89128	0.0571768	0.452976	0.999801	2.8913	-0.0298213	0.754943	0.895
Sesn1|ENSMUSG00000038332	5.94916	-0.0319343	0.515612	0.984789	5.94907	-0.0296301	0.517183	0.786934	5.94918	-0.00815452	0.875985	0.958958	5.9492	-0.0597049	0.126606	0.999801	5.94917	-0.0644412	0.186643	0.442055
Armc2|ENSMUSG00000071324	3.12574	-0.00483857	0.956888	0.999369	3.12573	-0.0178222	0.83274	0.942057	3.12574	0.0205845	0.827621	0.940771	3.12575	-0.0467982	0.513287	0.999801	3.12572	-0.0206138	0.815312	0.924236
Gm9855|ENSMUSG00000085666	1.76144	-0.687089	0.321661	0.95794	1.76125	0.870525	0.193059	0.492468	1.7616	-0.725358	0.311886	0.624648	1.76165	0.910099	0.107874	0.999801	1.76098	0.18112	0.783277	0.909577
Foxo3|ENSMUSG00000048756	6.75557	0.0224956	0.622461	0.988533	6.75554	-0.0794491	0.0644432	0.261102	6.75558	-0.0211639	0.661465	0.864198	6.7556	-0.0404312	0.262989	0.999801	6.75561	-0.0601687	0.18642	0.441856
Lace1|ENSMUSG00000038302	4.12837	0.0563374	0.437845	0.977718	4.12832	-0.0755556	0.262573	0.576466	4.12838	-0.00621016	0.936363	0.981399	4.12838	-0.0161862	0.779854	0.999801	4.12839	-0.027295	0.705843	0.871608
Snx3|ENSMUSG00000019804	7.21421	0.0621938	0.166502	0.87426	7.21417	-0.0152074	0.715794	0.893834	7.21421	-0.00190294	0.96825	0.990095	7.21421	0.0464994	0.190714	0.999801	7.21424	0.0376683	0.401182	0.667686
Nr2e1|ENSMUSG00000019803	4.51687	0.131501	0.0502108	0.669924	4.51698	-0.0591795	0.344216	0.657463	4.51686	0.0727333	0.307869	0.621253	4.51686	0.000946986	0.985598	0.999801	4.51698	0.0607234	0.364197	0.63371
Ostm1|ENSMUSG00000038280	5.83139	-0.098939	0.0476612	0.66036	5.83134	0.0803057	0.0864237	0.312266	5.83138	0.0257667	0.627115	0.845622	5.83139	-0.0501629	0.202717	0.999801	5.83135	-0.0211009	0.670708	0.854328
Sec63|ENSMUSG00000019802	6.09119	0.0620404	0.198491	0.896661	6.09117	-0.00370399	0.934392	0.979145	6.09119	0.0584245	0.255515	0.563181	6.09119	-0.00422082	0.911946	0.999801	6.09119	0.0522467	0.276954	0.548249
Scml4|ENSMUSG00000044770	-0.852657	0.602712	0.0348647	0.599344	-0.852767	0.00610553	0.980314	0.994507	-0.852682	0.620128	0.0415448	0.189919	-0.852702	-0.011512	0.957791	0.999801	-0.852933	0.613249	0.0301519	0.135247
Sobp|ENSMUSG00000038248	4.49317	0.147943	0.028579	0.56264	4.4932	0.162567	0.0100562	0.0760188	4.49315	0.302667	2.80668e-05	0.000698897	4.49314	0.00751783	0.887127	0.999801	4.49312	0.298233	1.36629e-05	0.000312237
9030612E09Rik|ENSMUSG00000045008	-1.47558	0.00268863	0.994239	0.999692	-1.47584	0.0489613	0.875445	0.957289	-1.47556	0.114883	0.762877	0.913244	-1.47558	-0.0796448	0.771012	0.999801	-1.4757	0.0509785	0.884845	0.954084
Pdss2|ENSMUSG00000038240	3.27702	0.0299438	0.730541	0.991393	3.27704	0.0166634	0.837016	0.942902	3.27702	0.0241744	0.794059	0.925808	3.27703	0.01931	0.778823	0.999801	3.27706	0.042148	0.625445	0.826417
Bend3|ENSMUSG00000038214	2.08675	0.156874	0.24139	0.927047	2.08661	0.101219	0.405365	0.708361	2.08671	0.266602	0.0642945	0.254035	2.08669	-0.0192961	0.851385	0.999801	2.08646	0.249262	0.0625788	0.223885
Gm9803|ENSMUSG00000045886	4.00286	0.0423577	0.570652	0.984789	4.00281	-0.0163097	0.81534	0.934639	4.00286	0.00365691	0.963183	0.988039	4.00287	0.0205858	0.728891	0.999801	4.00285	0.0195648	0.791494	0.912939
1700021F05Rik|ENSMUSG00000019797	4.116	-0.0497532	0.498439	0.982515	4.11591	0.0778704	0.254272	0.567748	4.11599	-0.0549507	0.480962	0.757948	4.11599	0.0790718	0.17027	0.999801	4.11589	0.0237444	0.744849	0.889946
Cd24a|ENSMUSG00000047139	3.16772	0.088033	0.430262	0.977718	3.16724	-0.027243	0.791583	0.925523	3.16777	0.0090563	0.93967	0.981775	3.16776	0.0369113	0.679619	0.999801	3.16753	0.0555956	0.6211	0.823669
Qrsl1|ENSMUSG00000019863	4.02287	0.0765139	0.307449	0.949368	4.02285	0.0732626	0.292843	0.607533	4.02286	0.131775	0.0972617	0.327533	4.02286	0.0157556	0.787714	0.999801	4.02281	0.144026	0.0535325	0.202408
Rtn4ip1|ENSMUSG00000019864	4.03759	-0.0865291	0.237714	0.924939	4.03752	0.0132745	0.846551	0.946594	4.03759	-0.057779	0.457899	0.743013	4.03759	-0.0196845	0.738423	0.999801	4.03754	-0.0765247	0.292658	0.564996
Aim1|ENSMUSG00000019866	0.107346	-0.322631	0.114147	0.83574	0.107281	0.242589	0.206595	0.510837	0.107305	-0.162918	0.450373	0.73786	0.107289	0.0761746	0.643775	0.999801	0.107152	-0.0689087	0.7297	0.882317
Atg5|ENSMUSG00000038160	4.68538	-0.0501959	0.434413	0.977718	4.68536	0.0288816	0.63006	0.849788	4.68538	-0.00811558	0.905495	0.970408	4.68538	-0.0166362	0.741937	0.999801	4.68545	-0.0259337	0.684783	0.861287
Prdm1|ENSMUSG00000038151	-0.0460242	0.0859816	0.68524	0.991393	-0.0458441	0.148142	0.455849	0.745001	-0.0460225	0.342274	0.132604	0.390473	-0.0460186	-0.106983	0.527897	0.999801	-0.0458804	0.229852	0.27322	0.545222
Prep|ENSMUSG00000019849	4.64963	0.0909381	0.160668	0.871395	4.64957	-0.0927163	0.122818	0.384209	4.64964	-0.0164972	0.811471	0.933022	4.64966	0.0117113	0.819924	0.999801	4.64965	-0.00941625	0.884182	0.954043
Popdc3|ENSMUSG00000019848	0.358021	-0.29178	0.14499	0.856329	0.357978	0.141261	0.444155	0.738396	0.358018	-0.276211	0.188309	0.475058	0.358032	0.122619	0.420219	0.999801	0.357961	-0.162262	0.409246	0.673773
Bves|ENSMUSG00000071317	2.09754	0.0877416	0.469859	0.978767	2.09772	0.366577	0.00110358	0.0150309	2.09751	0.34185	0.00808644	0.0598899	2.09749	0.111223	0.234	0.999801	2.09761	0.445157	0.000247579	0.00329604
Lin28b|ENSMUSG00000063804	3.70244	0.125699	0.183483	0.888378	3.70244	0.0914797	0.303736	0.618162	3.70243	0.107404	0.274119	0.584686	3.70242	0.109614	0.143866	0.999801	3.70234	0.22033	0.021622	0.106453
Hace1|ENSMUSG00000038822	6.22056	-0.065531	0.168747	0.87426	6.22046	-0.0868371	0.0503226	0.22482	6.22058	-0.167651	0.000957064	0.0118729	6.2206	0.00929434	0.80482	0.999801	6.22058	-0.155021	0.00105868	0.0105399
Grik2|ENSMUSG00000056073	7.84858	-0.11502	0.0351375	0.600632	7.84881	0.19402	0.000383825	0.00654637	7.84853	0.161558	0.00700513	0.0538653	7.84851	-0.0878202	0.0375238	0.950851	7.84866	0.0749876	0.161555	0.40672
Ascc3|ENSMUSG00000038774	5.14911	-0.0302273	0.597132	0.987824	5.14905	0.0143171	0.788282	0.924602	5.14914	-0.0194291	0.750421	0.90786	5.14915	-0.000681692	0.988062	0.999801	5.14913	-0.0202179	0.722433	0.879139
Lilrb4|ENSMUSG00000062593	-1.98111	0.304843	0.418188	0.977718	-1.98106	-0.0494383	0.884562	0.960205	-1.98111	-0.14346	0.721114	0.894449	NA	NA	NA	NA	-1.98105	0.243578	0.529675	0.764337
Dcbld1|ENSMUSG00000019891	4.22503	0.114651	0.113804	0.834948	4.22516	0.463083	3.71998e-11	1.38893e-08	4.22495	0.668613	1.02575e-13	1.25522e-10	4.2249	-0.095373	0.0884911	0.999801	4.22482	0.571564	9.86082e-13	5.26259e-10
Gopc|ENSMUSG00000019861	5.94606	-0.0566632	0.248392	0.930311	5.94596	0.0465757	0.308938	0.6236	5.94607	0.00416696	0.936374	0.981399	5.94607	-0.0211323	0.585957	0.999801	5.94601	-0.0148682	0.760448	0.897829
Nus1|ENSMUSG00000023068	7.37357	-0.0787158	0.0800393	0.76324	7.37356	0.0212939	0.613904	0.840862	7.37358	-0.0182191	0.701816	0.885905	7.37359	-0.0435369	0.218404	0.999801	7.37365	-0.0640739	0.152728	0.393479
Zfa-ps|ENSMUSG00000049576	-0.352652	-0.0697151	0.757945	0.991393	-0.352783	-0.31243	0.135074	0.405008	-0.352637	-0.421613	0.074955	0.280316	-0.352628	0.041553	0.819788	0.999801	-0.352644	-0.389569	0.0790831	0.260874
Slc35f1|ENSMUSG00000038602	6.79233	0.0559573	0.220814	0.91246	6.79236	0.0870313	0.0406806	0.195931	6.79231	0.195453	0.000160049	0.00295151	6.7923	-0.0585951	0.10376	0.999801	6.79232	0.136299	0.00317926	0.0248497
Pln|ENSMUSG00000038583	-0.149697	0.630941	0.0297384	0.573326	-0.149777	-0.255648	0.304083	0.618429	-0.149705	0.161163	0.585585	0.820878	-0.149731	0.216938	0.315563	0.999801	-0.149616	0.362542	0.194735	0.451363
Cep85l|ENSMUSG00000038594	3.20037	-0.0332518	0.706107	0.991393	3.20033	0.0621471	0.451642	0.742576	3.20038	0.0287155	0.757955	0.910857	3.20038	-0.00482493	0.944762	0.999801	3.20034	0.0279481	0.749827	0.892593
Asf1a|ENSMUSG00000019857	3.8795	-0.122133	0.110845	0.828835	3.8794	0.0883524	0.214462	0.519958	3.87952	-0.0127705	0.875308	0.958922	3.87953	-0.0281207	0.641991	0.999801	3.87951	-0.0395859	0.599744	0.811656
Mcm9|ENSMUSG00000058298	2.93551	0.0278642	0.798966	0.994794	2.93537	0.0918866	0.362591	0.674222	2.9355	0.150634	0.196903	0.487831	2.93549	-0.0390065	0.647736	0.999801	2.93534	0.115349	0.290242	0.562707
Fam184a|ENSMUSG00000019856	5.59157	-0.121651	0.0193494	0.509232	5.5915	-0.0219478	0.654844	0.863489	5.59159	-0.15201	0.005594	0.0456147	5.5916	0.00530392	0.897603	0.999801	5.59162	-0.151345	0.0033495	0.0258727
Man1a|ENSMUSG00000003746	6.91907	0.000824469	0.991499	0.999487	6.91925	0.256321	0.00116792	0.0157787	6.919	0.367278	0.000101703	0.0020331	6.91896	-0.113998	0.0646978	0.999801	6.91904	0.250628	0.00289619	0.0230696
Gm16998|ENSMUSG00000097069	-0.038383	-0.0034693	0.987113	0.999487	-0.0382788	-0.0594791	0.761221	0.911734	-0.0384192	0.211106	0.353702	0.660543	-0.0384378	-0.287902	0.0833527	0.999801	-0.0384469	-0.059592	0.779078	0.907702
Msl3l2|ENSMUSG00000047669	3.69228	-0.0300094	0.715286	0.991393	3.6921	-0.0494754	0.515615	0.785995	3.69228	-0.123481	0.164804	0.441674	3.69228	0.0359074	0.581801	0.999801	3.69218	-0.0853309	0.304328	0.577251
Tbc1d32|ENSMUSG00000038122	4.40721	0.0946377	0.167194	0.87426	4.40713	-0.0984936	0.120933	0.381266	4.40723	-0.0464491	0.525293	0.787178	4.40724	0.03702	0.4943	0.999801	4.40719	-0.00667238	0.922218	0.970567
Gja1|ENSMUSG00000050953	7.68953	-0.0325861	0.505238	0.983437	7.6896	0.044718	0.329036	0.642036	7.68951	-0.0183169	0.723044	0.895416	7.6895	0.0268592	0.487814	0.999801	7.68954	0.0115112	0.812278	0.922903
Gm9795|ENSMUSG00000045048	0.120684	0.0746192	0.719206	0.991393	0.120542	-0.0583089	0.754672	0.910153	0.120698	-0.0591368	0.791062	0.924967	0.120703	0.0649507	0.686637	0.999801	0.120742	0.0137468	0.946858	0.980021
Hsf2|ENSMUSG00000019878	4.77295	0.0717598	0.255076	0.933282	4.77296	0.0723081	0.218888	0.525063	4.77294	0.182517	0.00677219	0.0526412	4.77294	-0.0435589	0.380948	0.999801	4.77293	0.140931	0.0250078	0.118271
Serinc1|ENSMUSG00000019877	9.93031	0.022544	0.625439	0.989605	9.93014	-0.112698	0.00913144	0.0708766	9.93035	-0.102	0.0374605	0.177875	9.93037	0.00586044	0.87277	0.999801	9.93032	-0.0941803	0.0406072	0.166941
Pkib|ENSMUSG00000019876	0.635913	-0.156379	0.375838	0.971128	0.636079	0.0158101	0.924931	0.975424	0.63587	0.0556589	0.765494	0.914372	0.635863	-0.19299	0.172213	0.999801	0.635996	-0.135753	0.434995	0.693638
Fabp7|ENSMUSG00000019874	3.57897	-0.0520729	0.691301	0.991393	3.57909	0.316544	0.0149413	0.0999673	3.57892	0.375435	0.010616	0.0736329	3.57888	-0.116257	0.26476	0.999801	3.57884	0.272506	0.0447847	0.178908
Smpdl3a|ENSMUSG00000019872	5.21968	0.0552307	0.329805	0.961804	5.21974	0.0474896	0.366271	0.677326	5.21966	0.10503	0.0807061	0.292874	5.21965	-0.00698104	0.87472	0.999801	5.21968	0.0990839	0.0781366	0.258869
Gcc2|ENSMUSG00000038039	6.9116	-0.034569	0.444423	0.977718	6.91149	-0.0759882	0.0717669	0.279583	6.91162	-0.0829611	0.0846745	0.301401	6.91164	-0.0322955	0.367828	0.999801	6.91162	-0.117864	0.00896905	0.0554402
Lims1|ENSMUSG00000019920	3.45654	0.078192	0.346508	0.969129	3.45664	-0.0375725	0.629987	0.849788	3.45654	0.0305833	0.730323	0.898521	3.45654	0.011138	0.86657	0.999801	3.45664	0.0357169	0.664911	0.851259
Ranbp2|ENSMUSG00000003226	8.03605	-0.0436218	0.329056	0.961359	8.03605	-0.15705	0.000311422	0.00557735	8.03612	-0.240272	4.76761e-06	0.000160469	8.03616	0.0368466	0.297238	0.999801	8.03634	-0.206277	2.0437e-05	0.000436142
Ccdc138|ENSMUSG00000038010	1.7552	-0.114451	0.388068	0.971865	1.75514	0.180039	0.139803	0.413053	1.75519	0.105816	0.45152	0.738466	1.75519	-0.0436446	0.671549	0.999801	1.75508	0.0606483	0.64502	0.837904
Edar|ENSMUSG00000003227	-0.280853	0.202179	0.453509	0.977718	-0.281062	-0.377606	0.134362	0.40372	-0.280798	-0.290875	0.318449	0.63035	-0.28078	0.111282	0.623804	0.999801	-0.280799	-0.199187	0.464399	0.716487
Gm9987|ENSMUSG00000055958	-1.46811	-0.217241	0.45879	0.978767	-1.4681	0.473388	0.0895303	0.319021	-1.46811	-0.607119	0.0471484	0.206743	-1.46813	0.860365	0.000679518	0.226466	-1.4682	0.258083	0.344016	0.614171
Sh3rf3|ENSMUSG00000037990	5.08969	0.037187	0.65941	0.991393	5.08994	0.216098	0.00973938	0.074212	5.08964	0.210178	0.0247262	0.134736	5.08962	0.0468193	0.479387	0.999801	5.08979	0.243028	0.00664059	0.044058
Sept10|ENSMUSG00000019917	2.67113	-0.0962848	0.344526	0.968869	2.67106	0.0409093	0.666578	0.869265	2.67113	-0.0955369	0.377474	0.681298	2.67113	0.0317004	0.692648	0.999801	2.67113	-0.0593288	0.556093	0.780688
Sowahc|ENSMUSG00000098188	3.45402	-0.0985555	0.238499	0.924939	3.45396	0.0692889	0.372508	0.682216	3.45402	-0.00713556	0.935859	0.98104	3.45401	-0.028253	0.666991	0.999801	3.45396	-0.0337137	0.684575	0.861287
Sowahc|ENSMUSG00000071286	3.45389	-0.0988192	0.237276	0.924939	3.45382	0.0692379	0.372873	0.682681	3.45389	-0.00747174	0.93285	0.979799	3.45388	-0.0282423	0.667118	0.999801	3.45383	-0.0340346	0.681744	0.859689
P4ha1|ENSMUSG00000019916	6.4148	-0.128993	0.0382282	0.614628	6.41505	0.0870906	0.127716	0.392262	6.4148	-0.0183498	0.774172	0.917931	6.41482	-0.0215343	0.651609	0.999801	6.41518	-0.0525254	0.386235	0.654914
Gm10273|ENSMUSG00000069622	-1.236	-0.298209	0.264907	0.937983	-1.23602	-0.290249	0.260636	0.574416	-1.23597	-0.585709	0.0440287	0.197574	-1.23595	-0.0113101	0.959598	0.999801	-1.23592	-0.577753	0.0308624	0.137709
Mcu|ENSMUSG00000009647	5.12597	0.106396	0.0638692	0.721591	5.12589	0.000834819	0.987533	0.996609	5.12599	-0.0110383	0.857097	0.951577	5.12599	0.117901	0.0102611	0.619343	5.12591	0.101428	0.0774501	0.258105
Micu1|ENSMUSG00000020111	7.07859	-0.0126873	0.778387	0.99206	7.07865	0.0730324	0.0826078	0.303679	7.07858	0.0791158	0.0981527	0.328774	7.07858	-0.0218563	0.538373	0.999801	7.07863	0.0555461	0.216834	0.479007
Dnajb12|ENSMUSG00000020109	5.43949	-0.00194945	0.970896	0.999487	5.43945	-0.130787	0.00855433	0.0677991	5.43949	-0.129361	0.02212	0.124658	5.43951	-0.00676193	0.872618	0.999801	5.43952	-0.138109	0.00927935	0.0567518
Ddit4|ENSMUSG00000020108	5.05115	0.132226	0.259324	0.935211	5.05113	-0.167358	0.128963	0.394819	5.05116	-0.0150035	0.903574	0.969867	5.05119	-0.0223123	0.811402	0.999801	5.05115	-0.0370268	0.749043	0.892072
Ascc1|ENSMUSG00000044475	3.9155	-0.00113291	0.988108	0.999487	3.91538	-0.068931	0.326275	0.640211	3.91552	-0.109066	0.178599	0.461572	3.91554	0.0328285	0.587627	0.999801	3.91551	-0.0739888	0.327304	0.599749
Anapc16|ENSMUSG00000020107	5.72475	-0.113192	0.0266753	0.553339	5.72468	-0.0515766	0.277158	0.592064	5.72476	-0.104614	0.0536286	0.225298	5.72478	-0.0656801	0.102916	0.999801	5.72476	-0.168324	0.000896048	0.00922158
Spock2|ENSMUSG00000058297	8.98464	0.0396322	0.379768	0.971278	8.98457	-0.225103	1.10608e-07	9.04619e-06	8.98467	-0.159827	0.000898162	0.0113142	8.9847	-0.027936	0.438995	0.999801	8.9847	-0.191417	2.14807e-05	0.000455572
Chst3|ENSMUSG00000057337	2.34637	0.104202	0.34745	0.969129	2.34639	-0.0866107	0.398618	0.703715	2.34637	0.043518	0.711141	0.889869	2.34637	-0.0324486	0.712004	0.999801	2.34641	0.0201641	0.855393	0.942327
Psap|ENSMUSG00000004207	10.3943	0.0560791	0.228491	0.91905	10.3943	-0.058324	0.181788	0.477183	10.3943	-0.0213603	0.664642	0.865954	10.3943	0.016679	0.650281	0.999801	10.3943	-0.00660436	0.886886	0.955365
4632428N05Rik|ENSMUSG00000020101	4.16179	-0.0304811	0.674254	0.991393	4.16189	-0.0639847	0.343195	0.656388	4.16176	-0.0816943	0.287586	0.599674	4.16176	-0.0122303	0.830348	0.999801	4.1618	-0.0989995	0.168189	0.415986
Gm17455|ENSMUSG00000090439	-2.17475	0.358932	0.370234	0.970696	-2.17499	-0.497384	0.151451	0.429625	-2.17471	-0.161877	0.703758	0.886892	-2.17472	-0.000519402	0.992363	0.999801	NA	NA	NA	NA
Cdh23|ENSMUSG00000012819	0.224557	0.548234	0.0161749	0.495039	0.224606	-0.588126	0.00744947	0.0612762	0.224588	0.175378	0.448571	0.736919	0.224606	-0.199374	0.265144	0.999801	0.224715	-0.0468994	0.829369	0.930799
Slc29a3|ENSMUSG00000020100	4.60204	0.0474948	0.469607	0.978767	4.60218	0.157811	0.0102589	0.0771779	4.602	0.184047	0.00811753	0.0600072	4.60198	0.0191782	0.709399	0.999801	4.60208	0.202672	0.00201338	0.0174793
Unc5b|ENSMUSG00000020099	5.73813	-0.0881846	0.102814	0.813717	5.73821	-0.0133746	0.790957	0.925492	5.73812	-0.0131522	0.813623	0.933999	5.73811	-0.092614	0.0327055	0.91247	5.73823	-0.105827	0.0509605	0.195801
Gm26947|ENSMUSG00000098055	-0.334362	-0.55823	0.0347236	0.59872	-0.334485	0.0861899	0.714189	0.893446	-0.334388	-0.292256	0.281119	0.592603	-0.334371	-0.196695	0.316404	0.999801	-0.334492	-0.47865	0.0633506	0.225513
Pcbd1|ENSMUSG00000020098	1.37929	0.163982	0.261623	0.936604	1.37922	0.0079544	0.953184	0.98565	1.37927	0.102353	0.511708	0.778712	1.37927	0.0700357	0.544837	0.999801	1.37923	0.166412	0.252883	0.523204
Sgpl1|ENSMUSG00000020097	5.37079	0.0325615	0.549838	0.984789	5.37083	0.041456	0.414355	0.714298	5.37077	0.0885229	0.124644	0.376449	5.37076	-0.0190424	0.656111	0.999801	5.37077	0.0712319	0.188596	0.44369
Pald1|ENSMUSG00000020092	3.54806	0.0106524	0.897471	0.997217	3.54823	0.235994	0.00214029	0.0247872	3.54799	0.251547	0.00402303	0.0359726	3.54796	-0.00968448	0.879996	0.999801	3.54794	0.245129	0.00272541	0.0220692
Nodal|ENSMUSG00000037171	-0.616959	0.281137	0.275385	0.941762	-0.616954	-0.357412	0.147477	0.425415	-0.616982	-0.242453	0.369034	0.673474	-0.617007	0.160892	0.428989	0.999801	-0.616863	-0.0906198	0.7165	0.876349
Eif4ebp2|ENSMUSG00000020091	4.40301	0.105147	0.126632	0.846649	4.4031	-0.0311934	0.626018	0.847671	4.40302	0.0286133	0.695278	0.881146	4.40303	0.0457187	0.400119	0.999801	4.40317	0.0656291	0.334889	0.60663
Lrrc20|ENSMUSG00000037151	4.80163	-0.0717157	0.248778	0.930311	4.80158	-0.0990526	0.0864429	0.312266	4.80165	-0.153296	0.0206821	0.118464	4.80167	-0.0235211	0.635623	0.999801	4.80166	-0.174517	0.00470085	0.0340205
Ppa1|ENSMUSG00000020089	5.94575	-0.0912439	0.0663415	0.729407	5.94572	-0.0310399	0.494405	0.772017	5.94576	-0.0760171	0.145771	0.412853	5.94578	-0.0517759	0.183507	0.999801	5.94583	-0.129204	0.0112448	0.0658958
Sar1a|ENSMUSG00000020088	6.96526	-0.0166059	0.713043	0.991393	6.96521	0.0153748	0.715796	0.893834	6.96527	-0.0292054	0.542617	0.796556	6.96528	0.0233632	0.512239	0.999801	6.96526	-0.00558356	0.901556	0.961646
Tysnd1|ENSMUSG00000020087	3.52684	0.106179	0.196687	0.896661	3.52685	-0.121201	0.114609	0.370001	3.52685	-0.0444767	0.610919	0.835816	3.52685	0.0278582	0.669118	0.999801	3.5269	-0.0162818	0.842729	0.937323
Aifm2|ENSMUSG00000020085	3.14992	0.0470972	0.603456	0.987824	3.15009	0.48713	8.88905e-08	7.55789e-06	3.14984	0.601494	1.57118e-08	1.51222e-06	3.14979	-0.0688375	0.33049	0.999801	3.14974	0.532342	4.70169e-08	2.79065e-06
H2afy2|ENSMUSG00000020086	4.09667	0.0381015	0.603858	0.987824	4.09664	0.140813	0.0391665	0.190346	4.09666	0.119689	0.124261	0.375982	4.09665	0.0545485	0.344662	0.999801	4.09657	0.173534	0.0176573	0.0917986
Col13a1|ENSMUSG00000058806	-0.844652	0.10274	0.691398	0.991393	-0.844624	0.0303448	0.902796	0.967025	-0.84469	-0.0272075	0.921307	0.975807	-0.84471	0.15598	0.451662	0.999801	-0.844784	0.14244	0.573327	0.794162
Gm5424|ENSMUSG00000046687	6.04009	-0.134011	0.0152471	0.481253	6.04017	0.116445	0.0254222	0.143438	6.04006	0.0872563	0.125768	0.378154	6.04006	-0.108631	0.0127795	0.668911	6.0401	-0.0221189	0.678587	0.858317
2010107G23Rik|ENSMUSG00000020083	3.88008	0.0203084	0.791299	0.994794	3.87984	-0.234861	0.000937168	0.0132986	3.88012	-0.211177	0.00982194	0.0692752	3.88015	-0.00879597	0.885414	0.999801	3.87994	-0.2192	0.00428112	0.0316392
Tspan15|ENSMUSG00000037031	4.37783	-0.0356476	0.607807	0.987824	4.37776	0.031388	0.628748	0.849472	4.37783	-0.0208901	0.774649	0.918111	4.37782	0.0105751	0.845061	0.999801	4.37779	-0.008212	0.905005	0.963212
Hk1|ENSMUSG00000037012	7.86832	0.0550172	0.21552	0.910553	7.86837	-0.0270257	0.518517	0.788132	7.8683	0.0460056	0.329312	0.640892	7.86831	-0.018441	0.601708	0.999801	7.86833	0.023785	0.591359	0.805345
2210417K05Rik|ENSMUSG00000085347	-1.22537	-0.063918	0.837751	0.994968	-1.22548	-0.590007	0.0590065	0.246758	-1.22537	-0.315664	0.346642	0.65563	-1.22536	-0.329786	0.206671	0.999801	-1.22542	-0.656141	0.04808	0.18803
Hkdc1|ENSMUSG00000020080	-1.04234	-0.112826	0.733164	0.991393	-1.04256	-0.221968	0.466406	0.752162	-1.0423	-0.246305	0.489839	0.764501	-1.04229	-0.110205	0.679811	0.999801	-1.04219	-0.329887	0.31142	0.585247
Supv3l1|ENSMUSG00000020079	4.39596	-0.00791524	0.908926	0.997217	4.39588	-0.0134826	0.834808	0.942331	4.39595	-0.0241555	0.741736	0.903031	4.39596	-0.000557089	0.991806	0.999801	4.39589	-0.0260687	0.704838	0.871258
4930507D05Rik|ENSMUSG00000097129	-0.732369	-0.0816998	0.745652	0.991393	-0.73254	0.0534877	0.821174	0.937308	-0.732386	0.12707	0.626868	0.845622	-0.73239	-0.161479	0.410749	0.999801	-0.732545	-0.0190116	0.938227	0.977274
Vps26a|ENSMUSG00000020078	5.63747	-0.00760555	0.883128	0.996828	5.63742	0.0582486	0.227398	0.53611	5.63748	0.0277104	0.614796	0.8382	5.63749	0.0174225	0.668968	0.999801	5.63747	0.0471922	0.359005	0.628581
Srgn|ENSMUSG00000020077	3.03718	-0.110317	0.243279	0.928029	3.03723	0.160485	0.0695221	0.274222	3.03715	0.00344953	0.972458	0.99085	3.03715	0.0471474	0.51771	0.999801	3.03714	0.0388347	0.679808	0.859078
2510003E04Rik|ENSMUSG00000036955	7.20456	0.0144955	0.746614	0.991393	7.20446	0.00865347	0.837055	0.942902	7.20457	0.00142056	0.976156	0.992552	7.20458	0.0175719	0.620364	0.999801	7.20456	0.0170934	0.702218	0.869911
Ddx21|ENSMUSG00000020075	5.18845	0.0842889	0.13747	0.854025	5.18844	0.0514372	0.332524	0.644839	5.18846	0.0938092	0.120503	0.370335	5.18845	0.0391791	0.383554	0.999801	5.18848	0.131658	0.0198912	0.10006
Ddx50|ENSMUSG00000020076	5.79417	-0.047978	0.342316	0.968395	5.79413	-0.00514828	0.912936	0.971252	5.79418	-0.0817551	0.135074	0.394558	5.79419	0.0254252	0.52454	0.999801	5.79424	-0.0567931	0.259605	0.530812
Stox1|ENSMUSG00000036923	1.97311	-0.0943171	0.518524	0.984789	1.97325	-0.0672767	0.620232	0.843315	1.9731	0.0570203	0.710125	0.889418	1.9731	-0.225824	0.054542	0.996196	1.97329	-0.17364	0.23692	0.504175
Ccar1|ENSMUSG00000020074	6.02277	0.0553159	0.254263	0.933282	6.02267	0.0057301	0.899289	0.965511	6.0228	0.019299	0.708456	0.889088	6.0228	0.0408112	0.288732	0.999801	6.0228	0.052927	0.271687	0.543183
Tet1|ENSMUSG00000047146	4.70669	0.0591964	0.359157	0.970269	4.70653	0.0555811	0.352772	0.6645	4.7067	0.0600223	0.382081	0.686315	4.70671	0.0469261	0.353021	0.999801	4.70657	0.106153	0.0977138	0.299552
Slc25a16|ENSMUSG00000071253	3.88365	0.00772196	0.920911	0.997501	3.88346	-0.0887018	0.213396	0.518624	3.88368	-0.0257394	0.755351	0.910033	3.8837	-0.0627357	0.300031	0.999801	3.88358	-0.0883363	0.253238	0.523567
Dna2|ENSMUSG00000036875	1.09894	-0.0944737	0.54954	0.984789	1.09899	0.0750326	0.609741	0.839059	1.09892	0.173056	0.295531	0.607807	1.09892	-0.197448	0.108269	0.999801	1.09891	-0.0212437	0.89051	0.956824
Rufy2|ENSMUSG00000020070	6.31406	-0.0172538	0.713802	0.991393	6.31407	-0.0103298	0.81586	0.934639	6.31407	-0.0469778	0.346089	0.655377	6.31408	0.0164943	0.657791	0.999801	6.3141	-0.0287174	0.538036	0.769897
Hnrnph3|ENSMUSG00000020069	5.88419	-0.01969	0.692549	0.991393	5.88418	-0.00266149	0.954345	0.986154	5.88418	0.0252799	0.631707	0.848246	5.88418	-0.0510671	0.191086	0.999801	5.8842	-0.027796	0.574385	0.79483
Pbld2|ENSMUSG00000020068	-0.70389	-0.0780159	0.757286	0.991393	-0.704008	-0.0745647	0.752788	0.909158	-0.703932	-0.0610975	0.819017	0.936925	-0.703931	-0.0932502	0.636798	0.999801	-0.704129	-0.153223	0.546506	0.775488
Pbld1|ENSMUSG00000020072	-1.68829	0.336885	0.446019	0.977718	-1.68835	0.494467	0.218741	0.524851	-1.68831	0.473007	0.312912	0.625752	-1.68832	0.337071	0.32658	0.999801	-1.68854	0.8243	0.0597851	0.217461
Mypn|ENSMUSG00000020067	0.689042	0.16434	0.353485	0.970269	0.689191	0.128743	0.435965	0.73241	0.689044	0.172926	0.352886	0.660148	0.689039	0.120763	0.379734	0.999801	0.689225	0.289519	0.102867	0.310288
Herc4|ENSMUSG00000020064	4.88646	-0.0114954	0.850771	0.995703	4.88644	0.124838	0.0295921	0.159025	4.88646	0.079904	0.218851	0.517223	4.88646	0.0304312	0.529936	0.999801	4.88647	0.109455	0.0711793	0.243457
Sirt1|ENSMUSG00000020063	4.6264	-0.00958615	0.8842	0.996828	4.62634	0.116854	0.0608172	0.251272	4.62641	0.116393	0.101548	0.335149	4.62641	-0.015022	0.769269	0.999801	4.62641	0.101185	0.125806	0.351501
Dnajc12|ENSMUSG00000036764	3.73409	0.0447739	0.570059	0.984789	3.73395	0.0510212	0.487288	0.766965	3.73411	0.0702707	0.39962	0.697676	3.73411	0.020948	0.738801	0.999801	3.73404	0.0892898	0.252428	0.522813
Ctnna3|ENSMUSG00000060843	1.78359	-0.0117649	0.928387	0.997501	1.78343	0.103481	0.398135	0.703495	1.78363	-0.0483167	0.725007	0.895765	1.78363	0.132623	0.197853	0.999801	1.78356	0.0918201	0.47623	0.72673
Gm10118|ENSMUSG00000062561	2.84466	0.0861081	0.372236	0.970798	2.84447	-0.184146	0.0413574	0.19819	2.84469	-0.233597	0.0234372	0.129883	2.84471	0.132711	0.0918705	0.999801	2.84464	-0.106825	0.265073	0.535978
Lrrtm3|ENSMUSG00000042846	6.60559	0.0138848	0.761553	0.991393	6.60542	-0.14996	0.0006465	0.00986113	6.60563	-0.175884	0.000441927	0.00651557	6.60566	0.0364332	0.318178	0.999801	6.60559	-0.143878	0.00178973	0.0159758
1110002J07Rik|ENSMUSG00000097134	-0.74352	0.567668	0.0599088	0.708831	-0.743761	-0.600793	0.0287633	0.155888	-0.743478	-0.274986	0.391148	0.691625	-0.743471	0.241933	0.307273	0.999801	-0.743677	-0.0293289	0.920547	0.969764
Jmjd1c|ENSMUSG00000037876	7.20689	0.00946438	0.832252	0.994968	7.20688	-0.0173856	0.681348	0.876041	7.2069	-0.0330684	0.484903	0.761444	7.20692	0.0231491	0.515038	0.999801	7.20696	-0.0111508	0.802119	0.918934
Reep3|ENSMUSG00000019873	6.05383	0.00372204	0.938763	0.997501	6.05384	0.0318957	0.484315	0.764603	6.05382	0.059496	0.249271	0.555901	6.05382	-0.0275513	0.470295	0.999801	6.05385	0.0339882	0.480083	0.729405
Nrbf2|ENSMUSG00000075000	2.94349	0.0262858	0.781076	0.992394	2.94345	-0.0155826	0.859932	0.952494	2.94352	0.0164591	0.870258	0.956937	2.94354	-0.00874322	0.907343	0.999801	2.94357	0.00602181	0.949035	0.980585
Egr2|ENSMUSG00000037868	4.36508	-0.538421	0.037074	0.612374	4.36566	0.284035	0.233419	0.544058	4.36513	-0.282205	0.287406	0.599444	4.36517	0.0228827	0.905462	0.999801	4.36605	-0.268526	0.276518	0.548099
Ado|ENSMUSG00000057134	6.5878	-0.0185253	0.688229	0.991393	6.58767	-0.0177851	0.681504	0.876176	6.58782	-0.0641175	0.189432	0.476837	6.58783	0.0229741	0.527887	0.999801	6.58782	-0.0420319	0.359961	0.62961
Zfp365|ENSMUSG00000037855	9.5713	0.00995478	0.82864	0.994968	9.57127	-0.195517	5.7722e-06	0.000223283	9.57132	-0.239863	2.0001e-06	8.08155e-05	9.57135	0.0502684	0.164562	0.999801	9.57142	-0.191165	3.24738e-05	0.000631522
Rtkn2|ENSMUSG00000037846	2.26401	-0.0771651	0.612863	0.987824	2.26395	0.197424	0.175408	0.467599	2.26402	-0.0168887	0.916177	0.973577	2.26401	0.133614	0.270027	0.999801	2.26395	0.127203	0.405638	0.671101
Arid5b|ENSMUSG00000019947	4.09702	0.449752	0.00325179	0.230369	4.09702	-0.120261	0.380084	0.688979	4.09706	0.29515	0.0575707	0.235844	4.09707	0.0423915	0.715478	0.999801	4.09714	0.332057	0.0258954	0.121143
1700040L02Rik|ENSMUSG00000019945	1.77746	0.0667046	0.616513	0.987917	1.77733	0.279936	0.0235842	0.136337	1.77745	0.422467	0.00291641	0.0281646	1.77744	-0.082553	0.420527	0.999801	1.77724	0.34321	0.00874846	0.0543804
Tmem26|ENSMUSG00000060044	-2.33131	-0.304203	0.526915	0.984789	NA	NA	NA	NA	-2.33131	0.152158	0.770221	0.916261	NA	NA	NA	NA	-2.33138	-0.0653747	0.892161	0.957567
Rhobtb1|ENSMUSG00000019944	1.44141	0.195631	0.176711	0.878634	1.44147	-0.127615	0.332459	0.644839	1.44141	0.0045743	0.97657	0.992627	1.44141	0.0588446	0.605492	0.999801	1.44146	0.0582885	0.683663	0.860824
A930033H14Rik|ENSMUSG00000090622	0.943158	0.0419419	0.877241	0.996828	0.943109	0.248983	0.325255	0.639087	0.943171	-0.0898762	0.752743	0.908968	0.943162	0.37951	0.0802203	0.999801	0.943088	0.284701	0.288847	0.561231
Cdk1|ENSMUSG00000019942	-0.906658	-0.250781	0.502037	0.982515	-0.906977	-0.193031	0.56232	0.811951	-0.906628	-0.0583659	0.885608	0.961633	-0.90663	-0.405888	0.196491	0.999801	-0.906715	-0.43766	0.234322	0.501189
Ank3|ENSMUSG00000069601	8.88814	0.00613999	0.891563	0.997217	8.88808	-0.175557	3.44269e-05	0.000963	8.88817	-0.183902	0.000122704	0.00236729	8.8882	0.0116989	0.744397	0.999801	8.88823	-0.174462	0.000108673	0.00168419
Ccdc6|ENSMUSG00000048701	6.02125	0.0590277	0.310571	0.951362	6.0214	0.12552	0.029924	0.160107	6.02126	0.183206	0.00554114	0.0453121	6.02126	0.00169892	0.970939	0.999801	6.02141	0.182199	0.0035648	0.0271912
Slc16a9|ENSMUSG00000037762	0.890462	-0.0422085	0.845278	0.994968	0.890649	0.00892238	0.965024	0.990427	0.890436	-0.0335572	0.883767	0.960948	0.890432	0.0073286	0.96653	0.999801	0.890515	-0.0334563	0.876939	0.951831
Fam13c|ENSMUSG00000043259	5.96137	-0.0401029	0.438183	0.977718	5.9614	0.0715669	0.145454	0.422276	5.96137	0.0459275	0.402577	0.700443	5.96137	-0.0172934	0.669376	0.999801	5.9614	0.0285582	0.573002	0.794054
Phyhipl|ENSMUSG00000037747	7.21325	0.0601164	0.181028	0.88398	7.21323	0.0729121	0.082471	0.303353	7.21324	0.131809	0.005845	0.0472119	7.21324	-0.00238817	0.946244	0.999801	7.21327	0.126052	0.00509775	0.0362732
Bicc1|ENSMUSG00000014329	2.87858	-0.0633378	0.516073	0.984789	2.87858	0.210024	0.0201116	0.122793	2.87855	0.244391	0.0168094	0.102676	2.87852	-0.106738	0.153836	0.999801	2.87851	0.141491	0.143012	0.378282
Tfam|ENSMUSG00000003923	5.17812	-0.0545181	0.338787	0.967444	5.17803	-0.00339212	0.948922	0.98428	5.17813	-0.0453825	0.453326	0.739692	5.17815	-0.0166607	0.71185	0.999801	5.17811	-0.0636536	0.260999	0.532084
Ube2d1|ENSMUSG00000019927	5.80147	-0.00631536	0.900445	0.997217	5.80139	0.0738698	0.119275	0.377892	5.80148	0.0424072	0.426354	0.720203	5.80148	0.0213772	0.589464	0.999801	5.80145	0.0623602	0.212602	0.474376
Cisd1|ENSMUSG00000037710	5.9266	-0.0200428	0.685156	0.991393	5.92654	-0.00809897	0.859938	0.952494	5.92661	-0.0390584	0.456776	0.742526	5.92662	0.00548205	0.888402	0.999801	5.92662	-0.0339011	0.489419	0.737003
Ipmk|ENSMUSG00000060733	5.23331	-0.0168425	0.765248	0.991393	5.23333	-0.0282846	0.592064	0.830248	5.23331	0.0269722	0.650641	0.858832	5.23332	-0.0759594	0.0854305	0.999801	5.23342	-0.0508797	0.363062	0.63296
Gm9923|ENSMUSG00000053830	2.0654	0.121016	0.315755	0.952987	2.06526	-0.0532297	0.630847	0.849998	2.06542	0.118538	0.353116	0.660178	2.06543	-0.0580683	0.541449	0.999801	2.06536	0.0575241	0.626686	0.827162
Zwint|ENSMUSG00000019923	8.97466	0.00464035	0.917945	0.997501	8.97458	-0.0771616	0.0696064	0.274258	8.97468	-0.0740025	0.122889	0.373729	8.9747	-0.00252386	0.94416	0.999801	8.97469	-0.0758247	0.0918933	0.288383
Pcdh15|ENSMUSG00000052613	3.55395	0.149492	0.077249	0.756616	3.55398	-0.0551322	0.482765	0.763407	3.55396	0.0144154	0.86835	0.956389	3.55397	0.0805756	0.224066	0.999801	3.55402	0.0938014	0.25589	0.526572
Gm5778|ENSMUSG00000091825	-0.975973	0.189705	0.465972	0.978767	-0.975904	0.0502485	0.837419	0.943055	-0.975979	0.319616	0.253009	0.56065	-0.975978	-0.0804354	0.701689	0.999801	-0.975951	0.239848	0.349117	0.619452
Gm6419|ENSMUSG00000072407	2.47684	-0.030838	0.774828	0.99203	2.47678	-0.0232114	0.817206	0.935498	2.47685	-0.00659975	0.954247	0.985066	2.47687	-0.0500649	0.5565	0.999801	2.47689	-0.061921	0.564757	0.788342
Gnaz|ENSMUSG00000040009	5.63705	0.0371795	0.470704	0.978767	5.63707	-0.0528726	0.272115	0.587765	5.63705	0.00429527	0.937857	0.981775	5.63705	-0.0220522	0.58908	0.999801	5.63709	-0.0212874	0.679319	0.858833
Rab36|ENSMUSG00000020175	5.08474	-0.0488816	0.401259	0.975901	5.08471	-0.206897	0.000141646	0.00300343	5.08476	-0.247703	5.96927e-05	0.0012896	5.08478	-0.00945756	0.836285	0.999801	5.08479	-0.259204	1.1491e-05	0.000269817
Bcr|ENSMUSG00000009681	8.90904	-0.123774	0.00620789	0.30456	8.90911	-0.188794	8.10411e-06	0.000294879	8.90905	-0.264288	8.49883e-08	5.84747e-06	8.90908	-0.05008	0.16205	0.999801	8.9092	-0.318454	8.16247e-10	9.68954e-08
Specc1l|ENSMUSG00000033444	6.38054	0.0240992	0.605841	0.987824	6.38052	-0.0705478	0.106003	0.353364	6.38054	-0.068894	0.164343	0.441413	6.38055	0.0187769	0.612683	0.999801	6.38057	-0.0502747	0.278299	0.549144
Adora2a|ENSMUSG00000020178	8.59612	-0.318462	0.000659396	0.111895	8.5963	0.0283556	0.718756	0.894992	8.59607	-0.127742	0.162151	0.438435	8.59607	-0.168396	0.0156762	0.745899	8.59623	-0.299357	0.00127195	0.0122563
Upb1|ENSMUSG00000033427	2.90014	-0.374951	0.00720022	0.323897	2.90072	0.796057	4.56993e-07	2.76368e-05	2.9	0.714122	7.95464e-06	0.00024778	2.89994	-0.295233	0.00445567	0.465019	2.90024	0.403679	0.00367233	0.0278625
Gucd1|ENSMUSG00000033416	4.03588	-0.0103913	0.889394	0.997217	4.0359	0.0120437	0.861581	0.952693	4.03586	0.0347455	0.660474	0.86346	4.03586	-0.0379217	0.515738	0.999801	4.03586	-0.00392825	0.957879	0.984427
Snrpd3|ENSMUSG00000020180	4.89774	0.0105415	0.86266	0.996047	4.89763	-0.0262208	0.645542	0.858276	4.89776	-0.0508808	0.43182	0.725217	4.89777	0.0300752	0.535416	0.999801	4.89774	-0.0190006	0.753965	0.894572
Fam211b|ENSMUSG00000046807	4.30772	0.0327789	0.639451	0.990949	4.30779	-0.0754901	0.253025	0.567027	4.3077	-0.0455365	0.538074	0.794884	4.3077	0.00148846	0.978633	0.999801	4.30779	-0.0449922	0.517705	0.756833
Ggt1|ENSMUSG00000006345	1.33434	-0.0173714	0.913761	0.997217	1.33441	-0.163402	0.28311	0.598526	1.33433	-0.228467	0.17708	0.459739	1.33434	0.045439	0.717495	0.999801	1.33444	-0.189474	0.239715	0.507704
Ggt5|ENSMUSG00000006344	1.28398	0.136955	0.350231	0.970269	1.28415	-0.253085	0.0700643	0.275398	1.28396	-0.194422	0.213343	0.509976	1.28397	0.0863087	0.46942	0.999801	1.28414	-0.120973	0.40747	0.672587
Susd2|ENSMUSG00000006342	2.45613	-0.0624083	0.617042	0.987917	2.45652	0.459631	0.000407288	0.00690608	2.45604	0.431702	0.00256629	0.0255169	2.456	-0.0360994	0.709153	0.999801	2.45617	0.39507	0.00299599	0.0236661
Cabin1|ENSMUSG00000020196	6.41409	-0.0119654	0.796905	0.994794	6.41413	-0.0181471	0.679227	0.874885	6.41409	-0.011403	0.816945	0.935759	6.4141	-0.02071	0.57469	0.999801	6.41411	-0.0348826	0.449396	0.705888
Ddt|ENSMUSG00000001666	4.47275	0.0260267	0.699165	0.991393	4.4727	-0.0157028	0.804013	0.930082	4.47275	-0.0415862	0.55983	0.80752	4.47275	0.0507419	0.343818	0.999801	4.47276	0.00436058	0.947991	0.980158
Gm20441|ENSMUSG00000092360	2.98569	-0.00755555	0.935769	0.997501	2.98563	-0.079054	0.365917	0.677275	2.98569	-0.0829551	0.402116	0.699964	2.9857	-0.00457598	0.950937	0.999801	2.9857	-0.0927539	0.318309	0.590643
Gstt3|ENSMUSG00000001665	2.10829	-0.0479484	0.687623	0.991393	2.10821	-0.103676	0.3475	0.660248	2.10828	-0.104035	0.40941	0.705715	2.1083	-0.0465992	0.622294	0.999801	2.1083	-0.162746	0.168214	0.415986
Gstt1|ENSMUSG00000001663	2.42382	0.132747	0.221637	0.912646	2.42382	-0.130352	0.196363	0.496772	2.42381	0.0999972	0.383621	0.687397	2.4238	-0.0974045	0.259158	0.999801	2.42387	-0.00247479	0.981655	0.993923
Gstt2|ENSMUSG00000033318	0.544953	0.170252	0.364845	0.970269	0.544861	0.266552	0.124024	0.385751	0.544927	0.20122	0.313212	0.626058	0.544919	0.231778	0.120707	0.999801	0.544726	0.432735	0.0199946	0.100467
Mif|ENSMUSG00000033307	5.0532	0.04848	0.410283	0.97686	5.05314	-0.0236713	0.667889	0.869805	5.0532	-0.0221186	0.723601	0.895577	5.05321	0.0435244	0.350767	0.999801	5.0532	0.0171641	0.769562	0.903123
Derl3|ENSMUSG00000009092	0.204918	-0.258966	0.198644	0.896759	0.204813	0.196009	0.289312	0.603971	0.204921	0.00467926	0.982145	0.994223	0.204937	-0.0708166	0.653676	0.999801	0.20489	-0.0745418	0.706191	0.871642
Smarcb1|ENSMUSG00000000902	6.05821	0.014654	0.76171	0.991393	6.05814	-0.078973	0.0810038	0.299901	6.05822	-0.068946	0.178426	0.461265	6.05823	-1.23079e-05	0.999743	0.999801	6.05821	-0.0697967	0.146227	0.383626
Mmp11|ENSMUSG00000000901	0.787262	0.0606125	0.723637	0.991393	0.78703	-0.0417633	0.794157	0.926614	0.787279	-0.16808	0.357474	0.663475	0.787278	0.183735	0.177796	0.999801	0.787039	0.0125178	0.94133	0.97842
Chchd10|ENSMUSG00000049422	6.95002	-0.0274265	0.543184	0.984789	6.94993	-0.213002	8.90983e-06	0.00031947	6.95004	-0.250267	4.37189e-06	0.000150703	6.95006	0.0079021	0.826052	0.999801	6.95007	-0.247386	2.30948e-06	7.13891e-05
Gm867|ENSMUSG00000050157	-0.673257	0.360111	0.214459	0.908232	-0.673833	-0.409051	0.112922	0.36693	-0.67316	-0.0381679	0.904806	0.970408	-0.673144	-0.022541	0.923345	0.999801	-0.673369	-0.063821	0.82602	0.929125
Zfp280b|ENSMUSG00000049764	4.94912	0.0250686	0.678451	0.991393	4.94908	0.00459218	0.93489	0.979446	4.94913	0.0732281	0.256462	0.564454	4.94914	-0.0470775	0.32402	0.999801	4.94912	0.0208789	0.730258	0.882473
Slc5a4b|ENSMUSG00000020226	-1.34649	-0.899171	0.0287599	0.563902	-1.34614	1.28504	0.00147387	0.018632	-1.3466	0.815027	0.0355853	0.17225	-1.34664	-0.438215	0.115835	0.999801	-1.34649	0.381146	0.277687	0.548787
Prmt2|ENSMUSG00000020230	5.45918	0.0739367	0.163994	0.873338	5.45923	0.0970819	0.0515534	0.227676	5.45915	0.204529	0.000277754	0.0045312	5.45914	-0.0347755	0.405794	0.999801	5.45914	0.168266	0.00144432	0.0135269
S100b|ENSMUSG00000033208	7.37349	0.00445287	0.951401	0.999207	7.37344	0.141834	0.0447618	0.208568	7.37348	0.0870804	0.259057	0.56805	7.37347	0.0561748	0.330459	0.999801	7.37353	0.145862	0.0485042	0.189267
Dip2a|ENSMUSG00000020231	6.5536	0.0272099	0.599066	0.987824	6.55364	0.0715286	0.148927	0.42659	6.55359	0.136562	0.0180138	0.107551	6.55357	-0.0399403	0.324041	0.999801	6.55366	0.0923763	0.0771678	0.257631
Pcnt|ENSMUSG00000001151	5.10765	0.123437	0.032672	0.586352	5.10769	-0.0310556	0.568537	0.816508	5.10764	0.0795178	0.194275	0.483768	5.10764	0.0113821	0.804181	0.999801	5.10764	0.0902315	0.116054	0.334484
Ybey|ENSMUSG00000033126	2.46668	0.0046706	0.965211	0.999487	2.46659	0.0404682	0.684294	0.878153	2.46669	0.004645	0.967593	0.989559	2.46669	0.0355981	0.677463	0.999801	2.46662	0.0418938	0.696526	0.867713
Mcm3ap|ENSMUSG00000001150	6.24991	-0.0262915	0.578768	0.985725	6.24982	-0.150682	0.000664721	0.0100331	6.24994	-0.176432	0.000450293	0.00662172	6.24997	-0.00347457	0.926419	0.999801	6.24997	-0.18315	9.489e-05	0.00150888
Lss|ENSMUSG00000033105	4.22196	0.162752	0.0215625	0.521742	4.22203	-0.132217	0.0474769	0.216176	4.22195	0.0847712	0.259797	0.568855	4.22195	-0.0555557	0.325414	0.999801	4.22197	0.0263431	0.709391	0.872545
Ftcd|ENSMUSG00000001155	-1.30078	0.448651	0.230383	0.920834	-1.30064	1.0197	0.00216386	0.0249592	-1.30088	1.63053	7.71522e-05	0.00159827	-1.30095	-0.16582	0.476246	0.999801	-1.30112	1.46163	0.000214247	0.00294637
Col6a2|ENSMUSG00000020241	4.50415	0.139862	0.12704	0.846649	4.5045	0.618864	3.82756e-08	3.75648e-06	4.50403	0.8144	9.43016e-10	1.52413e-07	4.50395	-0.0559865	0.419043	0.999801	4.50389	0.762405	1.21313e-09	1.39176e-07
Col6a1|ENSMUSG00000001119	6.3202	0.203122	0.143482	0.856329	6.32033	0.00414583	0.974599	0.993259	6.32017	0.346698	0.0205133	0.117916	6.32015	-0.139973	0.199183	0.999801	6.32005	0.211746	0.123177	0.346777
Pcbp3|ENSMUSG00000001120	5.30748	-0.0296073	0.591157	0.987824	5.30754	0.0110549	0.829553	0.940471	5.30747	0.00013067	0.998217	0.99909	5.30748	-0.021058	0.629016	0.999801	5.30749	-0.0227827	0.6776	0.857715
Slc19a1|ENSMUSG00000001436	3.79197	0.0544026	0.488755	0.980691	3.79189	-0.011439	0.874517	0.957289	3.79196	0.0634308	0.448123	0.736568	3.79195	-0.0249033	0.685418	0.999801	3.7918	0.0394509	0.615124	0.820005
Col18a1|ENSMUSG00000001435	1.44555	0.112437	0.441179	0.977718	1.44556	0.0205428	0.878559	0.958596	1.44552	-0.0126155	0.934589	0.980609	1.44551	0.147664	0.202272	0.999801	1.44545	0.131085	0.36335	0.633205
Gm10941|ENSMUSG00000078444	-2.31244	0.696838	0.114799	0.836384	-2.31278	-0.278525	0.44796	0.740492	NA	NA	NA	NA	NA	NA	NA	NA	NA	NA	NA	NA
Pofut2|ENSMUSG00000020260	4.35821	0.0214709	0.75648	0.991393	4.35824	0.0850054	0.191414	0.490285	4.35819	0.112948	0.123233	0.37422	4.35818	-0.00667127	0.903185	0.999801	4.35825	0.100118	0.145176	0.381791
Adarb1|ENSMUSG00000020262	7.44123	0.0514811	0.248102	0.930311	7.44118	-0.221986	1.12292e-07	9.14034e-06	7.44126	-0.19449	3.78851e-05	0.000901455	7.44129	0.0231133	0.514852	0.999801	7.44133	-0.175644	7.49011e-05	0.00124186
Fam207a|ENSMUSG00000032977	5.03022	0.0144932	0.805799	0.994794	5.03022	-0.0387708	0.481752	0.762941	5.03023	-0.0751726	0.230047	0.53227	5.03024	0.0491365	0.295517	0.999801	5.03031	-0.029053	0.620232	0.823156
Itgb2|ENSMUSG00000000290	3.0335	-0.0356922	0.716163	0.991393	3.0336	-0.0503785	0.582854	0.825874	3.03347	-0.0087508	0.933241	0.979799	3.03346	-0.0775177	0.324725	0.999801	3.03349	-0.086486	0.382426	0.651424
Pttg1ip|ENSMUSG00000009291	4.63755	0.0476889	0.465337	0.978767	4.63756	-0.0666675	0.2746	0.589541	4.63754	0.0213796	0.756498	0.910274	4.63754	-0.0458536	0.36985	0.999801	4.63751	-0.0215136	0.741053	0.888371
Sumo3|ENSMUSG00000020265	7.41637	-0.0203916	0.648795	0.991393	7.41625	-0.104223	0.012762	0.0896791	7.41639	-0.0803849	0.0898526	0.312179	7.41641	-0.0508883	0.150624	0.999801	7.41635	-0.126258	0.0045686	0.0332998
Ube2g2|ENSMUSG00000009293	3.6933	-0.100078	0.205317	0.900656	3.69317	-0.190491	0.00951158	0.0729041	3.69335	-0.246464	0.0034133	0.0316946	3.69338	-0.0515875	0.417857	0.999801	3.69338	-0.293565	0.000185046	0.00260344
Tspear|ENSMUSG00000069581	1.23971	-0.0401332	0.820745	0.994968	1.23931	-1.14452	1.70592e-07	1.26836e-05	1.23988	-1.09001	2.79315e-06	0.000104939	1.24001	-0.0987462	0.518887	0.999801	1.24015	-1.18365	2.77832e-07	1.21776e-05
Lrrc3|ENSMUSG00000051652	4.41603	-0.0776577	0.28817	0.943213	4.41626	0.443509	2.28254e-07	1.61328e-05	4.41595	0.408567	7.94378e-06	0.00024778	4.41591	-0.0488365	0.385447	0.999801	4.41597	0.356797	2.53261e-05	0.000520341
Trpm2|ENSMUSG00000009292	5.35959	0.110601	0.0419011	0.631654	5.35973	0.0581011	0.251968	0.56593	5.35957	0.163677	0.00459213	0.0395736	5.35956	0.00389345	0.92788	0.999801	5.35962	0.165281	0.00216193	0.0183952
1810043G02Rik|ENSMUSG00000020284	4.60921	0.111407	0.0864199	0.784508	4.60916	0.0617241	0.313115	0.626558	4.60918	0.147721	0.0329902	0.164061	4.60917	0.0226666	0.664427	0.999801	4.60903	0.171999	0.00767265	0.0491775
Pfkl|ENSMUSG00000020277	6.62162	0.0630139	0.169398	0.87426	6.62155	-0.0632318	0.140596	0.414192	6.62163	0.0184199	0.705781	0.88751	6.62164	-0.0212241	0.558389	0.999801	6.6216	-0.00556807	0.90364	0.962539
Icosl|ENSMUSG00000000732	2.34865	0.0382442	0.750305	0.991393	2.34859	-0.250067	0.0319136	0.166956	2.34867	-0.0851325	0.505222	0.775148	2.34868	-0.128534	0.198677	0.999801	2.34867	-0.220319	0.0727873	0.247254
D10Jhu81e|ENSMUSG00000053329	5.57193	0.0231328	0.65797	0.991393	5.57184	-0.0430274	0.377729	0.686434	5.57194	-0.0526213	0.342271	0.651532	5.57195	0.0305606	0.460463	0.999801	5.57194	-0.0260151	0.616551	0.820905
Pwp2|ENSMUSG00000032834	4.94141	-0.0537782	0.370848	0.970798	4.9414	-0.029901	0.596621	0.832053	4.94142	-0.0429834	0.500829	0.772295	4.94143	-0.0446553	0.350364	0.999801	4.94144	-0.0860982	0.149787	0.389169
Trappc10|ENSMUSG00000000374	6.80115	-0.00343126	0.93993	0.997588	6.80113	-0.0726617	0.0875127	0.314639	6.80115	-0.0497466	0.302641	0.615434	6.80117	-0.0296228	0.409208	0.999801	6.8012	-0.0818754	0.0710205	0.243145
Agpat3|ENSMUSG00000001211	8.10039	0.022927	0.608196	0.987824	8.10043	-0.0134454	0.748211	0.907002	8.10038	-0.00605044	0.898449	0.968055	8.10038	0.0137181	0.698127	0.999801	8.10044	0.00413685	0.926177	0.972378
Gm10146|ENSMUSG00000064317	3.21549	-0.0407539	0.642382	0.990949	3.21542	-0.0340271	0.680141	0.875432	3.21548	-0.0448171	0.630117	0.846949	3.21548	-0.0313852	0.654851	0.999801	3.21543	-0.0792436	0.363098	0.63296
Rrp1|ENSMUSG00000061032	8.11355	-0.000707232	0.987363	0.999487	8.1135	-0.081178	0.0514523	0.227563	8.11356	-0.11953	0.0115056	0.0781954	8.11358	0.0342923	0.332104	0.999801	8.11357	-0.0861845	0.0527335	0.200273
Cstb|ENSMUSG00000005054	4.03345	-0.0451498	0.543327	0.984789	4.03341	-0.0305664	0.659996	0.865343	4.03347	-0.0752229	0.339521	0.649251	4.03348	-0.00468888	0.936225	0.999801	4.03352	-0.0782873	0.290715	0.563365
Pdxk|ENSMUSG00000032788	8.05949	-0.0284966	0.523385	0.984789	8.05947	-0.210616	6.35711e-07	3.65479e-05	8.05952	-0.207442	1.08441e-05	0.000317033	8.05955	-0.0334889	0.342418	0.999801	8.0596	-0.246331	1.07618e-07	5.73091e-06
Ilvbl|ENSMUSG00000032763	4.30745	0.0375435	0.593098	0.987824	4.30739	0.0925396	0.157807	0.439464	4.30744	0.074582	0.318211	0.62995	4.30742	0.0529059	0.340329	0.999801	4.30739	0.126774	0.0695502	0.239938
Syde1|ENSMUSG00000032714	2.97304	-0.0228138	0.806534	0.994794	2.97307	0.00905315	0.918698	0.973323	2.97303	-0.0979975	0.321872	0.633768	2.97302	0.086105	0.248081	0.999801	2.97305	-0.0166481	0.857643	0.943203
Slc1a6|ENSMUSG00000005357	1.41895	0.0861637	0.546229	0.984789	1.41915	0.360276	0.00853382	0.067699	1.41889	0.437828	0.00479465	0.0408463	1.41885	0.0131287	0.907652	0.999801	1.41887	0.447279	0.00214913	0.018332
2610008E11Rik|ENSMUSG00000060301	5.52497	0.129247	0.0202624	0.509953	5.52487	0.0515233	0.296339	0.611292	5.52497	0.156523	0.00857644	0.0624974	5.52496	0.0188985	0.651482	0.999801	5.52487	0.178912	0.00162043	0.0147507
Ppap2c|ENSMUSG00000052151	2.24423	-0.0901532	0.429528	0.977718	2.24422	0.285018	0.0108712	0.0802717	2.24423	0.134031	0.267285	0.577226	2.24421	0.0597054	0.505706	0.999801	2.24425	0.192903	0.0892624	0.282582
Mier2|ENSMUSG00000091854	3.48911	0.0571841	0.493162	0.982104	3.48922	-0.0111182	0.885716	0.960456	3.48908	0.100556	0.25751	0.565664	3.48907	-0.0556349	0.397253	0.999801	3.48911	0.0382485	0.644015	0.837265
Mier2|ENSMUSG00000042570	4.81531	-0.00580496	0.925626	0.997501	4.8154	0.0298338	0.607921	0.837763	4.81529	0.0552032	0.406364	0.703234	4.81529	-0.0317443	0.51952	0.999801	4.8153	0.0176659	0.775811	0.906473
Theg|ENSMUSG00000020317	-0.439313	-0.314801	0.249242	0.930311	-0.439258	-0.642234	0.0188527	0.11753	-0.439297	-0.502278	0.0860677	0.304023	-0.439255	-0.450586	0.0450577	0.970736	-0.439131	-0.959279	0.00133656	0.012778
C2cd4c|ENSMUSG00000045912	2.44099	-0.183579	0.137325	0.854025	2.44128	0.342029	0.00466813	0.0439798	2.44092	0.472216	0.000749675	0.00974463	2.4409	-0.320757	0.00147652	0.312002	2.44105	0.15408	0.204458	0.464637
Shc2|ENSMUSG00000020312	5.76625	-0.0407823	0.423521	0.977718	5.76641	0.139392	0.00358312	0.0361363	5.76619	0.181116	0.000771512	0.009938	5.76617	-0.0846962	0.032999	0.914122	5.7662	0.0922519	0.0680969	0.236457
Tpgs1|ENSMUSG00000020308	4.12909	-0.00619146	0.942893	0.99807	4.1291	-0.256946	0.00329066	0.0340465	4.12908	-0.219944	0.0219724	0.123992	4.1291	-0.0475049	0.495668	0.999801	4.12913	-0.269561	0.0037601	0.0284026
Cdc34|ENSMUSG00000020307	4.76603	-0.0967527	0.126819	0.846649	4.76601	-0.0497636	0.39777	0.702998	4.76604	-0.148597	0.028364	0.148193	4.76606	-0.000870442	0.986113	0.999801	4.76613	-0.154214	0.0150465	0.0818022
Gzmm|ENSMUSG00000054206	0.748831	-0.120688	0.489426	0.980691	0.748803	0.111408	0.492335	0.771237	0.748824	-0.213148	0.24391	0.548741	0.748818	0.198534	0.147863	0.999801	0.748804	-0.0185656	0.914255	0.968346
Bsg|ENSMUSG00000023175	8.19223	0.0335369	0.45575	0.978124	8.19222	-0.0538272	0.198149	0.499592	8.19222	-0.0413234	0.386701	0.688663	8.19223	0.0191248	0.58903	0.999801	8.19226	-0.0278341	0.53575	0.768588
Hcn2|ENSMUSG00000020331	7.07906	-0.0631398	0.160833	0.871395	7.0791	-0.135675	0.00137574	0.0178054	7.07905	-0.137514	0.00373721	0.0340925	7.07907	-0.0621988	0.0793967	0.999801	7.07915	-0.204206	5.07072e-06	0.000136502
Polrmt|ENSMUSG00000020329	4.59452	0.0282513	0.665145	0.991393	4.59455	-0.0386983	0.527851	0.792609	4.59451	-0.088396	0.20144	0.493999	4.59452	0.0778002	0.134588	0.999801	4.59455	-0.0140028	0.828741	0.930353
Fgf22|ENSMUSG00000020327	-1.68284	-0.547159	0.169458	0.87426	-1.68293	0.492916	0.17554	0.467644	-1.68287	0.0235409	0.954155	0.985045	-1.68288	-0.0857169	0.768486	0.999801	-1.6832	-0.0459588	0.904562	0.96298
Rnf126|ENSMUSG00000035890	5.00148	0.0226689	0.703949	0.991393	5.00151	-0.167161	0.00319523	0.0332769	5.00147	-0.131239	0.0383242	0.180197	5.00148	-0.0143957	0.760027	0.999801	5.00152	-0.153045	0.0100961	0.060726
Fstl3|ENSMUSG00000020325	1.20818	-0.135276	0.444028	0.977718	1.20809	-0.2916	0.0918962	0.323833	1.20815	-0.367154	0.0524215	0.221926	1.20815	-0.061846	0.659209	0.999801	1.20805	-0.429686	0.0180041	0.0930922
Prss57|ENSMUSG00000020323	-1.16854	0.415698	0.256713	0.93516	-1.16846	0.175747	0.602008	0.834772	-1.16858	0.48334	0.202124	0.494787	-1.1686	0.116983	0.66818	0.999801	-1.16863	0.603754	0.0961317	0.29661
Palm|ENSMUSG00000035863	7.74926	0.0588811	0.188229	0.893941	7.74941	0.0277931	0.508936	0.781281	7.74922	0.0788563	0.0971057	0.327483	7.74921	0.00807137	0.818473	0.999801	7.74927	0.082133	0.0673345	0.234757
Misp|ENSMUSG00000035852	-0.685828	-0.397183	0.126439	0.846649	-0.685447	0.815488	0.00247775	0.0273492	-0.685875	0.589295	0.0295331	0.151803	-0.685909	-0.167674	0.390727	0.999801	-0.685647	0.412877	0.101833	0.307932
Ptbp1|ENSMUSG00000006498	5.06621	-0.000803703	0.989187	0.999487	5.0662	-0.00101921	0.985358	0.996146	5.0662	-0.00675358	0.913937	0.972638	5.06621	0.0013345	0.976876	0.999801	5.06622	-0.00868437	0.882619	0.953917
E130317F20Rik|ENSMUSG00000091994	2.09984	-0.0998264	0.40227	0.97622	2.09968	-0.302839	0.00585725	0.0516418	2.09986	-0.317214	0.0122028	0.0814726	2.09987	-0.0900519	0.339431	0.999801	2.09975	-0.406088	0.000685274	0.00740929
BC005764|ENSMUSG00000035835	5.83172	-0.0100856	0.839183	0.994968	5.83167	-0.166867	0.000318169	0.00566274	5.83173	-0.214021	5.04254e-05	0.00113223	5.83176	0.0348162	0.381007	0.999801	5.83173	-0.179627	0.000272011	0.00354132
Prtn3|ENSMUSG00000057729	0.120418	0.234274	0.445265	0.977718	0.120479	0.31039	0.273317	0.588765	0.120355	0.495538	0.126517	0.379462	0.120318	0.0450804	0.842169	0.999801	0.120314	0.541206	0.0819423	0.267364
Med16|ENSMUSG00000013833	5.70437	0.0631099	0.21664	0.910553	5.70434	-0.211388	9.01707e-06	0.000322642	5.70438	-0.184239	0.000673882	0.00905486	5.7044	0.03478	0.388876	0.999801	5.70437	-0.152232	0.0028068	0.0225468
R3hdm4|ENSMUSG00000035781	7.67381	0.0139416	0.75533	0.991393	7.6738	-0.0941466	0.0245453	0.140195	7.6738	-0.100135	0.0346127	0.169521	7.67381	0.0175006	0.620276	0.999801	7.67381	-0.0841664	0.0591024	0.215737
Kiss1r|ENSMUSG00000035773	1.53737	0.227341	0.101658	0.813509	1.53738	-0.218043	0.0933667	0.326327	1.53738	-0.135544	0.361763	0.667193	1.53738	0.145208	0.191924	0.999801	1.53729	0.00232768	0.98662	0.995536
Arid3a|ENSMUSG00000019564	1.74691	-0.0506499	0.697417	0.991393	1.74678	-0.095874	0.431477	0.729123	1.7469	-0.0302154	0.827306	0.940505	1.74692	-0.119594	0.256134	0.999801	1.74678	-0.150545	0.239828	0.507756
Wdr18|ENSMUSG00000035754	5.57592	-0.0356565	0.493653	0.982104	5.57585	-0.211622	1.2475e-05	0.000424275	5.57594	-0.211999	0.000132762	0.00253566	5.57596	-0.0379175	0.359674	0.999801	5.57601	-0.25237	1.10619e-06	3.79702e-05
Grin3b|ENSMUSG00000035745	-1.70595	-0.368159	0.321717	0.95794	-1.70595	-0.953984	0.0173275	0.111004	-1.70591	-1.3814	0.00173837	0.0189808	NA	NA	NA	NA	-1.70574	-1.31563	0.00142614	0.0134114
Tmem259|ENSMUSG00000013858	6.19071	0.00915285	0.847904	0.995468	6.19067	-0.133131	0.00281966	0.0302503	6.19071	-0.0961747	0.0573384	0.235343	6.19072	-0.0297653	0.430129	0.999801	6.19072	-0.131468	0.00555877	0.0386964
Cnn2|ENSMUSG00000004665	1.51908	0.103091	0.47534	0.978767	1.51911	0.039813	0.763999	0.91293	1.51905	0.139791	0.361311	0.666592	1.51903	0.000498004	0.996366	0.999801	1.51904	0.136078	0.349515	0.619749
Abca7|ENSMUSG00000035722	3.75089	0.0762749	0.332367	0.964611	3.75095	0.0525581	0.479424	0.761641	3.75087	-0.0305981	0.711547	0.89007	3.75086	0.162094	0.00941083	0.60517	3.75088	0.127521	0.100566	0.305508
Hmha1|ENSMUSG00000035697	3.14987	0.0179497	0.841441	0.994968	3.15007	-0.100746	0.228133	0.537142	3.14983	-0.0245687	0.796703	0.926995	3.14982	-0.056748	0.422175	0.999801	3.14993	-0.0864134	0.333206	0.60523
Polr2e|ENSMUSG00000004667	5.11625	-0.0187453	0.746066	0.991393	5.11626	-0.0525915	0.332293	0.644727	5.11625	-0.0353273	0.564808	0.809326	5.11625	-0.0388462	0.395773	0.999801	5.11633	-0.0746768	0.195522	0.45245
Gpx4|ENSMUSG00000075706	4.74888	-0.0501666	0.429354	0.977718	4.74888	-0.153924	0.0127665	0.0896791	4.74888	-0.182303	0.00999528	0.0701365	4.7489	-0.0255992	0.610128	0.999801	4.74896	-0.210634	0.00202456	0.0175485
Sbno2|ENSMUSG00000035673	3.84041	-0.050876	0.509234	0.984789	3.84045	-0.0131978	0.854954	0.950841	3.8404	-0.102211	0.209358	0.504673	3.8404	0.0374802	0.539492	0.999801	3.84042	-0.0689233	0.364797	0.634304
Stk11|ENSMUSG00000003068	5.77232	0.0209361	0.677942	0.991393	5.77234	-0.0811733	0.085113	0.309838	5.77231	-0.0582656	0.274885	0.585489	5.77232	-0.00359424	0.928303	0.999801	5.77237	-0.0640923	0.200578	0.459856
Dos|ENSMUSG00000035640	7.36676	-0.0516172	0.270799	0.939125	7.36677	-0.173934	0.000437156	0.00727534	7.36677	-0.168965	0.00153951	0.0172724	7.36679	-0.058178	0.123102	0.999801	7.36684	-0.234259	2.12907e-05	0.000452103
Atp5d|ENSMUSG00000003072	6.87348	0.00740452	0.870951	0.996817	6.87345	-0.100374	0.0182639	0.114986	6.87348	-0.094753	0.0496974	0.213763	6.87349	-9.29536e-05	0.997937	0.999801	6.87351	-0.100758	0.0263072	0.122433
Midn|ENSMUSG00000035621	5.50187	-0.131059	0.054758	0.688573	5.50218	0.0236066	0.705728	0.889997	5.50189	-0.155735	0.0336102	0.166419	5.50192	0.0505057	0.336968	0.999801	5.50238	-0.117282	0.0837125	0.271079
Cirbp|ENSMUSG00000045193	5.81812	0.0433581	0.511189	0.984789	5.81803	-0.0623345	0.329982	0.642858	5.81811	0.0422759	0.541988	0.796294	5.8181	-0.065262	0.219798	0.999801	5.81789	-0.01504	0.820382	0.926626
1600002K03Rik|ENSMUSG00000035595	1.26114	0.0333066	0.823896	0.994968	1.26105	-0.261572	0.0574689	0.24341	1.26115	-0.134996	0.396329	0.695759	1.26115	-0.0953725	0.421095	0.999801	1.26118	-0.237587	0.108424	0.321428
Efna2|ENSMUSG00000003070	2.45404	-0.0742348	0.492746	0.982104	2.45417	0.19091	0.0633943	0.258315	2.45401	0.152008	0.183948	0.468609	2.45399	-0.0368914	0.66441	0.999801	2.45401	0.113296	0.29308	0.565581
Mum1|ENSMUSG00000020156	5.11968	-0.0514078	0.374433	0.970798	5.1197	0.0326587	0.547365	0.802635	5.11968	-0.0301136	0.623555	0.844132	5.11968	0.007983	0.861204	0.999801	5.11969	-0.0248783	0.664903	0.851259
Ndufs7|ENSMUSG00000020153	5.83202	-0.004059	0.935546	0.997501	5.83191	-0.193915	3.33884e-05	0.000937003	5.83204	-0.184598	0.000518371	0.00742565	5.83206	-0.0155423	0.695712	0.999801	5.83203	-0.203867	4.288e-05	0.000793281
Gamt|ENSMUSG00000020150	3.80983	-0.1358	0.0810111	0.766966	3.80991	-0.17413	0.0170841	0.110019	3.80982	-0.214169	0.00881513	0.0638566	3.80985	-0.0967614	0.114645	0.999801	3.81	-0.314795	4.6363e-05	0.000839544
Dazap1|ENSMUSG00000069565	5.03821	0.100763	0.0882957	0.786538	5.03819	-0.126229	0.0223851	0.131492	5.0382	0.0452887	0.469174	0.750567	5.0382	-0.0743778	0.109736	0.999801	5.03816	-0.0322525	0.582569	0.800278
Rps15|ENSMUSG00000063457	7.33961	-0.0182327	0.684672	0.991393	7.33956	-0.00106021	0.979949	0.994507	7.3396	-0.0544844	0.250911	0.557971	7.3396	0.0324549	0.358707	0.999801	7.33955	-0.0205261	0.647368	0.839745
Apc2|ENSMUSG00000020135	7.14934	0.0370623	0.406428	0.976828	7.14934	-0.216968	2.92635e-06	0.000130885	7.14935	-0.180829	0.000151997	0.00282125	7.14937	-0.000134971	0.996977	0.999801	7.14935	-0.185788	4.96556e-05	0.000883114
2310011J03Rik|ENSMUSG00000020133	4.74397	-0.0248987	0.693701	0.991393	4.74398	-0.00417998	0.943415	0.982041	4.74397	-0.0681903	0.30913	0.621817	4.74397	0.037545	0.453315	0.999801	4.74401	-0.0353515	0.57319	0.794137
Pcsk4|ENSMUSG00000020131	1.27749	0.274896	0.0708362	0.737566	1.2776	0.2528	0.0738731	0.284096	1.27745	0.0803868	0.61589	0.83928	1.27742	0.44819	0.00015632	0.157386	1.27724	0.522182	0.000554493	0.00628131
Reep6|ENSMUSG00000035504	2.84597	0.0197857	0.840996	0.994968	2.84616	0.0864506	0.348128	0.660668	2.84591	0.215645	0.0415404	0.189919	2.8459	-0.110295	0.149046	0.999801	2.84597	0.100728	0.305812	0.578909
Adamtsl5|ENSMUSG00000043822	3.33321	-0.129262	0.243339	0.928029	3.3331	-0.424299	0.000249352	0.00466072	3.33326	-0.670005	2.15816e-06	8.53895e-05	3.33331	0.110968	0.218028	0.999801	3.3334	-0.562456	1.30355e-05	0.000300309
Plk5|ENSMUSG00000035486	4.18092	-0.502263	0.000195416	0.0597235	4.18116	-0.216142	0.063157	0.257654	4.18088	-0.414914	0.00216186	0.0222444	4.18092	-0.308274	0.00226628	0.384873	4.18121	-0.7253	8.63753e-07	3.12156e-05
Mex3d|ENSMUSG00000048696	3.33741	0.0183283	0.832227	0.994968	3.3374	0.00771552	0.924307	0.975424	3.33742	-0.0863758	0.346643	0.65563	3.33743	0.10874	0.109705	0.999801	3.3374	0.0180309	0.835219	0.933994
Mbd3|ENSMUSG00000035478	6.43595	-0.000664134	0.988645	0.999487	6.43605	0.0394477	0.366592	0.67764	6.43592	0.0690643	0.164107	0.441154	6.43591	-0.0320286	0.382683	0.999801	6.43595	0.0341843	0.464307	0.716487
Uqcr11|ENSMUSG00000020163	5.6765	0.0376649	0.466722	0.978767	5.67651	-0.0741822	0.123275	0.384683	5.6765	-0.0318636	0.561927	0.808384	5.6765	-0.00638929	0.874571	0.999801	5.67654	-0.0421243	0.414918	0.677305
Tcf3|ENSMUSG00000020167	4.47404	-0.0175308	0.795475	0.994794	4.47404	-0.112413	0.0743662	0.285289	4.47402	-0.0852024	0.233764	0.536352	4.47402	-0.0472367	0.375661	0.999801	4.474	-0.136403	0.0420208	0.170862
Rexo1|ENSMUSG00000047417	5.62275	0.00254622	0.960787	0.999487	5.62277	-0.071214	0.142148	0.416479	5.62273	-0.0710106	0.196151	0.486883	5.62274	0.000519166	0.989881	0.999801	5.62275	-0.07502	0.146016	0.383408
Klf16|ENSMUSG00000035397	6.43338	-0.106661	0.0792088	0.761391	6.43346	-0.0693683	0.218677	0.524769	6.43337	-0.153977	0.0194528	0.113665	6.43338	-0.0276187	0.555199	0.999801	6.4335	-0.183459	0.00418324	0.0310097
Gm26710|ENSMUSG00000097013	-0.780086	-0.240989	0.457339	0.978545	-0.780309	-0.0394125	0.897737	0.965108	-0.780091	-0.056941	0.868182	0.956389	-0.780079	-0.221677	0.384392	0.999801	-0.78033	-0.288057	0.367209	0.636748
Abhd17a|ENSMUSG00000003346	6.21923	-0.0110694	0.81918	0.994968	6.21932	-0.0414023	0.36849	0.678985	6.21921	-0.0815737	0.1178	0.366269	6.21921	0.0275177	0.479296	0.999801	6.21927	-0.0602521	0.225316	0.490081
Adat3|ENSMUSG00000035370	5.38976	0.0208361	0.701607	0.991393	5.38976	0.00186584	0.97065	0.991726	5.38975	0.00202464	0.971901	0.990694	5.38975	0.0184999	0.663522	0.999801	5.38978	0.0165774	0.75982	0.89741
Scamp4|ENSMUSG00000078441	4.3809	-0.0211378	0.760092	0.991393	4.38085	-0.000767276	0.990538	0.996948	4.3809	-0.0489758	0.503653	0.774423	4.3809	0.0246153	0.651467	0.999801	4.38088	-0.0284228	0.67977	0.859078
Csnk1g2|ENSMUSG00000003345	6.853	-0.0109733	0.809464	0.994794	6.85307	-0.0939206	0.0274271	0.150872	6.85298	-0.134786	0.00526031	0.0436415	6.85298	0.0295474	0.409993	0.999801	6.85305	-0.110462	0.0150659	0.0818615
Btbd2|ENSMUSG00000003344	5.989	0.0508402	0.296297	0.943756	5.98904	-0.143405	0.00157391	0.0196453	5.989	-0.0704199	0.173618	0.454735	5.98902	-0.0232472	0.546566	0.999801	5.98903	-0.0979059	0.0431693	0.17437
Mknk2|ENSMUSG00000020190	5.30791	-0.0864076	0.120191	0.841571	5.30809	0.124791	0.0164505	0.107284	5.30788	0.125985	0.0314866	0.158702	5.30788	-0.0903586	0.0376973	0.950851	5.30798	0.0311318	0.570504	0.792296
Mob3a|ENSMUSG00000003348	3.338	0.0799754	0.3439	0.968869	3.33799	-0.0950174	0.235549	0.546401	3.33802	0.00553708	0.950896	0.984052	3.33802	-0.020528	0.763641	0.999801	3.3381	-0.0179502	0.830217	0.930913
Izumo4|ENSMUSG00000055862	3.12139	0.0703848	0.437809	0.977718	3.12127	-0.189441	0.0261812	0.146422	3.1214	-0.0734621	0.443042	0.733652	3.12142	-0.0470347	0.509674	0.999801	3.12134	-0.121066	0.179179	0.431574
Ap3d1|ENSMUSG00000020198	7.28588	0.056208	0.208297	0.901971	7.28587	-0.0316821	0.448014	0.740493	7.28588	-0.0104558	0.825774	0.939761	7.28589	0.0349013	0.324657	0.999801	7.28592	0.0153121	0.73148	0.883419
Dot1l|ENSMUSG00000061589	6.11084	0.0451213	0.348126	0.969129	6.11077	-0.326023	3.92939e-08	3.79142e-06	6.11088	-0.362516	5.18104e-08	3.96257e-06	6.11092	0.0815205	0.0391798	0.95377	6.11096	-0.286936	1.05929e-06	3.68536e-05
Plekhj1|ENSMUSG00000035278	4.06313	-0.0704294	0.339834	0.967444	4.06305	-0.0413709	0.548075	0.802905	4.06313	-0.11602	0.137182	0.397867	4.06315	0.000331661	0.995469	0.999801	4.06309	-0.115927	0.112627	0.328713
Sf3a2|ENSMUSG00000020211	3.82511	-0.085776	0.265357	0.937983	3.82503	-0.160912	0.0253281	0.143089	3.82513	-0.251487	0.0019863	0.0210689	3.82515	0.00127407	0.983359	0.999801	3.82515	-0.24891	0.0011144	0.0110177
Amh|ENSMUSG00000035262	-0.993771	-0.0433593	0.874989	0.996817	-0.993743	-0.59665	0.0311864	0.164454	-0.993745	-0.542375	0.0743108	0.279004	-0.993708	-0.0981056	0.669826	0.999801	-0.993678	-0.651526	0.0227704	0.110359
Jsrp1|ENSMUSG00000020216	2.5377	0.0358022	0.769773	0.991506	2.53795	0.021496	0.851549	0.949079	2.53763	0.145989	0.259612	0.568683	2.53762	-0.0908224	0.339705	0.999801	2.53774	0.0446368	0.716628	0.876443
Oaz1|ENSMUSG00000035242	5.39037	0.0296278	0.584589	0.986661	5.39037	-0.0443469	0.376159	0.685149	5.39036	-0.0331572	0.563016	0.808448	5.39036	0.0151329	0.722806	0.999801	5.39033	-0.0178812	0.739812	0.887876
Lingo3|ENSMUSG00000051067	6.9533	-0.0637053	0.281544	0.943213	6.95334	-0.126642	0.0265928	0.14781	6.95331	-0.135505	0.0370615	0.176852	6.95334	-0.0593308	0.207624	0.999801	6.95341	-0.198825	0.00187524	0.0165149
Lsm7|ENSMUSG00000035215	-0.70434	-0.27286	0.27417	0.941762	-0.704427	-0.000114149	0.999398	0.999685	-0.704334	-0.273392	0.306139	0.619291	-0.70432	0.000221086	0.999271	0.999801	-0.704403	-0.277183	0.263991	0.535056
Sppl2b|ENSMUSG00000035206	4.78633	0.0625281	0.317883	0.954943	4.7863	-0.154682	0.00809209	0.0649143	4.78632	-0.16897	0.0109332	0.0752241	4.78632	0.0744067	0.135488	0.999801	4.78634	-0.0995407	0.108143	0.320882
Tmprss9|ENSMUSG00000059406	1.05349	0.0828085	0.632696	0.9909	1.05358	-0.236794	0.151228	0.429459	1.05346	0.0522591	0.773933	0.917897	1.05347	-0.208777	0.132774	0.999801	1.05352	-0.163925	0.338985	0.610421
Timm13|ENSMUSG00000020219	5.26799	-0.0154158	0.784469	0.992931	5.26797	-0.0300694	0.562935	0.812335	5.26799	-0.108271	0.0691602	0.266193	5.26799	0.059634	0.175052	0.999801	5.26799	-0.0520962	0.352929	0.622889
Lmnb2|ENSMUSG00000062075	4.2479	0.0576726	0.41462	0.977718	4.2479	-0.0195602	0.767272	0.914242	4.24791	0.0763143	0.310845	0.623656	4.24791	-0.0408791	0.46904	0.999801	4.24788	0.0339569	0.629893	0.828898
Gadd45b|ENSMUSG00000015312	3.40636	-0.068137	0.636627	0.990949	3.40641	0.151992	0.256563	0.569865	3.40634	0.115983	0.445587	0.735008	3.40634	-0.0422899	0.703412	0.999801	3.40642	0.0676633	0.635677	0.831634
Gm3828|ENSMUSG00000083808	0.0774145	0.0446047	0.82992	0.994968	0.077594	0.0469289	0.812121	0.933807	0.0773835	0.199271	0.363267	0.669184	0.0773834	-0.101462	0.526052	0.999801	0.0774238	0.0873933	0.674049	0.855777
Gng7|ENSMUSG00000048240	10.973	0.00139885	0.976317	0.999487	10.9733	0.197751	7.67467e-06	0.000283468	10.973	0.236614	2.38709e-06	9.2315e-05	10.9729	-0.038513	0.297091	0.999801	10.9731	0.193649	4.329e-05	0.000799135
Diras1|ENSMUSG00000043670	6.48907	0.0265292	0.565047	0.984789	6.48909	-0.128992	0.00290641	0.0309471	6.48906	-0.0969986	0.0476121	0.208032	6.48907	-0.00715699	0.845675	0.999801	6.48913	-0.10722	0.0190857	0.0970071
Slc39a3|ENSMUSG00000046822	6.41788	-0.0216817	0.641976	0.990949	6.41787	-0.113606	0.00876185	0.0686662	6.41788	-0.113583	0.0217553	0.123119	6.4179	-0.0244242	0.507631	0.999801	6.41792	-0.142101	0.00215204	0.0183476
Sgta|ENSMUSG00000004937	6.5212	0.011672	0.801246	0.994794	6.52116	-0.0438343	0.311216	0.62564	6.52119	-0.0423598	0.388535	0.689709	6.5212	0.0083126	0.819531	0.999801	6.52118	-0.0384697	0.405582	0.671101
Thop1|ENSMUSG00000004929	4.97855	0.0108101	0.856805	0.996047	4.97853	-0.0942675	0.0904338	0.32074	4.97856	-0.0437976	0.491514	0.76536	4.97857	-0.0428792	0.365461	0.999801	4.97858	-0.092564	0.119163	0.339917
Map2k2|ENSMUSG00000035027	5.78186	-0.0692866	0.171461	0.875125	5.78197	0.0555221	0.241312	0.553565	5.78182	0.00353368	0.947511	0.983455	5.78182	-0.0196525	0.620654	0.999801	5.78186	-0.0191671	0.703069	0.870529
Zbtb7a|ENSMUSG00000035011	6.79977	-0.0421002	0.353284	0.970269	6.79976	-0.224415	8.11056e-07	4.40871e-05	6.79979	-0.21628	7.43558e-06	0.00023503	6.79982	-0.0515374	0.153516	0.999801	6.79989	-0.274923	4.61311e-08	2.75722e-06
Pias4|ENSMUSG00000004934	3.97567	0.042147	0.574795	0.984789	3.97562	-0.193173	0.00571929	0.0507542	3.9757	-0.161488	0.0433678	0.195708	3.97572	0.00785604	0.895372	0.999801	3.97573	-0.158177	0.0338775	0.147092
Eef2|ENSMUSG00000034994	10.0005	0.0723821	0.117097	0.837616	10.0005	-0.140175	0.00123245	0.0163726	10.0005	-0.113229	0.0206806	0.118464	10.0005	0.0438307	0.229659	0.999801	10.0005	-0.0718687	0.120329	0.342133
Dapk3|ENSMUSG00000034974	4.56874	-0.112721	0.0891573	0.78807	4.56864	-0.0859165	0.16518	0.451146	4.56875	-0.22566	0.00133853	0.0154734	4.56876	0.0227534	0.663025	0.999801	4.56875	-0.203833	0.00200325	0.0174118
Atcay|ENSMUSG00000034958	7.47679	0.100438	0.0244318	0.543129	7.47675	-0.0286978	0.492321	0.771237	7.4768	0.010691	0.821221	0.937421	7.4768	0.0595072	0.0924958	0.999801	7.47681	0.0650891	0.143879	0.379666
Zfr2|ENSMUSG00000034949	4.98821	0.0962499	0.154435	0.865855	4.98816	-0.269129	0.000149117	0.00311946	4.98821	-0.204931	0.00626247	0.0497652	4.98823	0.0314468	0.553912	0.999801	4.98816	-0.178576	0.0102004	0.0610741
Matk|ENSMUSG00000004933	6.93919	-0.0211855	0.664463	0.991393	6.9393	-0.000976928	0.982969	0.995524	6.93915	0.00880282	0.864348	0.954678	6.93915	-0.0307242	0.424156	0.999801	6.93915	-0.0259065	0.591348	0.805345
Mrpl54|ENSMUSG00000034932	3.78333	0.0706344	0.369217	0.970269	3.7833	-0.101023	0.167322	0.454636	3.78331	-0.0476844	0.566734	0.810999	3.78331	0.0153608	0.803379	0.999801	3.78327	-0.0301259	0.700423	0.869439
Apba3|ENSMUSG00000004931	3.25293	-0.020075	0.818675	0.994968	3.25295	0.00219234	0.978657	0.994248	3.25292	-0.0279621	0.762724	0.913244	3.25292	0.00688699	0.920482	0.999801	3.2529	-0.0227744	0.792771	0.913737
Pip5k1c|ENSMUSG00000034902	6.57767	-0.0171477	0.720526	0.991393	6.57769	-0.195083	0.00014158	0.00300343	6.57768	-0.183683	0.000986607	0.0121601	6.57771	-0.0307929	0.421272	0.999801	6.57778	-0.219287	6.64295e-05	0.00112542
Cactin|ENSMUSG00000034889	4.45644	-8.14647e-05	0.999039	0.999917	4.45648	-0.124884	0.0491137	0.221108	4.45644	-0.0771389	0.285165	0.596659	4.45645	-0.0481345	0.369072	0.999801	4.45651	-0.130209	0.0545203	0.20487
Tbxa2r|ENSMUSG00000034881	-0.669175	-0.350346	0.155043	0.866413	-0.669041	-0.145152	0.529819	0.792936	-0.669217	-0.513266	0.0484206	0.210064	-0.669228	0.00815858	0.967813	0.999801	-0.669094	-0.498093	0.0410617	0.168283
Hmg20b|ENSMUSG00000020232	3.47222	0.0521942	0.529234	0.984789	3.4722	-0.0753263	0.332681	0.644843	3.47221	-0.045091	0.607854	0.834034	3.47221	0.0187152	0.776649	0.999801	3.47221	-0.0291154	0.722181	0.878935
Mfsd12|ENSMUSG00000034854	4.15929	0.105345	0.14433	0.856329	4.1594	-0.00661635	0.921629	0.974486	4.15927	0.118912	0.121899	0.372325	4.15927	-0.0208403	0.716162	0.999801	4.15936	0.090532	0.20652	0.467027
4930404N11Rik|ENSMUSG00000020234	-1.93132	-0.570958	0.128111	0.847946	NA	NA	NA	NA	-1.93129	-0.691642	0.0856909	0.303443	-1.93128	0.141011	0.642868	0.999801	-1.93114	-0.536286	0.139329	0.372605
Fzr1|ENSMUSG00000020235	5.58808	-0.00993437	0.848412	0.995521	5.5881	0.000572301	0.9906	0.996948	5.58807	0.017545	0.75125	0.908154	5.58808	-0.0293963	0.475093	0.999801	5.58809	-0.015402	0.765717	0.901086
Dohh|ENSMUSG00000078440	5.06908	-0.00681246	0.907904	0.997217	5.06907	-0.102868	0.0604772	0.250157	5.06907	-0.106055	0.0896818	0.311775	5.06908	-0.00678351	0.883867	0.999801	5.06908	-0.116057	0.0470346	0.18517
2210404O07Rik|ENSMUSG00000078439	-0.531765	0.850975	0.00133587	0.157035	-0.531908	0.142069	0.520635	0.789084	-0.53179	0.93535	0.000935462	0.011681	-0.531829	0.0590871	0.753027	0.999801	-0.532038	0.987399	0.000254862	0.00336678
Nfic|ENSMUSG00000055053	6.42315	-0.0325977	0.544862	0.984789	6.42324	-0.0706139	0.168425	0.456262	6.42313	-0.0881253	0.128401	0.383234	6.42313	-0.0186836	0.660005	0.999801	6.42322	-0.110573	0.0460916	0.182551
Celf5|ENSMUSG00000034818	8.14368	0.000685668	0.987773	0.999487	8.14372	-0.0710579	0.0902985	0.320561	8.14366	-0.0446999	0.344639	0.654136	8.14366	-0.0273249	0.436688	0.999801	8.14368	-0.0788062	0.0772476	0.257683
Ncln|ENSMUSG00000020238	5.52262	0.016335	0.756757	0.991393	5.52263	-0.0677595	0.166827	0.45408	5.52261	-0.0592371	0.28968	0.602036	5.52262	0.00583621	0.888591	0.999801	5.52263	-0.059131	0.25649	0.527165
S1pr4|ENSMUSG00000044199	-1.3234	0.518226	0.0982667	0.808427	-1.32349	-0.554994	0.060474	0.250157	-1.32344	0.430649	0.187548	0.473975	-1.32345	-0.45815	0.068324	0.999801	-1.32372	-0.0505241	0.86989	0.948275
Gna15|ENSMUSG00000034792	1.08606	-0.0128966	0.934884	0.997501	1.08616	-0.0695362	0.641087	0.856395	1.08602	0.0222072	0.89414	0.965669	1.08601	-0.103062	0.400306	0.999801	1.086	-0.087148	0.582162	0.800278
Gna11|ENSMUSG00000034781	6.84208	0.0701321	0.122606	0.843119	6.8421	-0.0799605	0.0597275	0.248503	6.84208	-0.01819	0.706006	0.887663	6.84209	0.00696462	0.846016	0.999801	6.84209	-0.0138187	0.76093	0.898049
Aes|ENSMUSG00000054452	8.30944	0.0162125	0.717281	0.991393	8.30947	-0.104424	0.0125658	0.088777	8.30943	-0.104826	0.0272776	0.144298	8.30944	0.0148791	0.673936	0.999801	8.30947	-0.0924884	0.0383443	0.160455
Tle2|ENSMUSG00000034771	3.23323	0.0280732	0.747159	0.991393	3.23338	-0.186023	0.0251066	0.142406	3.23322	-0.201356	0.0277803	0.146305	3.23323	0.0452164	0.515061	0.999801	3.23343	-0.156896	0.0663651	0.232707
Tle6|ENSMUSG00000034758	1.70345	0.0231755	0.874052	0.996817	1.70401	0.550375	0.000269233	0.00494553	1.7033	0.500404	0.00240795	0.0243668	1.70324	0.0687706	0.527983	0.999801	1.70339	0.572193	0.000290522	0.00375657
BC025920|ENSMUSG00000074862	3.19272	-0.0376334	0.67143	0.991393	3.19258	-0.164506	0.0450318	0.209444	3.19275	-0.220173	0.0199226	0.115739	3.19278	0.0100603	0.8868	0.999801	3.19273	-0.21125	0.0163096	0.0867176
Sirt6|ENSMUSG00000034748	3.10896	0.0720677	0.426802	0.977718	3.10896	0.0136428	0.871888	0.956724	3.10896	-0.0554653	0.563821	0.809025	3.10896	0.141391	0.0494834	0.98091	3.10892	0.0785675	0.382228	0.651424
Ankrd24|ENSMUSG00000054708	3.4632	0.0624132	0.448927	0.977718	3.46325	-0.159224	0.0414603	0.198406	3.4632	-0.135697	0.121944	0.372354	3.46321	0.0396708	0.550987	0.999801	3.46326	-0.0970625	0.234425	0.501284
Gm10778|ENSMUSG00000096856	-1.73645	-0.0899671	0.771613	0.99203	-1.73654	-0.0663905	0.813505	0.934101	-1.73645	-0.298607	0.3679	0.672138	-1.73644	0.138393	0.571654	0.999801	-1.73654	-0.167295	0.590678	0.80484
Zfp433|ENSMUSG00000096795	0.953347	0.033545	0.841362	0.994968	0.953387	0.131097	0.387343	0.695444	0.953316	0.293741	0.100232	0.33285	0.953308	-0.136959	0.282388	0.999801	0.95326	0.155518	0.351935	0.622
Gm3055|ENSMUSG00000094622	-0.471849	-0.183996	0.449097	0.977718	-0.472004	0.0105182	0.962177	0.989189	-0.471817	-0.0133623	0.959211	0.98615	-0.471799	-0.171147	0.372261	0.999801	-0.471906	-0.177789	0.459377	0.712552
Gm4767|ENSMUSG00000094076	-1.91217	-0.0997896	0.760612	0.991393	-1.91219	0.230686	0.439898	0.735281	-1.91218	-0.118903	0.732728	0.899432	-1.91219	0.247592	0.331644	0.999801	-1.91232	0.114583	0.723809	0.879687
Zfp781|ENSMUSG00000096718	-0.588751	-0.188552	0.448134	0.977718	-0.588918	0.0117691	0.958947	0.988198	-0.588719	0.0127645	0.961354	0.987392	-0.5887	-0.200737	0.301512	0.999801	-0.588827	-0.181654	0.459185	0.712429
Zfp873|ENSMUSG00000061371	2.63176	0.093181	0.367284	0.970269	2.63173	0.0564936	0.556127	0.808694	2.63178	0.121847	0.269473	0.579244	2.63178	0.0193437	0.813443	0.999801	2.63174	0.144889	0.157054	0.400101
AU041133|ENSMUSG00000078435	1.98953	-0.04457	0.71441	0.991393	1.98932	0.0514981	0.654438	0.863134	1.98956	-0.0194571	0.880436	0.960068	1.98956	0.0224757	0.818684	0.999801	1.98942	0.00156381	0.989625	0.996754
Zfp938|ENSMUSG00000062931	4.73314	0.0613324	0.333321	0.965937	4.73312	0.0944489	0.11154	0.364466	4.73314	0.0731194	0.276814	0.587875	4.73314	0.076999	0.124446	0.999801	4.73319	0.153334	0.0144687	0.0792703
Gm4924|ENSMUSG00000073427	1.65782	0.0535844	0.710755	0.991393	1.65793	0.122068	0.370263	0.680729	1.65779	0.255977	0.0970801	0.327461	1.65777	-0.0862459	0.443329	0.999801	1.65787	0.167916	0.237604	0.504735
Ap3m1-ps|ENSMUSG00000094683	3.76968	-0.0184373	0.813167	0.994968	3.7696	-0.00676529	0.925835	0.975595	3.76969	-0.000303358	0.997091	0.9989	3.7697	-0.0299577	0.629888	0.999801	3.76971	-0.0309062	0.689645	0.863711
1190007I07Rik|ENSMUSG00000063320	2.48443	0.00407711	0.977278	0.999487	2.48444	-0.0635164	0.633453	0.851903	2.48442	-0.0228542	0.878784	0.959321	2.48442	-0.045262	0.682661	0.999801	2.48445	-0.0670563	0.634636	0.831257
Tdg|ENSMUSG00000034674	3.05748	-0.194031	0.52664	0.984789	3.05743	-0.14472	0.614742	0.841089	3.05745	-0.143795	0.654232	0.861173	3.05745	-0.209014	0.379167	0.999801	3.05751	-0.343843	0.262449	0.533575
Glt8d2|ENSMUSG00000020251	-1.11119	-0.259206	0.425778	0.977718	-1.11135	0.031408	0.91495	0.971996	-1.11115	-0.337554	0.338609	0.648886	-1.11113	0.10039	0.702373	0.999801	-1.11102	-0.217693	0.491042	0.738011
Hcfc2|ENSMUSG00000020246	4.98135	0.0837715	0.16112	0.871395	4.98134	0.00884181	0.874233	0.957289	4.98136	0.0869689	0.17204	0.452292	4.98137	0.00257975	0.956591	0.999801	4.98143	0.0859943	0.147696	0.386079
Nfyb|ENSMUSG00000020248	5.74262	-0.0628102	0.216451	0.910553	5.74258	0.00735015	0.876386	0.957685	5.74262	-0.00378085	0.944308	0.982954	5.74262	-0.0573003	0.152173	0.999801	5.7426	-0.0614473	0.225679	0.490671
Txnrd1|ENSMUSG00000020250	6.612	-0.0214585	0.801162	0.994794	6.61197	-0.0091679	0.908657	0.969333	6.61199	0.0367402	0.682782	0.875424	6.61199	-0.0704662	0.293539	0.999801	6.61204	-0.0384035	0.65133	0.842726
Gm4799|ENSMUSG00000071151	3.58949	0.0419522	0.608097	0.987824	3.58941	0.0246179	0.744586	0.90555	3.58948	-0.0349944	0.688204	0.878431	3.58948	0.09855	0.125898	0.999801	3.58941	0.0614431	0.452101	0.708165
Chst11|ENSMUSG00000034612	6.95594	-0.0380422	0.529359	0.984789	6.95587	-0.270229	3.52146e-05	0.000980243	6.95599	-0.327178	1.68265e-05	0.000457573	6.95603	0.0157445	0.74525	0.999801	6.95611	-0.313824	1.11287e-05	0.000262753
Slc41a2|ENSMUSG00000034591	4.06522	0.0917133	0.209484	0.903457	4.06519	-0.004581	0.946691	0.983197	4.06523	0.0834371	0.282437	0.593924	4.06522	0.000548356	0.992505	0.999801	4.06522	0.0821889	0.255543	0.526169
D10Wsu102e|ENSMUSG00000020255	4.66473	0.0605834	0.401999	0.97622	4.66469	0.00104195	0.987782	0.996637	4.66476	-0.021908	0.775127	0.91819	4.66478	0.0830218	0.158548	0.999801	4.66479	0.058878	0.412276	0.675152
Aldh1l2|ENSMUSG00000020256	2.25626	0.086148	0.452168	0.977718	2.25628	0.0480236	0.647605	0.859104	2.25626	0.193237	0.112472	0.355969	2.25624	-0.068836	0.437617	0.999801	2.25628	0.130737	0.249635	0.519574
A230046K03Rik|ENSMUSG00000034560	5.56006	0.0450465	0.390267	0.972161	5.55993	-0.00215867	0.964826	0.990427	5.56008	-0.0120235	0.829357	0.941358	5.56008	0.051096	0.216651	0.999801	5.56002	0.041474	0.427371	0.688353
Appl2|ENSMUSG00000020263	6.77256	-0.107372	0.0187888	0.508495	6.77263	0.0268604	0.53445	0.795219	6.77254	-0.0926206	0.0540164	0.226206	6.77254	0.00846925	0.813369	0.999801	6.77259	-0.0815318	0.0730037	0.247653
1500009L16Rik|ENSMUSG00000087651	3.81581	0.179647	0.0359242	0.608365	3.81614	0.98801	6.37629e-14	1.36891e-10	3.81565	1.17573	2.03981e-14	4.36825e-11	3.81556	-0.00975501	0.872739	0.999801	3.81544	1.16539	4.04012e-15	8.63272e-12
Nuak1|ENSMUSG00000020032	5.18184	0.106167	0.0628922	0.717667	5.18191	0.129471	0.0155822	0.102972	5.18183	0.196143	0.00117486	0.0139485	5.18181	0.0363745	0.41555	0.999801	5.18186	0.231972	4.62796e-05	0.000838922
Ckap4|ENSMUSG00000046841	3.08061	-0.0615382	0.505024	0.983437	3.08068	0.142707	0.0971735	0.334393	3.08057	0.118032	0.22797	0.529282	3.08055	-0.0391757	0.585932	0.999801	3.08059	0.0794475	0.385406	0.654139
Tcp11l2|ENSMUSG00000020034	4.22227	0.1001	0.164368	0.87396	4.22221	0.117135	0.0802461	0.298511	4.22227	0.207728	0.00666336	0.0521502	4.22226	0.00194061	0.972426	0.999801	4.22224	0.215767	0.00267555	0.021779
Gm17249|ENSMUSG00000097309	-0.0648348	-0.127432	0.546674	0.984789	-0.0648906	-0.0458531	0.813235	0.934101	-0.0648414	-0.0689089	0.756827	0.910274	-0.0648453	-0.119877	0.47354	0.999801	-0.0648541	-0.174804	0.393218	0.660881
Polr3b|ENSMUSG00000034453	4.23052	0.0970482	0.174439	0.878634	4.23048	-0.00272299	0.967296	0.991223	4.23051	0.0712472	0.349162	0.657151	4.23051	0.0179862	0.749467	0.999801	4.2305	0.0902173	0.203172	0.462822
Rfx4|ENSMUSG00000020037	4.98083	-0.0349897	0.558897	0.984789	4.98089	0.0903831	0.106045	0.353364	4.9808	0.135344	0.0322331	0.161279	4.98078	-0.083543	0.0758739	0.999801	4.98083	0.0489715	0.408784	0.673527
Ric8b|ENSMUSG00000035620	7.39939	-0.0581524	0.193585	0.896661	7.3994	-0.136187	0.00118512	0.0159268	7.39943	-0.196658	3.49603e-05	0.000843577	7.39946	-0.0014642	0.96713	0.999801	7.39958	-0.198581	1.3211e-05	0.000303724
Fhl4|ENSMUSG00000050035	0.59413	0.474652	0.0167535	0.498773	0.593904	-0.284318	0.10676	0.354457	0.594129	0.310521	0.131803	0.388978	0.594116	-0.127844	0.393211	0.999801	0.593943	0.173808	0.360059	0.629716
AI597468|ENSMUSG00000060935	6.32035	-0.0980933	0.0379308	0.614628	6.32043	0.135194	0.00217001	0.0249631	6.32035	0.088365	0.0794832	0.290638	6.32034	-0.0577812	0.120164	0.999801	6.32044	0.0334228	0.47782	0.727583
Mterfd3|ENSMUSG00000049038	4.41803	-0.0426986	0.532732	0.984789	4.41783	-0.0801186	0.210058	0.51451	4.41806	-0.20821	0.0042076	0.0370667	4.41808	0.0819621	0.131641	0.999801	4.41799	-0.127502	0.0616797	0.221869
Cry1|ENSMUSG00000020038	5.12459	-0.0929897	0.121939	0.843119	5.12453	-0.0222775	0.686551	0.87882	5.12458	-0.0589669	0.348355	0.656607	5.12459	-0.0573494	0.216793	0.999801	5.12465	-0.1261	0.0372341	0.15735
Gm8394|ENSMUSG00000050490	4.17054	-0.0922699	0.202844	0.898703	4.17047	0.0336387	0.614335	0.840862	4.17056	-0.0793286	0.305788	0.618799	4.17057	0.0126275	0.825248	0.999801	4.1706	-0.066013	0.359603	0.629177
Btbd11|ENSMUSG00000020042	1.75989	0.215887	0.177217	0.879108	1.76012	0.217454	0.146233	0.423549	1.75984	0.457463	0.00935902	0.0670313	1.7598	-0.0218438	0.860105	0.999801	1.75987	0.433069	0.00848556	0.0532301
Pwp1|ENSMUSG00000001785	4.85352	0.0182114	0.766996	0.991393	4.85348	-0.0806516	0.162141	0.446582	4.85354	-0.0359629	0.582092	0.818886	4.85356	-0.0317254	0.516913	0.999801	4.8536	-0.0667395	0.273784	0.545252
Prdm4|ENSMUSG00000035529	5.09256	-0.00335838	0.953894	0.999369	5.09259	-0.0323872	0.550944	0.804221	5.09258	-0.0376832	0.541809	0.796235	5.09259	-0.00257653	0.955476	0.999801	5.09267	-0.0411147	0.477047	0.727249
Rtcb|ENSMUSG00000001783	6.78668	-0.019183	0.673764	0.991393	6.78662	0.011875	0.780883	0.920561	6.78668	-0.0198204	0.682197	0.875088	6.78669	0.0083527	0.816469	0.999801	6.78666	-0.0109662	0.808929	0.921671
Fbxo7|ENSMUSG00000001786	5.26981	-0.0540171	0.33342	0.965937	5.26978	0.0722037	0.167113	0.454357	5.2698	-0.0433824	0.461269	0.745047	5.2698	0.0561779	0.199908	0.999801	5.2698	0.0171933	0.756224	0.895462
Timp3|ENSMUSG00000020044	7.54287	-0.014075	0.753687	0.991393	7.54299	-0.0104162	0.804839	0.930535	7.54284	0.0883522	0.0712631	0.271548	7.54284	-0.113145	0.0030689	0.421093	7.5429	-0.0297815	0.507458	0.750842
Syn3|ENSMUSG00000059602	3.99485	0.0962851	0.197104	0.896661	3.99488	-0.0947504	0.17073	0.460038	3.99485	0.0583495	0.463878	0.746914	3.99486	-0.0613624	0.29925	0.999801	3.99484	-0.00171158	0.981645	0.993923
1810014B01Rik|ENSMUSG00000097412	1.32555	-0.128443	0.38079	0.971278	1.32562	0.050295	0.713016	0.892895	1.32558	-0.0658709	0.675809	0.872097	1.32558	-0.0297657	0.798575	0.999801	1.32577	-0.0790428	0.58572	0.802308
Gm15344|ENSMUSG00000084899	0.484141	-0.201097	0.27786	0.942414	0.484383	0.136538	0.440643	0.736047	0.484139	0.0555733	0.77748	0.91889	0.484146	-0.117515	0.430244	0.999801	0.484416	-0.0661795	0.716401	0.87629
Hsp90b1|ENSMUSG00000020048	8.86122	-0.0967872	0.151646	0.863382	8.86123	0.147641	0.0223938	0.131492	8.86123	0.0107409	0.878797	0.959321	8.86122	0.0356916	0.499744	0.999801	8.86132	0.0409751	0.537493	0.769635
BC030307|ENSMUSG00000044937	1.03272	0.0960187	0.54447	0.984789	1.0328	0.0120822	0.93532	0.979544	1.0327	0.185212	0.266034	0.576049	1.03269	-0.0788559	0.53157	0.999801	1.03283	0.10673	0.488314	0.735958
Fabp3-ps1|ENSMUSG00000056366	3.54974	0.101443	0.221311	0.912571	3.54983	0.469515	3.63658e-08	3.65253e-06	3.54966	0.518952	5.76404e-08	4.3122e-06	3.54962	0.0510093	0.427979	0.999801	3.54954	0.566054	2.43154e-09	2.47409e-07
Nt5dc3|ENSMUSG00000054027	6.30028	-0.0048058	0.924074	0.997501	6.30049	0.310797	2.43349e-07	1.70592e-05	6.30024	0.247801	6.54049e-05	0.00139022	6.30022	0.053685	0.180386	0.999801	6.30035	0.298384	1.58676e-06	5.17636e-05
Stab2|ENSMUSG00000035459	-0.278617	0.25765	0.363199	0.970269	-0.278625	-0.0662463	0.796583	0.927155	-0.278646	0.295889	0.320874	0.632809	-0.278651	-0.101803	0.654885	0.999801	-0.278676	0.189682	0.488362	0.735965
Ascl1|ENSMUSG00000020052	1.09767	0.153863	0.366085	0.970269	1.09734	-0.0189275	0.89877	0.965317	1.09771	0.0962142	0.599677	0.829525	1.0977	0.0170974	0.896442	0.999801	1.09749	0.124769	0.455783	0.711333
Igf1|ENSMUSG00000020053	-1.04278	0.0594641	0.841779	0.994968	-1.04257	0.134466	0.622598	0.845239	-1.04279	0.257243	0.408007	0.7046	-1.04279	-0.0695073	0.762811	0.999801	-1.04258	0.188689	0.513873	0.754522
Parpbp|ENSMUSG00000035365	-0.741639	-0.422996	0.183419	0.888378	-0.742011	0.0601183	0.834778	0.942331	-0.7416	-0.242577	0.476085	0.754373	-0.741582	-0.145516	0.565721	0.999801	-0.741792	-0.360725	0.249882	0.519771
Nup37|ENSMUSG00000035351	2.08732	-0.102445	0.396339	0.972965	2.08725	0.0792449	0.475518	0.758679	2.08731	0.0279814	0.825895	0.939836	2.08732	-0.0618712	0.512448	0.999801	2.08736	-0.0324866	0.781746	0.909361
Ccdc53|ENSMUSG00000020056	3.79051	-0.0697556	0.374246	0.970798	3.79046	0.0244252	0.736268	0.902559	3.79052	-0.130293	0.117759	0.36621	3.79053	0.079939	0.196201	0.999801	3.79056	-0.0511159	0.511082	0.752817
Dram1|ENSMUSG00000020057	0.110684	0.175632	0.410223	0.97686	0.11069	-0.296605	0.157228	0.438303	0.110728	0.0283432	0.900693	0.968816	0.110769	-0.144152	0.418885	0.999801	0.11085	-0.115953	0.585596	0.80229
Gnptab|ENSMUSG00000035311	6.32557	0.0251105	0.593361	0.987824	6.32553	0.0586092	0.186046	0.483045	6.32557	0.0852015	0.0874531	0.306717	6.32557	-0.00403057	0.913754	0.999801	6.32556	0.0789469	0.0921543	0.288778
Chpt1|ENSMUSG00000060002	6.52873	0.0594651	0.201441	0.897221	6.52874	0.0724561	0.0959898	0.331743	6.52871	0.102632	0.0375617	0.1781	6.5287	0.0253255	0.486175	0.999801	6.52872	0.126926	0.00713589	0.046611
Mybpc1|ENSMUSG00000020061	-0.964059	-0.310951	0.285518	0.943213	-0.963961	-0.0575918	0.836715	0.942902	-0.964028	-0.309325	0.320767	0.632809	-0.963999	-0.0615575	0.792656	0.999801	-0.963568	-0.375851	0.18869	0.44385
Gm4925|ENSMUSG00000069540	-0.851005	-0.369193	0.198669	0.896759	-0.851256	-0.394659	0.125178	0.388355	-0.850955	-0.78144	0.0158866	0.0988629	-0.850924	-0.00805035	0.972181	0.999801	-0.851011	-0.77499	0.00854473	0.0535031
Arl1|ENSMUSG00000060904	6.54917	-0.0626157	0.175377	0.878634	6.54911	0.0463426	0.283039	0.598522	6.54917	0.0160937	0.742597	0.903394	6.54918	-0.0397579	0.275214	0.999801	6.54918	-0.0206154	0.653013	0.843524
Utp20|ENSMUSG00000004356	5.00736	0.0271765	0.647459	0.991393	5.00737	0.126155	0.0234233	0.135773	5.00735	0.123582	0.0504453	0.216111	5.00735	0.0281799	0.548565	0.999801	5.00734	0.146922	0.0128767	0.0728854
Ano4|ENSMUSG00000035189	4.45283	0.0287619	0.705747	0.991393	4.45281	0.209486	0.00765923	0.0625297	4.45281	0.270347	0.00166553	0.0183655	4.45279	-0.0379203	0.528786	0.999801	4.4528	0.243859	0.00303183	0.0238663
Gas2l3|ENSMUSG00000074802	1.27905	0.164537	0.295504	0.943662	1.27894	0.370711	0.0123288	0.0874988	1.27902	0.623461	0.000617456	0.00846938	1.27898	-0.0960825	0.416773	0.999801	1.2788	0.525406	0.00179406	0.0160047
Nr1h4|ENSMUSG00000047638	-1.80293	-0.1897	0.577798	0.985311	-1.80291	-0.0825151	0.805925	0.930952	-1.80296	-0.447042	0.20412	0.498004	-1.80297	0.18448	0.498531	0.999801	-1.80292	-0.267058	0.414913	0.677305
Slc17a8|ENSMUSG00000019935	5.06998	0.089036	0.167787	0.87426	5.07007	-0.00945777	0.871778	0.956724	5.06996	-0.0790122	0.244958	0.549788	5.06996	0.156813	0.00375996	0.441085	5.07	0.077607	0.220249	0.483677
Scyl2|ENSMUSG00000069539	5.3191	0.0272451	0.6191	0.988056	5.31906	0.0523898	0.308293	0.622981	5.31911	0.0771947	0.184386	0.469029	5.31912	-0.000752501	0.986224	0.999801	5.31911	0.0757547	0.162446	0.408178
1500026H17Rik|ENSMUSG00000097383	0.926609	0.152224	0.433696	0.977718	0.926619	0.186311	0.309112	0.623759	0.926569	0.227109	0.268185	0.57844	0.92654	0.110704	0.451466	0.999801	0.926379	0.335836	0.0925585	0.289779
Actr6|ENSMUSG00000019948	4.41558	-0.0558932	0.412278	0.977528	4.41548	0.114252	0.0721154	0.280181	4.41559	0.0344615	0.63544	0.850882	4.4156	0.0198414	0.715851	0.999801	4.41554	0.0527486	0.434417	0.693299
Uhrf1bp1l|ENSMUSG00000019951	6.88785	0.027857	0.539516	0.984789	6.8878	0.0957175	0.0245378	0.140195	6.88785	0.0854492	0.0759463	0.28322	6.88785	0.0330267	0.355916	0.999801	6.88779	0.118416	0.00903013	0.0557004
Anks1b|ENSMUSG00000058589	8.91202	-0.21175	0.00627999	0.30456	8.91204	-0.212846	0.00328125	0.03399	8.91203	-0.258323	0.00203069	0.0213435	8.91206	-0.172727	0.00471891	0.472333	8.91218	-0.432362	1.32649e-06	4.44442e-05
Apaf1|ENSMUSG00000019979	4.17056	0.0558797	0.436345	0.977718	4.17038	-0.0974786	0.146662	0.424161	4.17059	-0.0461964	0.547091	0.7995	4.17061	0.000718187	0.99	0.999801	4.17046	-0.0412846	0.564003	0.787862
Ikbip|ENSMUSG00000019975	3.44966	0.101331	0.225702	0.916572	3.44973	0.173795	0.0260422	0.146009	3.44963	0.241244	0.00668908	0.0522559	3.44961	0.0330651	0.61763	0.999801	3.44961	0.270315	0.00118846	0.0115692
Slc25a3|ENSMUSG00000061904	8.58964	-0.049712	0.270004	0.939125	8.5896	-0.0446001	0.289749	0.604177	8.58966	-0.122214	0.010466	0.0727693	8.58967	0.0236455	0.50679	0.999801	8.58969	-0.0993012	0.0270971	0.125189
Tmpo|ENSMUSG00000019961	5.19111	-0.0261295	0.64545	0.990949	5.19097	-0.0185709	0.726859	0.898501	5.19114	-0.0300551	0.61649	0.839332	5.19115	-0.0210032	0.639451	0.999801	5.19111	-0.0479738	0.393213	0.660881
Rmst|ENSMUSG00000097348	0.965977	-0.02668	0.875155	0.996828	0.965906	0.0245666	0.876518	0.957707	0.965972	-0.14582	0.424806	0.718666	0.965965	0.140611	0.305956	0.999801	0.965943	0.00243207	0.988506	0.996419
Nedd1|ENSMUSG00000019988	2.42674	-0.0208856	0.849512	0.995521	2.4267	0.179586	0.0802926	0.29862	2.42672	0.242009	0.0362243	0.174236	2.42671	-0.0906971	0.291109	0.999801	2.42672	0.153761	0.156401	0.399034
Gm872|ENSMUSG00000020014	2.70346	0.314715	0.262193	0.936881	2.70321	0.0711321	0.781112	0.920705	2.70357	0.0328493	0.911172	0.971944	2.70361	0.351873	0.126288	0.999801	2.70349	0.380595	0.162849	0.408472
Cdk17|ENSMUSG00000020015	8.55504	-0.0407629	0.365561	0.970269	8.55494	-0.0130661	0.757179	0.910786	8.55506	-0.0257348	0.590203	0.823294	8.55508	-0.0344446	0.333671	0.999801	8.55505	-0.0603051	0.180071	0.432931
Elk3|ENSMUSG00000008398	2.86786	-0.0600514	0.533841	0.984789	2.86798	0.00483314	0.957774	0.987677	2.86783	-0.057322	0.574997	0.815184	2.86782	0.00347253	0.963824	0.999801	2.86794	-0.0597213	0.532115	0.765957
Lta4h|ENSMUSG00000015889	5.59403	-0.0695356	0.178214	0.880924	5.59404	0.0764841	0.115069	0.370511	5.59402	0.0639435	0.245104	0.549838	5.59402	-0.0613634	0.134249	0.999801	5.59406	0.00475665	0.926529	0.972497
Snrpf|ENSMUSG00000020018	2.61915	0.088449	0.395579	0.972965	2.61908	0.00456486	0.962059	0.989139	2.61915	-0.00734584	0.94746	0.983455	2.61915	0.0952865	0.246966	0.999801	2.61907	0.083653	0.422331	0.683526
Ntn4|ENSMUSG00000020019	3.10483	0.100596	0.461501	0.978767	3.10486	0.000114197	0.99932	0.999685	3.10481	0.154539	0.285544	0.597288	3.10481	-0.051223	0.639852	0.999801	3.10486	0.0962083	0.470775	0.721807
Gm3571|ENSMUSG00000090610	3.57973	0.0218208	0.789012	0.994794	3.57971	-0.0373494	0.619023	0.842952	3.57975	-0.0529027	0.541229	0.796235	3.57975	0.0316638	0.621454	0.999801	3.57977	-0.0206526	0.798339	0.916757
Metap2|ENSMUSG00000036112	6.42742	0.0343845	0.460163	0.978767	6.42737	0.0931687	0.0326863	0.16945	6.42741	0.0913829	0.0642007	0.253877	6.4274	0.0316594	0.389466	0.999801	6.42737	0.123786	0.0075203	0.0485102
Vezt|ENSMUSG00000036099	6.63202	0.0146112	0.750458	0.991393	6.63195	-0.0238604	0.580973	0.825299	6.63203	-0.0174631	0.719917	0.894225	6.63204	0.00562871	0.876636	0.999801	6.63202	-0.014515	0.750828	0.893104
Fgd6|ENSMUSG00000020021	4.64827	0.0650306	0.31543	0.952987	4.64847	0.0457958	0.454597	0.744149	4.64824	0.127073	0.0648041	0.254873	4.64822	-0.0157208	0.757908	0.999801	4.64837	0.108374	0.0948675	0.294469
Nr2c1|ENSMUSG00000005897	3.00516	-0.102028	0.271983	0.939497	3.00508	-0.00836513	0.922884	0.975071	3.00517	-0.125455	0.202005	0.494787	3.00518	0.0104358	0.887269	0.999801	3.00519	-0.114989	0.208204	0.46953
Ndufa12|ENSMUSG00000020022	4.45838	0.055015	0.419494	0.977718	4.45834	-0.0600857	0.341089	0.654401	4.45837	0.0669207	0.354972	0.66181	4.45837	-0.0750406	0.16015	0.999801	4.45839	-0.0101867	0.880446	0.952881
Tmcc3|ENSMUSG00000020023	5.80454	0.0153298	0.798596	0.994794	5.80449	0.0643256	0.261919	0.575469	5.80454	0.0785918	0.22041	0.519405	5.80453	-0.00345693	0.941927	0.999801	5.80451	0.0792928	0.190158	0.445525
Ccdc41os1|ENSMUSG00000097164	5.11097	0.0423806	0.650693	0.991393	5.11071	-0.241797	0.00858027	0.0679733	5.11101	-0.170145	0.0959204	0.325187	5.11103	-0.0386143	0.601972	0.999801	5.11086	-0.198727	0.0399652	0.165335
Ccdc41|ENSMUSG00000020024	5.4883	-0.0719102	0.176037	0.878634	5.48834	0.0540648	0.276628	0.591593	5.48828	0.0204059	0.717635	0.892978	5.48829	-0.0416326	0.318916	0.999801	5.48839	-0.0251516	0.633875	0.831048
Plxnc1|ENSMUSG00000074785	4.89723	0.0978693	0.159889	0.871395	4.89726	-0.0314022	0.621094	0.844065	4.89724	0.17621	0.0202713	0.116986	4.89723	-0.11219	0.0438454	0.967681	4.89726	0.0589553	0.387317	0.655476
Cradd|ENSMUSG00000045867	2.80706	-0.0449445	0.646875	0.991393	2.80698	-0.115103	0.204582	0.508199	2.80709	-0.141773	0.175605	0.457924	2.80712	-0.0248951	0.750285	0.999801	2.80709	-0.158934	0.101511	0.307447
Socs2|ENSMUSG00000020027	3.7803	-0.205391	0.0453559	0.648011	3.78032	-0.169048	0.0726364	0.281419	3.78033	-0.388829	0.00095382	0.0118412	3.78038	0.00620762	0.937356	0.999801	3.78045	-0.379825	0.000454967	0.00538811
Mrpl42|ENSMUSG00000062981	4.70556	-0.0501005	0.435522	0.977718	4.70556	0.0865823	0.146992	0.424516	4.70556	0.0259594	0.703478	0.886697	4.70556	0.00697724	0.889759	0.999801	4.70562	0.0297636	0.642961	0.836882
Ube2n|ENSMUSG00000074781	6.87884	-0.057171	0.207958	0.90156	6.87882	0.0533766	0.208017	0.512348	6.87885	0.0193572	0.688465	0.8786	6.87885	-0.0287611	0.422128	0.999801	6.87887	-0.00934896	0.836077	0.934417
Nudt4|ENSMUSG00000020029	6.56799	0.0612535	0.222931	0.914509	6.56786	0.0473654	0.313213	0.626609	6.56801	0.0795642	0.135267	0.395012	6.56801	0.0251805	0.520621	0.999801	6.56801	0.10495	0.0382002	0.160127
Anapc15-ps|ENSMUSG00000074780	-0.0227389	0.0341219	0.877451	0.996828	-0.0227558	-0.0541357	0.794383	0.926614	-0.0227436	-0.232558	0.333668	0.644319	-0.0227549	0.210319	0.241112	0.999801	-0.0228297	-0.0144786	0.947797	0.980136
Eea1|ENSMUSG00000036499	6.19873	0.00480301	0.919758	0.997501	6.1987	0.00380792	0.9319	0.978623	6.19874	0.049528	0.329101	0.640773	6.19874	-0.0460904	0.22113	0.999801	6.19875	0.0044487	0.925246	0.972166
Btg1|ENSMUSG00000036478	5.01563	0.0816982	0.170032	0.874669	5.01559	0.0517853	0.350037	0.66232	5.01563	0.223526	0.000414086	0.00619574	5.01562	-0.096419	0.0384323	0.95377	5.01557	0.130054	0.0283001	0.129313
Dcn|ENSMUSG00000019929	2.74737	0.0832155	0.523526	0.984789	2.74742	-0.0374971	0.753064	0.909236	2.74737	-0.224016	0.116713	0.363947	2.74737	0.265125	0.014193	0.716463	2.74752	0.0475894	0.716369	0.87629
Lum|ENSMUSG00000036446	-0.00610106	-0.107145	0.634434	0.9909	-0.00594835	0.447379	0.0389849	0.190002	-0.00613485	-0.262535	0.270692	0.580381	-0.00615381	0.596228	0.00166223	0.3387	-0.00592446	0.344027	0.123192	0.346777
Gm10754|ENSMUSG00000074776	1.9709	-0.108382	0.429821	0.977718	1.97104	-0.0318789	0.805262	0.930651	1.9709	0.0106573	0.942031	0.982114	1.97092	-0.155432	0.162026	0.999801	1.97113	-0.151277	0.273399	0.545252
C030005K15Rik|ENSMUSG00000079183	-1.43905	-0.0871279	0.808068	0.994794	-1.43882	-0.0846262	0.803097	0.929868	-1.43907	0.0308504	0.935815	0.98104	-1.43908	-0.201623	0.471599	0.999801	-1.43898	-0.17159	0.62458	0.82593
Atp2b1|ENSMUSG00000019943	10.8021	-0.219746	0.00062041	0.111017	10.8022	0.0472756	0.374408	0.683668	10.8021	-0.0693443	0.267682	0.57768	10.8021	-0.11113	0.0182087	0.77234	10.8022	-0.179647	0.00349846	0.0268053
Poc1b|ENSMUSG00000019952	2.03414	0.196872	0.106671	0.82057	2.0341	-0.028308	0.803297	0.929868	2.03415	0.00535559	0.966856	0.989375	2.03414	0.159651	0.0939784	0.999801	2.03413	0.168322	0.165118	0.411635
Galnt4|ENSMUSG00000090035	2.7362	0.0992228	0.326289	0.959615	2.73622	0.188414	0.0515273	0.227634	2.73618	0.158754	0.140155	0.402672	2.73617	0.128026	0.106597	0.999801	2.73612	0.286759	0.00676686	0.0446613
Dusp6|ENSMUSG00000019960	5.69955	-0.134384	0.174102	0.878398	5.69984	0.202415	0.0325295	0.168892	5.69956	0.0417347	0.686011	0.877471	5.69957	0.0245874	0.747037	0.999801	5.7	0.0605082	0.534728	0.767798
Gad1-ps|ENSMUSG00000090665	3.85045	-0.0684089	0.370089	0.970696	3.85037	-0.0268585	0.708075	0.891	3.85046	-0.0160291	0.843327	0.947091	3.85047	-0.0830217	0.17456	0.999801	3.85038	-0.0953233	0.209562	0.471224
Csl|ENSMUSG00000046934	-0.978892	0.132197	0.609503	0.987824	-0.97901	0.0763154	0.750719	0.908268	-0.978873	0.130206	0.642048	0.854468	-0.978879	0.0790566	0.702473	0.999801	-0.979056	0.207433	0.426764	0.687827
Kitl|ENSMUSG00000019966	4.15008	-0.0477733	0.509747	0.984789	4.15002	0.0688349	0.30715	0.621574	4.15009	0.0065173	0.93299	0.979799	4.15009	0.00923246	0.872094	0.999801	4.15006	0.0168598	0.815562	0.924258
Tmtc3|ENSMUSG00000036676	4.65691	0.0801341	0.21226	0.906284	4.65688	-0.0536492	0.37345	0.683295	4.65695	-0.0101099	0.882785	0.960728	4.65697	0.0332208	0.517023	0.999801	4.65699	0.0265557	0.677896	0.857808
Cep290|ENSMUSG00000019971	4.60173	-0.0468383	0.471577	0.978767	4.60164	-0.102714	0.0909263	0.321925	4.60177	-0.143443	0.0388801	0.181993	4.60179	-0.0116764	0.822635	0.999801	4.60183	-0.153747	0.0170207	0.0893527
4930430F08Rik|ENSMUSG00000046567	4.4174	-0.120154	0.0780522	0.7585	4.41734	0.0892637	0.16133	0.445566	4.41741	0.0153129	0.833145	0.943013	4.41742	-0.0527897	0.329326	0.999801	4.41735	-0.0317991	0.639958	0.834562
Mgat4c|ENSMUSG00000019888	3.19615	0.219046	0.0142991	0.461174	3.19608	0.0407936	0.618831	0.842952	3.19616	0.40862	2.77608e-05	0.000694304	3.19616	-0.157718	0.0244781	0.845086	3.19609	0.256326	0.00401225	0.0299108
Nts|ENSMUSG00000019890	3.14413	0.374505	0.144263	0.856329	3.14375	0.981569	0.000188078	0.00375609	3.14408	1.25105	4.21198e-05	0.0009831	3.14398	0.0906688	0.626163	0.999801	3.14349	1.35705	9.54111e-06	0.00023233
Rassf9|ENSMUSG00000044921	0.420771	0.0641801	0.809128	0.994794	0.42048	-0.0769202	0.744278	0.90555	0.42078	-0.0785273	0.780234	0.920206	0.420757	0.044205	0.822232	0.999801	0.420658	-0.038195	0.884966	0.954122
Lrriq1|ENSMUSG00000019892	0.958225	0.484268	0.00521783	0.287551	0.958074	0.340373	0.0250648	0.142258	0.9582	0.762486	0.00010919	0.00216009	0.958162	0.0591834	0.650681	0.999801	0.958	0.82495	1.27815e-05	0.000296454
Slc6a15|ENSMUSG00000019894	6.18764	0.143296	0.00620414	0.30456	6.18751	0.113018	0.0192075	0.119168	6.18764	0.200374	0.000540425	0.00766723	6.18764	0.0507156	0.196114	0.999801	6.18747	0.251603	1.58968e-05	0.000351995
Tmtc2|ENSMUSG00000036019	4.39144	-0.0368775	0.592887	0.987824	4.39148	0.0856555	0.186464	0.483473	4.39141	0.0768844	0.292214	0.604396	4.3914	-0.0308493	0.568912	0.999801	4.39144	0.0457163	0.50541	0.74988
Gm15663|ENSMUSG00000085282	3.12313	-0.145366	0.105826	0.818728	3.12307	0.0348701	0.680441	0.875604	3.12312	-0.1283	0.177557	0.460061	3.12313	0.0151139	0.831785	0.999801	3.12312	-0.110427	0.215937	0.477953
Ccdc59|ENSMUSG00000019897	5.01554	-0.110169	0.0637308	0.721286	5.01551	0.0531024	0.342013	0.65537	5.01554	-0.0863789	0.169455	0.449003	5.01554	0.0251739	0.590642	0.999801	5.01555	-0.0595969	0.312054	0.585331
Mettl25|ENSMUSG00000036009	2.52154	0.0326357	0.75902	0.991393	2.52151	0.100143	0.312918	0.626558	2.52153	0.160336	0.156432	0.430797	2.52152	-0.0337095	0.687132	0.999801	2.52146	0.130939	0.214488	0.476634
Ppfia2|ENSMUSG00000053825	6.2295	0.102269	0.0308726	0.577846	6.22945	0.156637	0.000429842	0.00718844	6.2295	0.224939	8.45026e-06	0.000260846	6.22949	0.0300613	0.42437	0.999801	6.22944	0.253841	8.21099e-08	4.57194e-06
C230021G24Rik|ENSMUSG00000097869	-0.288922	0.444328	0.0873041	0.785838	-0.288973	0.212498	0.345446	0.658306	-0.288966	0.602888	0.0288942	0.149713	-0.289015	0.0532903	0.776027	0.999801	-0.289157	0.641271	0.0160048	0.0855489
Acss3|ENSMUSG00000035948	-0.175701	-0.207163	0.484591	0.979287	-0.176144	0.128658	0.64144	0.856666	-0.175699	-0.0185388	0.95275	0.984461	-0.175694	-0.0637349	0.788834	0.999801	-0.17597	-0.0838529	0.77685	0.906945
Lin7a|ENSMUSG00000019906	6.26863	0.0884902	0.0658997	0.729398	6.26858	0.163437	0.000756681	0.0112069	6.26863	0.286449	2.21917e-06	8.71991e-05	6.26861	-0.0413038	0.270329	0.999801	6.26853	0.245497	1.05455e-05	0.000251065
Ppp1r12a|ENSMUSG00000019907	6.24026	0.0124748	0.791653	0.994794	6.24014	-0.0502569	0.256159	0.569865	6.24029	-0.024756	0.623149	0.844069	6.2403	-0.0165803	0.661055	0.999801	6.24027	-0.0448042	0.339341	0.610689
Pawr|ENSMUSG00000035873	0.214672	0.168426	0.448319	0.977718	0.214438	0.297845	0.149507	0.427334	0.214699	0.495259	0.0414602	0.189767	0.21468	-0.041945	0.807732	0.999801	0.21446	0.465622	0.040679	0.167166
Syt1|ENSMUSG00000035864	9.95092	0.0275801	0.551178	0.984789	9.95086	-0.117414	0.00671712	0.056943	9.95095	-0.062006	0.207311	0.501717	9.95097	-0.0331135	0.363767	0.999801	9.95101	-0.0956468	0.0382769	0.16029
Nav3|ENSMUSG00000020181	5.41967	0.0666806	0.216744	0.910553	5.41962	0.0175306	0.727724	0.898942	5.41969	0.121742	0.0368171	0.176089	5.4197	-0.0423143	0.317194	0.999801	5.41965	0.0807521	0.132855	0.36272
E2f7|ENSMUSG00000020185	-2.00232	-0.704268	0.155805	0.867757	NA	NA	NA	NA	-2.0023	-0.318989	0.539071	0.79525	NA	NA	NA	NA	-2.00254	-0.40586	0.397432	0.663906
Csrp2|ENSMUSG00000020186	1.21932	0.0555772	0.710704	0.991393	1.21901	-0.202253	0.148478	0.426363	1.21934	-0.0257402	0.872767	0.958133	1.21935	-0.128082	0.296563	0.999801	1.21918	-0.144327	0.333824	0.605644
Zdhhc17|ENSMUSG00000035798	7.47706	-0.0252674	0.572686	0.984789	7.47696	-0.0453045	0.280533	0.595849	7.47708	-0.0651803	0.16913	0.448675	7.47709	-0.0111202	0.753295	0.999801	7.47707	-0.0754541	0.0908474	0.286205
Gm5428|ENSMUSG00000091086	5.07746	0.0867073	0.138603	0.854423	5.07743	-0.0209711	0.702287	0.887874	5.07746	0.0348474	0.575394	0.815287	5.07746	0.0272798	0.554473	0.999801	5.07742	0.0634213	0.277345	0.548529
Osbpl8|ENSMUSG00000020189	8.728	-0.163791	0.022818	0.529746	8.72793	-0.192011	0.0053123	0.048071	8.72804	-0.336409	6.23864e-05	0.00133935	8.72808	-0.0219073	0.686116	0.999801	8.7282	-0.367424	8.87612e-06	0.000218
Bbs10|ENSMUSG00000035759	2.48513	0.00658169	0.95186	0.999369	2.48517	-0.12961	0.205142	0.508562	2.48513	-0.00354921	0.975579	0.9922	2.48515	-0.124485	0.15375	0.999801	2.48519	-0.128757	0.244726	0.513601
Nap1l1|ENSMUSG00000058799	6.76357	-0.115585	0.0111442	0.407336	6.76359	0.0620302	0.144236	0.41988	6.76358	-0.0633064	0.191072	0.479275	6.76359	0.00357525	0.921079	0.999801	6.76365	-0.0564724	0.212234	0.474117
Phlda1|ENSMUSG00000020205	4.14254	0.0183667	0.809948	0.994968	4.14255	-0.0669661	0.35051	0.66256	4.14259	-0.102631	0.212189	0.50885	4.14261	0.05348	0.384026	0.999801	4.14269	-0.0551417	0.466587	0.718232
Krr1|ENSMUSG00000063334	4.27926	-0.00596183	0.932616	0.997501	4.27908	-0.116441	0.0757694	0.288173	4.2793	-0.109788	0.144865	0.41124	4.27932	-0.0185969	0.739899	0.999801	4.27926	-0.125796	0.0731516	0.247909
Glipr1|ENSMUSG00000056888	-2.23157	0.19111	0.672669	0.991393	-2.23161	0.252204	0.526039	0.791621	NA	NA	NA	NA	NA	NA	NA	NA	NA	NA	NA	NA
Kcnc2|ENSMUSG00000035681	4.38204	0.0798859	0.629989	0.990814	4.38208	-0.264918	0.0978081	0.336105	4.38205	-0.0889091	0.615242	0.838664	4.38205	-0.086266	0.537148	0.999801	4.38247	-0.180718	0.268137	0.539272
Atxn7l3b|ENSMUSG00000074748	7.73214	0.00948337	0.832222	0.994968	7.73211	0.00360123	0.931358	0.978448	7.73215	0.0087687	0.853591	0.950829	7.73216	-0.00165076	0.962753	0.999801	7.73217	0.00837345	0.851242	0.940893
Trhde|ENSMUSG00000050663	2.15051	0.182833	0.136341	0.854025	2.15041	0.256447	0.0267174	0.14831	2.15057	0.355176	0.00908429	0.0655103	2.15058	0.0787155	0.400139	0.999801	2.15084	0.437022	0.000937738	0.00956426
Tph2|ENSMUSG00000006764	0.473458	-0.0619458	0.79371	0.994794	0.473412	-0.25527	0.263634	0.577675	0.473481	-0.156258	0.528294	0.788421	0.473527	-0.158149	0.419009	0.999801	0.473751	-0.330765	0.157575	0.400952
Tbc1d15|ENSMUSG00000020130	5.79136	-0.106882	0.0343334	0.597761	5.79126	-0.0449544	0.339835	0.653309	5.7914	-0.141534	0.0083958	0.0615213	5.79143	-0.0159405	0.689638	0.999801	5.79145	-0.156808	0.00172286	0.0155085
Rab21|ENSMUSG00000020132	5.89581	0.0323165	0.515083	0.984789	5.89571	0.0447092	0.335502	0.648463	5.89581	0.0273409	0.60221	0.830966	5.89581	0.0460541	0.236651	0.999801	5.89575	0.0711816	0.150373	0.390176
Tmem19|ENSMUSG00000069520	5.05388	0.00591648	0.919879	0.997501	5.05385	-0.022318	0.684468	0.878153	5.05388	0.0394591	0.52658	0.787926	5.05389	-0.0601326	0.194468	0.999801	5.0539	-0.0222824	0.703122	0.870529
Thap2|ENSMUSG00000020137	4.15822	0.057872	0.423629	0.977718	4.15818	-0.000610063	0.9928	0.997737	4.15825	0.0446502	0.56118	0.807989	4.15826	0.00976678	0.864283	0.999801	4.15823	0.054389	0.450776	0.706926
Zfc3h1|ENSMUSG00000034163	6.4934	0.0247465	0.594171	0.987824	6.4934	-0.0391402	0.367245	0.678218	6.49338	-0.02239	0.647945	0.858033	6.49338	0.00356857	0.921879	0.999801	6.49339	-0.0192572	0.675754	0.856661
A930009A15Rik|ENSMUSG00000092210	-1.59313	0.472275	0.180429	0.882756	-1.59304	0.0223042	0.943465	0.982041	-1.59315	1.08941	0.00553203	0.0453121	-1.59316	-0.586852	0.0314725	0.907182	-1.59324	0.490649	0.174201	0.424126
Lgr5|ENSMUSG00000020140	1.94156	-0.0542966	0.664746	0.991393	1.94167	0.078633	0.506132	0.779905	1.94155	-0.0102481	0.938388	0.981775	1.94155	0.0358235	0.715605	0.999801	1.94167	0.0221004	0.857039	0.943045
Ptprr|ENSMUSG00000020151	3.87284	0.0673084	0.381446	0.971278	3.87275	0.147407	0.0390443	0.190237	3.87283	0.237145	0.00384223	0.0347423	3.87281	-0.028273	0.6424	0.999801	3.87264	0.209926	0.00598321	0.0407478
Ptprb|ENSMUSG00000020154	5.80039	0.00752946	0.908453	0.997217	5.80046	-0.0729373	0.230252	0.539727	5.80037	-0.112212	0.111347	0.353698	5.80037	0.0439092	0.387013	0.999801	5.80044	-0.0734232	0.263258	0.534738
4933400F03Rik|ENSMUSG00000085837	-0.593313	-0.319943	0.228607	0.919092	-0.593332	-0.03191	0.894887	0.964237	-0.593323	-0.356939	0.213627	0.510226	-0.593334	0.00354451	0.986208	0.999801	-0.593442	-0.345862	0.197006	0.454535
Kcnmb4|ENSMUSG00000054934	4.6877	-0.0049541	0.938098	0.997501	4.68785	0.0477946	0.426209	0.723906	4.68765	0.156812	0.0210339	0.120077	4.68764	-0.115116	0.0237255	0.836095	4.68769	0.0420672	0.507268	0.750842
5330438D12Rik|ENSMUSG00000052291	2.2141	0.0986016	0.404865	0.97653	2.2141	-0.109261	0.324153	0.637594	2.21408	-0.0732394	0.549872	0.801396	2.21407	0.0611715	0.506561	0.999801	2.21408	-0.0151865	0.895346	0.958543
Cnot2|ENSMUSG00000020166	6.14363	-0.0152368	0.749918	0.991393	6.14359	-0.0315002	0.481275	0.762809	6.14364	-0.0632188	0.213756	0.510322	6.14365	0.0124277	0.742976	0.999801	6.14367	-0.0518126	0.274759	0.546577
Rab3ip|ENSMUSG00000064181	5.17361	-0.136111	0.0172764	0.500628	5.17373	0.146275	0.00614919	0.0534746	5.1736	0.0307397	0.61059	0.835781	5.17359	-0.0211156	0.638067	0.999801	5.17377	0.000154367	0.997827	0.999054
Cct2|ENSMUSG00000034024	7.17806	0.00141612	0.974817	0.999487	7.17799	0.0895165	0.0326762	0.169449	7.17806	0.0733177	0.124743	0.376561	7.17806	0.0134342	0.705338	0.999801	7.17802	0.0841983	0.0604272	0.218844
Frs2|ENSMUSG00000020170	6.11734	0.0566663	0.236841	0.92486	6.11735	0.0363563	0.420983	0.720991	6.11734	0.0529465	0.298047	0.610783	6.11735	0.037822	0.319223	0.999801	6.11736	0.0906615	0.057922	0.213296
Yeats4|ENSMUSG00000020171	4.51118	0.000787968	0.990549	0.999487	4.51111	-0.0876716	0.160922	0.445062	4.51119	-0.0281244	0.691188	0.879559	4.5112	-0.0607747	0.253109	0.999801	4.51122	-0.090277	0.16955	0.418283
Lyz2|ENSMUSG00000069516	3.31429	-0.00138829	0.992397	0.999487	3.31434	-0.129109	0.340684	0.654274	3.31429	-0.150905	0.340326	0.65004	3.3143	0.0188837	0.872565	0.999801	3.3143	-0.139537	0.346064	0.616211
Lyz1|ENSMUSG00000069515	-1.96706	0.0943512	0.774064	0.99203	-1.96712	-0.225295	0.453361	0.7438	-1.96706	-0.0804032	0.819942	0.936983	-1.96705	-0.0521784	0.84286	0.999801	-1.96706	-0.137873	0.676693	0.857108
Cpsf6|ENSMUSG00000055531	7.27061	-0.0195802	0.662725	0.991393	7.27059	0.0331553	0.433575	0.73121	7.2706	0.0321767	0.497988	0.770202	7.2706	-0.0231696	0.511137	0.999801	7.27059	0.0106784	0.810811	0.92234
Cpm|ENSMUSG00000020183	3.73449	-0.0145633	0.888375	0.997217	3.73446	0.156997	0.122309	0.383262	3.73448	0.100075	0.358798	0.664532	3.73448	0.0408607	0.623082	0.999801	3.73444	0.14817	0.160568	0.405129
Mdm2|ENSMUSG00000020184	5.95616	0.0325817	0.507113	0.984789	5.95618	0.0206264	0.655254	0.863632	5.95616	0.014234	0.783976	0.921733	5.95617	0.0364564	0.345079	0.999801	5.95622	0.0521587	0.286849	0.559046
Slc35e3|ENSMUSG00000060181	4.30036	0.0550306	0.431412	0.977718	4.30034	0.0102769	0.874708	0.957289	4.30037	0.0462637	0.536196	0.793959	4.30037	0.0139742	0.801608	0.999801	4.30038	0.0607704	0.382511	0.651424
Nup107|ENSMUSG00000052798	4.26089	0.110375	0.121059	0.84181	4.26067	-0.118221	0.0724843	0.281147	4.26093	-0.0452251	0.55393	0.803619	4.26095	0.0301694	0.592667	0.999801	4.26081	-0.0122391	0.863833	0.946016
Rap1b|ENSMUSG00000052681	5.94386	0.0112184	0.82022	0.994968	5.94387	0.106167	0.0211979	0.126811	5.94385	0.132389	0.011631	0.0786977	5.94385	-0.0198904	0.607348	0.999801	5.9439	0.112846	0.0215685	0.106282
Mdm1|ENSMUSG00000020212	2.97638	0.0844457	0.36375	0.970269	2.9764	-0.0697797	0.425187	0.723519	2.97639	0.045768	0.642813	0.855221	2.9764	-0.0335592	0.652218	0.999801	2.97647	0.00999636	0.91345	0.968042
Dyrk2|ENSMUSG00000028630	2.8872	0.0886933	0.363204	0.970269	2.88729	0.286688	0.00157623	0.0196599	2.88717	0.443553	1.90886e-05	0.000500965	2.88716	-0.0711274	0.350725	0.999801	2.88713	0.366638	0.000163891	0.00234603
Cand1|ENSMUSG00000020114	7.32011	0.0292268	0.512926	0.984789	7.32004	0.0171942	0.681314	0.876041	7.32012	0.0397444	0.40278	0.70048	7.32013	0.00308357	0.930738	0.999801	7.3201	0.0402558	0.366747	0.636271
Grip1|ENSMUSG00000034813	4.74478	0.0208029	0.742075	0.991393	4.74476	0.186518	0.00162651	0.0201118	4.74478	0.131938	0.0496137	0.213503	4.74476	0.0702205	0.160619	0.999801	4.7447	0.200925	0.00136022	0.0129413
Helb|ENSMUSG00000020228	3.41946	0.0042204	0.960544	0.999487	3.41944	0.0974322	0.216188	0.521823	3.41943	0.143442	0.11072	0.352705	3.41943	-0.050571	0.446113	0.999801	3.41935	0.0965765	0.251199	0.521355
Irak3|ENSMUSG00000020227	1.5268	0.171095	0.278551	0.942445	1.52667	0.00388976	0.978673	0.994248	1.52682	0.457836	0.00982062	0.0692752	1.52684	-0.287556	0.0258546	0.852655	1.5267	0.165903	0.29839	0.57029
Tmbim4|ENSMUSG00000020225	4.99684	-0.00724454	0.903659	0.997217	4.99677	-0.00976532	0.861309	0.952693	4.99684	-0.0406323	0.520187	0.783445	4.99685	0.0193274	0.681537	0.999801	4.99688	-0.0242847	0.681622	0.859689
Llph|ENSMUSG00000020224	2.01539	-0.226442	0.0607068	0.711178	2.0154	-0.0938305	0.411801	0.71241	2.01539	-0.245562	0.0554406	0.229811	2.01541	-0.0733839	0.448525	0.999801	2.0155	-0.323721	0.00722555	0.0471121
Gm15910|ENSMUSG00000087480	-1.29541	-0.200835	0.530001	0.984789	-1.29518	0.509296	0.0840576	0.307037	-1.29545	0.0971854	0.765096	0.914315	-1.29548	0.200988	0.395617	0.999801	-1.29536	0.291463	0.333372	0.6053
Msrb3|ENSMUSG00000051236	3.02608	0.0895352	0.341234	0.968085	3.02624	0.36514	2.46892e-05	0.000742621	3.02603	0.286044	0.00415076	0.0368068	3.02599	0.166304	0.0216486	0.811712	3.02603	0.449929	1.41681e-06	4.68835e-05
Lemd3|ENSMUSG00000048661	5.57515	0.012983	0.81108	0.994968	5.57512	0.0327021	0.522183	0.789897	5.57517	0.0431499	0.45714	0.742655	5.57517	0.000120811	0.997762	0.999801	5.57522	0.0419731	0.437371	0.695028
Wif1|ENSMUSG00000020218	-0.503605	-0.227725	0.480552	0.978767	-0.503485	0.217463	0.472269	0.757068	-0.503633	-0.175655	0.595437	0.826782	-0.503636	0.165123	0.498875	0.999801	-0.503402	-0.0191206	0.951765	0.981053
Tbc1d30|ENSMUSG00000052302	6.74297	-0.163847	0.00624921	0.30456	6.74299	-0.0896464	0.0952279	0.330053	6.74303	-0.277349	5.24285e-05	0.00117106	6.74307	0.0193218	0.662373	0.999801	6.74328	-0.260493	5.36989e-05	0.000938577
Gns|ENSMUSG00000034707	6.49023	0.0231485	0.617229	0.987917	6.49026	0.0497852	0.252829	0.566885	6.49022	0.0664449	0.17587	0.458248	6.49021	0.0035888	0.921723	0.999801	6.49022	0.069609	0.131575	0.360787
Rassf3|ENSMUSG00000025795	5.40713	-0.129335	0.0248223	0.544738	5.40734	0.242545	5.23516e-05	0.00135006	5.40708	0.198567	0.00206836	0.0215898	5.40707	-0.0915625	0.0410968	0.967681	5.40718	0.116274	0.0407471	0.167194
Tbk1|ENSMUSG00000020115	5.7128	-0.0476567	0.346587	0.969129	5.71279	0.0176717	0.712503	0.892768	5.71281	0.00114289	0.983044	0.994508	5.71282	-0.0341813	0.398073	0.999801	5.71283	-0.0310018	0.537755	0.769766
Xpot|ENSMUSG00000034667	6.50482	0.0850627	0.0653088	0.727308	6.50472	-0.0285807	0.507586	0.780744	6.50484	0.014059	0.774523	0.918025	6.50484	0.038296	0.296315	0.999801	6.50478	0.0522865	0.254816	0.525241
BC048403|ENSMUSG00000053684	3.77751	0.00174215	0.982163	0.999487	3.77742	-0.0403823	0.582674	0.825857	3.77751	0.0394547	0.631509	0.848151	3.77752	-0.0807846	0.19108	0.999801	3.77742	-0.0448143	0.562286	0.786171
Srgap1|ENSMUSG00000020121	6.84989	-0.0464495	0.429845	0.977718	6.84986	-0.0337426	0.536864	0.796325	6.8499	-0.16282	0.0120078	0.0805555	6.84993	0.0818325	0.0842888	0.999801	6.84999	-0.0917561	0.122422	0.345721
Tmem5|ENSMUSG00000034620	4.6146	-0.0795032	0.225759	0.916572	4.61455	0.199594	0.00116859	0.0157787	4.61458	0.12981	0.0612724	0.246066	4.61457	-0.0157522	0.759727	0.999801	4.61453	0.113784	0.0787673	0.260183
Ppm1h|ENSMUSG00000034613	3.44895	0.0891186	0.284673	0.943213	3.44898	0.0778511	0.317077	0.630738	3.44895	0.171303	0.0522865	0.221657	3.44895	-0.00433411	0.947989	0.999801	3.44893	0.157001	0.0567119	0.210335
Mon2|ENSMUSG00000034602	6.73139	0.0277065	0.543318	0.984789	6.7314	0.0511084	0.233795	0.544392	6.73139	0.0986477	0.0416336	0.190154	6.73139	-0.0231044	0.521076	0.999801	6.73139	0.0743743	0.101121	0.306619
Usp15|ENSMUSG00000020124	6.1094	-0.0110101	0.818747	0.994968	6.10931	-0.026895	0.549075	0.803404	6.10942	-0.0117168	0.819269	0.936957	6.10944	-0.0304207	0.424481	0.999801	6.10942	-0.0434208	0.365517	0.635168
Fam19a2|ENSMUSG00000044071	3.93285	0.0506193	0.570678	0.984789	3.93276	0.0645521	0.43822	0.733785	3.93286	0.229781	0.0202738	0.116986	3.93285	-0.124351	0.0783328	0.999801	3.93271	0.113768	0.204586	0.464868
Slc16a7|ENSMUSG00000020102	4.00445	-0.00861583	0.908478	0.997217	4.00435	-0.0474124	0.496231	0.773671	4.00447	0.0470727	0.55534	0.804749	4.00449	-0.108823	0.0647476	0.999801	4.00446	-0.0660254	0.376168	0.646057
Lrig3|ENSMUSG00000020105	1.61497	0.213984	0.137215	0.854025	1.61491	-0.0381566	0.771854	0.916207	1.61499	0.348866	0.0250858	0.136003	1.615	-0.177128	0.115914	0.999801	1.61506	0.176061	0.213859	0.47588
Xrcc6bp1|ENSMUSG00000025436	2.06301	0.0363471	0.774748	0.99203	2.06299	0.00879089	0.941216	0.981472	2.063	0.190701	0.167624	0.446198	2.063	-0.146541	0.152128	0.999801	2.06304	0.0388323	0.756858	0.896027
Ctdsp2|ENSMUSG00000078429	6.84508	-0.0306939	0.499499	0.982515	6.84516	0.0276253	0.517525	0.78701	6.84508	-0.0398566	0.405699	0.702793	6.84508	0.0350997	0.325413	0.999801	6.84518	-0.00764728	0.865457	0.94682
Avil|ENSMUSG00000025432	-1.13231	0.335323	0.226518	0.917403	-1.13215	0.185696	0.471924	0.756924	-1.13234	0.544092	0.0561837	0.231937	-1.13237	-0.017278	0.934745	0.999801	-1.13213	0.50619	0.0583605	0.214035
Tsfm|ENSMUSG00000040521	3.47371	0.0467825	0.574712	0.984789	3.47369	0.0134507	0.862289	0.952951	3.47371	0.0446331	0.616436	0.839332	3.47372	0.0123624	0.851141	0.999801	3.47376	0.0533933	0.522508	0.760208
Mettl1|ENSMUSG00000006732	2.88676	-0.152966	0.110459	0.828627	2.88672	0.0785961	0.383746	0.692726	2.88678	-0.150841	0.137651	0.398632	2.88679	0.0722112	0.343384	0.999801	2.88678	-0.072681	0.442403	0.699772
Cyp27b1|ENSMUSG00000006724	-0.508373	-0.276448	0.250086	0.930311	-0.508234	0.0665691	0.770179	0.915339	-0.508375	-0.296344	0.236997	0.540199	-0.508366	0.0821938	0.662397	0.999801	-0.508174	-0.219878	0.341111	0.611929
March9|ENSMUSG00000040502	4.55428	0.0156526	0.81539	0.994968	4.55448	0.373279	1.37559e-07	1.05945e-05	4.5542	0.492728	6.48014e-09	7.55223e-07	4.55417	-0.105796	0.0414495	0.967681	4.55417	0.383711	2.41841e-07	1.09458e-05
Cdk4|ENSMUSG00000006728	5.35504	-0.0330094	0.548168	0.984789	5.35501	-0.0360408	0.480933	0.762699	5.35504	-0.0343433	0.554974	0.804744	5.35505	-0.0387075	0.366337	0.999801	5.35508	-0.0749905	0.169453	0.418203
Tspan31|ENSMUSG00000006736	5.89899	0.0041893	0.932674	0.997501	5.89896	0.0464129	0.315593	0.629171	5.89898	0.0262886	0.616154	0.839332	5.89899	0.0208793	0.593305	0.999801	5.89902	0.0453577	0.356085	0.625583
Agap2|ENSMUSG00000025422	10.0974	-0.0293693	0.525767	0.984789	10.0975	-0.127817	0.00327309	0.0339259	10.0974	-0.101887	0.0382482	0.180068	10.0974	-0.0560211	0.124998	0.999801	10.0975	-0.163207	0.000417582	0.00502333
Os9|ENSMUSG00000040462	7.12728	0.0342842	0.445067	0.977718	7.12731	0.082521	0.050967	0.226601	7.12726	0.0902326	0.0581185	0.237238	7.12725	0.0244754	0.490645	0.999801	7.12725	0.113718	0.0112086	0.0657848
B4galnt1|ENSMUSG00000006731	6.47122	-0.0314127	0.499685	0.982515	6.47121	-0.0639186	0.148106	0.426197	6.47123	-0.173709	0.00111237	0.0133828	6.47125	0.0765306	0.0431942	0.967681	6.47131	-0.104586	0.0294928	0.133127
Slc26a10|ENSMUSG00000040441	2.80847	-0.203004	0.0383143	0.615196	2.80852	-0.367354	6.6015e-05	0.00163138	2.80849	-0.587766	2.22758e-07	1.31596e-05	2.80855	0.0178238	0.821255	0.999801	2.80863	-0.578015	1.02099e-07	5.52303e-06
Arhgef25|ENSMUSG00000019467	5.52083	0.172612	0.00174775	0.174156	5.5209	0.0755022	0.12628	0.389802	5.52082	0.129338	0.0209779	0.119798	5.52081	0.119142	0.00622164	0.528814	5.52082	0.242382	3.61254e-05	0.000692296
F420014N23Rik|ENSMUSG00000097331	-2.16086	0.111556	0.793063	0.994794	NA	NA	NA	NA	-2.16085	0.256811	0.566854	0.811103	NA	NA	NA	NA	-2.16103	0.128793	0.754272	0.894614
Dtx3|ENSMUSG00000040415	7.52798	0.000540306	0.990343	0.999487	7.52803	-0.0510239	0.223291	0.530365	7.52797	-0.0769293	0.102975	0.337446	7.52797	0.0246813	0.485312	0.999801	7.52802	-0.0555673	0.209444	0.471224
Pip4k2c|ENSMUSG00000025417	6.29846	0.0263636	0.57523	0.984789	6.29835	-0.263129	2.02501e-09	3.69995e-07	6.29852	-0.3044	1.12394e-09	1.75048e-07	6.29855	0.0643556	0.0864551	0.999801	6.29863	-0.241628	2.2428e-07	1.02784e-05
Kif5a|ENSMUSG00000074657	11.9998	0.0988263	0.0387162	0.615196	11.9999	0.0193891	0.666815	0.869265	11.9998	0.109008	0.030249	0.154602	11.9998	0.00858401	0.818951	0.999801	11.9999	0.114254	0.0161642	0.0861502
Dctn2|ENSMUSG00000025410	7.169	0.0549207	0.221544	0.912571	7.16895	0.00944314	0.822424	0.937509	7.169	0.0289105	0.543688	0.797796	7.16901	0.0325766	0.357842	0.999801	7.16899	0.0581146	0.194827	0.451392
Mbd6|ENSMUSG00000025409	5.56932	-0.0921162	0.0803144	0.763878	5.56937	-0.148819	0.0043349	0.0415469	5.56931	-0.30387	3.52913e-06	0.000126224	5.56932	0.061182	0.141046	0.999801	5.56935	-0.249296	3.0688e-05	0.000604355
Gm20492|ENSMUSG00000092593	-1.60594	0.144841	0.646572	0.991393	-1.60601	-0.207402	0.481491	0.762809	-1.60595	0.10764	0.745838	0.905264	-1.60595	-0.162158	0.502314	0.999801	-1.60602	-0.0757845	0.811367	0.922605
Gm4189|ENSMUSG00000092384	-0.449174	-0.121791	0.608058	0.987824	-0.449153	-0.184346	0.404684	0.708308	-0.449172	-0.314054	0.213437	0.510031	-0.449161	0.0111762	0.952498	0.999801	-0.449101	-0.30634	0.194341	0.450784
Ddit3|ENSMUSG00000025408	4.47287	-0.137372	0.0428675	0.633368	4.47297	0.205387	0.00120867	0.0161548	4.47282	0.0431943	0.550202	0.801467	4.47281	0.0263576	0.621022	0.999801	4.47288	0.0598276	0.376629	0.646223
Mars|ENSMUSG00000040354	5.36834	-0.0134395	0.805156	0.994794	5.36835	0.0126301	0.802506	0.929716	5.36833	-0.000655667	0.990941	0.996996	5.36834	-0.00313589	0.941644	0.999801	5.36835	-0.00740631	0.891102	0.957054
Arhgap9|ENSMUSG00000040345	-0.388727	0.515445	0.0331249	0.589085	-0.388899	-0.192706	0.379048	0.687889	-0.388749	0.638978	0.0127821	0.0845492	-0.388771	-0.312802	0.0957937	0.999801	-0.388931	0.325679	0.161745	0.406979
Gli1|ENSMUSG00000025407	-0.111192	0.153635	0.497159	0.982515	-0.111352	0.0135187	0.94837	0.984006	-0.111213	0.286457	0.226902	0.527873	-0.111255	-0.122731	0.470973	0.999801	-0.111283	0.173522	0.436028	0.694056
R3hdm2|ENSMUSG00000025404	7.51587	0.0491131	0.272327	0.939497	7.51589	0.010683	0.799171	0.928136	7.51586	0.0263089	0.578902	0.817497	7.51586	0.0341256	0.33307	0.999801	7.51591	0.0495468	0.266142	0.537393
Stac3|ENSMUSG00000040287	0.662504	-0.0720238	0.688334	0.991393	0.662791	0.34199	0.0430318	0.203097	0.662468	0.309632	0.10155	0.335149	0.662453	-0.0327606	0.815632	0.999801	0.66267	0.262371	0.134051	0.364302
Ndufa4l2|ENSMUSG00000040280	0.866577	0.103374	0.538708	0.984789	0.866552	-0.192255	0.215661	0.521392	0.866584	-0.183826	0.308809	0.621491	0.866585	0.0879597	0.505116	0.999801	0.866678	-0.0870313	0.606009	0.815113
Shmt2|ENSMUSG00000025403	3.89004	0.071172	0.350547	0.970269	3.88994	-0.106071	0.138329	0.410399	3.89005	-0.0550663	0.495311	0.768142	3.89006	0.0168279	0.780398	0.999801	3.89002	-0.0365724	0.628699	0.828214
Nxph4|ENSMUSG00000040258	0.744166	-0.147141	0.482742	0.978767	0.744222	0.0245283	0.900404	0.96592	0.744171	-0.266367	0.232423	0.535197	0.744173	0.143293	0.386328	0.999801	0.744333	-0.129463	0.536156	0.768699
Lrp1|ENSMUSG00000040249	8.90385	0.0354179	0.42894	0.977718	8.90395	-0.0404967	0.340924	0.654274	8.90384	0.00842725	0.86002	0.952889	8.90384	-0.0137207	0.702899	0.999801	8.90386	-0.00915824	0.838275	0.935711
Stat6|ENSMUSG00000002147	4.56667	0.00916311	0.891616	0.997217	4.56692	0.450717	4.46711e-08	4.19249e-06	4.5666	0.418024	1.76973e-06	7.37688e-05	4.56655	0.0393409	0.455371	0.999801	4.56663	0.453099	1.33958e-07	6.83548e-06
Nab2|ENSMUSG00000025402	5.51195	-0.071187	0.30187	0.946602	5.51205	0.00782427	0.90248	0.966929	5.51197	-0.104334	0.155835	0.429946	5.512	0.035668	0.51122	0.999801	5.51217	-0.0699351	0.306969	0.580138
Tmem194|ENSMUSG00000040195	3.21767	0.0490977	0.578437	0.985645	3.2176	-0.166087	0.0429849	0.203001	3.21769	-0.0766961	0.412426	0.707606	3.21771	-0.049181	0.482646	0.999801	3.21771	-0.120742	0.165274	0.411896
Myo1a|ENSMUSG00000025401	0.0900962	-0.0874698	0.681925	0.991393	0.0903002	-0.115766	0.567107	0.815478	0.0900941	-0.404865	0.0820415	0.295529	0.0901051	0.206604	0.231418	0.999801	0.0902703	-0.203951	0.33927	0.610689
Tac2|ENSMUSG00000025400	-1.41805	-0.333585	0.315304	0.952987	-1.41814	-0.121248	0.684474	0.878153	-1.41803	0.219363	0.545637	0.799006	-1.41802	-0.681667	0.015732	0.745899	-1.41808	-0.460964	0.173562	0.423218
Zbtb39|ENSMUSG00000044617	3.9114	0.00923252	0.903488	0.997217	3.91138	0.00208795	0.976674	0.994038	3.9114	0.0517685	0.518409	0.783047	3.91141	-0.0445502	0.459054	0.999801	3.91139	0.00558404	0.940767	0.978223
Gpr182|ENSMUSG00000058396	-0.778224	0.28846	0.266215	0.938319	-0.778188	-0.300231	0.218311	0.52433	-0.778215	-0.469269	0.0988115	0.329798	-0.778199	0.464641	0.0340402	0.922451	-0.778125	-0.0170499	0.947602	0.980078
RP23-386P10.11|ENSMUSG00000099009	-1.44977	0.109061	0.712055	0.991393	-1.44998	0.120919	0.659284	0.865204	-1.44976	0.249637	0.431528	0.725082	-1.44976	-0.0276796	0.905701	0.999801	-1.4499	0.234412	0.430321	0.690176
Rdh9|ENSMUSG00000056148	-1.38455	0.10824	0.72535	0.991393	-1.3848	0.00390301	0.988411	0.996682	-1.38454	0.250303	0.448678	0.736919	-1.38454	-0.149544	0.536644	0.999801	-1.38469	0.116898	0.706844	0.871642
Gm15900|ENSMUSG00000090036	-0.212764	0.169961	0.438756	0.977718	-0.21274	-0.149573	0.468322	0.754157	-0.212764	-0.0544555	0.812868	0.933506	-0.212763	0.0769923	0.663139	0.999801	-0.212708	0.0185652	0.931812	0.97493
Prim1|ENSMUSG00000025395	2.60618	0.185331	0.074282	0.749335	2.60589	-0.0254638	0.791604	0.925523	2.60621	0.103507	0.352779	0.660021	2.60621	0.0512798	0.533128	0.999801	2.606	0.158374	0.125017	0.350214
Naca|ENSMUSG00000061315	4.6974	0.0399337	0.53433	0.984789	4.69735	-0.0572827	0.337311	0.650789	4.69741	0.00379497	0.955651	0.985205	4.69742	-0.0257047	0.610939	0.999801	4.69739	-0.0207911	0.74535	0.890227
Ptges3|ENSMUSG00000071072	5.56716	0.108877	0.0380698	0.614628	5.56717	0.145152	0.00300211	0.0316715	5.56715	0.182532	0.00110215	0.0133065	5.56714	0.0682035	0.0979065	0.999801	5.56716	0.246617	2.47123e-06	7.50324e-05
Atp5b|ENSMUSG00000025393	10.215	0.0204187	0.660359	0.991393	10.2149	-0.12082	0.0053688	0.0485056	10.215	-0.13151	0.00750057	0.0568583	10.215	0.0279337	0.446304	0.999801	10.215	-0.105308	0.0229944	0.111036
Baz2a|ENSMUSG00000040054	6.05605	0.0365246	0.449454	0.977718	6.05604	-0.0164082	0.717585	0.894638	6.05606	0.00818381	0.873308	0.958289	6.05607	0.0108429	0.777154	0.999801	6.05609	0.0139229	0.772237	0.904586
Rbms2|ENSMUSG00000040043	3.49708	0.127567	0.125368	0.845387	3.49717	0.104837	0.176399	0.469131	3.49706	0.261536	0.00302616	0.0288822	3.49705	-0.0298452	0.648545	0.999801	3.4971	0.226924	0.00625001	0.0420455
Gls2|ENSMUSG00000044005	3.80396	0.081903	0.290932	0.943476	3.80392	-0.224526	0.00188956	0.0225839	3.80399	-0.203764	0.0136311	0.0885916	3.80401	0.0601814	0.33087	0.999801	3.80411	-0.148321	0.0549573	0.205973
Spryd4|ENSMUSG00000051346	2.67941	0.0956819	0.345077	0.969077	2.67922	-0.00530807	0.955265	0.986274	2.67943	0.0060137	0.955827	0.985205	2.67943	0.0824777	0.313838	0.999801	2.67936	0.0821985	0.415624	0.677539
Timeless|ENSMUSG00000039994	1.93881	0.0499323	0.69178	0.991393	1.93887	0.145969	0.213512	0.518624	1.93878	0.228263	0.0852586	0.302627	1.93877	-0.0376043	0.70264	0.999801	1.93883	0.190116	0.125895	0.351641
Gm26847|ENSMUSG00000097526	-1.85705	-0.083754	0.813675	0.994968	-1.8572	-0.34715	0.300638	0.615429	-1.85705	-0.311631	0.408685	0.705309	-1.85704	-0.123358	0.659276	0.999801	-1.85712	-0.446779	0.217844	0.480441
Stat2|ENSMUSG00000040033	4.53364	0.0859049	0.195354	0.896661	4.5337	-0.001888	0.975774	0.993572	4.53362	0.0884617	0.206368	0.500708	4.53362	-0.00844303	0.87203	0.999801	4.53365	0.0800583	0.223433	0.487451
Pan2|ENSMUSG00000005682	4.60125	-0.0406769	0.535122	0.984789	4.60122	-0.182841	0.00513619	0.0468476	4.60128	-0.298478	0.000135704	0.00257177	4.6013	0.0704682	0.175963	0.999801	4.60131	-0.224212	0.00156969	0.0143488
Cnpy2|ENSMUSG00000025381	4.6828	0.0235481	0.714019	0.991393	4.68274	0.0889708	0.138411	0.4105	4.68279	0.110123	0.10609	0.343838	4.68279	2.65323e-05	0.999583	0.999801	4.68276	0.106901	0.0941337	0.293047
Cs|ENSMUSG00000005683	8.04722	0.037579	0.400542	0.975614	8.04722	0.0167065	0.69032	0.880527	8.04721	0.0445092	0.347286	0.656192	8.04721	0.00746765	0.832406	0.999801	8.04722	0.0493992	0.268606	0.539484
Coq10a|ENSMUSG00000039914	4.74162	0.0224085	0.722538	0.991393	4.74149	-0.102717	0.0798339	0.297467	4.74163	-0.0765887	0.255154	0.562949	4.74164	-0.00894529	0.858497	0.999801	4.7416	-0.0823486	0.191197	0.446592
Ankrd52|ENSMUSG00000014498	6.12598	0.0677288	0.15641	0.869186	6.12611	0.0174687	0.697806	0.885338	6.12597	0.0626649	0.218738	0.517162	6.12597	0.0223547	0.556842	0.999801	6.12608	0.0799493	0.0929306	0.290678
Slc39a5|ENSMUSG00000039878	-0.0558873	-0.0835761	0.741963	0.991393	-0.0554448	0.898707	0.000431723	0.00719887	-0.0560018	0.903492	0.00140341	0.016061	-0.0560584	-0.0889563	0.612854	0.999801	-0.0558429	0.804827	0.00246026	0.0204451
Nabp2|ENSMUSG00000025374	5.53902	0.0283417	0.588609	0.987824	5.53899	-0.00176757	0.971237	0.991901	5.53901	0.0106692	0.848374	0.949346	5.53902	0.0140724	0.73488	0.999801	5.539	0.0211562	0.685842	0.862019
Rnf41|ENSMUSG00000025373	6.01107	0.0352055	0.467416	0.978767	6.01112	0.0973296	0.0325911	0.169058	6.01105	0.111516	0.0310544	0.157477	6.01105	0.0194662	0.613965	0.999801	6.01107	0.127814	0.0079743	0.0505611
Smarcc2|ENSMUSG00000025369	7.99781	-0.0152247	0.733169	0.991393	7.99783	-0.0544025	0.195599	0.496037	7.99781	-0.0799507	0.0908192	0.313787	7.99782	0.00817095	0.816588	0.999801	7.99785	-0.0734116	0.0995362	0.303401
Myl6|ENSMUSG00000090841	4.74014	0.00547579	0.931162	0.997501	4.74012	-0.00531467	0.928469	0.976692	4.74014	0.000365321	0.99567	0.998526	4.74015	-0.00480403	0.923421	0.999801	4.74015	-0.0023596	0.970118	0.989428
Myl6b|ENSMUSG00000039824	2.63398	0.0628886	0.53658	0.984789	2.63383	-0.27777	0.00351892	0.0356143	2.63402	-0.290688	0.00717238	0.054911	2.63405	0.0782366	0.343832	0.999801	2.63402	-0.220255	0.0287582	0.130882
A430046D13Rik|ENSMUSG00000097353	3.19164	-0.0073701	0.934012	0.997501	3.19163	0.0249884	0.762059	0.912027	3.19162	0.0227453	0.809473	0.932232	3.19162	-0.0104624	0.881117	0.999801	3.19161	0.0128276	0.883845	0.954043
Esyt1|ENSMUSG00000025366	2.90137	-0.00463312	0.961796	0.999487	2.90146	0.144767	0.111981	0.365365	2.90132	0.140632	0.164362	0.441413	2.9013	-0.00245445	0.97395	0.999801	2.90135	0.133394	0.161886	0.407134
Zc3h10|ENSMUSG00000039810	3.82559	-0.021665	0.778203	0.99203	3.82561	0.038603	0.593269	0.830601	3.82559	-0.0224977	0.780909	0.920579	3.8256	0.037496	0.540009	0.999801	3.82565	0.0119117	0.875514	0.951136
Rpl41|ENSMUSG00000093674	7.0334	0.0663971	0.141888	0.856329	7.03336	0.0200495	0.637006	0.854044	7.03337	0.0694572	0.145311	0.411958	7.03337	0.0148221	0.675464	0.999801	7.03331	0.0822644	0.0679288	0.236263
Pa2g4|ENSMUSG00000025364	5.92168	0.0201915	0.682086	0.991393	5.92162	0.112424	0.0149314	0.0999403	5.92167	0.115296	0.0273116	0.14437	5.92167	0.0124027	0.749668	0.999801	5.92163	0.128332	0.0087368	0.0543565
Erbb3|ENSMUSG00000018166	4.6235	-0.0293635	0.724123	0.991393	4.62364	0.0674708	0.396366	0.702453	4.6235	0.0160305	0.856716	0.951339	4.62349	0.0219599	0.736205	0.999801	4.62377	0.0326856	0.689984	0.863919
Rps26|ENSMUSG00000025362	4.84965	0.0673045	0.286436	0.943213	4.84963	-0.0643076	0.271419	0.586958	4.84963	0.0162573	0.806842	0.931018	4.84964	-0.0156161	0.752074	0.999801	4.84964	0.00164756	0.978789	0.992963
Ikzf4|ENSMUSG00000002578	4.04767	-0.041048	0.585165	0.986707	4.04778	0.242015	0.000501835	0.00813115	4.0476	0.28217	0.000365662	0.00560333	4.04758	-0.0864649	0.134185	0.999801	4.04751	0.192671	0.00975867	0.0589868
Gm26876|ENSMUSG00000097372	-1.19459	-0.0780872	0.828412	0.994968	-1.19473	0.744156	0.02697	0.149278	-1.19465	0.601775	0.106278	0.343963	-1.19469	0.0603452	0.819476	0.999801	-1.19507	0.680577	0.0523388	0.199216
Suox|ENSMUSG00000049858	3.82729	0.0675843	0.383369	0.971829	3.82728	-0.00543705	0.939969	0.980973	3.8273	0.0867273	0.29066	0.602576	3.82731	-0.0250972	0.682219	0.999801	3.82731	0.0547164	0.478424	0.727921
Rab5b|ENSMUSG00000000711	7.0024	0.0028414	0.94973	0.998834	7.00236	-0.0142883	0.733994	0.901886	7.00241	-0.0259798	0.586861	0.821346	7.00241	0.0099516	0.779758	0.999801	7.00241	-0.0164647	0.713768	0.875245
Cdk2|ENSMUSG00000025358	1.35192	-0.0306705	0.836091	0.994968	1.35191	0.0358551	0.791584	0.925523	1.35193	-0.00101509	0.9949	0.998104	1.35192	-0.007216	0.949896	0.999801	1.35191	-0.000707147	0.996169	0.998505
Pmel|ENSMUSG00000025359	-0.811708	-0.236659	0.346754	0.969129	-0.811752	-0.187697	0.433109	0.730783	-0.811713	0.0764759	0.772058	0.916829	-0.811706	-0.503385	0.0138137	0.703675	-0.811679	-0.431471	0.0814531	0.26648
Dgka|ENSMUSG00000025357	2.67523	-0.04891	0.632164	0.9909	2.67526	0.225525	0.0184854	0.115829	2.6752	0.0934334	0.385908	0.688066	2.67518	0.082778	0.304692	0.999801	2.67517	0.172153	0.0883471	0.280864
Wibg|ENSMUSG00000064030	3.70878	-0.0854239	0.28351	0.943213	3.70869	0.0825472	0.266778	0.581313	3.70877	-0.00440938	0.958101	0.985772	3.70876	-0.004359	0.944303	0.999801	3.70869	-0.00746728	0.924024	0.9713
Rpsa-ps2|ENSMUSG00000045055	1.83955	-0.13798	0.284602	0.943213	1.8397	0.221041	0.0643323	0.260776	1.8395	0.212039	0.115742	0.362062	1.83948	-0.134279	0.177037	0.999801	1.83959	0.0828003	0.514523	0.755087
Mmp19|ENSMUSG00000025355	-1.64017	0.372424	0.289861	0.943213	-1.64014	-0.0214331	0.947187	0.983433	-1.64017	0.569787	0.127842	0.382099	-1.64018	-0.215362	0.424424	0.999801	-1.64019	0.348491	0.33299	0.605095
Tmem198b|ENSMUSG00000047090	3.77484	0.0458926	0.566223	0.984789	3.77515	0.521597	1.02581e-10	3.28274e-08	3.77473	0.650138	7.21493e-12	2.43963e-09	3.77467	-0.0835468	0.170458	0.999801	3.77471	0.558326	1.02961e-10	1.87236e-08
Dnajc14|ENSMUSG00000025354	6.06298	-0.0353082	0.465435	0.978767	6.06289	-0.104692	0.0202674	0.123437	6.06301	-0.171046	0.000920734	0.0115391	6.06303	0.0272987	0.475389	0.999801	6.06304	-0.144114	0.00278878	0.0224441
Ormdl2|ENSMUSG00000025353	2.83913	0.00930228	0.925152	0.997501	2.83922	0.364829	0.000287507	0.0052198	2.83909	0.389757	0.000528509	0.00754529	2.83906	-0.0186252	0.806293	0.999801	2.83916	0.364452	0.000567098	0.00640712
Sarnp|ENSMUSG00000078427	2.28449	0.0353777	0.754824	0.991393	2.28442	-0.0666931	0.52361	0.790594	2.28448	0.11967	0.321996	0.633781	2.28447	-0.154914	0.0794852	0.999801	2.28438	-0.0342973	0.760547	0.897845
Gdf11|ENSMUSG00000025352	4.05895	0.0641388	0.390738	0.972161	4.05932	0.472821	1.14769e-07	9.19348e-06	4.05885	0.561801	5.16665e-08	3.96257e-06	4.0588	-0.0222603	0.700128	0.999801	4.05892	0.532148	4.09695e-08	2.52828e-06
Cd63|ENSMUSG00000025351	4.03773	-0.0291709	0.694047	0.991393	4.03777	0.103641	0.13482	0.404602	4.03771	0.0157201	0.841049	0.946705	4.0377	0.0564395	0.337818	0.999801	4.03771	0.0702995	0.338185	0.609895
Rdh5|ENSMUSG00000025350	4.14023	-0.00244398	0.973376	0.999487	4.14027	0.183209	0.00712746	0.0594821	4.14019	0.182475	0.0178766	0.10716	4.14018	-0.0047079	0.93415	0.999801	4.1402	0.177036	0.0146368	0.0800133
Bloc1s1|ENSMUSG00000090247	4.73328	0.0219608	0.732388	0.991393	4.73329	0.14704	0.0137498	0.094296	4.73324	0.207597	0.00218789	0.0224718	4.73323	-0.0428255	0.390738	0.999801	4.73323	0.163822	0.0101422	0.0608103
Itga7|ENSMUSG00000025348	2.63166	0.0657994	0.523822	0.984789	2.63177	0.00470768	0.961399	0.989139	2.63163	0.10638	0.331955	0.64328	2.63162	-0.0373115	0.648001	0.999801	2.63171	0.0686921	0.503327	0.748439
Neurod4|ENSMUSG00000048015	-2.14503	0.276222	0.500823	0.982515	-2.14522	-0.65195	0.0822813	0.303128	NA	NA	NA	NA	NA	NA	NA	NA	NA	NA	NA	NA
Vmn2r84|ENSMUSG00000070601	-0.682584	0.200383	0.451927	0.977718	-0.682744	-0.469628	0.079162	0.295538	-0.682542	0.00352848	0.99003	0.996673	-0.682503	-0.272917	0.222494	0.999801	-0.682643	-0.260505	0.332281	0.604513
Gm9770|ENSMUSG00000040540	4.05575	-0.0117021	0.873665	0.996817	4.05581	-0.0205762	0.765913	0.913706	4.05576	-0.11007	0.157574	0.432546	4.05577	0.0757745	0.193856	0.999801	4.05586	-0.0341102	0.640229	0.834852
Vmn2r85|ENSMUSG00000092048	-1.62924	0.0780618	0.828074	0.994968	-1.62944	-0.182269	0.58265	0.825857	-1.6292	-0.0714286	0.854147	0.950829	-1.62918	-0.0389878	0.89166	0.999801	-1.62925	-0.0995288	0.780611	0.908728
Vmn2r87|ENSMUSG00000091511	-0.0389385	0.149604	0.489859	0.980691	-0.0390841	-0.319297	0.127197	0.391436	-0.0388863	-0.0977742	0.673323	0.870959	-0.0388583	-0.0755682	0.669802	0.999801	-0.0388903	-0.175731	0.418996	0.68057
Pisd-ps1|ENSMUSG00000082286	3.42133	-0.0658934	0.568236	0.984789	3.42146	0.0992342	0.367449	0.678372	3.4213	-0.0955763	0.436048	0.728999	3.42129	0.133105	0.146871	0.999801	3.42136	0.0159166	0.890886	0.957005
Gm11400|ENSMUSG00000081208	0.917644	0.298149	0.0784718	0.758644	0.91752	-0.145194	0.335996	0.649083	0.917634	0.128649	0.465334	0.747785	0.917622	0.0258962	0.842221	0.999801	0.917504	0.146846	0.377146	0.646223
Sfi1|ENSMUSG00000023764	4.20213	0.168987	0.0510531	0.67233	4.20223	-0.223656	0.0072618	0.0603394	4.2021	-0.0180789	0.837433	0.945019	4.20209	-0.0373264	0.568769	0.999801	4.20216	-0.0531543	0.520744	0.759022
Eif4enif1|ENSMUSG00000020454	5.84012	-0.0476001	0.340538	0.967907	5.84008	-0.0142572	0.76063	0.911578	5.84012	-0.0266622	0.614663	0.8382	5.84014	-0.0396629	0.31467	0.999801	5.84015	-0.0662787	0.180304	0.433139
Drg1|ENSMUSG00000020457	6.1493	-0.0357911	0.454936	0.978124	6.14922	-0.033876	0.448269	0.740598	6.14932	-0.104551	0.0403248	0.186212	6.14933	0.030328	0.425013	0.999801	6.14935	-0.0758931	0.111793	0.327673
Patz1|ENSMUSG00000020453	4.45029	0.015396	0.820226	0.994968	4.45024	-0.142312	0.0239057	0.137456	4.4503	-0.136148	0.0580873	0.237167	4.45032	0.00633356	0.906388	0.999801	4.45031	-0.133153	0.0470801	0.185222
Gm11944|ENSMUSG00000084941	-1.26232	0.129786	0.645839	0.990949	-1.26219	-0.224379	0.392548	0.700324	-1.26233	-0.0144377	0.960401	0.986842	-1.26233	-0.0895813	0.683333	0.999801	-1.26223	-0.104752	0.707931	0.871698
Pik3ip1|ENSMUSG00000034614	4.25904	0.144263	0.0406218	0.623461	4.25889	-0.138407	0.0361862	0.181247	4.25905	0.00538391	0.942644	0.982442	4.25907	-0.00329053	0.953683	0.999801	4.25895	0.00173139	0.9803	0.993537
Gm12592|ENSMUSG00000053263	0.21437	0.171688	0.420184	0.977718	0.214238	-0.236465	0.223875	0.531064	0.214411	0.0622755	0.782715	0.921387	0.214436	-0.141959	0.394572	0.999801	0.214415	-0.070475	0.738736	0.887543
Gm11948|ENSMUSG00000087055	-1.51359	0.360909	0.299867	0.945715	-1.51357	-0.111084	0.724295	0.897177	-1.51359	-0.0240438	0.946492	0.983242	-1.5136	0.273473	0.319091	0.999801	-1.51354	0.235662	0.481103	0.730244
Limk2|ENSMUSG00000020451	6.60917	0.126086	0.00609677	0.30456	6.60924	0.0743554	0.0837405	0.306139	6.60915	0.142368	0.00354545	0.0327443	6.60914	0.0566893	0.117848	0.999801	6.60914	0.194582	2.22379e-05	0.000469883
Rnf185|ENSMUSG00000020448	5.30162	-0.0755757	0.173007	0.876984	5.30161	-0.0116099	0.821328	0.937325	5.30164	-0.0754193	0.20061	0.493397	5.30166	-0.0164301	0.707457	0.999801	5.30171	-0.0927939	0.0928583	0.290558
8430429K09Rik|ENSMUSG00000034587	2.51889	-0.09977	0.347803	0.969129	2.51881	0.174683	0.0771768	0.291321	2.51885	0.0980987	0.382169	0.686373	2.51883	-0.0319359	0.702206	0.999801	2.51867	0.0802229	0.444734	0.701642
Gm11945|ENSMUSG00000081059	-0.05917	-0.0635143	0.762137	0.991393	-0.0592461	-0.013293	0.946731	0.983197	-0.0591843	-0.172831	0.43266	0.72601	-0.0591937	0.0976325	0.558303	0.999801	-0.0591763	-0.0765909	0.710642	0.873434
Pla2g3|ENSMUSG00000034579	1.52258	-0.385204	0.00692608	0.318523	1.5228	0.307461	0.022347	0.131492	1.52251	0.0372844	0.803573	0.929725	1.52251	-0.115373	0.294147	0.999801	1.52251	-0.0767093	0.58506	0.801982
Inpp5j|ENSMUSG00000034570	6.13159	-0.304649	4.59695e-06	0.00898303	6.1317	-0.127481	0.0198658	0.121904	6.13159	-0.36508	5.32022e-07	2.72892e-05	6.13162	-0.0686672	0.122857	0.999801	6.1318	-0.438473	6.26317e-09	5.46238e-07
Selm|ENSMUSG00000075702	5.67795	-0.188121	0.000788729	0.124459	5.67797	-0.192243	0.000304207	0.00547668	5.67795	-0.350266	3.82329e-07	2.05977e-05	5.67798	-0.0337628	0.408828	0.999801	5.67804	-0.383075	1.91816e-08	1.32214e-06
Smtn|ENSMUSG00000020439	2.66487	0.23624	0.0218868	0.521742	2.66493	-0.0792805	0.411576	0.71241	2.66484	0.143794	0.189831	0.477419	2.66483	0.0124651	0.877791	0.999801	2.66476	0.156337	0.130006	0.358577
Tug1|ENSMUSG00000056579	7.38772	0.00191039	0.965942	0.999487	7.38768	0.0322769	0.442856	0.737685	7.38772	0.0641924	0.176137	0.458389	7.38773	-0.0360215	0.309573	0.999801	7.38774	0.0304108	0.495047	0.741464
Morc2a|ENSMUSG00000034543	5.80172	0.0167544	0.738034	0.991393	5.80169	-0.0421655	0.367486	0.678372	5.80173	-0.0259132	0.62694	0.845622	5.80174	-0.00417726	0.916549	0.999801	5.80175	-0.0294316	0.553669	0.780011
Gm16518|ENSMUSG00000083015	-1.21572	-0.163964	0.546802	0.984789	-1.21562	0.0561089	0.834269	0.942331	-1.2157	-0.693811	0.0168111	0.102676	-1.2157	0.592195	0.00866404	0.591165	-1.21553	-0.108826	0.68013	0.85928
Osbp2|ENSMUSG00000020435	6.66998	-0.0178701	0.696313	0.991393	6.66984	-0.291099	9.48477e-09	1.1815e-06	6.67004	-0.356536	2.1786e-09	3.05932e-07	6.67008	0.0438778	0.229958	0.999801	6.67012	-0.31562	8.43386e-09	6.86395e-07
4921536K21Rik|ENSMUSG00000020434	-1.02089	-0.580363	0.0278678	0.56264	-1.02109	-0.104488	0.666697	0.869265	-1.02085	-0.840938	0.00426348	0.0373998	-1.02083	0.148836	0.498228	0.999801	-1.021	-0.681462	0.0110014	0.0648777
Dusp18|ENSMUSG00000047205	3.97511	-0.216857	0.00518539	0.287551	3.97504	-0.261195	0.000478961	0.00781953	3.97514	-0.302669	0.000437682	0.00648648	3.97518	-0.181503	0.00344051	0.42702	3.97519	-0.484984	1.60133e-07	7.84329e-06
Slc35e4|ENSMUSG00000048807	4.38543	0.103934	0.135508	0.854025	4.38535	0.0258793	0.688195	0.87908	4.38541	0.122357	0.0976528	0.327929	4.3854	0.00413753	0.939546	0.999801	4.38525	0.125867	0.0699507	0.240785
Tcn2|ENSMUSG00000020432	4.50471	-0.0113656	0.864362	0.99628	4.50477	-0.0193777	0.756696	0.91071	4.50469	-0.0325616	0.64482	0.856273	4.5047	0.000929401	0.986094	0.999801	4.50479	-0.0350047	0.596729	0.809583
Gm11953|ENSMUSG00000082816	-2.20783	1.17271	0.00791384	0.340792	-2.20795	-0.805774	0.0367014	0.18255	NA	NA	NA	NA	-2.2078	0.598062	0.0817519	0.999801	-2.20791	0.34809	0.42587	0.687344
Pes1|ENSMUSG00000020430	5.05884	0.00109673	0.985149	0.999487	5.0588	0.046598	0.394585	0.70173	5.05884	0.0501195	0.425104	0.718883	5.05884	-0.0057901	0.90046	0.999801	5.05884	0.0417712	0.478202	0.72783
Gal3st1|ENSMUSG00000049721	3.48012	0.0445394	0.59631	0.987824	3.48009	0.00636161	0.935479	0.979544	3.4801	0.137415	0.120118	0.36952	3.48008	-0.0915086	0.159187	0.999801	3.48022	0.0430741	0.604701	0.814392
Sec14l3|ENSMUSG00000054986	1.57504	-0.526092	0.00588212	0.302744	1.57532	-0.574323	0.00191673	0.0227819	1.57506	-0.640553	0.00201357	0.0212417	1.57513	-0.466226	0.00278125	0.400309	1.57554	-1.0955	7.33539e-07	2.73183e-05
Mtfp1|ENSMUSG00000004748	3.97542	-0.0762931	0.312021	0.952837	3.97553	0.190956	0.0070319	0.0588561	3.97539	0.153332	0.0553967	0.229684	3.97539	-0.0399716	0.499072	0.999801	3.97552	0.108497	0.150197	0.389849
Sec14l2|ENSMUSG00000003585	5.13036	-0.0721576	0.211229	0.904993	5.1305	0.0839109	0.121629	0.382316	5.13033	0.0375414	0.539257	0.79525	5.13033	-0.028012	0.538453	0.999801	5.1304	0.00810387	0.887787	0.955717
Rnf215|ENSMUSG00000003581	4.37	0.0142371	0.837	0.994968	4.37004	0.0114922	0.859601	0.952494	4.36998	0.00599667	0.934731	0.980638	4.36998	0.0203992	0.70888	0.999801	4.36993	0.0196966	0.774679	0.906329
Ccdc157|ENSMUSG00000051427	4.57553	0.0802254	0.223189	0.91463	4.5756	0.102373	0.0952398	0.330053	4.57551	0.134563	0.0549307	0.228471	4.5755	0.0465758	0.371679	0.999801	4.57546	0.176679	0.0070349	0.0460746
Sf3a1|ENSMUSG00000002129	6.41231	0.0658934	0.155211	0.866502	6.4123	-0.0720571	0.0995037	0.338755	6.41233	-0.0109633	0.823934	0.938539	6.41235	0.00349676	0.924608	0.999801	6.41239	-0.01115	0.808751	0.921653
Tbc1d10a|ENSMUSG00000034412	4.48819	-5.99276e-05	0.999298	0.999917	4.48831	0.0940284	0.137348	0.40883	4.48817	0.0892307	0.215654	0.512995	4.48817	0.0048522	0.926906	0.999801	4.48828	0.0827931	0.21982	0.483098
Gatsl3|ENSMUSG00000020424	1.26064	0.138398	0.357054	0.970269	1.2607	-0.0184481	0.894685	0.964237	1.2606	0.269468	0.0883703	0.308972	1.26059	-0.147029	0.212683	0.999801	1.26057	0.111741	0.456821	0.711654
Lif|ENSMUSG00000034394	-0.31612	-0.486113	0.0609489	0.711687	-0.315966	0.108875	0.661893	0.866201	-0.316156	-0.179357	0.491628	0.765409	-0.316163	-0.18842	0.343589	0.999801	-0.31603	-0.387417	0.121718	0.344363
Mtmr3|ENSMUSG00000034354	6.6365	0.0328066	0.472413	0.978767	6.63653	0.0381947	0.374052	0.68363	6.63649	0.0485475	0.317313	0.629336	6.63649	0.020039	0.580269	0.999801	6.63649	0.0670643	0.139675	0.373122
Ascc2|ENSMUSG00000020412	4.23679	0.0633998	0.371933	0.970798	4.23689	0.0400278	0.545322	0.802012	4.23678	0.114091	0.130029	0.386028	4.23677	-0.010832	0.84693	0.999801	4.23685	0.0977019	0.164939	0.411421
Uqcr10|ENSMUSG00000059534	6.19569	0.0257919	0.590378	0.987824	6.1957	-0.016287	0.715694	0.893834	6.19567	0.000444756	0.993026	0.997627	6.19567	0.00751467	0.841857	0.999801	6.19569	0.00407476	0.932144	0.974993
Zmat5|ENSMUSG00000009076	3.11994	0.0557644	0.537891	0.984789	3.11994	0.0662182	0.433332	0.731021	3.11994	0.00435595	0.963689	0.988244	3.11994	0.117613	0.101289	0.999801	3.11996	0.114636	0.201606	0.46116
Cabp7|ENSMUSG00000009075	3.50967	0.0443849	0.629311	0.990659	3.5099	0.0336761	0.698262	0.885568	3.50963	0.0658163	0.501651	0.77274	3.50962	0.0146322	0.842851	0.999801	3.50979	0.0791756	0.388058	0.656082
Nf2|ENSMUSG00000009073	7.00554	0.0642313	0.155604	0.867564	7.00567	0.156514	0.000223979	0.00428379	7.00549	0.23829	6.82591e-07	3.37151e-05	7.00547	-0.0199086	0.573562	0.999801	7.00551	0.216819	1.63909e-06	5.31664e-05
Nipsnap1|ENSMUSG00000034285	5.69718	0.0394269	0.439839	0.977718	5.69714	0.0406054	0.393542	0.700947	5.69718	0.0530979	0.330438	0.642183	5.69718	0.022936	0.57215	0.999801	5.69712	0.0764441	0.131984	0.361538
Thoc5|ENSMUSG00000034274	4.81825	0.0083204	0.893274	0.997217	4.81823	0.00893757	0.877687	0.958436	4.81825	-0.00863984	0.896043	0.966703	4.81826	0.0229305	0.642641	0.999801	4.81829	0.01125	0.854829	0.942283
AA413626|ENSMUSG00000084381	-2.097	-0.0606379	0.869597	0.996817	-2.09695	-0.356212	0.321624	0.635467	-2.09703	-0.293512	0.452484	0.738917	-2.09704	-0.116855	0.677902	0.999801	-2.0971	-0.404726	0.288936	0.561322
Nefh|ENSMUSG00000020396	5.29121	-0.221124	0.0190027	0.508495	5.29139	0.108368	0.2065	0.510748	5.29115	-0.0345528	0.717622	0.892978	5.29113	-0.0735754	0.318815	0.999801	5.29136	-0.110397	0.219727	0.483098
Ap1b1|ENSMUSG00000009090	7.29515	0.0212247	0.635367	0.9909	7.29513	-0.0320182	0.444241	0.738396	7.29515	-0.0410681	0.387314	0.688663	7.29516	0.0278895	0.431532	0.999801	7.29515	-0.0164614	0.712133	0.874218
Rasl10a|ENSMUSG00000034209	1.95792	-0.166982	0.259928	0.935516	1.95797	-0.319522	0.027722	0.152001	1.95794	-0.274253	0.0888784	0.309863	1.95799	-0.214537	0.0860596	0.999801	1.95819	-0.494318	0.00189414	0.0166555
Gas2l1|ENSMUSG00000034201	5.59376	-0.00719931	0.890072	0.997217	5.59387	-0.172285	0.000426209	0.00715597	5.59375	-0.157975	0.0041843	0.0369888	5.59376	-0.0221438	0.590644	0.999801	5.59391	-0.186508	0.000298785	0.00384018
Rhbdd3|ENSMUSG00000034175	3.37557	-0.0619807	0.465866	0.978767	3.37546	-0.0225197	0.775433	0.918068	3.37557	-0.166115	0.0647726	0.254841	3.37558	0.0785735	0.243552	0.999801	3.37547	-0.0861369	0.30889	0.581802
Ewsr1|ENSMUSG00000009079	7.56494	0.0178736	0.689347	0.991393	7.56493	0.0258139	0.541736	0.799873	7.56493	0.0398707	0.398052	0.696997	7.56493	0.00043352	0.990208	0.999801	7.56489	0.0425654	0.337901	0.609803
Emid1|ENSMUSG00000034164	2.27	-0.0236023	0.838389	0.994968	2.2702	0.458469	4.05158e-05	0.00109219	2.2699	0.442128	0.000269888	0.00442886	2.26985	-0.0068408	0.938834	0.999801	2.26982	0.434575	0.00016081	0.00230999
Kremen1|ENSMUSG00000020393	5.99033	-0.115268	0.071524	0.738305	5.99071	0.486628	2.5078e-09	4.35066e-07	5.99023	0.413035	7.07927e-07	3.4164e-05	5.99019	-0.0453587	0.357289	0.999801	5.99029	0.366996	1.42575e-06	4.70497e-05
Znrf3|ENSMUSG00000041961	4.65114	-0.0419929	0.517239	0.984789	4.65122	0.108813	0.0722123	0.280472	4.65112	0.0710099	0.302899	0.615673	4.65111	-0.0116086	0.820556	0.999801	4.65111	0.0646689	0.315421	0.587841
Xbp1|ENSMUSG00000020484	5.21823	-0.00762138	0.912457	0.997217	5.21832	0.035721	0.587745	0.828166	5.21824	0.0454782	0.544602	0.798303	5.21825	-0.0150326	0.787484	0.999801	5.21844	0.0192557	0.780763	0.908781
Ccdc117|ENSMUSG00000020482	4.4673	0.0255368	0.704294	0.991393	4.46738	0.0947749	0.134791	0.404584	4.46732	0.167415	0.0193458	0.113289	4.46733	-0.0506705	0.3458	0.999801	4.46743	0.117444	0.0786845	0.260161
Gm11964|ENSMUSG00000081021	3.54456	0.0494339	0.548393	0.984789	3.54451	-0.0193989	0.800813	0.928819	3.54454	0.00938644	0.914397	0.972638	3.54454	0.0194585	0.76377	0.999801	3.5445	0.0262369	0.74923	0.892072
Mrps24|ENSMUSG00000020477	4.25313	-0.00478651	0.946616	0.998531	4.25315	0.055588	0.400351	0.704412	4.2531	0.0165256	0.827243	0.940496	4.2531	0.0301432	0.591017	0.999801	4.25309	0.0455149	0.52105	0.75911
Urgcp|ENSMUSG00000049680	6.19601	0.0350308	0.461759	0.978767	6.19598	-0.0833592	0.0601223	0.249324	6.19602	-0.0265535	0.600876	0.830196	6.19603	-0.0241249	0.52464	0.999801	6.19601	-0.0548064	0.247865	0.517403
2210015D19Rik|ENSMUSG00000083844	4.02397	0.0746209	0.318934	0.955631	4.02394	0.012513	0.857004	0.951657	4.02398	0.0753209	0.343229	0.652485	4.02399	0.00728431	0.901213	0.999801	4.02404	0.0781069	0.292585	0.564996
Dbnl|ENSMUSG00000020476	5.88468	0.0256599	0.604652	0.987824	5.8846	-0.0849571	0.0655556	0.264052	5.88469	-0.0494749	0.347861	0.656411	5.8847	-0.012206	0.756421	0.999801	5.88467	-0.0650586	0.186997	0.442147
Pgam2|ENSMUSG00000020475	3.01082	0.250184	0.0475423	0.659245	3.01137	0.884696	6.03662e-09	8.3612e-07	3.01064	1.33567	1.35546e-11	4.38145e-09	3.01055	-0.195273	0.0318035	0.907182	3.01071	1.12425	1.55706e-10	2.61529e-08
Polm|ENSMUSG00000020474	2.97441	-0.0149697	0.873226	0.996817	2.97429	-0.141064	0.104642	0.350386	2.97442	-0.183706	0.0647465	0.254841	2.97442	0.0222544	0.765035	0.999801	2.97426	-0.159645	0.0851811	0.274216
Aebp1|ENSMUSG00000020473	2.6533	0.0941675	0.361992	0.970269	2.65319	-0.181592	0.0540742	0.234698	2.65333	-0.158169	0.149503	0.419677	2.65333	0.0662794	0.413054	0.999801	2.6534	-0.091133	0.375956	0.645889
Pold2|ENSMUSG00000020471	3.45647	0.0247013	0.765184	0.991393	3.4564	-0.100956	0.193882	0.493834	3.45647	-0.0480867	0.583729	0.820044	3.45647	-0.0286744	0.66543	0.999801	3.45645	-0.0792012	0.336844	0.608284
Gck|ENSMUSG00000041798	-0.905005	-0.0590182	0.823426	0.994968	-0.905173	0.0786093	0.740893	0.904237	-0.904976	-0.394949	0.165491	0.442652	-0.90497	0.39828	0.0568503	0.996196	-0.905129	0.00272649	0.992087	0.99702
Ykt6|ENSMUSG00000002741	6.35542	0.049109	0.294769	0.943662	6.35539	-0.0145431	0.740075	0.904107	6.35541	0.0421232	0.397686	0.69671	6.35542	-0.010499	0.777316	0.999801	6.35539	0.0307971	0.509708	0.7519
Camk2b|ENSMUSG00000057897	10.2612	-0.0918233	0.0472754	0.659238	10.2611	-0.296761	6.41042e-08	5.67521e-06	10.2612	-0.346166	2.37143e-08	2.116e-06	10.2612	-0.0457574	0.213407	0.999801	10.2613	-0.395381	6.38581e-10	8.33275e-08
Rps15a-ps6|ENSMUSG00000083022	2.07113	-0.121371	0.314397	0.952987	2.07111	0.162326	0.137774	0.409531	2.07112	-0.114674	0.37108	0.675738	2.0711	0.143418	0.128183	0.999801	2.07113	0.0406449	0.734331	0.885111
Nudcd3|ENSMUSG00000053838	7.26881	0.019287	0.665245	0.991393	7.26873	-0.192203	3.92456e-06	0.000165613	7.26884	-0.209274	9.53286e-06	0.000285663	7.26887	0.0327686	0.35685	0.999801	7.26889	-0.176892	6.16e-05	0.0010551
Npc1l1|ENSMUSG00000020447	-0.385245	-0.288625	0.222133	0.913094	-0.3851	0.329236	0.140498	0.414115	-0.385275	0.175272	0.473822	0.752883	-0.385277	-0.141562	0.437062	0.999801	-0.385116	0.0293595	0.897134	0.959182
Ddx56|ENSMUSG00000004393	4.80203	-0.0171891	0.782072	0.992394	4.80197	-0.0243211	0.674685	0.873185	4.80204	-0.0358742	0.588579	0.82262	4.80204	-0.00953292	0.84753	0.999801	4.80201	-0.0459076	0.457266	0.711786
Tmed4|ENSMUSG00000004394	5.98086	-0.00173362	0.971744	0.999487	5.98082	0.000929582	0.983778	0.995721	5.98087	0.00616492	0.905211	0.970408	5.98088	-0.0106945	0.781251	0.999801	5.98089	-0.00535126	0.912352	0.967238
Ogdh|ENSMUSG00000020456	8.23298	0.00260553	0.953491	0.999369	8.23293	-0.0824386	0.0485115	0.219352	8.23299	-0.0968517	0.0402879	0.186091	8.23301	0.0144899	0.681795	0.999801	8.23303	-0.0856008	0.0543329	0.204439
Zmiz2|ENSMUSG00000041164	7.58387	0.0651636	0.145634	0.856329	7.58393	-0.177838	2.15426e-05	0.000664263	7.58388	-0.154013	0.00113776	0.0136308	7.58389	0.0412576	0.24248	0.999801	7.58397	-0.119442	0.00737195	0.0478587
Ppia|ENSMUSG00000071866	3.2057	0.0455398	0.610891	0.987824	3.2057	-0.0580332	0.486271	0.766176	3.2057	-0.00706394	0.940521	0.981775	3.20571	-0.00805915	0.908574	0.999801	3.20581	-0.0188949	0.831599	0.931727
H2afv|ENSMUSG00000041126	5.28392	-0.0412374	0.458816	0.978767	5.2839	-0.0278253	0.592016	0.830248	5.28391	-0.0370477	0.527492	0.788163	5.28391	-0.0354118	0.418378	0.999801	5.28396	-0.0752777	0.172366	0.421977
Purb|ENSMUSG00000094483	9.49842	-0.0214829	0.639205	0.990949	9.49842	0.00735917	0.864722	0.953983	9.49842	-0.0619337	0.204761	0.498624	9.49843	0.0432577	0.232875	0.999801	9.49846	-0.0177717	0.699403	0.868931
Myo1g|ENSMUSG00000020437	-0.39201	0.257233	0.282943	0.943213	-0.391901	-0.45513	0.0425031	0.201845	-0.392024	-0.0276382	0.912343	0.972092	-0.392009	-0.155598	0.40138	0.999801	-0.391909	-0.210463	0.374026	0.643892
Gm11974|ENSMUSG00000085156	0.969197	-0.0882087	0.5888	0.987824	0.969112	0.266429	0.0816204	0.301274	0.969201	-0.0529566	0.759049	0.911284	0.969198	0.231041	0.0743619	0.999801	0.969052	0.169451	0.296139	0.568212
Ccm2|ENSMUSG00000000378	6.6577	-0.227728	0.00018746	0.0584161	6.65771	-0.0886724	0.0800746	0.298067	6.65771	-0.290186	1.43254e-05	0.000403656	6.65774	-0.030468	0.473138	0.999801	6.65786	-0.324351	9.97739e-07	3.51657e-05
Nacad|ENSMUSG00000041073	5.42024	0.0186443	0.728158	0.991393	5.42015	-0.19758	0.000104105	0.00234989	5.42026	-0.211485	0.000206251	0.0035728	5.42027	0.0305631	0.46951	0.999801	5.42025	-0.182579	0.000607971	0.00677487
Tbrg4|ENSMUSG00000000384	4.62932	0.0290797	0.655334	0.991393	4.62931	-0.0150369	0.804403	0.930253	4.62932	-0.0016513	0.980915	0.993828	4.62933	0.0133266	0.795418	0.999801	4.62932	0.00820348	0.899014	0.960142
Ramp3|ENSMUSG00000041046	2.02388	0.00135441	0.992005	0.999487	2.02387	-0.0255267	0.843251	0.945231	2.02388	0.0262858	0.854722	0.951154	2.02388	-0.0544071	0.612052	0.999801	2.02384	-0.0256941	0.848273	0.939813
Gm11977|ENSMUSG00000083819	0.317239	-0.00339347	0.985815	0.999487	0.317192	-0.269334	0.13757	0.409208	0.31726	-0.308332	0.136123	0.396408	0.317278	0.0378372	0.808934	0.999801	0.317326	-0.275489	0.150078	0.389706
Adcy1|ENSMUSG00000020431	7.16552	-0.0215828	0.737106	0.991393	7.16552	-0.213206	0.0010706	0.0147333	7.16555	-0.327596	4.10134e-05	0.000961865	7.16559	0.0896375	0.0876266	0.999801	7.1657	-0.239574	0.000691431	0.00746169
Igfbp3|ENSMUSG00000020427	2.38893	0.142135	0.1926	0.896661	2.38871	-0.413869	4.4914e-05	0.00117888	2.389	-0.235592	0.0443762	0.198551	2.38905	-0.0435547	0.622875	0.999801	2.38899	-0.270156	0.0134617	0.075263
Tns3|ENSMUSG00000020422	6.74694	0.015062	0.740662	0.991393	6.74704	0.057008	0.186226	0.483219	6.74692	0.0590157	0.218391	0.516824	6.74691	0.011627	0.747025	0.999801	6.74701	0.0721134	0.111778	0.327673
Hus1|ENSMUSG00000020413	4.32634	0.130596	0.0639412	0.721929	4.32634	0.0999516	0.126063	0.389501	4.32632	0.237395	0.00157459	0.0175853	4.32631	-0.00995728	0.856016	0.999801	4.32629	0.222916	0.00163248	0.0148513
[truncated: 15,452 more rows]
