# Supplementary material for: Histone deacetylase knockouts modify transcription, CAG instability and nuclear pathology in Huntington disease mice
Source: eLife. 2020 Sep 29;9:e55911. doi: 10.7554/eLife.55911 (PMC7581428; doi:10.7554/eLife.55911)
Supplement: Source data 3. [file elife-55911-data3.xlsx]

## Sheet: Pathways_ALL_DEGs(p<0.05)
Differentially regulated GO and KEGG pathways based on differentially expressed genes with nominal p value <0.05
	HttQ111/+ vs Htt+/+ in Hdac2 WT (contrast 3)			Hdac2 KO vs Hdac2 WT in HttQ111/+ (contrast 2)			Hdac2 KO vs Hdac2 WT in Htt+/+ (contrast 1)			HttQ111/+ vs Htt+/+ in Hdac2 KO (contrast 4)			HttQ111/+ Hdac2 KO vs Htt+/+ Hdac2 WT (contrast 5)
	Count	P value	FDR	Count	P value	FDR	Count	P value	FDR	Count	P value	FDR	Count	P value	FDR
GO:0005886~plasma membrane	319	4.39982e-12	2.58269e-09	887	2.61616e-19	2.48797e-16	919	2.89701e-19	2.80431e-16	218	1.01271e-09	4.71924e-07	1001	8.97073e-19	9.18602e-16
GO:0045202~synapse	76	1.48758e-09	4.36605e-07	180	4.30623e-12	2.04761e-09	184	1.17524e-11	3.7921e-09	36	0.0175848	0.385115	204	3.39823e-13	1.7399e-10
GO:0007156~homophilic cell adhesion via plasma membrane adhesion molecules	26	5.07647e-07	0.00182333	47	1.28975e-05	0.0156094	48	1.86738e-05	0.0191176	NA	NA	NA	55	9.66913e-07	0.00453589
mmu04921:Oxytocin signaling pathway	29	1.26644e-06	0.000327955	42	0.0357377	0.309554	52	0.000490437	0.0127175	NA	NA	NA	59	6.58702e-05	0.00209181
GO:0005509~calcium ion binding	72	1.30161e-06	0.00141126	184	2.53135e-09	4.76652e-06	176	3.86216e-06	0.00383933	NA	NA	NA	206	2.43235e-09	5.07144e-06
mmu05032:Morphine addiction	22	1.5384e-06	0.000199203	NA	NA	NA	37	0.000238252	0.00851186	11	0.0186592	0.428994	41	7.26321e-05	0.00209181
GO:0030054~cell junction	84	2.51502e-06	0.000491985	223	4.77003e-10	1.13408e-07	240	1.9378e-12	9.37887e-10	46	0.0202057	0.378497	249	1.00361e-09	2.56923e-07
GO:0007626~locomotory behavior	22	3.46349e-06	0.0062063	37	0.000462203	0.209405	41	4.04363e-05	0.0351931	15	0.000193441	0.162503	45	1.38053e-05	0.022185
GO:0016020~membrane	515	6.89291e-06	0.00101103	1484	1.7071e-05	0.00135198	1554	3.12273e-06	0.000302235	326	0.0120239	0.296943	1722	7.27384e-07	8.27602e-05
GO:0042995~cell projection	79	7.21303e-05	0.00843265	208	1.99536e-06	0.000210821	215	3.0023e-06	0.000322862	NA	NA	NA	228	3.5501e-05	0.00259665
mmu04261:Adrenergic signaling in cardiomyocytes	24	9.57034e-05	0.00822874	44	0.00307782	0.0930017	51	0.00013594	0.0097069	14	0.0213808	0.373508	52	0.000782035	0.0153527
GO:0016021~integral component of membrane	359	0.000105905	0.0103081	1048	3.01262e-06	0.00028646	1072	8.10596e-05	0.0052176	242	0.000633806	0.0480485	1202	1.61262e-06	0.00015012
GO:0045211~postsynaptic membrane	33	0.0001179	0.0098386	91	2.77301e-10	8.79045e-08	92	1.06175e-09	2.05554e-07	18	0.0322767	0.485593	105	1.7636e-12	6.01977e-10
GO:0070588~calcium ion transmembrane transport	17	0.000127611	0.14181	NA	NA	NA	33	0.000402104	0.174589	NA	NA	NA	32	0.00542737	1
GO:0043005~neuron projection	52	0.000168279	0.0122726	125	0.000267246	0.0157611	138	4.59231e-06	0.000370379	31	0.0175872	0.368316	144	6.75837e-05	0.00461371
GO:0014069~postsynaptic density	36	0.000196835	0.0127572	98	7.33328e-09	1.16232e-06	104	5.2459e-10	1.26951e-07	25	0.0012469	0.079704	109	4.82939e-09	9.89059e-07
GO:0021756~striatum development	7	0.000237098	0.191938	NA	NA	NA	NA	NA	NA	NA	NA	NA	8	0.0438538	1
GO:0007186~G-protein coupled receptor signaling pathway	46	0.000243663	0.160723	NA	NA	NA	103	0.0272794	0.937133	33	0.000890769	0.335321	113	0.0201223	1
GO:0016604~nuclear body	13	0.000246989	0.0143954	NA	NA	NA	NA	NA	NA	NA	NA	NA	NA	NA	NA
mmu04723:Retrograde endocannabinoid signaling	19	0.000275782	0.0177008	34	0.0049787	0.103647	39	0.00039927	0.0113959	NA	NA	NA	44	6.84824e-05	0.00209181
GO:0061003~positive regulation of dendritic spine morphogenesis	8	0.000377821	0.202618	NA	NA	NA	NA	NA	NA	NA	NA	NA	NA	NA	NA
GO:0007165~signal transduction	87	0.00038014	0.177384	231	0.000120164	0.0782081	237	0.000324973	0.167445	66	8.55146e-05	0.110937	252	0.00233231	0.65183
GO:0034765~regulation of ion transmembrane transport	21	0.000380919	0.157354	52	7.65437e-07	0.00465752	54	9.42443e-07	0.00194645	13	0.0166705	0.83104	53	3.10862e-05	0.0317995
GO:0005516~calmodulin binding	27	0.000395866	0.193297	58	0.00198062	0.339529	59	0.00275655	0.306896	16	0.0280324	0.887136	71	6.46525e-05	0.0337001
GO:0005244~voltage-gated ion channel activity	21	0.000396371	0.133578	50	4.94277e-06	0.00464282	51	1.56003e-05	0.0103052	13	0.0170157	0.799999	50	0.000324664	0.135385
GO:0043025~neuronal cell body	60	0.000424075	0.0223807	164	1.23917e-06	0.000147295	164	1.78446e-05	0.00123308	41	0.0023399	0.103419	179	1.09376e-05	0.000861549
GO:0007605~sensory perception of sound	20	0.000502954	0.182049	38	0.00675025	0.703284	40	0.0054023	0.698762	NA	NA	NA	41	0.0154669	1
GO:0007155~cell adhesion	51	0.000558233	0.181876	120	0.00570206	0.663746	NA	NA	NA	NA	NA	NA	NA	NA	NA
GO:0006816~calcium ion transport	21	0.000682646	0.200027	43	0.00331961	0.515329	50	7.42043e-05	0.0559055	NA	NA	NA	51	0.000527376	0.213546
mmu05410:Hypertrophic cardiomyopathy (HCM)	15	0.000765447	0.038889	NA	NA	NA	25	0.0371388	0.30376	NA	NA	NA	27	0.0315571	0.324588
GO:0030315~T-tubule	13	0.000785832	0.0377254	20	0.0458722	0.613315	25	0.0016039	0.0681917	NA	NA	NA	27	0.0012977	0.0699391
mmu04728:Dopaminergic synapse	21	0.000819815	0.0347838	40	0.00983226	0.171168	48	0.000190178	0.00905647	NA	NA	NA	57	2.24187e-06	0.000436778
GO:0030424~axon	45	0.000831434	0.0368615	120	7.38974e-06	0.000638675	126	2.34131e-06	0.000283259	32	0.00186262	0.0920195	140	3.65158e-07	5.34174e-05
mmu04024:cAMP signaling pathway	27	0.00110671	0.0401429	62	0.000280042	0.019758	58	0.0135778	0.178133	17	0.0347476	0.451855	67	0.001609	0.0258679
GO:0051209~release of sequestered calcium ion into cytosol	9	0.00130785	0.324341	NA	NA	NA	14	0.0232333	0.91903	NA	NA	NA	15	0.0159212	1
mmu04020:Calcium signaling pathway	25	0.00134129	0.0425229	51	0.0130525	0.187813	57	0.00195609	0.0423058	17	0.0146236	0.393999	64	0.000361108	0.00799992
GO:0006469~negative regulation of protein kinase activity	16	0.00134824	0.311397	28	0.038362	0.973077	NA	NA	NA	10	0.0230452	0.882015	33	0.013337	1
GO:0098794~postsynapse	8	0.00142056	0.0578628	NA	NA	NA	NA	NA	NA	5	0.0248474	0.413136	NA	NA	NA
GO:0005272~sodium channel activity	8	0.00150111	0.334677	NA	NA	NA	17	5.69457e-05	0.0224324	NA	NA	NA	14	0.00416358	0.536704
GO:0030672~synaptic vesicle membrane	13	0.00152861	0.0581085	NA	NA	NA	NA	NA	NA	NA	NA	NA	NA	NA	NA
mmu04010:MAPK signaling pathway	32	0.00179133	0.0502881	72	0.00458479	0.103394	NA	NA	NA	NA	NA	NA	NA	NA	NA
GO:0030432~peristalsis	5	0.00200206	0.40227	NA	NA	NA	NA	NA	NA	NA	NA	NA	6	0.0436422	1
mmu05414:Dilated cardiomyopathy	15	0.00207987	0.0524966	NA	NA	NA	27	0.0384953	0.304715	NA	NA	NA	29	0.036836	0.353625
GO:0055085~transmembrane transport	38	0.00215458	0.403657	NA	NA	NA	100	0.000585687	0.192438	NA	NA	NA	97	0.0360509	1
mmu04726:Serotonergic synapse	17	0.00222019	0.0509876	31	0.0340387	0.315875	33	0.026104	0.271164	NA	NA	NA	40	0.00161675	0.0258679
GO:0035556~intracellular signal transduction	44	0.00228342	0.401688	108	0.00383724	0.554502	118	0.0003582	0.169031	33	0.00149715	0.337692	118	0.0148425	1
GO:0005903~brush border	13	0.00240339	0.084496	NA	NA	NA	NA	NA	NA	NA	NA	NA	NA	NA	NA
GO:0051899~membrane depolarization	7	0.00249531	0.41042	NA	NA	NA	NA	NA	NA	NA	NA	NA	NA	NA	NA
GO:0031225~anchored component of membrane	16	0.00258315	0.0854379	NA	NA	NA	NA	NA	NA	NA	NA	NA	NA	NA	NA
mmu04510:Focal adhesion	28	0.00262735	0.0551997	NA	NA	NA	NA	NA	NA	NA	NA	NA	NA	NA	NA
GO:0009986~cell surface	56	0.00264864	0.0828549	NA	NA	NA	NA	NA	NA	NA	NA	NA	NA	NA	NA
GO:0043204~perikaryon	21	0.00266843	0.0792351	46	0.00554094	0.19052	51	0.00101728	0.0505325	NA	NA	NA	61	7.40423e-06	0.000631828
GO:0005887~integral component of plasma membrane	77	0.00266867	0.0754335	199	0.00838396	0.248704	212	0.00310053	0.101795	65	9.09519e-06	0.0014118	226	0.0124704	0.364847
GO:0003779~actin binding	39	0.00268309	0.441786	101	0.000316716	0.138532	97	0.00827136	0.562751	NA	NA	NA	109	0.00294895	0.481519
mmu04720:Long-term potentiation	13	0.00270033	0.0524463	27	0.000728538	0.0406907	32	1.16154e-05	0.00166543	NA	NA	NA	33	3.54593e-05	0.00209181
mmu04713:Circadian entrainment	16	0.00293239	0.0528795	39	1.76673e-05	0.00251444	41	1.07548e-05	0.00308189	NA	NA	NA	45	3.03318e-06	0.000436778
mmu05412:Arrhythmogenic right ventricular cardiomyopathy (ARVC)	13	0.00311335	0.0524172	NA	NA	NA	NA	NA	NA	NA	NA	NA	NA	NA	NA
mmu05200:Pathways in cancer	44	0.00331419	0.0523192	99	0.043985	0.357289	NA	NA	NA	NA	NA	NA	NA	NA	NA
GO:0086002~cardiac muscle cell action potential involved in contraction	5	0.00338196	0.491656	7	0.00828978	0.746443	NA	NA	NA	NA	NA	NA	NA	NA	NA
GO:0030425~dendrite	51	0.00368755	0.0981134	162	9.32831e-10	1.77425e-07	152	8.03596e-06	0.000598193	39	0.00129019	0.072444	172	1.5659e-07	2.67247e-05
GO:0035725~sodium ion transmembrane transport	8	0.00383651	0.51679	NA	NA	NA	15	0.0041255	0.641408	NA	NA	NA	NA	NA	NA
mmu04922:Glucagon signaling pathway	15	0.00387563	0.057445	NA	NA	NA	NA	NA	NA	NA	NA	NA	NA	NA	NA
mmu04910:Insulin signaling pathway	20	0.00403746	0.0565503	NA	NA	NA	NA	NA	NA	NA	NA	NA	NA	NA	NA
GO:0001656~metanephros development	7	0.00436152	0.544198	NA	NA	NA	NA	NA	NA	NA	NA	NA	NA	NA	NA
GO:0086006~voltage-gated sodium channel activity involved in cardiac muscle cell action potential	4	0.00436421	0.546574	NA	NA	NA	NA	NA	NA	NA	NA	NA	NA	NA	NA
GO:0001786~phosphatidylserine binding	9	0.0050968	0.547073	17	0.00465164	0.518872	NA	NA	NA	NA	NA	NA	17	0.0209522	1
GO:0003774~motor activity	13	0.00510031	0.500176	NA	NA	NA	NA	NA	NA	NA	NA	NA	NA	NA	NA
GO:0005249~voltage-gated potassium channel activity	12	0.00517208	0.464814	27	0.000696792	0.170973	31	4.04171e-05	0.0199269	NA	NA	NA	33	2.43713e-05	0.0169381
mmu05031:Amphetamine addiction	12	0.00537847	0.0708777	27	0.000279718	0.0262269	28	0.000284037	0.00901801	NA	NA	NA	31	8.74588e-05	0.00228983
GO:0005216~ion channel activity	21	0.00544585	0.447051	56	2.27395e-05	0.0141716	66	6.77094e-08	0.000134868	NA	NA	NA	69	6.42342e-08	6.69641e-05
mmu04080:Neuroactive ligand-receptor interaction	26	0.00550255	0.0689617	71	5.50111e-06	0.00156659	70	0.000133376	0.0126794	19	0.0139982	0.428325	76	4.60986e-05	0.00209181
GO:0006811~ion transport	52	0.00554848	0.614222	151	1.15384e-05	0.0174394	174	1.10228e-09	6.83631e-06	41	0.000989502	0.322215	172	5.27814e-06	0.0113093
GO:0030276~clathrin binding	10	0.00565692	0.428541	19	0.00851207	0.612048	NA	NA	NA	NA	NA	NA	NA	NA	NA
mmu05143:African trypanosomiasis	7	0.00616292	0.0734105	NA	NA	NA	NA	NA	NA	NA	NA	NA	NA	NA	NA
GO:0048839~inner ear development	11	0.00623169	0.639946	NA	NA	NA	NA	NA	NA	NA	NA	NA	NA	NA	NA
GO:0042472~inner ear morphogenesis	10	0.00711811	0.672599	NA	NA	NA	NA	NA	NA	NA	NA	NA	NA	NA	NA
mmu04727:GABAergic synapse	14	0.00723323	0.081914	28	0.014522	0.197022	31	0.00454613	0.0834888	NA	NA	NA	34	0.00290593	0.042936
GO:0048786~presynaptic active zone	8	0.00728723	0.177288	NA	NA	NA	NA	NA	NA	NA	NA	NA	NA	NA	NA
GO:0007268~chemical synaptic transmission	20	0.00735294	0.668948	57	2.55851e-06	0.00777182	58	8.43624e-06	0.0104098	17	0.00150682	0.314077	64	1.41129e-06	0.00453589
GO:0086012~membrane depolarization during cardiac muscle cell action potential	4	0.00792907	0.681695	NA	NA	NA	NA	NA	NA	NA	NA	NA	NA	NA	NA
GO:0060406~positive regulation of penile erection	4	0.00792907	0.681695	NA	NA	NA	NA	NA	NA	NA	NA	NA	NA	NA	NA
GO:0004674~protein serine/threonine kinase activity	44	0.00814212	0.522503	109	0.0237914	0.801965	NA	NA	NA	NA	NA	NA	NA	NA	NA
mmu05034:Alcoholism	18	0.00836932	0.0903019	NA	NA	NA	42	0.00559635	0.090395	NA	NA	NA	52	4.80288e-05	0.00209181
GO:0042391~regulation of membrane potential	14	0.00866559	0.69983	30	0.0120834	0.821704	36	0.000307751	0.191122	NA	NA	NA	41	3.46292e-05	0.0317995
GO:0007214~gamma-aminobutyric acid signaling pathway	7	0.00884673	0.693693	NA	NA	NA	13	0.00777216	0.739252	NA	NA	NA	NA	NA	NA
GO:0090102~cochlea development	7	0.00884673	0.693693	NA	NA	NA	NA	NA	NA	NA	NA	NA	NA	NA	NA
mmu04015:Rap1 signaling pathway	26	0.00884704	0.0914444	NA	NA	NA	NA	NA	NA	19	0.0199096	0.412459	65	0.0433184	0.400752
GO:0007611~learning or memory	10	0.00951821	0.7071	NA	NA	NA	NA	NA	NA	NA	NA	NA	NA	NA	NA
GO:0090314~positive regulation of protein targeting to membrane	7	0.0108881	0.742608	NA	NA	NA	NA	NA	NA	NA	NA	NA	NA	NA	NA
GO:0045880~positive regulation of smoothened signaling pathway	7	0.0108881	0.742608	NA	NA	NA	NA	NA	NA	NA	NA	NA	NA	NA	NA
GO:0005923~bicellular tight junction	15	0.0109251	0.244489	33	0.0121168	0.320533	37	0.00140376	0.0627004	12	0.00669414	0.20034	36	0.0164271	0.46726
GO:0001518~voltage-gated sodium channel complex	5	0.0111138	0.23917	7	0.0469938	0.599686	10	0.00105141	0.0496405	NA	NA	NA	9	0.00601125	0.251886
GO:0051965~positive regulation of synapse assembly	12	0.0112462	0.742131	NA	NA	NA	NA	NA	NA	NA	NA	NA	28	0.0127147	1
mmu04360:Axon guidance	19	0.0113635	0.111659	42	0.0147679	0.191045	48	0.00132978	0.0313241	16	0.00411355	0.387693	55	0.000159904	0.00383769
mmu05144:Malaria	8	0.0114277	0.108182	NA	NA	NA	NA	NA	NA	NA	NA	NA	NA	NA	NA
GO:0009968~negative regulation of signal transduction	10	0.0124833	0.767013	NA	NA	NA	19	0.0328835	0.948308	NA	NA	NA	20	0.0442993	1
GO:0030165~PDZ domain binding	17	0.0125298	0.650887	36	0.0402413	0.869358	39	0.0221809	0.774491	13	0.0122302	0.925465	43	0.0155779	1
GO:0004871~signal transducer activity	41	0.0131247	0.640809	102	0.0380129	0.868278	NA	NA	NA	34	0.00109181	0.602275	NA	NA	NA
GO:0021766~hippocampus development	12	0.0140147	0.795175	26	0.0108174	0.817478	25	0.0350517	0.955701	NA	NA	NA	28	0.0196863	1
GO:0020037~heme binding	14	0.0142301	0.64538	NA	NA	NA	NA	NA	NA	NA	NA	NA	NA	NA	NA
GO:0060079~excitatory postsynaptic potential	8	0.0144228	0.79457	15	0.0207992	0.915011	NA	NA	NA	7	0.00651572	0.652664	NA	NA	NA
GO:0016459~myosin complex	9	0.0148645	0.296465	NA	NA	NA	NA	NA	NA	7	0.0181442	0.361795	NA	NA	NA
GO:0005245~voltage-gated calcium channel activity	8	0.0153812	0.650463	NA	NA	NA	16	0.0142698	0.653676	NA	NA	NA	16	0.0352463	1
mmu04725:Cholinergic synapse	16	0.0157877	0.141572	39	0.00150106	0.0593279	39	0.00555403	0.095075	16	0.000568185	0.126517	48	6.75249e-05	0.00209181
GO:0051781~positive regulation of cell division	8	0.0168479	0.834137	NA	NA	NA	NA	NA	NA	NA	NA	NA	NA	NA	NA
GO:0035255~ionotropic glutamate receptor binding	7	0.0168706	0.662412	NA	NA	NA	NA	NA	NA	6	0.0123722	0.877722	15	0.00824038	0.689116
GO:0005524~ATP binding	126	0.016998	0.644208	NA	NA	NA	NA	NA	NA	NA	NA	NA	NA	NA	NA
mmu04724:Glutamatergic synapse	16	0.0171492	0.147861	38	0.00357075	0.0885154	44	0.000164964	0.00942504	13	0.0123273	0.445908	51	6.67573e-06	0.00064087
GO:0008584~male gonad development	13	0.0172766	0.83305	NA	NA	NA	NA	NA	NA	NA	NA	NA	NA	NA	NA
GO:0000053~argininosuccinate metabolic process	3	0.0173192	0.825296	NA	NA	NA	NA	NA	NA	NA	NA	NA	NA	NA	NA
GO:0043987~histone H3-S10 phosphorylation	3	0.0173192	0.825296	NA	NA	NA	NA	NA	NA	NA	NA	NA	NA	NA	NA
GO:1901896~positive regulation of calcium-transporting ATPase activity	3	0.0173192	0.825296	NA	NA	NA	NA	NA	NA	NA	NA	NA	NA	NA	NA
GO:0008076~voltage-gated potassium channel complex	12	0.0176467	0.330996	32	0.000176977	0.0111586	37	3.32674e-06	0.000292711	NA	NA	NA	35	0.000203111	0.0129991
GO:0035175~histone kinase activity (H3-S10 specific)	3	0.0177511	0.640409	NA	NA	NA	NA	NA	NA	NA	NA	NA	NA	NA	NA
GO:0004672~protein kinase activity	52	0.0181177	0.629127	NA	NA	NA	NA	NA	NA	NA	NA	NA	NA	NA	NA
GO:0006468~protein phosphorylation	55	0.0185304	0.837543	NA	NA	NA	NA	NA	NA	NA	NA	NA	NA	NA	NA
GO:0007269~neurotransmitter secretion	7	0.01897	0.836658	NA	NA	NA	NA	NA	NA	NA	NA	NA	NA	NA	NA
GO:0048169~regulation of long-term neuronal synaptic plasticity	7	0.01897	0.836658	NA	NA	NA	13	0.0314735	0.945889	NA	NA	NA	16	0.00375373	0.86175
GO:0032420~stereocilium	7	0.0192393	0.344497	NA	NA	NA	13	0.0311794	0.451857	NA	NA	NA	NA	NA	NA
GO:0043198~dendritic shaft	11	0.0192478	0.334655	29	0.000170656	0.0115264	34	1.3036e-06	0.000180253	12	0.000261359	0.0240675	36	1.40847e-06	0.000144227
GO:0010880~regulation of release of sequestered calcium ion into cytosol by sarcoplasmic reticulum	5	0.0196146	0.838949	NA	NA	NA	NA	NA	NA	NA	NA	NA	NA	NA	NA
GO:0014059~regulation of dopamine secretion	5	0.0196146	0.838949	9	0.00819748	0.752047	NA	NA	NA	4	0.0334124	0.914507	9	0.0207022	1
GO:0070498~interleukin-1-mediated signaling pathway	5	0.0196146	0.838949	8	0.0318136	0.958431	8	0.0401523	0.964713	NA	NA	NA	NA	NA	NA
GO:0060840~artery development	4	0.0197199	0.833046	NA	NA	NA	NA	NA	NA	NA	NA	NA	NA	NA	NA
GO:0017158~regulation of calcium ion-dependent exocytosis	6	0.0203748	0.835522	10	0.0456532	0.978748	NA	NA	NA	NA	NA	NA	11	0.0436015	1
GO:0006094~gluconeogenesis	6	0.0203748	0.835522	NA	NA	NA	NA	NA	NA	NA	NA	NA	NA	NA	NA
GO:0004930~G-protein coupled receptor activity	30	0.0204984	0.657023	NA	NA	NA	NA	NA	NA	25	0.00328832	0.750914	NA	NA	NA
GO:0005246~calcium channel regulator activity	6	0.0214111	0.656107	NA	NA	NA	NA	NA	NA	NA	NA	NA	NA	NA	NA
GO:0003151~outflow tract morphogenesis	9	0.0217101	0.847219	NA	NA	NA	NA	NA	NA	NA	NA	NA	NA	NA	NA
mmu04151:PI3K-Akt signaling pathway	34	0.0220703	0.180711	NA	NA	NA	NA	NA	NA	NA	NA	NA	NA	NA	NA
GO:0043010~camera-type eye development	10	0.0228385	0.855077	NA	NA	NA	NA	NA	NA	NA	NA	NA	NA	NA	NA
GO:0050804~modulation of synaptic transmission	6	0.0247182	0.870616	NA	NA	NA	NA	NA	NA	NA	NA	NA	NA	NA	NA
GO:0005102~receptor binding	36	0.0249917	0.696975	91	0.0497366	0.876106	NA	NA	NA	25	0.0453192	0.899996	NA	NA	NA
GO:0005089~Rho guanyl-nucleotide exchange factor activity	12	0.0251495	0.683841	26	0.0309257	0.851645	29	0.0087216	0.54759	NA	NA	NA	32	0.00510054	0.545297
GO:1902711~GABA-A receptor complex	5	0.025389	0.405803	NA	NA	NA	9	0.0181585	0.351217	NA	NA	NA	9	0.0338917	0.674732
GO:0007015~actin filament organization	12	0.0254194	0.872161	NA	NA	NA	27	0.0312349	0.949306	NA	NA	NA	32	0.00542737	1
GO:0001934~positive regulation of protein phosphorylation	21	0.0257625	0.869944	NA	NA	NA	NA	NA	NA	NA	NA	NA	NA	NA	NA
GO:0001662~behavioral fear response	8	0.0258231	0.86482	NA	NA	NA	16	0.0375486	0.961285	6	0.0459844	0.936353	17	0.0428433	1
GO:0001975~response to amphetamine	7	0.0261898	0.862983	NA	NA	NA	NA	NA	NA	6	0.0183145	0.83723	15	0.0223118	1
GO:0004890~GABA-A receptor activity	5	0.0261984	0.68405	NA	NA	NA	9	0.0197539	0.758144	NA	NA	NA	9	0.0359365	1
GO:0005096~GTPase activator activity	27	0.0265522	0.674704	72	0.00571509	0.537396	73	0.00993556	0.548701	NA	NA	NA	77	0.0271731	1
GO:0043197~dendritic spine	19	0.0268417	0.412794	62	4.63664e-07	6.29902e-05	64	3.52939e-07	5.69392e-05	17	0.00261115	0.104849	68	6.06915e-07	7.76851e-05
GO:0005544~calcium-dependent phospholipid binding	8	0.0274469	0.67319	17	0.0119851	0.64371	NA	NA	NA	NA	NA	NA	NA	NA	NA
GO:0010579~positive regulation of adenylate cyclase activity involved in G-protein coupled receptor signaling pathway	4	0.0278889	0.87447	NA	NA	NA	NA	NA	NA	NA	NA	NA	NA	NA	NA
GO:0048643~positive regulation of skeletal muscle tissue development	4	0.0278889	0.87447	NA	NA	NA	NA	NA	NA	NA	NA	NA	NA	NA	NA
GO:0005883~neurofilament	4	0.0281167	0.41727	NA	NA	NA	NA	NA	NA	NA	NA	NA	NA	NA	NA
GO:0032421~stereocilium bundle	4	0.0281167	0.41727	6	0.0429149	0.596193	7	0.0104223	0.257912	NA	NA	NA	NA	NA	NA
GO:0006814~sodium ion transport	13	0.0293795	0.882819	NA	NA	NA	37	0.000531725	0.209917	10	0.0348118	0.917785	NA	NA	NA
GO:0004860~protein kinase inhibitor activity	9	0.0295111	0.686754	NA	NA	NA	20	0.0140507	0.661805	NA	NA	NA	20	0.0395631	1
GO:0008081~phosphoric diester hydrolase activity	9	0.0295111	0.686754	NA	NA	NA	NA	NA	NA	NA	NA	NA	NA	NA	NA
GO:0035335~peptidyl-tyrosine dephosphorylation	6	0.0296137	0.879849	NA	NA	NA	NA	NA	NA	NA	NA	NA	NA	NA	NA
GO:0030018~Z disc	15	0.0296483	0.424252	35	0.0350794	0.554503	40	0.00362638	0.107244	NA	NA	NA	39	0.035857	0.692784
GO:0005891~voltage-gated calcium channel complex	6	0.0299668	0.417948	NA	NA	NA	12	0.0157655	0.325933	NA	NA	NA	NA	NA	NA
GO:0008306~associative learning	7	0.0304009	0.88168	14	0.0216746	0.919673	15	0.0171602	0.868072	NA	NA	NA	16	0.00861773	1
GO:0035023~regulation of Rho protein signal transduction	12	0.0304039	0.876844	26	0.0450445	0.979844	29	0.0135206	0.81521	NA	NA	NA	32	0.00864151	1
GO:0005215~transporter activity	17	0.0327807	0.712635	40	0.0432309	0.868619	43	0.0236737	0.774945	13	0.0289982	0.873775	NA	NA	NA
GO:0007195~adenylate cyclase-inhibiting dopamine receptor signaling pathway	3	0.0328511	0.891799	NA	NA	NA	NA	NA	NA	3	0.0151881	0.839571	NA	NA	NA
GO:1902260~negative regulation of delayed rectifier potassium channel activity	3	0.0328511	0.891799	NA	NA	NA	NA	NA	NA	NA	NA	NA	NA	NA	NA
GO:0031161~phosphatidylinositol catabolic process	3	0.0328511	0.891799	NA	NA	NA	NA	NA	NA	NA	NA	NA	NA	NA	NA
GO:0006526~arginine biosynthetic process	3	0.0328511	0.891799	NA	NA	NA	NA	NA	NA	NA	NA	NA	NA	NA	NA
GO:1903215~negative regulation of protein targeting to mitochondrion	3	0.0328511	0.891799	NA	NA	NA	NA	NA	NA	NA	NA	NA	NA	NA	NA
GO:1901660~calcium ion export	3	0.0328511	0.891799	NA	NA	NA	NA	NA	NA	NA	NA	NA	NA	NA	NA
GO:1990635~proximal dendrite	3	0.033042	0.440156	NA	NA	NA	NA	NA	NA	NA	NA	NA	NA	NA	NA
GO:0005610~laminin-5 complex	3	0.033042	0.440156	NA	NA	NA	NA	NA	NA	NA	NA	NA	NA	NA	NA
GO:0060048~cardiac muscle contraction	8	0.0333498	0.891069	NA	NA	NA	NA	NA	NA	NA	NA	NA	18	0.0341627	1
GO:0005501~retinoid binding	3	0.0336473	0.709995	NA	NA	NA	NA	NA	NA	3	0.0155415	0.889566	NA	NA	NA
mmu05211:Renal cell carcinoma	11	0.0348457	0.263761	NA	NA	NA	NA	NA	NA	NA	NA	NA	NA	NA	NA
GO:0048754~branching morphogenesis of an epithelial tube	7	0.0350312	0.898654	NA	NA	NA	NA	NA	NA	NA	NA	NA	NA	NA	NA
GO:0033137~negative regulation of peptidyl-serine phosphorylation	6	0.0350787	0.894828	NA	NA	NA	NA	NA	NA	NA	NA	NA	NA	NA	NA
GO:0048365~Rac GTPase binding	8	0.0353882	0.716639	17	0.0205409	0.777566	NA	NA	NA	NA	NA	NA	NA	NA	NA
mmu04916:Melanogenesis	13	0.0360557	0.264206	30	0.0172633	0.210482	30	0.0369533	0.311086	NA	NA	NA	36	0.00486028	0.0636254
GO:0016324~apical plasma membrane	28	0.0375119	0.473356	NA	NA	NA	NA	NA	NA	NA	NA	NA	NA	NA	NA
GO:0097120~receptor localization to synapse	4	0.0375738	0.906875	NA	NA	NA	NA	NA	NA	NA	NA	NA	NA	NA	NA
GO:0045599~negative regulation of fat cell differentiation	8	0.0376087	0.903266	NA	NA	NA	NA	NA	NA	NA	NA	NA	NA	NA	NA
mmu05332:Graft-versus-host disease	6	0.0378187	0.268043	NA	NA	NA	NA	NA	NA	NA	NA	NA	NA	NA	NA
GO:0070852~cell body fiber	4	0.0378735	0.467167	NA	NA	NA	7	0.0205326	0.380073	NA	NA	NA	7	0.0342637	0.674732
GO:0045165~cell fate commitment	9	0.038452	0.904572	NA	NA	NA	NA	NA	NA	NA	NA	NA	NA	NA	NA
GO:0048172~regulation of short-term neuronal synaptic plasticity	5	0.038706	0.902357	NA	NA	NA	NA	NA	NA	NA	NA	NA	NA	NA	NA
GO:0045666~positive regulation of neuron differentiation	12	0.0391313	0.901192	NA	NA	NA	29	0.0234774	0.917697	NA	NA	NA	NA	NA	NA
GO:0006874~cellular calcium ion homeostasis	12	0.0391313	0.901192	28	0.0238235	0.920777	NA	NA	NA	NA	NA	NA	NA	NA	NA
GO:0030534~adult behavior	7	0.040092	0.903181	NA	NA	NA	16	0.00919522	0.769854	NA	NA	NA	16	0.0239139	1
GO:0050714~positive regulation of protein secretion	7	0.040092	0.903181	NA	NA	NA	NA	NA	NA	NA	NA	NA	NA	NA	NA
GO:0005262~calcium channel activity	11	0.0401785	0.751031	26	0.0148982	0.677152	32	0.000268033	0.0851535	NA	NA	NA	30	0.007759	0.689116
GO:0005576~extracellular region	89	0.0402088	0.478521	251	0.046427	0.610103	NA	NA	NA	90	1.36246e-08	3.17453e-06	NA	NA	NA
GO:0043113~receptor clustering	6	0.0411263	0.905484	NA	NA	NA	NA	NA	NA	NA	NA	NA	NA	NA	NA
GO:0086091~regulation of heart rate by cardiac conduction	6	0.0411263	0.905484	15	0.000617112	0.251444	14	0.00565599	0.702706	NA	NA	NA	13	0.0262157	1
GO:0010629~negative regulation of gene expression	22	0.0413872	0.903455	NA	NA	NA	NA	NA	NA	NA	NA	NA	NA	NA	NA
GO:0005929~cilium	26	0.0417963	0.482903	NA	NA	NA	NA	NA	NA	NA	NA	NA	NA	NA	NA
GO:0010976~positive regulation of neuron projection development	17	0.0433625	0.910604	NA	NA	NA	NA	NA	NA	NA	NA	NA	NA	NA	NA
GO:0005938~cell cortex	17	0.0444327	0.495447	NA	NA	NA	NA	NA	NA	NA	NA	NA	48	0.0226471	0.538353
GO:0004721~phosphoprotein phosphatase activity	17	0.0449202	0.779338	NA	NA	NA	NA	NA	NA	NA	NA	NA	NA	NA	NA
GO:0016358~dendrite development	7	0.0455926	0.918232	NA	NA	NA	NA	NA	NA	NA	NA	NA	NA	NA	NA
GO:0060271~cilium morphogenesis	20	0.0458516	0.916374	NA	NA	NA	NA	NA	NA	NA	NA	NA	NA	NA	NA
GO:0048812~neuron projection morphogenesis	10	0.0459888	0.913959	NA	NA	NA	NA	NA	NA	NA	NA	NA	NA	NA	NA
GO:2000311~regulation of alpha-amino-3-hydroxy-5-methyl-4-isoxazole propionate selective glutamate receptor activity	5	0.0467868	0.914639	NA	NA	NA	10	0.0205395	0.903694	NA	NA	NA	NA	NA	NA
GO:0035855~megakaryocyte development	5	0.0467868	0.914639	NA	NA	NA	NA	NA	NA	NA	NA	NA	NA	NA	NA
GO:1900273~positive regulation of long-term synaptic potentiation	5	0.0467868	0.914639	NA	NA	NA	11	0.00581444	0.700472	NA	NA	NA	11	0.0126306	1
GO:0046982~protein heterodimerization activity	46	0.046967	0.784574	NA	NA	NA	NA	NA	NA	NA	NA	NA	NA	NA	NA
GO:0048013~ephrin receptor signaling pathway	8	0.0471601	0.913364	18	0.0178584	0.888981	NA	NA	NA	NA	NA	NA	NA	NA	NA
GO:0016328~lateral plasma membrane	8	0.0478315	0.512892	NA	NA	NA	NA	NA	NA	NA	NA	NA	20	0.0219957	0.538353
GO:0090129~positive regulation of synapse maturation	4	0.048737	0.917484	NA	NA	NA	NA	NA	NA	NA	NA	NA	NA	NA	NA
GO:0060307~regulation of ventricular cardiac muscle cell membrane repolarization	4	0.048737	0.917484	7	0.0290037	0.949805	NA	NA	NA	NA	NA	NA	NA	NA	NA
GO:0043229~intracellular organelle	4	0.0491166	0.513765	NA	NA	NA	7	0.0356599	0.484797	NA	NA	NA	NA	NA	NA
mmu04260:Cardiac muscle contraction	11	0.0494431	0.328321	NA	NA	NA	28	0.00806905	0.121183	NA	NA	NA	NA	NA	NA
mmu05150:Staphylococcus aureus infection	7	0.0494797	0.320612	NA	NA	NA	NA	NA	NA	NA	NA	NA	NA	NA	NA
GO:0005230~extracellular ligand-gated ion channel activity	6	0.0499946	0.796057	13	0.0124625	0.626162	15	0.00191131	0.254091	NA	NA	NA	17	0.000410947	0.138629
GO:0060291~long-term synaptic potentiation	NA	NA	NA	27	7.13186e-06	0.0143945	24	0.000564135	0.196465	NA	NA	NA	27	7.26967e-05	0.0519216
GO:0006813~potassium ion transport	NA	NA	NA	47	1.28975e-05	0.0156094	51	1.14081e-06	0.00176726	NA	NA	NA	48	0.000287362	0.13194
GO:0048167~regulation of synaptic plasticity	NA	NA	NA	24	1.8939e-05	0.0190676	19	0.00944532	0.770409	9	0.00127875	0.323607	23	0.000713666	0.26985
GO:0019233~sensory perception of pain	NA	NA	NA	31	2.75092e-05	0.0236837	29	0.000939746	0.252897	9	0.0161264	0.832766	33	6.96179e-05	0.0519216
GO:0048168~regulation of neuronal synaptic plasticity	NA	NA	NA	16	3.42308e-05	0.0257596	13	0.00502735	0.685796	NA	NA	NA	14	0.00373299	0.86175
GO:0005829~cytosol	NA	NA	NA	448	8.08491e-05	0.0058972	440	0.0112916	0.269532	NA	NA	NA	494	0.00235048	0.120345
GO:0071805~potassium ion transmembrane transport	NA	NA	NA	33	0.000405104	0.218955	34	0.000540287	0.200246	NA	NA	NA	33	0.00556918	1
GO:0007612~learning	NA	NA	NA	29	0.000433509	0.213697	26	0.0101801	0.787288	NA	NA	NA	33	0.00015233	0.0753212
GO:0017075~syntaxin-1 binding	NA	NA	NA	14	0.000527905	0.180337	13	0.00349018	0.352921	NA	NA	NA	15	0.000586345	0.152816
GO:0005543~phospholipid binding	NA	NA	NA	31	0.000666308	0.18875	NA	NA	NA	NA	NA	NA	NA	NA	NA
GO:0030426~growth cone	NA	NA	NA	56	0.00071168	0.0390437	58	0.000612933	0.0343094	NA	NA	NA	60	0.00292962	0.142854
GO:0019228~neuronal action potential	NA	NA	NA	16	0.00074232	0.276393	22	1.28026e-07	0.000396929	NA	NA	NA	19	3.22792e-05	0.0317995
GO:1990138~neuron projection extension	NA	NA	NA	14	0.000859754	0.295119	12	0.015917	0.852464	NA	NA	NA	NA	NA	NA
GO:0030431~sleep	NA	NA	NA	8	0.00106398	0.333551	NA	NA	NA	NA	NA	NA	NA	NA	NA
GO:0021549~cerebellum development	NA	NA	NA	20	0.00106748	0.31831	NA	NA	NA	NA	NA	NA	18	0.0341627	1
GO:0042734~presynaptic membrane	NA	NA	NA	30	0.00106881	0.0549326	30	0.00210977	0.0850516	NA	NA	NA	30	0.0106747	0.33124
GO:0007157~heterophilic cell-cell adhesion via plasma membrane cell adhesion molecules	NA	NA	NA	21	0.00110621	0.312731	19	0.0124851	0.82299	NA	NA	NA	20	0.016595	1
GO:0019905~syntaxin binding	NA	NA	NA	32	0.00111159	0.230324	NA	NA	NA	NA	NA	NA	34	0.00334708	0.498475
GO:0048666~neuron development	NA	NA	NA	23	0.00114317	0.307307	NA	NA	NA	NA	NA	NA	22	0.0137869	1
GO:0043523~regulation of neuron apoptotic process	NA	NA	NA	16	0.00119698	0.305969	15	0.00614592	0.697245	NA	NA	NA	14	0.0387877	1
GO:0035640~exploration behavior	NA	NA	NA	11	0.00121682	0.297855	NA	NA	NA	NA	NA	NA	NA	NA	NA
mmu04971:Gastric acid secretion	NA	NA	NA	26	0.00135961	0.0625816	25	0.00919707	0.130265	NA	NA	NA	28	0.00298166	0.042936
GO:0007271~synaptic transmission, cholinergic	NA	NA	NA	12	0.00166709	0.370323	10	0.0304509	0.947694	5	0.0124899	0.807159	12	0.00593389	1
mmu04721:Synaptic vesicle cycle	NA	NA	NA	24	0.00197332	0.0679502	NA	NA	NA	NA	NA	NA	NA	NA	NA
GO:0086010~membrane depolarization during action potential	NA	NA	NA	13	0.00205942	0.421124	15	0.000312146	0.176031	NA	NA	NA	14	0.00217688	0.636045
GO:0097060~synaptic membrane	NA	NA	NA	17	0.00206698	0.0983823	NA	NA	NA	NA	NA	NA	16	0.0241838	0.538353
GO:0031594~neuromuscular junction	NA	NA	NA	26	0.00209233	0.0947956	NA	NA	NA	NA	NA	NA	NA	NA	NA
GO:0017146~NMDA selective glutamate receptor complex	NA	NA	NA	9	0.0022132	0.095468	9	0.00293645	0.100064	NA	NA	NA	8	0.026729	0.570218
GO:0048306~calcium-dependent protein binding	NA	NA	NA	26	0.00229273	0.350932	25	0.00985614	0.5605	NA	NA	NA	28	0.00419545	0.536704
GO:0030057~desmosome	NA	NA	NA	11	0.00237431	0.097654	11	0.00329934	0.104445	NA	NA	NA	NA	NA	NA
GO:0043195~terminal bouton	NA	NA	NA	37	0.00244547	0.0962826	NA	NA	NA	NA	NA	NA	NA	NA	NA
GO:0007613~memory	NA	NA	NA	30	0.00279733	0.509273	30	0.00699883	0.71193	9	0.0409982	0.931247	33	0.00341233	0.843633
GO:0008542~visual learning	NA	NA	NA	24	0.00281569	0.497362	23	0.011311	0.798793	NA	NA	NA	30	9.15235e-05	0.053483
GO:0007399~nervous system development	NA	NA	NA	105	0.00286421	0.489744	105	0.0106822	0.787542	26	0.0477298	0.935736	121	0.00120309	0.407025
GO:0051930~regulation of sensory perception of pain	NA	NA	NA	18	0.00301499	0.494436	19	0.00368005	0.614317	NA	NA	NA	18	0.0148067	1
mmu05033:Nicotine addiction	NA	NA	NA	17	0.00322576	0.0879704	20	0.000191347	0.00781529	NA	NA	NA	20	0.000799619	0.0153527
GO:0005892~acetylcholine-gated channel complex	NA	NA	NA	7	0.00352905	0.130716	NA	NA	NA	NA	NA	NA	7	0.00782311	0.286102
GO:0042923~neuropeptide binding	NA	NA	NA	11	0.00440156	0.53005	9	0.045433	0.889783	NA	NA	NA	NA	NA	NA
GO:0005267~potassium channel activity	NA	NA	NA	27	0.00474179	0.497653	28	0.00448569	0.391971	NA	NA	NA	28	0.0184663	1
GO:0045778~positive regulation of ossification	NA	NA	NA	12	0.00477624	0.622179	NA	NA	NA	NA	NA	NA	NA	NA	NA
GO:0006749~glutathione metabolic process	NA	NA	NA	20	0.00560611	0.66914	NA	NA	NA	NA	NA	NA	NA	NA	NA
GO:0043296~apical junction complex	NA	NA	NA	10	0.00591146	0.194961	NA	NA	NA	NA	NA	NA	NA	NA	NA
GO:0008013~beta-catenin binding	NA	NA	NA	31	0.00591403	0.525082	35	0.000689349	0.178182	NA	NA	NA	38	0.000465421	0.138629
GO:0098793~presynapse	NA	NA	NA	24	0.00643223	0.20331	NA	NA	NA	NA	NA	NA	NA	NA	NA
GO:0048511~rhythmic process	NA	NA	NA	43	0.00652016	0.701501	42	0.0234879	0.914294	NA	NA	NA	55	8.23211e-05	0.052916
mmu04925:Aldosterone synthesis and secretion	NA	NA	NA	27	0.00717825	0.136409	29	0.00389829	0.0769492	NA	NA	NA	33	0.00091885	0.0165393
GO:0006887~exocytosis	NA	NA	NA	34	0.00753644	0.732397	NA	NA	NA	NA	NA	NA	40	0.00204081	0.624682
GO:0017124~SH3 domain binding	NA	NA	NA	40	0.00810818	0.616387	44	0.00148998	0.236638	NA	NA	NA	46	0.004376	0.536704
GO:0035095~behavioral response to nicotine	NA	NA	NA	7	0.00828978	0.746443	NA	NA	NA	NA	NA	NA	7	0.0178021	1
GO:0008179~adenylate cyclase binding	NA	NA	NA	9	0.00869786	0.599032	8	0.0428268	0.880761	NA	NA	NA	9	0.0221869	1
GO:0035254~glutamate receptor binding	NA	NA	NA	9	0.00869786	0.599032	10	0.00253926	0.303551	NA	NA	NA	11	0.00100566	0.232978
GO:0050839~cell adhesion molecule binding	NA	NA	NA	23	0.0093104	0.604274	NA	NA	NA	NA	NA	NA	25	0.0136826	0.932762
GO:0014704~intercalated disc	NA	NA	NA	20	0.0100235	0.281334	24	0.000377808	0.0226024	NA	NA	NA	22	0.0106229	0.33124
GO:0030506~ankyrin binding	NA	NA	NA	10	0.0103266	0.623676	11	0.00368632	0.351276	NA	NA	NA	NA	NA	NA
GO:0019226~transmission of nerve impulse	NA	NA	NA	11	0.0106832	0.821628	NA	NA	NA	NA	NA	NA	NA	NA	NA
mmu04070:Phosphatidylinositol signaling system	NA	NA	NA	33	0.0111933	0.181683	32	0.0432812	0.304285	NA	NA	NA	NA	NA	NA
GO:0046686~response to cadmium ion	NA	NA	NA	12	0.0112742	0.822503	12	0.015917	0.852464	NA	NA	NA	13	0.0121247	1
mmu03320:PPAR signaling pathway	NA	NA	NA	21	0.0113411	0.174046	NA	NA	NA	NA	NA	NA	NA	NA	NA
GO:0047372~acylglycerol lipase activity	NA	NA	NA	6	0.0114333	0.643382	NA	NA	NA	NA	NA	NA	NA	NA	NA
GO:0032092~positive regulation of protein binding	NA	NA	NA	25	0.0115608	0.822672	NA	NA	NA	NA	NA	NA	NA	NA	NA
GO:0051764~actin crosslink formation	NA	NA	NA	8	0.0116285	0.817045	NA	NA	NA	NA	NA	NA	NA	NA	NA
GO:0005515~protein binding	NA	NA	NA	913	0.0123702	0.639066	NA	NA	NA	NA	NA	NA	1061	0.00492383	0.545297
GO:0045499~chemorepellent activity	NA	NA	NA	13	0.0124625	0.626162	NA	NA	NA	NA	NA	NA	NA	NA	NA
GO:0005776~autophagosome	NA	NA	NA	24	0.0127991	0.32644	28	0.000909246	0.0477422	NA	NA	NA	30	0.000904434	0.0514523
GO:0030308~negative regulation of cell growth	NA	NA	NA	38	0.0130014	0.836997	NA	NA	NA	NA	NA	NA	NA	NA	NA
GO:2000650~negative regulation of sodium ion transmembrane transporter activity	NA	NA	NA	5	0.0136639	0.845054	NA	NA	NA	NA	NA	NA	NA	NA	NA
GO:0048732~gland development	NA	NA	NA	5	0.0136639	0.845054	NA	NA	NA	NA	NA	NA	NA	NA	NA
GO:0043209~myelin sheath	NA	NA	NA	60	0.0146059	0.354203	NA	NA	NA	NA	NA	NA	NA	NA	NA
GO:0007528~neuromuscular junction development	NA	NA	NA	16	0.0150962	0.866922	NA	NA	NA	NA	NA	NA	NA	NA	NA
GO:1903861~positive regulation of dendrite extension	NA	NA	NA	10	0.0152909	0.864607	NA	NA	NA	NA	NA	NA	NA	NA	NA
GO:0048814~regulation of dendrite morphogenesis	NA	NA	NA	11	0.0160532	0.872076	11	0.0219767	0.91089	NA	NA	NA	12	0.0155795	1
GO:0086005~ventricular cardiac muscle cell action potential	NA	NA	NA	7	0.0165163	0.874185	NA	NA	NA	NA	NA	NA	NA	NA	NA
GO:0032590~dendrite membrane	NA	NA	NA	12	0.0167165	0.384803	NA	NA	NA	NA	NA	NA	14	0.00614957	0.251886
GO:0044297~cell body	NA	NA	NA	33	0.0169376	0.379862	37	0.00274424	0.0972509	NA	NA	NA	38	0.00927552	0.327522
mmu05231:Choline metabolism in cancer	NA	NA	NA	32	0.019947	0.229732	NA	NA	NA	NA	NA	NA	NA	NA	NA
GO:0002089~lens morphogenesis in camera-type eye	NA	NA	NA	8	0.0200055	0.910783	NA	NA	NA	NA	NA	NA	NA	NA	NA
mmu00480:Glutathione metabolism	NA	NA	NA	19	0.0209242	0.230511	NA	NA	NA	NA	NA	NA	NA	NA	NA
GO:0045956~positive regulation of calcium ion-dependent exocytosis	NA	NA	NA	9	0.0219903	0.918845	NA	NA	NA	NA	NA	NA	11	0.00409505	0.90769
GO:0031226~intrinsic component of plasma membrane	NA	NA	NA	13	0.0229308	0.467577	NA	NA	NA	NA	NA	NA	NA	NA	NA
GO:0016079~synaptic vesicle exocytosis	NA	NA	NA	10	0.0229396	0.923726	NA	NA	NA	NA	NA	NA	12	0.00593389	1
GO:0048843~negative regulation of axon extension involved in axon guidance	NA	NA	NA	12	0.0229612	0.920331	NA	NA	NA	NA	NA	NA	NA	NA	NA
GO:0031032~actomyosin structure organization	NA	NA	NA	12	0.0229612	0.920331	NA	NA	NA	NA	NA	NA	NA	NA	NA
GO:0017157~regulation of exocytosis	NA	NA	NA	12	0.0229612	0.920331	12	0.0316452	0.944445	NA	NA	NA	15	0.00295823	0.760621
GO:0097440~apical dendrite	NA	NA	NA	10	0.0233715	0.464592	12	0.00244645	0.090484	NA	NA	NA	NA	NA	NA
GO:0015629~actin cytoskeleton	NA	NA	NA	58	0.0233987	0.455865	NA	NA	NA	NA	NA	NA	NA	NA	NA
GO:0006048~UDP-N-acetylglucosamine biosynthetic process	NA	NA	NA	6	0.0234555	0.921105	NA	NA	NA	NA	NA	NA	NA	NA	NA
GO:0032839~dendrite cytoplasm	NA	NA	NA	11	0.0236539	0.450685	NA	NA	NA	NA	NA	NA	12	0.0236297	0.538353
GO:0042803~protein homodimerization activity	NA	NA	NA	187	0.0237411	0.812822	NA	NA	NA	NA	NA	NA	NA	NA	NA
GO:0036477~somatodendritic compartment	NA	NA	NA	6	0.0237501	0.44352	NA	NA	NA	NA	NA	NA	NA	NA	NA
GO:0001533~cornified envelope	NA	NA	NA	6	0.0237501	0.44352	NA	NA	NA	NA	NA	NA	NA	NA	NA
mmu04514:Cell adhesion molecules (CAMs)	NA	NA	NA	35	0.0238051	0.248816	35	0.0406796	0.303151	NA	NA	NA	NA	NA	NA
GO:0007264~small GTPase mediated signal transduction	NA	NA	NA	67	0.0238373	0.917419	78	0.000631188	0.195511	NA	NA	NA	84	0.000851535	0.304093
GO:0004972~NMDA glutamate receptor activity	NA	NA	NA	6	0.0243996	0.798897	6	0.0299731	0.797142	NA	NA	NA	6	0.0457376	1
GO:0004889~acetylcholine-activated cation-selective channel activity	NA	NA	NA	6	0.0243996	0.798897	NA	NA	NA	NA	NA	NA	6	0.0457376	1
GO:0008066~glutamate receptor activity	NA	NA	NA	6	0.0243996	0.798897	6	0.0299731	0.797142	NA	NA	NA	6	0.0457376	1
mmu04740:Olfactory transduction	NA	NA	NA	11	0.0275779	0.272982	NA	NA	NA	NA	NA	NA	NA	NA	NA
GO:0031629~synaptic vesicle fusion to presynaptic active zone membrane	NA	NA	NA	7	0.0290037	0.949805	NA	NA	NA	NA	NA	NA	NA	NA	NA
GO:0030017~sarcomere	NA	NA	NA	14	0.0292975	0.506857	14	0.0400587	0.506728	NA	NA	NA	15	0.0409299	0.753772
GO:0051015~actin filament binding	NA	NA	NA	40	0.029963	0.851835	48	0.000862413	0.173837	NA	NA	NA	47	0.0128335	0.922683
GO:0003341~cilium movement	NA	NA	NA	13	0.0300468	0.952652	NA	NA	NA	NA	NA	NA	NA	NA	NA
GO:0048268~clathrin coat assembly	NA	NA	NA	8	0.0318136	0.958431	NA	NA	NA	NA	NA	NA	NA	NA	NA
GO:0035235~ionotropic glutamate receptor signaling pathway	NA	NA	NA	8	0.0318136	0.958431	NA	NA	NA	NA	NA	NA	NA	NA	NA
GO:0007187~G-protein coupled receptor signaling pathway, coupled to cyclic nucleotide second messenger	NA	NA	NA	8	0.0318136	0.958431	NA	NA	NA	4	0.0334124	0.914507	NA	NA	NA
GO:0050966~detection of mechanical stimulus involved in sensory perception of pain	NA	NA	NA	8	0.0318136	0.958431	10	0.00230745	0.463629	NA	NA	NA	10	0.00497797	1
GO:1901379~regulation of potassium ion transmembrane transport	NA	NA	NA	8	0.0318136	0.958431	8	0.0401523	0.964713	NA	NA	NA	9	0.0207022	1
GO:0051568~histone H3-K4 methylation	NA	NA	NA	8	0.0318136	0.958431	NA	NA	NA	NA	NA	NA	NA	NA	NA
GO:0044325~ion channel binding	NA	NA	NA	37	0.0328358	0.85979	42	0.00869846	0.563393	NA	NA	NA	44	0.011019	0.850911
GO:0015012~heparan sulfate proteoglycan biosynthetic process	NA	NA	NA	9	0.0329213	0.960865	NA	NA	NA	NA	NA	NA	NA	NA	NA
GO:0060292~long term synaptic depression	NA	NA	NA	9	0.0329213	0.960865	NA	NA	NA	NA	NA	NA	NA	NA	NA
GO:0051963~regulation of synapse assembly	NA	NA	NA	5	0.0331644	0.959807	5	0.0388782	0.963971	NA	NA	NA	NA	NA	NA
GO:0051534~negative regulation of NFAT protein import into nucleus	NA	NA	NA	5	0.0331644	0.959807	NA	NA	NA	NA	NA	NA	NA	NA	NA
GO:0086073~bundle of His cell-Purkinje myocyte adhesion involved in cell communication	NA	NA	NA	5	0.0331644	0.959807	NA	NA	NA	NA	NA	NA	NA	NA	NA
GO:0031430~M band	NA	NA	NA	9	0.0334718	0.546007	NA	NA	NA	NA	NA	NA	NA	NA	NA
GO:0032051~clathrin light chain binding	NA	NA	NA	5	0.0342667	0.863245	NA	NA	NA	NA	NA	NA	NA	NA	NA
GO:0004683~calmodulin-dependent protein kinase activity	NA	NA	NA	10	0.0348745	0.859972	12	0.00472576	0.391423	NA	NA	NA	13	0.00300228	0.481519
GO:0017016~Ras GTPase binding	NA	NA	NA	10	0.0348745	0.859972	NA	NA	NA	NA	NA	NA	12	0.0108274	0.850911
mmu05217:Basal cell carcinoma	NA	NA	NA	18	0.0348835	0.312567	NA	NA	NA	NA	NA	NA	NA	NA	NA
GO:0000149~SNARE binding	NA	NA	NA	22	0.0348986	0.852081	NA	NA	NA	NA	NA	NA	24	0.0495378	1
GO:0071277~cellular response to calcium ion	NA	NA	NA	18	0.0353326	0.965791	NA	NA	NA	NA	NA	NA	NA	NA	NA
GO:0030175~filopodium	NA	NA	NA	25	0.0367647	0.563262	NA	NA	NA	NA	NA	NA	28	0.0429077	0.753772
GO:0008021~synaptic vesicle	NA	NA	NA	39	0.0378761	0.565929	42	0.0150399	0.327307	NA	NA	NA	45	0.0239318	0.538353
GO:0005200~structural constituent of cytoskeleton	NA	NA	NA	23	0.0387019	0.865842	26	0.00958831	0.565881	NA	NA	NA	27	0.0181808	1
GO:0043679~axon terminus	NA	NA	NA	26	0.0398904	0.576961	31	0.00337718	0.103408	NA	NA	NA	32	0.00702203	0.266317
GO:0008270~zinc ion binding	NA	NA	NA	244	0.0402979	0.86275	NA	NA	NA	NA	NA	NA	NA	NA	NA
GO:0007411~axon guidance	NA	NA	NA	42	0.0412112	0.978311	NA	NA	NA	13	0.0407772	0.934513	50	0.0117542	1
GO:0019904~protein domain specific binding	NA	NA	NA	76	0.0421181	0.868095	NA	NA	NA	NA	NA	NA	86	0.0473547	1
GO:0044342~type B pancreatic cell proliferation	NA	NA	NA	6	0.0424127	0.979495	NA	NA	NA	NA	NA	NA	NA	NA	NA
GO:0098911~regulation of ventricular cardiac muscle cell action potential	NA	NA	NA	6	0.0424127	0.979495	NA	NA	NA	NA	NA	NA	NA	NA	NA
GO:0009410~response to xenobiotic stimulus	NA	NA	NA	6	0.0424127	0.979495	NA	NA	NA	NA	NA	NA	NA	NA	NA
GO:0008016~regulation of heart contraction	NA	NA	NA	11	0.0437771	0.980875	NA	NA	NA	NA	NA	NA	NA	NA	NA
GO:0055010~ventricular cardiac muscle tissue morphogenesis	NA	NA	NA	11	0.0437771	0.980875	NA	NA	NA	NA	NA	NA	NA	NA	NA
GO:0090002~establishment of protein localization to plasma membrane	NA	NA	NA	15	0.0439374	0.980056	NA	NA	NA	NA	NA	NA	NA	NA	NA
GO:0007193~adenylate cyclase-inhibiting G-protein coupled receptor signaling pathway	NA	NA	NA	15	0.0439374	0.980056	NA	NA	NA	NA	NA	NA	NA	NA	NA
GO:0016310~phosphorylation	NA	NA	NA	155	0.0439964	0.979037	NA	NA	NA	NA	NA	NA	NA	NA	NA
GO:0042166~acetylcholine binding	NA	NA	NA	6	0.0440226	0.867138	NA	NA	NA	NA	NA	NA	NA	NA	NA
mmu04750:Inflammatory mediator regulation of TRP channels	NA	NA	NA	28	0.044655	0.352079	30	0.0269933	0.269585	NA	NA	NA	34	0.0113095	0.125275
GO:0051259~protein oligomerization	NA	NA	NA	22	0.0452718	0.979155	NA	NA	NA	NA	NA	NA	NA	NA	NA
GO:0010107~potassium ion import	NA	NA	NA	10	0.0456532	0.978748	NA	NA	NA	NA	NA	NA	NA	NA	NA
GO:0051966~regulation of synaptic transmission, glutamatergic	NA	NA	NA	10	0.0456532	0.978748	NA	NA	NA	NA	NA	NA	NA	NA	NA
GO:0060159~regulation of dopamine receptor signaling pathway	NA	NA	NA	4	0.0460074	0.978293	NA	NA	NA	NA	NA	NA	NA	NA	NA
GO:0046596~regulation of viral entry into host cell	NA	NA	NA	4	0.0460074	0.978293	NA	NA	NA	NA	NA	NA	NA	NA	NA
GO:0033555~multicellular organismal response to stress	NA	NA	NA	7	0.046379	0.977874	8	0.0150204	0.841255	NA	NA	NA	NA	NA	NA
GO:0006337~nucleosome disassembly	NA	NA	NA	7	0.046379	0.977874	NA	NA	NA	NA	NA	NA	NA	NA	NA
GO:0061001~regulation of dendritic spine morphogenesis	NA	NA	NA	7	0.046379	0.977874	NA	NA	NA	NA	NA	NA	NA	NA	NA
GO:0016323~basolateral plasma membrane	NA	NA	NA	51	0.0469429	0.606689	54	0.0268196	0.428741	NA	NA	NA	60	0.0178029	0.492708
GO:0048148~behavioral response to cocaine	NA	NA	NA	9	0.0470256	0.977967	NA	NA	NA	5	0.0124899	0.807159	11	0.0126306	1
GO:1900006~positive regulation of dendrite development	NA	NA	NA	9	0.0470256	0.977967	NA	NA	NA	NA	NA	NA	NA	NA	NA
GO:0071526~semaphorin-plexin signaling pathway	NA	NA	NA	14	0.0471638	0.977124	16	0.0126816	0.807767	NA	NA	NA	16	0.0319761	1
GO:0070840~dynein complex binding	NA	NA	NA	4	0.0472085	0.87969	NA	NA	NA	NA	NA	NA	NA	NA	NA
GO:0014912~negative regulation of smooth muscle cell migration	NA	NA	NA	8	0.0474972	0.976643	NA	NA	NA	NA	NA	NA	NA	NA	NA
GO:0032230~positive regulation of synaptic transmission, GABAergic	NA	NA	NA	8	0.0474972	0.976643	NA	NA	NA	NA	NA	NA	10	0.00937346	1
GO:1901214~regulation of neuron death	NA	NA	NA	8	0.0474972	0.976643	NA	NA	NA	NA	NA	NA	NA	NA	NA
GO:0030215~semaphorin receptor binding	NA	NA	NA	10	0.0481827	0.879166	NA	NA	NA	NA	NA	NA	NA	NA	NA
GO:0004970~ionotropic glutamate receptor activity	NA	NA	NA	9	0.0494324	0.88013	NA	NA	NA	NA	NA	NA	10	0.0420728	1
GO:0005234~extracellular-glutamate-gated ion channel activity	NA	NA	NA	9	0.0494324	0.88013	NA	NA	NA	NA	NA	NA	10	0.0420728	1
GO:0019901~protein kinase binding	NA	NA	NA	114	0.0497483	0.870541	121	0.0294059	0.799491	NA	NA	NA	139	0.00523067	0.545297
GO:0007616~long-term memory	NA	NA	NA	NA	NA	NA	18	0.000667564	0.195858	NA	NA	NA	17	0.0067454	1
GO:0005261~cation channel activity	NA	NA	NA	NA	NA	NA	18	0.000781033	0.176798	NA	NA	NA	18	0.00168853	0.352059
GO:0043194~axon initial segment	NA	NA	NA	NA	NA	NA	10	0.00105141	0.0496405	NA	NA	NA	8	0.0441335	0.753772
GO:0006810~transport	NA	NA	NA	NA	NA	NA	445	0.00112091	0.281959	NA	NA	NA	473	0.0191689	1
GO:0031402~sodium ion binding	NA	NA	NA	NA	NA	NA	10	0.00117281	0.208449	NA	NA	NA	9	0.012602	0.922683
GO:0005248~voltage-gated sodium channel activity	NA	NA	NA	NA	NA	NA	12	0.00150881	0.221707	NA	NA	NA	11	0.0081499	0.689116
GO:0034220~ion transmembrane transport	NA	NA	NA	NA	NA	NA	16	0.00196077	0.424951	NA	NA	NA	15	0.0159212	1
GO:0033268~node of Ranvier	NA	NA	NA	NA	NA	NA	10	0.00228544	0.0881548	NA	NA	NA	9	0.0208596	0.538353
GO:0043691~reverse cholesterol transport	NA	NA	NA	NA	NA	NA	7	0.00444721	0.65465	NA	NA	NA	NA	NA	NA
GO:1902287~semaphorin-plexin signaling pathway involved in axon guidance	NA	NA	NA	NA	NA	NA	9	0.00600274	0.700174	NA	NA	NA	8	0.0438538	1
GO:0019221~cytokine-mediated signaling pathway	NA	NA	NA	NA	NA	NA	33	0.00617742	0.687947	NA	NA	NA	NA	NA	NA
GO:0007628~adult walking behavior	NA	NA	NA	NA	NA	NA	18	0.00693696	0.71911	6	0.0459844	0.936353	17	0.0428433	1
GO:0007163~establishment or maintenance of cell polarity	NA	NA	NA	NA	NA	NA	13	0.00777216	0.739252	NA	NA	NA	NA	NA	NA
GO:0034705~potassium channel complex	NA	NA	NA	NA	NA	NA	8	0.00792646	0.213947	NA	NA	NA	NA	NA	NA
GO:0021785~branchiomotor neuron axon guidance	NA	NA	NA	NA	NA	NA	8	0.00798647	0.73922	NA	NA	NA	NA	NA	NA
GO:0045176~apical protein localization	NA	NA	NA	NA	NA	NA	8	0.00798647	0.73922	NA	NA	NA	NA	NA	NA
GO:0006821~chloride transport	NA	NA	NA	NA	NA	NA	24	0.0086246	0.756766	NA	NA	NA	NA	NA	NA
GO:0072659~protein localization to plasma membrane	NA	NA	NA	NA	NA	NA	24	0.0086246	0.756766	NA	NA	NA	24	0.0293904	1
GO:0060076~excitatory synapse	NA	NA	NA	NA	NA	NA	17	0.00926002	0.238826	NA	NA	NA	19	0.0042135	0.196119
GO:0002116~semaphorin receptor complex	NA	NA	NA	NA	NA	NA	7	0.0104223	0.257912	NA	NA	NA	NA	NA	NA
GO:0034375~high-density lipoprotein particle remodeling	NA	NA	NA	NA	NA	NA	7	0.0104921	0.789341	NA	NA	NA	NA	NA	NA
GO:0030863~cortical cytoskeleton	NA	NA	NA	NA	NA	NA	13	0.0114432	0.266163	NA	NA	NA	13	0.0264694	0.570218
GO:0046426~negative regulation of JAK-STAT cascade	NA	NA	NA	NA	NA	NA	15	0.0125016	0.816614	NA	NA	NA	16	0.012444	1
GO:0045773~positive regulation of axon extension	NA	NA	NA	NA	NA	NA	18	0.0126461	0.813513	NA	NA	NA	NA	NA	NA
GO:0048841~regulation of axon extension involved in axon guidance	NA	NA	NA	NA	NA	NA	6	0.0134342	0.819481	NA	NA	NA	NA	NA	NA
GO:0033135~regulation of peptidyl-serine phosphorylation	NA	NA	NA	NA	NA	NA	6	0.0134342	0.819481	NA	NA	NA	NA	NA	NA
GO:0005884~actin filament	NA	NA	NA	NA	NA	NA	26	0.0153599	0.325855	NA	NA	NA	NA	NA	NA
GO:0005856~cytoskeleton	NA	NA	NA	NA	NA	NA	289	0.0179357	0.354663	NA	NA	NA	NA	NA	NA
mmu04911:Insulin secretion	NA	NA	NA	NA	NA	NA	27	0.0191698	0.232434	NA	NA	NA	NA	NA	NA
mmu04144:Endocytosis	NA	NA	NA	NA	NA	NA	72	0.0193049	0.224544	NA	NA	NA	82	0.00594102	0.0743918
GO:0007409~axonogenesis	NA	NA	NA	NA	NA	NA	35	0.0197091	0.898352	12	0.0120396	0.810901	36	0.0499997	1
GO:0015269~calcium-activated potassium channel activity	NA	NA	NA	NA	NA	NA	9	0.0197539	0.758144	NA	NA	NA	NA	NA	NA
GO:0015813~L-glutamate transport	NA	NA	NA	NA	NA	NA	7	0.0206632	0.900979	NA	NA	NA	7	0.0340618	1
GO:0070201~regulation of establishment of protein localization	NA	NA	NA	NA	NA	NA	7	0.0206632	0.900979	NA	NA	NA	NA	NA	NA
GO:0007026~negative regulation of microtubule depolymerization	NA	NA	NA	NA	NA	NA	11	0.0219767	0.91089	NA	NA	NA	NA	NA	NA
GO:0043008~ATP-dependent protein binding	NA	NA	NA	NA	NA	NA	7	0.0219932	0.782936	NA	NA	NA	NA	NA	NA
mmu04970:Salivary secretion	NA	NA	NA	NA	NA	NA	24	0.0227527	0.249634	NA	NA	NA	25	0.0469916	0.400752
GO:0033017~sarcoplasmic reticulum membrane	NA	NA	NA	NA	NA	NA	13	0.0229648	0.407263	NA	NA	NA	NA	NA	NA
GO:0005254~chloride channel activity	NA	NA	NA	NA	NA	NA	19	0.0236003	0.784478	NA	NA	NA	NA	NA	NA
GO:0005085~guanyl-nucleotide exchange factor activity	NA	NA	NA	NA	NA	NA	52	0.0241241	0.771009	NA	NA	NA	NA	NA	NA
GO:0045121~membrane raft	NA	NA	NA	NA	NA	NA	72	0.0244731	0.420219	22	0.00806444	0.222406	81	0.00998309	0.329834
GO:0045177~apical part of cell	NA	NA	NA	NA	NA	NA	36	0.0248195	0.417619	NA	NA	NA	NA	NA	NA
GO:0043196~varicosity	NA	NA	NA	NA	NA	NA	8	0.0253657	0.417642	NA	NA	NA	NA	NA	NA
GO:0030507~spectrin binding	NA	NA	NA	NA	NA	NA	13	0.0255393	0.780355	NA	NA	NA	13	0.0397574	1
GO:0032228~regulation of synaptic transmission, GABAergic	NA	NA	NA	NA	NA	NA	8	0.0255411	0.927961	NA	NA	NA	NA	NA	NA
GO:0046983~protein dimerization activity	NA	NA	NA	NA	NA	NA	48	0.0265587	0.783898	NA	NA	NA	52	0.0251742	1
GO:0017154~semaphorin receptor activity	NA	NA	NA	NA	NA	NA	8	0.027333	0.784216	NA	NA	NA	NA	NA	NA
GO:0018095~protein polyglutamylation	NA	NA	NA	NA	NA	NA	6	0.0284126	0.941432	NA	NA	NA	6	0.0436422	1
GO:0051481~negative regulation of cytosolic calcium ion concentration	NA	NA	NA	NA	NA	NA	9	0.0286337	0.940113	NA	NA	NA	NA	NA	NA
GO:0001725~stress fiber	NA	NA	NA	NA	NA	NA	25	0.028913	0.4466	NA	NA	NA	NA	NA	NA
GO:0005912~adherens junction	NA	NA	NA	NA	NA	NA	21	0.0294755	0.446252	NA	NA	NA	25	0.00533896	0.2377
GO:0016307~phosphatidylinositol phosphate kinase activity	NA	NA	NA	NA	NA	NA	6	0.0299731	0.797142	NA	NA	NA	6	0.0457376	1
GO:0008023~transcription elongation factor complex	NA	NA	NA	NA	NA	NA	11	0.0311035	0.457587	NA	NA	NA	NA	NA	NA
GO:0046579~positive regulation of Ras protein signal transduction	NA	NA	NA	NA	NA	NA	11	0.0313666	0.947662	NA	NA	NA	NA	NA	NA
GO:0007205~protein kinase C-activating G-protein coupled receptor signaling pathway	NA	NA	NA	NA	NA	NA	11	0.0313666	0.947662	NA	NA	NA	NA	NA	NA
mmu04012:ErbB signaling pathway	NA	NA	NA	NA	NA	NA	30	0.0316759	0.299044	NA	NA	NA	33	0.0289479	0.308778
GO:0005737~cytoplasm	NA	NA	NA	NA	NA	NA	1486	0.0322793	0.457086	NA	NA	NA	1649	0.0232341	0.538353
mmu05010:Alzheimer's disease	NA	NA	NA	NA	NA	NA	51	0.0337338	0.30564	NA	NA	NA	NA	NA	NA
GO:0005070~SH3/SH2 adaptor activity	NA	NA	NA	NA	NA	NA	11	0.0340894	0.829931	NA	NA	NA	NA	NA	NA
GO:0051879~Hsp90 protein binding	NA	NA	NA	NA	NA	NA	14	0.0341701	0.822968	NA	NA	NA	16	0.0138684	0.932762
mmu05213:Endometrial cancer	NA	NA	NA	NA	NA	NA	20	0.0348764	0.305016	NA	NA	NA	21	0.049468	0.400752
GO:0007610~behavior	NA	NA	NA	NA	NA	NA	7	0.0358754	0.957022	NA	NA	NA	NA	NA	NA
GO:0006464~cellular protein modification process	NA	NA	NA	NA	NA	NA	16	0.0375486	0.961285	NA	NA	NA	NA	NA	NA
GO:0034707~chloride channel complex	NA	NA	NA	NA	NA	NA	15	0.0386554	0.506722	NA	NA	NA	16	0.0422889	0.753772
GO:0043219~lateral loop	NA	NA	NA	NA	NA	NA	5	0.0387018	0.500767	NA	NA	NA	NA	NA	NA
GO:0043266~regulation of potassium ion transport	NA	NA	NA	NA	NA	NA	5	0.0388782	0.963971	NA	NA	NA	NA	NA	NA
GO:0034720~histone H3-K4 demethylation	NA	NA	NA	NA	NA	NA	5	0.0388782	0.963971	NA	NA	NA	NA	NA	NA
GO:0008202~steroid metabolic process	NA	NA	NA	NA	NA	NA	23	0.0393281	0.963769	NA	NA	NA	29	0.00153863	0.494517
mmu04530:Tight junction	NA	NA	NA	NA	NA	NA	24	0.0395973	0.303969	NA	NA	NA	NA	NA	NA
mmu04390:Hippo signaling pathway	NA	NA	NA	NA	NA	NA	44	0.0420006	0.303854	NA	NA	NA	NA	NA	NA
GO:0001508~action potential	NA	NA	NA	NA	NA	NA	9	0.0423731	0.969419	NA	NA	NA	NA	NA	NA
GO:0046488~phosphatidylinositol metabolic process	NA	NA	NA	NA	NA	NA	11	0.0432508	0.970269	NA	NA	NA	NA	NA	NA
GO:0008045~motor neuron axon guidance	NA	NA	NA	NA	NA	NA	10	0.0432541	0.968925	NA	NA	NA	NA	NA	NA
GO:0043280~positive regulation of cysteine-type endopeptidase activity involved in apoptotic process	NA	NA	NA	NA	NA	NA	17	0.0449219	0.971652	NA	NA	NA	NA	NA	NA
mmu04912:GnRH signaling pathway	NA	NA	NA	NA	NA	NA	27	0.0450487	0.307522	NA	NA	NA	32	0.00729577	0.0875492
GO:0005528~FK506 binding	NA	NA	NA	NA	NA	NA	9	0.045433	0.889783	NA	NA	NA	NA	NA	NA
GO:0048471~perinuclear region of cytoplasm	NA	NA	NA	NA	NA	NA	180	0.0479985	0.566275	NA	NA	NA	NA	NA	NA
GO:0006914~autophagy	NA	NA	NA	NA	NA	NA	44	0.0493372	0.979225	NA	NA	NA	NA	NA	NA
GO:0042752~regulation of circadian rhythm	NA	NA	NA	NA	NA	NA	19	0.0494254	0.978373	NA	NA	NA	26	0.00053154	0.213546
GO:0005911~cell-cell junction	NA	NA	NA	NA	NA	NA	56	0.0495306	0.571654	NA	NA	NA	62	0.0434422	0.753772
GO:0005546~phosphatidylinositol-4,5-bisphosphate binding	NA	NA	NA	NA	NA	NA	21	0.0497213	0.905825	NA	NA	NA	NA	NA	NA
GO:0032088~negative regulation of NF-kappaB transcription factor activity	NA	NA	NA	NA	NA	NA	22	0.0497563	0.977932	NA	NA	NA	NA	NA	NA
GO:0005615~extracellular space	NA	NA	NA	NA	NA	NA	NA	NA	NA	67	6.22255e-05	0.00722329	NA	NA	NA
GO:0007420~brain development	NA	NA	NA	NA	NA	NA	NA	NA	NA	25	6.68189e-05	0.167863	66	0.0469187	1
GO:0071372~cellular response to follicle-stimulating hormone stimulus	NA	NA	NA	NA	NA	NA	NA	NA	NA	6	0.000221435	0.14123	NA	NA	NA
GO:0007212~dopamine receptor signaling pathway	NA	NA	NA	NA	NA	NA	NA	NA	NA	6	0.000512917	0.24586	10	0.00497797	1
GO:0050774~negative regulation of dendrite morphogenesis	NA	NA	NA	NA	NA	NA	NA	NA	NA	5	0.0011958	0.337213	NA	NA	NA
GO:0043524~negative regulation of neuron apoptotic process	NA	NA	NA	NA	NA	NA	NA	NA	NA	17	0.00221537	0.398454	NA	NA	NA
GO:0031012~extracellular matrix	NA	NA	NA	NA	NA	NA	NA	NA	NA	24	0.00285723	0.105164	NA	NA	NA
GO:0030336~negative regulation of cell migration	NA	NA	NA	NA	NA	NA	NA	NA	NA	13	0.00316356	0.488432	NA	NA	NA
GO:0051592~response to calcium ion	NA	NA	NA	NA	NA	NA	NA	NA	NA	10	0.00326938	0.47442	NA	NA	NA
GO:0001659~temperature homeostasis	NA	NA	NA	NA	NA	NA	NA	NA	NA	5	0.00482268	0.587821	NA	NA	NA
GO:0008201~heparin binding	NA	NA	NA	NA	NA	NA	NA	NA	NA	14	0.00518513	0.768354	NA	NA	NA
GO:0009615~response to virus	NA	NA	NA	NA	NA	NA	NA	NA	NA	10	0.00569045	0.625004	NA	NA	NA
GO:0005578~proteinaceous extracellular matrix	NA	NA	NA	NA	NA	NA	NA	NA	NA	23	0.00619683	0.199744	NA	NA	NA
GO:0035458~cellular response to interferon-beta	NA	NA	NA	NA	NA	NA	NA	NA	NA	7	0.00651572	0.652664	NA	NA	NA
mmu04974:Protein digestion and absorption	NA	NA	NA	NA	NA	NA	NA	NA	NA	10	0.00808722	0.474915	NA	NA	NA
GO:0007275~multicellular organism development	NA	NA	NA	NA	NA	NA	NA	NA	NA	55	0.00840944	0.724786	NA	NA	NA
mmu00590:Arachidonic acid metabolism	NA	NA	NA	NA	NA	NA	NA	NA	NA	8	0.0093301	0.427502	NA	NA	NA
GO:0071243~cellular response to arsenic-containing substance	NA	NA	NA	NA	NA	NA	NA	NA	NA	4	0.0093632	0.743746	NA	NA	NA
GO:0035815~positive regulation of renal sodium excretion	NA	NA	NA	NA	NA	NA	NA	NA	NA	4	0.0093632	0.743746	NA	NA	NA
GO:0070528~protein kinase C signaling	NA	NA	NA	NA	NA	NA	NA	NA	NA	4	0.0128635	0.801779	NA	NA	NA
GO:0032455~nerve growth factor processing	NA	NA	NA	NA	NA	NA	NA	NA	NA	4	0.0128635	0.801779	NA	NA	NA
GO:0016486~peptide hormone processing	NA	NA	NA	NA	NA	NA	NA	NA	NA	4	0.0128635	0.801779	NA	NA	NA
GO:0019852~L-ascorbic acid metabolic process	NA	NA	NA	NA	NA	NA	NA	NA	NA	3	0.0151881	0.839571	NA	NA	NA
GO:0005042~netrin receptor activity	NA	NA	NA	NA	NA	NA	NA	NA	NA	3	0.0155415	0.889566	NA	NA	NA
GO:0016491~oxidoreductase activity	NA	NA	NA	NA	NA	NA	NA	NA	NA	37	0.0157108	0.851817	NA	NA	NA
GO:0030154~cell differentiation	NA	NA	NA	NA	NA	NA	NA	NA	NA	44	0.0157231	0.837311	NA	NA	NA
GO:0016758~transferase activity, transferring hexosyl groups	NA	NA	NA	NA	NA	NA	NA	NA	NA	5	0.0158018	0.8137	NA	NA	NA
GO:0016338~calcium-independent cell-cell adhesion via plasma membrane cell-adhesion molecules	NA	NA	NA	NA	NA	NA	NA	NA	NA	4	0.0170116	0.825803	NA	NA	NA
GO:0035094~response to nicotine	NA	NA	NA	NA	NA	NA	NA	NA	NA	6	0.0183145	0.83723	15	0.0223118	1
GO:0015293~symporter activity	NA	NA	NA	NA	NA	NA	NA	NA	NA	10	0.0196887	0.813309	NA	NA	NA
mmu04022:cGMP-PKG signaling pathway	NA	NA	NA	NA	NA	NA	NA	NA	NA	15	0.0199927	0.381617	NA	NA	NA
GO:0031224~intrinsic component of membrane	NA	NA	NA	NA	NA	NA	NA	NA	NA	4	0.021478	0.38233	NA	NA	NA
GO:0042744~hydrogen peroxide catabolic process	NA	NA	NA	NA	NA	NA	NA	NA	NA	4	0.021818	0.876542	NA	NA	NA
GO:0035810~positive regulation of urine volume	NA	NA	NA	NA	NA	NA	NA	NA	NA	4	0.021818	0.876542	NA	NA	NA
mmu04972:Pancreatic secretion	NA	NA	NA	NA	NA	NA	NA	NA	NA	9	0.0218361	0.354598	27	0.00845902	0.0974479
GO:0043154~negative regulation of cysteine-type endopeptidase activity involved in apoptotic process	NA	NA	NA	NA	NA	NA	NA	NA	NA	8	0.0234265	0.877896	NA	NA	NA
GO:0043066~negative regulation of apoptotic process	NA	NA	NA	NA	NA	NA	NA	NA	NA	31	0.0240837	0.876933	NA	NA	NA
GO:0033564~anterior/posterior axon guidance	NA	NA	NA	NA	NA	NA	NA	NA	NA	3	0.0244438	0.872838	NA	NA	NA
GO:0007218~neuropeptide signaling pathway	NA	NA	NA	NA	NA	NA	NA	NA	NA	7	0.0256561	0.877814	NA	NA	NA
GO:0006839~mitochondrial transport	NA	NA	NA	NA	NA	NA	NA	NA	NA	4	0.027286	0.886243	NA	NA	NA
GO:0007631~feeding behavior	NA	NA	NA	NA	NA	NA	NA	NA	NA	5	0.0294335	0.897935	NA	NA	NA
GO:0045071~negative regulation of viral genome replication	NA	NA	NA	NA	NA	NA	NA	NA	NA	5	0.0294335	0.897935	NA	NA	NA
GO:0008285~negative regulation of cell proliferation	NA	NA	NA	NA	NA	NA	NA	NA	NA	25	0.0332295	0.918872	NA	NA	NA
GO:0001963~synaptic transmission, dopaminergic	NA	NA	NA	NA	NA	NA	NA	NA	NA	4	0.0334124	0.914507	NA	NA	NA
mmu04540:Gap junction	NA	NA	NA	NA	NA	NA	NA	NA	NA	10	0.0345756	0.474918	31	0.0355521	0.353069
GO:0051721~protein phosphatase 2A binding	NA	NA	NA	NA	NA	NA	NA	NA	NA	6	0.0352655	0.902791	NA	NA	NA
GO:0006110~regulation of glycolytic process	NA	NA	NA	NA	NA	NA	NA	NA	NA	3	0.0354116	0.916148	NA	NA	NA
mmu04918:Thyroid hormone synthesis	NA	NA	NA	NA	NA	NA	NA	NA	NA	8	0.0361616	0.442557	NA	NA	NA
GO:0004112~cyclic-nucleotide phosphodiesterase activity	NA	NA	NA	NA	NA	NA	NA	NA	NA	3	0.0362051	0.891732	NA	NA	NA
GO:0060170~ciliary membrane	NA	NA	NA	NA	NA	NA	NA	NA	NA	6	0.0367664	0.516805	NA	NA	NA
GO:0097110~scaffold protein binding	NA	NA	NA	NA	NA	NA	NA	NA	NA	7	0.0393896	0.89577	NA	NA	NA
GO:0022617~extracellular matrix disassembly	NA	NA	NA	NA	NA	NA	NA	NA	NA	4	0.0401884	0.93615	NA	NA	NA
GO:0004601~peroxidase activity	NA	NA	NA	NA	NA	NA	NA	NA	NA	5	0.0402241	0.885328	NA	NA	NA
GO:0001822~kidney development	NA	NA	NA	NA	NA	NA	NA	NA	NA	11	0.0421434	0.932192	NA	NA	NA
GO:0016126~sterol biosynthetic process	NA	NA	NA	NA	NA	NA	NA	NA	NA	5	0.0439787	0.935975	NA	NA	NA
GO:0071333~cellular response to glucose stimulus	NA	NA	NA	NA	NA	NA	NA	NA	NA	7	0.0445433	0.934391	NA	NA	NA
GO:0007189~adenylate cyclase-activating G-protein coupled receptor signaling pathway	NA	NA	NA	NA	NA	NA	NA	NA	NA	6	0.0459844	0.936353	NA	NA	NA
GO:0020005~symbiont-containing vacuole membrane	NA	NA	NA	NA	NA	NA	NA	NA	NA	3	0.0473693	0.59528	NA	NA	NA
GO:0006198~cAMP catabolic process	NA	NA	NA	NA	NA	NA	NA	NA	NA	4	0.0476004	0.938833	NA	NA	NA
GO:0007210~serotonin receptor signaling pathway	NA	NA	NA	NA	NA	NA	NA	NA	NA	3	0.0478883	0.932728	NA	NA	NA
GO:1901386~negative regulation of voltage-gated calcium channel activity	NA	NA	NA	NA	NA	NA	NA	NA	NA	3	0.0478883	0.932728	NA	NA	NA
GO:0071305~cellular response to vitamin D	NA	NA	NA	NA	NA	NA	NA	NA	NA	3	0.0478883	0.932728	NA	NA	NA
GO:0016918~retinal binding	NA	NA	NA	NA	NA	NA	NA	NA	NA	3	0.0489412	0.904903	NA	NA	NA
GO:0071310~cellular response to organic substance	NA	NA	NA	NA	NA	NA	NA	NA	NA	5	0.0495763	0.935544	NA	NA	NA
GO:0045197~establishment or maintenance of epithelial cell apical/basal polarity	NA	NA	NA	NA	NA	NA	NA	NA	NA	NA	NA	NA	12	0.000122583	0.0656638
GO:0030141~secretory granule	NA	NA	NA	NA	NA	NA	NA	NA	NA	NA	NA	NA	37	0.000846791	0.0510067
GO:0001965~G-protein alpha-subunit binding	NA	NA	NA	NA	NA	NA	NA	NA	NA	NA	NA	NA	17	0.00211601	0.401081
GO:0001964~startle response	NA	NA	NA	NA	NA	NA	NA	NA	NA	NA	NA	NA	13	0.00270102	0.723424
mmu04924:Renin secretion	NA	NA	NA	NA	NA	NA	NA	NA	NA	NA	NA	NA	25	0.00451813	0.0619629
GO:0031941~filamentous actin	NA	NA	NA	NA	NA	NA	NA	NA	NA	NA	NA	NA	17	0.00683617	0.266317
GO:0016671~oxidoreductase activity, acting on a sulfur group of donors, disulfide as acceptor	NA	NA	NA	NA	NA	NA	NA	NA	NA	NA	NA	NA	8	0.00745922	0.689116
GO:0019855~calcium channel inhibitor activity	NA	NA	NA	NA	NA	NA	NA	NA	NA	NA	NA	NA	7	0.00826278	0.689116
GO:0044306~neuron projection terminus	NA	NA	NA	NA	NA	NA	NA	NA	NA	NA	NA	NA	12	0.0099852	0.329834
GO:0031253~cell projection membrane	NA	NA	NA	NA	NA	NA	NA	NA	NA	NA	NA	NA	9	0.0118108	0.355713
GO:0010765~positive regulation of sodium ion transport	NA	NA	NA	NA	NA	NA	NA	NA	NA	NA	NA	NA	13	0.0121247	1
GO:0040011~locomotion	NA	NA	NA	NA	NA	NA	NA	NA	NA	NA	NA	NA	8	0.0145395	1
GO:0000082~G1/S transition of mitotic cell cycle	NA	NA	NA	NA	NA	NA	NA	NA	NA	NA	NA	NA	25	0.0151375	1
GO:0032809~neuronal cell body membrane	NA	NA	NA	NA	NA	NA	NA	NA	NA	NA	NA	NA	14	0.0206224	0.538353
GO:1901385~regulation of voltage-gated calcium channel activity	NA	NA	NA	NA	NA	NA	NA	NA	NA	NA	NA	NA	6	0.0212227	1
GO:0030027~lamellipodium	NA	NA	NA	NA	NA	NA	NA	NA	NA	NA	NA	NA	57	0.0216004	0.538353
GO:0003720~telomerase activity	NA	NA	NA	NA	NA	NA	NA	NA	NA	NA	NA	NA	6	0.0223158	1
GO:1900454~positive regulation of long term synaptic depression	NA	NA	NA	NA	NA	NA	NA	NA	NA	NA	NA	NA	5	0.0237816	1
GO:0008203~cholesterol metabolic process	NA	NA	NA	NA	NA	NA	NA	NA	NA	NA	NA	NA	28	0.0241473	1
GO:0004985~opioid receptor activity	NA	NA	NA	NA	NA	NA	NA	NA	NA	NA	NA	NA	5	0.0248116	1
GO:0032922~circadian regulation of gene expression	NA	NA	NA	NA	NA	NA	NA	NA	NA	NA	NA	NA	25	0.0294893	1
GO:0001917~photoreceptor inner segment	NA	NA	NA	NA	NA	NA	NA	NA	NA	NA	NA	NA	16	0.0323233	0.674732
GO:0007191~adenylate cyclase-activating dopamine receptor signaling pathway	NA	NA	NA	NA	NA	NA	NA	NA	NA	NA	NA	NA	7	0.0340618	1
GO:2001223~negative regulation of neuron migration	NA	NA	NA	NA	NA	NA	NA	NA	NA	NA	NA	NA	7	0.0340618	1
GO:0044224~juxtaparanode region of axon	NA	NA	NA	NA	NA	NA	NA	NA	NA	NA	NA	NA	7	0.0342637	0.674732
GO:0005548~phospholipid transporter activity	NA	NA	NA	NA	NA	NA	NA	NA	NA	NA	NA	NA	7	0.0359679	1
GO:0008144~drug binding	NA	NA	NA	NA	NA	NA	NA	NA	NA	NA	NA	NA	32	0.0391644	1
GO:0006605~protein targeting	NA	NA	NA	NA	NA	NA	NA	NA	NA	NA	NA	NA	16	0.041852	1
GO:0016849~phosphorus-oxygen lyase activity	NA	NA	NA	NA	NA	NA	NA	NA	NA	NA	NA	NA	10	0.0420728	1
GO:0045296~cadherin binding	NA	NA	NA	NA	NA	NA	NA	NA	NA	NA	NA	NA	14	0.0423178	1
GO:0010745~negative regulation of macrophage derived foam cell differentiation	NA	NA	NA	NA	NA	NA	NA	NA	NA	NA	NA	NA	6	0.0436422	1
GO:0055091~phospholipid homeostasis	NA	NA	NA	NA	NA	NA	NA	NA	NA	NA	NA	NA	6	0.0436422	1
GO:0048170~positive regulation of long-term neuronal synaptic plasticity	NA	NA	NA	NA	NA	NA	NA	NA	NA	NA	NA	NA	6	0.0436422	1
GO:0035584~calcium-mediated signaling using intracellular calcium source	NA	NA	NA	NA	NA	NA	NA	NA	NA	NA	NA	NA	8	0.0438538	1
GO:0072687~meiotic spindle	NA	NA	NA	NA	NA	NA	NA	NA	NA	NA	NA	NA	6	0.043864	0.753772
GO:0005794~Golgi apparatus	NA	NA	NA	NA	NA	NA	NA	NA	NA	NA	NA	NA	331	0.0441663	0.753772
GO:0004745~retinol dehydrogenase activity	NA	NA	NA	NA	NA	NA	NA	NA	NA	NA	NA	NA	6	0.0457376	1
GO:0000146~microfilament motor activity	NA	NA	NA	NA	NA	NA	NA	NA	NA	NA	NA	NA	8	0.0464941	1
GO:0003954~NADH dehydrogenase activity	NA	NA	NA	NA	NA	NA	NA	NA	NA	NA	NA	NA	8	0.0464941	1
mmu01230:Biosynthesis of amino acids	NA	NA	NA	NA	NA	NA	NA	NA	NA	NA	NA	NA	25	0.0469916	0.400752
mmu04730:Long-term depression	NA	NA	NA	NA	NA	NA	NA	NA	NA	NA	NA	NA	22	0.0489708	0.400752

## Sheet: Pathways_ALL_DEGs(FDR<0.05)
Differentially regulated GO and KEGG pathways based on differentially expressed genes with FDR <0.05
	HttQ111/+ vs Htt+/+ in Hdac2 WT (contrast 3)			Hdac2 KO vs Hdac2 WT in HttQ111/+ (contrast 2)			Hdac2 KO vs Hdac2 WT in Htt+/+ (contrast 1)			HttQ111/+ vs Htt+/+ in Hdac2 KO (contrast 4)			HttQ111/+ Hdac2 KO vs Htt+/+ Hdac2 WT (contrast 5)
	Count	P value	FDR	Count	P value	FDR	Count	P value	FDR	Count	P value	FDR	Count	P value	FDR
GO:0030054~cell junction	6	0.0265058	0.92811	152	5.60677e-16	1.92291e-13	159	6.65546e-14	2.49716e-11	NA	NA	NA	186	7.98722e-14	1.67532e-11
GO:0043229~intracellular organelle	2	0.0290963	0.764695	NA	NA	NA	NA	NA	NA	NA	NA	NA	NA	NA	NA
GO:0005886~plasma membrane	14	0.0323854	0.65885	521	4.09349e-23	2.83679e-20	562	1.64826e-20	1.23784e-17	NA	NA	NA	690	3.93485e-24	3.30134e-21
GO:0016021~integral component of membrane	17	0.0342156	0.573848	581	2.79389e-08	3.22693e-06	625	7.55622e-06	0.000405257	NA	NA	NA	764	7.41421e-06	0.000388783
GO:0045202~synapse	5	0.0355421	0.508014	120	3.93167e-15	8.97615e-13	123	1.23621e-12	3.0947e-10	NA	NA	NA	151	2.39676e-15	1.00544e-12
GO:0043025~neuronal cell body	5	0.0394692	0.481975	100	2.57873e-07	2.2338e-05	105	3.40657e-06	0.000213172	NA	NA	NA	131	6.26513e-08	6.57055e-06
GO:0045211~postsynaptic membrane	NA	NA	NA	63	6.28385e-12	1.08868e-09	59	4.23537e-08	6.3615e-06	NA	NA	NA	81	6.18395e-14	1.67532e-11
GO:0014069~postsynaptic density	NA	NA	NA	62	1.3555e-08	1.87872e-06	62	8.90212e-07	7.42805e-05	NA	NA	NA	86	4.59556e-12	7.71135e-10
GO:0006811~ion transport	NA	NA	NA	98	4.62776e-08	0.000206331	110	5.71224e-09	2.64416e-05	NA	NA	NA	127	2.12933e-08	0.000110065
GO:0005509~calcium ion binding	NA	NA	NA	108	4.66666e-08	6.27646e-05	116	1.65439e-07	0.00012035	NA	NA	NA	138	9.37745e-08	7.61918e-05
GO:0030425~dendrite	NA	NA	NA	92	2.56942e-07	2.5437e-05	98	1.65881e-06	0.000124569	NA	NA	NA	131	4.64903e-11	6.50089e-09
GO:0005216~ion channel activity	NA	NA	NA	40	4.03532e-07	0.000271339	49	1.73707e-09	2.52743e-06	NA	NA	NA	55	1.05135e-09	1.70844e-06
GO:0008076~voltage-gated potassium channel complex	NA	NA	NA	25	1.74716e-06	0.000134523	31	4.84015e-09	9.08738e-07	NA	NA	NA	29	6.34494e-06	0.000354893
GO:0016020~membrane	NA	NA	NA	797	1.88574e-06	0.000130674	896	3.75282e-07	4.02616e-05	NA	NA	NA	1100	2.45367e-07	1.71553e-05
mmu04080:Neuroactive ligand-receptor interaction	NA	NA	NA	45	2.98447e-06	0.000805484	45	8.15271e-05	0.00203619	NA	NA	NA	61	1.12264e-07	3.12095e-05
GO:0006813~potassium ion transport	NA	NA	NA	32	3.56362e-06	0.00791363	35	1.71902e-06	0.00198737	NA	NA	NA	35	0.00019024	0.0655567
GO:0005249~voltage-gated potassium channel activity	NA	NA	NA	22	4.85415e-06	0.00217392	25	8.61238e-07	0.000313226	NA	NA	NA	24	9.06564e-05	0.0245528
GO:0007268~chemical synaptic transmission	NA	NA	NA	36	7.855e-06	0.0116073	37	5.62032e-05	0.0284941	NA	NA	NA	44	1.79752e-05	0.0116142
GO:0019233~sensory perception of pain	NA	NA	NA	22	9.42706e-06	0.0104538	23	2.90792e-05	0.0166854	NA	NA	NA	29	3.30996e-07	0.000570306
GO:0030424~axon	NA	NA	NA	71	1.64671e-05	0.0010369	80	3.30939e-06	0.000225916	NA	NA	NA	99	1.56099e-07	1.4367e-05
GO:0071805~potassium ion transmembrane transport	NA	NA	NA	24	2.91993e-05	0.0257042	27	8.16646e-06	0.00628064	NA	NA	NA	26	0.000729376	0.179531
GO:0043005~neuron projection	NA	NA	NA	77	2.9233e-05	0.00168681	82	9.71608e-05	0.00455032	NA	NA	NA	106	7.75311e-07	5.00374e-05
GO:0034765~regulation of ion transmembrane transport	NA	NA	NA	31	3.33061e-05	0.0244486	40	4.28712e-08	9.92204e-05	NA	NA	NA	44	1.25642e-07	0.000324722
GO:0048168~regulation of neuronal synaptic plasticity	NA	NA	NA	12	3.35027e-05	0.0211154	10	0.00251121	0.397124	NA	NA	NA	11	0.00309674	0.391806
GO:0007165~signal transduction	NA	NA	NA	134	3.61621e-05	0.0199544	138	0.00128293	0.281176	NA	NA	NA	181	7.6451e-06	0.00564536
mmu04713:Circadian entrainment	NA	NA	NA	25	4.08427e-05	0.0054987	32	7.61644e-08	2.0945e-05	NA	NA	NA	33	6.61987e-06	0.000306721
GO:0019228~neuronal action potential	NA	NA	NA	13	5.70142e-05	0.0278529	16	1.54489e-06	0.00238092	NA	NA	NA	17	1.21361e-06	0.00104552
GO:0007156~homophilic cell adhesion via plasma membrane adhesion molecules	NA	NA	NA	29	7.93739e-05	0.0347752	33	1.41726e-05	0.00932841	NA	NA	NA	41	7.82348e-07	0.000808791
GO:0005244~voltage-gated ion channel activity	NA	NA	NA	30	9.53444e-05	0.0315526	38	5.98833e-07	0.000290392	NA	NA	NA	42	1.35377e-06	0.000733294
GO:0003779~actin binding	NA	NA	NA	62	0.000104194	0.0276405	64	0.00100639	0.136277	NA	NA	NA	74	0.00268256	0.256421
mmu04725:Cholinergic synapse	NA	NA	NA	27	0.000126821	0.0113497	28	0.000412479	0.00868935	NA	NA	NA	37	9.39312e-06	0.000373041
mmu04723:Retrograde endocannabinoid signaling	NA	NA	NA	25	0.000132303	0.00889128	30	4.80345e-06	0.000330184	NA	NA	NA	35	4.07774e-06	0.000244184
GO:0060291~long-term synaptic potentiation	NA	NA	NA	17	0.000133274	0.0525943	17	0.000517929	0.157426	NA	NA	NA	21	4.57396e-05	0.0214934
GO:0005200~structural constituent of cytoskeleton	NA	NA	NA	20	0.000180419	0.0396405	17	0.0135729	0.473452	NA	NA	NA	21	0.0047509	0.342145
GO:0042734~presynaptic membrane	NA	NA	NA	21	0.000229518	0.0121619	20	0.00266854	0.0771331	NA	NA	NA	23	0.00285713	0.0998806
GO:0005887~integral component of plasma membrane	NA	NA	NA	120	0.000230692	0.0113556	136	7.72265e-05	0.00385916	NA	NA	NA	157	0.00057134	0.0266308
GO:0007155~cell adhesion	NA	NA	NA	75	0.000256767	0.0910112	NA	NA	NA	NA	NA	NA	NA	NA	NA
mmu04724:Glutamatergic synapse	NA	NA	NA	26	0.000386022	0.0206334	34	8.9834e-07	8.23445e-05	NA	NA	NA	38	4.3918e-06	0.000244184
GO:0042995~cell projection	NA	NA	NA	110	0.000402642	0.0184338	131	6.96744e-06	0.000402424	NA	NA	NA	166	6.05959e-08	6.57055e-06
GO:0007626~locomotory behavior	NA	NA	NA	24	0.000406383	0.130135	27	0.000134931	0.0605528	NA	NA	NA	36	7.35789e-07	0.000808791
GO:0043197~dendritic spine	NA	NA	NA	33	0.000454957	0.0195169	45	9.89538e-08	1.23856e-05	NA	NA	NA	51	1.7124e-07	1.4367e-05
GO:0086091~regulation of heart rate by cardiac conduction	NA	NA	NA	11	0.000468227	0.138573	9	0.0213669	0.800626	NA	NA	NA	13	0.000403396	0.115842
GO:0043679~axon terminus	NA	NA	NA	21	0.000512546	0.0206823	22	0.00106337	0.0356673	NA	NA	NA	24	0.00272279	0.0993227
GO:0008021~synaptic vesicle	NA	NA	NA	29	0.000631453	0.0240253	NA	NA	NA	NA	NA	NA	NA	NA	NA
GO:0086010~membrane depolarization during action potential	NA	NA	NA	10	0.000742583	0.198145	11	0.000544524	0.154719	NA	NA	NA	12	0.000452834	0.123195
GO:0005230~extracellular ligand-gated ion channel activity	NA	NA	NA	11	0.000761223	0.136118	11	0.00203236	0.190579	NA	NA	NA	15	3.22062e-05	0.010467
mmu04020:Calcium signaling pathway	NA	NA	NA	34	0.000875019	0.0386273	41	3.39063e-05	0.00116487	NA	NA	NA	48	4.0381e-05	0.00124733
GO:0030426~growth cone	NA	NA	NA	34	0.000966011	0.0346369	35	0.00345129	0.0885592	NA	NA	NA	39	0.0118413	0.236545
GO:0045121~membrane raft	NA	NA	NA	46	0.000992587	0.0338249	53	0.000180706	0.00795189	NA	NA	NA	57	0.00313505	0.105212
GO:0005267~potassium channel activity	NA	NA	NA	19	0.00100777	0.155928	23	7.10513e-05	0.017083	NA	NA	NA	22	0.00375256	0.320943
GO:0007271~synaptic transmission, cholinergic	NA	NA	NA	9	0.00117304	0.278991	NA	NA	NA	NA	NA	NA	10	0.00243908	0.370812
GO:0043204~perikaryon	NA	NA	NA	30	0.00124693	0.0403383	34	0.000555309	0.0206416	NA	NA	NA	45	3.86157e-06	0.000231418
GO:0043195~terminal bouton	NA	NA	NA	24	0.00127267	0.0393208	NA	NA	NA	NA	NA	NA	25	0.0366887	0.459431
GO:0035556~intracellular signal transduction	NA	NA	NA	64	0.00157932	0.339377	80	7.20706e-06	0.00665011	NA	NA	NA	88	0.000229518	0.0741488
GO:0051764~actin crosslink formation	NA	NA	NA	7	0.00171191	0.345865	6	0.0176957	0.783572	NA	NA	NA	6	0.0424947	1
GO:0030276~clathrin binding	NA	NA	NA	14	0.00179465	0.23543	NA	NA	NA	NA	NA	NA	NA	NA	NA
GO:0035095~behavioral response to nicotine	NA	NA	NA	6	0.00238664	0.429234	5	0.0264622	0.851905	NA	NA	NA	NA	NA	NA
GO:0043198~dendritic shaft	NA	NA	NA	17	0.00252065	0.0732248	25	8.09333e-07	7.59733e-05	NA	NA	NA	29	2.19356e-07	1.67309e-05
mmu04261:Adrenergic signaling in cardiomyocytes	NA	NA	NA	27	0.00258225	0.0949181	34	6.80821e-05	0.00207819	NA	NA	NA	39	0.000147674	0.00342112
GO:0008092~cytoskeletal protein binding	NA	NA	NA	18	0.00269343	0.304244	18	0.00965431	0.418936	NA	NA	NA	20	0.0176636	0.722045
mmu04925:Aldosterone synthesis and secretion	NA	NA	NA	18	0.00285998	0.0921378	23	7.07018e-05	0.00194248	NA	NA	NA	25	0.000399008	0.00693277
GO:0030506~ankyrin binding	NA	NA	NA	8	0.00304425	0.311195	8	0.00621925	0.350953	NA	NA	NA	9	0.00505322	0.342145
GO:0031402~sodium ion binding	NA	NA	NA	7	0.00307227	0.291695	9	0.000111043	0.022818	NA	NA	NA	8	0.00340211	0.307135
GO:0008306~associative learning	NA	NA	NA	11	0.00316018	0.506226	11	0.00940523	0.629964	NA	NA	NA	14	0.000794319	0.186629
GO:0005923~bicellular tight junction	NA	NA	NA	22	0.00329321	0.0908528	23	0.00526096	0.113118	NA	NA	NA	27	0.00458853	0.132751
GO:0005198~structural molecule activity	NA	NA	NA	22	0.00338708	0.296035	22	0.0108408	0.432442	NA	NA	NA	27	0.00502083	0.342145
mmu04727:GABAergic synapse	NA	NA	NA	19	0.00340837	0.0973548	21	0.00223186	0.031822	NA	NA	NA	27	0.000305411	0.00618492
mmu04360:Axon guidance	NA	NA	NA	27	0.00364815	0.0939676	29	0.00416903	0.0508817	NA	NA	NA	35	0.00371706	0.0505355
mmu04971:Gastric acid secretion	NA	NA	NA	16	0.00368924	0.0867281	18	0.00208103	0.0331373	NA	NA	NA	19	0.0101117	0.104113
mmu04961:Endocrine and other factor-regulated calcium reabsorption	NA	NA	NA	12	0.00370431	0.0801104	NA	NA	NA	NA	NA	NA	NA	NA	NA
mmu04024:cAMP signaling pathway	NA	NA	NA	34	0.00376893	0.0754292	40	0.000742746	0.0135297	NA	NA	NA	49	0.000311471	0.00618492
GO:0098793~presynapse	NA	NA	NA	16	0.00392517	0.103287	17	0.00471759	0.10824	NA	NA	NA	19	0.00765221	0.183434
GO:0042391~regulation of membrane potential	NA	NA	NA	20	0.00413916	0.58551	25	0.000189731	0.0767451	NA	NA	NA	27	0.000874328	0.196496
GO:0008013~beta-catenin binding	NA	NA	NA	20	0.0042059	0.332969	21	0.00750337	0.392326	NA	NA	NA	24	0.00983657	0.499513
GO:0032092~positive regulation of protein binding	NA	NA	NA	17	0.00421771	0.575423	18	0.00553638	0.530392	NA	NA	NA	18	0.0424955	1
GO:0005912~adherens junction	NA	NA	NA	15	0.00426912	0.107771	15	0.0118452	0.200462	NA	NA	NA	17	0.0152024	0.26035
GO:0086005~ventricular cardiac muscle cell action potential	NA	NA	NA	6	0.00428781	0.565284	NA	NA	NA	NA	NA	NA	NA	NA	NA
GO:0007605~sensory perception of sound	NA	NA	NA	24	0.00432232	0.552819	28	0.00111172	0.275167	NA	NA	NA	31	0.00292174	0.391806
mmu04720:Long-term potentiation	NA	NA	NA	16	0.00436853	0.0809684	22	2.22883e-05	0.000875238	NA	NA	NA	24	0.000103301	0.00261069
GO:0035254~glutamate receptor binding	NA	NA	NA	7	0.00480894	0.350948	7	0.00897818	0.421178	NA	NA	NA	7	0.0251192	0.887363
GO:0005544~calcium-dependent phospholipid binding	NA	NA	NA	12	0.0057194	0.382556	NA	NA	NA	NA	NA	NA	NA	NA	NA
GO:0097440~apical dendrite	NA	NA	NA	8	0.00580715	0.138848	8	0.0109966	0.191786	NA	NA	NA	8	0.0343194	0.459431
mmu04970:Salivary secretion	NA	NA	NA	16	0.00603253	0.103193	18	0.00251822	0.0324791	NA	NA	NA	18	0.0343296	0.22723
GO:0008542~visual learning	NA	NA	NA	15	0.00607271	0.662582	15	0.0164186	0.777449	NA	NA	NA	23	6.07537e-05	0.0261697
mmu05033:Nicotine addiction	NA	NA	NA	11	0.00616656	0.0991197	14	0.00035268	0.00805109	NA	NA	NA	19	3.66336e-06	0.000244184
GO:0006814~sodium ion transport	NA	NA	NA	20	0.00629146	0.661216	22	0.00638165	0.571182	NA	NA	NA	23	0.0270923	1
GO:0055010~ventricular cardiac muscle tissue morphogenesis	NA	NA	NA	9	0.00646829	0.657573	NA	NA	NA	NA	NA	NA	NA	NA	NA
GO:0060079~excitatory postsynaptic potential	NA	NA	NA	11	0.00660529	0.65194	NA	NA	NA	NA	NA	NA	NA	NA	NA
GO:0060307~regulation of ventricular cardiac muscle cell membrane repolarization	NA	NA	NA	6	0.00706432	0.663802	NA	NA	NA	NA	NA	NA	6	0.0288209	1
GO:0005096~GTPase activator activity	NA	NA	NA	42	0.00712581	0.432092	44	0.018155	0.554173	NA	NA	NA	55	0.00664688	0.385756
GO:0005102~receptor binding	NA	NA	NA	56	0.00741369	0.426519	NA	NA	NA	NA	NA	NA	69	0.0467045	1
GO:0051015~actin filament binding	NA	NA	NA	26	0.00801762	0.43439	31	0.00141922	0.158191	NA	NA	NA	30	0.0485867	1
GO:0050839~cell adhesion molecule binding	NA	NA	NA	15	0.00817143	0.42408	14	0.0484665	0.771268	NA	NA	NA	17	0.0299761	0.971621
GO:0030165~PDZ domain binding	NA	NA	NA	24	0.00828193	0.412951	24	0.0358927	0.7097	NA	NA	NA	NA	NA	NA
GO:0048791~calcium ion-regulated exocytosis of neurotransmitter	NA	NA	NA	9	0.00849685	0.718694	NA	NA	NA	NA	NA	NA	NA	NA	NA
GO:0031032~actomyosin structure organization	NA	NA	NA	9	0.00849685	0.718694	9	0.0129679	0.715997	NA	NA	NA	10	0.0201202	1
GO:0017016~Ras GTPase binding	NA	NA	NA	8	0.00863649	0.41157	NA	NA	NA	NA	NA	NA	9	0.0159273	0.681103
GO:0001786~phosphatidylserine binding	NA	NA	NA	11	0.00912164	0.414837	12	0.00940614	0.423066	NA	NA	NA	13	0.0137747	0.604969
GO:0044297~cell body	NA	NA	NA	21	0.00925438	0.205556	21	0.0298294	0.354262	NA	NA	NA	24	0.0449384	0.523657
GO:0006469~negative regulation of protein kinase activity	NA	NA	NA	19	0.00929828	0.739124	18	0.047301	0.935133	NA	NA	NA	22	0.0296215	1
GO:0006816~calcium ion transport	NA	NA	NA	25	0.00945218	0.733762	32	0.000277209	0.0940051	NA	NA	NA	40	2.47329e-05	0.0142049
GO:0045956~positive regulation of calcium ion-dependent exocytosis	NA	NA	NA	7	0.0095663	0.72715	NA	NA	NA	NA	NA	NA	NA	NA	NA
GO:0005615~extracellular space	NA	NA	NA	120	0.00988203	0.211262	NA	NA	NA	NA	NA	NA	NA	NA	NA
mmu04916:Melanogenesis	NA	NA	NA	19	0.010099	0.148887	21	0.0074968	0.0826117	NA	NA	NA	24	0.0149307	0.143128
GO:0007612~learning	NA	NA	NA	16	0.0102716	0.741808	18	0.00553638	0.530392	NA	NA	NA	26	3.14981e-05	0.0162814
GO:0014704~intercalated disc	NA	NA	NA	13	0.0104559	0.215573	17	0.000396551	0.0164121	NA	NA	NA	18	0.00157113	0.0630044
GO:0017158~regulation of calcium ion-dependent exocytosis	NA	NA	NA	8	0.0107008	0.746053	8	0.0197437	0.790817	NA	NA	NA	9	0.0195932	1
GO:0006094~gluconeogenesis	NA	NA	NA	8	0.0107008	0.746053	NA	NA	NA	NA	NA	NA	NA	NA	NA
GO:0048814~regulation of dendrite morphogenesis	NA	NA	NA	8	0.0107008	0.746053	8	0.0197437	0.790817	NA	NA	NA	NA	NA	NA
GO:0070997~neuron death	NA	NA	NA	6	0.0108875	0.742292	NA	NA	NA	NA	NA	NA	NA	NA	NA
GO:0005892~acetylcholine-gated channel complex	NA	NA	NA	5	0.0109337	0.217895	NA	NA	NA	NA	NA	NA	5	0.0351582	0.459431
GO:0005215~transporter activity	NA	NA	NA	26	0.010946	0.460339	30	0.0042511	0.30554	NA	NA	NA	NA	NA	NA
GO:0030317~sperm motility	NA	NA	NA	12	0.0114349	0.749927	NA	NA	NA	NA	NA	NA	NA	NA	NA
GO:0048167~regulation of synaptic plasticity	NA	NA	NA	12	0.0114349	0.749927	NA	NA	NA	NA	NA	NA	18	0.000347326	0.105608
GO:0008066~glutamate receptor activity	NA	NA	NA	5	0.0115037	0.463391	5	0.0178883	0.559886	NA	NA	NA	5	0.0374439	1
GO:0004889~acetylcholine-activated cation-selective channel activity	NA	NA	NA	5	0.0115037	0.463391	NA	NA	NA	NA	NA	NA	5	0.0374439	1
GO:0045499~chemorepellent activity	NA	NA	NA	9	0.0119463	0.462976	9	0.0242815	0.609841	NA	NA	NA	10	0.0292765	0.970905
mmu04726:Serotonergic synapse	NA	NA	NA	20	0.0122774	0.169146	24	0.00218251	0.0328293	NA	NA	NA	28	0.00263237	0.0385158
mmu04070:Phosphatidylinositol signaling system	NA	NA	NA	20	0.0122774	0.169146	23	0.00483627	0.0563173	NA	NA	NA	29	0.00144792	0.0223624
GO:0019904~protein domain specific binding	NA	NA	NA	46	0.0130068	0.479093	NA	NA	NA	NA	NA	NA	58	0.0344184	1
GO:0030315~T-tubule	NA	NA	NA	14	0.0130566	0.247699	16	0.00570629	0.115552	NA	NA	NA	23	4.37776e-05	0.00216055
GO:0030057~desmosome	NA	NA	NA	7	0.0132869	0.244893	8	0.00546227	0.113951	NA	NA	NA	9	0.00448536	0.132751
GO:0007616~long-term memory	NA	NA	NA	10	0.0133047	0.792305	12	0.00288467	0.414271	NA	NA	NA	13	0.00533357	0.61265
GO:0046426~negative regulation of JAK-STAT cascade	NA	NA	NA	10	0.0133047	0.792305	11	0.00736756	0.584266	NA	NA	NA	11	0.0319786	1
GO:0007157~heterophilic cell-cell adhesion via plasma membrane cell adhesion molecules	NA	NA	NA	12	0.013688	0.79316	NA	NA	NA	NA	NA	NA	14	0.0267786	1
GO:0007186~G-protein coupled receptor signaling pathway	NA	NA	NA	57	0.0138778	0.789414	65	0.00719112	0.584867	NA	NA	NA	83	0.000695944	0.179531
GO:0005516~calmodulin binding	NA	NA	NA	32	0.0139409	0.490524	39	0.00125388	0.152918	NA	NA	NA	52	2.20185e-05	0.00894501
GO:0032839~dendrite cytoplasm	NA	NA	NA	8	0.0140816	0.25103	NA	NA	NA	NA	NA	NA	NA	NA	NA
GO:0048306~calcium-dependent protein binding	NA	NA	NA	15	0.015134	0.507012	16	0.0190412	0.550313	NA	NA	NA	20	0.00601995	0.362312
GO:1900454~positive regulation of long term synaptic depression	NA	NA	NA	4	0.0156899	0.820917	NA	NA	NA	NA	NA	NA	4	0.0395998	1
GO:0005861~troponin complex	NA	NA	NA	4	0.0157078	0.269103	4	0.0389574	0.430536	NA	NA	NA	NA	NA	NA
GO:0030033~microvillus assembly	NA	NA	NA	6	0.0159125	0.817856	NA	NA	NA	NA	NA	NA	NA	NA	NA
GO:0043194~axon initial segment	NA	NA	NA	6	0.0159405	0.266059	7	0.00518392	0.114831	NA	NA	NA	7	0.0153835	0.26035
GO:0030534~adult behavior	NA	NA	NA	10	0.0163317	0.818689	12	0.00379065	0.466271	NA	NA	NA	14	0.00227618	0.356533
GO:0050808~synapse organization	NA	NA	NA	10	0.0163317	0.818689	NA	NA	NA	NA	NA	NA	NA	NA	NA
GO:0006887~exocytosis	NA	NA	NA	20	0.0166918	0.81838	NA	NA	NA	NA	NA	NA	29	0.00142625	0.270107
GO:0032420~stereocilium	NA	NA	NA	9	0.0174743	0.281207	NA	NA	NA	NA	NA	NA	NA	NA	NA
GO:0030141~secretory granule	NA	NA	NA	18	0.0175177	0.275518	NA	NA	NA	NA	NA	NA	25	0.00373111	0.1204
GO:0007613~memory	NA	NA	NA	17	0.0176843	0.829325	21	0.00261936	0.397021	NA	NA	NA	23	0.00600388	0.633348
GO:0045760~positive regulation of action potential	NA	NA	NA	5	0.0177418	0.823641	5	0.0264622	0.851905	NA	NA	NA	NA	NA	NA
GO:0030431~sleep	NA	NA	NA	5	0.0177418	0.823641	NA	NA	NA	NA	NA	NA	NA	NA	NA
GO:0006937~regulation of muscle contraction	NA	NA	NA	7	0.0178437	0.8188	7	0.0391998	0.915255	NA	NA	NA	9	0.0100554	0.896143
GO:0031410~cytoplasmic vesicle	NA	NA	NA	89	0.0181142	0.277347	99	0.015368	0.246994	NA	NA	NA	116	0.039661	0.482255
GO:0042166~acetylcholine binding	NA	NA	NA	5	0.0186657	0.570338	NA	NA	NA	NA	NA	NA	NA	NA	NA
GO:0042923~neuropeptide binding	NA	NA	NA	7	0.0190938	0.566748	NA	NA	NA	NA	NA	NA	8	0.0200572	0.757976
mmu04728:Dopaminergic synapse	NA	NA	NA	23	0.019133	0.240067	37	6.65002e-07	9.14337e-05	NA	NA	NA	38	8.69213e-05	0.00241641
GO:0015629~actin cytoskeleton	NA	NA	NA	34	0.0196323	0.290725	41	0.00301764	0.0835935	NA	NA	NA	NA	NA	NA
GO:0044325~ion channel binding	NA	NA	NA	23	0.0196386	0.565538	28	0.00473445	0.304706	NA	NA	NA	35	0.000585262	0.118881
GO:0071526~semaphorin-plexin signaling pathway	NA	NA	NA	10	0.0198332	0.844473	12	0.00491002	0.520486	NA	NA	NA	14	0.00310776	0.391806
GO:0072659~protein localization to plasma membrane	NA	NA	NA	14	0.0202407	0.844452	NA	NA	NA	NA	NA	NA	18	0.0141996	1
GO:0005905~clathrin-coated pit	NA	NA	NA	14	0.0203151	0.293132	NA	NA	NA	NA	NA	NA	NA	NA	NA
GO:0021549~cerebellum development	NA	NA	NA	11	0.0214534	0.855437	NA	NA	NA	NA	NA	NA	NA	NA	NA
GO:0034220~ion transmembrane transport	NA	NA	NA	9	0.0215225	0.850773	13	0.00026844	0.0983822	NA	NA	NA	13	0.00203696	0.334181
GO:0043523~regulation of neuron apoptotic process	NA	NA	NA	9	0.0215225	0.850773	11	0.00432289	0.499185	NA	NA	NA	NA	NA	NA
GO:0030117~membrane coat	NA	NA	NA	9	0.0215762	0.302256	NA	NA	NA	NA	NA	NA	NA	NA	NA
GO:0005578~proteinaceous extracellular matrix	NA	NA	NA	42	0.0216562	0.297319	NA	NA	NA	NA	NA	NA	NA	NA	NA
GO:1901379~regulation of potassium ion transmembrane transport	NA	NA	NA	6	0.0222724	0.855062	8	0.0014106	0.291006	NA	NA	NA	8	0.00517661	0.608134
GO:0008016~regulation of heart contraction	NA	NA	NA	8	0.0228644	0.85715	NA	NA	NA	NA	NA	NA	NA	NA	NA
GO:0032590~dendrite membrane	NA	NA	NA	8	0.0229153	0.305883	10	0.00352916	0.0874886	NA	NA	NA	12	0.00114452	0.0505395
GO:0050885~neuromuscular process controlling balance	NA	NA	NA	13	0.0230191	0.853833	NA	NA	NA	NA	NA	NA	17	0.0125592	1
GO:0030672~synaptic vesicle membrane	NA	NA	NA	14	0.0233033	0.304496	NA	NA	NA	NA	NA	NA	NA	NA	NA
GO:0043234~protein complex	NA	NA	NA	84	0.0234623	0.300701	NA	NA	NA	NA	NA	NA	NA	NA	NA
GO:0042383~sarcolemma	NA	NA	NA	22	0.0235737	0.296543	NA	NA	NA	NA	NA	NA	27	0.0422452	0.499207
mmu04972:Pancreatic secretion	NA	NA	NA	14	0.025305	0.292498	NA	NA	NA	NA	NA	NA	18	0.0254683	0.18632
GO:0048511~rhythmic process	NA	NA	NA	24	0.0257185	0.879047	26	0.0289649	0.864781	NA	NA	NA	36	0.00127457	0.270107
GO:0001527~microfibril	NA	NA	NA	5	0.0267483	0.323916	NA	NA	NA	NA	NA	NA	NA	NA	NA
GO:0005938~cell cortex	NA	NA	NA	25	0.0268398	0.319399	28	0.0185315	0.26316	NA	NA	NA	34	0.0117	0.236545
GO:0019221~cytokine-mediated signaling pathway	NA	NA	NA	18	0.0273233	0.889848	20	0.0205924	0.799168	NA	NA	NA	NA	NA	NA
GO:0015464~acetylcholine receptor activity	NA	NA	NA	5	0.028059	0.686504	NA	NA	NA	NA	NA	NA	NA	NA	NA
GO:0006874~cellular calcium ion homeostasis	NA	NA	NA	17	0.0281995	0.893296	NA	NA	NA	NA	NA	NA	NA	NA	NA
GO:0017157~regulation of exocytosis	NA	NA	NA	8	0.0284517	0.89129	NA	NA	NA	NA	NA	NA	10	0.0201202	1
GO:0048843~negative regulation of axon extension involved in axon guidance	NA	NA	NA	8	0.0284517	0.89129	9	0.0167929	0.772167	NA	NA	NA	NA	NA	NA
GO:0086073~bundle of His cell-Purkinje myocyte adhesion involved in cell communication	NA	NA	NA	4	0.0285053	0.887593	NA	NA	NA	NA	NA	NA	NA	NA	NA
GO:0045838~positive regulation of membrane potential	NA	NA	NA	4	0.0285053	0.887593	NA	NA	NA	NA	NA	NA	NA	NA	NA
GO:0060373~regulation of ventricular cardiac muscle cell membrane depolarization	NA	NA	NA	4	0.0285053	0.887593	NA	NA	NA	NA	NA	NA	NA	NA	NA
GO:0051963~regulation of synapse assembly	NA	NA	NA	4	0.0285053	0.887593	NA	NA	NA	NA	NA	NA	NA	NA	NA
GO:0006102~isocitrate metabolic process	NA	NA	NA	4	0.0285053	0.887593	4	0.0389564	0.919514	NA	NA	NA	NA	NA	NA
GO:0004871~signal transducer activity	NA	NA	NA	58	0.0289529	0.687219	NA	NA	NA	NA	NA	NA	81	0.00930673	0.487853
GO:0007399~nervous system development	NA	NA	NA	55	0.0293843	0.891007	60	0.0359512	0.908103	NA	NA	NA	NA	NA	NA
GO:0031749~D2 dopamine receptor binding	NA	NA	NA	4	0.0296563	0.685537	NA	NA	NA	NA	NA	NA	NA	NA	NA
GO:0030864~cortical actin cytoskeleton	NA	NA	NA	11	0.0297392	0.341927	14	0.00357224	0.0856897	NA	NA	NA	14	0.0221368	0.331656
GO:0019226~transmission of nerve impulse	NA	NA	NA	7	0.0300203	0.892261	7	0.0496065	0.939421	NA	NA	NA	10	0.00375831	0.451784
GO:0032230~positive regulation of synaptic transmission, GABAergic	NA	NA	NA	6	0.0300741	0.888764	6	0.0469615	0.938159	NA	NA	NA	9	0.0016447	0.283383
GO:1901214~regulation of neuron death	NA	NA	NA	6	0.0300741	0.888764	NA	NA	NA	NA	NA	NA	NA	NA	NA
GO:0033268~node of Ranvier	NA	NA	NA	6	0.0301238	0.340069	7	0.0080135	0.15067	NA	NA	NA	8	0.0051838	0.144761
GO:0031594~neuromuscular junction	NA	NA	NA	14	0.0302374	0.335812	NA	NA	NA	NA	NA	NA	NA	NA	NA
GO:0055085~transmembrane transport	NA	NA	NA	48	0.0322397	0.901672	59	0.00319499	0.434329	NA	NA	NA	72	0.00144095	0.270107
mmu01210:2-Oxocarboxylic acid metabolism	NA	NA	NA	6	0.0338256	0.357524	7	0.013883	0.128297	NA	NA	NA	7	0.0435321	0.263086
GO:0005776~autophagosome	NA	NA	NA	14	0.0342162	0.365695	19	0.00122528	0.039242	NA	NA	NA	19	0.0132996	0.253599
GO:0007218~neuropeptide signaling pathway	NA	NA	NA	11	0.0344938	0.913332	NA	NA	NA	NA	NA	NA	NA	NA	NA
GO:0048013~ephrin receptor signaling pathway	NA	NA	NA	11	0.0344938	0.913332	NA	NA	NA	NA	NA	NA	NA	NA	NA
GO:0048666~neuron development	NA	NA	NA	12	0.0347868	0.911863	NA	NA	NA	NA	NA	NA	16	0.0132779	1
GO:0005251~delayed rectifier potassium channel activity	NA	NA	NA	8	0.0374315	0.759571	11	0.00282053	0.239651	NA	NA	NA	NA	NA	NA
mmu05032:Morphine addiction	NA	NA	NA	17	0.0375813	0.37507	27	2.13727e-05	0.000979115	NA	NA	NA	34	1.15579e-06	0.000160655
GO:0051287~NAD binding	NA	NA	NA	11	0.0376685	0.752354	NA	NA	NA	NA	NA	NA	NA	NA	NA
GO:0005515~protein binding	NA	NA	NA	477	0.0376948	0.743338	NA	NA	NA	NA	NA	NA	NA	NA	NA
GO:0051966~regulation of synaptic transmission, glutamatergic	NA	NA	NA	7	0.0377481	0.925701	NA	NA	NA	NA	NA	NA	NA	NA	NA
GO:0050806~positive regulation of synaptic transmission	NA	NA	NA	7	0.0377481	0.925701	NA	NA	NA	NA	NA	NA	NA	NA	NA
GO:0030017~sarcomere	NA	NA	NA	9	0.0378574	0.390595	NA	NA	NA	NA	NA	NA	12	0.0154517	0.26035
GO:0031941~filamentous actin	NA	NA	NA	9	0.0378574	0.390595	NA	NA	NA	NA	NA	NA	NA	NA	NA
GO:0005576~extracellular region	NA	NA	NA	136	0.0379163	0.385556	NA	NA	NA	NA	NA	NA	NA	NA	NA
GO:0031629~synaptic vesicle fusion to presynaptic active zone membrane	NA	NA	NA	5	0.0379378	0.923769	NA	NA	NA	NA	NA	NA	NA	NA	NA
GO:0008037~cell recognition	NA	NA	NA	5	0.0379378	0.923769	NA	NA	NA	NA	NA	NA	NA	NA	NA
GO:0045176~apical protein localization	NA	NA	NA	5	0.0379378	0.923769	6	0.0116394	0.684336	NA	NA	NA	6	0.0288209	1
GO:0048485~sympathetic nervous system development	NA	NA	NA	5	0.0379378	0.923769	NA	NA	NA	NA	NA	NA	NA	NA	NA
mmu05031:Amphetamine addiction	NA	NA	NA	13	0.0381436	0.366526	22	9.09743e-06	0.000500236	NA	NA	NA	25	1.18698e-05	0.000412477
mmu04911:Insulin secretion	NA	NA	NA	15	0.0384096	0.356366	16	0.0467976	0.280721	NA	NA	NA	NA	NA	NA
GO:0001662~behavioral fear response	NA	NA	NA	10	0.0392821	0.927764	NA	NA	NA	NA	NA	NA	NA	NA	NA
GO:0007628~adult walking behavior	NA	NA	NA	10	0.0392821	0.927764	NA	NA	NA	NA	NA	NA	13	0.0233698	1
GO:0035640~exploration behavior	NA	NA	NA	6	0.0393959	0.925533	NA	NA	NA	NA	NA	NA	8	0.0125254	1
GO:0044849~estrous cycle	NA	NA	NA	6	0.0393959	0.925533	NA	NA	NA	NA	NA	NA	7	0.0450245	1
GO:0030955~potassium ion binding	NA	NA	NA	5	0.0397919	0.753492	NA	NA	NA	NA	NA	NA	NA	NA	NA
mmu04514:Cell adhesion molecules (CAMs)	NA	NA	NA	20	0.0401779	0.357815	NA	NA	NA	NA	NA	NA	NA	NA	NA
GO:0030215~semaphorin receptor binding	NA	NA	NA	7	0.0401993	0.748326	NA	NA	NA	NA	NA	NA	NA	NA	NA
GO:0005262~calcium channel activity	NA	NA	NA	15	0.0415994	0.751885	19	0.00582449	0.346211	NA	NA	NA	23	0.00241678	0.245455
GO:0015269~calcium-activated potassium channel activity	NA	NA	NA	6	0.0416419	0.743876	NA	NA	NA	NA	NA	NA	NA	NA	NA
GO:0032809~neuronal cell body membrane	NA	NA	NA	8	0.0423186	0.414388	NA	NA	NA	NA	NA	NA	11	0.0117663	0.236545
GO:0072178~nephric duct morphogenesis	NA	NA	NA	3	0.0423235	0.936373	NA	NA	NA	NA	NA	NA	NA	NA	NA
GO:1900078~positive regulation of cellular response to insulin stimulus	NA	NA	NA	3	0.0423235	0.936373	NA	NA	NA	NA	NA	NA	NA	NA	NA
GO:0001682~tRNA 5'-leader removal	NA	NA	NA	3	0.0423235	0.936373	NA	NA	NA	NA	NA	NA	NA	NA	NA
GO:0086067~AV node cell to bundle of His cell communication	NA	NA	NA	3	0.0423235	0.936373	NA	NA	NA	NA	NA	NA	NA	NA	NA
GO:0060084~synaptic transmission involved in micturition	NA	NA	NA	3	0.0423235	0.936373	NA	NA	NA	NA	NA	NA	NA	NA	NA
GO:0005863~striated muscle myosin thick filament	NA	NA	NA	3	0.0423551	0.409137	NA	NA	NA	NA	NA	NA	NA	NA	NA
GO:0005770~late endosome	NA	NA	NA	24	0.0423948	0.404048	NA	NA	NA	NA	NA	NA	NA	NA	NA
GO:0008273~calcium, potassium:sodium antiporter activity	NA	NA	NA	3	0.0435275	0.751427	NA	NA	NA	NA	NA	NA	NA	NA	NA
GO:0015018~galactosylgalactosylxylosylprotein 3-beta-glucuronosyltransferase activity	NA	NA	NA	3	0.0435275	0.751427	NA	NA	NA	NA	NA	NA	NA	NA	NA
mmu04015:Rap1 signaling pathway	NA	NA	NA	32	0.0439018	0.372627	36	0.0291864	0.224738	NA	NA	NA	44	0.0338879	0.22723
mmu04921:Oxytocin signaling pathway	NA	NA	NA	24	0.0443053	0.364388	33	0.000632314	0.0123475	NA	NA	NA	40	0.000398584	0.00693277
GO:0051017~actin filament bundle assembly	NA	NA	NA	9	0.0446309	0.943155	NA	NA	NA	NA	NA	NA	NA	NA	NA
GO:0008277~regulation of G-protein coupled receptor protein signaling pathway	NA	NA	NA	9	0.0446309	0.943155	NA	NA	NA	NA	NA	NA	11	0.0395037	1
GO:0097060~synaptic membrane	NA	NA	NA	9	0.0447308	0.415799	NA	NA	NA	NA	NA	NA	13	0.00709606	0.175106
GO:0030204~chondroitin sulfate metabolic process	NA	NA	NA	4	0.0453474	0.943531	NA	NA	NA	NA	NA	NA	NA	NA	NA
GO:0010269~response to selenium ion	NA	NA	NA	4	0.0453474	0.943531	NA	NA	NA	NA	NA	NA	5	0.0203272	1
GO:0095500~acetylcholine receptor signaling pathway	NA	NA	NA	4	0.0453474	0.943531	NA	NA	NA	NA	NA	NA	5	0.0203272	1
GO:0046579~positive regulation of Ras protein signal transduction	NA	NA	NA	7	0.0466354	0.945913	NA	NA	NA	NA	NA	NA	11	0.00206883	0.334181
GO:0007205~protein kinase C-activating G-protein coupled receptor signaling pathway	NA	NA	NA	7	0.0466354	0.945913	NA	NA	NA	NA	NA	NA	10	0.00800459	0.795687
GO:0003720~telomerase activity	NA	NA	NA	4	0.0471103	0.771245	NA	NA	NA	NA	NA	NA	NA	NA	NA
GO:0005856~cytoskeleton	NA	NA	NA	146	0.0473599	0.42901	170	0.010089	0.1816	NA	NA	NA	201	0.0363401	0.459431
mmu04740:Olfactory transduction	NA	NA	NA	7	0.0480679	0.378129	NA	NA	NA	NA	NA	NA	NA	NA	NA
mmu04540:Gap junction	NA	NA	NA	16	0.0487445	0.372029	19	0.0171852	0.15158	NA	NA	NA	23	0.0141167	0.140159
GO:0017075~syntaxin-1 binding	NA	NA	NA	7	0.0495858	0.781303	NA	NA	NA	NA	NA	NA	10	0.00907763	0.487853
GO:0003785~actin monomer binding	NA	NA	NA	7	0.0495858	0.781303	NA	NA	NA	NA	NA	NA	NA	NA	NA
GO:0019905~syntaxin binding	NA	NA	NA	16	0.0497433	0.775049	18	0.036941	0.711975	NA	NA	NA	23	0.0105003	0.502336
GO:0032947~protein complex scaffold	NA	NA	NA	11	0.0498124	0.768277	NA	NA	NA	NA	NA	NA	14	0.0437851	1
GO:0005272~sodium channel activity	NA	NA	NA	NA	NA	NA	13	5.82481e-05	0.0168078	NA	NA	NA	13	0.000178158	0.0413581
GO:0005248~voltage-gated sodium channel activity	NA	NA	NA	NA	NA	NA	10	0.000343731	0.0606122	NA	NA	NA	10	0.00103185	0.152432
GO:0005884~actin filament	NA	NA	NA	NA	NA	NA	21	0.000459334	0.017996	NA	NA	NA	19	0.02943	0.418505
GO:0001518~voltage-gated sodium channel complex	NA	NA	NA	NA	NA	NA	8	0.000801713	0.0282749	NA	NA	NA	8	0.00165208	0.0630044
mmu05034:Alcoholism	NA	NA	NA	NA	NA	NA	29	0.000850455	0.014517	NA	NA	NA	34	0.00102258	0.0167222
GO:0005261~cation channel activity	NA	NA	NA	NA	NA	NA	13	0.000962831	0.144212	NA	NA	NA	13	0.00463184	0.342145
GO:0030036~actin cytoskeleton organization	NA	NA	NA	NA	NA	NA	33	0.00116343	0.271655	NA	NA	NA	NA	NA	NA
GO:0007264~small GTPase mediated signal transduction	NA	NA	NA	NA	NA	NA	48	0.00143953	0.28353	NA	NA	NA	54	0.00595598	0.633348
GO:0008179~adenylate cyclase binding	NA	NA	NA	NA	NA	NA	8	0.00162156	0.166097	NA	NA	NA	9	0.00103112	0.152432
GO:0007610~behavior	NA	NA	NA	NA	NA	NA	7	0.00179046	0.326334	NA	NA	NA	NA	NA	NA
GO:0034705~potassium channel complex	NA	NA	NA	NA	NA	NA	7	0.00179097	0.0545485	NA	NA	NA	6	0.0288461	0.417274
GO:0070588~calcium ion transmembrane transport	NA	NA	NA	NA	NA	NA	21	0.00184524	0.322003	NA	NA	NA	27	0.00013714	0.050634
mmu04750:Inflammatory mediator regulation of TRP channels	NA	NA	NA	NA	NA	NA	22	0.00248405	0.03362	NA	NA	NA	25	0.00546166	0.0690155
GO:0017146~NMDA selective glutamate receptor complex	NA	NA	NA	NA	NA	NA	7	0.00316136	0.0843051	NA	NA	NA	7	0.00968884	0.213919
GO:0017124~SH3 domain binding	NA	NA	NA	NA	NA	NA	28	0.00319874	0.252747	NA	NA	NA	34	0.00146289	0.198099
GO:0035725~sodium ion transmembrane transport	NA	NA	NA	NA	NA	NA	11	0.00322945	0.42568	NA	NA	NA	11	0.00872738	0.820215
GO:0004683~calmodulin-dependent protein kinase activity	NA	NA	NA	NA	NA	NA	9	0.00428962	0.293541	NA	NA	NA	10	0.0042904	0.342145
GO:0043266~regulation of potassium ion transport	NA	NA	NA	NA	NA	NA	5	0.0044614	0.498391	NA	NA	NA	NA	NA	NA
GO:1902287~semaphorin-plexin signaling pathway involved in axon guidance	NA	NA	NA	NA	NA	NA	7	0.00518264	0.528413	NA	NA	NA	8	0.00304067	0.391806
GO:0051930~regulation of sensory perception of pain	NA	NA	NA	NA	NA	NA	13	0.00531122	0.526217	NA	NA	NA	NA	NA	NA
GO:0043278~response to morphine	NA	NA	NA	NA	NA	NA	10	0.00650145	0.567731	NA	NA	NA	11	0.00872738	0.820215
GO:0016310~phosphorylation	NA	NA	NA	NA	NA	NA	101	0.0065684	0.561533	NA	NA	NA	NA	NA	NA
GO:0001725~stress fiber	NA	NA	NA	NA	NA	NA	18	0.00770864	0.149077	NA	NA	NA	20	0.0146484	0.26035
GO:1900273~positive regulation of long-term synaptic potentiation	NA	NA	NA	NA	NA	NA	8	0.00787514	0.599467	NA	NA	NA	10	0.0015154	0.270107
GO:0048148~behavioral response to cocaine	NA	NA	NA	NA	NA	NA	8	0.00787514	0.599467	NA	NA	NA	10	0.0015154	0.270107
GO:0014059~regulation of dopamine secretion	NA	NA	NA	NA	NA	NA	7	0.00801168	0.596743	NA	NA	NA	7	0.0230092	1
GO:0050966~detection of mechanical stimulus involved in sensory perception of pain	NA	NA	NA	NA	NA	NA	7	0.00801168	0.596743	NA	NA	NA	NA	NA	NA
GO:0005070~SH3/SH2 adaptor activity	NA	NA	NA	NA	NA	NA	9	0.00837234	0.412495	NA	NA	NA	NA	NA	NA
GO:0006810~transport	NA	NA	NA	NA	NA	NA	250	0.00837612	0.604283	NA	NA	NA	297	0.0411907	1
GO:0021766~hippocampus development	NA	NA	NA	NA	NA	NA	18	0.00901102	0.622598	NA	NA	NA	22	0.00363683	0.447589
GO:0009968~negative regulation of signal transduction	NA	NA	NA	NA	NA	NA	14	0.0100966	0.647914	NA	NA	NA	15	0.024997	1
mmu04912:GnRH signaling pathway	NA	NA	NA	NA	NA	NA	19	0.0101554	0.106207	NA	NA	NA	23	0.00635174	0.0735744
GO:0031852~mu-type opioid receptor binding	NA	NA	NA	NA	NA	NA	4	0.010354	0.42929	NA	NA	NA	4	0.0191882	0.757976
GO:0051491~positive regulation of filopodium assembly	NA	NA	NA	NA	NA	NA	10	0.0110972	0.674684	NA	NA	NA	NA	NA	NA
mmu05200:Pathways in cancer	NA	NA	NA	NA	NA	NA	64	0.0111712	0.112034	NA	NA	NA	75	0.0434669	0.263086
GO:0021785~branchiomotor neuron axon guidance	NA	NA	NA	NA	NA	NA	6	0.0116394	0.684336	NA	NA	NA	7	0.00566367	0.622884
GO:0005088~Ras guanyl-nucleotide exchange factor activity	NA	NA	NA	NA	NA	NA	6	0.0128317	0.47689	NA	NA	NA	6	0.0310919	0.971621
GO:0035023~regulation of Rho protein signal transduction	NA	NA	NA	NA	NA	NA	19	0.0132263	0.715726	NA	NA	NA	25	0.0014242	0.270107
GO:0004674~protein serine/threonine kinase activity	NA	NA	NA	NA	NA	NA	70	0.0134266	0.480871	NA	NA	NA	NA	NA	NA
mmu04022:cGMP-PKG signaling pathway	NA	NA	NA	NA	NA	NA	29	0.0135076	0.12935	NA	NA	NA	34	0.0241828	0.18632
GO:0008045~motor neuron axon guidance	NA	NA	NA	NA	NA	NA	8	0.0149175	0.75129	NA	NA	NA	9	0.0142534	1
GO:0048471~perinuclear region of cytoplasm	NA	NA	NA	NA	NA	NA	109	0.0160613	0.251379	NA	NA	NA	129	0.0352955	0.459431
GO:0030027~lamellipodium	NA	NA	NA	NA	NA	NA	33	0.016168	0.247748	NA	NA	NA	41	0.00641024	0.162975
GO:0001533~cornified envelope	NA	NA	NA	NA	NA	NA	5	0.0164993	0.247205	NA	NA	NA	5	0.0351582	0.459431
GO:0032426~stereocilium tip	NA	NA	NA	NA	NA	NA	5	0.0164993	0.247205	NA	NA	NA	NA	NA	NA
GO:0051481~negative regulation of cytosolic calcium ion concentration	NA	NA	NA	NA	NA	NA	7	0.0166932	0.776548	NA	NA	NA	NA	NA	NA
GO:0097225~sperm midpiece	NA	NA	NA	NA	NA	NA	7	0.0166964	0.244969	NA	NA	NA	NA	NA	NA
GO:0043484~regulation of RNA splicing	NA	NA	NA	NA	NA	NA	9	0.0167929	0.772167	NA	NA	NA	NA	NA	NA
GO:0090314~positive regulation of protein targeting to membrane	NA	NA	NA	NA	NA	NA	9	0.0167929	0.772167	NA	NA	NA	10	0.0201202	1
GO:0060081~membrane hyperpolarization	NA	NA	NA	NA	NA	NA	6	0.0176957	0.783572	NA	NA	NA	NA	NA	NA
GO:0046325~negative regulation of glucose import	NA	NA	NA	NA	NA	NA	6	0.0176957	0.783572	NA	NA	NA	NA	NA	NA
GO:0035094~response to nicotine	NA	NA	NA	NA	NA	NA	10	0.0177703	0.778882	NA	NA	NA	13	0.00286539	0.391806
GO:0043547~positive regulation of GTPase activity	NA	NA	NA	NA	NA	NA	26	0.0178705	0.774751	NA	NA	NA	29	0.0351418	1
GO:0004972~NMDA glutamate receptor activity	NA	NA	NA	NA	NA	NA	5	0.0178883	0.559886	NA	NA	NA	5	0.0374439	1
GO:0006468~protein phosphorylation	NA	NA	NA	NA	NA	NA	91	0.0181344	0.773773	NA	NA	NA	NA	NA	NA
GO:0005085~guanyl-nucleotide exchange factor activity	NA	NA	NA	NA	NA	NA	33	0.0183773	0.547857	NA	NA	NA	38	0.0305572	0.971621
GO:0018105~peptidyl-serine phosphorylation	NA	NA	NA	NA	NA	NA	28	0.0184999	0.774698	NA	NA	NA	NA	NA	NA
GO:0016023~cytoplasmic, membrane-bounded vesicle	NA	NA	NA	NA	NA	NA	29	0.0187626	0.261143	NA	NA	NA	33	0.0365624	0.459431
mmu04924:Renin secretion	NA	NA	NA	NA	NA	NA	14	0.0202376	0.1709	NA	NA	NA	18	0.00593932	0.0717882
GO:0005911~cell-cell junction	NA	NA	NA	NA	NA	NA	36	0.0208096	0.280371	NA	NA	NA	43	0.0221328	0.331656
GO:0007015~actin filament organization	NA	NA	NA	NA	NA	NA	18	0.0210304	0.800695	NA	NA	NA	21	0.0214107	1
GO:0048365~Rac GTPase binding	NA	NA	NA	NA	NA	NA	12	0.0211573	0.578646	NA	NA	NA	13	0.0393873	1
GO:2000463~positive regulation of excitatory postsynaptic potential	NA	NA	NA	NA	NA	NA	9	0.0213669	0.800626	NA	NA	NA	10	0.0261517	1
GO:0045776~negative regulation of blood pressure	NA	NA	NA	NA	NA	NA	9	0.0213669	0.800626	NA	NA	NA	NA	NA	NA
GO:0048787~presynaptic active zone membrane	NA	NA	NA	NA	NA	NA	4	0.0217097	0.285662	NA	NA	NA	4	0.0396215	0.482255
GO:0003279~cardiac septum development	NA	NA	NA	NA	NA	NA	7	0.0228201	0.816614	NA	NA	NA	NA	NA	NA
GO:0019901~protein kinase binding	NA	NA	NA	NA	NA	NA	73	0.023106	0.601198	NA	NA	NA	95	0.00229577	0.245455
GO:0007409~axonogenesis	NA	NA	NA	NA	NA	NA	22	0.0246986	0.836156	NA	NA	NA	28	0.00674761	0.68389
GO:0032421~stereocilium bundle	NA	NA	NA	NA	NA	NA	5	0.0264641	0.331585	NA	NA	NA	NA	NA	NA
GO:0002116~semaphorin receptor complex	NA	NA	NA	NA	NA	NA	5	0.0264641	0.331585	NA	NA	NA	6	0.0106654	0.229443
GO:0000278~mitotic cell cycle	NA	NA	NA	NA	NA	NA	11	0.026547	0.848485	NA	NA	NA	NA	NA	NA
GO:0007193~adenylate cyclase-inhibiting G-protein coupled receptor signaling pathway	NA	NA	NA	NA	NA	NA	11	0.026547	0.848485	NA	NA	NA	NA	NA	NA
mmu04012:ErbB signaling pathway	NA	NA	NA	NA	NA	NA	19	0.0275107	0.219223	NA	NA	NA	23	0.0280157	0.199702
GO:0003954~NADH dehydrogenase activity	NA	NA	NA	NA	NA	NA	6	0.0279687	0.65296	NA	NA	NA	NA	NA	NA
GO:0030018~Z disc	NA	NA	NA	NA	NA	NA	23	0.0280117	0.341884	NA	NA	NA	29	0.0095614	0.213919
GO:0035612~AP-2 adaptor complex binding	NA	NA	NA	NA	NA	NA	5	0.0286126	0.652143	NA	NA	NA	NA	NA	NA
GO:0046777~protein autophosphorylation	NA	NA	NA	NA	NA	NA	34	0.0286756	0.866031	NA	NA	NA	NA	NA	NA
mmu04915:Estrogen signaling pathway	NA	NA	NA	NA	NA	NA	20	0.0307853	0.229393	NA	NA	NA	25	0.0179253	0.164324
GO:0046488~phosphatidylinositol metabolic process	NA	NA	NA	NA	NA	NA	8	0.0324471	0.890614	NA	NA	NA	11	0.00309674	0.391806
GO:0046686~response to cadmium ion	NA	NA	NA	NA	NA	NA	8	0.0324471	0.890614	NA	NA	NA	11	0.00309674	0.391806
GO:0010765~positive regulation of sodium ion transport	NA	NA	NA	NA	NA	NA	8	0.0324471	0.890614	NA	NA	NA	9	0.034245	1
mmu00562:Inositol phosphate metabolism	NA	NA	NA	NA	NA	NA	16	0.0331715	0.238793	NA	NA	NA	20	0.0183239	0.164324
GO:0005234~extracellular-glutamate-gated ion channel activity	NA	NA	NA	NA	NA	NA	7	0.0335501	0.702115	NA	NA	NA	NA	NA	NA
GO:0004970~ionotropic glutamate receptor activity	NA	NA	NA	NA	NA	NA	7	0.0335501	0.702115	NA	NA	NA	NA	NA	NA
GO:0097110~scaffold protein binding	NA	NA	NA	NA	NA	NA	13	0.0338636	0.696828	NA	NA	NA	NA	NA	NA
mmu05213:Endometrial cancer	NA	NA	NA	NA	NA	NA	13	0.0341218	0.23874	NA	NA	NA	18	0.00381743	0.0505355
GO:0001659~temperature homeostasis	NA	NA	NA	NA	NA	NA	6	0.0352411	0.906753	NA	NA	NA	7	0.0230092	1
GO:0045197~establishment or maintenance of epithelial cell apical/basal polarity	NA	NA	NA	NA	NA	NA	6	0.0352411	0.906753	NA	NA	NA	7	0.0230092	1
mmu01230:Biosynthesis of amino acids	NA	NA	NA	NA	NA	NA	15	0.0366508	0.248159	NA	NA	NA	NA	NA	NA
mmu04062:Chemokine signaling pathway	NA	NA	NA	NA	NA	NA	27	0.0368509	0.24351	NA	NA	NA	NA	NA	NA
mmu04270:Vascular smooth muscle contraction	NA	NA	NA	NA	NA	NA	20	0.0377133	0.242858	NA	NA	NA	25	0.0231886	0.185197
GO:0051259~protein oligomerization	NA	NA	NA	NA	NA	NA	15	0.0383347	0.918982	NA	NA	NA	NA	NA	NA
GO:0033081~regulation of T cell differentiation in thymus	NA	NA	NA	NA	NA	NA	4	0.0389564	0.919514	NA	NA	NA	NA	NA	NA
GO:0021637~trigeminal nerve structural organization	NA	NA	NA	NA	NA	NA	4	0.0389564	0.919514	NA	NA	NA	NA	NA	NA
GO:0031914~negative regulation of synaptic plasticity	NA	NA	NA	NA	NA	NA	4	0.0389564	0.919514	NA	NA	NA	NA	NA	NA
GO:0050890~cognition	NA	NA	NA	NA	NA	NA	10	0.0390768	0.917376	NA	NA	NA	13	0.00924768	0.853594
GO:0033148~positive regulation of intracellular estrogen receptor signaling pathway	NA	NA	NA	NA	NA	NA	5	0.0393287	0.91317	NA	NA	NA	NA	NA	NA
GO:0071294~cellular response to zinc ion	NA	NA	NA	NA	NA	NA	5	0.0393287	0.91317	NA	NA	NA	NA	NA	NA
GO:0070852~cell body fiber	NA	NA	NA	NA	NA	NA	5	0.039331	0.42767	NA	NA	NA	6	0.0183117	0.295453
GO:0044224~juxtaparanode region of axon	NA	NA	NA	NA	NA	NA	5	0.039331	0.42767	NA	NA	NA	NA	NA	NA
GO:0004672~protein kinase activity	NA	NA	NA	NA	NA	NA	84	0.0395635	0.728885	NA	NA	NA	NA	NA	NA
GO:0050769~positive regulation of neurogenesis	NA	NA	NA	NA	NA	NA	9	0.0402093	0.915178	NA	NA	NA	NA	NA	NA
GO:0050919~negative chemotaxis	NA	NA	NA	NA	NA	NA	8	0.0404679	0.913841	NA	NA	NA	NA	NA	NA
GO:0045732~positive regulation of protein catabolic process	NA	NA	NA	NA	NA	NA	14	0.0413282	0.915676	NA	NA	NA	NA	NA	NA
GO:0005229~intracellular calcium activated chloride channel activity	NA	NA	NA	NA	NA	NA	5	0.0424081	0.746061	NA	NA	NA	NA	NA	NA
GO:0015278~calcium-release channel activity	NA	NA	NA	NA	NA	NA	5	0.0424081	0.746061	NA	NA	NA	NA	NA	NA
GO:0005548~phospholipid transporter activity	NA	NA	NA	NA	NA	NA	5	0.0424081	0.746061	NA	NA	NA	NA	NA	NA
GO:0005089~Rho guanyl-nucleotide exchange factor activity	NA	NA	NA	NA	NA	NA	17	0.0444135	0.754975	NA	NA	NA	25	0.000983459	0.152432
GO:0001965~G-protein alpha-subunit binding	NA	NA	NA	NA	NA	NA	9	0.0452905	0.754615	NA	NA	NA	13	0.00240666	0.245455
mmu04530:Tight junction	NA	NA	NA	NA	NA	NA	15	0.0464862	0.285127	NA	NA	NA	19	0.0233162	0.185197
GO:0051493~regulation of cytoskeleton organization	NA	NA	NA	NA	NA	NA	6	0.0469615	0.938159	NA	NA	NA	NA	NA	NA
GO:0050877~neurological system process	NA	NA	NA	NA	NA	NA	6	0.0469615	0.938159	NA	NA	NA	8	0.00826703	0.806269
GO:2000249~regulation of actin cytoskeleton reorganization	NA	NA	NA	NA	NA	NA	6	0.0469615	0.938159	NA	NA	NA	NA	NA	NA
GO:1902711~GABA-A receptor complex	NA	NA	NA	NA	NA	NA	6	0.0469657	0.481515	NA	NA	NA	9	0.00164752	0.0630044
GO:0006821~chloride transport	NA	NA	NA	NA	NA	NA	14	0.0469664	0.936016	NA	NA	NA	19	0.0062541	0.646549
GO:0070527~platelet aggregation	NA	NA	NA	NA	NA	NA	9	0.048369	0.937025	NA	NA	NA	NA	NA	NA
GO:0001975~response to amphetamine	NA	NA	NA	NA	NA	NA	9	0.048369	0.937025	NA	NA	NA	11	0.0255194	1
GO:0048786~presynaptic active zone	NA	NA	NA	NA	NA	NA	9	0.0483791	0.485736	NA	NA	NA	12	0.0091314	0.212812
GO:0016323~basolateral plasma membrane	NA	NA	NA	NA	NA	NA	32	0.0490051	0.484192	NA	NA	NA	41	0.0150008	0.26035
GO:0042755~eating behavior	NA	NA	NA	NA	NA	NA	8	0.0496748	0.937634	NA	NA	NA	9	0.0437877	1
GO:0007212~dopamine receptor signaling pathway	NA	NA	NA	NA	NA	NA	NA	NA	NA	NA	NA	NA	10	0.000121657	0.0483726
GO:0004890~GABA-A receptor activity	NA	NA	NA	NA	NA	NA	NA	NA	NA	NA	NA	NA	9	0.00186822	0.233527
GO:0034707~chloride channel complex	NA	NA	NA	NA	NA	NA	NA	NA	NA	NA	NA	NA	14	0.0041809	0.129918
GO:0005737~cytoplasm	NA	NA	NA	NA	NA	NA	NA	NA	NA	NA	NA	NA	1046	0.00536511	0.144761
GO:0030432~peristalsis	NA	NA	NA	NA	NA	NA	NA	NA	NA	NA	NA	NA	6	0.00552098	0.62039
GO:0060076~excitatory synapse	NA	NA	NA	NA	NA	NA	NA	NA	NA	NA	NA	NA	14	0.00552128	0.144761
GO:0019855~calcium channel inhibitor activity	NA	NA	NA	NA	NA	NA	NA	NA	NA	NA	NA	NA	6	0.00601112	0.362312
GO:0016307~phosphatidylinositol phosphate kinase activity	NA	NA	NA	NA	NA	NA	NA	NA	NA	NA	NA	NA	6	0.00601112	0.362312
GO:0005254~chloride channel activity	NA	NA	NA	NA	NA	NA	NA	NA	NA	NA	NA	NA	16	0.00833891	0.467266
mmu04721:Synaptic vesicle cycle	NA	NA	NA	NA	NA	NA	NA	NA	NA	NA	NA	NA	18	0.00893097	0.0954927
mmu05223:Non-small cell lung cancer	NA	NA	NA	NA	NA	NA	NA	NA	NA	NA	NA	NA	18	0.00893097	0.0954927
GO:0016079~synaptic vesicle exocytosis	NA	NA	NA	NA	NA	NA	NA	NA	NA	NA	NA	NA	9	0.0100554	0.896143
GO:0005245~voltage-gated calcium channel activity	NA	NA	NA	NA	NA	NA	NA	NA	NA	NA	NA	NA	13	0.0107432	0.502336
GO:0019871~sodium channel inhibitor activity	NA	NA	NA	NA	NA	NA	NA	NA	NA	NA	NA	NA	5	0.0108195	0.502336
GO:0032922~circadian regulation of gene expression	NA	NA	NA	NA	NA	NA	NA	NA	NA	NA	NA	NA	19	0.0111058	0.972977
GO:0032279~asymmetric synapse	NA	NA	NA	NA	NA	NA	NA	NA	NA	NA	NA	NA	8	0.0125415	0.244704
GO:0051291~protein heterooligomerization	NA	NA	NA	NA	NA	NA	NA	NA	NA	NA	NA	NA	23	0.0135167	1
GO:0051879~Hsp90 protein binding	NA	NA	NA	NA	NA	NA	NA	NA	NA	NA	NA	NA	12	0.0137333	0.604969
GO:0031226~intrinsic component of plasma membrane	NA	NA	NA	NA	NA	NA	NA	NA	NA	NA	NA	NA	11	0.0155155	0.26035
GO:0042752~regulation of circadian rhythm	NA	NA	NA	NA	NA	NA	NA	NA	NA	NA	NA	NA	16	0.0161423	1
GO:0005829~cytosol	NA	NA	NA	NA	NA	NA	NA	NA	NA	NA	NA	NA	307	0.0171537	0.282195
GO:0004930~G-protein coupled receptor activity	NA	NA	NA	NA	NA	NA	NA	NA	NA	NA	NA	NA	58	0.0177734	0.722045
GO:0030091~protein repair	NA	NA	NA	NA	NA	NA	NA	NA	NA	NA	NA	NA	4	0.0181808	1
GO:0016671~oxidoreductase activity, acting on a sulfur group of donors, disulfide as acceptor	NA	NA	NA	NA	NA	NA	NA	NA	NA	NA	NA	NA	6	0.0197963	0.757976
GO:0051209~release of sequestered calcium ion into cytosol	NA	NA	NA	NA	NA	NA	NA	NA	NA	NA	NA	NA	11	0.0200508	1
GO:0030863~cortical cytoskeleton	NA	NA	NA	NA	NA	NA	NA	NA	NA	NA	NA	NA	10	0.0201502	0.318982
GO:1901385~regulation of voltage-gated calcium channel activity	NA	NA	NA	NA	NA	NA	NA	NA	NA	NA	NA	NA	5	0.0203272	1
GO:0016081~synaptic vesicle docking	NA	NA	NA	NA	NA	NA	NA	NA	NA	NA	NA	NA	5	0.0203272	1
GO:0048841~regulation of axon extension involved in axon guidance	NA	NA	NA	NA	NA	NA	NA	NA	NA	NA	NA	NA	5	0.0203272	1
GO:0016308~1-phosphatidylinositol-4-phosphate 5-kinase activity	NA	NA	NA	NA	NA	NA	NA	NA	NA	NA	NA	NA	5	0.0217275	0.802437
GO:0009898~cytoplasmic side of plasma membrane	NA	NA	NA	NA	NA	NA	NA	NA	NA	NA	NA	NA	14	0.0221368	0.331656
mmu05414:Dilated cardiomyopathy	NA	NA	NA	NA	NA	NA	NA	NA	NA	NA	NA	NA	21	0.0225652	0.185197
GO:0008270~zinc ion binding	NA	NA	NA	NA	NA	NA	NA	NA	NA	NA	NA	NA	184	0.0228143	0.823849
GO:0007187~G-protein coupled receptor signaling pathway, coupled to cyclic nucleotide second messenger	NA	NA	NA	NA	NA	NA	NA	NA	NA	NA	NA	NA	7	0.0230092	1
mmu05231:Choline metabolism in cancer	NA	NA	NA	NA	NA	NA	NA	NA	NA	NA	NA	NA	25	0.0231886	0.185197
mmu05412:Arrhythmogenic right ventricular cardiomyopathy (ARVC)	NA	NA	NA	NA	NA	NA	NA	NA	NA	NA	NA	NA	18	0.0254683	0.18632
GO:0051968~positive regulation of synaptic transmission, glutamatergic	NA	NA	NA	NA	NA	NA	NA	NA	NA	NA	NA	NA	9	0.0262153	1
GO:0055074~calcium ion homeostasis	NA	NA	NA	NA	NA	NA	NA	NA	NA	NA	NA	NA	9	0.0262153	1
GO:0010506~regulation of autophagy	NA	NA	NA	NA	NA	NA	NA	NA	NA	NA	NA	NA	14	0.0267786	1
GO:0015459~potassium channel regulator activity	NA	NA	NA	NA	NA	NA	NA	NA	NA	NA	NA	NA	11	0.0287998	0.970905
GO:0042641~actomyosin	NA	NA	NA	NA	NA	NA	NA	NA	NA	NA	NA	NA	6	0.0288461	0.417274
GO:0030507~spectrin binding	NA	NA	NA	NA	NA	NA	NA	NA	NA	NA	NA	NA	10	0.0292765	0.970905
GO:0019722~calcium-mediated signaling	NA	NA	NA	NA	NA	NA	NA	NA	NA	NA	NA	NA	12	0.0303402	1
GO:0006979~response to oxidative stress	NA	NA	NA	NA	NA	NA	NA	NA	NA	NA	NA	NA	30	0.0321208	1
GO:0016328~lateral plasma membrane	NA	NA	NA	NA	NA	NA	NA	NA	NA	NA	NA	NA	14	0.0322127	0.450441
GO:0006939~smooth muscle contraction	NA	NA	NA	NA	NA	NA	NA	NA	NA	NA	NA	NA	7	0.0328374	1
mmu04810:Regulation of actin cytoskeleton	NA	NA	NA	NA	NA	NA	NA	NA	NA	NA	NA	NA	43	0.0341627	0.22723
GO:0051899~membrane depolarization	NA	NA	NA	NA	NA	NA	NA	NA	NA	NA	NA	NA	8	0.0342809	1
GO:0050832~defense response to fungus	NA	NA	NA	NA	NA	NA	NA	NA	NA	NA	NA	NA	5	0.0351334	1
mmu04390:Hippo signaling pathway	NA	NA	NA	NA	NA	NA	NA	NA	NA	NA	NA	NA	33	0.0355721	0.229978
GO:0007528~neuromuscular junction development	NA	NA	NA	NA	NA	NA	NA	NA	NA	NA	NA	NA	12	0.0370498	1
GO:0042220~response to cocaine	NA	NA	NA	NA	NA	NA	NA	NA	NA	NA	NA	NA	12	0.0370498	1
GO:0035255~ionotropic glutamate receptor binding	NA	NA	NA	NA	NA	NA	NA	NA	NA	NA	NA	NA	10	0.0372222	1
GO:2000650~negative regulation of sodium ion transmembrane transporter activity	NA	NA	NA	NA	NA	NA	NA	NA	NA	NA	NA	NA	4	0.0395998	1
GO:0048639~positive regulation of developmental growth	NA	NA	NA	NA	NA	NA	NA	NA	NA	NA	NA	NA	4	0.0395998	1
GO:0005882~intermediate filament	NA	NA	NA	NA	NA	NA	NA	NA	NA	NA	NA	NA	13	0.041485	0.497227
mmu04114:Oocyte meiosis	NA	NA	NA	NA	NA	NA	NA	NA	NA	NA	NA	NA	25	0.0415501	0.262521
GO:0050291~sphingosine N-acyltransferase activity	NA	NA	NA	NA	NA	NA	NA	NA	NA	NA	NA	NA	4	0.0416776	1
GO:0048169~regulation of long-term neuronal synaptic plasticity	NA	NA	NA	NA	NA	NA	NA	NA	NA	NA	NA	NA	10	0.0418173	1
GO:0007214~gamma-aminobutyric acid signaling pathway	NA	NA	NA	NA	NA	NA	NA	NA	NA	NA	NA	NA	9	0.0437877	1
GO:0007189~adenylate cyclase-activating G-protein coupled receptor signaling pathway	NA	NA	NA	NA	NA	NA	NA	NA	NA	NA	NA	NA	12	0.044731	1
GO:0060749~mammary gland alveolus development	NA	NA	NA	NA	NA	NA	NA	NA	NA	NA	NA	NA	7	0.0450245	1
GO:0050905~neuromuscular process	NA	NA	NA	NA	NA	NA	NA	NA	NA	NA	NA	NA	8	0.0450649	1
GO:0001964~startle response	NA	NA	NA	NA	NA	NA	NA	NA	NA	NA	NA	NA	8	0.0450649	1
GO:0008144~drug binding	NA	NA	NA	NA	NA	NA	NA	NA	NA	NA	NA	NA	22	0.0455304	1
GO:0009566~fertilization	NA	NA	NA	NA	NA	NA	NA	NA	NA	NA	NA	NA	11	0.0481596	1

## Sheet: Pathways_UP&DOWN_DEGs(p<0.05)
Up and down-regulated GO and KEGG pathways based on differentially expressed genes with nominal p value <0.05
	HttQ111/+ vs Htt+/+ in Hdac2 WT (contrast 3)						Hdac2 KO vs Hdac2 WT in HttQ111/+ (contrast 2)						Hdac2 KO vs Hdac2 WT in Ht+/+ (contrast 1)						HttQ111/+ vs +/+ in Hdac2 KO (contrast 4)						HttQ111/+ Hdac2 KO vs Htt+/+ Hdac2 WT (contrast 5)
	UP			DOWN			UP			DOWN			UP			DOWN			UP			DOWN			UP			DOWN
	Count	P value	FDR	Count	P value	FDR	Count	P value	FDR	Count	P value	FDR	Count	P value	FDR	Count	P value	FDR	Count	P value	FDR	Count	P value	FDR	Count	P value	FDR	Count	P value	FDR
GO:0007156~homophilic cell adhesion via plasma membrane adhesion molecules	22	1.18258e-10	2.42902e-07	NA	NA	NA	35	1.27958e-07	0.000543674	NA	NA	NA	42	5.15154e-11	2.2198e-07	NA	NA	NA	NA	NA	NA	NA	NA	NA	44	1.66351e-11	7.26619e-08	NA	NA	NA
GO:0005886~plasma membrane	150	2.00084e-06	0.000818008	169	1.26634e-06	0.000551971	441	1.29532e-06	0.000871369	446	9.77053e-12	1.21643e-09	481	2.45062e-09	1.61741e-06	438	2.03436e-08	1.9835e-06	70	0.0212757	0.638653	148	4.52277e-09	1.5287e-06	486	7.8966e-07	0.000564607	515	2.31378e-10	3.13903e-08
GO:0005509~calcium ion binding	40	5.7427e-06	0.00382306	32	0.0312357	0.799259	104	3.91883e-07	0.000529686	80	0.00812943	0.344094	108	3.55066e-07	0.000499099	NA	NA	NA	NA	NA	NA	NA	NA	NA	120	1.7568e-09	2.49993e-06	NA	NA	NA
GO:0045202~synapse	38	8.1697e-06	0.00166931	38	0.000148455	0.0318475	NA	NA	NA	119	6.22059e-17	8.29337e-14	NA	NA	NA	111	1.42963e-12	3.71705e-10	NA	NA	NA	25	0.0194149	0.339113	NA	NA	NA	128	3.57461e-14	1.77108e-11
GO:0016021~integral component of membrane	185	1.76484e-05	0.0024032	NA	NA	NA	540	0.00215046	0.303859	508	0.00118687	0.0395213	577	0.000325652	0.101908	NA	NA	NA	NA	NA	NA	161	0.000483874	0.0321884	601	0.000880411	0.314747	601	0.00238691	0.0670793
mmu05032:Morphine addiction	13	3.33722e-05	0.00695063	9	0.0309537	0.297675	NA	NA	NA	NA	NA	NA	21	0.00282425	0.544452	NA	NA	NA	NA	NA	NA	8	0.0227612	0.398805	21	0.00495096	0.693134	20	0.0314816	0.261393
GO:0007155~cell adhesion	30	0.000187807	0.175432	NA	NA	NA	65	0.022294	0.995124	NA	NA	NA	70	0.0123527	0.983754	NA	NA	NA	NA	NA	NA	NA	NA	NA	NA	NA	NA	NA	NA	NA
GO:0016020~membrane	247	0.000245029	0.0247459	268	0.00657801	0.213207	NA	NA	NA	759	3.20316e-07	2.17521e-05	NA	NA	NA	772	3.72221e-06	0.000263904	NA	NA	NA	209	0.023281	0.357466	NA	NA	NA	895	2.3402e-06	0.000158743
GO:0005887~integral component of plasma membrane	44	0.000678729	0.0540248	NA	NA	NA	NA	NA	NA	98	0.0459862	0.51212	117	0.00778216	0.521269	NA	NA	NA	NA	NA	NA	45	3.43482e-05	0.00578812	NA	NA	NA	NA	NA	NA
GO:0009986~cell surface	33	0.000748207	0.0497421	NA	NA	NA	NA	NA	NA	NA	NA	NA	NA	NA	NA	NA	NA	NA	NA	NA	NA	NA	NA	NA	NA	NA	NA	NA	NA	NA
mmu05144:Malaria	7	0.000768893	0.0772346	NA	NA	NA	NA	NA	NA	NA	NA	NA	NA	NA	NA	NA	NA	NA	NA	NA	NA	NA	NA	NA	NA	NA	NA	NA	NA	NA
GO:0030054~cell junction	40	0.00110303	0.0624487	44	0.00131698	0.108559	NA	NA	NA	130	1.30485e-10	1.39246e-08	107	0.00658028	0.516267	133	1.37562e-10	2.68246e-08	NA	NA	NA	31	0.0289605	0.407142	106	0.0369415	1	143	7.82701e-09	7.07909e-07
GO:0005216~ion channel activity	14	0.00129694	0.351316	NA	NA	NA	NA	NA	NA	33	9.83233e-05	0.0300218	32	0.00226901	0.65514	34	0.000168851	0.0542013	NA	NA	NA	NA	NA	NA	29	0.0176023	1	40	1.44374e-05	0.00522633
GO:0045211~postsynaptic membrane	18	0.0013132	0.0649744	15	0.0470733	0.599096	NA	NA	NA	64	1.18006e-13	2.20396e-11	NA	NA	NA	59	1.61988e-10	2.52701e-08	NA	NA	NA	13	0.0333593	0.436388	NA	NA	NA	69	1.40665e-12	2.29003e-10
mmu04723:Retrograde endocannabinoid signaling	11	0.00141936	0.0942139	NA	NA	NA	NA	NA	NA	23	0.000421682	0.0120643	NA	NA	NA	23	0.00174127	0.0304327	NA	NA	NA	NA	NA	NA	NA	NA	NA	27	0.000482723	0.0120242
mmu04360:Axon guidance	13	0.00167614	0.0839201	NA	NA	NA	NA	NA	NA	22	0.0449645	0.295639	28	0.00297755	0.339327	NA	NA	NA	NA	NA	NA	NA	NA	NA	31	0.000646822	0.18111	NA	NA	NA
GO:0043005~neuron projection	27	0.00213857	0.0927073	25	0.0357525	0.585989	NA	NA	NA	76	6.11113e-06	0.000380347	NA	NA	NA	77	9.76187e-06	0.000585543	NA	NA	NA	NA	NA	NA	NA	NA	NA	85	2.34406e-05	0.0013629
mmu04510:Focal adhesion	16	0.00328057	0.128338	NA	NA	NA	NA	NA	NA	NA	NA	NA	NA	NA	NA	NA	NA	NA	NA	NA	NA	NA	NA	NA	NA	NA	NA	NA	NA	NA
GO:0031225~anchored component of membrane	10	0.00404585	0.152794	NA	NA	NA	NA	NA	NA	NA	NA	NA	NA	NA	NA	NA	NA	NA	NA	NA	NA	NA	NA	NA	NA	NA	NA	NA	NA	NA
GO:0048786~presynaptic active zone	6	0.00423587	0.146007	NA	NA	NA	NA	NA	NA	NA	NA	NA	NA	NA	NA	NA	NA	NA	NA	NA	NA	NA	NA	NA	NA	NA	NA	NA	NA	NA
mmu04727:GABAergic synapse	9	0.00557335	0.176903	NA	NA	NA	NA	NA	NA	16	0.0231468	0.18873	NA	NA	NA	NA	NA	NA	NA	NA	NA	NA	NA	NA	NA	NA	NA	18	0.0496705	0.349494
GO:0006811~ion transport	28	0.00602791	0.984071	NA	NA	NA	NA	NA	NA	81	0.000105494	0.0481413	87	0.000372307	0.551696	87	1.48763e-05	0.0211407	16	0.0261899	0.984722	25	0.0197756	0.768863	NA	NA	NA	98	2.15199e-05	0.00998309
GO:0071526~semaphorin-plexin signaling pathway	6	0.00639034	0.96282	NA	NA	NA	10	0.0206894	0.996125	NA	NA	NA	12	0.00318008	0.935749	NA	NA	NA	NA	NA	NA	NA	NA	NA	11	0.0136068	1	NA	NA	NA
GO:0007268~chemical synaptic transmission	12	0.00740115	0.952721	NA	NA	NA	NA	NA	NA	34	1.38312e-05	0.0115756	26	0.0446149	0.99911	32	0.000230513	0.0684979	NA	NA	NA	12	0.00488797	0.525883	NA	NA	NA	38	2.95945e-05	0.0122712
GO:0042995~cell projection	37	0.00749765	0.226251	42	0.00492011	0.212538	101	0.012963	0.584434	107	0.000138958	0.0060878	104	0.0230707	0.753517	111	9.43103e-05	0.00489236	NA	NA	NA	NA	NA	NA	109	0.0235138	1	119	0.00147199	0.0487867
GO:0005610~laminin-5 complex	3	0.00758602	0.21304	NA	NA	NA	NA	NA	NA	NA	NA	NA	NA	NA	NA	NA	NA	NA	NA	NA	NA	NA	NA	NA	NA	NA	NA	NA	NA	NA
GO:0016604~nuclear body	7	0.0076453	0.200853	6	0.0488851	0.597686	NA	NA	NA	NA	NA	NA	NA	NA	NA	NA	NA	NA	NA	NA	NA	NA	NA	NA	NA	NA	NA	NA	NA	NA
GO:0051965~positive regulation of synapse assembly	8	0.00774439	0.930155	NA	NA	NA	NA	NA	NA	14	0.0345335	0.831729	NA	NA	NA	NA	NA	NA	NA	NA	NA	NA	NA	NA	NA	NA	NA	NA	NA	NA
GO:0001786~phosphatidylserine binding	6	0.00779919	0.824623	NA	NA	NA	NA	NA	NA	NA	NA	NA	NA	NA	NA	NA	NA	NA	NA	NA	NA	NA	NA	NA	NA	NA	NA	NA	NA	NA
GO:0007214~gamma-aminobutyric acid signaling pathway	5	0.00927407	0.935039	NA	NA	NA	NA	NA	NA	NA	NA	NA	8	0.0309964	0.997258	NA	NA	NA	NA	NA	NA	NA	NA	NA	NA	NA	NA	NA	NA	NA
GO:1902287~semaphorin-plexin signaling pathway involved in axon guidance	4	0.00958237	0.915596	NA	NA	NA	NA	NA	NA	NA	NA	NA	7	0.00390886	0.910265	NA	NA	NA	NA	NA	NA	NA	NA	NA	6	0.0243315	1	NA	NA	NA
GO:0020037~heme binding	9	0.0104532	0.826617	NA	NA	NA	NA	NA	NA	NA	NA	NA	NA	NA	NA	NA	NA	NA	6	0.0235657	0.930814	NA	NA	NA	NA	NA	NA	NA	NA	NA
GO:0010880~regulation of release of sequestered calcium ion into cytosol by sarcoplasmic reticulum	4	0.0118808	0.934631	NA	NA	NA	NA	NA	NA	NA	NA	NA	NA	NA	NA	NA	NA	NA	NA	NA	NA	NA	NA	NA	NA	NA	NA	NA	NA	NA
GO:0045197~establishment or maintenance of epithelial cell apical/basal polarity	4	0.0118808	0.934631	NA	NA	NA	NA	NA	NA	NA	NA	NA	NA	NA	NA	NA	NA	NA	NA	NA	NA	NA	NA	NA	8	0.00131239	1	NA	NA	NA
GO:0003779~actin binding	20	0.0124364	0.811643	NA	NA	NA	49	0.0452083	0.996607	52	0.00566493	0.296878	NA	NA	NA	53	0.00815756	0.470599	NA	NA	NA	NA	NA	NA	54	0.0372403	1	NA	NA	NA
GO:0005003~ephrin receptor activity	4	0.0124727	0.752232	NA	NA	NA	NA	NA	NA	NA	NA	NA	NA	NA	NA	NA	NA	NA	NA	NA	NA	NA	NA	NA	NA	NA	NA	NA	NA	NA
GO:0007605~sensory perception of sound	10	0.0125377	0.925094	10	0.0373142	0.863607	NA	NA	NA	24	0.00189584	0.256079	NA	NA	NA	23	0.00715776	0.597638	NA	NA	NA	NA	NA	NA	NA	NA	NA	23	0.0371988	1
GO:0005230~extracellular ligand-gated ion channel activity	5	0.0131174	0.715826	NA	NA	NA	NA	NA	NA	NA	NA	NA	9	0.0155667	0.957203	NA	NA	NA	NA	NA	NA	NA	NA	NA	10	0.00597488	1	NA	NA	NA
GO:0030315~T-tubule	7	0.0134083	0.307933	NA	NA	NA	NA	NA	NA	12	0.0447721	0.509753	NA	NA	NA	15	0.00385423	0.0925935	NA	NA	NA	NA	NA	NA	NA	NA	NA	17	0.00237566	0.0670793
GO:0007165~signal transduction	40	0.0142964	0.932038	47	0.0128382	0.763577	116	0.023172	0.994722	115	0.00389762	0.374768	129	0.00305433	0.962944	NA	NA	NA	NA	NA	NA	47	9.25296e-05	0.167413	126	0.0255828	1	NA	NA	NA
GO:0022617~extracellular matrix disassembly	4	0.0144683	0.917469	NA	NA	NA	NA	NA	NA	NA	NA	NA	NA	NA	NA	NA	NA	NA	NA	NA	NA	NA	NA	NA	6	0.044909	1	NA	NA	NA
GO:0055085~transmembrane transport	19	0.0151528	0.910406	NA	NA	NA	NA	NA	NA	NA	NA	NA	NA	NA	NA	51	0.00669078	0.5838	NA	NA	NA	NA	NA	NA	NA	NA	NA	57	0.0106884	0.822247
GO:0004890~GABA-A receptor activity	4	0.0151819	0.720709	NA	NA	NA	NA	NA	NA	NA	NA	NA	NA	NA	NA	NA	NA	NA	NA	NA	NA	NA	NA	NA	NA	NA	NA	NA	NA	NA
mmu04726:Serotonergic synapse	9	0.0157398	0.377295	NA	NA	NA	NA	NA	NA	NA	NA	NA	20	0.0191891	0.833951	NA	NA	NA	NA	NA	NA	NA	NA	NA	20	0.0272576	0.896373	NA	NA	NA
GO:1902711~GABA-A receptor complex	4	0.01582	0.334776	NA	NA	NA	NA	NA	NA	NA	NA	NA	NA	NA	NA	NA	NA	NA	NA	NA	NA	NA	NA	NA	NA	NA	NA	NA	NA	NA
GO:0007269~neurotransmitter secretion	5	0.0160004	0.906188	NA	NA	NA	NA	NA	NA	8	0.0373927	0.841773	NA	NA	NA	NA	NA	NA	NA	NA	NA	NA	NA	NA	NA	NA	NA	9	0.0364948	1
GO:0034765~regulation of ion transmembrane transport	10	0.0174695	0.910481	11	0.0213864	0.767851	NA	NA	NA	31	9.47579e-06	0.0099214	24	0.0258088	0.996424	30	7.25392e-05	0.0383193	NA	NA	NA	11	0.00503287	0.510117	NA	NA	NA	37	1.26858e-06	0.000840704
GO:0005244~voltage-gated ion channel activity	10	0.0183804	0.747127	11	0.0212471	0.772783	NA	NA	NA	30	3.23563e-05	0.0198614	NA	NA	NA	29	0.000247791	0.0633307	NA	NA	NA	11	0.00445973	0.753712	NA	NA	NA	36	4.93067e-06	0.00237987
GO:0007411~axon guidance	11	0.0184027	0.90786	NA	NA	NA	NA	NA	NA	NA	NA	NA	NA	NA	NA	NA	NA	NA	8	0.0116514	0.996072	NA	NA	NA	28	0.0194088	1	NA	NA	NA
GO:0042472~inner ear morphogenesis	6	0.0204816	0.917944	NA	NA	NA	NA	NA	NA	NA	NA	NA	NA	NA	NA	NA	NA	NA	NA	NA	NA	NA	NA	NA	NA	NA	NA	NA	NA	NA
GO:0048172~regulation of short-term neuronal synaptic plasticity	4	0.020526	0.906202	NA	NA	NA	NA	NA	NA	NA	NA	NA	NA	NA	NA	NA	NA	NA	NA	NA	NA	NA	NA	NA	NA	NA	NA	NA	NA	NA
GO:0007409~axonogenesis	9	0.021157	0.900909	NA	NA	NA	NA	NA	NA	NA	NA	NA	NA	NA	NA	NA	NA	NA	NA	NA	NA	NA	NA	NA	21	0.0399588	1	NA	NA	NA
GO:0019233~sensory perception of pain	7	0.0216876	0.894793	NA	NA	NA	NA	NA	NA	18	0.000523804	0.109584	NA	NA	NA	18	0.00116361	0.203909	5	0.0302885	0.981029	NA	NA	NA	NA	NA	NA	20	0.000684885	0.138138
GO:0005903~brush border	7	0.0233294	0.433302	NA	NA	NA	NA	NA	NA	NA	NA	NA	NA	NA	NA	NA	NA	NA	NA	NA	NA	NA	NA	NA	NA	NA	NA	NA	NA	NA
GO:0001105~RNA polymerase II transcription coactivator activity	5	0.0266726	0.835232	NA	NA	NA	NA	NA	NA	10	0.0100623	0.371526	NA	NA	NA	NA	NA	NA	NA	NA	NA	NA	NA	NA	NA	NA	NA	NA	NA	NA
GO:0030534~adult behavior	5	0.0278753	0.937036	NA	NA	NA	NA	NA	NA	12	0.000860159	0.151797	NA	NA	NA	14	5.96074e-05	0.0419059	NA	NA	NA	NA	NA	NA	NA	NA	NA	13	0.00127125	0.190236
mmu05211:Renal cell carcinoma	7	0.0286083	0.531533	NA	NA	NA	NA	NA	NA	NA	NA	NA	NA	NA	NA	NA	NA	NA	NA	NA	NA	NA	NA	NA	NA	NA	NA	NA	NA	NA
GO:0050798~activated T cell proliferation	3	0.0302043	0.942928	NA	NA	NA	NA	NA	NA	NA	NA	NA	NA	NA	NA	NA	NA	NA	NA	NA	NA	NA	NA	NA	NA	NA	NA	NA	NA	NA
GO:0030432~peristalsis	3	0.0302043	0.942928	NA	NA	NA	NA	NA	NA	NA	NA	NA	NA	NA	NA	NA	NA	NA	NA	NA	NA	NA	NA	NA	NA	NA	NA	NA	NA	NA
GO:0007588~excretion	3	0.0302043	0.942928	NA	NA	NA	NA	NA	NA	NA	NA	NA	NA	NA	NA	NA	NA	NA	NA	NA	NA	NA	NA	NA	NA	NA	NA	NA	NA	NA
GO:0032584~growth cone membrane	3	0.0321285	0.523847	NA	NA	NA	NA	NA	NA	NA	NA	NA	NA	NA	NA	NA	NA	NA	NA	NA	NA	NA	NA	NA	NA	NA	NA	NA	NA	NA
GO:0030285~integral component of synaptic vesicle membrane	3	0.0321285	0.523847	NA	NA	NA	NA	NA	NA	NA	NA	NA	NA	NA	NA	NA	NA	NA	NA	NA	NA	NA	NA	NA	NA	NA	NA	NA	NA	NA
mmu05033:Nicotine addiction	5	0.0339941	0.552083	NA	NA	NA	NA	NA	NA	13	0.000272031	0.010016	NA	NA	NA	13	0.000720503	0.0172783	NA	NA	NA	NA	NA	NA	NA	NA	NA	13	0.002856	0.0460321
GO:0048839~inner ear development	6	0.0357283	0.96119	NA	NA	NA	NA	NA	NA	NA	NA	NA	NA	NA	NA	NA	NA	NA	NA	NA	NA	NA	NA	NA	NA	NA	NA	NA	NA	NA
GO:0017158~regulation of calcium ion-dependent exocytosis	4	0.0361982	0.95738	NA	NA	NA	NA	NA	NA	NA	NA	NA	NA	NA	NA	NA	NA	NA	NA	NA	NA	NA	NA	NA	NA	NA	NA	NA	NA	NA
GO:0034707~chloride channel complex	5	0.0374896	0.560681	NA	NA	NA	NA	NA	NA	NA	NA	NA	NA	NA	NA	NA	NA	NA	NA	NA	NA	NA	NA	NA	NA	NA	NA	NA	NA	NA
GO:0007626~locomotory behavior	8	0.0375793	0.95702	14	9.71879e-05	0.220805	NA	NA	NA	24	0.000157191	0.0536465	NA	NA	NA	26	3.31167e-05	0.028137	NA	NA	NA	11	0.000736767	0.166746	NA	NA	NA	32	7.98178e-07	0.000840704
GO:0086002~cardiac muscle cell action potential involved in contraction	3	0.0379409	0.952909	NA	NA	NA	NA	NA	NA	6	0.00177884	0.250406	NA	NA	NA	5	0.0160417	0.780164	NA	NA	NA	NA	NA	NA	NA	NA	NA	NA	NA	NA
GO:0002116~semaphorin receptor complex	3	0.0403261	0.569047	NA	NA	NA	NA	NA	NA	NA	NA	NA	5	0.0218671	0.767588	NA	NA	NA	NA	NA	NA	NA	NA	NA	NA	NA	NA	NA	NA	NA
GO:0086010~membrane depolarization during action potential	4	0.0408482	0.958111	NA	NA	NA	NA	NA	NA	10	0.000458957	0.107437	NA	NA	NA	10	0.000878763	0.172555	NA	NA	NA	NA	NA	NA	NA	NA	NA	10	0.00199491	0.257067
GO:0048675~axon extension	4	0.0408482	0.958111	NA	NA	NA	NA	NA	NA	NA	NA	NA	NA	NA	NA	NA	NA	NA	NA	NA	NA	NA	NA	NA	NA	NA	NA	NA	NA	NA
GO:0043010~camera-type eye development	6	0.0410912	0.953949	NA	NA	NA	NA	NA	NA	12	0.0439288	0.857624	NA	NA	NA	NA	NA	NA	NA	NA	NA	NA	NA	NA	NA	NA	NA	NA	NA	NA
mmu05143:African trypanosomiasis	4	0.0411523	0.584503	NA	NA	NA	NA	NA	NA	NA	NA	NA	NA	NA	NA	NA	NA	NA	NA	NA	NA	NA	NA	NA	NA	NA	NA	NA	NA	NA
GO:0070588~calcium ion transmembrane transport	7	0.0436592	0.957651	10	0.00375973	0.553263	NA	NA	NA	15	0.0399951	0.848609	NA	NA	NA	21	0.000285136	0.0786558	NA	NA	NA	NA	NA	NA	NA	NA	NA	22	0.000926753	0.159137
GO:0035987~endodermal cell differentiation	4	0.0457835	0.95959	NA	NA	NA	NA	NA	NA	NA	NA	NA	NA	NA	NA	NA	NA	NA	NA	NA	NA	NA	NA	NA	NA	NA	NA	NA	NA	NA
GO:0005544~calcium-dependent phospholipid binding	5	0.0463512	0.943741	NA	NA	NA	NA	NA	NA	NA	NA	NA	NA	NA	NA	NA	NA	NA	NA	NA	NA	NA	NA	NA	NA	NA	NA	NA	NA	NA
mmu05200:Pathways in cancer	20	0.0464604	0.595018	24	0.0400834	0.310181	NA	NA	NA	NA	NA	NA	NA	NA	NA	NA	NA	NA	NA	NA	NA	NA	NA	NA	NA	NA	NA	NA	NA	NA
GO:0045184~establishment of protein localization	5	0.0475817	0.960448	NA	NA	NA	NA	NA	NA	NA	NA	NA	NA	NA	NA	NA	NA	NA	NA	NA	NA	NA	NA	NA	NA	NA	NA	NA	NA	NA
GO:0017134~fibroblast growth factor binding	4	0.0478659	0.934541	NA	NA	NA	NA	NA	NA	NA	NA	NA	NA	NA	NA	NA	NA	NA	NA	NA	NA	NA	NA	NA	NA	NA	NA	NA	NA	NA
GO:0005272~sodium channel activity	4	0.0478659	0.934541	NA	NA	NA	NA	NA	NA	NA	NA	NA	8	0.0381475	0.973896	9	0.00840693	0.461579	NA	NA	NA	NA	NA	NA	NA	NA	NA	9	0.0125848	0.587832
GO:0005080~protein kinase C binding	6	0.049988	0.928	NA	NA	NA	NA	NA	NA	NA	NA	NA	NA	NA	NA	NA	NA	NA	NA	NA	NA	NA	NA	NA	NA	NA	NA	NA	NA	NA
mmu04921:Oxytocin signaling pathway	NA	NA	NA	22	2.51219e-07	5.92859e-05	NA	NA	NA	27	0.00361463	0.0569329	NA	NA	NA	34	7.41471e-05	0.003937	NA	NA	NA	10	0.0368112	0.529297	NA	NA	NA	43	4.90547e-07	0.00013441
mmu04261:Adrenergic signaling in cardiomyocytes	NA	NA	NA	19	6.49694e-06	0.000766348	NA	NA	NA	25	0.00524391	0.0691627	NA	NA	NA	30	0.000590204	0.0172976	NA	NA	NA	11	0.00880694	0.323614	NA	NA	NA	33	0.000674484	0.0148248
mmu05031:Amphetamine addiction	NA	NA	NA	12	3.52688e-05	0.00277068	NA	NA	NA	15	0.00417317	0.0583982	NA	NA	NA	17	0.001504	0.0281924	NA	NA	NA	6	0.0424029	0.549753	NA	NA	NA	21	0.000117139	0.00320961
mmu04020:Calcium signaling pathway	NA	NA	NA	19	0.000163286	0.00958838	NA	NA	NA	34	0.000315707	0.0101706	NA	NA	NA	39	3.76439e-05	0.00333226	NA	NA	NA	13	0.0065149	0.382145	NA	NA	NA	47	9.98396e-07	0.00013678
GO:0035556~intracellular signal transduction	NA	NA	NA	31	0.000259967	0.28374	NA	NA	NA	53	0.0413569	0.852147	NA	NA	NA	64	0.000706767	0.148149	NA	NA	NA	25	0.000706041	0.181089	NA	NA	NA	68	0.00628874	0.583469
mmu04720:Long-term potentiation	NA	NA	NA	11	0.000285689	0.0133959	NA	NA	NA	20	2.25963e-05	0.00292198	NA	NA	NA	23	1.85244e-06	0.000246345	NA	NA	NA	NA	NA	NA	NA	NA	NA	25	1.7438e-06	0.000159267
GO:0043204~perikaryon	NA	NA	NA	16	0.00034004	0.0482259	NA	NA	NA	27	0.00445837	0.105295	NA	NA	NA	33	8.1424e-05	0.00452639	NA	NA	NA	NA	NA	NA	NA	NA	NA	39	5.41788e-06	0.000339243
mmu04024:cAMP signaling pathway	NA	NA	NA	19	0.000547967	0.0213285	30	0.0478419	0.701139	32	0.00552998	0.0692941	31	0.0416148	0.658439	NA	NA	NA	NA	NA	NA	14	0.0056299	0.464129	NA	NA	NA	37	0.0156022	0.158334
GO:0005096~GTPase activator activity	NA	NA	NA	22	0.000569086	0.350829	NA	NA	NA	41	0.00442702	0.263355	NA	NA	NA	41	0.00774884	0.473639	NA	NA	NA	NA	NA	NA	NA	NA	NA	49	0.00238544	0.246723
GO:0006469~negative regulation of protein kinase activity	NA	NA	NA	12	0.000626271	0.414943	NA	NA	NA	19	0.0047956	0.404766	NA	NA	NA	18	0.0133549	0.756595	NA	NA	NA	NA	NA	NA	NA	NA	NA	24	0.000545768	0.115083
mmu04015:Rap1 signaling pathway	NA	NA	NA	20	0.000676593	0.0225602	NA	NA	NA	32	0.0221883	0.18743	NA	NA	NA	NA	NA	NA	NA	NA	NA	14	0.0115955	0.349227	NA	NA	NA	NA	NA	NA
GO:0043197~dendritic spine	NA	NA	NA	16	0.000808157	0.0843533	NA	NA	NA	50	4.74567e-13	7.09083e-11	NA	NA	NA	51	3.64161e-13	1.4202e-10	NA	NA	NA	15	0.000219763	0.0244586	NA	NA	NA	57	4.35154e-14	1.77108e-11
mmu04010:MAPK signaling pathway	NA	NA	NA	22	0.000877191	0.0255563	NA	NA	NA	37	0.0215087	0.18826	NA	NA	NA	NA	NA	NA	NA	NA	NA	NA	NA	NA	NA	NA	NA	NA	NA	NA
GO:0061003~positive regulation of dendritic spine morphogenesis	NA	NA	NA	6	0.000984862	0.468657	NA	NA	NA	NA	NA	NA	NA	NA	NA	NA	NA	NA	NA	NA	NA	NA	NA	NA	NA	NA	NA	NA	NA	NA
GO:0001975~response to amphetamine	NA	NA	NA	7	0.00145852	0.527326	NA	NA	NA	NA	NA	NA	NA	NA	NA	NA	NA	NA	NA	NA	NA	6	0.0028756	0.404499	NA	NA	NA	12	0.00186264	0.254141
GO:0021756~striatum development	NA	NA	NA	5	0.00172804	0.522862	NA	NA	NA	NA	NA	NA	NA	NA	NA	NA	NA	NA	NA	NA	NA	NA	NA	NA	NA	NA	NA	6	0.0275104	1
mmu04728:Dopaminergic synapse	NA	NA	NA	14	0.00178265	0.0457092	NA	NA	NA	25	0.00238742	0.0432566	NA	NA	NA	29	0.000428304	0.0141432	NA	NA	NA	9	0.0436012	0.531334	NA	NA	NA	37	5.24271e-06	0.000359126
GO:0014069~postsynaptic density	NA	NA	NA	21	0.00225241	0.151139	NA	NA	NA	74	1.53056e-15	5.80536e-13	NA	NA	NA	76	6.7534e-16	5.19584e-13	NA	NA	NA	20	0.000289289	0.024152	NA	NA	NA	79	9.11396e-14	2.47292e-11
GO:0070498~interleukin-1-mediated signaling pathway	NA	NA	NA	5	0.00233825	0.576192	NA	NA	NA	NA	NA	NA	NA	NA	NA	NA	NA	NA	NA	NA	NA	NA	NA	NA	NA	NA	NA	NA	NA	NA
mmu04922:Glucagon signaling pathway	NA	NA	NA	11	0.00250287	0.0574269	NA	NA	NA	NA	NA	NA	NA	NA	NA	NA	NA	NA	NA	NA	NA	NA	NA	NA	NA	NA	NA	NA	NA	NA
GO:0007186~G-protein coupled receptor signaling pathway	NA	NA	NA	27	0.00251417	0.55414	NA	NA	NA	NA	NA	NA	NA	NA	NA	NA	NA	NA	NA	NA	NA	23	0.00233282	0.370254	NA	NA	NA	NA	NA	NA
GO:0060079~excitatory postsynaptic potential	NA	NA	NA	7	0.002859	0.558076	NA	NA	NA	NA	NA	NA	NA	NA	NA	9	0.0451865	0.922263	NA	NA	NA	7	0.000682153	0.236792	NA	NA	NA	10	0.043426	1
GO:0090314~positive regulation of protein targeting to membrane	NA	NA	NA	6	0.00364147	0.607992	NA	NA	NA	NA	NA	NA	NA	NA	NA	NA	NA	NA	NA	NA	NA	NA	NA	NA	NA	NA	NA	NA	NA	NA
GO:0060840~artery development	NA	NA	NA	4	0.00369295	0.578272	NA	NA	NA	NA	NA	NA	NA	NA	NA	NA	NA	NA	NA	NA	NA	NA	NA	NA	NA	NA	NA	NA	NA	NA
GO:0008081~phosphoric diester hydrolase activity	NA	NA	NA	8	0.00371222	0.756201	NA	NA	NA	NA	NA	NA	NA	NA	NA	NA	NA	NA	NA	NA	NA	6	0.0189126	0.819181	NA	NA	NA	NA	NA	NA
GO:0043025~neuronal cell body	NA	NA	NA	34	0.00391902	0.216965	NA	NA	NA	106	1.35194e-10	1.26238e-08	NA	NA	NA	103	7.95253e-09	1.03383e-06	NA	NA	NA	28	0.00510193	0.194352	NA	NA	NA	118	9.59939e-10	9.76738e-08
mmu05034:Alcoholism	NA	NA	NA	13	0.00416651	0.0856824	NA	NA	NA	NA	NA	NA	NA	NA	NA	NA	NA	NA	NA	NA	NA	NA	NA	NA	NA	NA	NA	33	0.000107097	0.00320961
GO:0006816~calcium ion transport	NA	NA	NA	13	0.00422213	0.56633	NA	NA	NA	26	0.0020168	0.253985	NA	NA	NA	30	0.000118932	0.0499597	NA	NA	NA	NA	NA	NA	NA	NA	NA	33	0.000167993	0.0541918
GO:0005516~calmodulin binding	NA	NA	NA	16	0.00426556	0.660912	NA	NA	NA	38	8.69524e-05	0.0353036	NA	NA	NA	39	7.24251e-05	0.0466778	NA	NA	NA	12	0.0211221	0.774011	NA	NA	NA	50	3.87212e-07	0.000560683
GO:0009968~negative regulation of signal transduction	NA	NA	NA	8	0.00450705	0.563195	NA	NA	NA	NA	NA	NA	NA	NA	NA	14	0.00290983	0.38304	NA	NA	NA	NA	NA	NA	NA	NA	NA	17	0.0004915	0.108575
GO:0005923~bicellular tight junction	NA	NA	NA	11	0.00458313	0.221476	19	0.0319055	0.766559	NA	NA	NA	20	0.0239832	0.708422	NA	NA	NA	NA	NA	NA	9	0.00932805	0.2715	NA	NA	NA	NA	NA	NA
mmu04972:Pancreatic secretion	NA	NA	NA	9	0.00495553	0.09308	NA	NA	NA	NA	NA	NA	NA	NA	NA	NA	NA	NA	NA	NA	NA	7	0.0175825	0.387397	NA	NA	NA	16	0.0264865	0.234107
GO:0005737~cytoplasm	NA	NA	NA	269	0.00503454	0.19753	NA	NA	NA	703	0.0253551	0.380977	NA	NA	NA	741	0.00202329	0.0548581	NA	NA	NA	NA	NA	NA	NA	NA	NA	865	0.000991087	0.0387397
GO:0030424~axon	NA	NA	NA	26	0.00515896	0.185362	NA	NA	NA	78	9.03822e-09	7.50172e-07	NA	NA	NA	75	3.40312e-07	2.6544e-05	NA	NA	NA	21	0.00947798	0.253695	NA	NA	NA	92	7.11507e-10	8.27381e-08
GO:0043987~histone H3-S10 phosphorylation	NA	NA	NA	3	0.00530711	0.597734	NA	NA	NA	NA	NA	NA	NA	NA	NA	NA	NA	NA	NA	NA	NA	NA	NA	NA	NA	NA	NA	NA	NA	NA
GO:0035175~histone kinase activity (H3-S10 specific)	NA	NA	NA	3	0.00539339	0.641622	NA	NA	NA	NA	NA	NA	NA	NA	NA	NA	NA	NA	NA	NA	NA	NA	NA	NA	NA	NA	NA	NA	NA	NA
mmu05412:Arrhythmogenic right ventricular cardiomyopathy (ARVC)	NA	NA	NA	9	0.00547879	0.0949224	NA	NA	NA	NA	NA	NA	NA	NA	NA	NA	NA	NA	NA	NA	NA	NA	NA	NA	14	0.0491114	1	NA	NA	NA
GO:0048169~regulation of long-term neuronal synaptic plasticity	NA	NA	NA	6	0.00606285	0.62306	NA	NA	NA	NA	NA	NA	NA	NA	NA	9	0.014786	0.767492	NA	NA	NA	NA	NA	NA	NA	NA	NA	12	0.000960517	0.159137
GO:1900273~positive regulation of long-term synaptic potentiation	NA	NA	NA	5	0.00624095	0.611451	NA	NA	NA	7	0.0132057	0.618906	NA	NA	NA	10	9.1745e-05	0.0429766	NA	NA	NA	NA	NA	NA	NA	NA	NA	10	0.000332942	0.0812905
GO:0042311~vasodilation	NA	NA	NA	5	0.00764257	0.66516	NA	NA	NA	NA	NA	NA	NA	NA	NA	NA	NA	NA	NA	NA	NA	NA	NA	NA	NA	NA	NA	7	0.0425252	1
GO:0030165~PDZ domain binding	NA	NA	NA	12	0.0077095	0.69113	NA	NA	NA	21	0.0307414	0.629447	NA	NA	NA	21	0.0490589	0.802005	NA	NA	NA	12	0.000942448	0.446334	NA	NA	NA	27	0.00725043	0.456462
mmu04910:Insulin signaling pathway	NA	NA	NA	13	0.00814993	0.128855	NA	NA	NA	NA	NA	NA	NA	NA	NA	NA	NA	NA	NA	NA	NA	NA	NA	NA	NA	NA	NA	NA	NA	NA
GO:0030425~dendrite	NA	NA	NA	30	0.00869035	0.25378	NA	NA	NA	106	1.1368e-13	2.8308e-11	NA	NA	NA	95	1.11141e-08	1.23843e-06	NA	NA	NA	25	0.00996163	0.245721	NA	NA	NA	118	7.30704e-13	1.48698e-10
GO:0046983~protein dimerization activity	NA	NA	NA	14	0.00873172	0.670248	NA	NA	NA	NA	NA	NA	NA	NA	NA	28	0.014683	0.542057	NA	NA	NA	10	0.0426629	0.858101	NA	NA	NA	35	0.00165857	0.200134
GO:0010976~positive regulation of neuron projection development	NA	NA	NA	13	0.00911014	0.709592	NA	NA	NA	NA	NA	NA	NA	NA	NA	NA	NA	NA	NA	NA	NA	NA	NA	NA	NA	NA	NA	NA	NA	NA
GO:0008306~associative learning	NA	NA	NA	6	0.00943787	0.703913	NA	NA	NA	9	0.0223759	0.74853	NA	NA	NA	11	0.0033075	0.399411	NA	NA	NA	NA	NA	NA	NA	NA	NA	13	0.000467225	0.108373
GO:0045595~regulation of cell differentiation	NA	NA	NA	6	0.00943787	0.703913	NA	NA	NA	NA	NA	NA	NA	NA	NA	NA	NA	NA	NA	NA	NA	NA	NA	NA	NA	NA	NA	NA	NA	NA
mmu05410:Hypertrophic cardiomyopathy (HCM)	NA	NA	NA	9	0.00955364	0.140181	15	0.0340743	0.79109	NA	NA	NA	15	0.0385082	0.702691	NA	NA	NA	NA	NA	NA	NA	NA	NA	17	0.0110052	0.896373	NA	NA	NA
GO:1990635~proximal dendrite	NA	NA	NA	3	0.00987479	0.265862	NA	NA	NA	NA	NA	NA	NA	NA	NA	NA	NA	NA	NA	NA	NA	NA	NA	NA	NA	NA	NA	NA	NA	NA
GO:0031161~phosphatidylinositol catabolic process	NA	NA	NA	3	0.0103142	0.718418	NA	NA	NA	NA	NA	NA	NA	NA	NA	NA	NA	NA	NA	NA	NA	NA	NA	NA	NA	NA	NA	NA	NA	NA
GO:0005501~retinoid binding	NA	NA	NA	3	0.0104794	0.680903	NA	NA	NA	NA	NA	NA	NA	NA	NA	NA	NA	NA	NA	NA	NA	NA	NA	NA	NA	NA	NA	NA	NA	NA
GO:0007616~long-term memory	NA	NA	NA	6	0.0108022	0.718402	NA	NA	NA	9	0.0268845	0.778933	NA	NA	NA	13	0.000199384	0.0639577	NA	NA	NA	NA	NA	NA	NA	NA	NA	13	0.000927464	0.159137
GO:0048754~branching morphogenesis of an epithelial tube	NA	NA	NA	6	0.0108022	0.718402	NA	NA	NA	NA	NA	NA	NA	NA	NA	NA	NA	NA	NA	NA	NA	NA	NA	NA	NA	NA	NA	NA	NA	NA
mmu04916:Melanogenesis	NA	NA	NA	10	0.0120168	0.163327	NA	NA	NA	19	0.00567421	0.0677751	NA	NA	NA	NA	NA	NA	NA	NA	NA	NA	NA	NA	NA	NA	NA	23	0.00430694	0.0655611
mmu04713:Circadian entrainment	NA	NA	NA	10	0.012922	0.165194	NA	NA	NA	24	5.00834e-05	0.00323773	NA	NA	NA	25	8.95635e-05	0.00396295	NA	NA	NA	NA	NA	NA	NA	NA	NA	28	5.33113e-05	0.00208676
GO:0050804~modulation of synaptic transmission	NA	NA	NA	5	0.0130375	0.754298	NA	NA	NA	NA	NA	NA	NA	NA	NA	7	0.0412585	0.919668	NA	NA	NA	NA	NA	NA	NA	NA	NA	8	0.0280923	1
GO:0005829~cytosol	NA	NA	NA	85	0.0132374	0.321138	NA	NA	NA	227	0.000590291	0.0218125	NA	NA	NA	230	0.00140444	0.0446488	NA	NA	NA	NA	NA	NA	NA	NA	NA	262	0.0023898	0.0670793
mmu05030:Cocaine addiction	NA	NA	NA	7	0.0133144	0.161163	NA	NA	NA	NA	NA	NA	NA	NA	NA	NA	NA	NA	NA	NA	NA	6	0.0155846	0.390979	NA	NA	NA	NA	NA	NA
GO:0019722~calcium-mediated signaling	NA	NA	NA	6	0.0139222	0.762972	NA	NA	NA	NA	NA	NA	NA	NA	NA	NA	NA	NA	NA	NA	NA	NA	NA	NA	NA	NA	NA	NA	NA	NA
GO:0098794~postsynapse	NA	NA	NA	5	0.0141571	0.321953	NA	NA	NA	NA	NA	NA	NA	NA	NA	NA	NA	NA	NA	NA	NA	4	0.0339804	0.426749	NA	NA	NA	NA	NA	NA
GO:0007611~learning or memory	NA	NA	NA	7	0.0143239	0.759355	NA	NA	NA	NA	NA	NA	NA	NA	NA	NA	NA	NA	NA	NA	NA	NA	NA	NA	NA	NA	NA	12	0.0465507	1
mmu04725:Cholinergic synapse	NA	NA	NA	11	0.0148427	0.169514	NA	NA	NA	20	0.0199844	0.182163	NA	NA	NA	NA	NA	NA	NA	NA	NA	10	0.00768432	0.347013	22	0.0240004	0.896373	26	0.00603199	0.0826383
GO:0004860~protein kinase inhibitor activity	NA	NA	NA	7	0.0148579	0.75834	NA	NA	NA	14	0.00253777	0.189461	NA	NA	NA	15	0.000957132	0.165209	NA	NA	NA	NA	NA	NA	NA	NA	NA	16	0.00153849	0.200134
GO:0009987~cellular process	NA	NA	NA	5	0.0152612	0.768259	NA	NA	NA	NA	NA	NA	NA	NA	NA	NA	NA	NA	NA	NA	NA	NA	NA	NA	NA	NA	NA	NA	NA	NA
GO:0051781~positive regulation of cell division	NA	NA	NA	6	0.0156878	0.765345	NA	NA	NA	NA	NA	NA	NA	NA	NA	NA	NA	NA	NA	NA	NA	NA	NA	NA	NA	NA	NA	NA	NA	NA
GO:0043525~positive regulation of neuron apoptotic process	NA	NA	NA	8	0.0160742	0.761743	NA	NA	NA	NA	NA	NA	NA	NA	NA	NA	NA	NA	NA	NA	NA	NA	NA	NA	NA	NA	NA	15	0.0497142	1
GO:0051653~spindle localization	NA	NA	NA	3	0.0167061	0.763442	NA	NA	NA	NA	NA	NA	NA	NA	NA	NA	NA	NA	NA	NA	NA	NA	NA	NA	NA	NA	NA	NA	NA	NA
GO:0033602~negative regulation of dopamine secretion	NA	NA	NA	3	0.0167061	0.763442	NA	NA	NA	NA	NA	NA	NA	NA	NA	4	0.0144655	0.767801	NA	NA	NA	NA	NA	NA	NA	NA	NA	NA	NA	NA
mmu05414:Dilated cardiomyopathy	NA	NA	NA	9	0.0167652	0.180865	16	0.0365676	0.763598	NA	NA	NA	17	0.0205854	0.764399	NA	NA	NA	NA	NA	NA	NA	NA	NA	18	0.0132009	0.896373	NA	NA	NA
GO:0005215~transporter activity	NA	NA	NA	12	0.016975	0.763982	29	0.00118235	0.550556	NA	NA	NA	30	0.00128543	0.595149	NA	NA	NA	NA	NA	NA	NA	NA	NA	NA	NA	NA	NA	NA	NA
GO:0002052~positive regulation of neuroblast proliferation	NA	NA	NA	5	0.01771	0.772281	NA	NA	NA	NA	NA	NA	NA	NA	NA	NA	NA	NA	NA	NA	NA	NA	NA	NA	NA	NA	NA	NA	NA	NA
GO:0043066~negative regulation of apoptotic process	NA	NA	NA	27	0.0179021	0.765218	NA	NA	NA	NA	NA	NA	NA	NA	NA	NA	NA	NA	NA	NA	NA	21	0.041064	0.861481	NA	NA	NA	NA	NA	NA
GO:0008584~male gonad development	NA	NA	NA	9	0.0179095	0.754822	NA	NA	NA	NA	NA	NA	NA	NA	NA	NA	NA	NA	NA	NA	NA	NA	NA	NA	NA	NA	NA	NA	NA	NA
GO:0004871~signal transducer activity	NA	NA	NA	25	0.0184747	0.757157	NA	NA	NA	NA	NA	NA	59	0.0483751	0.96937	NA	NA	NA	NA	NA	NA	22	0.00727256	0.782492	NA	NA	NA	NA	NA	NA
GO:0006936~muscle contraction	NA	NA	NA	6	0.0196531	0.776554	NA	NA	NA	NA	NA	NA	NA	NA	NA	NA	NA	NA	NA	NA	NA	NA	NA	NA	NA	NA	NA	NA	NA	NA
GO:0007212~dopamine receptor signaling pathway	NA	NA	NA	4	0.0198301	0.769847	NA	NA	NA	NA	NA	NA	NA	NA	NA	NA	NA	NA	NA	NA	NA	5	0.000933677	0.185764	NA	NA	NA	9	0.000220064	0.0638048
GO:0072583~clathrin-mediated endocytosis	NA	NA	NA	4	0.0198301	0.769847	NA	NA	NA	NA	NA	NA	NA	NA	NA	NA	NA	NA	NA	NA	NA	NA	NA	NA	NA	NA	NA	NA	NA	NA
GO:0031000~response to caffeine	NA	NA	NA	4	0.0198301	0.769847	NA	NA	NA	NA	NA	NA	NA	NA	NA	NA	NA	NA	NA	NA	NA	NA	NA	NA	NA	NA	NA	NA	NA	NA
GO:0045880~positive regulation of smoothened signaling pathway	NA	NA	NA	5	0.0203897	0.769828	NA	NA	NA	NA	NA	NA	NA	NA	NA	NA	NA	NA	NA	NA	NA	NA	NA	NA	NA	NA	NA	NA	NA	NA
GO:0042391~regulation of membrane potential	NA	NA	NA	9	0.0205769	0.76366	NA	NA	NA	19	0.0047956	0.404766	NA	NA	NA	23	0.000165815	0.0578081	NA	NA	NA	NA	NA	NA	NA	NA	NA	27	3.17426e-05	0.0122712
GO:0001662~behavioral fear response	NA	NA	NA	6	0.0218609	0.766566	NA	NA	NA	NA	NA	NA	NA	NA	NA	10	0.0333796	0.898303	NA	NA	NA	NA	NA	NA	NA	NA	NA	13	0.00491143	0.517821
GO:0021766~hippocampus development	NA	NA	NA	8	0.023726	0.785827	NA	NA	NA	16	0.00890848	0.529179	NA	NA	NA	NA	NA	NA	NA	NA	NA	NA	NA	NA	NA	NA	NA	17	0.0231864	1
GO:2000251~positive regulation of actin cytoskeleton reorganization	NA	NA	NA	4	0.0240172	0.781738	NA	NA	NA	NA	NA	NA	NA	NA	NA	NA	NA	NA	NA	NA	NA	NA	NA	NA	NA	NA	NA	NA	NA	NA
GO:0030913~paranodal junction assembly	NA	NA	NA	3	0.0243559	0.778435	NA	NA	NA	NA	NA	NA	NA	NA	NA	NA	NA	NA	NA	NA	NA	NA	NA	NA	NA	NA	NA	NA	NA	NA
GO:0060406~positive regulation of penile erection	NA	NA	NA	3	0.0243559	0.778435	NA	NA	NA	NA	NA	NA	NA	NA	NA	NA	NA	NA	NA	NA	NA	NA	NA	NA	NA	NA	NA	NA	NA	NA
GO:0071467~cellular response to pH	NA	NA	NA	3	0.0243559	0.778435	NA	NA	NA	NA	NA	NA	NA	NA	NA	NA	NA	NA	NA	NA	NA	NA	NA	NA	NA	NA	NA	NA	NA	NA
GO:0015670~carbon dioxide transport	NA	NA	NA	3	0.0243559	0.778435	NA	NA	NA	NA	NA	NA	NA	NA	NA	NA	NA	NA	NA	NA	NA	NA	NA	NA	NA	NA	NA	NA	NA	NA
GO:0004865~protein serine/threonine phosphatase inhibitor activity	NA	NA	NA	3	0.0247346	0.794875	NA	NA	NA	NA	NA	NA	NA	NA	NA	NA	NA	NA	NA	NA	NA	NA	NA	NA	NA	NA	NA	NA	NA	NA
GO:0019841~retinol binding	NA	NA	NA	3	0.0247346	0.794875	NA	NA	NA	NA	NA	NA	NA	NA	NA	NA	NA	NA	NA	NA	NA	NA	NA	NA	NA	NA	NA	NA	NA	NA
GO:0035725~sodium ion transmembrane transport	NA	NA	NA	5	0.0264616	0.7983	NA	NA	NA	NA	NA	NA	NA	NA	NA	9	0.014786	0.767492	NA	NA	NA	NA	NA	NA	NA	NA	NA	NA	NA	NA
GO:0004864~protein phosphatase inhibitor activity	NA	NA	NA	5	0.0271652	0.799706	NA	NA	NA	NA	NA	NA	NA	NA	NA	NA	NA	NA	NA	NA	NA	NA	NA	NA	NA	NA	NA	10	0.0112352	0.560984
GO:0048365~Rac GTPase binding	NA	NA	NA	6	0.0275777	0.780435	NA	NA	NA	14	0.000479294	0.0814177	NA	NA	NA	12	0.00768307	0.492734	NA	NA	NA	NA	NA	NA	NA	NA	NA	12	0.024058	0.82943
GO:0008542~visual learning	NA	NA	NA	7	0.029119	0.821659	NA	NA	NA	16	0.00116382	0.18472	NA	NA	NA	16	0.00166973	0.250265	NA	NA	NA	6	0.0357683	0.850112	NA	NA	NA	23	2.28785e-06	0.00132667
GO:0051491~positive regulation of filopodium assembly	NA	NA	NA	5	0.0298614	0.822606	NA	NA	NA	NA	NA	NA	NA	NA	NA	NA	NA	NA	NA	NA	NA	NA	NA	NA	NA	NA	NA	NA	NA	NA
mmu04080:Neuroactive ligand-receptor interaction	NA	NA	NA	15	0.0318019	0.292975	NA	NA	NA	40	5.6176e-05	0.00290577	NA	NA	NA	43	7.26861e-05	0.00482214	NA	NA	NA	13	0.0204203	0.397473	NA	NA	NA	49	1.7868e-05	0.000815974
GO:0050927~positive regulation of positive chemotaxis	NA	NA	NA	3	0.033145	0.847559	NA	NA	NA	NA	NA	NA	NA	NA	NA	NA	NA	NA	NA	NA	NA	NA	NA	NA	NA	NA	NA	NA	NA	NA
GO:0030672~synaptic vesicle membrane	NA	NA	NA	7	0.0333328	0.580823	NA	NA	NA	NA	NA	NA	NA	NA	NA	NA	NA	NA	NA	NA	NA	NA	NA	NA	NA	NA	NA	NA	NA	NA
GO:0051209~release of sequestered calcium ion into cytosol	NA	NA	NA	5	0.0335074	0.844551	NA	NA	NA	NA	NA	NA	NA	NA	NA	NA	NA	NA	NA	NA	NA	NA	NA	NA	NA	NA	NA	9	0.0443347	1
mmu04925:Aldosterone synthesis and secretion	NA	NA	NA	8	0.0336102	0.295875	NA	NA	NA	17	0.0040713	0.0602619	NA	NA	NA	18	0.00473908	0.0716338	NA	NA	NA	NA	NA	NA	NA	NA	NA	22	0.000703365	0.0148248
GO:0016918~retinal binding	NA	NA	NA	3	0.0336524	0.802865	NA	NA	NA	NA	NA	NA	NA	NA	NA	NA	NA	NA	NA	NA	NA	NA	NA	NA	NA	NA	NA	NA	NA	NA
GO:0004674~protein serine/threonine kinase activity	NA	NA	NA	25	0.0337034	0.783616	NA	NA	NA	NA	NA	NA	NA	NA	NA	NA	NA	NA	NA	NA	NA	NA	NA	NA	NA	NA	NA	NA	NA	NA
GO:0007030~Golgi organization	NA	NA	NA	8	0.0358261	0.857884	NA	NA	NA	NA	NA	NA	NA	NA	NA	16	0.0257969	0.875756	NA	NA	NA	NA	NA	NA	NA	NA	NA	19	0.0120401	0.886573
mmu04022:cGMP-PKG signaling pathway	NA	NA	NA	12	0.0369392	0.309344	NA	NA	NA	29	0.00113854	0.0264662	NA	NA	NA	26	0.0318511	0.323874	NA	NA	NA	13	0.00200958	0.358896	NA	NA	NA	34	0.00199445	0.034155
GO:0048678~response to axon injury	NA	NA	NA	5	0.0374013	0.85872	NA	NA	NA	NA	NA	NA	NA	NA	NA	NA	NA	NA	NA	NA	NA	NA	NA	NA	NA	NA	NA	NA	NA	NA
GO:0004930~G-protein coupled receptor activity	NA	NA	NA	18	0.038628	0.810072	NA	NA	NA	NA	NA	NA	NA	NA	NA	NA	NA	NA	NA	NA	NA	16	0.0188939	0.863756	NA	NA	NA	NA	NA	NA
mmu04724:Glutamatergic synapse	NA	NA	NA	10	0.0391521	0.314101	NA	NA	NA	24	0.00101947	0.026072	NA	NA	NA	25	0.0018492	0.0303028	NA	NA	NA	NA	NA	NA	NA	NA	NA	33	1.74924e-05	0.000815974
GO:0035855~megakaryocyte development	NA	NA	NA	4	0.0391975	0.866366	NA	NA	NA	NA	NA	NA	NA	NA	NA	NA	NA	NA	NA	NA	NA	NA	NA	NA	NA	NA	NA	NA	NA	NA
GO:0045944~positive regulation of transcription from RNA polymerase II promoter	NA	NA	NA	45	0.0411403	0.874301	NA	NA	NA	114	0.0121814	0.615303	NA	NA	NA	NA	NA	NA	NA	NA	NA	NA	NA	NA	NA	NA	NA	138	0.00716722	0.651936
GO:0043198~dendritic shaft	NA	NA	NA	7	0.0412432	0.619585	NA	NA	NA	20	3.95686e-05	0.00184569	NA	NA	NA	22	4.32873e-06	0.000281328	NA	NA	NA	8	0.00368542	0.163294	NA	NA	NA	26	2.28906e-07	1.8633e-05
GO:0006470~protein dephosphorylation	NA	NA	NA	11	0.0413218	0.870478	NA	NA	NA	NA	NA	NA	NA	NA	NA	NA	NA	NA	NA	NA	NA	NA	NA	NA	NA	NA	NA	NA	NA	NA
GO:0071313~cellular response to caffeine	NA	NA	NA	3	0.0429623	0.876	NA	NA	NA	NA	NA	NA	NA	NA	NA	NA	NA	NA	NA	NA	NA	NA	NA	NA	NA	NA	NA	NA	NA	NA
GO:0046039~GTP metabolic process	NA	NA	NA	3	0.0429623	0.876	NA	NA	NA	NA	NA	NA	NA	NA	NA	NA	NA	NA	NA	NA	NA	NA	NA	NA	NA	NA	NA	NA	NA	NA
GO:0005576~extracellular region	NA	NA	NA	51	0.0438508	0.623765	160	3.47378e-05	0.0116214	NA	NA	NA	153	0.00283338	0.464325	NA	NA	NA	45	1.80765e-08	5.1337e-06	45	0.0105023	0.240051	152	0.0201169	1	NA	NA	NA
mmu04971:Gastric acid secretion	NA	NA	NA	7	0.0443666	0.327439	NA	NA	NA	14	0.0144372	0.151055	NA	NA	NA	NA	NA	NA	NA	NA	NA	NA	NA	NA	NA	NA	NA	16	0.0229631	0.215377
GO:0030336~negative regulation of cell migration	NA	NA	NA	9	0.0450169	0.883495	NA	NA	NA	NA	NA	NA	NA	NA	NA	NA	NA	NA	NA	NA	NA	10	0.00378164	0.464821	NA	NA	NA	NA	NA	NA
GO:0051899~membrane depolarization	NA	NA	NA	4	0.0451141	0.879499	NA	NA	NA	NA	NA	NA	NA	NA	NA	NA	NA	NA	NA	NA	NA	NA	NA	NA	NA	NA	NA	7	0.0425252	1
GO:0051897~positive regulation of protein kinase B signaling	NA	NA	NA	7	0.0451557	0.875186	NA	NA	NA	NA	NA	NA	NA	NA	NA	NA	NA	NA	NA	NA	NA	NA	NA	NA	NA	NA	NA	NA	NA	NA
GO:0016324~apical plasma membrane	NA	NA	NA	17	0.0453957	0.618851	NA	NA	NA	NA	NA	NA	NA	NA	NA	NA	NA	NA	11	0.0172385	0.627561	NA	NA	NA	NA	NA	NA	NA	NA	NA
GO:0005929~cilium	NA	NA	NA	16	0.0458348	0.605383	43	0.00358398	0.291916	NA	NA	NA	41	0.0236061	0.731232	NA	NA	NA	NA	NA	NA	NA	NA	NA	42	0.0366365	1	NA	NA	NA
mmu04912:GnRH signaling pathway	NA	NA	NA	8	0.0463347	0.329594	NA	NA	NA	18	0.00341351	0.0573317	NA	NA	NA	16	0.0470599	0.378047	NA	NA	NA	NA	NA	NA	NA	NA	NA	22	0.00186759	0.0341146
GO:0045666~positive regulation of neuron differentiation	NA	NA	NA	8	0.0485759	0.889625	NA	NA	NA	16	0.0335781	0.826771	NA	NA	NA	16	0.0439313	0.924311	NA	NA	NA	NA	NA	NA	NA	NA	NA	NA	NA	NA
GO:0004721~phosphoprotein phosphatase activity	NA	NA	NA	11	0.0494635	0.868201	NA	NA	NA	NA	NA	NA	NA	NA	NA	NA	NA	NA	NA	NA	NA	NA	NA	NA	NA	NA	NA	NA	NA	NA
GO:0016311~dephosphorylation	NA	NA	NA	9	0.0499747	0.892529	NA	NA	NA	NA	NA	NA	NA	NA	NA	NA	NA	NA	NA	NA	NA	NA	NA	NA	NA	NA	NA	NA	NA	NA
mmu03320:PPAR signaling pathway	NA	NA	NA	NA	NA	NA	17	0.000320388	0.0831753	NA	NA	NA	13	0.0236876	0.736284	NA	NA	NA	NA	NA	NA	NA	NA	NA	13	0.028812	0.896373	NA	NA	NA
GO:0030057~desmosome	NA	NA	NA	NA	NA	NA	9	0.000508287	0.107791	NA	NA	NA	8	0.00397098	0.408571	NA	NA	NA	NA	NA	NA	NA	NA	NA	7	0.0228044	1	NA	NA	NA
mmu04060:Cytokine-cytokine receptor interaction	NA	NA	NA	NA	NA	NA	27	0.00142964	0.176222	NA	NA	NA	NA	NA	NA	NA	NA	NA	NA	NA	NA	NA	NA	NA	24	0.0255073	0.896373	NA	NA	NA
GO:0005615~extracellular space	NA	NA	NA	NA	NA	NA	126	0.00216466	0.252992	NA	NA	NA	123	0.0244767	0.663909	NA	NA	NA	32	8.45305e-05	0.00797062	NA	NA	NA	129	0.0212854	1	NA	NA	NA
GO:0005578~proteinaceous extracellular matrix	NA	NA	NA	NA	NA	NA	47	0.00217776	0.216934	NA	NA	NA	NA	NA	NA	NA	NA	NA	14	0.000624072	0.043355	NA	NA	NA	NA	NA	NA	NA	NA	NA
GO:0048843~negative regulation of axon extension involved in axon guidance	NA	NA	NA	NA	NA	NA	10	0.00226751	0.991965	NA	NA	NA	9	0.0122096	0.98786	NA	NA	NA	NA	NA	NA	NA	NA	NA	9	0.0156882	1	NA	NA	NA
mmu00480:Glutathione metabolism	NA	NA	NA	NA	NA	NA	14	0.00408485	0.309096	NA	NA	NA	NA	NA	NA	NA	NA	NA	NA	NA	NA	NA	NA	NA	NA	NA	NA	NA	NA	NA
GO:0005543~phospholipid binding	NA	NA	NA	NA	NA	NA	18	0.00553215	0.917921	NA	NA	NA	NA	NA	NA	NA	NA	NA	NA	NA	NA	7	0.0278955	0.830331	NA	NA	NA	NA	NA	NA
GO:0002474~antigen processing and presentation of peptide antigen via MHC class I	NA	NA	NA	NA	NA	NA	8	0.00602477	0.999809	NA	NA	NA	7	0.030792	0.997814	NA	NA	NA	NA	NA	NA	NA	NA	NA	NA	NA	NA	NA	NA	NA
GO:0003341~cilium movement	NA	NA	NA	NA	NA	NA	10	0.00700312	0.999428	NA	NA	NA	NA	NA	NA	NA	NA	NA	NA	NA	NA	NA	NA	NA	10	0.0165165	1	NA	NA	NA
GO:0046596~regulation of viral entry into host cell	NA	NA	NA	NA	NA	NA	4	0.00705639	0.997568	NA	NA	NA	NA	NA	NA	NA	NA	NA	NA	NA	NA	NA	NA	NA	NA	NA	NA	NA	NA	NA
GO:0006749~glutathione metabolic process	NA	NA	NA	NA	NA	NA	13	0.00765575	0.995676	NA	NA	NA	NA	NA	NA	NA	NA	NA	NA	NA	NA	NA	NA	NA	NA	NA	NA	NA	NA	NA
GO:0005811~lipid particle	NA	NA	NA	NA	NA	NA	15	0.00923918	0.541988	NA	NA	NA	14	0.0317048	0.713732	NA	NA	NA	NA	NA	NA	NA	NA	NA	14	0.0469264	1	NA	NA	NA
GO:0005102~receptor binding	NA	NA	NA	NA	NA	NA	55	0.00963806	0.962125	NA	NA	NA	NA	NA	NA	NA	NA	NA	NA	NA	NA	NA	NA	NA	NA	NA	NA	NA	NA	NA
GO:0031514~motile cilium	NA	NA	NA	NA	NA	NA	17	0.0099931	0.528115	NA	NA	NA	NA	NA	NA	NA	NA	NA	NA	NA	NA	NA	NA	NA	NA	NA	NA	NA	NA	NA
GO:0030215~semaphorin receptor binding	NA	NA	NA	NA	NA	NA	8	0.0110541	0.950495	NA	NA	NA	7	0.0488119	0.964934	NA	NA	NA	NA	NA	NA	NA	NA	NA	NA	NA	NA	NA	NA	NA
GO:0051764~actin crosslink formation	NA	NA	NA	NA	NA	NA	6	0.0112156	0.998938	NA	NA	NA	NA	NA	NA	NA	NA	NA	NA	NA	NA	NA	NA	NA	NA	NA	NA	NA	NA	NA
GO:0004364~glutathione transferase activity	NA	NA	NA	NA	NA	NA	9	0.011362	0.923837	NA	NA	NA	NA	NA	NA	NA	NA	NA	NA	NA	NA	NA	NA	NA	NA	NA	NA	NA	NA	NA
GO:0045499~chemorepellent activity	NA	NA	NA	NA	NA	NA	9	0.011362	0.923837	NA	NA	NA	9	0.0155667	0.957203	NA	NA	NA	NA	NA	NA	NA	NA	NA	10	0.00597488	1	NA	NA	NA
GO:0030317~sperm motility	NA	NA	NA	NA	NA	NA	12	0.0120293	0.998386	NA	NA	NA	11	0.0429202	0.999089	NA	NA	NA	NA	NA	NA	NA	NA	NA	NA	NA	NA	NA	NA	NA
GO:0007157~heterophilic cell-cell adhesion via plasma membrane cell adhesion molecules	NA	NA	NA	NA	NA	NA	12	0.0143876	0.998934	NA	NA	NA	12	0.0209784	0.996687	NA	NA	NA	NA	NA	NA	NA	NA	NA	NA	NA	NA	NA	NA	NA
GO:0030855~epithelial cell differentiation	NA	NA	NA	NA	NA	NA	13	0.0153566	0.998608	NA	NA	NA	NA	NA	NA	NA	NA	NA	NA	NA	NA	NA	NA	NA	NA	NA	NA	NA	NA	NA
GO:0030550~acetylcholine receptor inhibitor activity	NA	NA	NA	NA	NA	NA	4	0.0159595	0.95528	NA	NA	NA	NA	NA	NA	NA	NA	NA	NA	NA	NA	NA	NA	NA	NA	NA	NA	NA	NA	NA
GO:0002934~desmosome organization	NA	NA	NA	NA	NA	NA	4	0.0160022	0.998036	NA	NA	NA	NA	NA	NA	NA	NA	NA	NA	NA	NA	NA	NA	NA	NA	NA	NA	NA	NA	NA
GO:0005861~troponin complex	NA	NA	NA	NA	NA	NA	4	0.0161324	0.630297	NA	NA	NA	4	0.0335542	0.694428	NA	NA	NA	NA	NA	NA	NA	NA	NA	4	0.0389379	1	NA	NA	NA
mmu00980:Metabolism of xenobiotics by cytochrome P450	NA	NA	NA	NA	NA	NA	11	0.0166418	0.679211	NA	NA	NA	NA	NA	NA	NA	NA	NA	NA	NA	NA	NA	NA	NA	NA	NA	NA	NA	NA	NA
GO:0009566~fertilization	NA	NA	NA	NA	NA	NA	10	0.0170505	0.997736	NA	NA	NA	NA	NA	NA	NA	NA	NA	NA	NA	NA	NA	NA	NA	12	0.00344946	1	NA	NA	NA
GO:0030431~sleep	NA	NA	NA	NA	NA	NA	5	0.0181798	0.997517	NA	NA	NA	NA	NA	NA	NA	NA	NA	NA	NA	NA	NA	NA	NA	NA	NA	NA	NA	NA	NA
GO:1902902~negative regulation of autophagosome assembly	NA	NA	NA	NA	NA	NA	5	0.0181798	0.997517	NA	NA	NA	NA	NA	NA	NA	NA	NA	NA	NA	NA	NA	NA	NA	NA	NA	NA	NA	NA	NA
GO:0050839~cell adhesion molecule binding	NA	NA	NA	NA	NA	NA	14	0.0183904	0.956583	NA	NA	NA	14	0.0276563	0.962599	NA	NA	NA	NA	NA	NA	NA	NA	NA	14	0.0378134	1	NA	NA	NA
GO:0006937~regulation of muscle contraction	NA	NA	NA	NA	NA	NA	7	0.0184345	0.996477	NA	NA	NA	NA	NA	NA	NA	NA	NA	NA	NA	NA	NA	NA	NA	8	0.0103083	1	NA	NA	NA
GO:0048168~regulation of neuronal synaptic plasticity	NA	NA	NA	NA	NA	NA	8	0.0187476	0.99531	8	0.0129384	0.624239	NA	NA	NA	8	0.0155661	0.777375	NA	NA	NA	NA	NA	NA	NA	NA	NA	9	0.0109893	0.822247
GO:0000082~G1/S transition of mitotic cell cycle	NA	NA	NA	NA	NA	NA	14	0.0213465	0.995458	NA	NA	NA	NA	NA	NA	NA	NA	NA	NA	NA	NA	NA	NA	NA	NA	NA	NA	NA	NA	NA
GO:0031012~extracellular matrix	NA	NA	NA	NA	NA	NA	42	0.0219857	0.712573	NA	NA	NA	NA	NA	NA	NA	NA	NA	16	4.69311e-05	0.00664222	NA	NA	NA	NA	NA	NA	NA	NA	NA
GO:0030148~sphingolipid biosynthetic process	NA	NA	NA	NA	NA	NA	8	0.0236871	0.993867	NA	NA	NA	9	0.00704117	0.977762	NA	NA	NA	NA	NA	NA	NA	NA	NA	8	0.0306087	1	NA	NA	NA
GO:0050919~negative chemotaxis	NA	NA	NA	NA	NA	NA	8	0.0236871	0.993867	NA	NA	NA	8	0.0309964	0.997258	NA	NA	NA	NA	NA	NA	NA	NA	NA	9	0.0120961	1	NA	NA	NA
GO:0030670~phagocytic vesicle membrane	NA	NA	NA	NA	NA	NA	11	0.0269482	0.756887	NA	NA	NA	12	0.014673	0.70462	NA	NA	NA	NA	NA	NA	NA	NA	NA	12	0.0216216	1	NA	NA	NA
GO:0030308~negative regulation of cell growth	NA	NA	NA	NA	NA	NA	22	0.0276077	0.996538	NA	NA	NA	NA	NA	NA	NA	NA	NA	NA	NA	NA	NA	NA	NA	NA	NA	NA	NA	NA	NA
GO:0001527~microfibril	NA	NA	NA	NA	NA	NA	5	0.0276182	0.739806	NA	NA	NA	NA	NA	NA	NA	NA	NA	NA	NA	NA	NA	NA	NA	NA	NA	NA	NA	NA	NA
GO:0021637~trigeminal nerve structural organization	NA	NA	NA	NA	NA	NA	4	0.0290522	0.996639	NA	NA	NA	4	0.0336181	0.996543	NA	NA	NA	NA	NA	NA	NA	NA	NA	4	0.0377423	1	NA	NA	NA
GO:0007601~visual perception	NA	NA	NA	NA	NA	NA	17	0.0298832	0.996325	NA	NA	NA	17	0.0460857	0.999098	NA	NA	NA	NA	NA	NA	NA	NA	NA	NA	NA	NA	NA	NA	NA
GO:0051092~positive regulation of NF-kappaB transcription factor activity	NA	NA	NA	NA	NA	NA	20	0.02993	0.995397	NA	NA	NA	NA	NA	NA	NA	NA	NA	NA	NA	NA	NA	NA	NA	NA	NA	NA	NA	NA	NA
GO:0008045~motor neuron axon guidance	NA	NA	NA	NA	NA	NA	7	0.0309664	0.99524	NA	NA	NA	8	0.0111198	0.99192	NA	NA	NA	NA	NA	NA	NA	NA	NA	7	0.0471815	1	NA	NA	NA
mmu00600:Sphingolipid metabolism	NA	NA	NA	NA	NA	NA	11	0.0320485	0.828894	NA	NA	NA	11	0.0260118	0.705114	NA	NA	NA	NA	NA	NA	NA	NA	NA	11	0.0407924	1	NA	NA	NA
GO:0008152~metabolic process	NA	NA	NA	NA	NA	NA	61	0.0334604	0.996163	NA	NA	NA	NA	NA	NA	NA	NA	NA	NA	NA	NA	NA	NA	NA	NA	NA	NA	NA	NA	NA
GO:0007015~actin filament organization	NA	NA	NA	NA	NA	NA	16	0.0342778	0.995873	NA	NA	NA	NA	NA	NA	NA	NA	NA	NA	NA	NA	NA	NA	NA	NA	NA	NA	NA	NA	NA
GO:0005930~axoneme	NA	NA	NA	NA	NA	NA	16	0.0350755	0.777284	NA	NA	NA	NA	NA	NA	NA	NA	NA	NA	NA	NA	NA	NA	NA	NA	NA	NA	NA	NA	NA
GO:0008013~beta-catenin binding	NA	NA	NA	NA	NA	NA	17	0.0366646	0.996344	NA	NA	NA	20	0.00692708	0.858389	NA	NA	NA	NA	NA	NA	NA	NA	NA	22	0.00218409	1	NA	NA	NA
mmu00982:Drug metabolism - cytochrome P450	NA	NA	NA	NA	NA	NA	10	0.0367482	0.718689	NA	NA	NA	NA	NA	NA	NA	NA	NA	NA	NA	NA	NA	NA	NA	NA	NA	NA	NA	NA	NA
mmu05204:Chemical carcinogenesis	NA	NA	NA	NA	NA	NA	11	0.0370935	0.679595	NA	NA	NA	NA	NA	NA	NA	NA	NA	NA	NA	NA	NA	NA	NA	NA	NA	NA	NA	NA	NA
GO:0021675~nerve development	NA	NA	NA	NA	NA	NA	5	0.0388176	0.997544	NA	NA	NA	5	0.0462602	0.99889	NA	NA	NA	NA	NA	NA	NA	NA	NA	NA	NA	NA	NA	NA	NA
GO:0008037~cell recognition	NA	NA	NA	NA	NA	NA	5	0.0388176	0.997544	NA	NA	NA	5	0.0462602	0.99889	NA	NA	NA	NA	NA	NA	NA	NA	NA	NA	NA	NA	NA	NA	NA
GO:0051497~negative regulation of stress fiber assembly	NA	NA	NA	NA	NA	NA	7	0.0389081	0.99702	NA	NA	NA	NA	NA	NA	NA	NA	NA	NA	NA	NA	NA	NA	NA	NA	NA	NA	NA	NA	NA
GO:0030017~sarcomere	NA	NA	NA	NA	NA	NA	9	0.0397711	0.799438	NA	NA	NA	NA	NA	NA	NA	NA	NA	NA	NA	NA	NA	NA	NA	NA	NA	NA	NA	NA	NA
GO:0031941~filamentous actin	NA	NA	NA	NA	NA	NA	9	0.0397711	0.799438	NA	NA	NA	NA	NA	NA	NA	NA	NA	NA	NA	NA	NA	NA	NA	10	0.0269433	1	NA	NA	NA
mmu00410:beta-Alanine metabolism	NA	NA	NA	NA	NA	NA	8	0.0399791	0.669016	NA	NA	NA	NA	NA	NA	NA	NA	NA	NA	NA	NA	NA	NA	NA	NA	NA	NA	NA	NA	NA
GO:0070569~uridylyltransferase activity	NA	NA	NA	NA	NA	NA	3	0.0428194	0.997306	NA	NA	NA	NA	NA	NA	NA	NA	NA	NA	NA	NA	NA	NA	NA	NA	NA	NA	NA	NA	NA
GO:0060084~synaptic transmission involved in micturition	NA	NA	NA	NA	NA	NA	3	0.0428968	0.997993	NA	NA	NA	NA	NA	NA	NA	NA	NA	NA	NA	NA	NA	NA	NA	NA	NA	NA	NA	NA	NA
GO:0051918~negative regulation of fibrinolysis	NA	NA	NA	NA	NA	NA	3	0.0428968	0.997993	NA	NA	NA	3	0.0475787	0.99859	NA	NA	NA	NA	NA	NA	NA	NA	NA	NA	NA	NA	NA	NA	NA
GO:2001034~positive regulation of double-strand break repair via nonhomologous end joining	NA	NA	NA	NA	NA	NA	3	0.0428968	0.997993	NA	NA	NA	NA	NA	NA	NA	NA	NA	NA	NA	NA	NA	NA	NA	NA	NA	NA	NA	NA	NA
GO:0009991~response to extracellular stimulus	NA	NA	NA	NA	NA	NA	3	0.0428968	0.997993	NA	NA	NA	NA	NA	NA	NA	NA	NA	NA	NA	NA	NA	NA	NA	NA	NA	NA	NA	NA	NA
GO:0000053~argininosuccinate metabolic process	NA	NA	NA	NA	NA	NA	3	0.0428968	0.997993	NA	NA	NA	NA	NA	NA	NA	NA	NA	NA	NA	NA	NA	NA	NA	NA	NA	NA	NA	NA	NA
GO:0021612~facial nerve structural organization	NA	NA	NA	NA	NA	NA	4	0.0461854	0.99847	NA	NA	NA	NA	NA	NA	NA	NA	NA	NA	NA	NA	NA	NA	NA	NA	NA	NA	NA	NA	NA
GO:0019372~lipoxygenase pathway	NA	NA	NA	NA	NA	NA	4	0.0461854	0.99847	NA	NA	NA	NA	NA	NA	NA	NA	NA	NA	NA	NA	NA	NA	NA	NA	NA	NA	NA	NA	NA
GO:0095500~acetylcholine receptor signaling pathway	NA	NA	NA	NA	NA	NA	4	0.0461854	0.99847	NA	NA	NA	NA	NA	NA	NA	NA	NA	NA	NA	NA	NA	NA	NA	NA	NA	NA	NA	NA	NA
GO:0007612~learning	NA	NA	NA	NA	NA	NA	NA	NA	NA	25	7.6216e-08	0.000320742	NA	NA	NA	20	0.000127203	0.0486109	NA	NA	NA	7	0.019486	0.789554	NA	NA	NA	29	9.33714e-09	4.3315e-05
GO:0008076~voltage-gated potassium channel complex	NA	NA	NA	NA	NA	NA	NA	NA	NA	26	1.33724e-07	9.98915e-06	NA	NA	NA	26	3.31103e-07	2.86952e-05	NA	NA	NA	NA	NA	NA	NA	NA	NA	28	3.32496e-07	2.46047e-05
GO:0048167~regulation of synaptic plasticity	NA	NA	NA	NA	NA	NA	NA	NA	NA	19	3.09675e-07	0.000651498	NA	NA	NA	16	6.29367e-05	0.0380024	NA	NA	NA	8	0.00042725	0.190658	NA	NA	NA	20	1.20952e-06	0.000840704
GO:0060291~long-term synaptic potentiation	NA	NA	NA	NA	NA	NA	NA	NA	NA	20	6.49973e-07	0.000911497	NA	NA	NA	20	1.12364e-06	0.00483008	NA	NA	NA	6	0.0212285	0.757358	NA	NA	NA	22	4.30946e-07	0.000840704
mmu04721:Synaptic vesicle cycle	NA	NA	NA	NA	NA	NA	NA	NA	NA	20	4.10732e-06	0.00106323	NA	NA	NA	15	0.0064259	0.0908698	NA	NA	NA	NA	NA	NA	NA	NA	NA	18	0.00154494	0.0302367
GO:0005249~voltage-gated potassium channel activity	NA	NA	NA	NA	NA	NA	NA	NA	NA	21	7.72218e-06	0.00952984	NA	NA	NA	20	6.96718e-05	0.0878675	NA	NA	NA	NA	NA	NA	NA	NA	NA	24	3.42719e-06	0.00237987
GO:0043195~terminal bouton	NA	NA	NA	NA	NA	NA	NA	NA	NA	28	8.78884e-06	0.000504895	NA	NA	NA	23	0.00196947	0.0553605	NA	NA	NA	NA	NA	NA	NA	NA	NA	26	0.00137617	0.0487044
GO:0030426~growth cone	NA	NA	NA	NA	NA	NA	NA	NA	NA	38	1.04855e-05	0.000559325	NA	NA	NA	36	0.000115661	0.00562292	NA	NA	NA	NA	NA	NA	NA	NA	NA	34	0.00734418	0.160228
GO:0042734~presynaptic membrane	NA	NA	NA	NA	NA	NA	NA	NA	NA	22	2.97577e-05	0.00148086	NA	NA	NA	19	0.00124539	0.0413806	NA	NA	NA	NA	NA	NA	NA	NA	NA	22	0.000445927	0.0201658
GO:0019228~neuronal action potential	NA	NA	NA	NA	NA	NA	NA	NA	NA	13	2.98096e-05	0.0206946	NA	NA	NA	15	1.70904e-06	0.00367535	NA	NA	NA	NA	NA	NA	NA	NA	NA	16	5.86159e-07	0.000840704
mmu05016:Huntington's disease	NA	NA	NA	NA	NA	NA	NA	NA	NA	39	4.57148e-05	0.00393902	NA	NA	NA	39	0.000595507	0.0157203	NA	NA	NA	NA	NA	NA	NA	NA	NA	40	0.00556957	0.080319
GO:0050885~neuromuscular process controlling balance	NA	NA	NA	NA	NA	NA	NA	NA	NA	18	4.81723e-05	0.0285505	NA	NA	NA	16	0.000890608	0.167087	NA	NA	NA	NA	NA	NA	NA	NA	NA	19	0.000175227	0.0541918
GO:0006813~potassium ion transport	NA	NA	NA	NA	NA	NA	NA	NA	NA	28	6.85167e-05	0.0354076	24	0.0113881	0.988741	27	0.000317612	0.0819931	NA	NA	NA	9	0.0264588	0.799894	NA	NA	NA	33	2.09257e-05	0.00998309
GO:0071805~potassium ion transmembrane transport	NA	NA	NA	NA	NA	NA	NA	NA	NA	22	0.000107493	0.0442379	NA	NA	NA	21	0.000609052	0.135708	NA	NA	NA	NA	NA	NA	NA	NA	NA	24	0.000240505	0.0656294
mmu05010:Alzheimer's disease	NA	NA	NA	NA	NA	NA	NA	NA	NA	35	0.000107825	0.00464389	NA	NA	NA	45	1.17933e-07	3.13698e-05	NA	NA	NA	NA	NA	NA	NA	NA	NA	42	0.000108621	0.00320961
GO:0000122~negative regulation of transcription from RNA polymerase II promoter	NA	NA	NA	NA	NA	NA	NA	NA	NA	100	0.000134552	0.0501849	NA	NA	NA	NA	NA	NA	NA	NA	NA	NA	NA	NA	NA	NA	NA	103	0.0248584	1
GO:0035640~exploration behavior	NA	NA	NA	NA	NA	NA	NA	NA	NA	9	0.000178612	0.0561935	NA	NA	NA	6	0.035277	0.90413	NA	NA	NA	NA	NA	NA	NA	NA	NA	8	0.00406679	0.461542
GO:0043209~myelin sheath	NA	NA	NA	NA	NA	NA	NA	NA	NA	40	0.000229201	0.00946784	NA	NA	NA	39	0.000844454	0.0308915	NA	NA	NA	NA	NA	NA	NA	NA	NA	43	0.00136017	0.0487044
GO:0086091~regulation of heart rate by cardiac conduction	NA	NA	NA	NA	NA	NA	NA	NA	NA	11	0.000275806	0.0795849	NA	NA	NA	9	0.00924226	0.670899	NA	NA	NA	NA	NA	NA	NA	NA	NA	9	0.0186972	1
GO:0048511~rhythmic process	NA	NA	NA	NA	NA	NA	NA	NA	NA	29	0.000291125	0.078453	NA	NA	NA	28	0.00116666	0.196437	NA	NA	NA	NA	NA	NA	NA	NA	NA	39	1.21769e-06	0.000840704
GO:0007399~nervous system development	NA	NA	NA	NA	NA	NA	NA	NA	NA	62	0.000297033	0.0751742	NA	NA	NA	NA	NA	NA	NA	NA	NA	NA	NA	NA	NA	NA	NA	66	0.00554561	0.559262
GO:0031594~neuromuscular junction	NA	NA	NA	NA	NA	NA	NA	NA	NA	18	0.000357022	0.013941	NA	NA	NA	NA	NA	NA	NA	NA	NA	NA	NA	NA	NA	NA	NA	16	0.0170528	0.316967
GO:0048306~calcium-dependent protein binding	NA	NA	NA	NA	NA	NA	NA	NA	NA	18	0.000435543	0.102407	NA	NA	NA	15	0.0132191	0.549967	NA	NA	NA	NA	NA	NA	NA	NA	NA	18	0.00417398	0.355525
GO:0044325~ion channel binding	NA	NA	NA	NA	NA	NA	NA	NA	NA	27	0.00045992	0.0906925	NA	NA	NA	26	0.00288857	0.272545	NA	NA	NA	NA	NA	NA	NA	NA	NA	31	0.000420941	0.0899523
GO:0035235~ionotropic glutamate receptor signaling pathway	NA	NA	NA	NA	NA	NA	NA	NA	NA	8	0.000463816	0.102804	NA	NA	NA	6	0.019823	0.82808	NA	NA	NA	NA	NA	NA	NA	NA	NA	8	0.0015815	0.229268
GO:0017075~syntaxin-1 binding	NA	NA	NA	NA	NA	NA	NA	NA	NA	10	0.000533584	0.0793982	NA	NA	NA	9	0.00348757	0.298645	NA	NA	NA	NA	NA	NA	NA	NA	NA	11	0.000496974	0.0899523
GO:0019901~protein kinase binding	NA	NA	NA	NA	NA	NA	NA	NA	NA	71	0.00065924	0.0868531	NA	NA	NA	72	0.00122231	0.182745	NA	NA	NA	NA	NA	NA	NA	NA	NA	79	0.00459933	0.369991
GO:1990138~neuron projection extension	NA	NA	NA	NA	NA	NA	NA	NA	NA	10	0.000676761	0.132789	NA	NA	NA	NA	NA	NA	NA	NA	NA	NA	NA	NA	NA	NA	NA	NA	NA	NA
GO:0048013~ephrin receptor signaling pathway	NA	NA	NA	NA	NA	NA	NA	NA	NA	14	0.000857741	0.158012	NA	NA	NA	NA	NA	NA	NA	NA	NA	NA	NA	NA	NA	NA	NA	12	0.0291885	1
GO:0032590~dendrite membrane	NA	NA	NA	NA	NA	NA	NA	NA	NA	10	0.000994432	0.034772	NA	NA	NA	8	0.0195622	0.30712	NA	NA	NA	NA	NA	NA	NA	NA	NA	10	0.00377946	0.0952684
GO:0043523~regulation of neuron apoptotic process	NA	NA	NA	NA	NA	NA	NA	NA	NA	11	0.00109275	0.181336	NA	NA	NA	9	0.018317	0.816381	NA	NA	NA	NA	NA	NA	NA	NA	NA	NA	NA	NA
GO:0019905~syntaxin binding	NA	NA	NA	NA	NA	NA	NA	NA	NA	20	0.00112868	0.130672	NA	NA	NA	16	0.0440437	0.782277	NA	NA	NA	NA	NA	NA	NA	NA	NA	21	0.00503602	0.383798
GO:0017146~NMDA selective glutamate receptor complex	NA	NA	NA	NA	NA	NA	NA	NA	NA	7	0.00123489	0.0393373	NA	NA	NA	7	0.00145305	0.0443545	NA	NA	NA	NA	NA	NA	NA	NA	NA	7	0.00332872	0.0874057
mmu04070:Phosphatidylinositol signaling system	NA	NA	NA	NA	NA	NA	NA	NA	NA	22	0.00125934	0.0268313	NA	NA	NA	24	0.000843306	0.0185274	NA	NA	NA	NA	NA	NA	NA	NA	NA	24	0.00649788	0.0847819
GO:0032279~asymmetric synapse	NA	NA	NA	NA	NA	NA	NA	NA	NA	8	0.00127595	0.0389601	NA	NA	NA	7	0.00823202	0.163976	NA	NA	NA	NA	NA	NA	NA	NA	NA	8	0.00386223	0.0952684
GO:0005515~protein binding	NA	NA	NA	NA	NA	NA	NA	NA	NA	471	0.00129707	0.136111	NA	NA	NA	470	0.0340796	0.760762	NA	NA	NA	NA	NA	NA	NA	NA	NA	573	0.000650351	0.104634
GO:0005776~autophagosome	NA	NA	NA	NA	NA	NA	NA	NA	NA	17	0.0013193	0.038679	NA	NA	NA	19	0.000202455	0.00924705	NA	NA	NA	NA	NA	NA	NA	NA	NA	21	0.000161602	0.00876958
GO:0021549~cerebellum development	NA	NA	NA	NA	NA	NA	NA	NA	NA	13	0.00144936	0.216663	NA	NA	NA	NA	NA	NA	NA	NA	NA	NA	NA	NA	NA	NA	NA	11	0.049069	1
GO:0031072~heat shock protein binding	NA	NA	NA	NA	NA	NA	NA	NA	NA	15	0.00154707	0.147846	NA	NA	NA	12	0.0393404	0.770447	NA	NA	NA	NA	NA	NA	NA	NA	NA	14	0.0235739	0.82943
GO:0060292~long term synaptic depression	NA	NA	NA	NA	NA	NA	NA	NA	NA	8	0.00191703	0.250574	NA	NA	NA	6	0.0451634	0.924698	NA	NA	NA	NA	NA	NA	NA	NA	NA	8	0.00607567	0.583469
GO:0005262~calcium channel activity	NA	NA	NA	NA	NA	NA	NA	NA	NA	18	0.00201533	0.175044	NA	NA	NA	21	0.000143663	0.0612596	NA	NA	NA	NA	NA	NA	NA	NA	NA	22	0.00044607	0.0899523
mmu00190:Oxidative phosphorylation	NA	NA	NA	NA	NA	NA	NA	NA	NA	26	0.00223239	0.0435491	NA	NA	NA	29	0.00114499	0.023169	NA	NA	NA	NA	NA	NA	NA	NA	NA	NA	NA	NA
GO:0003954~NADH dehydrogenase activity	NA	NA	NA	NA	NA	NA	NA	NA	NA	7	0.00226066	0.181643	NA	NA	NA	7	0.00282142	0.287553	NA	NA	NA	NA	NA	NA	NA	NA	NA	8	0.00103792	0.15029
GO:0051930~regulation of sensory perception of pain	NA	NA	NA	NA	NA	NA	NA	NA	NA	12	0.00245338	0.291519	NA	NA	NA	14	0.00042168	0.10139	NA	NA	NA	NA	NA	NA	NA	NA	NA	13	0.00384897	0.45783
GO:1903861~positive regulation of dendrite extension	NA	NA	NA	NA	NA	NA	NA	NA	NA	8	0.00282505	0.318945	NA	NA	NA	NA	NA	NA	NA	NA	NA	NA	NA	NA	NA	NA	NA	7	0.0329398	1
GO:0009790~embryo development	NA	NA	NA	NA	NA	NA	NA	NA	NA	18	0.00312021	0.337044	NA	NA	NA	NA	NA	NA	NA	NA	NA	NA	NA	NA	NA	NA	NA	NA	NA	NA
GO:0086005~ventricular cardiac muscle cell action potential	NA	NA	NA	NA	NA	NA	NA	NA	NA	6	0.00321814	0.337094	NA	NA	NA	NA	NA	NA	NA	NA	NA	NA	NA	NA	NA	NA	NA	NA	NA	NA
GO:0050808~synapse organization	NA	NA	NA	NA	NA	NA	NA	NA	NA	11	0.00327265	0.333556	NA	NA	NA	10	0.0136557	0.756019	NA	NA	NA	NA	NA	NA	NA	NA	NA	NA	NA	NA
GO:0097060~synaptic membrane	NA	NA	NA	NA	NA	NA	NA	NA	NA	11	0.0033488	0.0918766	NA	NA	NA	10	0.0135025	0.243494	NA	NA	NA	NA	NA	NA	NA	NA	NA	10	0.0345488	0.562454
GO:0044295~axonal growth cone	NA	NA	NA	NA	NA	NA	NA	NA	NA	10	0.00341233	0.0902353	NA	NA	NA	NA	NA	NA	NA	NA	NA	NA	NA	NA	NA	NA	NA	NA	NA	NA
GO:0008179~adenylate cyclase binding	NA	NA	NA	NA	NA	NA	NA	NA	NA	7	0.00356203	0.241604	NA	NA	NA	6	0.0221162	0.638671	NA	NA	NA	NA	NA	NA	NA	NA	NA	7	0.00984912	0.53168
GO:0035254~glutamate receptor binding	NA	NA	NA	NA	NA	NA	NA	NA	NA	7	0.00356203	0.241604	NA	NA	NA	8	0.000683818	0.139715	NA	NA	NA	NA	NA	NA	NA	NA	NA	9	0.000259367	0.0751126
GO:0005267~potassium channel activity	NA	NA	NA	NA	NA	NA	NA	NA	NA	17	0.00376021	0.240269	NA	NA	NA	16	0.0134311	0.53978	NA	NA	NA	NA	NA	NA	NA	NA	NA	20	0.00207283	0.230881
GO:0016079~synaptic vesicle exocytosis	NA	NA	NA	NA	NA	NA	NA	NA	NA	8	0.00402919	0.376266	NA	NA	NA	7	0.0205165	0.832455	NA	NA	NA	NA	NA	NA	NA	NA	NA	9	0.00285909	0.349035
GO:0007613~memory	NA	NA	NA	NA	NA	NA	NA	NA	NA	18	0.00422129	0.381969	NA	NA	NA	19	0.00291817	0.372743	NA	NA	NA	NA	NA	NA	NA	NA	NA	22	0.00112377	0.179765
GO:0043679~axon terminus	NA	NA	NA	NA	NA	NA	NA	NA	NA	18	0.00436088	0.110056	NA	NA	NA	19	0.00286338	0.0742263	NA	NA	NA	NA	NA	NA	NA	NA	NA	23	0.00037906	0.0181503
GO:0030117~membrane coat	NA	NA	NA	NA	NA	NA	NA	NA	NA	10	0.00444396	0.108389	NA	NA	NA	NA	NA	NA	NA	NA	NA	NA	NA	NA	NA	NA	NA	9	0.042336	0.615384
GO:0006810~transport	NA	NA	NA	NA	NA	NA	NA	NA	NA	214	0.00468828	0.405783	NA	NA	NA	240	2.30305e-05	0.0245047	NA	NA	NA	NA	NA	NA	NA	NA	NA	274	5.84421e-05	0.0208548
GO:0033268~node of Ranvier	NA	NA	NA	NA	NA	NA	NA	NA	NA	7	0.00490905	0.111822	NA	NA	NA	8	0.00057139	0.0231906	NA	NA	NA	NA	NA	NA	NA	NA	NA	8	0.00149836	0.0487867
GO:0046875~ephrin receptor binding	NA	NA	NA	NA	NA	NA	NA	NA	NA	10	0.00498074	0.278102	NA	NA	NA	NA	NA	NA	NA	NA	NA	NA	NA	NA	NA	NA	NA	NA	NA	NA
GO:0060307~regulation of ventricular cardiac muscle cell membrane repolarization	NA	NA	NA	NA	NA	NA	NA	NA	NA	6	0.0053387	0.430656	NA	NA	NA	5	0.0469442	0.927385	NA	NA	NA	NA	NA	NA	NA	NA	NA	NA	NA	NA
GO:0031175~neuron projection development	NA	NA	NA	NA	NA	NA	NA	NA	NA	26	0.00559576	0.437894	NA	NA	NA	NA	NA	NA	NA	NA	NA	NA	NA	NA	NA	NA	NA	NA	NA	NA
GO:0006334~nucleosome assembly	NA	NA	NA	NA	NA	NA	NA	NA	NA	15	0.00567163	0.434473	NA	NA	NA	NA	NA	NA	NA	NA	NA	NA	NA	NA	NA	NA	NA	17	0.00567888	0.560517
GO:0032092~positive regulation of protein binding	NA	NA	NA	NA	NA	NA	NA	NA	NA	16	0.00572892	0.430149	NA	NA	NA	14	0.0395231	0.913477	NA	NA	NA	NA	NA	NA	NA	NA	NA	NA	NA	NA
GO:0017016~Ras GTPase binding	NA	NA	NA	NA	NA	NA	NA	NA	NA	8	0.0062451	0.309206	NA	NA	NA	NA	NA	NA	NA	NA	NA	NA	NA	NA	NA	NA	NA	8	0.0185726	0.747716
GO:0006897~endocytosis	NA	NA	NA	NA	NA	NA	NA	NA	NA	32	0.00659006	0.46873	NA	NA	NA	NA	NA	NA	NA	NA	NA	NA	NA	NA	NA	NA	NA	NA	NA	NA
GO:0060076~excitatory synapse	NA	NA	NA	NA	NA	NA	NA	NA	NA	11	0.00664626	0.144155	NA	NA	NA	13	0.000686918	0.0264431	NA	NA	NA	NA	NA	NA	NA	NA	NA	15	0.000206171	0.0104889
GO:0045956~positive regulation of calcium ion-dependent exocytosis	NA	NA	NA	NA	NA	NA	NA	NA	NA	7	0.00698251	0.480759	NA	NA	NA	NA	NA	NA	NA	NA	NA	NA	NA	NA	NA	NA	NA	9	0.000723294	0.139807
GO:0051966~regulation of synaptic transmission, glutamatergic	NA	NA	NA	NA	NA	NA	NA	NA	NA	8	0.00755007	0.500153	NA	NA	NA	7	0.0332939	0.901329	NA	NA	NA	NA	NA	NA	NA	NA	NA	8	0.0217518	1
GO:0048814~regulation of dendrite morphogenesis	NA	NA	NA	NA	NA	NA	NA	NA	NA	8	0.00755007	0.500153	NA	NA	NA	7	0.0332939	0.901329	NA	NA	NA	NA	NA	NA	NA	NA	NA	8	0.0217518	1
GO:0019904~protein domain specific binding	NA	NA	NA	NA	NA	NA	NA	NA	NA	45	0.00760572	0.349702	NA	NA	NA	NA	NA	NA	NA	NA	NA	NA	NA	NA	NA	NA	NA	49	0.0358063	1
GO:0000149~SNARE binding	NA	NA	NA	NA	NA	NA	NA	NA	NA	15	0.00792997	0.348992	NA	NA	NA	NA	NA	NA	NA	NA	NA	NA	NA	NA	NA	NA	NA	17	0.00845875	0.510345
GO:0006337~nucleosome disassembly	NA	NA	NA	NA	NA	NA	NA	NA	NA	6	0.00828442	0.525259	NA	NA	NA	5	0.0469442	0.927385	NA	NA	NA	NA	NA	NA	NA	NA	NA	NA	NA	NA
GO:0061001~regulation of dendritic spine morphogenesis	NA	NA	NA	NA	NA	NA	NA	NA	NA	6	0.00828442	0.525259	NA	NA	NA	5	0.0469442	0.927385	NA	NA	NA	NA	NA	NA	NA	NA	NA	6	0.0191234	1
GO:1901381~positive regulation of potassium ion transmembrane transport	NA	NA	NA	NA	NA	NA	NA	NA	NA	6	0.00828442	0.525259	NA	NA	NA	NA	NA	NA	NA	NA	NA	NA	NA	NA	NA	NA	NA	NA	NA	NA
GO:0005251~delayed rectifier potassium channel activity	NA	NA	NA	NA	NA	NA	NA	NA	NA	9	0.00843893	0.343181	NA	NA	NA	NA	NA	NA	NA	NA	NA	NA	NA	NA	NA	NA	NA	9	0.0269273	0.868825
GO:0006887~exocytosis	NA	NA	NA	NA	NA	NA	NA	NA	NA	20	0.00873283	0.536581	NA	NA	NA	NA	NA	NA	NA	NA	NA	NA	NA	NA	NA	NA	NA	24	0.00412073	0.461542
GO:0036477~somatodendritic compartment	NA	NA	NA	NA	NA	NA	NA	NA	NA	5	0.00876307	0.180645	NA	NA	NA	NA	NA	NA	NA	NA	NA	NA	NA	NA	NA	NA	NA	NA	NA	NA
GO:0046426~negative regulation of JAK-STAT cascade	NA	NA	NA	NA	NA	NA	NA	NA	NA	10	0.00884987	0.534	NA	NA	NA	10	0.00889994	0.667334	NA	NA	NA	NA	NA	NA	NA	NA	NA	12	0.00252151	0.316143
GO:0048666~neuron development	NA	NA	NA	NA	NA	NA	NA	NA	NA	13	0.00893263	0.523133	NA	NA	NA	NA	NA	NA	NA	NA	NA	NA	NA	NA	NA	NA	NA	14	0.0141022	0.97642
GO:0051259~protein oligomerization	NA	NA	NA	NA	NA	NA	NA	NA	NA	15	0.00904351	0.520654	NA	NA	NA	NA	NA	NA	NA	NA	NA	NA	NA	NA	NA	NA	NA	NA	NA	NA
mmu04970:Salivary secretion	NA	NA	NA	NA	NA	NA	NA	NA	NA	15	0.00905841	0.101589	NA	NA	NA	15	0.0187786	0.213469	NA	NA	NA	NA	NA	NA	NA	NA	NA	18	0.00735081	0.0875705
GO:0004972~NMDA glutamate receptor activity	NA	NA	NA	NA	NA	NA	NA	NA	NA	5	0.00931697	0.360092	NA	NA	NA	5	0.0108491	0.496246	NA	NA	NA	NA	NA	NA	NA	NA	NA	5	0.019106	0.747716
GO:0051056~regulation of small GTPase mediated signal transduction	NA	NA	NA	NA	NA	NA	NA	NA	NA	7	0.00974549	0.540555	NA	NA	NA	6	0.0451634	0.924698	NA	NA	NA	NA	NA	NA	NA	NA	NA	NA	NA	NA
GO:0032809~neuronal cell body membrane	NA	NA	NA	NA	NA	NA	NA	NA	NA	9	0.00974796	0.193635	NA	NA	NA	NA	NA	NA	NA	NA	NA	NA	NA	NA	NA	NA	NA	12	0.000618379	0.0264927
GO:0030507~spectrin binding	NA	NA	NA	NA	NA	NA	NA	NA	NA	9	0.0107708	0.380956	NA	NA	NA	9	0.0137853	0.533951	NA	NA	NA	NA	NA	NA	NA	NA	NA	9	0.0269273	0.868825
GO:0008021~synaptic vesicle	NA	NA	NA	NA	NA	NA	NA	NA	NA	24	0.0109671	0.209716	NA	NA	NA	27	0.00169157	0.049522	NA	NA	NA	NA	NA	NA	NA	NA	NA	31	0.000999428	0.0387397
GO:0017124~SH3 domain binding	NA	NA	NA	NA	NA	NA	NA	NA	NA	23	0.011513	0.390512	26	0.00455713	0.799209	NA	NA	NA	NA	NA	NA	NA	NA	NA	25	0.0168083	1	NA	NA	NA
GO:0015631~tubulin binding	NA	NA	NA	NA	NA	NA	NA	NA	NA	12	0.0118885	0.390024	NA	NA	NA	NA	NA	NA	NA	NA	NA	NA	NA	NA	NA	NA	NA	12	0.0463768	1
GO:0006914~autophagy	NA	NA	NA	NA	NA	NA	NA	NA	NA	26	0.0122017	0.60918	NA	NA	NA	30	0.00128556	0.206229	NA	NA	NA	NA	NA	NA	NA	NA	NA	31	0.00752976	0.659067
GO:0043194~axon initial segment	NA	NA	NA	NA	NA	NA	NA	NA	NA	6	0.0123465	0.227238	NA	NA	NA	8	0.00031873	0.0137188	NA	NA	NA	NA	NA	NA	NA	NA	NA	7	0.00545128	0.126781
GO:0005905~clathrin-coated pit	NA	NA	NA	NA	NA	NA	NA	NA	NA	14	0.0125952	0.225783	NA	NA	NA	NA	NA	NA	NA	NA	NA	NA	NA	NA	NA	NA	NA	17	0.00432102	0.10345
GO:0010765~positive regulation of sodium ion transport	NA	NA	NA	NA	NA	NA	NA	NA	NA	8	0.0129384	0.624239	NA	NA	NA	8	0.0155661	0.777375	NA	NA	NA	NA	NA	NA	NA	NA	NA	9	0.0109893	0.822247
GO:0048732~gland development	NA	NA	NA	NA	NA	NA	NA	NA	NA	4	0.0130978	0.622265	NA	NA	NA	4	0.0144655	0.767801	NA	NA	NA	NA	NA	NA	NA	NA	NA	NA	NA	NA
GO:1900454~positive regulation of long term synaptic depression	NA	NA	NA	NA	NA	NA	NA	NA	NA	4	0.0130978	0.622265	NA	NA	NA	4	0.0144655	0.767801	NA	NA	NA	NA	NA	NA	NA	NA	NA	5	0.00179954	0.252972
GO:1900006~positive regulation of dendrite development	NA	NA	NA	NA	NA	NA	NA	NA	NA	7	0.0132057	0.618906	NA	NA	NA	NA	NA	NA	NA	NA	NA	NA	NA	NA	NA	NA	NA	7	0.0329398	1
GO:0031402~sodium ion binding	NA	NA	NA	NA	NA	NA	NA	NA	NA	6	0.0132531	0.413549	NA	NA	NA	7	0.00282142	0.287553	NA	NA	NA	NA	NA	NA	NA	NA	NA	7	0.00640655	0.449108
GO:0043087~regulation of GTPase activity	NA	NA	NA	NA	NA	NA	NA	NA	NA	16	0.0133471	0.616563	NA	NA	NA	NA	NA	NA	NA	NA	NA	NA	NA	NA	NA	NA	NA	NA	NA	NA
GO:0000226~microtubule cytoskeleton organization	NA	NA	NA	NA	NA	NA	NA	NA	NA	18	0.0137474	0.621323	NA	NA	NA	NA	NA	NA	NA	NA	NA	NA	NA	NA	NA	NA	NA	NA	NA	NA
GO:0002087~regulation of respiratory gaseous exchange by neurological system process	NA	NA	NA	NA	NA	NA	NA	NA	NA	5	0.0141786	0.626682	NA	NA	NA	NA	NA	NA	NA	NA	NA	NA	NA	NA	NA	NA	NA	NA	NA	NA
GO:0061337~cardiac conduction	NA	NA	NA	NA	NA	NA	NA	NA	NA	5	0.0141786	0.626682	NA	NA	NA	NA	NA	NA	NA	NA	NA	NA	NA	NA	NA	NA	NA	5	0.0282123	1
GO:0004970~ionotropic glutamate receptor activity	NA	NA	NA	NA	NA	NA	NA	NA	NA	7	0.0145154	0.432545	NA	NA	NA	7	0.0176984	0.569077	NA	NA	NA	NA	NA	NA	NA	NA	NA	8	0.00991393	0.53168
GO:0005234~extracellular-glutamate-gated ion channel activity	NA	NA	NA	NA	NA	NA	NA	NA	NA	7	0.0145154	0.432545	NA	NA	NA	7	0.0176984	0.569077	NA	NA	NA	NA	NA	NA	NA	NA	NA	8	0.00991393	0.53168
GO:0051015~actin filament binding	NA	NA	NA	NA	NA	NA	NA	NA	NA	24	0.014594	0.424445	NA	NA	NA	28	0.00153683	0.201943	NA	NA	NA	NA	NA	NA	NA	NA	NA	30	0.00384692	0.348146
GO:0006874~cellular calcium ion homeostasis	NA	NA	NA	NA	NA	NA	NA	NA	NA	17	0.0162957	0.672209	NA	NA	NA	18	0.0133549	0.756595	NA	NA	NA	NA	NA	NA	NA	NA	NA	19	0.0206131	1
GO:0008016~regulation of heart contraction	NA	NA	NA	NA	NA	NA	NA	NA	NA	8	0.0164742	0.670375	NA	NA	NA	NA	NA	NA	NA	NA	NA	NA	NA	NA	NA	NA	NA	NA	NA	NA
GO:0072661~protein targeting to plasma membrane	NA	NA	NA	NA	NA	NA	NA	NA	NA	8	0.0164742	0.670375	NA	NA	NA	NA	NA	NA	NA	NA	NA	NA	NA	NA	NA	NA	NA	NA	NA	NA
GO:0030182~neuron differentiation	NA	NA	NA	NA	NA	NA	NA	NA	NA	20	0.0169086	0.674214	NA	NA	NA	NA	NA	NA	NA	NA	NA	NA	NA	NA	NA	NA	NA	22	0.0329773	1
GO:0014059~regulation of dopamine secretion	NA	NA	NA	NA	NA	NA	NA	NA	NA	6	0.0171776	0.674365	NA	NA	NA	NA	NA	NA	NA	NA	NA	NA	NA	NA	NA	NA	NA	6	0.0379072	1
GO:1901379~regulation of potassium ion transmembrane transport	NA	NA	NA	NA	NA	NA	NA	NA	NA	6	0.0171776	0.674365	NA	NA	NA	NA	NA	NA	NA	NA	NA	NA	NA	NA	NA	NA	NA	6	0.0379072	1
mmu00562:Inositol phosphate metabolism	NA	NA	NA	NA	NA	NA	NA	NA	NA	15	0.0176248	0.174608	NA	NA	NA	15	0.0393873	0.337088	NA	NA	NA	NA	NA	NA	NA	NA	NA	17	0.0330091	0.266015
GO:0000407~pre-autophagosomal structure	NA	NA	NA	NA	NA	NA	NA	NA	NA	7	0.0176892	0.295907	NA	NA	NA	8	0.00487193	0.112231	NA	NA	NA	NA	NA	NA	NA	NA	NA	NA	NA	NA
GO:0030673~axolemma	NA	NA	NA	NA	NA	NA	NA	NA	NA	7	0.0176892	0.295907	NA	NA	NA	NA	NA	NA	NA	NA	NA	NA	NA	NA	NA	NA	NA	7	0.0409176	0.612994
mmu04919:Thyroid hormone signaling pathway	NA	NA	NA	NA	NA	NA	NA	NA	NA	21	0.0182382	0.173613	NA	NA	NA	NA	NA	NA	NA	NA	NA	NA	NA	NA	NA	NA	NA	NA	NA	NA
GO:0046982~protein heterodimerization activity	NA	NA	NA	NA	NA	NA	NA	NA	NA	68	0.0189984	0.503191	NA	NA	NA	NA	NA	NA	NA	NA	NA	23	0.0353317	0.847331	NA	NA	NA	NA	NA	NA
GO:0048813~dendrite morphogenesis	NA	NA	NA	NA	NA	NA	NA	NA	NA	11	0.0197924	0.720535	NA	NA	NA	NA	NA	NA	NA	NA	NA	NA	NA	NA	NA	NA	NA	NA	NA	NA
GO:0016459~myosin complex	NA	NA	NA	NA	NA	NA	NA	NA	NA	11	0.020188	0.323373	NA	NA	NA	NA	NA	NA	NA	NA	NA	6	0.0105203	0.225344	NA	NA	NA	NA	NA	NA
GO:2001243~negative regulation of intrinsic apoptotic signaling pathway	NA	NA	NA	NA	NA	NA	NA	NA	NA	8	0.0206419	0.730264	NA	NA	NA	NA	NA	NA	NA	NA	NA	NA	NA	NA	NA	NA	NA	NA	NA	NA
GO:0043484~regulation of RNA splicing	NA	NA	NA	NA	NA	NA	NA	NA	NA	8	0.0206419	0.730264	NA	NA	NA	8	0.0246488	0.873577	NA	NA	NA	NA	NA	NA	NA	NA	NA	NA	NA	NA
GO:0040011~locomotion	NA	NA	NA	NA	NA	NA	NA	NA	NA	5	0.0214856	0.739301	NA	NA	NA	6	0.00622906	0.568896	NA	NA	NA	NA	NA	NA	NA	NA	NA	7	0.00198049	0.257067
GO:0006468~protein phosphorylation	NA	NA	NA	NA	NA	NA	NA	NA	NA	77	0.0223976	0.743864	NA	NA	NA	NA	NA	NA	NA	NA	NA	NA	NA	NA	NA	NA	NA	NA	NA	NA
GO:0019226~transmission of nerve impulse	NA	NA	NA	NA	NA	NA	NA	NA	NA	7	0.0225222	0.740868	NA	NA	NA	7	0.0263964	0.872342	NA	NA	NA	NA	NA	NA	NA	NA	NA	8	0.0164749	1
GO:0090630~activation of GTPase activity	NA	NA	NA	NA	NA	NA	NA	NA	NA	15	0.0229768	0.743045	NA	NA	NA	15	0.0301279	0.888858	NA	NA	NA	NA	NA	NA	NA	NA	NA	NA	NA	NA
GO:0050877~neurological system process	NA	NA	NA	NA	NA	NA	NA	NA	NA	6	0.0233495	0.743914	NA	NA	NA	6	0.0268486	0.867601	NA	NA	NA	NA	NA	NA	NA	NA	NA	7	0.0129243	0.9224
GO:0032051~clathrin light chain binding	NA	NA	NA	NA	NA	NA	NA	NA	NA	4	0.0252877	0.59644	NA	NA	NA	NA	NA	NA	NA	NA	NA	NA	NA	NA	NA	NA	NA	NA	NA	NA
GO:0045776~negative regulation of blood pressure	NA	NA	NA	NA	NA	NA	NA	NA	NA	8	0.0254897	0.769755	NA	NA	NA	9	0.00924226	0.670899	NA	NA	NA	NA	NA	NA	NA	NA	NA	NA	NA	NA
GO:0007420~brain development	NA	NA	NA	NA	NA	NA	NA	NA	NA	33	0.0258751	0.770357	NA	NA	NA	NA	NA	NA	10	0.0105851	0.999471	15	0.00526453	0.5018	NA	NA	NA	40	0.0133119	0.935665
GO:0030276~clathrin binding	NA	NA	NA	NA	NA	NA	NA	NA	NA	11	0.0262896	0.600542	NA	NA	NA	NA	NA	NA	NA	NA	NA	NA	NA	NA	NA	NA	NA	NA	NA	NA
GO:0040008~regulation of growth	NA	NA	NA	NA	NA	NA	NA	NA	NA	14	0.0273398	0.780251	NA	NA	NA	NA	NA	NA	NA	NA	NA	NA	NA	NA	NA	NA	NA	NA	NA	NA
GO:0045892~negative regulation of transcription, DNA-templated	NA	NA	NA	NA	NA	NA	NA	NA	NA	64	0.0286443	0.791593	NA	NA	NA	NA	NA	NA	NA	NA	NA	NA	NA	NA	NA	NA	NA	75	0.0379081	1
GO:0005261~cation channel activity	NA	NA	NA	NA	NA	NA	NA	NA	NA	9	0.0299309	0.63883	NA	NA	NA	11	0.00404072	0.317337	NA	NA	NA	NA	NA	NA	NA	NA	NA	12	0.00303604	0.293079
GO:0001078~transcriptional repressor activity, RNA polymerase II core promoter proximal region sequence-specific binding	NA	NA	NA	NA	NA	NA	NA	NA	NA	20	0.0300899	0.630999	NA	NA	NA	NA	NA	NA	NA	NA	NA	NA	NA	NA	NA	NA	NA	NA	NA	NA
GO:0007041~lysosomal transport	NA	NA	NA	NA	NA	NA	NA	NA	NA	5	0.0307124	0.810234	NA	NA	NA	NA	NA	NA	NA	NA	NA	NA	NA	NA	NA	NA	NA	NA	NA	NA
GO:0051932~synaptic transmission, GABAergic	NA	NA	NA	NA	NA	NA	NA	NA	NA	5	0.0307124	0.810234	NA	NA	NA	NA	NA	NA	NA	NA	NA	NA	NA	NA	NA	NA	NA	NA	NA	NA
GO:0034497~protein localization to pre-autophagosomal structure	NA	NA	NA	NA	NA	NA	NA	NA	NA	5	0.0307124	0.810234	NA	NA	NA	5	0.0345062	0.902499	NA	NA	NA	NA	NA	NA	NA	NA	NA	NA	NA	NA
GO:0014902~myotube differentiation	NA	NA	NA	NA	NA	NA	NA	NA	NA	5	0.0307124	0.810234	NA	NA	NA	NA	NA	NA	NA	NA	NA	NA	NA	NA	NA	NA	NA	NA	NA	NA
GO:0034705~potassium channel complex	NA	NA	NA	NA	NA	NA	NA	NA	NA	5	0.0310221	0.436823	NA	NA	NA	6	0.00617928	0.132552	NA	NA	NA	NA	NA	NA	NA	NA	NA	6	0.0121397	0.241017
GO:0035176~social behavior	NA	NA	NA	NA	NA	NA	NA	NA	NA	11	0.0311929	0.811239	NA	NA	NA	NA	NA	NA	NA	NA	NA	NA	NA	NA	NA	NA	NA	13	0.0170206	1
mmu04924:Renin secretion	NA	NA	NA	NA	NA	NA	NA	NA	NA	12	0.031554	0.241799	NA	NA	NA	14	0.011717	0.152112	NA	NA	NA	NA	NA	NA	NA	NA	NA	16	0.00719847	0.0875705
GO:0030218~erythrocyte differentiation	NA	NA	NA	NA	NA	NA	NA	NA	NA	10	0.0319027	0.814515	NA	NA	NA	NA	NA	NA	NA	NA	NA	NA	NA	NA	NA	NA	NA	NA	NA	NA
mmu05217:Basal cell carcinoma	NA	NA	NA	NA	NA	NA	NA	NA	NA	11	0.0337099	0.249111	NA	NA	NA	NA	NA	NA	NA	NA	NA	NA	NA	NA	NA	NA	NA	NA	NA	NA
GO:0046579~positive regulation of Ras protein signal transduction	NA	NA	NA	NA	NA	NA	NA	NA	NA	7	0.0354593	0.836187	NA	NA	NA	7	0.0412585	0.919668	NA	NA	NA	NA	NA	NA	NA	NA	NA	8	0.0280923	1
GO:0051968~positive regulation of synaptic transmission, glutamatergic	NA	NA	NA	NA	NA	NA	NA	NA	NA	7	0.0354593	0.836187	NA	NA	NA	NA	NA	NA	NA	NA	NA	NA	NA	NA	NA	NA	NA	8	0.0280923	1
GO:0007205~protein kinase C-activating G-protein coupled receptor signaling pathway	NA	NA	NA	NA	NA	NA	NA	NA	NA	7	0.0354593	0.836187	NA	NA	NA	8	0.012055	0.729239	NA	NA	NA	NA	NA	NA	NA	NA	NA	9	0.00816481	0.688665
GO:0007519~skeletal muscle tissue development	NA	NA	NA	NA	NA	NA	NA	NA	NA	11	0.0358513	0.835998	NA	NA	NA	NA	NA	NA	NA	NA	NA	NA	NA	NA	NA	NA	NA	NA	NA	NA
GO:0071277~cellular response to calcium ion	NA	NA	NA	NA	NA	NA	NA	NA	NA	11	0.0358513	0.835998	NA	NA	NA	NA	NA	NA	NA	NA	NA	NA	NA	NA	NA	NA	NA	NA	NA	NA
GO:0032839~dendrite cytoplasm	NA	NA	NA	NA	NA	NA	NA	NA	NA	7	0.0359292	0.478366	NA	NA	NA	NA	NA	NA	NA	NA	NA	NA	NA	NA	NA	NA	NA	10	0.00187132	0.0585867
GO:0030155~regulation of cell adhesion	NA	NA	NA	NA	NA	NA	NA	NA	NA	10	0.0370665	0.842539	NA	NA	NA	NA	NA	NA	NA	NA	NA	5	0.0432761	0.863417	NA	NA	NA	NA	NA	NA
GO:0007416~synapse assembly	NA	NA	NA	NA	NA	NA	NA	NA	NA	10	0.0370665	0.842539	NA	NA	NA	NA	NA	NA	NA	NA	NA	5	0.0432761	0.863417	NA	NA	NA	NA	NA	NA
GO:0015991~ATP hydrolysis coupled proton transport	NA	NA	NA	NA	NA	NA	NA	NA	NA	8	0.0373927	0.841773	NA	NA	NA	NA	NA	NA	NA	NA	NA	NA	NA	NA	NA	NA	NA	NA	NA	NA
GO:0072178~nephric duct morphogenesis	NA	NA	NA	NA	NA	NA	NA	NA	NA	3	0.0374187	0.838631	NA	NA	NA	NA	NA	NA	NA	NA	NA	NA	NA	NA	NA	NA	NA	NA	NA	NA
mmu04740:Olfactory transduction	NA	NA	NA	NA	NA	NA	NA	NA	NA	7	0.0378743	0.268385	NA	NA	NA	NA	NA	NA	NA	NA	NA	NA	NA	NA	NA	NA	NA	NA	NA	NA
GO:0031226~intrinsic component of plasma membrane	NA	NA	NA	NA	NA	NA	NA	NA	NA	8	0.0379393	0.489269	NA	NA	NA	NA	NA	NA	NA	NA	NA	NA	NA	NA	NA	NA	NA	NA	NA	NA
GO:0042297~vocal learning	NA	NA	NA	NA	NA	NA	NA	NA	NA	4	0.0383233	0.842453	NA	NA	NA	NA	NA	NA	NA	NA	NA	NA	NA	NA	NA	NA	NA	NA	NA	NA
GO:0014050~negative regulation of glutamate secretion	NA	NA	NA	NA	NA	NA	NA	NA	NA	4	0.0383233	0.842453	NA	NA	NA	NA	NA	NA	NA	NA	NA	NA	NA	NA	NA	NA	NA	NA	NA	NA
GO:0042312~regulation of vasodilation	NA	NA	NA	NA	NA	NA	NA	NA	NA	4	0.0383233	0.842453	NA	NA	NA	NA	NA	NA	NA	NA	NA	NA	NA	NA	NA	NA	NA	NA	NA	NA
GO:0046961~proton-transporting ATPase activity, rotational mechanism	NA	NA	NA	NA	NA	NA	NA	NA	NA	7	0.0386568	0.7054	NA	NA	NA	NA	NA	NA	NA	NA	NA	NA	NA	NA	NA	NA	NA	NA	NA	NA
GO:0004719~protein-L-isoaspartate (D-aspartate) O-methyltransferase activity	NA	NA	NA	NA	NA	NA	NA	NA	NA	3	0.0388886	0.698693	NA	NA	NA	3	0.0421832	0.776225	NA	NA	NA	NA	NA	NA	NA	NA	NA	NA	NA	NA
GO:0001666~response to hypoxia	NA	NA	NA	NA	NA	NA	NA	NA	NA	28	0.0390446	0.84473	NA	NA	NA	NA	NA	NA	NA	NA	NA	NA	NA	NA	NA	NA	NA	NA	NA	NA
mmu04730:Long-term depression	NA	NA	NA	NA	NA	NA	NA	NA	NA	12	0.0403377	0.276136	NA	NA	NA	13	0.0363538	0.325653	NA	NA	NA	NA	NA	NA	NA	NA	NA	14	0.043674	0.332408
GO:0047372~acylglycerol lipase activity	NA	NA	NA	NA	NA	NA	NA	NA	NA	4	0.0403994	0.704033	NA	NA	NA	NA	NA	NA	NA	NA	NA	NA	NA	NA	NA	NA	NA	NA	NA	NA
GO:0032922~circadian regulation of gene expression	NA	NA	NA	NA	NA	NA	NA	NA	NA	13	0.0412457	0.854417	NA	NA	NA	15	0.0105278	0.689431	NA	NA	NA	NA	NA	NA	NA	NA	NA	19	0.00123602	0.190236
GO:0014704~intercalated disc	NA	NA	NA	NA	NA	NA	NA	NA	NA	11	0.041719	0.514935	NA	NA	NA	13	0.00820377	0.167715	NA	NA	NA	NA	NA	NA	NA	NA	NA	13	0.0264949	0.440139
GO:0018105~peptidyl-serine phosphorylation	NA	NA	NA	NA	NA	NA	NA	NA	NA	23	0.0417221	0.851663	NA	NA	NA	NA	NA	NA	NA	NA	NA	NA	NA	NA	NA	NA	NA	NA	NA	NA
GO:0005245~voltage-gated calcium channel activity	NA	NA	NA	NA	NA	NA	NA	NA	NA	9	0.0418094	0.708174	NA	NA	NA	12	0.00191087	0.223126	NA	NA	NA	NA	NA	NA	NA	NA	NA	12	0.00677679	0.449108
GO:0033555~multicellular organismal response to stress	NA	NA	NA	NA	NA	NA	NA	NA	NA	5	0.0419263	0.850075	NA	NA	NA	5	0.0469442	0.927385	NA	NA	NA	NA	NA	NA	NA	NA	NA	NA	NA	NA
GO:0030141~secretory granule	NA	NA	NA	NA	NA	NA	NA	NA	NA	16	0.0419755	0.509259	NA	NA	NA	NA	NA	NA	NA	NA	NA	NA	NA	NA	NA	NA	NA	21	0.00649958	0.146963
GO:0043547~positive regulation of GTPase activity	NA	NA	NA	NA	NA	NA	NA	NA	NA	21	0.0422891	0.8496	NA	NA	NA	22	0.0392124	0.91477	NA	NA	NA	9	0.0400052	0.860775	NA	NA	NA	28	0.00507622	0.523302
GO:0001518~voltage-gated sodium channel complex	NA	NA	NA	NA	NA	NA	NA	NA	NA	5	0.0423366	0.504648	NA	NA	NA	6	0.0140113	0.240544	NA	NA	NA	NA	NA	NA	NA	NA	NA	6	0.0184332	0.333436
GO:0030506~ankyrin binding	NA	NA	NA	NA	NA	NA	NA	NA	NA	6	0.0426605	0.707312	NA	NA	NA	6	0.0499622	0.800277	NA	NA	NA	NA	NA	NA	NA	NA	NA	NA	NA	NA
GO:0005891~voltage-gated calcium channel complex	NA	NA	NA	NA	NA	NA	NA	NA	NA	7	0.0439692	0.510641	NA	NA	NA	10	0.000867281	0.0302941	NA	NA	NA	NA	NA	NA	NA	NA	NA	10	0.00269445	0.0731095
GO:0005546~phosphatidylinositol-4,5-bisphosphate binding	NA	NA	NA	NA	NA	NA	NA	NA	NA	12	0.0440964	0.711398	NA	NA	NA	NA	NA	NA	NA	NA	NA	NA	NA	NA	NA	NA	NA	NA	NA	NA
GO:0016595~glutamate binding	NA	NA	NA	NA	NA	NA	NA	NA	NA	5	0.0447148	0.708623	NA	NA	NA	NA	NA	NA	NA	NA	NA	NA	NA	NA	NA	NA	NA	6	0.0210068	0.779943
mmu04750:Inflammatory mediator regulation of TRP channels	NA	NA	NA	NA	NA	NA	NA	NA	NA	16	0.0465893	0.297458	NA	NA	NA	17	0.0497393	0.384106	NA	NA	NA	NA	NA	NA	NA	NA	NA	20	0.0280538	0.240211
GO:0042493~response to drug	NA	NA	NA	NA	NA	NA	NA	NA	NA	41	0.0477526	0.877729	NA	NA	NA	NA	NA	NA	NA	NA	NA	NA	NA	NA	NA	NA	NA	49	0.0383713	1
GO:0019888~protein phosphatase regulator activity	NA	NA	NA	NA	NA	NA	NA	NA	NA	8	0.0488469	0.733203	NA	NA	NA	9	0.0172562	0.586761	NA	NA	NA	NA	NA	NA	NA	NA	NA	9	0.0498542	1
GO:0000045~autophagosome assembly	NA	NA	NA	NA	NA	NA	NA	NA	NA	10	0.04904	0.882086	NA	NA	NA	NA	NA	NA	NA	NA	NA	NA	NA	NA	NA	NA	NA	NA	NA	NA
GO:0043401~steroid hormone mediated signaling pathway	NA	NA	NA	NA	NA	NA	NA	NA	NA	10	0.04904	0.882086	NA	NA	NA	NA	NA	NA	NA	NA	NA	NA	NA	NA	NA	NA	NA	NA	NA	NA
GO:2000311~regulation of alpha-amino-3-hydroxy-5-methyl-4-isoxazole propionate selective glutamate receptor activity	NA	NA	NA	NA	NA	NA	NA	NA	NA	6	0.0496924	0.882968	NA	NA	NA	NA	NA	NA	NA	NA	NA	NA	NA	NA	NA	NA	NA	NA	NA	NA
mmu04310:Wnt signaling pathway	NA	NA	NA	NA	NA	NA	NA	NA	NA	21	0.0497255	0.307155	NA	NA	NA	NA	NA	NA	NA	NA	NA	NA	NA	NA	NA	NA	NA	28	0.0126727	0.137368
GO:0042803~protein homodimerization activity	NA	NA	NA	NA	NA	NA	NA	NA	NA	95	0.0498911	0.73343	NA	NA	NA	NA	NA	NA	NA	NA	NA	NA	NA	NA	NA	NA	NA	NA	NA	NA
GO:0007264~small GTPase mediated signal transduction	NA	NA	NA	NA	NA	NA	NA	NA	NA	NA	NA	NA	47	0.000806041	0.685952	NA	NA	NA	NA	NA	NA	NA	NA	NA	44	0.0095208	1	NA	NA	NA
GO:0045177~apical part of cell	NA	NA	NA	NA	NA	NA	NA	NA	NA	NA	NA	NA	25	0.00298412	0.389279	NA	NA	NA	NA	NA	NA	NA	NA	NA	NA	NA	NA	NA	NA	NA
GO:0006814~sodium ion transport	NA	NA	NA	NA	NA	NA	NA	NA	NA	NA	NA	NA	22	0.00333201	0.909003	NA	NA	NA	NA	NA	NA	NA	NA	NA	NA	NA	NA	NA	NA	NA
GO:0021785~branchiomotor neuron axon guidance	NA	NA	NA	NA	NA	NA	NA	NA	NA	NA	NA	NA	6	0.00919985	0.988027	NA	NA	NA	NA	NA	NA	NA	NA	NA	NA	NA	NA	NA	NA	NA
GO:0005089~Rho guanyl-nucleotide exchange factor activity	NA	NA	NA	NA	NA	NA	NA	NA	NA	NA	NA	NA	18	0.0109334	0.923934	NA	NA	NA	NA	NA	NA	NA	NA	NA	18	0.0164356	1	NA	NA	NA
GO:0032525~somite rostral/caudal axis specification	NA	NA	NA	NA	NA	NA	NA	NA	NA	NA	NA	NA	5	0.0135786	0.985123	NA	NA	NA	NA	NA	NA	NA	NA	NA	NA	NA	NA	NA	NA	NA
GO:0005911~cell-cell junction	NA	NA	NA	NA	NA	NA	NA	NA	NA	NA	NA	NA	35	0.0157376	0.687538	NA	NA	NA	NA	NA	NA	NA	NA	NA	40	0.00264353	0.630042	NA	NA	NA
GO:0035023~regulation of Rho protein signal transduction	NA	NA	NA	NA	NA	NA	NA	NA	NA	NA	NA	NA	18	0.016481	0.991553	NA	NA	NA	NA	NA	NA	NA	NA	NA	18	0.0243226	1	NA	NA	NA
GO:0050291~sphingosine N-acyltransferase activity	NA	NA	NA	NA	NA	NA	NA	NA	NA	NA	NA	NA	4	0.0185781	0.962962	NA	NA	NA	NA	NA	NA	NA	NA	NA	4	0.0209626	1	NA	NA	NA
GO:0005070~SH3/SH2 adaptor activity	NA	NA	NA	NA	NA	NA	NA	NA	NA	NA	NA	NA	8	0.0192319	0.951864	NA	NA	NA	NA	NA	NA	NA	NA	NA	NA	NA	NA	NA	NA	NA
GO:0017154~semaphorin receptor activity	NA	NA	NA	NA	NA	NA	NA	NA	NA	NA	NA	NA	6	0.0203678	0.944606	NA	NA	NA	NA	NA	NA	NA	NA	NA	NA	NA	NA	NA	NA	NA
GO:0032421~stereocilium bundle	NA	NA	NA	NA	NA	NA	NA	NA	NA	NA	NA	NA	5	0.0218671	0.767588	NA	NA	NA	NA	NA	NA	NA	NA	NA	NA	NA	NA	NA	NA	NA
GO:0051219~phosphoprotein binding	NA	NA	NA	NA	NA	NA	NA	NA	NA	NA	NA	NA	13	0.0226618	0.946598	NA	NA	NA	NA	NA	NA	NA	NA	NA	13	0.0307564	1	NA	NA	NA
GO:0019221~cytokine-mediated signaling pathway	NA	NA	NA	NA	NA	NA	NA	NA	NA	NA	NA	NA	19	0.0240399	0.997904	NA	NA	NA	NA	NA	NA	NA	NA	NA	NA	NA	NA	NA	NA	NA
GO:0042981~regulation of apoptotic process	NA	NA	NA	NA	NA	NA	NA	NA	NA	NA	NA	NA	31	0.0241726	0.997142	NA	NA	NA	NA	NA	NA	NA	NA	NA	NA	NA	NA	NA	NA	NA
GO:0032420~stereocilium	NA	NA	NA	NA	NA	NA	NA	NA	NA	NA	NA	NA	9	0.0244191	0.688225	NA	NA	NA	NA	NA	NA	NA	NA	NA	9	0.0329944	1	NA	NA	NA
GO:0046513~ceramide biosynthetic process	NA	NA	NA	NA	NA	NA	NA	NA	NA	NA	NA	NA	8	0.0246867	0.996548	NA	NA	NA	NA	NA	NA	NA	NA	NA	8	0.0240767	1	NA	NA	NA
GO:0005622~intracellular	NA	NA	NA	NA	NA	NA	NA	NA	NA	NA	NA	NA	201	0.0254018	0.654015	NA	NA	NA	NA	NA	NA	NA	NA	NA	212	0.0209978	1	NA	NA	NA
mmu04514:Cell adhesion molecules (CAMs)	NA	NA	NA	NA	NA	NA	NA	NA	NA	NA	NA	NA	21	0.02776	0.673087	NA	NA	NA	NA	NA	NA	NA	NA	NA	NA	NA	NA	NA	NA	NA
mmu05321:Inflammatory bowel disease (IBD)	NA	NA	NA	NA	NA	NA	NA	NA	NA	NA	NA	NA	10	0.029152	0.642311	NA	NA	NA	NA	NA	NA	NA	NA	NA	NA	NA	NA	NA	NA	NA
GO:0007286~spermatid development	NA	NA	NA	NA	NA	NA	NA	NA	NA	NA	NA	NA	16	0.029396	0.997806	NA	NA	NA	NA	NA	NA	NA	NA	NA	NA	NA	NA	NA	NA	NA
GO:0006821~chloride transport	NA	NA	NA	NA	NA	NA	NA	NA	NA	NA	NA	NA	14	0.0318524	0.997008	NA	NA	NA	NA	NA	NA	NA	NA	NA	NA	NA	NA	NA	NA	NA
GO:0016671~oxidoreductase activity, acting on a sulfur group of donors, disulfide as acceptor	NA	NA	NA	NA	NA	NA	NA	NA	NA	NA	NA	NA	5	0.0326929	0.972538	NA	NA	NA	NA	NA	NA	NA	NA	NA	5	0.0377341	1	NA	NA	NA
GO:0005391~sodium:potassium-exchanging ATPase activity	NA	NA	NA	NA	NA	NA	NA	NA	NA	NA	NA	NA	5	0.0326929	0.972538	NA	NA	NA	NA	NA	NA	NA	NA	NA	NA	NA	NA	NA	NA	NA
GO:0070852~cell body fiber	NA	NA	NA	NA	NA	NA	NA	NA	NA	NA	NA	NA	5	0.0327075	0.704571	NA	NA	NA	NA	NA	NA	NA	NA	NA	NA	NA	NA	NA	NA	NA
GO:0048846~axon extension involved in axon guidance	NA	NA	NA	NA	NA	NA	NA	NA	NA	NA	NA	NA	5	0.0327837	0.996802	NA	NA	NA	NA	NA	NA	NA	NA	NA	NA	NA	NA	NA	NA	NA
GO:0030007~cellular potassium ion homeostasis	NA	NA	NA	NA	NA	NA	NA	NA	NA	NA	NA	NA	5	0.0327837	0.996802	NA	NA	NA	NA	NA	NA	NA	NA	NA	NA	NA	NA	NA	NA	NA
GO:0097485~neuron projection guidance	NA	NA	NA	NA	NA	NA	NA	NA	NA	NA	NA	NA	4	0.0336181	0.996543	NA	NA	NA	NA	NA	NA	NA	NA	NA	4	0.0377423	1	NA	NA	NA
GO:0045121~membrane raft	NA	NA	NA	NA	NA	NA	NA	NA	NA	NA	NA	NA	41	0.0346658	0.68785	NA	NA	NA	NA	NA	NA	17	0.0036744	0.187283	42	0.0468558	1	NA	NA	NA
GO:0005856~cytoskeleton	NA	NA	NA	NA	NA	NA	NA	NA	NA	NA	NA	NA	156	0.0359122	0.683185	NA	NA	NA	NA	NA	NA	NA	NA	NA	NA	NA	NA	NA	NA	NA
GO:0051393~alpha-actinin binding	NA	NA	NA	NA	NA	NA	NA	NA	NA	NA	NA	NA	6	0.0379831	0.979533	NA	NA	NA	NA	NA	NA	NA	NA	NA	NA	NA	NA	NA	NA	NA
GO:0016810~hydrolase activity, acting on carbon-nitrogen (but not peptide) bonds	NA	NA	NA	NA	NA	NA	NA	NA	NA	NA	NA	NA	6	0.0379831	0.979533	NA	NA	NA	NA	NA	NA	NA	NA	NA	NA	NA	NA	NA	NA	NA
GO:0005640~nuclear outer membrane	NA	NA	NA	NA	NA	NA	NA	NA	NA	NA	NA	NA	7	0.0391071	0.697831	NA	NA	NA	NA	NA	NA	NA	NA	NA	NA	NA	NA	NA	NA	NA
GO:0005912~adherens junction	NA	NA	NA	NA	NA	NA	NA	NA	NA	NA	NA	NA	13	0.0401053	0.691045	NA	NA	NA	NA	NA	NA	NA	NA	NA	14	0.0272689	1	NA	NA	NA
GO:0005901~caveola	NA	NA	NA	NA	NA	NA	NA	NA	NA	NA	NA	NA	18	0.0409725	0.683515	NA	NA	NA	NA	NA	NA	NA	NA	NA	NA	NA	NA	NA	NA	NA
mmu04722:Neurotrophin signaling pathway	NA	NA	NA	NA	NA	NA	NA	NA	NA	NA	NA	NA	22	0.0413382	0.690758	NA	NA	NA	NA	NA	NA	NA	NA	NA	NA	NA	NA	NA	NA	NA
GO:0060048~cardiac muscle contraction	NA	NA	NA	NA	NA	NA	NA	NA	NA	NA	NA	NA	11	0.0429202	0.999089	NA	NA	NA	NA	NA	NA	NA	NA	NA	NA	NA	NA	NA	NA	NA
GO:0005834~heterotrimeric G-protein complex	NA	NA	NA	NA	NA	NA	NA	NA	NA	NA	NA	NA	9	0.0434239	0.690261	NA	NA	NA	NA	NA	NA	NA	NA	NA	NA	NA	NA	NA	NA	NA
GO:0005525~GTP binding	NA	NA	NA	NA	NA	NA	NA	NA	NA	NA	NA	NA	56	0.0436681	0.980231	NA	NA	NA	NA	NA	NA	NA	NA	NA	NA	NA	NA	NA	NA	NA
GO:0015279~store-operated calcium channel activity	NA	NA	NA	NA	NA	NA	NA	NA	NA	NA	NA	NA	5	0.0461366	0.979891	NA	NA	NA	NA	NA	NA	NA	NA	NA	NA	NA	NA	NA	NA	NA
GO:0051213~dioxygenase activity	NA	NA	NA	NA	NA	NA	NA	NA	NA	NA	NA	NA	16	0.0461509	0.975046	NA	NA	NA	NA	NA	NA	NA	NA	NA	NA	NA	NA	NA	NA	NA
GO:0045176~apical protein localization	NA	NA	NA	NA	NA	NA	NA	NA	NA	NA	NA	NA	5	0.0462602	0.99889	NA	NA	NA	NA	NA	NA	NA	NA	NA	NA	NA	NA	NA	NA	NA
GO:2001223~negative regulation of neuron migration	NA	NA	NA	NA	NA	NA	NA	NA	NA	NA	NA	NA	5	0.0462602	0.99889	NA	NA	NA	NA	NA	NA	NA	NA	NA	6	0.00679997	1	NA	NA	NA
GO:0048485~sympathetic nervous system development	NA	NA	NA	NA	NA	NA	NA	NA	NA	NA	NA	NA	5	0.0462602	0.99889	NA	NA	NA	NA	NA	NA	NA	NA	NA	NA	NA	NA	NA	NA	NA
GO:0001725~stress fiber	NA	NA	NA	NA	NA	NA	NA	NA	NA	NA	NA	NA	15	0.0463622	0.700321	NA	NA	NA	NA	NA	NA	NA	NA	NA	NA	NA	NA	NA	NA	NA
GO:0016126~sterol biosynthetic process	NA	NA	NA	NA	NA	NA	NA	NA	NA	NA	NA	NA	8	0.0466505	0.998694	NA	NA	NA	NA	NA	NA	5	0.0101699	0.636498	NA	NA	NA	NA	NA	NA
GO:0034648~histone demethylase activity (H3-dimethyl-K4 specific)	NA	NA	NA	NA	NA	NA	NA	NA	NA	NA	NA	NA	3	0.0475042	0.972719	NA	NA	NA	NA	NA	NA	NA	NA	NA	NA	NA	NA	NA	NA	NA
GO:0042271~susceptibility to natural killer cell mediated cytotoxicity	NA	NA	NA	NA	NA	NA	NA	NA	NA	NA	NA	NA	3	0.0475787	0.99859	NA	NA	NA	NA	NA	NA	NA	NA	NA	NA	NA	NA	NA	NA	NA
GO:0032513~negative regulation of protein phosphatase type 2B activity	NA	NA	NA	NA	NA	NA	NA	NA	NA	NA	NA	NA	3	0.0475787	0.99859	NA	NA	NA	NA	NA	NA	NA	NA	NA	NA	NA	NA	NA	NA	NA
GO:0098703~calcium ion import across plasma membrane	NA	NA	NA	NA	NA	NA	NA	NA	NA	NA	NA	NA	3	0.0475787	0.99859	NA	NA	NA	NA	NA	NA	NA	NA	NA	NA	NA	NA	NA	NA	NA
mmu05012:Parkinson's disease	NA	NA	NA	NA	NA	NA	NA	NA	NA	NA	NA	NA	NA	NA	NA	32	0.000406734	0.0153401	NA	NA	NA	NA	NA	NA	NA	NA	NA	30	0.017004	0.166397
GO:0044224~juxtaparanode region of axon	NA	NA	NA	NA	NA	NA	NA	NA	NA	NA	NA	NA	NA	NA	NA	6	0.00373806	0.0927813	NA	NA	NA	NA	NA	NA	NA	NA	NA	6	0.00747994	0.160228
GO:0007628~adult walking behavior	NA	NA	NA	NA	NA	NA	NA	NA	NA	NA	NA	NA	NA	NA	NA	12	0.00408626	0.455783	NA	NA	NA	NA	NA	NA	NA	NA	NA	13	0.00491143	0.517821
mmu04260:Cardiac muscle contraction	NA	NA	NA	NA	NA	NA	NA	NA	NA	NA	NA	NA	NA	NA	NA	18	0.00473908	0.0716338	NA	NA	NA	NA	NA	NA	NA	NA	NA	NA	NA	NA
GO:0007163~establishment or maintenance of cell polarity	NA	NA	NA	NA	NA	NA	NA	NA	NA	NA	NA	NA	NA	NA	NA	9	0.00541581	0.541596	NA	NA	NA	NA	NA	NA	NA	NA	NA	8	0.0442634	1
GO:0000209~protein polyubiquitination	NA	NA	NA	NA	NA	NA	NA	NA	NA	NA	NA	NA	NA	NA	NA	22	0.00581213	0.55525	NA	NA	NA	NA	NA	NA	NA	NA	NA	22	0.0364526	1
GO:0005743~mitochondrial inner membrane	NA	NA	NA	NA	NA	NA	NA	NA	NA	NA	NA	NA	NA	NA	NA	60	0.00599748	0.13254	NA	NA	NA	NA	NA	NA	NA	NA	NA	NA	NA	NA
GO:0043280~positive regulation of cysteine-type endopeptidase activity involved in apoptotic process	NA	NA	NA	NA	NA	NA	NA	NA	NA	NA	NA	NA	NA	NA	NA	12	0.00926199	0.661649	NA	NA	NA	NA	NA	NA	NA	NA	NA	NA	NA	NA
GO:0004842~ubiquitin-protein transferase activity	NA	NA	NA	NA	NA	NA	NA	NA	NA	NA	NA	NA	NA	NA	NA	53	0.00926794	0.476323	NA	NA	NA	NA	NA	NA	NA	NA	NA	57	0.0322149	0.951985
GO:0043691~reverse cholesterol transport	NA	NA	NA	NA	NA	NA	NA	NA	NA	NA	NA	NA	NA	NA	NA	5	0.00984146	0.674208	NA	NA	NA	NA	NA	NA	NA	NA	NA	NA	NA	NA
GO:0006020~inositol metabolic process	NA	NA	NA	NA	NA	NA	NA	NA	NA	NA	NA	NA	NA	NA	NA	5	0.00984146	0.674208	NA	NA	NA	NA	NA	NA	NA	NA	NA	NA	NA	NA
GO:0005198~structural molecule activity	NA	NA	NA	NA	NA	NA	NA	NA	NA	NA	NA	NA	NA	NA	NA	20	0.0103026	0.495151	NA	NA	NA	NA	NA	NA	NA	NA	NA	NA	NA	NA
GO:0000139~Golgi membrane	NA	NA	NA	NA	NA	NA	NA	NA	NA	NA	NA	NA	NA	NA	NA	62	0.0116308	0.218569	NA	NA	NA	NA	NA	NA	NA	NA	NA	71	0.00983295	0.202857
mmu04530:Tight junction	NA	NA	NA	NA	NA	NA	NA	NA	NA	NA	NA	NA	NA	NA	NA	16	0.0125547	0.154676	NA	NA	NA	NA	NA	NA	NA	NA	NA	NA	NA	NA
GO:0044297~cell body	NA	NA	NA	NA	NA	NA	NA	NA	NA	NA	NA	NA	NA	NA	NA	20	0.0137774	0.242298	NA	NA	NA	NA	NA	NA	NA	NA	NA	NA	NA	NA
GO:0048787~presynaptic active zone membrane	NA	NA	NA	NA	NA	NA	NA	NA	NA	NA	NA	NA	NA	NA	NA	4	0.0143897	0.240992	NA	NA	NA	NA	NA	NA	NA	NA	NA	4	0.0223139	0.386458
GO:0034375~high-density lipoprotein particle remodeling	NA	NA	NA	NA	NA	NA	NA	NA	NA	NA	NA	NA	NA	NA	NA	5	0.0160417	0.780164	NA	NA	NA	NA	NA	NA	NA	NA	NA	NA	NA	NA
GO:0042165~neurotransmitter binding	NA	NA	NA	NA	NA	NA	NA	NA	NA	NA	NA	NA	NA	NA	NA	5	0.0176343	0.58097	NA	NA	NA	NA	NA	NA	NA	NA	NA	NA	NA	NA
GO:0005248~voltage-gated sodium channel activity	NA	NA	NA	NA	NA	NA	NA	NA	NA	NA	NA	NA	NA	NA	NA	7	0.0176984	0.569077	NA	NA	NA	NA	NA	NA	NA	NA	NA	7	0.0276008	0.868825
GO:0034220~ion transmembrane transport	NA	NA	NA	NA	NA	NA	NA	NA	NA	NA	NA	NA	NA	NA	NA	9	0.018317	0.816381	NA	NA	NA	NA	NA	NA	NA	NA	NA	9	0.0443347	1
GO:0016236~macroautophagy	NA	NA	NA	NA	NA	NA	NA	NA	NA	NA	NA	NA	NA	NA	NA	8	0.0197457	0.833094	NA	NA	NA	NA	NA	NA	NA	NA	NA	8	0.0442634	1
GO:0009117~nucleotide metabolic process	NA	NA	NA	NA	NA	NA	NA	NA	NA	NA	NA	NA	NA	NA	NA	8	0.0197457	0.833094	NA	NA	NA	NA	NA	NA	NA	NA	NA	9	0.0109893	0.822247
GO:0035327~transcriptionally active chromatin	NA	NA	NA	NA	NA	NA	NA	NA	NA	NA	NA	NA	NA	NA	NA	7	0.0203445	0.311228	NA	NA	NA	NA	NA	NA	NA	NA	NA	NA	NA	NA
GO:0015813~L-glutamate transport	NA	NA	NA	NA	NA	NA	NA	NA	NA	NA	NA	NA	NA	NA	NA	5	0.0242236	0.874048	NA	NA	NA	NA	NA	NA	NA	NA	NA	5	0.0418355	1
GO:0043161~proteasome-mediated ubiquitin-dependent protein catabolic process	NA	NA	NA	NA	NA	NA	NA	NA	NA	NA	NA	NA	NA	NA	NA	25	0.0252237	0.874699	NA	NA	NA	NA	NA	NA	NA	NA	NA	30	0.00997892	0.798142
GO:0097114~NMDA glutamate receptor clustering	NA	NA	NA	NA	NA	NA	NA	NA	NA	NA	NA	NA	NA	NA	NA	4	0.0263555	0.876625	NA	NA	NA	NA	NA	NA	NA	NA	NA	NA	NA	NA
GO:0050905~neuromuscular process	NA	NA	NA	NA	NA	NA	NA	NA	NA	NA	NA	NA	NA	NA	NA	7	0.0263964	0.872342	NA	NA	NA	NA	NA	NA	NA	NA	NA	8	0.0164749	1
GO:0016567~protein ubiquitination	NA	NA	NA	NA	NA	NA	NA	NA	NA	NA	NA	NA	NA	NA	NA	53	0.0265047	0.868755	NA	NA	NA	NA	NA	NA	NA	NA	NA	NA	NA	NA
GO:0008331~high voltage-gated calcium channel activity	NA	NA	NA	NA	NA	NA	NA	NA	NA	NA	NA	NA	NA	NA	NA	5	0.0265543	0.694003	NA	NA	NA	NA	NA	NA	NA	NA	NA	5	0.0450859	1
GO:0033270~paranode region of axon	NA	NA	NA	NA	NA	NA	NA	NA	NA	NA	NA	NA	NA	NA	NA	6	0.0266536	0.380539	NA	NA	NA	NA	NA	NA	NA	NA	NA	NA	NA	NA
GO:0042752~regulation of circadian rhythm	NA	NA	NA	NA	NA	NA	NA	NA	NA	NA	NA	NA	NA	NA	NA	12	0.0288339	0.881969	NA	NA	NA	NA	NA	NA	NA	NA	NA	18	0.000255429	0.0658297
GO:0043278~response to morphine	NA	NA	NA	NA	NA	NA	NA	NA	NA	NA	NA	NA	NA	NA	NA	8	0.0303248	0.886424	NA	NA	NA	NA	NA	NA	NA	NA	NA	9	0.0237313	1
GO:2000463~positive regulation of excitatory postsynaptic potential	NA	NA	NA	NA	NA	NA	NA	NA	NA	NA	NA	NA	NA	NA	NA	8	0.0303248	0.886424	NA	NA	NA	NA	NA	NA	NA	NA	NA	10	0.00737043	0.657527
mmu03015:mRNA surveillance pathway	NA	NA	NA	NA	NA	NA	NA	NA	NA	NA	NA	NA	NA	NA	NA	18	0.0321193	0.31447	NA	NA	NA	NA	NA	NA	NA	NA	NA	NA	NA	NA
GO:0045732~positive regulation of protein catabolic process	NA	NA	NA	NA	NA	NA	NA	NA	NA	NA	NA	NA	NA	NA	NA	13	0.032304	0.89794	NA	NA	NA	NA	NA	NA	NA	NA	NA	14	0.0471097	1
GO:0051536~iron-sulfur cluster binding	NA	NA	NA	NA	NA	NA	NA	NA	NA	NA	NA	NA	NA	NA	NA	14	0.0336705	0.767393	NA	NA	NA	NA	NA	NA	NA	NA	NA	NA	NA	NA
mmu04932:Non-alcoholic fatty liver disease (NAFLD)	NA	NA	NA	NA	NA	NA	NA	NA	NA	NA	NA	NA	NA	NA	NA	26	0.034476	0.322165	NA	NA	NA	NA	NA	NA	NA	NA	NA	NA	NA	NA
GO:0002031~G-protein coupled receptor internalization	NA	NA	NA	NA	NA	NA	NA	NA	NA	NA	NA	NA	NA	NA	NA	5	0.0345062	0.902499	NA	NA	NA	NA	NA	NA	NA	NA	NA	NA	NA	NA
GO:0090129~positive regulation of synapse maturation	NA	NA	NA	NA	NA	NA	NA	NA	NA	NA	NA	NA	NA	NA	NA	5	0.0345062	0.902499	NA	NA	NA	NA	NA	NA	NA	NA	NA	6	0.0126083	0.913907
GO:0090303~positive regulation of wound healing	NA	NA	NA	NA	NA	NA	NA	NA	NA	NA	NA	NA	NA	NA	NA	5	0.0345062	0.902499	NA	NA	NA	NA	NA	NA	NA	NA	NA	NA	NA	NA
GO:0008631~intrinsic apoptotic signaling pathway in response to oxidative stress	NA	NA	NA	NA	NA	NA	NA	NA	NA	NA	NA	NA	NA	NA	NA	6	0.035277	0.90413	NA	NA	NA	NA	NA	NA	NA	NA	NA	NA	NA	NA
GO:0005246~calcium channel regulator activity	NA	NA	NA	NA	NA	NA	NA	NA	NA	NA	NA	NA	NA	NA	NA	7	0.0374632	0.782883	NA	NA	NA	NA	NA	NA	NA	NA	NA	9	0.00682346	0.449108
GO:0051028~mRNA transport	NA	NA	NA	NA	NA	NA	NA	NA	NA	NA	NA	NA	NA	NA	NA	17	0.0375725	0.91482	NA	NA	NA	NA	NA	NA	NA	NA	NA	20	0.0218935	1
GO:0016651~oxidoreductase activity, acting on NAD(P)H	NA	NA	NA	NA	NA	NA	NA	NA	NA	NA	NA	NA	NA	NA	NA	5	0.0377221	0.775267	NA	NA	NA	NA	NA	NA	NA	NA	NA	NA	NA	NA
GO:0046676~negative regulation of insulin secretion	NA	NA	NA	NA	NA	NA	NA	NA	NA	NA	NA	NA	NA	NA	NA	9	0.0384692	0.916743	NA	NA	NA	NA	NA	NA	NA	NA	NA	NA	NA	NA
GO:0070936~protein K48-linked ubiquitination	NA	NA	NA	NA	NA	NA	NA	NA	NA	NA	NA	NA	NA	NA	NA	11	0.0385889	0.914358	NA	NA	NA	NA	NA	NA	NA	NA	NA	14	0.00801654	0.688665
GO:0051539~4 iron, 4 sulfur cluster binding	NA	NA	NA	NA	NA	NA	NA	NA	NA	NA	NA	NA	NA	NA	NA	10	0.0388967	0.776033	NA	NA	NA	NA	NA	NA	NA	NA	NA	NA	NA	NA
GO:0050728~negative regulation of inflammatory response	NA	NA	NA	NA	NA	NA	NA	NA	NA	NA	NA	NA	NA	NA	NA	14	0.0395231	0.913477	NA	NA	NA	NA	NA	NA	NA	NA	NA	NA	NA	NA
GO:0031625~ubiquitin protein ligase binding	NA	NA	NA	NA	NA	NA	NA	NA	NA	NA	NA	NA	NA	NA	NA	44	0.0395399	0.762896	NA	NA	NA	NA	NA	NA	NA	NA	NA	NA	NA	NA
GO:0030018~Z disc	NA	NA	NA	NA	NA	NA	NA	NA	NA	NA	NA	NA	NA	NA	NA	20	0.0405183	0.511757	NA	NA	NA	NA	NA	NA	NA	NA	NA	NA	NA	NA
GO:0008023~transcription elongation factor complex	NA	NA	NA	NA	NA	NA	NA	NA	NA	NA	NA	NA	NA	NA	NA	7	0.0409348	0.507726	NA	NA	NA	NA	NA	NA	NA	NA	NA	NA	NA	NA
GO:0034706~sodium channel complex	NA	NA	NA	NA	NA	NA	NA	NA	NA	NA	NA	NA	NA	NA	NA	4	0.0418388	0.508006	NA	NA	NA	NA	NA	NA	NA	NA	NA	4	0.0399968	0.612994
GO:0034364~high-density lipoprotein particle	NA	NA	NA	NA	NA	NA	NA	NA	NA	NA	NA	NA	NA	NA	NA	4	0.0418388	0.508006	NA	NA	NA	NA	NA	NA	NA	NA	NA	NA	NA	NA
GO:0045444~fat cell differentiation	NA	NA	NA	NA	NA	NA	NA	NA	NA	NA	NA	NA	NA	NA	NA	15	0.0419444	0.920285	NA	NA	NA	NA	NA	NA	NA	NA	NA	18	0.0167342	1
GO:0033135~regulation of peptidyl-serine phosphorylation	NA	NA	NA	NA	NA	NA	NA	NA	NA	NA	NA	NA	NA	NA	NA	4	0.0420447	0.918014	NA	NA	NA	NA	NA	NA	NA	NA	NA	NA	NA	NA
GO:0019227~neuronal action potential propagation	NA	NA	NA	NA	NA	NA	NA	NA	NA	NA	NA	NA	NA	NA	NA	4	0.0420447	0.918014	NA	NA	NA	NA	NA	NA	NA	NA	NA	NA	NA	NA
GO:1901385~regulation of voltage-gated calcium channel activity	NA	NA	NA	NA	NA	NA	NA	NA	NA	NA	NA	NA	NA	NA	NA	4	0.0420447	0.918014	NA	NA	NA	NA	NA	NA	NA	NA	NA	5	0.00992163	0.798142
GO:0046498~S-adenosylhomocysteine metabolic process	NA	NA	NA	NA	NA	NA	NA	NA	NA	NA	NA	NA	NA	NA	NA	4	0.0420447	0.918014	NA	NA	NA	NA	NA	NA	NA	NA	NA	NA	NA	NA
GO:0045773~positive regulation of axon extension	NA	NA	NA	NA	NA	NA	NA	NA	NA	NA	NA	NA	NA	NA	NA	10	0.0450498	0.926724	NA	NA	NA	NA	NA	NA	NA	NA	NA	NA	NA	NA
GO:0016308~1-phosphatidylinositol-4-phosphate 5-kinase activity	NA	NA	NA	NA	NA	NA	NA	NA	NA	NA	NA	NA	NA	NA	NA	4	0.0451421	0.78224	NA	NA	NA	NA	NA	NA	NA	NA	NA	NA	NA	NA
GO:0010608~posttranscriptional regulation of gene expression	NA	NA	NA	NA	NA	NA	NA	NA	NA	NA	NA	NA	NA	NA	NA	6	0.0451634	0.924698	NA	NA	NA	NA	NA	NA	NA	NA	NA	NA	NA	NA
GO:0048384~retinoic acid receptor signaling pathway	NA	NA	NA	NA	NA	NA	NA	NA	NA	NA	NA	NA	NA	NA	NA	6	0.0451634	0.924698	NA	NA	NA	NA	NA	NA	NA	NA	NA	NA	NA	NA
GO:0005739~mitochondrion	NA	NA	NA	NA	NA	NA	NA	NA	NA	NA	NA	NA	NA	NA	NA	208	0.0467842	0.540952	NA	NA	NA	NA	NA	NA	NA	NA	NA	NA	NA	NA
GO:0060081~membrane hyperpolarization	NA	NA	NA	NA	NA	NA	NA	NA	NA	NA	NA	NA	NA	NA	NA	5	0.0469442	0.927385	NA	NA	NA	NA	NA	NA	NA	NA	NA	NA	NA	NA
GO:0045899~positive regulation of RNA polymerase II transcriptional preinitiation complex assembly	NA	NA	NA	NA	NA	NA	NA	NA	NA	NA	NA	NA	NA	NA	NA	5	0.0469442	0.927385	NA	NA	NA	NA	NA	NA	NA	NA	NA	NA	NA	NA
GO:0005884~actin filament	NA	NA	NA	NA	NA	NA	NA	NA	NA	NA	NA	NA	NA	NA	NA	14	0.0485801	0.547393	NA	NA	NA	NA	NA	NA	NA	NA	NA	NA	NA	NA
GO:0071013~catalytic step 2 spliceosome	NA	NA	NA	NA	NA	NA	NA	NA	NA	NA	NA	NA	NA	NA	NA	17	0.0492732	0.545358	NA	NA	NA	NA	NA	NA	NA	NA	NA	NA	NA	NA
GO:0008157~protein phosphatase 1 binding	NA	NA	NA	NA	NA	NA	NA	NA	NA	NA	NA	NA	NA	NA	NA	6	0.0499622	0.800277	NA	NA	NA	NA	NA	NA	NA	NA	NA	7	0.0202992	0.773505
GO:0008201~heparin binding	NA	NA	NA	NA	NA	NA	NA	NA	NA	NA	NA	NA	NA	NA	NA	NA	NA	NA	10	0.000309571	0.129519	NA	NA	NA	NA	NA	NA	NA	NA	NA
GO:0007275~multicellular organism development	NA	NA	NA	NA	NA	NA	NA	NA	NA	NA	NA	NA	NA	NA	NA	NA	NA	NA	25	0.00668146	0.999926	NA	NA	NA	NA	NA	NA	NA	NA	NA
mmu04512:ECM-receptor interaction	NA	NA	NA	NA	NA	NA	NA	NA	NA	NA	NA	NA	NA	NA	NA	NA	NA	NA	7	0.00845826	0.764023	NA	NA	NA	NA	NA	NA	NA	NA	NA
GO:0071310~cellular response to organic substance	NA	NA	NA	NA	NA	NA	NA	NA	NA	NA	NA	NA	NA	NA	NA	NA	NA	NA	4	0.0136401	0.992317	NA	NA	NA	NA	NA	NA	NA	NA	NA
GO:0016486~peptide hormone processing	NA	NA	NA	NA	NA	NA	NA	NA	NA	NA	NA	NA	NA	NA	NA	NA	NA	NA	3	0.0142513	0.982935	NA	NA	NA	NA	NA	NA	NA	NA	NA
mmu00590:Arachidonic acid metabolism	NA	NA	NA	NA	NA	NA	NA	NA	NA	NA	NA	NA	NA	NA	NA	NA	NA	NA	5	0.0147962	0.718346	NA	NA	NA	NA	NA	NA	NA	NA	NA
GO:0050840~extracellular matrix binding	NA	NA	NA	NA	NA	NA	NA	NA	NA	NA	NA	NA	NA	NA	NA	NA	NA	NA	4	0.017057	0.9788	NA	NA	NA	NA	NA	NA	NA	NA	NA
GO:0001953~negative regulation of cell-matrix adhesion	NA	NA	NA	NA	NA	NA	NA	NA	NA	NA	NA	NA	NA	NA	NA	NA	NA	NA	3	0.0172051	0.983453	NA	NA	NA	NA	NA	NA	NA	NA	NA
GO:0016491~oxidoreductase activity	NA	NA	NA	NA	NA	NA	NA	NA	NA	NA	NA	NA	NA	NA	NA	NA	NA	NA	17	0.0234152	0.970936	NA	NA	NA	NA	NA	NA	NA	NA	NA
GO:0045907~positive regulation of vasoconstriction	NA	NA	NA	NA	NA	NA	NA	NA	NA	NA	NA	NA	NA	NA	NA	NA	NA	NA	4	0.0234443	0.991817	NA	NA	NA	NA	NA	NA	NA	NA	NA
GO:0055114~oxidation-reduction process	NA	NA	NA	NA	NA	NA	NA	NA	NA	NA	NA	NA	NA	NA	NA	NA	NA	NA	18	0.0247755	0.988284	NA	NA	NA	NA	NA	NA	NA	NA	NA
GO:0005604~basement membrane	NA	NA	NA	NA	NA	NA	NA	NA	NA	NA	NA	NA	NA	NA	NA	NA	NA	NA	6	0.0270133	0.670784	NA	NA	NA	20	0.0359315	1	NA	NA	NA
GO:0010977~negative regulation of neuron projection development	NA	NA	NA	NA	NA	NA	NA	NA	NA	NA	NA	NA	NA	NA	NA	NA	NA	NA	5	0.0287743	0.984078	NA	NA	NA	NA	NA	NA	NA	NA	NA
GO:0006633~fatty acid biosynthetic process	NA	NA	NA	NA	NA	NA	NA	NA	NA	NA	NA	NA	NA	NA	NA	NA	NA	NA	5	0.0287743	0.984078	NA	NA	NA	NA	NA	NA	NA	NA	NA
GO:0051721~protein phosphatase 2A binding	NA	NA	NA	NA	NA	NA	NA	NA	NA	NA	NA	NA	NA	NA	NA	NA	NA	NA	4	0.0308418	0.93961	NA	NA	NA	NA	NA	NA	NA	NA	NA
GO:0048240~sperm capacitation	NA	NA	NA	NA	NA	NA	NA	NA	NA	NA	NA	NA	NA	NA	NA	NA	NA	NA	3	0.0312735	0.976588	NA	NA	NA	NA	NA	NA	NA	NA	NA
GO:0009966~regulation of signal transduction	NA	NA	NA	NA	NA	NA	NA	NA	NA	NA	NA	NA	NA	NA	NA	NA	NA	NA	4	0.031624	0.969958	NA	NA	NA	NA	NA	NA	NA	NA	NA
GO:0008292~acetylcholine biosynthetic process	NA	NA	NA	NA	NA	NA	NA	NA	NA	NA	NA	NA	NA	NA	NA	NA	NA	NA	2	0.0371303	0.978342	NA	NA	NA	NA	NA	NA	NA	NA	NA
GO:0010513~positive regulation of phosphatidylinositol biosynthetic process	NA	NA	NA	NA	NA	NA	NA	NA	NA	NA	NA	NA	NA	NA	NA	NA	NA	NA	2	0.0371303	0.978342	NA	NA	NA	NA	NA	NA	NA	NA	NA
GO:0007208~phospholipase C-activating serotonin receptor signaling pathway	NA	NA	NA	NA	NA	NA	NA	NA	NA	NA	NA	NA	NA	NA	NA	NA	NA	NA	2	0.0371303	0.978342	NA	NA	NA	NA	NA	NA	NA	NA	NA
GO:0005201~extracellular matrix structural constituent	NA	NA	NA	NA	NA	NA	NA	NA	NA	NA	NA	NA	NA	NA	NA	NA	NA	NA	4	0.0380974	0.944988	NA	NA	NA	NA	NA	NA	NA	NA	NA
GO:0004577~N-acetylglucosaminyldiphosphodolichol N-acetylglucosaminyltransferase activity	NA	NA	NA	NA	NA	NA	NA	NA	NA	NA	NA	NA	NA	NA	NA	NA	NA	NA	2	0.0388902	0.921028	NA	NA	NA	NA	NA	NA	NA	NA	NA
GO:0071886~1-(4-iodo-2,5-dimethoxyphenyl)propan-2-amine binding	NA	NA	NA	NA	NA	NA	NA	NA	NA	NA	NA	NA	NA	NA	NA	NA	NA	NA	2	0.0388902	0.921028	NA	NA	NA	NA	NA	NA	NA	NA	NA
GO:0004465~lipoprotein lipase activity	NA	NA	NA	NA	NA	NA	NA	NA	NA	NA	NA	NA	NA	NA	NA	NA	NA	NA	2	0.0388902	0.921028	NA	NA	NA	NA	NA	NA	NA	NA	NA
GO:0070208~protein heterotrimerization	NA	NA	NA	NA	NA	NA	NA	NA	NA	NA	NA	NA	NA	NA	NA	NA	NA	NA	3	0.0395298	0.977913	NA	NA	NA	NA	NA	NA	NA	NA	NA
GO:0030198~extracellular matrix organization	NA	NA	NA	NA	NA	NA	NA	NA	NA	NA	NA	NA	NA	NA	NA	NA	NA	NA	6	0.0397568	0.97255	NA	NA	NA	NA	NA	NA	NA	NA	NA
mmu05146:Amoebiasis	NA	NA	NA	NA	NA	NA	NA	NA	NA	NA	NA	NA	NA	NA	NA	NA	NA	NA	6	0.0420663	0.912433	NA	NA	NA	NA	NA	NA	NA	NA	NA
GO:0030864~cortical actin cytoskeleton	NA	NA	NA	NA	NA	NA	NA	NA	NA	NA	NA	NA	NA	NA	NA	NA	NA	NA	4	0.0450079	0.805019	NA	NA	NA	12	0.0257157	1	NA	NA	NA
GO:0052689~carboxylic ester hydrolase activity	NA	NA	NA	NA	NA	NA	NA	NA	NA	NA	NA	NA	NA	NA	NA	NA	NA	NA	4	0.0461429	0.929031	NA	NA	NA	NA	NA	NA	NA	NA	NA
GO:0046658~anchored component of plasma membrane	NA	NA	NA	NA	NA	NA	NA	NA	NA	NA	NA	NA	NA	NA	NA	NA	NA	NA	3	0.049571	0.798978	NA	NA	NA	NA	NA	NA	NA	NA	NA
GO:0050774~negative regulation of dendrite morphogenesis	NA	NA	NA	NA	NA	NA	NA	NA	NA	NA	NA	NA	NA	NA	NA	NA	NA	NA	NA	NA	NA	5	0.000217826	0.194	NA	NA	NA	NA	NA	NA
GO:0009615~response to virus	NA	NA	NA	NA	NA	NA	NA	NA	NA	NA	NA	NA	NA	NA	NA	NA	NA	NA	NA	NA	NA	10	0.00025258	0.153567	NA	NA	NA	NA	NA	NA
GO:0035458~cellular response to interferon-beta	NA	NA	NA	NA	NA	NA	NA	NA	NA	NA	NA	NA	NA	NA	NA	NA	NA	NA	NA	NA	NA	7	0.000682153	0.236792	NA	NA	NA	NA	NA	NA
GO:0043524~negative regulation of neuron apoptotic process	NA	NA	NA	NA	NA	NA	NA	NA	NA	NA	NA	NA	NA	NA	NA	NA	NA	NA	NA	NA	NA	14	0.000702053	0.206863	NA	NA	NA	NA	NA	NA
GO:0031224~intrinsic component of membrane	NA	NA	NA	NA	NA	NA	NA	NA	NA	NA	NA	NA	NA	NA	NA	NA	NA	NA	NA	NA	NA	4	0.00618195	0.207757	NA	NA	NA	NA	NA	NA
GO:0035810~positive regulation of urine volume	NA	NA	NA	NA	NA	NA	NA	NA	NA	NA	NA	NA	NA	NA	NA	NA	NA	NA	NA	NA	NA	4	0.00646303	0.551746	NA	NA	NA	NA	NA	NA
GO:0071372~cellular response to follicle-stimulating hormone stimulus	NA	NA	NA	NA	NA	NA	NA	NA	NA	NA	NA	NA	NA	NA	NA	NA	NA	NA	NA	NA	NA	4	0.00646303	0.551746	NA	NA	NA	NA	NA	NA
GO:0045071~negative regulation of viral genome replication	NA	NA	NA	NA	NA	NA	NA	NA	NA	NA	NA	NA	NA	NA	NA	NA	NA	NA	NA	NA	NA	5	0.00651549	0.532963	NA	NA	NA	NA	NA	NA
GO:0008285~negative regulation of cell proliferation	NA	NA	NA	NA	NA	NA	NA	NA	NA	NA	NA	NA	NA	NA	NA	NA	NA	NA	NA	NA	NA	20	0.00780488	0.577643	NA	NA	NA	NA	NA	NA
GO:0006839~mitochondrial transport	NA	NA	NA	NA	NA	NA	NA	NA	NA	NA	NA	NA	NA	NA	NA	NA	NA	NA	NA	NA	NA	4	0.00819649	0.575855	NA	NA	NA	NA	NA	NA
GO:0007187~G-protein coupled receptor signaling pathway, coupled to cyclic nucleotide second messenger	NA	NA	NA	NA	NA	NA	NA	NA	NA	NA	NA	NA	NA	NA	NA	NA	NA	NA	NA	NA	NA	4	0.0101773	0.618821	NA	NA	NA	NA	NA	NA
GO:0001963~synaptic transmission, dopaminergic	NA	NA	NA	NA	NA	NA	NA	NA	NA	NA	NA	NA	NA	NA	NA	NA	NA	NA	NA	NA	NA	4	0.0101773	0.618821	NA	NA	NA	NA	NA	NA
GO:0035255~ionotropic glutamate receptor binding	NA	NA	NA	NA	NA	NA	NA	NA	NA	NA	NA	NA	NA	NA	NA	NA	NA	NA	NA	NA	NA	5	0.0113056	0.83174	NA	NA	NA	10	0.0112352	0.560984
GO:0051592~response to calcium ion	NA	NA	NA	NA	NA	NA	NA	NA	NA	NA	NA	NA	NA	NA	NA	NA	NA	NA	NA	NA	NA	7	0.0134411	0.704149	NA	NA	NA	15	0.034039	1
GO:0006198~cAMP catabolic process	NA	NA	NA	NA	NA	NA	NA	NA	NA	NA	NA	NA	NA	NA	NA	NA	NA	NA	NA	NA	NA	4	0.0149042	0.725477	NA	NA	NA	NA	NA	NA
GO:0004112~cyclic-nucleotide phosphodiesterase activity	NA	NA	NA	NA	NA	NA	NA	NA	NA	NA	NA	NA	NA	NA	NA	NA	NA	NA	NA	NA	NA	3	0.0149719	0.84918	NA	NA	NA	NA	NA	NA
GO:0045785~positive regulation of cell adhesion	NA	NA	NA	NA	NA	NA	NA	NA	NA	NA	NA	NA	NA	NA	NA	NA	NA	NA	NA	NA	NA	6	0.0149923	0.712414	NA	NA	NA	NA	NA	NA
GO:0016323~basolateral plasma membrane	NA	NA	NA	NA	NA	NA	NA	NA	NA	NA	NA	NA	NA	NA	NA	NA	NA	NA	NA	NA	NA	12	0.0193447	0.356074	NA	NA	NA	35	0.0132281	0.256374
GO:0007265~Ras protein signal transduction	NA	NA	NA	NA	NA	NA	NA	NA	NA	NA	NA	NA	NA	NA	NA	NA	NA	NA	NA	NA	NA	6	0.0195346	0.777395	NA	NA	NA	NA	NA	NA
GO:0020005~symbiont-containing vacuole membrane	NA	NA	NA	NA	NA	NA	NA	NA	NA	NA	NA	NA	NA	NA	NA	NA	NA	NA	NA	NA	NA	3	0.0202064	0.3336	NA	NA	NA	NA	NA	NA
GO:0004114~3',5'-cyclic-nucleotide phosphodiesterase activity	NA	NA	NA	NA	NA	NA	NA	NA	NA	NA	NA	NA	NA	NA	NA	NA	NA	NA	NA	NA	NA	4	0.0202294	0.798454	NA	NA	NA	NA	NA	NA
GO:0007271~synaptic transmission, cholinergic	NA	NA	NA	NA	NA	NA	NA	NA	NA	NA	NA	NA	NA	NA	NA	NA	NA	NA	NA	NA	NA	4	0.0206767	0.771786	NA	NA	NA	7	0.0425252	1
GO:0048148~behavioral response to cocaine	NA	NA	NA	NA	NA	NA	NA	NA	NA	NA	NA	NA	NA	NA	NA	NA	NA	NA	NA	NA	NA	4	0.0206767	0.771786	NA	NA	NA	NA	NA	NA
GO:1901386~negative regulation of voltage-gated calcium channel activity	NA	NA	NA	NA	NA	NA	NA	NA	NA	NA	NA	NA	NA	NA	NA	NA	NA	NA	NA	NA	NA	3	0.0208292	0.762397	NA	NA	NA	NA	NA	NA
GO:0071305~cellular response to vitamin D	NA	NA	NA	NA	NA	NA	NA	NA	NA	NA	NA	NA	NA	NA	NA	NA	NA	NA	NA	NA	NA	3	0.0208292	0.762397	NA	NA	NA	NA	NA	NA
GO:0034341~response to interferon-gamma	NA	NA	NA	NA	NA	NA	NA	NA	NA	NA	NA	NA	NA	NA	NA	NA	NA	NA	NA	NA	NA	4	0.0239596	0.78753	NA	NA	NA	NA	NA	NA
GO:0002028~regulation of sodium ion transport	NA	NA	NA	NA	NA	NA	NA	NA	NA	NA	NA	NA	NA	NA	NA	NA	NA	NA	NA	NA	NA	4	0.0239596	0.78753	NA	NA	NA	NA	NA	NA
GO:0010628~positive regulation of gene expression	NA	NA	NA	NA	NA	NA	NA	NA	NA	NA	NA	NA	NA	NA	NA	NA	NA	NA	NA	NA	NA	18	0.0255158	0.797958	NA	NA	NA	NA	NA	NA
GO:0046069~cGMP catabolic process	NA	NA	NA	NA	NA	NA	NA	NA	NA	NA	NA	NA	NA	NA	NA	NA	NA	NA	NA	NA	NA	3	0.0271666	0.798898	NA	NA	NA	NA	NA	NA
GO:0042832~defense response to protozoan	NA	NA	NA	NA	NA	NA	NA	NA	NA	NA	NA	NA	NA	NA	NA	NA	NA	NA	NA	NA	NA	4	0.0275071	0.793596	NA	NA	NA	NA	NA	NA
GO:0033613~activating transcription factor binding	NA	NA	NA	NA	NA	NA	NA	NA	NA	NA	NA	NA	NA	NA	NA	NA	NA	NA	NA	NA	NA	4	0.0306593	0.830505	NA	NA	NA	NA	NA	NA
GO:0051607~defense response to virus	NA	NA	NA	NA	NA	NA	NA	NA	NA	NA	NA	NA	NA	NA	NA	NA	NA	NA	NA	NA	NA	9	0.0335136	0.846621	NA	NA	NA	NA	NA	NA
GO:0007625~grooming behavior	NA	NA	NA	NA	NA	NA	NA	NA	NA	NA	NA	NA	NA	NA	NA	NA	NA	NA	NA	NA	NA	3	0.0341689	0.8444	NA	NA	NA	NA	NA	NA
GO:0060158~phospholipase C-activating dopamine receptor signaling pathway	NA	NA	NA	NA	NA	NA	NA	NA	NA	NA	NA	NA	NA	NA	NA	NA	NA	NA	NA	NA	NA	3	0.0341689	0.8444	NA	NA	NA	NA	NA	NA
GO:0035815~positive regulation of renal sodium excretion	NA	NA	NA	NA	NA	NA	NA	NA	NA	NA	NA	NA	NA	NA	NA	NA	NA	NA	NA	NA	NA	3	0.0341689	0.8444	NA	NA	NA	NA	NA	NA
GO:0035634~response to stilbenoid	NA	NA	NA	NA	NA	NA	NA	NA	NA	NA	NA	NA	NA	NA	NA	NA	NA	NA	NA	NA	NA	3	0.0341689	0.8444	NA	NA	NA	NA	NA	NA
GO:0071243~cellular response to arsenic-containing substance	NA	NA	NA	NA	NA	NA	NA	NA	NA	NA	NA	NA	NA	NA	NA	NA	NA	NA	NA	NA	NA	3	0.0341689	0.8444	NA	NA	NA	NA	NA	NA
GO:0007189~adenylate cyclase-activating G-protein coupled receptor signaling pathway	NA	NA	NA	NA	NA	NA	NA	NA	NA	NA	NA	NA	NA	NA	NA	NA	NA	NA	NA	NA	NA	5	0.036795	0.850922	NA	NA	NA	NA	NA	NA
GO:0030154~cell differentiation	NA	NA	NA	NA	NA	NA	NA	NA	NA	NA	NA	NA	NA	NA	NA	NA	NA	NA	NA	NA	NA	29	0.037115	0.846208	NA	NA	NA	NA	NA	NA
GO:0019899~enzyme binding	NA	NA	NA	NA	NA	NA	NA	NA	NA	NA	NA	NA	NA	NA	NA	NA	NA	NA	NA	NA	NA	19	0.0388472	0.852067	NA	NA	NA	NA	NA	NA
GO:0014883~transition between fast and slow fiber	NA	NA	NA	NA	NA	NA	NA	NA	NA	NA	NA	NA	NA	NA	NA	NA	NA	NA	NA	NA	NA	3	0.0417849	0.859901	NA	NA	NA	NA	NA	NA
GO:0070528~protein kinase C signaling	NA	NA	NA	NA	NA	NA	NA	NA	NA	NA	NA	NA	NA	NA	NA	NA	NA	NA	NA	NA	NA	3	0.0417849	0.859901	NA	NA	NA	NA	NA	NA
GO:0030552~cAMP binding	NA	NA	NA	NA	NA	NA	NA	NA	NA	NA	NA	NA	NA	NA	NA	NA	NA	NA	NA	NA	NA	4	0.0481508	0.872899	NA	NA	NA	NA	NA	NA
GO:0060080~inhibitory postsynaptic potential	NA	NA	NA	NA	NA	NA	NA	NA	NA	NA	NA	NA	NA	NA	NA	NA	NA	NA	NA	NA	NA	3	0.0499662	0.895162	NA	NA	NA	NA	NA	NA
GO:0007229~integrin-mediated signaling pathway	NA	NA	NA	NA	NA	NA	NA	NA	NA	NA	NA	NA	NA	NA	NA	NA	NA	NA	NA	NA	NA	NA	NA	NA	19	0.00762213	1	NA	NA	NA
GO:0071896~protein localization to adherens junction	NA	NA	NA	NA	NA	NA	NA	NA	NA	NA	NA	NA	NA	NA	NA	NA	NA	NA	NA	NA	NA	NA	NA	NA	4	0.00935983	1	NA	NA	NA
GO:0001917~photoreceptor inner segment	NA	NA	NA	NA	NA	NA	NA	NA	NA	NA	NA	NA	NA	NA	NA	NA	NA	NA	NA	NA	NA	NA	NA	NA	11	0.0147246	1	NA	NA	NA
GO:0008305~integrin complex	NA	NA	NA	NA	NA	NA	NA	NA	NA	NA	NA	NA	NA	NA	NA	NA	NA	NA	NA	NA	NA	NA	NA	NA	8	0.0197293	1	NA	NA	NA
GO:0010001~glial cell differentiation	NA	NA	NA	NA	NA	NA	NA	NA	NA	NA	NA	NA	NA	NA	NA	NA	NA	NA	NA	NA	NA	NA	NA	NA	7	0.0216098	1	NA	NA	NA
mmu00512:Mucin type O-Glycan biosynthesis	NA	NA	NA	NA	NA	NA	NA	NA	NA	NA	NA	NA	NA	NA	NA	NA	NA	NA	NA	NA	NA	NA	NA	NA	8	0.023671	0.896373	NA	NA	NA
GO:0001750~photoreceptor outer segment	NA	NA	NA	NA	NA	NA	NA	NA	NA	NA	NA	NA	NA	NA	NA	NA	NA	NA	NA	NA	NA	NA	NA	NA	12	0.0257157	1	NA	NA	NA
GO:0009116~nucleoside metabolic process	NA	NA	NA	NA	NA	NA	NA	NA	NA	NA	NA	NA	NA	NA	NA	NA	NA	NA	NA	NA	NA	NA	NA	NA	7	0.0287282	1	NA	NA	NA
GO:0007160~cell-matrix adhesion	NA	NA	NA	NA	NA	NA	NA	NA	NA	NA	NA	NA	NA	NA	NA	NA	NA	NA	NA	NA	NA	NA	NA	NA	15	0.0350937	1	NA	NA	NA
GO:0045296~cadherin binding	NA	NA	NA	NA	NA	NA	NA	NA	NA	NA	NA	NA	NA	NA	NA	NA	NA	NA	NA	NA	NA	NA	NA	NA	9	0.0376464	1	NA	NA	NA
GO:0090382~phagosome maturation	NA	NA	NA	NA	NA	NA	NA	NA	NA	NA	NA	NA	NA	NA	NA	NA	NA	NA	NA	NA	NA	NA	NA	NA	4	0.0377423	1	NA	NA	NA
GO:0001968~fibronectin binding	NA	NA	NA	NA	NA	NA	NA	NA	NA	NA	NA	NA	NA	NA	NA	NA	NA	NA	NA	NA	NA	NA	NA	NA	8	0.0380974	1	NA	NA	NA
GO:0045600~positive regulation of fat cell differentiation	NA	NA	NA	NA	NA	NA	NA	NA	NA	NA	NA	NA	NA	NA	NA	NA	NA	NA	NA	NA	NA	NA	NA	NA	12	0.0383464	1	NA	NA	NA
GO:0004653~polypeptide N-acetylgalactosaminyltransferase activity	NA	NA	NA	NA	NA	NA	NA	NA	NA	NA	NA	NA	NA	NA	NA	NA	NA	NA	NA	NA	NA	NA	NA	NA	6	0.0447867	1	NA	NA	NA
GO:0006629~lipid metabolic process	NA	NA	NA	NA	NA	NA	NA	NA	NA	NA	NA	NA	NA	NA	NA	NA	NA	NA	NA	NA	NA	NA	NA	NA	64	0.0454742	1	NA	NA	NA
GO:0001673~male germ cell nucleus	NA	NA	NA	NA	NA	NA	NA	NA	NA	NA	NA	NA	NA	NA	NA	NA	NA	NA	NA	NA	NA	NA	NA	NA	6	0.0469326	1	NA	NA	NA
GO:0001964~startle response	NA	NA	NA	NA	NA	NA	NA	NA	NA	NA	NA	NA	NA	NA	NA	NA	NA	NA	NA	NA	NA	NA	NA	NA	NA	NA	NA	10	0.000879754	0.159137
GO:0043153~entrainment of circadian clock by photoperiod	NA	NA	NA	NA	NA	NA	NA	NA	NA	NA	NA	NA	NA	NA	NA	NA	NA	NA	NA	NA	NA	NA	NA	NA	NA	NA	NA	9	0.00417865	0.461542
GO:0051291~protein heterooligomerization	NA	NA	NA	NA	NA	NA	NA	NA	NA	NA	NA	NA	NA	NA	NA	NA	NA	NA	NA	NA	NA	NA	NA	NA	NA	NA	NA	21	0.00618392	0.583469
mmu05322:Systemic lupus erythematosus	NA	NA	NA	NA	NA	NA	NA	NA	NA	NA	NA	NA	NA	NA	NA	NA	NA	NA	NA	NA	NA	NA	NA	NA	NA	NA	NA	17	0.00871932	0.0995456
GO:0032981~mitochondrial respiratory chain complex I assembly	NA	NA	NA	NA	NA	NA	NA	NA	NA	NA	NA	NA	NA	NA	NA	NA	NA	NA	NA	NA	NA	NA	NA	NA	NA	NA	NA	8	0.00874044	0.724052
GO:0005955~calcineurin complex	NA	NA	NA	NA	NA	NA	NA	NA	NA	NA	NA	NA	NA	NA	NA	NA	NA	NA	NA	NA	NA	NA	NA	NA	NA	NA	NA	4	0.00996839	0.202857
GO:0008144~drug binding	NA	NA	NA	NA	NA	NA	NA	NA	NA	NA	NA	NA	NA	NA	NA	NA	NA	NA	NA	NA	NA	NA	NA	NA	NA	NA	NA	21	0.012168	0.587309
mmu04144:Endocytosis	NA	NA	NA	NA	NA	NA	NA	NA	NA	NA	NA	NA	NA	NA	NA	NA	NA	NA	NA	NA	NA	NA	NA	NA	NA	NA	NA	47	0.0130349	0.137368
GO:0047485~protein N-terminus binding	NA	NA	NA	NA	NA	NA	NA	NA	NA	NA	NA	NA	NA	NA	NA	NA	NA	NA	NA	NA	NA	NA	NA	NA	NA	NA	NA	26	0.0153903	0.696411
GO:0000166~nucleotide binding	NA	NA	NA	NA	NA	NA	NA	NA	NA	NA	NA	NA	NA	NA	NA	NA	NA	NA	NA	NA	NA	NA	NA	NA	NA	NA	NA	283	0.0164058	0.719865
GO:0050890~cognition	NA	NA	NA	NA	NA	NA	NA	NA	NA	NA	NA	NA	NA	NA	NA	NA	NA	NA	NA	NA	NA	NA	NA	NA	NA	NA	NA	11	0.0167101	1
GO:0005794~Golgi apparatus	NA	NA	NA	NA	NA	NA	NA	NA	NA	NA	NA	NA	NA	NA	NA	NA	NA	NA	NA	NA	NA	NA	NA	NA	NA	NA	NA	178	0.0171334	0.316967
GO:0035418~protein localization to synapse	NA	NA	NA	NA	NA	NA	NA	NA	NA	NA	NA	NA	NA	NA	NA	NA	NA	NA	NA	NA	NA	NA	NA	NA	NA	NA	NA	7	0.0182389	1
GO:0008202~steroid metabolic process	NA	NA	NA	NA	NA	NA	NA	NA	NA	NA	NA	NA	NA	NA	NA	NA	NA	NA	NA	NA	NA	NA	NA	NA	NA	NA	NA	16	0.0183898	1
GO:0004683~calmodulin-dependent protein kinase activity	NA	NA	NA	NA	NA	NA	NA	NA	NA	NA	NA	NA	NA	NA	NA	NA	NA	NA	NA	NA	NA	NA	NA	NA	NA	NA	NA	8	0.0185726	0.747716
GO:0008066~glutamate receptor activity	NA	NA	NA	NA	NA	NA	NA	NA	NA	NA	NA	NA	NA	NA	NA	NA	NA	NA	NA	NA	NA	NA	NA	NA	NA	NA	NA	5	0.019106	0.747716
GO:0005938~cell cortex	NA	NA	NA	NA	NA	NA	NA	NA	NA	NA	NA	NA	NA	NA	NA	NA	NA	NA	NA	NA	NA	NA	NA	NA	NA	NA	NA	28	0.0208464	0.36889
GO:0015459~potassium channel regulator activity	NA	NA	NA	NA	NA	NA	NA	NA	NA	NA	NA	NA	NA	NA	NA	NA	NA	NA	NA	NA	NA	NA	NA	NA	NA	NA	NA	10	0.0229111	0.829383
GO:0000786~nucleosome	NA	NA	NA	NA	NA	NA	NA	NA	NA	NA	NA	NA	NA	NA	NA	NA	NA	NA	NA	NA	NA	NA	NA	NA	NA	NA	NA	10	0.0233794	0.396475
mmu04114:Oocyte meiosis	NA	NA	NA	NA	NA	NA	NA	NA	NA	NA	NA	NA	NA	NA	NA	NA	NA	NA	NA	NA	NA	NA	NA	NA	NA	NA	NA	23	0.0235814	0.215377
GO:0042220~response to cocaine	NA	NA	NA	NA	NA	NA	NA	NA	NA	NA	NA	NA	NA	NA	NA	NA	NA	NA	NA	NA	NA	NA	NA	NA	NA	NA	NA	11	0.0248707	1
GO:0071625~vocalization behavior	NA	NA	NA	NA	NA	NA	NA	NA	NA	NA	NA	NA	NA	NA	NA	NA	NA	NA	NA	NA	NA	NA	NA	NA	NA	NA	NA	6	0.0275104	1
GO:0032794~GTPase activating protein binding	NA	NA	NA	NA	NA	NA	NA	NA	NA	NA	NA	NA	NA	NA	NA	NA	NA	NA	NA	NA	NA	NA	NA	NA	NA	NA	NA	7	0.0276008	0.868825
GO:1902188~positive regulation of viral release from host cell	NA	NA	NA	NA	NA	NA	NA	NA	NA	NA	NA	NA	NA	NA	NA	NA	NA	NA	NA	NA	NA	NA	NA	NA	NA	NA	NA	5	0.0282123	1
GO:0033603~positive regulation of dopamine secretion	NA	NA	NA	NA	NA	NA	NA	NA	NA	NA	NA	NA	NA	NA	NA	NA	NA	NA	NA	NA	NA	NA	NA	NA	NA	NA	NA	5	0.0282123	1
GO:0007213~G-protein coupled acetylcholine receptor signaling pathway	NA	NA	NA	NA	NA	NA	NA	NA	NA	NA	NA	NA	NA	NA	NA	NA	NA	NA	NA	NA	NA	NA	NA	NA	NA	NA	NA	5	0.0282123	1
GO:0016192~vesicle-mediated transport	NA	NA	NA	NA	NA	NA	NA	NA	NA	NA	NA	NA	NA	NA	NA	NA	NA	NA	NA	NA	NA	NA	NA	NA	NA	NA	NA	40	0.0285608	1
GO:0016594~glycine binding	NA	NA	NA	NA	NA	NA	NA	NA	NA	NA	NA	NA	NA	NA	NA	NA	NA	NA	NA	NA	NA	NA	NA	NA	NA	NA	NA	6	0.0301319	0.919759
GO:0050662~coenzyme binding	NA	NA	NA	NA	NA	NA	NA	NA	NA	NA	NA	NA	NA	NA	NA	NA	NA	NA	NA	NA	NA	NA	NA	NA	NA	NA	NA	5	0.0304892	0.919759
GO:0001816~cytokine production	NA	NA	NA	NA	NA	NA	NA	NA	NA	NA	NA	NA	NA	NA	NA	NA	NA	NA	NA	NA	NA	NA	NA	NA	NA	NA	NA	7	0.0329398	1
GO:0046488~phosphatidylinositol metabolic process	NA	NA	NA	NA	NA	NA	NA	NA	NA	NA	NA	NA	NA	NA	NA	NA	NA	NA	NA	NA	NA	NA	NA	NA	NA	NA	NA	8	0.0355749	1
GO:0000788~nuclear nucleosome	NA	NA	NA	NA	NA	NA	NA	NA	NA	NA	NA	NA	NA	NA	NA	NA	NA	NA	NA	NA	NA	NA	NA	NA	NA	NA	NA	6	0.0366197	0.584479
GO:1902187~negative regulation of viral release from host cell	NA	NA	NA	NA	NA	NA	NA	NA	NA	NA	NA	NA	NA	NA	NA	NA	NA	NA	NA	NA	NA	NA	NA	NA	NA	NA	NA	6	0.0379072	1
GO:0032469~endoplasmic reticulum calcium ion homeostasis	NA	NA	NA	NA	NA	NA	NA	NA	NA	NA	NA	NA	NA	NA	NA	NA	NA	NA	NA	NA	NA	NA	NA	NA	NA	NA	NA	6	0.0379072	1
GO:0007623~circadian rhythm	NA	NA	NA	NA	NA	NA	NA	NA	NA	NA	NA	NA	NA	NA	NA	NA	NA	NA	NA	NA	NA	NA	NA	NA	NA	NA	NA	20	0.0383384	1
GO:0031410~cytoplasmic vesicle	NA	NA	NA	NA	NA	NA	NA	NA	NA	NA	NA	NA	NA	NA	NA	NA	NA	NA	NA	NA	NA	NA	NA	NA	NA	NA	NA	96	0.0395005	0.612994
GO:0031435~mitogen-activated protein kinase kinase kinase binding	NA	NA	NA	NA	NA	NA	NA	NA	NA	NA	NA	NA	NA	NA	NA	NA	NA	NA	NA	NA	NA	NA	NA	NA	NA	NA	NA	8	0.0397448	1
GO:0001047~core promoter binding	NA	NA	NA	NA	NA	NA	NA	NA	NA	NA	NA	NA	NA	NA	NA	NA	NA	NA	NA	NA	NA	NA	NA	NA	NA	NA	NA	15	0.0403815	1
GO:0014061~regulation of norepinephrine secretion	NA	NA	NA	NA	NA	NA	NA	NA	NA	NA	NA	NA	NA	NA	NA	NA	NA	NA	NA	NA	NA	NA	NA	NA	NA	NA	NA	4	0.0409626	1
GO:0017053~transcriptional repressor complex	NA	NA	NA	NA	NA	NA	NA	NA	NA	NA	NA	NA	NA	NA	NA	NA	NA	NA	NA	NA	NA	NA	NA	NA	NA	NA	NA	13	0.0414185	0.612994
GO:0007191~adenylate cyclase-activating dopamine receptor signaling pathway	NA	NA	NA	NA	NA	NA	NA	NA	NA	NA	NA	NA	NA	NA	NA	NA	NA	NA	NA	NA	NA	NA	NA	NA	NA	NA	NA	5	0.0418355	1
mmu04961:Endocrine and other factor-regulated calcium reabsorption	NA	NA	NA	NA	NA	NA	NA	NA	NA	NA	NA	NA	NA	NA	NA	NA	NA	NA	NA	NA	NA	NA	NA	NA	NA	NA	NA	11	0.0419117	0.328108
GO:0007585~respiratory gaseous exchange	NA	NA	NA	NA	NA	NA	NA	NA	NA	NA	NA	NA	NA	NA	NA	NA	NA	NA	NA	NA	NA	NA	NA	NA	NA	NA	NA	7	0.0425252	1
GO:0004000~adenosine deaminase activity	NA	NA	NA	NA	NA	NA	NA	NA	NA	NA	NA	NA	NA	NA	NA	NA	NA	NA	NA	NA	NA	NA	NA	NA	NA	NA	NA	4	0.0435369	1
GO:0019871~sodium channel inhibitor activity	NA	NA	NA	NA	NA	NA	NA	NA	NA	NA	NA	NA	NA	NA	NA	NA	NA	NA	NA	NA	NA	NA	NA	NA	NA	NA	NA	4	0.0435369	1
GO:0000155~phosphorelay sensor kinase activity	NA	NA	NA	NA	NA	NA	NA	NA	NA	NA	NA	NA	NA	NA	NA	NA	NA	NA	NA	NA	NA	NA	NA	NA	NA	NA	NA	4	0.0435369	1
GO:0050769~positive regulation of neurogenesis	NA	NA	NA	NA	NA	NA	NA	NA	NA	NA	NA	NA	NA	NA	NA	NA	NA	NA	NA	NA	NA	NA	NA	NA	NA	NA	NA	9	0.0443347	1
mmu04270:Vascular smooth muscle contraction	NA	NA	NA	NA	NA	NA	NA	NA	NA	NA	NA	NA	NA	NA	NA	NA	NA	NA	NA	NA	NA	NA	NA	NA	NA	NA	NA	21	0.0452343	0.334978
GO:0031434~mitogen-activated protein kinase kinase binding	NA	NA	NA	NA	NA	NA	NA	NA	NA	NA	NA	NA	NA	NA	NA	NA	NA	NA	NA	NA	NA	NA	NA	NA	NA	NA	NA	7	0.0469126	1
GO:0001965~G-protein alpha-subunit binding	NA	NA	NA	NA	NA	NA	NA	NA	NA	NA	NA	NA	NA	NA	NA	NA	NA	NA	NA	NA	NA	NA	NA	NA	NA	NA	NA	9	0.0498542	1
GO:0016874~ligase activity	NA	NA	NA	NA	NA	NA	NA	NA	NA	NA	NA	NA	NA	NA	NA	NA	NA	NA	NA	NA	NA	NA	NA	NA	NA	NA	NA	61	0.0499563	1

## Sheet: Pathways_UP&DOWN_DEGs(FDR<0.05)
Up and down-regulated GO and KEGG pathways based on differentially expressed genes with FDR <0.05
	HttQ111/+ vs Htt+/+ in Hdac2 WT (contrast 3)						Hdac2 KO vs Hdac2 WT in HttQ111/+ (contrast 2)						Hdac2 KO vs Hdac2 WT in Ht+/+ (contrast 1)						HttQ111/+ vs +/+ in Hdac2 KO (contrast 4)						HttQ111/+ Hdac2 KO vs Htt+/+ Hdac2 WT (contrast 5)
	UP			DOWN			UP			DOWN			UP			DOWN			UP			DOWN			UP			DOWN
	Count	P value	FDR	Count	P value	FDR	Count	P value	FDR	Count	P value	FDR	Count	P value	FDR	Count	P value	FDR	Count	P value	FDR	Count	P value	FDR	Count	P value	FDR	Count	P value	FDR
GO:0016021~integral component of membrane	10	0.00305669	0.144552	NA	NA	NA	308	8.31489e-05	0.0129427	273	0.000174443	0.00615677	330	0.00384088	0.240752	295	0.000782461	0.0215696	NA	NA	NA	NA	NA	NA	383	0.000396729	0.105331	381	0.00799525	0.144125
GO:0030054~cell junction	4	0.0213417	0.42311	NA	NA	NA	65	0.000461969	0.0425053	87	1.21936e-13	2.15767e-11	69	0.00178473	0.200475	90	2.76062e-12	4.03733e-10	NA	NA	NA	NA	NA	NA	72	0.0118775	0.652256	114	2.69901e-13	2.64117e-11
GO:0032281~AMPA glutamate receptor complex	2	0.0286576	0.39	NA	NA	NA	NA	NA	NA	NA	NA	NA	NA	NA	NA	NA	NA	NA	NA	NA	NA	NA	NA	NA	NA	NA	NA	NA	NA	NA
GO:0043025~neuronal cell body	NA	NA	NA	5	0.00726372	0.404054	NA	NA	NA	63	3.43906e-09	2.60877e-07	NA	NA	NA	69	9.99228e-10	7.30686e-08	NA	NA	NA	NA	NA	NA	NA	NA	NA	93	6.85554e-13	5.87006e-11
GO:0098794~postsynapse	NA	NA	NA	2	0.0370246	0.737977	NA	NA	NA	NA	NA	NA	NA	NA	NA	NA	NA	NA	NA	NA	NA	NA	NA	NA	NA	NA	NA	NA	NA	NA
GO:0005886~plasma membrane	NA	NA	NA	NA	NA	NA	264	2.82987e-09	1.33004e-06	257	6.74412e-14	1.78921e-11	290	1.59534e-08	7.99264e-06	272	6.38173e-12	7.46669e-10	NA	NA	NA	NA	NA	NA	325	1.22994e-08	6.531e-06	365	8.32372e-15	1.42544e-12
GO:0005615~extracellular space	NA	NA	NA	NA	NA	NA	87	1.46391e-06	0.000343961	NA	NA	NA	72	0.049234	0.608128	NA	NA	NA	NA	NA	NA	NA	NA	NA	83	0.0240335	0.797611	NA	NA	NA
GO:0007156~homophilic cell adhesion via plasma membrane adhesion molecules	NA	NA	NA	NA	NA	NA	23	1.46642e-06	0.00444071	NA	NA	NA	29	2.48237e-09	7.71766e-06	NA	NA	NA	NA	NA	NA	NA	NA	NA	35	5.77235e-12	1.9372e-08	NA	NA	NA
GO:0005509~calcium ion binding	NA	NA	NA	NA	NA	NA	63	3.32317e-06	0.00318185	45	0.00730848	0.324283	74	7.60382e-08	7.83923e-05	NA	NA	NA	NA	NA	NA	NA	NA	NA	85	2.5157e-09	2.77481e-06	NA	NA	NA
GO:0005576~extracellular region	NA	NA	NA	NA	NA	NA	92	0.000117411	0.0137019	NA	NA	NA	93	0.00345393	0.250915	NA	NA	NA	NA	NA	NA	NA	NA	NA	106	0.00143591	0.217551	NA	NA	NA
GO:0005215~transporter activity	NA	NA	NA	NA	NA	NA	21	0.00020277	0.0926602	NA	NA	NA	20	0.00251649	0.579338	NA	NA	NA	NA	NA	NA	NA	NA	NA	NA	NA	NA	NA	NA	NA
GO:0006811~ion transport	NA	NA	NA	NA	NA	NA	50	0.000503588	0.534381	48	9.04025e-05	0.0282424	53	0.00136499	0.757208	57	3.28497e-06	0.00334725	NA	NA	NA	NA	NA	NA	56	0.00459862	1	71	4.11847e-06	0.00185949
GO:0005578~proteinaceous extracellular matrix	NA	NA	NA	NA	NA	NA	31	0.000564101	0.0432378	NA	NA	NA	28	0.020239	0.494859	NA	NA	NA	NA	NA	NA	NA	NA	NA	32	0.0122835	0.652256	NA	NA	NA
GO:0051764~actin crosslink formation	NA	NA	NA	NA	NA	NA	6	0.000663197	0.488883	NA	NA	NA	NA	NA	NA	NA	NA	NA	NA	NA	NA	NA	NA	NA	NA	NA	NA	NA	NA	NA
GO:0006937~regulation of muscle contraction	NA	NA	NA	NA	NA	NA	7	0.000757773	0.437396	NA	NA	NA	6	0.0108106	0.953677	NA	NA	NA	NA	NA	NA	NA	NA	NA	7	0.00371974	1	NA	NA	NA
GO:0005102~receptor binding	NA	NA	NA	NA	NA	NA	36	0.0022109	0.507142	NA	NA	NA	NA	NA	NA	NA	NA	NA	NA	NA	NA	NA	NA	NA	38	0.0323005	1	NA	NA	NA
GO:0005861~troponin complex	NA	NA	NA	NA	NA	NA	4	0.00257171	0.158773	NA	NA	NA	4	0.0069947	0.323444	NA	NA	NA	NA	NA	NA	NA	NA	NA	4	0.0101639	0.652256	NA	NA	NA
GO:0030057~desmosome	NA	NA	NA	NA	NA	NA	6	0.00388596	0.204469	NA	NA	NA	7	0.00103203	0.15839	NA	NA	NA	NA	NA	NA	NA	NA	NA	7	0.0020643	0.217551	NA	NA	NA
GO:0055010~ventricular cardiac muscle tissue morphogenesis	NA	NA	NA	NA	NA	NA	7	0.00390888	0.907203	NA	NA	NA	NA	NA	NA	NA	NA	NA	NA	NA	NA	NA	NA	NA	NA	NA	NA	NA	NA	NA
GO:0048843~negative regulation of axon extension involved in axon guidance	NA	NA	NA	NA	NA	NA	7	0.00486099	0.914978	NA	NA	NA	8	0.00178725	0.60423	NA	NA	NA	NA	NA	NA	NA	NA	NA	8	0.00372739	1	NA	NA	NA
GO:0005887~integral component of plasma membrane	NA	NA	NA	NA	NA	NA	65	0.00530694	0.242611	55	0.0225046	0.278672	77	0.000886153	0.199149	59	0.0385744	0.393638	NA	NA	NA	NA	NA	NA	78	0.0146481	0.707103	79	0.0221925	0.305695
GO:0030864~cortical actin cytoskeleton	NA	NA	NA	NA	NA	NA	9	0.00544494	0.226331	NA	NA	NA	9	0.0113697	0.436103	NA	NA	NA	NA	NA	NA	NA	NA	NA	9	0.0237053	0.797611	NA	NA	NA
GO:0030317~sperm motility	NA	NA	NA	NA	NA	NA	9	0.00552532	0.909487	NA	NA	NA	8	0.0334843	0.99354	NA	NA	NA	NA	NA	NA	NA	NA	NA	9	0.0225152	1	NA	NA	NA
GO:0070997~neuron death	NA	NA	NA	NA	NA	NA	5	0.00608102	0.901138	NA	NA	NA	NA	NA	NA	NA	NA	NA	NA	NA	NA	NA	NA	NA	NA	NA	NA	NA	NA	NA
mmu04060:Cytokine-cytokine receptor interaction	NA	NA	NA	NA	NA	NA	16	0.00628927	0.782772	NA	NA	NA	NA	NA	NA	NA	NA	NA	NA	NA	NA	NA	NA	NA	NA	NA	NA	NA	NA	NA
GO:0045499~chemorepellent activity	NA	NA	NA	NA	NA	NA	7	0.00637888	0.78438	NA	NA	NA	8	0.00261214	0.490416	NA	NA	NA	NA	NA	NA	NA	NA	NA	8	0.00506071	1	NA	NA	NA
GO:0005230~extracellular ligand-gated ion channel activity	NA	NA	NA	NA	NA	NA	7	0.00637888	0.78438	NA	NA	NA	7	0.0116859	0.867326	NA	NA	NA	NA	NA	NA	NA	NA	NA	9	0.00107412	0.592376	NA	NA	NA
GO:0005923~bicellular tight junction	NA	NA	NA	NA	NA	NA	14	0.00643204	0.240968	NA	NA	NA	NA	NA	NA	NA	NA	NA	NA	NA	NA	NA	NA	NA	14	0.0412631	1	NA	NA	NA
GO:0003779~actin binding	NA	NA	NA	NA	NA	NA	33	0.00647199	0.712163	29	0.0115122	0.390431	NA	NA	NA	34	0.00336485	0.187305	NA	NA	NA	NA	NA	NA	NA	NA	NA	44	0.00235698	0.176393
GO:0002474~antigen processing and presentation of peptide antigen via MHC class I	NA	NA	NA	NA	NA	NA	6	0.00661265	0.893258	NA	NA	NA	NA	NA	NA	NA	NA	NA	NA	NA	NA	NA	NA	NA	6	0.018206	1	NA	NA	NA
GO:0095500~acetylcholine receptor signaling pathway	NA	NA	NA	NA	NA	NA	4	0.00820251	0.917893	NA	NA	NA	4	0.0113927	0.948625	NA	NA	NA	NA	NA	NA	NA	NA	NA	4	0.0162388	1	NA	NA	NA
GO:0032420~stereocilium	NA	NA	NA	NA	NA	NA	7	0.00863166	0.287903	NA	NA	NA	NA	NA	NA	NA	NA	NA	NA	NA	NA	NA	NA	NA	NA	NA	NA	NA	NA	NA
GO:0030215~semaphorin receptor binding	NA	NA	NA	NA	NA	NA	6	0.0109652	0.828346	NA	NA	NA	6	0.0183229	0.93437	NA	NA	NA	NA	NA	NA	NA	NA	NA	6	0.0290005	1	NA	NA	NA
GO:0008092~cytoskeletal protein binding	NA	NA	NA	NA	NA	NA	11	0.0118192	0.80385	NA	NA	NA	11	0.0264727	0.937094	NA	NA	NA	NA	NA	NA	NA	NA	NA	12	0.0232956	1	NA	NA	NA
GO:0005544~calcium-dependent phospholipid binding	NA	NA	NA	NA	NA	NA	8	0.0119207	0.762497	NA	NA	NA	NA	NA	NA	NA	NA	NA	NA	NA	NA	NA	NA	NA	NA	NA	NA	NA	NA	NA
GO:0005892~acetylcholine-gated channel complex	NA	NA	NA	NA	NA	NA	4	0.0123978	0.363028	NA	NA	NA	NA	NA	NA	NA	NA	NA	NA	NA	NA	NA	NA	NA	NA	NA	NA	NA	NA	NA
GO:0060084~synaptic transmission involved in micturition	NA	NA	NA	NA	NA	NA	3	0.012483	0.968754	NA	NA	NA	NA	NA	NA	NA	NA	NA	NA	NA	NA	NA	NA	NA	NA	NA	NA	NA	NA	NA
GO:0055091~phospholipid homeostasis	NA	NA	NA	NA	NA	NA	4	0.0124855	0.958317	NA	NA	NA	NA	NA	NA	NA	NA	NA	NA	NA	NA	NA	NA	NA	4	0.0243699	1	NA	NA	NA
GO:0004889~acetylcholine-activated cation-selective channel activity	NA	NA	NA	NA	NA	NA	4	0.0129611	0.75095	NA	NA	NA	NA	NA	NA	NA	NA	NA	NA	NA	NA	NA	NA	NA	NA	NA	NA	NA	NA	NA
GO:0031012~extracellular matrix	NA	NA	NA	NA	NA	NA	26	0.0145986	0.389642	NA	NA	NA	NA	NA	NA	NA	NA	NA	NA	NA	NA	NA	NA	NA	NA	NA	NA	NA	NA	NA
GO:0031941~filamentous actin	NA	NA	NA	NA	NA	NA	7	0.0166065	0.40827	NA	NA	NA	NA	NA	NA	NA	NA	NA	NA	NA	NA	NA	NA	NA	NA	NA	NA	NA	NA	NA
GO:0008013~beta-catenin binding	NA	NA	NA	NA	NA	NA	12	0.0170928	0.808596	NA	NA	NA	12	0.0389084	0.922482	NA	NA	NA	NA	NA	NA	NA	NA	NA	NA	NA	NA	NA	NA	NA
GO:0032421~stereocilium bundle	NA	NA	NA	NA	NA	NA	4	0.0176973	0.408156	NA	NA	NA	NA	NA	NA	NA	NA	NA	NA	NA	NA	NA	NA	NA	NA	NA	NA	NA	NA	NA
GO:0035095~behavioral response to nicotine	NA	NA	NA	NA	NA	NA	4	0.0178202	0.984972	NA	NA	NA	NA	NA	NA	NA	NA	NA	NA	NA	NA	NA	NA	NA	NA	NA	NA	NA	NA	NA
GO:0050919~negative chemotaxis	NA	NA	NA	NA	NA	NA	6	0.0183929	0.982127	NA	NA	NA	8	0.00137377	0.656474	NA	NA	NA	NA	NA	NA	NA	NA	NA	8	0.00289132	1	NA	NA	NA
GO:0030001~metal ion transport	NA	NA	NA	NA	NA	NA	6	0.0183929	0.982127	NA	NA	NA	NA	NA	NA	NA	NA	NA	NA	NA	NA	NA	NA	NA	NA	NA	NA	NA	NA	NA
GO:0042166~acetylcholine binding	NA	NA	NA	NA	NA	NA	4	0.0184864	0.803435	NA	NA	NA	NA	NA	NA	NA	NA	NA	NA	NA	NA	NA	NA	NA	NA	NA	NA	NA	NA	NA
GO:0005216~ion channel activity	NA	NA	NA	NA	NA	NA	17	0.0193829	0.790751	23	1.37186e-05	0.00584759	22	0.00201112	0.645758	27	1.52717e-06	0.000469749	NA	NA	NA	NA	NA	NA	23	0.00261865	0.96279	32	1.3193e-06	0.000481543
GO:0005912~adherens junction	NA	NA	NA	NA	NA	NA	9	0.021679	0.454445	NA	NA	NA	9	0.0416293	0.655321	NA	NA	NA	NA	NA	NA	NA	NA	NA	NA	NA	NA	NA	NA	NA
GO:0006814~sodium ion transport	NA	NA	NA	NA	NA	NA	12	0.0218158	0.988471	NA	NA	NA	NA	NA	NA	NA	NA	NA	NA	NA	NA	NA	NA	NA	NA	NA	NA	NA	NA	NA
GO:0004222~metalloendopeptidase activity	NA	NA	NA	NA	NA	NA	12	0.0219953	0.806154	NA	NA	NA	NA	NA	NA	NA	NA	NA	NA	NA	NA	NA	NA	NA	NA	NA	NA	NA	NA	NA
GO:0071526~semaphorin-plexin signaling pathway	NA	NA	NA	NA	NA	NA	7	0.0222996	0.986127	NA	NA	NA	10	0.000636893	0.628559	NA	NA	NA	NA	NA	NA	NA	NA	NA	10	0.00160017	1	NA	NA	NA
GO:0030276~clathrin binding	NA	NA	NA	NA	NA	NA	8	0.0228207	0.794299	NA	NA	NA	NA	NA	NA	NA	NA	NA	NA	NA	NA	NA	NA	NA	NA	NA	NA	NA	NA	NA
GO:0005200~structural constituent of cytoskeleton	NA	NA	NA	NA	NA	NA	10	0.0235421	0.781971	10	0.0110079	0.392318	NA	NA	NA	NA	NA	NA	NA	NA	NA	NA	NA	NA	NA	NA	NA	NA	NA	NA
GO:0006813~potassium ion transport	NA	NA	NA	NA	NA	NA	14	0.0236884	0.986157	18	0.000133066	0.0339142	NA	NA	NA	22	4.36879e-06	0.00267188	NA	NA	NA	NA	NA	NA	NA	NA	NA	24	5.39355e-05	0.0139153
GO:0071896~protein localization to adherens junction	NA	NA	NA	NA	NA	NA	3	0.0238761	0.983001	NA	NA	NA	3	0.0298901	0.994707	NA	NA	NA	NA	NA	NA	NA	NA	NA	3	0.0381234	1	NA	NA	NA
GO:0030091~protein repair	NA	NA	NA	NA	NA	NA	3	0.0238761	0.983001	NA	NA	NA	NA	NA	NA	NA	NA	NA	NA	NA	NA	NA	NA	NA	3	0.0381234	1	NA	NA	NA
GO:0001527~microfibril	NA	NA	NA	NA	NA	NA	4	0.0240635	0.470599	NA	NA	NA	NA	NA	NA	NA	NA	NA	NA	NA	NA	NA	NA	NA	NA	NA	NA	NA	NA	NA
GO:0042989~sequestering of actin monomers	NA	NA	NA	NA	NA	NA	4	0.0242278	0.980114	NA	NA	NA	NA	NA	NA	NA	NA	NA	NA	NA	NA	NA	NA	NA	NA	NA	NA	NA	NA	NA
GO:0033743~peptide-methionine (R)-S-oxide reductase activity	NA	NA	NA	NA	NA	NA	3	0.0245058	0.773976	NA	NA	NA	NA	NA	NA	NA	NA	NA	NA	NA	NA	NA	NA	NA	3	0.0389999	1	NA	NA	NA
GO:0015464~acetylcholine receptor activity	NA	NA	NA	NA	NA	NA	4	0.0251165	0.761876	NA	NA	NA	NA	NA	NA	NA	NA	NA	NA	NA	NA	NA	NA	NA	NA	NA	NA	NA	NA	NA
GO:0016671~oxidoreductase activity, acting on a sulfur group of donors, disulfide as acceptor	NA	NA	NA	NA	NA	NA	4	0.0251165	0.761876	NA	NA	NA	NA	NA	NA	NA	NA	NA	NA	NA	NA	NA	NA	NA	4	0.0474176	1	NA	NA	NA
mmu04630:Jak-STAT signaling pathway	NA	NA	NA	NA	NA	NA	12	0.0264369	0.960911	NA	NA	NA	NA	NA	NA	NA	NA	NA	NA	NA	NA	NA	NA	NA	13	0.0459655	1	NA	NA	NA
GO:0007268~chemical synaptic transmission	NA	NA	NA	NA	NA	NA	16	0.0274082	0.985261	20	0.000210637	0.0420066	17	0.0398275	0.99483	20	0.0010529	0.14895	NA	NA	NA	NA	NA	NA	NA	NA	NA	26	0.000254619	0.0437945
GO:0048255~mRNA stabilization	NA	NA	NA	NA	NA	NA	5	0.0274157	0.982003	NA	NA	NA	5	0.0400194	0.993775	NA	NA	NA	NA	NA	NA	NA	NA	NA	NA	NA	NA	NA	NA	NA
mmu05200:Pathways in cancer	NA	NA	NA	NA	NA	NA	33	0.0281703	0.900244	NA	NA	NA	34	0.0466663	0.774057	NA	NA	NA	NA	NA	NA	NA	NA	NA	NA	NA	NA	NA	NA	NA
GO:0048485~sympathetic nervous system development	NA	NA	NA	NA	NA	NA	4	0.0317101	0.988268	NA	NA	NA	5	0.00653614	0.921797	NA	NA	NA	NA	NA	NA	NA	NA	NA	5	0.0103098	1	NA	NA	NA
GO:0008037~cell recognition	NA	NA	NA	NA	NA	NA	4	0.0317101	0.988268	NA	NA	NA	NA	NA	NA	NA	NA	NA	NA	NA	NA	NA	NA	NA	NA	NA	NA	NA	NA	NA
GO:0050839~cell adhesion molecule binding	NA	NA	NA	NA	NA	NA	9	0.0317981	0.821229	NA	NA	NA	NA	NA	NA	NA	NA	NA	NA	NA	NA	NA	NA	NA	NA	NA	NA	NA	NA	NA
GO:0005811~lipid particle	NA	NA	NA	NA	NA	NA	9	0.0321551	0.554467	NA	NA	NA	NA	NA	NA	NA	NA	NA	NA	NA	NA	NA	NA	NA	11	0.021126	0.797611	NA	NA	NA
mmu04726:Serotonergic synapse	NA	NA	NA	NA	NA	NA	12	0.0327396	0.866533	NA	NA	NA	15	0.00412453	0.290393	NA	NA	NA	NA	NA	NA	NA	NA	NA	14	0.0300416	1	NA	NA	NA
GO:0007271~synaptic transmission, cholinergic	NA	NA	NA	NA	NA	NA	5	0.0329631	0.988002	NA	NA	NA	NA	NA	NA	NA	NA	NA	NA	NA	NA	NA	NA	NA	NA	NA	NA	6	0.022405	0.90929
GO:0045202~synapse	NA	NA	NA	NA	NA	NA	42	0.0374528	0.592228	78	3.3852e-17	1.79754e-14	46	0.0476865	0.624378	77	4.84527e-14	2.83173e-11	NA	NA	NA	NA	NA	NA	NA	NA	NA	101	1.56497e-17	5.36004e-15
GO:0002934~desmosome organization	NA	NA	NA	NA	NA	NA	3	0.0380664	0.992611	NA	NA	NA	NA	NA	NA	NA	NA	NA	NA	NA	NA	NA	NA	NA	NA	NA	NA	NA	NA	NA
GO:0030550~acetylcholine receptor inhibitor activity	NA	NA	NA	NA	NA	NA	3	0.0390463	0.866054	NA	NA	NA	3	0.0494421	0.945215	NA	NA	NA	NA	NA	NA	NA	NA	NA	NA	NA	NA	NA	NA	NA
mmu04080:Neuroactive ligand-receptor interaction	NA	NA	NA	NA	NA	NA	19	0.0434561	0.883556	26	2.32332e-05	0.00136983	NA	NA	NA	27	0.000154559	0.00373363	NA	NA	NA	NA	NA	NA	NA	NA	NA	39	8.76048e-07	7.44641e-05
GO:0051497~negative regulation of stress fiber assembly	NA	NA	NA	NA	NA	NA	5	0.0458813	0.99666	NA	NA	NA	NA	NA	NA	NA	NA	NA	NA	NA	NA	NA	NA	NA	NA	NA	NA	NA	NA	NA
GO:0006094~gluconeogenesis	NA	NA	NA	NA	NA	NA	5	0.0458813	0.99666	NA	NA	NA	NA	NA	NA	NA	NA	NA	NA	NA	NA	NA	NA	NA	NA	NA	NA	NA	NA	NA
GO:0045121~membrane raft	NA	NA	NA	NA	NA	NA	23	0.0459727	0.65122	23	0.0136601	0.204062	30	0.00332516	0.283757	23	0.0388363	0.389224	NA	NA	NA	NA	NA	NA	30	0.0182375	0.797611	NA	NA	NA
GO:0005543~phospholipid binding	NA	NA	NA	NA	NA	NA	10	0.0463542	0.89729	NA	NA	NA	NA	NA	NA	NA	NA	NA	NA	NA	NA	NA	NA	NA	NA	NA	NA	NA	NA	NA
mmu04612:Antigen processing and presentation	NA	NA	NA	NA	NA	NA	8	0.048851	0.867355	NA	NA	NA	NA	NA	NA	NA	NA	NA	NA	NA	NA	NA	NA	NA	NA	NA	NA	NA	NA	NA
GO:0045667~regulation of osteoblast differentiation	NA	NA	NA	NA	NA	NA	4	0.0498298	0.997437	NA	NA	NA	NA	NA	NA	NA	NA	NA	NA	NA	NA	NA	NA	NA	NA	NA	NA	NA	NA	NA
GO:0045211~postsynaptic membrane	NA	NA	NA	NA	NA	NA	NA	NA	NA	43	4.30295e-13	5.71253e-11	NA	NA	NA	41	1.993e-10	1.94318e-08	NA	NA	NA	NA	NA	NA	NA	NA	NA	56	1.68773e-14	2.31219e-12
GO:0014069~postsynaptic density	NA	NA	NA	NA	NA	NA	NA	NA	NA	46	1.26296e-12	1.34129e-10	NA	NA	NA	49	8.61803e-13	1.68042e-10	NA	NA	NA	NA	NA	NA	NA	NA	NA	69	3.40997e-19	2.33583e-16
GO:0030425~dendrite	NA	NA	NA	NA	NA	NA	NA	NA	NA	66	1.50876e-12	1.33528e-10	NA	NA	NA	64	1.52798e-09	9.93188e-08	NA	NA	NA	NA	NA	NA	NA	NA	NA	94	3.22926e-16	7.37349e-14
GO:0030424~axon	NA	NA	NA	NA	NA	NA	NA	NA	NA	50	4.82829e-09	3.20478e-07	NA	NA	NA	51	5.17811e-08	3.02919e-06	NA	NA	NA	NA	NA	NA	NA	NA	NA	68	3.8482e-10	2.92891e-08
GO:0008076~voltage-gated potassium channel complex	NA	NA	NA	NA	NA	NA	NA	NA	NA	20	1.03854e-08	6.1274e-07	NA	NA	NA	23	3.11268e-10	2.60131e-08	NA	NA	NA	NA	NA	NA	NA	NA	NA	23	7.28265e-08	4.15718e-06
GO:0016020~membrane	NA	NA	NA	NA	NA	NA	NA	NA	NA	403	1.24187e-07	6.59433e-06	454	0.0424155	0.644418	442	2.35351e-07	1.25163e-05	NA	NA	NA	NA	NA	NA	NA	NA	NA	594	1.99815e-08	1.2443e-06
GO:0043197~dendritic spine	NA	NA	NA	NA	NA	NA	NA	NA	NA	27	1.36725e-07	6.60008e-06	NA	NA	NA	37	5.07503e-13	1.48439e-10	NA	NA	NA	NA	NA	NA	NA	NA	NA	45	3.10884e-14	3.54926e-12
GO:0005249~voltage-gated potassium channel activity	NA	NA	NA	NA	NA	NA	NA	NA	NA	16	1.07377e-06	0.000917655	NA	NA	NA	17	1.19469e-06	0.0011021	NA	NA	NA	NA	NA	NA	NA	NA	NA	18	1.29207e-05	0.00353703
mmu04020:Calcium signaling pathway	NA	NA	NA	NA	NA	NA	NA	NA	NA	26	1.61934e-06	0.000382092	NA	NA	NA	29	8.28969e-07	0.00020059	NA	NA	NA	NA	NA	NA	NA	NA	NA	36	3.98567e-07	5.08172e-05
GO:0019228~neuronal action potential	NA	NA	NA	NA	NA	NA	NA	NA	NA	11	2.03035e-06	0.00577382	NA	NA	NA	13	9.77528e-08	0.000299274	NA	NA	NA	NA	NA	NA	NA	NA	NA	14	1.26188e-07	9.11583e-05
GO:0060291~long-term synaptic potentiation	NA	NA	NA	NA	NA	NA	NA	NA	NA	14	2.18082e-06	0.00310503	NA	NA	NA	14	7.74902e-06	0.00338392	NA	NA	NA	NA	NA	NA	NA	NA	NA	19	4.04789e-08	7.31049e-05
mmu04713:Circadian entrainment	NA	NA	NA	NA	NA	NA	NA	NA	NA	18	3.44602e-06	0.000406549	13	0.0138302	0.500203	19	7.51974e-06	0.00036389	NA	NA	NA	NA	NA	NA	NA	NA	NA	21	7.56004e-05	0.00192781
GO:0043005~neuron projection	NA	NA	NA	NA	NA	NA	NA	NA	NA	46	7.1921e-06	0.000318201	NA	NA	NA	45	0.000188183	0.00685747	NA	NA	NA	NA	NA	NA	NA	NA	NA	66	2.73596e-07	1.33867e-05
GO:0086010~membrane depolarization during action potential	NA	NA	NA	NA	NA	NA	NA	NA	NA	9	1.89225e-05	0.0178283	NA	NA	NA	8	0.000467673	0.0910724	NA	NA	NA	NA	NA	NA	NA	NA	NA	8	0.00224427	0.219089
mmu04720:Long-term potentiation	NA	NA	NA	NA	NA	NA	NA	NA	NA	14	2.142e-05	0.00168364	NA	NA	NA	17	1.03996e-06	0.000125828	NA	NA	NA	NA	NA	NA	NA	NA	NA	21	2.32011e-07	5.08172e-05
GO:0034765~regulation of ion transmembrane transport	NA	NA	NA	NA	NA	NA	NA	NA	NA	20	2.42985e-05	0.0171758	15	0.0454814	0.995299	25	2.80814e-07	0.000429834	NA	NA	NA	NA	NA	NA	NA	NA	NA	30	1.19483e-07	9.11583e-05
GO:0071805~potassium ion transmembrane transport	NA	NA	NA	NA	NA	NA	NA	NA	NA	16	2.49965e-05	0.014157	NA	NA	NA	18	6.83101e-06	0.00348003	NA	NA	NA	NA	NA	NA	NA	NA	NA	19	9.20552e-05	0.019559
GO:0005244~voltage-gated ion channel activity	NA	NA	NA	NA	NA	NA	NA	NA	NA	20	2.64772e-05	0.0075177	NA	NA	NA	24	1.38126e-06	0.000637251	NA	NA	NA	NA	NA	NA	NA	NA	NA	29	5.91378e-07	0.000323779
GO:0050885~neuromuscular process controlling balance	NA	NA	NA	NA	NA	NA	NA	NA	NA	13	3.16294e-05	0.0149223	NA	NA	NA	11	0.00166488	0.198949	NA	NA	NA	NA	NA	NA	NA	NA	NA	17	6.64447e-06	0.00256328
GO:0007612~learning	NA	NA	NA	NA	NA	NA	NA	NA	NA	14	6.28419e-05	0.0252794	NA	NA	NA	15	4.88845e-05	0.0148573	NA	NA	NA	NA	NA	NA	NA	NA	NA	22	7.16358e-08	8.62495e-05
GO:0007165~signal transduction	NA	NA	NA	NA	NA	NA	NA	NA	NA	72	6.28437e-05	0.0221554	75	0.0130239	0.945591	63	0.0491117	0.865013	NA	NA	NA	NA	NA	NA	89	0.00197163	1	92	0.00291804	0.256412
GO:0048167~regulation of synaptic plasticity	NA	NA	NA	NA	NA	NA	NA	NA	NA	11	0.000108666	0.0305179	NA	NA	NA	9	0.00505265	0.393673	NA	NA	NA	NA	NA	NA	NA	NA	NA	17	2.51102e-07	0.000151163
GO:0043195~terminal bouton	NA	NA	NA	NA	NA	NA	NA	NA	NA	17	0.00012281	0.00500407	NA	NA	NA	14	0.0086602	0.142891	NA	NA	NA	NA	NA	NA	NA	NA	NA	20	0.000633899	0.0206206
GO:0007626~locomotory behavior	NA	NA	NA	NA	NA	NA	NA	NA	NA	16	0.000166442	0.0387886	NA	NA	NA	20	3.38859e-06	0.00259061	NA	NA	NA	NA	NA	NA	NA	NA	NA	27	3.11779e-08	7.31049e-05
GO:0042734~presynaptic membrane	NA	NA	NA	NA	NA	NA	NA	NA	NA	14	0.000171756	0.00649383	NA	NA	NA	14	0.000477467	0.0154016	NA	NA	NA	NA	NA	NA	NA	NA	NA	18	9.25825e-05	0.00373053
GO:0019233~sensory perception of pain	NA	NA	NA	NA	NA	NA	NA	NA	NA	13	0.000194239	0.0417219	10	0.0458659	0.993484	13	0.00075091	0.126549	NA	NA	NA	NA	NA	NA	12	0.0138371	1	17	7.47571e-05	0.0168764
GO:0048168~regulation of neuronal synaptic plasticity	NA	NA	NA	NA	NA	NA	NA	NA	NA	8	0.000230804	0.0429394	NA	NA	NA	6	0.0144836	0.590764	NA	NA	NA	NA	NA	NA	NA	NA	NA	8	0.00298153	0.256412
GO:0007616~long-term memory	NA	NA	NA	NA	NA	NA	NA	NA	NA	9	0.000371247	0.0640443	NA	NA	NA	10	0.000143205	0.0331702	NA	NA	NA	NA	NA	NA	NA	NA	NA	10	0.0014503	0.168983
GO:0030534~adult behavior	NA	NA	NA	NA	NA	NA	NA	NA	NA	9	0.000465467	0.0751346	NA	NA	NA	11	2.9982e-05	0.0101489	NA	NA	NA	NA	NA	NA	NA	NA	NA	13	1.41506e-05	0.00425933
GO:0050808~synapse organization	NA	NA	NA	NA	NA	NA	NA	NA	NA	9	0.000465467	0.0751346	NA	NA	NA	7	0.018162	0.639558	NA	NA	NA	NA	NA	NA	NA	NA	NA	9	0.00711557	0.443128
mmu04723:Retrograde endocannabinoid signaling	NA	NA	NA	NA	NA	NA	NA	NA	NA	15	0.000479185	0.022369	12	0.049387	0.753715	18	7.35375e-05	0.00222212	NA	NA	NA	NA	NA	NA	NA	NA	NA	22	6.72115e-05	0.00190432
mmu04724:Glutamatergic synapse	NA	NA	NA	NA	NA	NA	NA	NA	NA	16	0.000546942	0.021289	15	0.0111252	0.501636	19	0.000110391	0.00296406	NA	NA	NA	NA	NA	NA	NA	NA	NA	24	5.18671e-05	0.00165326
GO:0030426~growth cone	NA	NA	NA	NA	NA	NA	NA	NA	NA	21	0.000561177	0.0184568	NA	NA	NA	20	0.00459098	0.0886465	NA	NA	NA	NA	NA	NA	NA	NA	NA	26	0.00188189	0.0477442
GO:0043194~axon initial segment	NA	NA	NA	NA	NA	NA	NA	NA	NA	6	0.000572155	0.0177177	NA	NA	NA	7	8.29377e-05	0.00372539	NA	NA	NA	NA	NA	NA	NA	NA	NA	6	0.00374027	0.077639
mmu04970:Salivary secretion	NA	NA	NA	NA	NA	NA	NA	NA	NA	12	0.000589466	0.019683	NA	NA	NA	13	0.000545576	0.0101074	NA	NA	NA	NA	NA	NA	NA	NA	NA	13	0.0112602	0.0957116
GO:0031402~sodium ion binding	NA	NA	NA	NA	NA	NA	NA	NA	NA	6	0.000603946	0.121143	NA	NA	NA	7	9.75942e-05	0.0178554	NA	NA	NA	NA	NA	NA	NA	NA	NA	6	0.00433781	0.237495
GO:0044325~ion channel binding	NA	NA	NA	NA	NA	NA	NA	NA	NA	17	0.000757277	0.121504	NA	NA	NA	20	0.000174744	0.0265256	NA	NA	NA	NA	NA	NA	NA	NA	NA	24	0.000143258	0.0313735
mmu04912:GnRH signaling pathway	NA	NA	NA	NA	NA	NA	NA	NA	NA	13	0.000762508	0.0222513	NA	NA	NA	14	0.00110847	0.0156642	NA	NA	NA	NA	NA	NA	NA	NA	NA	18	0.000359819	0.00611692
GO:0007155~cell adhesion	NA	NA	NA	NA	NA	NA	NA	NA	NA	40	0.00105159	0.153552	NA	NA	NA	NA	NA	NA	NA	NA	NA	NA	NA	NA	NA	NA	NA	NA	NA	NA
GO:0043679~axon terminus	NA	NA	NA	NA	NA	NA	NA	NA	NA	13	0.00108229	0.03144	NA	NA	NA	15	0.000277086	0.00949101	NA	NA	NA	NA	NA	NA	NA	NA	NA	18	0.000192381	0.00693585
GO:0030117~membrane coat	NA	NA	NA	NA	NA	NA	NA	NA	NA	8	0.00111006	0.0305638	NA	NA	NA	7	0.00943844	0.142816	NA	NA	NA	NA	NA	NA	NA	NA	NA	9	0.00286741	0.0633605
GO:0033268~node of Ranvier	NA	NA	NA	NA	NA	NA	NA	NA	NA	6	0.00121095	0.0316583	NA	NA	NA	7	0.000137219	0.0053376	NA	NA	NA	NA	NA	NA	NA	NA	NA	7	0.000753055	0.0214934
mmu04261:Adrenergic signaling in cardiomyocytes	NA	NA	NA	NA	NA	NA	NA	NA	NA	17	0.00125077	0.0322859	NA	NA	NA	24	4.25026e-06	0.000257108	NA	NA	NA	NA	NA	NA	NA	NA	NA	29	5.22067e-06	0.000332818
mmu04925:Aldosterone synthesis and secretion	NA	NA	NA	NA	NA	NA	NA	NA	NA	12	0.00146435	0.0339928	NA	NA	NA	14	0.000491948	0.0107671	NA	NA	NA	NA	NA	NA	NA	NA	NA	17	0.00048264	0.0072396
GO:0005267~potassium channel activity	NA	NA	NA	NA	NA	NA	NA	NA	NA	12	0.00150384	0.193022	NA	NA	NA	14	0.000345861	0.0445876	NA	NA	NA	NA	NA	NA	NA	NA	NA	15	0.00217985	0.176393
mmu04725:Cholinergic synapse	NA	NA	NA	NA	NA	NA	NA	NA	NA	15	0.00150749	0.0318486	NA	NA	NA	15	0.00719496	0.0702239	NA	NA	NA	NA	NA	NA	NA	NA	NA	23	0.000130448	0.00277202
GO:0043204~perikaryon	NA	NA	NA	NA	NA	NA	NA	NA	NA	18	0.00153549	0.0381107	NA	NA	NA	23	4.06298e-05	0.00197878	NA	NA	NA	NA	NA	NA	NA	NA	NA	34	1.78954e-08	1.22584e-06
GO:0008021~synaptic vesicle	NA	NA	NA	NA	NA	NA	NA	NA	NA	17	0.00156823	0.0371726	NA	NA	NA	14	0.0435568	0.418856	NA	NA	NA	NA	NA	NA	NA	NA	NA	19	0.0178477	0.265775
GO:0008306~associative learning	NA	NA	NA	NA	NA	NA	NA	NA	NA	8	0.00165041	0.219593	NA	NA	NA	8	0.00384672	0.354085	NA	NA	NA	NA	NA	NA	NA	NA	NA	11	0.000171938	0.0339166
GO:0005516~calmodulin binding	NA	NA	NA	NA	NA	NA	NA	NA	NA	21	0.00166491	0.184151	NA	NA	NA	26	7.34619e-05	0.0168091	NA	NA	NA	NA	NA	NA	NA	NA	NA	37	5.89295e-07	0.000323779
GO:0042995~cell projection	NA	NA	NA	NA	NA	NA	NA	NA	NA	57	0.0016677	0.0378013	68	0.00384482	0.214352	63	0.00115141	0.0301701	NA	NA	NA	NA	NA	NA	77	0.0024582	0.217551	89	2.39965e-05	0.00109584
GO:0086005~ventricular cardiac muscle cell action potential	NA	NA	NA	NA	NA	NA	NA	NA	NA	5	0.00177339	0.223617	NA	NA	NA	NA	NA	NA	NA	NA	NA	NA	NA	NA	NA	NA	NA	NA	NA	NA
GO:1900454~positive regulation of long term synaptic depression	NA	NA	NA	NA	NA	NA	NA	NA	NA	4	0.00177507	0.214383	NA	NA	NA	3	0.0370215	0.826256	NA	NA	NA	NA	NA	NA	NA	NA	NA	4	0.00613485	0.407632
GO:0051015~actin filament binding	NA	NA	NA	NA	NA	NA	NA	NA	NA	17	0.00192324	0.185958	NA	NA	NA	19	0.00104278	0.101473	NA	NA	NA	NA	NA	NA	NA	NA	NA	23	0.00129361	0.15739
GO:0046426~negative regulation of JAK-STAT cascade	NA	NA	NA	NA	NA	NA	NA	NA	NA	8	0.00200857	0.229446	NA	NA	NA	7	0.0134765	0.586851	NA	NA	NA	NA	NA	NA	NA	NA	NA	9	0.00473987	0.371504
GO:0031594~neuromuscular junction	NA	NA	NA	NA	NA	NA	NA	NA	NA	11	0.00223622	0.048325	NA	NA	NA	NA	NA	NA	NA	NA	NA	NA	NA	NA	NA	NA	NA	11	0.0359804	0.465029
GO:0042391~regulation of membrane potential	NA	NA	NA	NA	NA	NA	NA	NA	NA	13	0.00232369	0.250593	NA	NA	NA	18	1.39894e-05	0.00534018	NA	NA	NA	NA	NA	NA	NA	NA	NA	19	0.000218977	0.0395472
GO:0006469~negative regulation of protein kinase activity	NA	NA	NA	NA	NA	NA	NA	NA	NA	13	0.00232369	0.250593	NA	NA	NA	12	0.0140821	0.587799	NA	NA	NA	NA	NA	NA	NA	NA	NA	18	0.000565098	0.0927788
GO:0030506~ankyrin binding	NA	NA	NA	NA	NA	NA	NA	NA	NA	6	0.00238449	0.202918	NA	NA	NA	6	0.00407024	0.209651	NA	NA	NA	NA	NA	NA	NA	NA	NA	6	0.0153335	0.559674
GO:0035556~intracellular signal transduction	NA	NA	NA	NA	NA	NA	NA	NA	NA	35	0.00239895	0.248299	39	0.0120811	0.945352	41	0.000374815	0.0787214	NA	NA	NA	NA	NA	NA	NA	NA	NA	57	1.1403e-05	0.00374434
GO:0005776~autophagosome	NA	NA	NA	NA	NA	NA	NA	NA	NA	11	0.00253839	0.0525527	NA	NA	NA	12	0.00163973	0.0408813	NA	NA	NA	NA	NA	NA	NA	NA	NA	13	0.00634229	0.124128
GO:0043198~dendritic shaft	NA	NA	NA	NA	NA	NA	NA	NA	NA	11	0.00253839	0.0525527	11	0.0142064	0.449744	14	0.000113272	0.00472224	NA	NA	NA	NA	NA	NA	NA	NA	NA	21	1.29809e-07	6.83995e-06
GO:0086091~regulation of heart rate by cardiac conduction	NA	NA	NA	NA	NA	NA	NA	NA	NA	7	0.00254325	0.252113	NA	NA	NA	NA	NA	NA	NA	NA	NA	NA	NA	NA	NA	NA	NA	9	0.00105008	0.14588
mmu05033:Nicotine addiction	NA	NA	NA	NA	NA	NA	NA	NA	NA	8	0.00264968	0.0508416	NA	NA	NA	9	0.00150437	0.0200371	NA	NA	NA	NA	NA	NA	NA	NA	NA	12	0.000196995	0.00386413
GO:0060307~regulation of ventricular cardiac muscle cell membrane repolarization	NA	NA	NA	NA	NA	NA	NA	NA	NA	5	0.00265976	0.253339	NA	NA	NA	4	0.0387493	0.822488	NA	NA	NA	NA	NA	NA	NA	NA	NA	5	0.0123847	0.630048
mmu04921:Oxytocin signaling pathway	NA	NA	NA	NA	NA	NA	NA	NA	NA	17	0.00282959	0.05014	NA	NA	NA	23	4.47219e-05	0.0018022	NA	NA	NA	NA	NA	NA	NA	NA	NA	30	8.63647e-06	0.00044046
mmu04730:Long-term depression	NA	NA	NA	NA	NA	NA	NA	NA	NA	10	0.00293936	0.048411	NA	NA	NA	9	0.0249918	0.18467	NA	NA	NA	NA	NA	NA	NA	NA	NA	11	0.0238767	0.173959
GO:0043209~myelin sheath	NA	NA	NA	NA	NA	NA	NA	NA	NA	22	0.00308833	0.0612169	NA	NA	NA	21	0.0192231	0.247139	NA	NA	NA	NA	NA	NA	NA	NA	NA	27	0.0143724	0.223752
GO:0006816~calcium ion transport	NA	NA	NA	NA	NA	NA	NA	NA	NA	16	0.00332952	0.296918	NA	NA	NA	21	6.8252e-05	0.0188202	NA	NA	NA	NA	NA	NA	NA	NA	NA	26	3.35989e-05	0.00933533
GO:0007613~memory	NA	NA	NA	NA	NA	NA	NA	NA	NA	12	0.00339063	0.29245	NA	NA	NA	14	0.000996711	0.148459	NA	NA	NA	NA	NA	NA	NA	NA	NA	15	0.00519232	0.382748
GO:0032092~positive regulation of protein binding	NA	NA	NA	NA	NA	NA	NA	NA	NA	11	0.00353956	0.294406	NA	NA	NA	11	0.007897	0.500235	NA	NA	NA	NA	NA	NA	NA	NA	NA	NA	NA	NA
mmu04022:cGMP-PKG signaling pathway	NA	NA	NA	NA	NA	NA	NA	NA	NA	17	0.0035427	0.0543071	NA	NA	NA	21	0.000505071	0.0101365	NA	NA	NA	NA	NA	NA	NA	NA	NA	28	0.000100684	0.00233403
GO:0008542~visual learning	NA	NA	NA	NA	NA	NA	NA	NA	NA	10	0.00404572	0.319817	NA	NA	NA	12	0.000702007	0.125754	NA	NA	NA	NA	NA	NA	NA	NA	NA	18	3.20452e-06	0.00165353
GO:0006897~endocytosis	NA	NA	NA	NA	NA	NA	NA	NA	NA	20	0.00422775	0.322792	NA	NA	NA	NA	NA	NA	NA	NA	NA	NA	NA	NA	NA	NA	NA	NA	NA	NA
mmu04961:Endocrine and other factor-regulated calcium reabsorption	NA	NA	NA	NA	NA	NA	NA	NA	NA	8	0.0043114	0.0617423	NA	NA	NA	7	0.0346885	0.222199	NA	NA	NA	NA	NA	NA	NA	NA	NA	9	0.0202846	0.161643
mmu04540:Gap junction	NA	NA	NA	NA	NA	NA	NA	NA	NA	12	0.00432794	0.0584354	NA	NA	NA	11	0.0341196	0.224757	NA	NA	NA	NA	NA	NA	NA	NA	NA	15	0.0135896	0.111786
GO:0005515~protein binding	NA	NA	NA	NA	NA	NA	NA	NA	NA	241	0.00486877	0.341174	NA	NA	NA	NA	NA	NA	NA	NA	NA	NA	NA	NA	NA	NA	NA	362	0.0051302	0.267503
GO:0019901~protein kinase binding	NA	NA	NA	NA	NA	NA	NA	NA	NA	38	0.00493445	0.319203	NA	NA	NA	44	0.00140955	0.111621	NA	NA	NA	NA	NA	NA	NA	NA	NA	60	0.000188462	0.0343943
mmu04070:Phosphatidylinositol signaling system	NA	NA	NA	NA	NA	NA	NA	NA	NA	13	0.00497462	0.0632938	NA	NA	NA	16	0.000889004	0.0142465	NA	NA	NA	NA	NA	NA	NA	NA	NA	21	0.000238012	0.00433521
GO:0017016~Ras GTPase binding	NA	NA	NA	NA	NA	NA	NA	NA	NA	6	0.00515792	0.308196	NA	NA	NA	NA	NA	NA	NA	NA	NA	NA	NA	NA	NA	NA	NA	7	0.00723285	0.344346
GO:0005905~clathrin-coated pit	NA	NA	NA	NA	NA	NA	NA	NA	NA	10	0.00530393	0.0993047	NA	NA	NA	9	0.0320734	0.345437	NA	NA	NA	NA	NA	NA	NA	NA	NA	NA	NA	NA
mmu04971:Gastric acid secretion	NA	NA	NA	NA	NA	NA	NA	NA	NA	10	0.00535984	0.0645746	NA	NA	NA	12	0.00169904	0.0214259	NA	NA	NA	NA	NA	NA	NA	NA	NA	13	0.00760658	0.0718399
GO:0004860~protein kinase inhibitor activity	NA	NA	NA	NA	NA	NA	NA	NA	NA	9	0.00565954	0.311528	NA	NA	NA	10	0.00289957	0.174233	NA	NA	NA	NA	NA	NA	NA	NA	NA	12	0.00234672	0.176393
GO:0005096~GTPase activator activity	NA	NA	NA	NA	NA	NA	NA	NA	NA	24	0.00593138	0.304634	NA	NA	NA	26	0.00606672	0.244845	NA	NA	NA	NA	NA	NA	NA	NA	NA	34	0.00323976	0.197085
GO:0048814~regulation of dendrite morphogenesis	NA	NA	NA	NA	NA	NA	NA	NA	NA	6	0.00603248	0.416828	NA	NA	NA	6	0.00975349	0.519051	NA	NA	NA	NA	NA	NA	NA	NA	NA	NA	NA	NA
GO:0005262~calcium channel activity	NA	NA	NA	NA	NA	NA	NA	NA	NA	11	0.00615488	0.296658	NA	NA	NA	13	0.00159688	0.107268	NA	NA	NA	NA	NA	NA	NA	NA	NA	15	0.00292335	0.188298
GO:0043547~positive regulation of GTPase activity	NA	NA	NA	NA	NA	NA	NA	NA	NA	15	0.00659607	0.435576	NA	NA	NA	17	0.00367164	0.35157	NA	NA	NA	NA	NA	NA	NA	NA	NA	22	0.00113583	0.151398
mmu04916:Melanogenesis	NA	NA	NA	NA	NA	NA	NA	NA	NA	12	0.00689081	0.078353	NA	NA	NA	15	0.00106144	0.0159344	NA	NA	NA	NA	NA	NA	NA	NA	NA	18	0.0016246	0.0197273
GO:1901379~regulation of potassium ion transmembrane transport	NA	NA	NA	NA	NA	NA	NA	NA	NA	5	0.00701872	0.446129	NA	NA	NA	5	0.0105053	0.520464	NA	NA	NA	NA	NA	NA	NA	NA	NA	5	0.0303036	1
GO:0035235~ionotropic glutamate receptor signaling pathway	NA	NA	NA	NA	NA	NA	NA	NA	NA	5	0.00701872	0.446129	NA	NA	NA	5	0.0105053	0.520464	NA	NA	NA	NA	NA	NA	NA	NA	NA	5	0.0303036	1
mmu04024:cAMP signaling pathway	NA	NA	NA	NA	NA	NA	NA	NA	NA	19	0.00702176	0.0761353	NA	NA	NA	22	0.00456984	0.0470501	NA	NA	NA	NA	NA	NA	NA	NA	NA	31	0.00045584	0.0072396
GO:0005770~late endosome	NA	NA	NA	NA	NA	NA	NA	NA	NA	16	0.00741064	0.131564	NA	NA	NA	NA	NA	NA	NA	NA	NA	NA	NA	NA	NA	NA	NA	NA	NA	NA
GO:0035254~glutamate receptor binding	NA	NA	NA	NA	NA	NA	NA	NA	NA	5	0.00742082	0.312446	NA	NA	NA	5	0.0113821	0.381384	NA	NA	NA	NA	NA	NA	NA	NA	NA	5	0.0329077	0.735386
mmu04740:Olfactory transduction	NA	NA	NA	NA	NA	NA	NA	NA	NA	6	0.00749876	0.0775705	NA	NA	NA	NA	NA	NA	NA	NA	NA	NA	NA	NA	NA	NA	NA	NA	NA	NA
GO:0007186~G-protein coupled receptor signaling pathway	NA	NA	NA	NA	NA	NA	NA	NA	NA	32	0.00777295	0.470519	NA	NA	NA	35	0.00862072	0.511549	NA	NA	NA	NA	NA	NA	39	0.0422344	1	44	0.0104984	0.586567
GO:0007399~nervous system development	NA	NA	NA	NA	NA	NA	NA	NA	NA	32	0.00777295	0.470519	NA	NA	NA	NA	NA	NA	NA	NA	NA	NA	NA	NA	NA	NA	NA	NA	NA	NA
GO:0048306~calcium-dependent protein binding	NA	NA	NA	NA	NA	NA	NA	NA	NA	10	0.00803611	0.318363	NA	NA	NA	10	0.0169995	0.431749	NA	NA	NA	NA	NA	NA	NA	NA	NA	14	0.00253923	0.176393
GO:0043083~synaptic cleft	NA	NA	NA	NA	NA	NA	NA	NA	NA	4	0.00881109	0.149601	NA	NA	NA	NA	NA	NA	NA	NA	NA	NA	NA	NA	NA	NA	NA	NA	NA	NA
GO:0072178~nephric duct morphogenesis	NA	NA	NA	NA	NA	NA	NA	NA	NA	3	0.00967581	0.537113	NA	NA	NA	NA	NA	NA	NA	NA	NA	NA	NA	NA	NA	NA	NA	NA	NA	NA
GO:0071320~cellular response to cAMP	NA	NA	NA	NA	NA	NA	NA	NA	NA	8	0.00974866	0.530048	NA	NA	NA	NA	NA	NA	NA	NA	NA	NA	NA	NA	NA	NA	NA	9	0.029754	1
mmu04721:Synaptic vesicle cycle	NA	NA	NA	NA	NA	NA	NA	NA	NA	9	0.0102069	0.0999181	NA	NA	NA	NA	NA	NA	NA	NA	NA	NA	NA	NA	NA	NA	NA	14	0.0011563	0.0163809
GO:0008277~regulation of G-protein coupled receptor protein signaling pathway	NA	NA	NA	NA	NA	NA	NA	NA	NA	7	0.010728	0.554926	NA	NA	NA	7	0.0156987	0.613264	NA	NA	NA	NA	NA	NA	NA	NA	NA	9	0.0058364	0.407632
GO:0072661~protein targeting to plasma membrane	NA	NA	NA	NA	NA	NA	NA	NA	NA	6	0.010914	0.551798	NA	NA	NA	NA	NA	NA	NA	NA	NA	NA	NA	NA	NA	NA	NA	NA	NA	NA
GO:0048511~rhythmic process	NA	NA	NA	NA	NA	NA	NA	NA	NA	15	0.0109428	0.543661	NA	NA	NA	16	0.0126498	0.571475	NA	NA	NA	NA	NA	NA	NA	NA	NA	22	0.00243384	0.225411
GO:0048013~ephrin receptor signaling pathway	NA	NA	NA	NA	NA	NA	NA	NA	NA	8	0.0110779	0.539245	NA	NA	NA	NA	NA	NA	NA	NA	NA	NA	NA	NA	NA	NA	NA	NA	NA	NA
GO:0032590~dendrite membrane	NA	NA	NA	NA	NA	NA	NA	NA	NA	6	0.0110934	0.179179	NA	NA	NA	8	0.000601675	0.0183602	NA	NA	NA	NA	NA	NA	NA	NA	NA	9	0.000731048	0.0214934
GO:0045956~positive regulation of calcium ion-dependent exocytosis	NA	NA	NA	NA	NA	NA	NA	NA	NA	5	0.0116354	0.548299	NA	NA	NA	NA	NA	NA	NA	NA	NA	NA	NA	NA	NA	NA	NA	NA	NA	NA
GO:0032279~asymmetric synapse	NA	NA	NA	NA	NA	NA	NA	NA	NA	5	0.0117955	0.183923	NA	NA	NA	6	0.00267324	0.0584506	NA	NA	NA	NA	NA	NA	NA	NA	NA	8	0.000229666	0.00786606
mmu00562:Inositol phosphate metabolism	NA	NA	NA	NA	NA	NA	NA	NA	NA	10	0.0121322	0.113106	NA	NA	NA	11	0.0120003	0.106287	NA	NA	NA	NA	NA	NA	NA	NA	NA	15	0.0030928	0.0342897
mmu04728:Dopaminergic synapse	NA	NA	NA	NA	NA	NA	NA	NA	NA	14	0.0123286	0.110509	NA	NA	NA	24	1.28715e-06	0.000103825	NA	NA	NA	NA	NA	NA	NA	NA	NA	27	1.54294e-05	0.000562072
mmu05010:Alzheimer's disease	NA	NA	NA	NA	NA	NA	NA	NA	NA	17	0.0129747	0.111784	NA	NA	NA	21	0.00302246	0.0342816	NA	NA	NA	NA	NA	NA	NA	NA	NA	NA	NA	NA
GO:0035176~social behavior	NA	NA	NA	NA	NA	NA	NA	NA	NA	8	0.0141223	0.610677	NA	NA	NA	NA	NA	NA	NA	NA	NA	NA	NA	NA	NA	NA	NA	9	0.0382167	1
GO:0051056~regulation of small GTPase mediated signal transduction	NA	NA	NA	NA	NA	NA	NA	NA	NA	5	0.0145312	0.612793	NA	NA	NA	5	0.0213848	0.693327	NA	NA	NA	NA	NA	NA	NA	NA	NA	NA	NA	NA
GO:0031175~neuron projection development	NA	NA	NA	NA	NA	NA	NA	NA	NA	15	0.0152259	0.621827	NA	NA	NA	NA	NA	NA	NA	NA	NA	NA	NA	NA	NA	NA	NA	NA	NA	NA
GO:0005198~structural molecule activity	NA	NA	NA	NA	NA	NA	NA	NA	NA	12	0.0163206	0.488273	NA	NA	NA	14	0.00526845	0.237283	NA	NA	NA	NA	NA	NA	NA	NA	NA	18	0.00257422	0.176393
GO:0072659~protein localization to plasma membrane	NA	NA	NA	NA	NA	NA	NA	NA	NA	9	0.016325	0.639586	NA	NA	NA	NA	NA	NA	NA	NA	NA	NA	NA	NA	NA	NA	NA	NA	NA	NA
GO:0005251~delayed rectifier potassium channel activity	NA	NA	NA	NA	NA	NA	NA	NA	NA	6	0.0163484	0.473029	NA	NA	NA	7	0.00754998	0.283301	NA	NA	NA	NA	NA	NA	NA	NA	NA	7	0.0268391	0.700608
GO:0060076~excitatory synapse	NA	NA	NA	NA	NA	NA	NA	NA	NA	7	0.0165919	0.236023	NA	NA	NA	NA	NA	NA	NA	NA	NA	NA	NA	NA	NA	NA	NA	12	0.0001831	0.00693585
GO:0006887~exocytosis	NA	NA	NA	NA	NA	NA	NA	NA	NA	12	0.0170868	0.648591	NA	NA	NA	NA	NA	NA	NA	NA	NA	NA	NA	NA	NA	NA	NA	17	0.00685605	0.434457
GO:0015813~L-glutamate transport	NA	NA	NA	NA	NA	NA	NA	NA	NA	4	0.0171184	0.641535	NA	NA	NA	NA	NA	NA	NA	NA	NA	NA	NA	NA	NA	NA	NA	NA	NA	NA
GO:0030141~secretory granule	NA	NA	NA	NA	NA	NA	NA	NA	NA	11	0.0172751	0.238263	NA	NA	NA	NA	NA	NA	NA	NA	NA	NA	NA	NA	NA	NA	NA	14	0.0223135	0.305695
GO:0007605~sensory perception of sound	NA	NA	NA	NA	NA	NA	NA	NA	NA	13	0.0182273	0.657228	NA	NA	NA	17	0.0013086	0.173811	NA	NA	NA	NA	NA	NA	NA	NA	NA	21	0.000856128	0.123693
GO:0032809~neuronal cell body membrane	NA	NA	NA	NA	NA	NA	NA	NA	NA	6	0.0182531	0.243826	NA	NA	NA	6	0.027424	0.314979	NA	NA	NA	NA	NA	NA	NA	NA	NA	9	0.00173808	0.0457916
mmu04972:Pancreatic secretion	NA	NA	NA	NA	NA	NA	NA	NA	NA	9	0.0185407	0.150902	NA	NA	NA	9	0.0468965	0.269593	NA	NA	NA	NA	NA	NA	NA	NA	NA	12	0.0220246	0.169198
GO:0014731~spectrin-associated cytoskeleton	NA	NA	NA	NA	NA	NA	NA	NA	NA	3	0.01875	0.243602	NA	NA	NA	3	0.022937	0.281855	NA	NA	NA	NA	NA	NA	NA	NA	NA	3	0.041398	0.472628
GO:0008091~spectrin	NA	NA	NA	NA	NA	NA	NA	NA	NA	3	0.01875	0.243602	NA	NA	NA	3	0.022937	0.281855	NA	NA	NA	NA	NA	NA	NA	NA	NA	3	0.041398	0.472628
GO:0004970~ionotropic glutamate receptor activity	NA	NA	NA	NA	NA	NA	NA	NA	NA	5	0.0188119	0.506372	NA	NA	NA	6	0.00533134	0.228704	NA	NA	NA	NA	NA	NA	NA	NA	NA	6	0.0196702	0.610597
GO:0005234~extracellular-glutamate-gated ion channel activity	NA	NA	NA	NA	NA	NA	NA	NA	NA	5	0.0188119	0.506372	NA	NA	NA	6	0.00533134	0.228704	NA	NA	NA	NA	NA	NA	NA	NA	NA	6	0.0196702	0.610597
GO:0030507~spectrin binding	NA	NA	NA	NA	NA	NA	NA	NA	NA	6	0.0191179	0.497255	NA	NA	NA	7	0.00754998	0.283301	NA	NA	NA	NA	NA	NA	NA	NA	NA	9	0.00164948	0.176393
GO:0006468~protein phosphorylation	NA	NA	NA	NA	NA	NA	NA	NA	NA	43	0.019556	0.675843	NA	NA	NA	49	0.010184	0.525868	NA	NA	NA	NA	NA	NA	NA	NA	NA	NA	NA	NA
mmu04114:Oocyte meiosis	NA	NA	NA	NA	NA	NA	NA	NA	NA	12	0.0205106	0.160268	NA	NA	NA	15	0.004211	0.045358	NA	NA	NA	NA	NA	NA	NA	NA	NA	19	0.00324272	0.0344539
GO:0004930~G-protein coupled receptor activity	NA	NA	NA	NA	NA	NA	NA	NA	NA	24	0.0205524	0.508461	NA	NA	NA	NA	NA	NA	NA	NA	NA	NA	NA	NA	NA	NA	NA	32	0.0426627	0.873616
GO:0045444~fat cell differentiation	NA	NA	NA	NA	NA	NA	NA	NA	NA	10	0.0209126	0.693294	NA	NA	NA	11	0.0160297	0.613859	NA	NA	NA	NA	NA	NA	NA	NA	NA	13	0.0198204	0.846677
GO:0007628~adult walking behavior	NA	NA	NA	NA	NA	NA	NA	NA	NA	7	0.0209523	0.68694	NA	NA	NA	8	0.0102815	0.52094	NA	NA	NA	NA	NA	NA	NA	NA	NA	10	0.00519157	0.382748
GO:0004674~protein serine/threonine kinase activity	NA	NA	NA	NA	NA	NA	NA	NA	NA	33	0.0213304	0.507879	NA	NA	NA	37	0.0161947	0.427734	NA	NA	NA	NA	NA	NA	NA	NA	NA	46	0.0308457	0.703668
GO:0048666~neuron development	NA	NA	NA	NA	NA	NA	NA	NA	NA	8	0.0219222	0.696625	NA	NA	NA	NA	NA	NA	NA	NA	NA	NA	NA	NA	NA	NA	NA	NA	NA	NA
GO:0009968~negative regulation of signal transduction	NA	NA	NA	NA	NA	NA	NA	NA	NA	8	0.0219222	0.696625	NA	NA	NA	10	0.00289384	0.309086	NA	NA	NA	NA	NA	NA	NA	NA	NA	13	0.000646931	0.101343
GO:0051932~synaptic transmission, GABAergic	NA	NA	NA	NA	NA	NA	NA	NA	NA	4	0.0225404	0.700034	NA	NA	NA	4	0.0305033	0.783448	NA	NA	NA	NA	NA	NA	NA	NA	NA	NA	NA	NA
GO:0009790~embryo development	NA	NA	NA	NA	NA	NA	NA	NA	NA	10	0.0227175	0.696262	NA	NA	NA	NA	NA	NA	NA	NA	NA	NA	NA	NA	NA	NA	NA	NA	NA	NA
GO:0005829~cytosol	NA	NA	NA	NA	NA	NA	NA	NA	NA	112	0.0227665	0.275163	NA	NA	NA	126	0.0103926	0.152255	NA	NA	NA	NA	NA	NA	NA	NA	NA	171	0.00354234	0.0758282
mmu04360:Axon guidance	NA	NA	NA	NA	NA	NA	NA	NA	NA	14	0.023121	0.173344	19	0.00221257	0.241013	NA	NA	NA	NA	NA	NA	NA	NA	NA	20	0.00492981	0.64827	NA	NA	NA
GO:0030955~potassium ion binding	NA	NA	NA	NA	NA	NA	NA	NA	NA	4	0.0235035	0.529126	NA	NA	NA	4	0.032396	0.590991	NA	NA	NA	NA	NA	NA	NA	NA	NA	NA	NA	NA
GO:0034220~ion transmembrane transport	NA	NA	NA	NA	NA	NA	NA	NA	NA	6	0.0240404	0.710413	7	0.0179129	0.963324	6	0.0371162	0.822458	NA	NA	NA	NA	NA	NA	NA	NA	NA	8	0.0118609	0.630048
GO:0050769~positive regulation of neurogenesis	NA	NA	NA	NA	NA	NA	NA	NA	NA	6	0.0240404	0.710413	NA	NA	NA	6	0.0371162	0.822458	NA	NA	NA	NA	NA	NA	NA	NA	NA	7	0.0394735	1
GO:0043523~regulation of neuron apoptotic process	NA	NA	NA	NA	NA	NA	NA	NA	NA	6	0.0240404	0.710413	NA	NA	NA	7	0.00970814	0.526114	NA	NA	NA	NA	NA	NA	NA	NA	NA	7	0.0394735	1
GO:0046875~ephrin receptor binding	NA	NA	NA	NA	NA	NA	NA	NA	NA	6	0.0255401	0.546163	NA	NA	NA	NA	NA	NA	NA	NA	NA	NA	NA	NA	NA	NA	NA	NA	NA	NA
GO:0019226~transmission of nerve impulse	NA	NA	NA	NA	NA	NA	NA	NA	NA	5	0.0257831	0.729365	NA	NA	NA	6	0.00784307	0.507924	NA	NA	NA	NA	NA	NA	NA	NA	NA	8	0.00119484	0.151398
GO:0007416~synapse assembly	NA	NA	NA	NA	NA	NA	NA	NA	NA	7	0.0264366	0.732181	NA	NA	NA	NA	NA	NA	NA	NA	NA	NA	NA	NA	NA	NA	NA	9	0.022677	0.910105
mmu04930:Type II diabetes mellitus	NA	NA	NA	NA	NA	NA	NA	NA	NA	7	0.0269932	0.193672	NA	NA	NA	8	0.0155537	0.131078	NA	NA	NA	NA	NA	NA	NA	NA	NA	9	0.0310898	0.214267
GO:1901381~positive regulation of potassium ion transmembrane transport	NA	NA	NA	NA	NA	NA	NA	NA	NA	4	0.0287844	0.756303	NA	NA	NA	4	0.0480027	0.862202	NA	NA	NA	NA	NA	NA	NA	NA	NA	NA	NA	NA
GO:0061001~regulation of dendritic spine morphogenesis	NA	NA	NA	NA	NA	NA	NA	NA	NA	4	0.0287844	0.756303	NA	NA	NA	NA	NA	NA	NA	NA	NA	NA	NA	NA	NA	NA	NA	5	0.0172884	0.802815
GO:0060081~membrane hyperpolarization	NA	NA	NA	NA	NA	NA	NA	NA	NA	4	0.0287844	0.756303	NA	NA	NA	5	0.00576544	0.415215	NA	NA	NA	NA	NA	NA	NA	NA	NA	5	0.0172884	0.802815
GO:0017146~NMDA selective glutamate receptor complex	NA	NA	NA	NA	NA	NA	NA	NA	NA	4	0.0290812	0.330901	NA	NA	NA	6	0.000602241	0.0174665	NA	NA	NA	NA	NA	NA	NA	NA	NA	6	0.00248052	0.0585915
GO:0001518~voltage-gated sodium channel complex	NA	NA	NA	NA	NA	NA	NA	NA	NA	4	0.0290812	0.330901	NA	NA	NA	5	0.00773844	0.132395	NA	NA	NA	NA	NA	NA	NA	NA	NA	5	0.016789	0.255567
GO:0015459~potassium channel regulator activity	NA	NA	NA	NA	NA	NA	NA	NA	NA	6	0.0292109	0.58274	NA	NA	NA	7	0.0127815	0.390262	NA	NA	NA	NA	NA	NA	NA	NA	NA	8	0.0162924	0.565472
GO:0019904~protein domain specific binding	NA	NA	NA	NA	NA	NA	NA	NA	NA	24	0.0297529	0.577188	NA	NA	NA	NA	NA	NA	NA	NA	NA	NA	NA	NA	NA	NA	NA	34	0.0268727	0.700608
GO:0051966~regulation of synaptic transmission, glutamatergic	NA	NA	NA	NA	NA	NA	NA	NA	NA	5	0.0304303	0.769826	NA	NA	NA	5	0.0438039	0.839381	NA	NA	NA	NA	NA	NA	NA	NA	NA	6	0.0338212	1
GO:0050796~regulation of insulin secretion	NA	NA	NA	NA	NA	NA	NA	NA	NA	6	0.0312945	0.773844	NA	NA	NA	NA	NA	NA	NA	NA	NA	NA	NA	NA	NA	NA	NA	NA	NA	NA
GO:0006810~transport	NA	NA	NA	NA	NA	NA	NA	NA	NA	108	0.0321131	0.777192	NA	NA	NA	131	0.00138682	0.175645	NA	NA	NA	NA	NA	NA	NA	NA	NA	175	0.000673379	0.101343
mmu04270:Vascular smooth muscle contraction	NA	NA	NA	NA	NA	NA	NA	NA	NA	11	0.0324153	0.221871	NA	NA	NA	13	0.0170215	0.137897	NA	NA	NA	NA	NA	NA	NA	NA	NA	17	0.0101816	0.0895283
GO:0007420~brain development	NA	NA	NA	NA	NA	NA	NA	NA	NA	19	0.0327138	0.778141	NA	NA	NA	NA	NA	NA	NA	NA	NA	NA	NA	NA	NA	NA	NA	NA	NA	NA
GO:0051965~positive regulation of synapse assembly	NA	NA	NA	NA	NA	NA	NA	NA	NA	9	0.0333918	0.779847	NA	NA	NA	NA	NA	NA	NA	NA	NA	NA	NA	NA	NA	NA	NA	NA	NA	NA
mmu05016:Huntington's disease	NA	NA	NA	NA	NA	NA	NA	NA	NA	17	0.0341881	0.226282	NA	NA	NA	19	0.04292	0.261636	NA	NA	NA	NA	NA	NA	NA	NA	NA	NA	NA	NA
mmu04015:Rap1 signaling pathway	NA	NA	NA	NA	NA	NA	NA	NA	NA	18	0.0352875	0.226569	NA	NA	NA	24	0.00272864	0.0325211	NA	NA	NA	NA	NA	NA	NA	NA	NA	30	0.00461251	0.0470476
GO:0051968~positive regulation of synaptic transmission, glutamatergic	NA	NA	NA	NA	NA	NA	NA	NA	NA	5	0.0355391	0.795611	NA	NA	NA	NA	NA	NA	NA	NA	NA	NA	NA	NA	NA	NA	NA	8	0.00224427	0.219089
GO:0046579~positive regulation of Ras protein signal transduction	NA	NA	NA	NA	NA	NA	NA	NA	NA	5	0.0355391	0.795611	NA	NA	NA	NA	NA	NA	NA	NA	NA	NA	NA	NA	NA	NA	NA	8	0.00224427	0.219089
GO:0007205~protein kinase C-activating G-protein coupled receptor signaling pathway	NA	NA	NA	NA	NA	NA	NA	NA	NA	5	0.0355391	0.795611	NA	NA	NA	NA	NA	NA	NA	NA	NA	NA	NA	NA	NA	NA	NA	8	0.00224427	0.219089
GO:0021756~striatum development	NA	NA	NA	NA	NA	NA	NA	NA	NA	4	0.0358444	0.793479	NA	NA	NA	4	0.0480027	0.862202	NA	NA	NA	NA	NA	NA	NA	NA	NA	6	0.00388338	0.312738
GO:0030033~microvillus assembly	NA	NA	NA	NA	NA	NA	NA	NA	NA	4	0.0358444	0.793479	NA	NA	NA	NA	NA	NA	NA	NA	NA	NA	NA	NA	NA	NA	NA	NA	NA	NA
GO:0006874~cellular calcium ion homeostasis	NA	NA	NA	NA	NA	NA	NA	NA	NA	10	0.0359331	0.789386	NA	NA	NA	12	0.0140821	0.587799	NA	NA	NA	NA	NA	NA	NA	NA	NA	13	0.0387894	1
GO:0032839~dendrite cytoplasm	NA	NA	NA	NA	NA	NA	NA	NA	NA	5	0.0359871	0.385248	NA	NA	NA	5	0.0499452	0.444398	NA	NA	NA	NA	NA	NA	NA	NA	NA	7	0.010136	0.169346
GO:0018105~peptidyl-serine phosphorylation	NA	NA	NA	NA	NA	NA	NA	NA	NA	14	0.0362461	0.78742	NA	NA	NA	15	0.0406667	0.828918	NA	NA	NA	NA	NA	NA	NA	NA	NA	19	0.0369264	1
GO:0016594~glycine binding	NA	NA	NA	NA	NA	NA	NA	NA	NA	4	0.0373252	0.649768	NA	NA	NA	NA	NA	NA	NA	NA	NA	NA	NA	NA	NA	NA	NA	NA	NA	NA
GO:0005261~cation channel activity	NA	NA	NA	NA	NA	NA	NA	NA	NA	6	0.0375078	0.639923	NA	NA	NA	7	0.0174286	0.428564	NA	NA	NA	NA	NA	NA	NA	NA	NA	NA	NA	NA
GO:0048471~perinuclear region of cytoplasm	NA	NA	NA	NA	NA	NA	NA	NA	NA	49	0.0389694	0.402379	NA	NA	NA	53	0.0478654	0.443219	NA	NA	NA	NA	NA	NA	NA	NA	NA	74	0.011256	0.18358
mmu05031:Amphetamine addiction	NA	NA	NA	NA	NA	NA	NA	NA	NA	8	0.0400924	0.247249	NA	NA	NA	14	6.68332e-05	0.00230793	NA	NA	NA	NA	NA	NA	NA	NA	NA	18	1.05581e-05	0.000448718
GO:0097060~synaptic membrane	NA	NA	NA	NA	NA	NA	NA	NA	NA	6	0.0403675	0.406043	NA	NA	NA	NA	NA	NA	NA	NA	NA	NA	NA	NA	NA	NA	NA	9	0.00676319	0.128688
GO:0016310~phosphorylation	NA	NA	NA	NA	NA	NA	NA	NA	NA	44	0.0412071	0.824359	NA	NA	NA	51	0.0177846	0.638513	NA	NA	NA	NA	NA	NA	NA	NA	NA	66	0.018432	0.821932
GO:0005891~voltage-gated calcium channel complex	NA	NA	NA	NA	NA	NA	NA	NA	NA	5	0.0416234	0.408447	NA	NA	NA	NA	NA	NA	NA	NA	NA	NA	NA	NA	NA	NA	NA	8	0.00283985	0.0633605
mmu04911:Insulin secretion	NA	NA	NA	NA	NA	NA	NA	NA	NA	9	0.0417085	0.249689	NA	NA	NA	NA	NA	NA	NA	NA	NA	NA	NA	NA	NA	NA	NA	NA	NA	NA
mmu04750:Inflammatory mediator regulation of TRP channels	NA	NA	NA	NA	NA	NA	NA	NA	NA	10	0.0420693	0.245543	NA	NA	NA	15	0.000832293	0.0142897	NA	NA	NA	NA	NA	NA	NA	NA	NA	16	0.00806183	0.0734202
GO:0008022~protein C-terminus binding	NA	NA	NA	NA	NA	NA	NA	NA	NA	19	0.0423699	0.674275	NA	NA	NA	NA	NA	NA	NA	NA	NA	NA	NA	NA	NA	NA	NA	NA	NA	NA
GO:0007197~adenylate cyclase-inhibiting G-protein coupled acetylcholine receptor signaling pathway	NA	NA	NA	NA	NA	NA	NA	NA	NA	3	0.0430501	0.833517	NA	NA	NA	NA	NA	NA	NA	NA	NA	NA	NA	NA	NA	NA	NA	NA	NA	NA
GO:0007207~phospholipase C-activating G-protein coupled acetylcholine receptor signaling pathway	NA	NA	NA	NA	NA	NA	NA	NA	NA	3	0.0430501	0.833517	NA	NA	NA	NA	NA	NA	NA	NA	NA	NA	NA	NA	NA	NA	NA	NA	NA	NA
GO:0007016~cytoskeletal anchoring at plasma membrane	NA	NA	NA	NA	NA	NA	NA	NA	NA	3	0.0430501	0.833517	NA	NA	NA	NA	NA	NA	NA	NA	NA	NA	NA	NA	NA	NA	NA	NA	NA	NA
GO:0014061~regulation of norepinephrine secretion	NA	NA	NA	NA	NA	NA	NA	NA	NA	3	0.0430501	0.833517	NA	NA	NA	NA	NA	NA	NA	NA	NA	NA	NA	NA	NA	NA	NA	4	0.0114602	0.627184
GO:0016907~G-protein coupled acetylcholine receptor activity	NA	NA	NA	NA	NA	NA	NA	NA	NA	3	0.044324	0.680205	NA	NA	NA	NA	NA	NA	NA	NA	NA	NA	NA	NA	NA	NA	NA	NA	NA	NA
GO:0005245~voltage-gated calcium channel activity	NA	NA	NA	NA	NA	NA	NA	NA	NA	6	0.0471111	0.692367	NA	NA	NA	7	0.0231196	0.490684	NA	NA	NA	NA	NA	NA	NA	NA	NA	11	0.000659971	0.103238
GO:0016236~macroautophagy	NA	NA	NA	NA	NA	NA	NA	NA	NA	5	0.0471527	0.856323	NA	NA	NA	NA	NA	NA	NA	NA	NA	NA	NA	NA	NA	NA	NA	NA	NA	NA
GO:0008016~regulation of heart contraction	NA	NA	NA	NA	NA	NA	NA	NA	NA	5	0.0471527	0.856323	NA	NA	NA	NA	NA	NA	NA	NA	NA	NA	NA	NA	NA	NA	NA	NA	NA	NA
mmu05032:Morphine addiction	NA	NA	NA	NA	NA	NA	NA	NA	NA	NA	NA	NA	16	0.000503106	0.117772	11	0.0455451	0.26901	NA	NA	NA	NA	NA	NA	16	0.00235244	0.618692	18	0.00141741	0.018072
GO:1902287~semaphorin-plexin signaling pathway involved in axon guidance	NA	NA	NA	NA	NA	NA	NA	NA	NA	NA	NA	NA	6	0.00173818	0.660995	NA	NA	NA	NA	NA	NA	NA	NA	NA	6	0.00308329	1	NA	NA	NA
GO:0015293~symporter activity	NA	NA	NA	NA	NA	NA	NA	NA	NA	NA	NA	NA	14	0.00501093	0.645076	NA	NA	NA	NA	NA	NA	NA	NA	NA	NA	NA	NA	NA	NA	NA
GO:0007264~small GTPase mediated signal transduction	NA	NA	NA	NA	NA	NA	NA	NA	NA	NA	NA	NA	28	0.00635942	0.941194	NA	NA	NA	NA	NA	NA	NA	NA	NA	27	0.0481517	1	NA	NA	NA
GO:0021785~branchiomotor neuron axon guidance	NA	NA	NA	NA	NA	NA	NA	NA	NA	NA	NA	NA	5	0.00653614	0.921797	NA	NA	NA	NA	NA	NA	NA	NA	NA	5	0.0103098	1	NA	NA	NA
GO:0021675~nerve development	NA	NA	NA	NA	NA	NA	NA	NA	NA	NA	NA	NA	5	0.00653614	0.921797	NA	NA	NA	NA	NA	NA	NA	NA	NA	5	0.0103098	1	NA	NA	NA
GO:0021637~trigeminal nerve structural organization	NA	NA	NA	NA	NA	NA	NA	NA	NA	NA	NA	NA	4	0.00688821	0.908162	NA	NA	NA	NA	NA	NA	NA	NA	NA	4	0.00989624	1	NA	NA	NA
GO:0035023~regulation of Rho protein signal transduction	NA	NA	NA	NA	NA	NA	NA	NA	NA	NA	NA	NA	13	0.00885815	0.937104	NA	NA	NA	NA	NA	NA	NA	NA	NA	13	0.0226496	1	NA	NA	NA
GO:0021612~facial nerve structural organization	NA	NA	NA	NA	NA	NA	NA	NA	NA	NA	NA	NA	4	0.0113927	0.948625	NA	NA	NA	NA	NA	NA	NA	NA	NA	4	0.0162388	1	NA	NA	NA
GO:0015629~actin cytoskeleton	NA	NA	NA	NA	NA	NA	NA	NA	NA	NA	NA	NA	24	0.0115339	0.410435	NA	NA	NA	NA	NA	NA	NA	NA	NA	NA	NA	NA	NA	NA	NA
GO:0008045~motor neuron axon guidance	NA	NA	NA	NA	NA	NA	NA	NA	NA	NA	NA	NA	6	0.013551	0.940861	NA	NA	NA	NA	NA	NA	NA	NA	NA	7	0.00493958	1	NA	NA	NA
mmu04727:GABAergic synapse	NA	NA	NA	NA	NA	NA	NA	NA	NA	NA	NA	NA	12	0.0152979	0.472586	NA	NA	NA	NA	NA	NA	NA	NA	NA	13	0.0181189	1	14	0.0225598	0.169198
GO:0098703~calcium ion import across plasma membrane	NA	NA	NA	NA	NA	NA	NA	NA	NA	NA	NA	NA	3	0.0157167	0.953958	NA	NA	NA	NA	NA	NA	NA	NA	NA	3	0.0201883	1	NA	NA	NA
GO:0032426~stereocilium tip	NA	NA	NA	NA	NA	NA	NA	NA	NA	NA	NA	NA	4	0.0174871	0.493327	NA	NA	NA	NA	NA	NA	NA	NA	NA	NA	NA	NA	NA	NA	NA
GO:0070330~aromatase activity	NA	NA	NA	NA	NA	NA	NA	NA	NA	NA	NA	NA	4	0.0183398	0.907955	NA	NA	NA	NA	NA	NA	NA	NA	NA	NA	NA	NA	NA	NA	NA
GO:0045177~apical part of cell	NA	NA	NA	NA	NA	NA	NA	NA	NA	NA	NA	NA	15	0.0191579	0.499542	NA	NA	NA	NA	NA	NA	NA	NA	NA	15	0.0473571	1	NA	NA	NA
GO:0005070~SH3/SH2 adaptor activity	NA	NA	NA	NA	NA	NA	NA	NA	NA	NA	NA	NA	6	0.0222668	0.924197	NA	NA	NA	NA	NA	NA	NA	NA	NA	NA	NA	NA	NA	NA	NA
mmu05034:Alcoholism	NA	NA	NA	NA	NA	NA	NA	NA	NA	NA	NA	NA	15	0.0234987	0.570812	14	0.0336505	0.228071	NA	NA	NA	NA	NA	NA	NA	NA	NA	22	0.00130867	0.0175637
GO:0005911~cell-cell junction	NA	NA	NA	NA	NA	NA	NA	NA	NA	NA	NA	NA	22	0.0246384	0.542122	NA	NA	NA	NA	NA	NA	NA	NA	NA	26	0.0096311	0.652256	NA	NA	NA
GO:0002116~semaphorin receptor complex	NA	NA	NA	NA	NA	NA	NA	NA	NA	NA	NA	NA	4	0.0247949	0.522853	NA	NA	NA	NA	NA	NA	NA	NA	NA	4	0.0351587	0.933464	NA	NA	NA
GO:0098793~presynapse	NA	NA	NA	NA	NA	NA	NA	NA	NA	NA	NA	NA	10	0.0270768	0.534214	NA	NA	NA	NA	NA	NA	NA	NA	NA	NA	NA	NA	NA	NA	NA
GO:0050871~positive regulation of B cell activation	NA	NA	NA	NA	NA	NA	NA	NA	NA	NA	NA	NA	3	0.0298901	0.994707	NA	NA	NA	NA	NA	NA	NA	NA	NA	NA	NA	NA	NA	NA	NA
GO:0051219~phosphoprotein binding	NA	NA	NA	NA	NA	NA	NA	NA	NA	NA	NA	NA	9	0.0300925	0.942949	NA	NA	NA	NA	NA	NA	NA	NA	NA	NA	NA	NA	NA	NA	NA
GO:0030308~negative regulation of cell growth	NA	NA	NA	NA	NA	NA	NA	NA	NA	NA	NA	NA	15	0.0307389	0.993957	NA	NA	NA	NA	NA	NA	NA	NA	NA	NA	NA	NA	NA	NA	NA
GO:0015349~thyroid hormone transmembrane transporter activity	NA	NA	NA	NA	NA	NA	NA	NA	NA	NA	NA	NA	3	0.0312232	0.934478	NA	NA	NA	NA	NA	NA	NA	NA	NA	NA	NA	NA	NA	NA	NA
GO:0031852~mu-type opioid receptor binding	NA	NA	NA	NA	NA	NA	NA	NA	NA	NA	NA	NA	3	0.0312232	0.934478	NA	NA	NA	NA	NA	NA	NA	NA	NA	3	0.0389999	1	NA	NA	NA
GO:0048846~axon extension involved in axon guidance	NA	NA	NA	NA	NA	NA	NA	NA	NA	NA	NA	NA	4	0.0330224	0.994593	NA	NA	NA	NA	NA	NA	NA	NA	NA	4	0.0459857	1	NA	NA	NA
GO:0044291~cell-cell contact zone	NA	NA	NA	NA	NA	NA	NA	NA	NA	NA	NA	NA	5	0.0335905	0.593814	NA	NA	NA	NA	NA	NA	NA	NA	NA	NA	NA	NA	NA	NA	NA
GO:0045921~positive regulation of exocytosis	NA	NA	NA	NA	NA	NA	NA	NA	NA	NA	NA	NA	6	0.0341758	0.992658	NA	NA	NA	NA	NA	NA	NA	NA	NA	NA	NA	NA	NA	NA	NA
GO:0005548~phospholipid transporter activity	NA	NA	NA	NA	NA	NA	NA	NA	NA	NA	NA	NA	4	0.035054	0.940984	NA	NA	NA	NA	NA	NA	NA	NA	NA	4	0.0474176	1	NA	NA	NA
GO:0043395~heparan sulfate proteoglycan binding	NA	NA	NA	NA	NA	NA	NA	NA	NA	NA	NA	NA	5	0.0355333	0.930359	NA	NA	NA	NA	NA	NA	NA	NA	NA	NA	NA	NA	NA	NA	NA
GO:0005272~sodium channel activity	NA	NA	NA	NA	NA	NA	NA	NA	NA	NA	NA	NA	6	0.0372359	0.926334	7	0.00506025	0.240761	NA	NA	NA	NA	NA	NA	NA	NA	NA	8	0.00344238	0.19839
GO:0030036~actin cytoskeleton organization	NA	NA	NA	NA	NA	NA	NA	NA	NA	NA	NA	NA	17	0.0375477	0.994334	16	0.0259093	0.749892	NA	NA	NA	NA	NA	NA	NA	NA	NA	NA	NA	NA
GO:0005929~cilium	NA	NA	NA	NA	NA	NA	NA	NA	NA	NA	NA	NA	25	0.0427748	0.630478	NA	NA	NA	NA	NA	NA	NA	NA	NA	33	0.00244528	0.217551	NA	NA	NA
GO:2001223~negative regulation of neuron migration	NA	NA	NA	NA	NA	NA	NA	NA	NA	NA	NA	NA	4	0.0429547	0.994752	NA	NA	NA	NA	NA	NA	NA	NA	NA	4	0.0459857	1	NA	NA	NA
GO:0035102~PRC1 complex	NA	NA	NA	NA	NA	NA	NA	NA	NA	NA	NA	NA	4	0.0435503	0.620885	NA	NA	NA	NA	NA	NA	NA	NA	NA	NA	NA	NA	NA	NA	NA
GO:0051213~dioxygenase activity	NA	NA	NA	NA	NA	NA	NA	NA	NA	NA	NA	NA	11	0.0448626	0.938191	NA	NA	NA	NA	NA	NA	NA	NA	NA	12	0.041262	1	NA	NA	NA
GO:0005089~Rho guanyl-nucleotide exchange factor activity	NA	NA	NA	NA	NA	NA	NA	NA	NA	NA	NA	NA	11	0.0448626	0.938191	NA	NA	NA	NA	NA	NA	NA	NA	NA	13	0.0182949	1	NA	NA	NA
GO:0042981~regulation of apoptotic process	NA	NA	NA	NA	NA	NA	NA	NA	NA	NA	NA	NA	19	0.0455132	0.994328	NA	NA	NA	NA	NA	NA	NA	NA	NA	NA	NA	NA	NA	NA	NA
GO:0071280~cellular response to copper ion	NA	NA	NA	NA	NA	NA	NA	NA	NA	NA	NA	NA	3	0.0473868	0.993468	NA	NA	NA	NA	NA	NA	NA	NA	NA	NA	NA	NA	NA	NA	NA
GO:0070885~negative regulation of calcineurin-NFAT signaling cascade	NA	NA	NA	NA	NA	NA	NA	NA	NA	NA	NA	NA	3	0.0473868	0.993468	NA	NA	NA	NA	NA	NA	NA	NA	NA	NA	NA	NA	NA	NA	NA
GO:0005856~cytoskeleton	NA	NA	NA	NA	NA	NA	NA	NA	NA	NA	NA	NA	92	0.0474875	0.637819	NA	NA	NA	NA	NA	NA	NA	NA	NA	NA	NA	NA	NA	NA	NA
GO:0097440~apical dendrite	NA	NA	NA	NA	NA	NA	NA	NA	NA	NA	NA	NA	5	0.0486185	0.617253	NA	NA	NA	NA	NA	NA	NA	NA	NA	NA	NA	NA	NA	NA	NA
GO:0050291~sphingosine N-acyltransferase activity	NA	NA	NA	NA	NA	NA	NA	NA	NA	NA	NA	NA	3	0.0494421	0.945215	NA	NA	NA	NA	NA	NA	NA	NA	NA	4	0.00546448	1	NA	NA	NA
GO:1900273~positive regulation of long-term synaptic potentiation	NA	NA	NA	NA	NA	NA	NA	NA	NA	NA	NA	NA	NA	NA	NA	8	8.0877e-05	0.0204264	NA	NA	NA	NA	NA	NA	NA	NA	NA	9	7.47257e-05	0.0168764
GO:0070588~calcium ion transmembrane transport	NA	NA	NA	NA	NA	NA	NA	NA	NA	NA	NA	NA	NA	NA	NA	14	0.000765838	0.122192	NA	NA	NA	NA	NA	NA	NA	NA	NA	18	0.00017841	0.0339166
GO:0048365~Rac GTPase binding	NA	NA	NA	NA	NA	NA	NA	NA	NA	NA	NA	NA	NA	NA	NA	10	0.00102953	0.112053	NA	NA	NA	NA	NA	NA	NA	NA	NA	11	0.00257743	0.176393
GO:0003954~NADH dehydrogenase activity	NA	NA	NA	NA	NA	NA	NA	NA	NA	NA	NA	NA	NA	NA	NA	6	0.00105818	0.0930986	NA	NA	NA	NA	NA	NA	NA	NA	NA	5	0.0252901	0.700608
GO:0008179~adenylate cyclase binding	NA	NA	NA	NA	NA	NA	NA	NA	NA	NA	NA	NA	NA	NA	NA	6	0.0015565	0.112915	NA	NA	NA	NA	NA	NA	NA	NA	NA	7	0.000902696	0.123556
GO:0048787~presynaptic active zone membrane	NA	NA	NA	NA	NA	NA	NA	NA	NA	NA	NA	NA	NA	NA	NA	4	0.00243798	0.0577628	NA	NA	NA	NA	NA	NA	NA	NA	NA	4	0.00598561	0.120592
GO:0044224~juxtaparanode region of axon	NA	NA	NA	NA	NA	NA	NA	NA	NA	NA	NA	NA	NA	NA	NA	5	0.00265646	0.0603464	NA	NA	NA	NA	NA	NA	NA	NA	NA	5	0.00821595	0.144306
GO:0014704~intercalated disc	NA	NA	NA	NA	NA	NA	NA	NA	NA	NA	NA	NA	NA	NA	NA	10	0.00278061	0.0585466	NA	NA	NA	NA	NA	NA	NA	NA	NA	11	0.00696358	0.12892
GO:0051930~regulation of sensory perception of pain	NA	NA	NA	NA	NA	NA	NA	NA	NA	NA	NA	NA	NA	NA	NA	9	0.00312853	0.31872	NA	NA	NA	NA	NA	NA	NA	NA	NA	NA	NA	NA
GO:0034705~potassium channel complex	NA	NA	NA	NA	NA	NA	NA	NA	NA	NA	NA	NA	NA	NA	NA	5	0.00396245	0.0796041	NA	NA	NA	NA	NA	NA	NA	NA	NA	6	0.00155967	0.0427351
GO:0002031~G-protein coupled receptor internalization	NA	NA	NA	NA	NA	NA	NA	NA	NA	NA	NA	NA	NA	NA	NA	5	0.00405	0.358403	NA	NA	NA	NA	NA	NA	NA	NA	NA	5	0.0123847	0.630048
GO:0043484~regulation of RNA splicing	NA	NA	NA	NA	NA	NA	NA	NA	NA	NA	NA	NA	NA	NA	NA	7	0.00451727	0.380004	NA	NA	NA	NA	NA	NA	NA	NA	NA	NA	NA	NA
GO:2000311~regulation of alpha-amino-3-hydroxy-5-methyl-4-isoxazole propionate selective glutamate receptor activity	NA	NA	NA	NA	NA	NA	NA	NA	NA	NA	NA	NA	NA	NA	NA	6	0.00482957	0.3899	NA	NA	NA	NA	NA	NA	NA	NA	NA	6	0.0177811	0.802815
GO:0005248~voltage-gated sodium channel activity	NA	NA	NA	NA	NA	NA	NA	NA	NA	NA	NA	NA	NA	NA	NA	6	0.00533134	0.228704	NA	NA	NA	NA	NA	NA	NA	NA	NA	6	0.0153335	0.559674
GO:2000463~positive regulation of excitatory postsynaptic potential	NA	NA	NA	NA	NA	NA	NA	NA	NA	NA	NA	NA	NA	NA	NA	7	0.00555528	0.413189	NA	NA	NA	NA	NA	NA	NA	NA	NA	8	0.00631988	0.407632
GO:0045776~negative regulation of blood pressure	NA	NA	NA	NA	NA	NA	NA	NA	NA	NA	NA	NA	NA	NA	NA	7	0.00555528	0.413189	NA	NA	NA	NA	NA	NA	NA	NA	NA	7	0.0199246	0.846677
GO:0043278~response to morphine	NA	NA	NA	NA	NA	NA	NA	NA	NA	NA	NA	NA	NA	NA	NA	7	0.00555528	0.413189	NA	NA	NA	NA	NA	NA	NA	NA	NA	8	0.00631988	0.407632
GO:0030315~T-tubule	NA	NA	NA	NA	NA	NA	NA	NA	NA	NA	NA	NA	NA	NA	NA	10	0.00724983	0.13228	NA	NA	NA	NA	NA	NA	NA	NA	NA	14	0.000662268	0.0206206
GO:0031410~cytoplasmic vesicle	NA	NA	NA	NA	NA	NA	NA	NA	NA	NA	NA	NA	NA	NA	NA	53	0.00759794	0.13405	NA	NA	NA	NA	NA	NA	NA	NA	NA	NA	NA	NA
GO:0035725~sodium ion transmembrane transport	NA	NA	NA	NA	NA	NA	NA	NA	NA	NA	NA	NA	NA	NA	NA	7	0.00813708	0.500893	NA	NA	NA	NA	NA	NA	NA	NA	NA	8	0.00631988	0.407632
GO:0010976~positive regulation of neuron projection development	NA	NA	NA	NA	NA	NA	NA	NA	NA	NA	NA	NA	NA	NA	NA	17	0.00877679	0.508526	NA	NA	NA	NA	NA	NA	NA	NA	NA	21	0.0100055	0.586567
mmu04530:Tight junction	NA	NA	NA	NA	NA	NA	NA	NA	NA	NA	NA	NA	NA	NA	NA	11	0.00878615	0.0818787	NA	NA	NA	NA	NA	NA	NA	NA	NA	14	0.00557083	0.054637
GO:0005938~cell cortex	NA	NA	NA	NA	NA	NA	NA	NA	NA	NA	NA	NA	NA	NA	NA	17	0.00894903	0.143301	NA	NA	NA	NA	NA	NA	NA	NA	NA	23	0.00197541	0.0483269
GO:0055085~transmembrane transport	NA	NA	NA	NA	NA	NA	NA	NA	NA	NA	NA	NA	NA	NA	NA	31	0.00919752	0.5159	NA	NA	NA	NA	NA	NA	NA	NA	NA	41	0.00389623	0.312738
GO:0005884~actin filament	NA	NA	NA	NA	NA	NA	NA	NA	NA	NA	NA	NA	NA	NA	NA	11	0.00941123	0.14619	NA	NA	NA	NA	NA	NA	NA	NA	NA	13	0.0119348	0.190124
GO:0050804~modulation of synaptic transmission	NA	NA	NA	NA	NA	NA	NA	NA	NA	NA	NA	NA	NA	NA	NA	6	0.0119606	0.559023	NA	NA	NA	NA	NA	NA	NA	NA	NA	6	0.040664	1
GO:0008066~glutamate receptor activity	NA	NA	NA	NA	NA	NA	NA	NA	NA	NA	NA	NA	NA	NA	NA	4	0.0127711	0.402984	NA	NA	NA	NA	NA	NA	NA	NA	NA	4	0.0299681	0.703668
GO:0004972~NMDA glutamate receptor activity	NA	NA	NA	NA	NA	NA	NA	NA	NA	NA	NA	NA	NA	NA	NA	4	0.0127711	0.402984	NA	NA	NA	NA	NA	NA	NA	NA	NA	4	0.0299681	0.703668
GO:0033270~paranode region of axon	NA	NA	NA	NA	NA	NA	NA	NA	NA	NA	NA	NA	NA	NA	NA	5	0.0133231	0.186561	NA	NA	NA	NA	NA	NA	NA	NA	NA	5	0.037444	0.469338
GO:0050877~neurological system process	NA	NA	NA	NA	NA	NA	NA	NA	NA	NA	NA	NA	NA	NA	NA	5	0.0136008	0.582542	NA	NA	NA	NA	NA	NA	NA	NA	NA	7	0.00121554	0.151398
GO:0008270~zinc ion binding	NA	NA	NA	NA	NA	NA	NA	NA	NA	NA	NA	NA	NA	NA	NA	78	0.0137563	0.400349	NA	NA	NA	NA	NA	NA	NA	NA	NA	NA	NA	NA
GO:0030165~PDZ domain binding	NA	NA	NA	NA	NA	NA	NA	NA	NA	NA	NA	NA	NA	NA	NA	15	0.0141992	0.398112	NA	NA	NA	NA	NA	NA	NA	NA	NA	18	0.0214905	0.636004
GO:0010765~positive regulation of sodium ion transport	NA	NA	NA	NA	NA	NA	NA	NA	NA	NA	NA	NA	NA	NA	NA	6	0.0144836	0.590764	NA	NA	NA	NA	NA	NA	NA	NA	NA	7	0.0132288	0.663645
GO:0005737~cytoplasm	NA	NA	NA	NA	NA	NA	NA	NA	NA	NA	NA	NA	NA	NA	NA	401	0.0145955	0.197919	NA	NA	NA	NA	NA	NA	NA	NA	NA	570	2.65963e-05	0.00113865
GO:0035418~protein localization to synapse	NA	NA	NA	NA	NA	NA	NA	NA	NA	NA	NA	NA	NA	NA	NA	5	0.0172195	0.633406	NA	NA	NA	NA	NA	NA	NA	NA	NA	6	0.0105224	0.586567
GO:0051017~actin filament bundle assembly	NA	NA	NA	NA	NA	NA	NA	NA	NA	NA	NA	NA	NA	NA	NA	7	0.018162	0.639558	NA	NA	NA	NA	NA	NA	NA	NA	NA	8	0.0237967	0.924233
GO:0035612~AP-2 adaptor complex binding	NA	NA	NA	NA	NA	NA	NA	NA	NA	NA	NA	NA	NA	NA	NA	4	0.0182205	0.432068	NA	NA	NA	NA	NA	NA	NA	NA	NA	NA	NA	NA
mmu04924:Renin secretion	NA	NA	NA	NA	NA	NA	NA	NA	NA	NA	NA	NA	NA	NA	NA	9	0.0203602	0.157731	NA	NA	NA	NA	NA	NA	NA	NA	NA	13	0.00262471	0.0304227
GO:0032794~GTPase activating protein binding	NA	NA	NA	NA	NA	NA	NA	NA	NA	NA	NA	NA	NA	NA	NA	5	0.0230861	0.501139	NA	NA	NA	NA	NA	NA	NA	NA	NA	NA	NA	NA
GO:0071286~cellular response to magnesium ion	NA	NA	NA	NA	NA	NA	NA	NA	NA	NA	NA	NA	NA	NA	NA	3	0.0232053	0.716705	NA	NA	NA	NA	NA	NA	NA	NA	NA	NA	NA	NA
GO:0016324~apical plasma membrane	NA	NA	NA	NA	NA	NA	NA	NA	NA	NA	NA	NA	NA	NA	NA	25	0.0251784	0.29896	NA	NA	NA	NA	NA	NA	NA	NA	NA	NA	NA	NA
GO:0042220~response to cocaine	NA	NA	NA	NA	NA	NA	NA	NA	NA	NA	NA	NA	NA	NA	NA	7	0.0271035	0.759741	NA	NA	NA	NA	NA	NA	NA	NA	NA	9	0.012228	0.630048
GO:0045732~positive regulation of protein catabolic process	NA	NA	NA	NA	NA	NA	NA	NA	NA	NA	NA	NA	NA	NA	NA	9	0.0274311	0.758156	NA	NA	NA	NA	NA	NA	NA	NA	NA	NA	NA	NA
GO:0050770~regulation of axonogenesis	NA	NA	NA	NA	NA	NA	NA	NA	NA	NA	NA	NA	NA	NA	NA	6	0.0280597	0.760366	NA	NA	NA	NA	NA	NA	NA	NA	NA	NA	NA	NA
mmu04390:Hippo signaling pathway	NA	NA	NA	NA	NA	NA	NA	NA	NA	NA	NA	NA	NA	NA	NA	16	0.0289816	0.205138	NA	NA	NA	NA	NA	NA	NA	NA	NA	NA	NA	NA
GO:0007610~behavior	NA	NA	NA	NA	NA	NA	NA	NA	NA	NA	NA	NA	NA	NA	NA	4	0.0305033	0.783448	NA	NA	NA	NA	NA	NA	NA	NA	NA	NA	NA	NA
GO:0007193~adenylate cyclase-inhibiting G-protein coupled receptor signaling pathway	NA	NA	NA	NA	NA	NA	NA	NA	NA	NA	NA	NA	NA	NA	NA	7	0.030632	0.779552	NA	NA	NA	NA	NA	NA	NA	NA	NA	NA	NA	NA
GO:0030673~axolemma	NA	NA	NA	NA	NA	NA	NA	NA	NA	NA	NA	NA	NA	NA	NA	5	0.0308185	0.340447	NA	NA	NA	NA	NA	NA	NA	NA	NA	6	0.0216616	0.305695
GO:0000407~pre-autophagosomal structure	NA	NA	NA	NA	NA	NA	NA	NA	NA	NA	NA	NA	NA	NA	NA	5	0.0308185	0.340447	NA	NA	NA	NA	NA	NA	NA	NA	NA	NA	NA	NA
GO:0004672~protein kinase activity	NA	NA	NA	NA	NA	NA	NA	NA	NA	NA	NA	NA	NA	NA	NA	44	0.0321441	0.599014	NA	NA	NA	NA	NA	NA	NA	NA	NA	NA	NA	NA
GO:0048169~regulation of long-term neuronal synaptic plasticity	NA	NA	NA	NA	NA	NA	NA	NA	NA	NA	NA	NA	NA	NA	NA	6	0.0323907	0.793064	NA	NA	NA	NA	NA	NA	NA	NA	NA	9	0.00237268	0.225411
GO:0016651~oxidoreductase activity, acting on NAD(P)H	NA	NA	NA	NA	NA	NA	NA	NA	NA	NA	NA	NA	NA	NA	NA	4	0.032396	0.590991	NA	NA	NA	NA	NA	NA	NA	NA	NA	NA	NA	NA
GO:0017124~SH3 domain binding	NA	NA	NA	NA	NA	NA	NA	NA	NA	NA	NA	NA	NA	NA	NA	14	0.0327431	0.58436	NA	NA	NA	NA	NA	NA	17	0.028476	1	17	0.0476364	0.931462
GO:0000187~activation of MAPK activity	NA	NA	NA	NA	NA	NA	NA	NA	NA	NA	NA	NA	NA	NA	NA	9	0.0361674	0.823659	NA	NA	NA	NA	NA	NA	NA	NA	NA	NA	NA	NA
GO:0030950~establishment or maintenance of actin cytoskeleton polarity	NA	NA	NA	NA	NA	NA	NA	NA	NA	NA	NA	NA	NA	NA	NA	3	0.0370215	0.826256	NA	NA	NA	NA	NA	NA	NA	NA	NA	NA	NA	NA
GO:0050905~neuromuscular process	NA	NA	NA	NA	NA	NA	NA	NA	NA	NA	NA	NA	NA	NA	NA	5	0.0373181	0.819599	NA	NA	NA	NA	NA	NA	NA	NA	NA	6	0.0277421	1
GO:0051539~4 iron, 4 sulfur cluster binding	NA	NA	NA	NA	NA	NA	NA	NA	NA	NA	NA	NA	NA	NA	NA	7	0.0379583	0.629225	NA	NA	NA	NA	NA	NA	NA	NA	NA	NA	NA	NA
GO:0001666~response to hypoxia	NA	NA	NA	NA	NA	NA	NA	NA	NA	NA	NA	NA	NA	NA	NA	18	0.0380536	0.821232	NA	NA	NA	NA	NA	NA	NA	NA	NA	NA	NA	NA
GO:0097110~scaffold protein binding	NA	NA	NA	NA	NA	NA	NA	NA	NA	NA	NA	NA	NA	NA	NA	8	0.0382159	0.621684	NA	NA	NA	NA	NA	NA	NA	NA	NA	NA	NA	NA
GO:0032922~circadian regulation of gene expression	NA	NA	NA	NA	NA	NA	NA	NA	NA	NA	NA	NA	NA	NA	NA	9	0.0394528	0.823767	NA	NA	NA	NA	NA	NA	NA	NA	NA	13	0.00591169	0.407632
GO:0004683~calmodulin-dependent protein kinase activity	NA	NA	NA	NA	NA	NA	NA	NA	NA	NA	NA	NA	NA	NA	NA	5	0.0401441	0.630347	NA	NA	NA	NA	NA	NA	NA	NA	NA	6	0.0305736	0.703668
GO:0004722~protein serine/threonine phosphatase activity	NA	NA	NA	NA	NA	NA	NA	NA	NA	NA	NA	NA	NA	NA	NA	8	0.0421304	0.638936	NA	NA	NA	NA	NA	NA	NA	NA	NA	10	0.0352697	0.772407
GO:0051209~release of sequestered calcium ion into cytosol	NA	NA	NA	NA	NA	NA	NA	NA	NA	NA	NA	NA	NA	NA	NA	6	0.0422427	0.83641	NA	NA	NA	NA	NA	NA	NA	NA	NA	NA	NA	NA
GO:0001975~response to amphetamine	NA	NA	NA	NA	NA	NA	NA	NA	NA	NA	NA	NA	NA	NA	NA	6	0.0422427	0.83641	NA	NA	NA	NA	NA	NA	NA	NA	NA	9	0.00380841	0.312738
GO:0051259~protein oligomerization	NA	NA	NA	NA	NA	NA	NA	NA	NA	NA	NA	NA	NA	NA	NA	9	0.0429316	0.837276	NA	NA	NA	NA	NA	NA	NA	NA	NA	NA	NA	NA
GO:0005246~calcium channel regulator activity	NA	NA	NA	NA	NA	NA	NA	NA	NA	NA	NA	NA	NA	NA	NA	5	0.0470659	0.671243	NA	NA	NA	NA	NA	NA	NA	NA	NA	6	0.0372034	0.798779
GO:0042383~sarcolemma	NA	NA	NA	NA	NA	NA	NA	NA	NA	NA	NA	NA	NA	NA	NA	13	0.0486646	0.442167	NA	NA	NA	NA	NA	NA	NA	NA	NA	17	0.0252224	0.338772
GO:0007409~axonogenesis	NA	NA	NA	NA	NA	NA	NA	NA	NA	NA	NA	NA	NA	NA	NA	12	0.049854	0.865684	NA	NA	NA	NA	NA	NA	15	0.032897	1	NA	NA	NA
GO:0003341~cilium movement	NA	NA	NA	NA	NA	NA	NA	NA	NA	NA	NA	NA	NA	NA	NA	NA	NA	NA	NA	NA	NA	NA	NA	NA	9	0.00274556	1	NA	NA	NA
GO:0043406~positive regulation of MAP kinase activity	NA	NA	NA	NA	NA	NA	NA	NA	NA	NA	NA	NA	NA	NA	NA	NA	NA	NA	NA	NA	NA	NA	NA	NA	11	0.00697009	1	NA	NA	NA
GO:0046513~ceramide biosynthetic process	NA	NA	NA	NA	NA	NA	NA	NA	NA	NA	NA	NA	NA	NA	NA	NA	NA	NA	NA	NA	NA	NA	NA	NA	7	0.00821979	1	NA	NA	NA
GO:0030148~sphingolipid biosynthetic process	NA	NA	NA	NA	NA	NA	NA	NA	NA	NA	NA	NA	NA	NA	NA	NA	NA	NA	NA	NA	NA	NA	NA	NA	7	0.0103421	1	NA	NA	NA
GO:0045600~positive regulation of fat cell differentiation	NA	NA	NA	NA	NA	NA	NA	NA	NA	NA	NA	NA	NA	NA	NA	NA	NA	NA	NA	NA	NA	NA	NA	NA	10	0.0116952	1	NA	NA	NA
GO:0030819~positive regulation of cAMP biosynthetic process	NA	NA	NA	NA	NA	NA	NA	NA	NA	NA	NA	NA	NA	NA	NA	NA	NA	NA	NA	NA	NA	NA	NA	NA	8	0.0155461	1	NA	NA	NA
mmu00600:Sphingolipid metabolism	NA	NA	NA	NA	NA	NA	NA	NA	NA	NA	NA	NA	NA	NA	NA	NA	NA	NA	NA	NA	NA	NA	NA	NA	9	0.0164033	1	NA	NA	NA
GO:0009566~fertilization	NA	NA	NA	NA	NA	NA	NA	NA	NA	NA	NA	NA	NA	NA	NA	NA	NA	NA	NA	NA	NA	NA	NA	NA	8	0.0183333	1	NA	NA	NA
GO:0030670~phagocytic vesicle membrane	NA	NA	NA	NA	NA	NA	NA	NA	NA	NA	NA	NA	NA	NA	NA	NA	NA	NA	NA	NA	NA	NA	NA	NA	9	0.0206865	0.797611	NA	NA	NA
GO:0030432~peristalsis	NA	NA	NA	NA	NA	NA	NA	NA	NA	NA	NA	NA	NA	NA	NA	NA	NA	NA	NA	NA	NA	NA	NA	NA	4	0.0243699	1	NA	NA	NA
GO:0050832~defense response to fungus	NA	NA	NA	NA	NA	NA	NA	NA	NA	NA	NA	NA	NA	NA	NA	NA	NA	NA	NA	NA	NA	NA	NA	NA	4	0.0243699	1	NA	NA	NA
GO:0019855~calcium channel inhibitor activity	NA	NA	NA	NA	NA	NA	NA	NA	NA	NA	NA	NA	NA	NA	NA	NA	NA	NA	NA	NA	NA	NA	NA	NA	4	0.0251676	1	NA	NA	NA
GO:0045197~establishment or maintenance of epithelial cell apical/basal polarity	NA	NA	NA	NA	NA	NA	NA	NA	NA	NA	NA	NA	NA	NA	NA	NA	NA	NA	NA	NA	NA	NA	NA	NA	5	0.0255076	1	NA	NA	NA
GO:0034707~chloride channel complex	NA	NA	NA	NA	NA	NA	NA	NA	NA	NA	NA	NA	NA	NA	NA	NA	NA	NA	NA	NA	NA	NA	NA	NA	8	0.0261129	0.815645	NA	NA	NA
GO:0007411~axon guidance	NA	NA	NA	NA	NA	NA	NA	NA	NA	NA	NA	NA	NA	NA	NA	NA	NA	NA	NA	NA	NA	NA	NA	NA	19	0.0269488	1	NA	NA	NA
mmu00340:Histidine metabolism	NA	NA	NA	NA	NA	NA	NA	NA	NA	NA	NA	NA	NA	NA	NA	NA	NA	NA	NA	NA	NA	NA	NA	NA	5	0.027034	1	NA	NA	NA
mmu05414:Dilated cardiomyopathy	NA	NA	NA	NA	NA	NA	NA	NA	NA	NA	NA	NA	NA	NA	NA	NA	NA	NA	NA	NA	NA	NA	NA	NA	12	0.031731	1	NA	NA	NA
GO:0006939~smooth muscle contraction	NA	NA	NA	NA	NA	NA	NA	NA	NA	NA	NA	NA	NA	NA	NA	NA	NA	NA	NA	NA	NA	NA	NA	NA	5	0.0325144	1	NA	NA	NA
GO:0055074~calcium ion homeostasis	NA	NA	NA	NA	NA	NA	NA	NA	NA	NA	NA	NA	NA	NA	NA	NA	NA	NA	NA	NA	NA	NA	NA	NA	6	0.0334169	1	NA	NA	NA
GO:0035329~hippo signaling	NA	NA	NA	NA	NA	NA	NA	NA	NA	NA	NA	NA	NA	NA	NA	NA	NA	NA	NA	NA	NA	NA	NA	NA	6	0.0334169	1	NA	NA	NA
GO:0001673~male germ cell nucleus	NA	NA	NA	NA	NA	NA	NA	NA	NA	NA	NA	NA	NA	NA	NA	NA	NA	NA	NA	NA	NA	NA	NA	NA	5	0.0335319	0.933464	NA	NA	NA
GO:1902711~GABA-A receptor complex	NA	NA	NA	NA	NA	NA	NA	NA	NA	NA	NA	NA	NA	NA	NA	NA	NA	NA	NA	NA	NA	NA	NA	NA	5	0.0335319	0.933464	NA	NA	NA
GO:0004890~GABA-A receptor activity	NA	NA	NA	NA	NA	NA	NA	NA	NA	NA	NA	NA	NA	NA	NA	NA	NA	NA	NA	NA	NA	NA	NA	NA	5	0.0338062	1	NA	NA	NA
GO:0001657~ureteric bud development	NA	NA	NA	NA	NA	NA	NA	NA	NA	NA	NA	NA	NA	NA	NA	NA	NA	NA	NA	NA	NA	NA	NA	NA	8	0.0375807	1	NA	NA	NA
GO:0046686~response to cadmium ion	NA	NA	NA	NA	NA	NA	NA	NA	NA	NA	NA	NA	NA	NA	NA	NA	NA	NA	NA	NA	NA	NA	NA	NA	6	0.0398266	1	NA	NA	NA
GO:0051879~Hsp90 protein binding	NA	NA	NA	NA	NA	NA	NA	NA	NA	NA	NA	NA	NA	NA	NA	NA	NA	NA	NA	NA	NA	NA	NA	NA	7	0.044611	1	NA	NA	NA
GO:0042612~MHC class I protein complex	NA	NA	NA	NA	NA	NA	NA	NA	NA	NA	NA	NA	NA	NA	NA	NA	NA	NA	NA	NA	NA	NA	NA	NA	4	0.0471113	1	NA	NA	NA
GO:0008201~heparin binding	NA	NA	NA	NA	NA	NA	NA	NA	NA	NA	NA	NA	NA	NA	NA	NA	NA	NA	NA	NA	NA	NA	NA	NA	16	0.047298	1	NA	NA	NA
mmu03320:PPAR signaling pathway	NA	NA	NA	NA	NA	NA	NA	NA	NA	NA	NA	NA	NA	NA	NA	NA	NA	NA	NA	NA	NA	NA	NA	NA	9	0.0473793	1	NA	NA	NA
GO:0006821~chloride transport	NA	NA	NA	NA	NA	NA	NA	NA	NA	NA	NA	NA	NA	NA	NA	NA	NA	NA	NA	NA	NA	NA	NA	NA	10	0.0482468	1	NA	NA	NA
GO:0015012~heparan sulfate proteoglycan biosynthetic process	NA	NA	NA	NA	NA	NA	NA	NA	NA	NA	NA	NA	NA	NA	NA	NA	NA	NA	NA	NA	NA	NA	NA	NA	5	0.0495746	1	NA	NA	NA
GO:0007212~dopamine receptor signaling pathway	NA	NA	NA	NA	NA	NA	NA	NA	NA	NA	NA	NA	NA	NA	NA	NA	NA	NA	NA	NA	NA	NA	NA	NA	NA	NA	NA	9	7.09658e-06	0.00256328
GO:0051291~protein heterooligomerization	NA	NA	NA	NA	NA	NA	NA	NA	NA	NA	NA	NA	NA	NA	NA	NA	NA	NA	NA	NA	NA	NA	NA	NA	NA	NA	NA	17	0.00139791	0.168309
GO:1901385~regulation of voltage-gated calcium channel activity	NA	NA	NA	NA	NA	NA	NA	NA	NA	NA	NA	NA	NA	NA	NA	NA	NA	NA	NA	NA	NA	NA	NA	NA	NA	NA	NA	5	0.00175564	0.196965
GO:0035640~exploration behavior	NA	NA	NA	NA	NA	NA	NA	NA	NA	NA	NA	NA	NA	NA	NA	NA	NA	NA	NA	NA	NA	NA	NA	NA	NA	NA	NA	7	0.00179951	0.196965
GO:0046488~phosphatidylinositol metabolic process	NA	NA	NA	NA	NA	NA	NA	NA	NA	NA	NA	NA	NA	NA	NA	NA	NA	NA	NA	NA	NA	NA	NA	NA	NA	NA	NA	8	0.00298153	0.256412
GO:0016079~synaptic vesicle exocytosis	NA	NA	NA	NA	NA	NA	NA	NA	NA	NA	NA	NA	NA	NA	NA	NA	NA	NA	NA	NA	NA	NA	NA	NA	NA	NA	NA	7	0.00483407	0.371504
GO:0061337~cardiac conduction	NA	NA	NA	NA	NA	NA	NA	NA	NA	NA	NA	NA	NA	NA	NA	NA	NA	NA	NA	NA	NA	NA	NA	NA	NA	NA	NA	5	0.00546411	0.394727
GO:0008144~drug binding	NA	NA	NA	NA	NA	NA	NA	NA	NA	NA	NA	NA	NA	NA	NA	NA	NA	NA	NA	NA	NA	NA	NA	NA	NA	NA	NA	16	0.0067979	0.33835
GO:0050890~cognition	NA	NA	NA	NA	NA	NA	NA	NA	NA	NA	NA	NA	NA	NA	NA	NA	NA	NA	NA	NA	NA	NA	NA	NA	NA	NA	NA	9	0.00859525	0.526204
GO:0035255~ionotropic glutamate receptor binding	NA	NA	NA	NA	NA	NA	NA	NA	NA	NA	NA	NA	NA	NA	NA	NA	NA	NA	NA	NA	NA	NA	NA	NA	NA	NA	NA	8	0.00903505	0.405902
GO:0008331~high voltage-gated calcium channel activity	NA	NA	NA	NA	NA	NA	NA	NA	NA	NA	NA	NA	NA	NA	NA	NA	NA	NA	NA	NA	NA	NA	NA	NA	NA	NA	NA	5	0.00926716	0.405902
GO:0031226~intrinsic component of plasma membrane	NA	NA	NA	NA	NA	NA	NA	NA	NA	NA	NA	NA	NA	NA	NA	NA	NA	NA	NA	NA	NA	NA	NA	NA	NA	NA	NA	8	0.00929644	0.159202
GO:0032869~cellular response to insulin stimulus	NA	NA	NA	NA	NA	NA	NA	NA	NA	NA	NA	NA	NA	NA	NA	NA	NA	NA	NA	NA	NA	NA	NA	NA	NA	NA	NA	15	0.00935473	0.563155
GO:0019722~calcium-mediated signaling	NA	NA	NA	NA	NA	NA	NA	NA	NA	NA	NA	NA	NA	NA	NA	NA	NA	NA	NA	NA	NA	NA	NA	NA	NA	NA	NA	9	0.0102934	0.586567
GO:0051928~positive regulation of calcium ion transport	NA	NA	NA	NA	NA	NA	NA	NA	NA	NA	NA	NA	NA	NA	NA	NA	NA	NA	NA	NA	NA	NA	NA	NA	NA	NA	NA	7	0.0105556	0.586567
GO:0017075~syntaxin-1 binding	NA	NA	NA	NA	NA	NA	NA	NA	NA	NA	NA	NA	NA	NA	NA	NA	NA	NA	NA	NA	NA	NA	NA	NA	NA	NA	NA	7	0.0118937	0.498792
GO:0019871~sodium channel inhibitor activity	NA	NA	NA	NA	NA	NA	NA	NA	NA	NA	NA	NA	NA	NA	NA	NA	NA	NA	NA	NA	NA	NA	NA	NA	NA	NA	NA	4	0.012299	0.498792
GO:0045944~positive regulation of transcription from RNA polymerase II promoter	NA	NA	NA	NA	NA	NA	NA	NA	NA	NA	NA	NA	NA	NA	NA	NA	NA	NA	NA	NA	NA	NA	NA	NA	NA	NA	NA	90	0.0123738	0.630048
GO:0031072~heat shock protein binding	NA	NA	NA	NA	NA	NA	NA	NA	NA	NA	NA	NA	NA	NA	NA	NA	NA	NA	NA	NA	NA	NA	NA	NA	NA	NA	NA	11	0.0135853	0.531282
GO:0060292~long term synaptic depression	NA	NA	NA	NA	NA	NA	NA	NA	NA	NA	NA	NA	NA	NA	NA	NA	NA	NA	NA	NA	NA	NA	NA	NA	NA	NA	NA	6	0.0138344	0.684518
GO:0035094~response to nicotine	NA	NA	NA	NA	NA	NA	NA	NA	NA	NA	NA	NA	NA	NA	NA	NA	NA	NA	NA	NA	NA	NA	NA	NA	NA	NA	NA	8	0.0143117	0.698566
GO:0007611~learning or memory	NA	NA	NA	NA	NA	NA	NA	NA	NA	NA	NA	NA	NA	NA	NA	NA	NA	NA	NA	NA	NA	NA	NA	NA	NA	NA	NA	10	0.0161099	0.775853
GO:0000149~SNARE binding	NA	NA	NA	NA	NA	NA	NA	NA	NA	NA	NA	NA	NA	NA	NA	NA	NA	NA	NA	NA	NA	NA	NA	NA	NA	NA	NA	12	0.016555	0.565472
GO:0046983~protein dimerization activity	NA	NA	NA	NA	NA	NA	NA	NA	NA	NA	NA	NA	NA	NA	NA	NA	NA	NA	NA	NA	NA	NA	NA	NA	NA	NA	NA	22	0.0170416	0.565472
GO:0048148~behavioral response to cocaine	NA	NA	NA	NA	NA	NA	NA	NA	NA	NA	NA	NA	NA	NA	NA	NA	NA	NA	NA	NA	NA	NA	NA	NA	NA	NA	NA	6	0.0177811	0.802815
GO:1903861~positive regulation of dendrite extension	NA	NA	NA	NA	NA	NA	NA	NA	NA	NA	NA	NA	NA	NA	NA	NA	NA	NA	NA	NA	NA	NA	NA	NA	NA	NA	NA	6	0.0177811	0.802815
GO:2000641~regulation of early endosome to late endosome transport	NA	NA	NA	NA	NA	NA	NA	NA	NA	NA	NA	NA	NA	NA	NA	NA	NA	NA	NA	NA	NA	NA	NA	NA	NA	NA	NA	4	0.0187386	0.82541
GO:0016323~basolateral plasma membrane	NA	NA	NA	NA	NA	NA	NA	NA	NA	NA	NA	NA	NA	NA	NA	NA	NA	NA	NA	NA	NA	NA	NA	NA	NA	NA	NA	24	0.0187594	0.273409
GO:0030218~erythrocyte differentiation	NA	NA	NA	NA	NA	NA	NA	NA	NA	NA	NA	NA	NA	NA	NA	NA	NA	NA	NA	NA	NA	NA	NA	NA	NA	NA	NA	9	0.0196247	0.846677
GO:0016308~1-phosphatidylinositol-4-phosphate 5-kinase activity	NA	NA	NA	NA	NA	NA	NA	NA	NA	NA	NA	NA	NA	NA	NA	NA	NA	NA	NA	NA	NA	NA	NA	NA	NA	NA	NA	4	0.0200744	0.610597
GO:0042321~negative regulation of circadian sleep/wake cycle, sleep	NA	NA	NA	NA	NA	NA	NA	NA	NA	NA	NA	NA	NA	NA	NA	NA	NA	NA	NA	NA	NA	NA	NA	NA	NA	NA	NA	3	0.0223512	0.90929
GO:0042311~vasodilation	NA	NA	NA	NA	NA	NA	NA	NA	NA	NA	NA	NA	NA	NA	NA	NA	NA	NA	NA	NA	NA	NA	NA	NA	NA	NA	NA	6	0.022405	0.90929
GO:0051899~membrane depolarization	NA	NA	NA	NA	NA	NA	NA	NA	NA	NA	NA	NA	NA	NA	NA	NA	NA	NA	NA	NA	NA	NA	NA	NA	NA	NA	NA	6	0.022405	0.90929
GO:0001963~synaptic transmission, dopaminergic	NA	NA	NA	NA	NA	NA	NA	NA	NA	NA	NA	NA	NA	NA	NA	NA	NA	NA	NA	NA	NA	NA	NA	NA	NA	NA	NA	5	0.0232462	0.912668
GO:0010738~regulation of protein kinase A signaling	NA	NA	NA	NA	NA	NA	NA	NA	NA	NA	NA	NA	NA	NA	NA	NA	NA	NA	NA	NA	NA	NA	NA	NA	NA	NA	NA	5	0.0232462	0.912668
GO:0004719~protein-L-isoaspartate (D-aspartate) O-methyltransferase activity	NA	NA	NA	NA	NA	NA	NA	NA	NA	NA	NA	NA	NA	NA	NA	NA	NA	NA	NA	NA	NA	NA	NA	NA	NA	NA	NA	3	0.0234764	0.67649
GO:0045599~negative regulation of fat cell differentiation	NA	NA	NA	NA	NA	NA	NA	NA	NA	NA	NA	NA	NA	NA	NA	NA	NA	NA	NA	NA	NA	NA	NA	NA	NA	NA	NA	9	0.0260487	1
GO:0043565~sequence-specific DNA binding	NA	NA	NA	NA	NA	NA	NA	NA	NA	NA	NA	NA	NA	NA	NA	NA	NA	NA	NA	NA	NA	NA	NA	NA	NA	NA	NA	50	0.0260604	0.700608
mmu05223:Non-small cell lung cancer	NA	NA	NA	NA	NA	NA	NA	NA	NA	NA	NA	NA	NA	NA	NA	NA	NA	NA	NA	NA	NA	NA	NA	NA	NA	NA	NA	11	0.02687	0.190329
GO:0004842~ubiquitin-protein transferase activity	NA	NA	NA	NA	NA	NA	NA	NA	NA	NA	NA	NA	NA	NA	NA	NA	NA	NA	NA	NA	NA	NA	NA	NA	NA	NA	NA	39	0.0275217	0.700844
GO:0060079~excitatory postsynaptic potential	NA	NA	NA	NA	NA	NA	NA	NA	NA	NA	NA	NA	NA	NA	NA	NA	NA	NA	NA	NA	NA	NA	NA	NA	NA	NA	NA	8	0.0277378	1
GO:0001964~startle response	NA	NA	NA	NA	NA	NA	NA	NA	NA	NA	NA	NA	NA	NA	NA	NA	NA	NA	NA	NA	NA	NA	NA	NA	NA	NA	NA	6	0.0277421	1
GO:1903078~positive regulation of protein localization to plasma membrane	NA	NA	NA	NA	NA	NA	NA	NA	NA	NA	NA	NA	NA	NA	NA	NA	NA	NA	NA	NA	NA	NA	NA	NA	NA	NA	NA	4	0.0280231	1
GO:0060346~bone trabecula formation	NA	NA	NA	NA	NA	NA	NA	NA	NA	NA	NA	NA	NA	NA	NA	NA	NA	NA	NA	NA	NA	NA	NA	NA	NA	NA	NA	4	0.0280231	1
GO:0018095~protein polyglutamylation	NA	NA	NA	NA	NA	NA	NA	NA	NA	NA	NA	NA	NA	NA	NA	NA	NA	NA	NA	NA	NA	NA	NA	NA	NA	NA	NA	4	0.0280231	1
GO:0016307~phosphatidylinositol phosphate kinase activity	NA	NA	NA	NA	NA	NA	NA	NA	NA	NA	NA	NA	NA	NA	NA	NA	NA	NA	NA	NA	NA	NA	NA	NA	NA	NA	NA	4	0.0299681	0.703668
GO:0014059~regulation of dopamine secretion	NA	NA	NA	NA	NA	NA	NA	NA	NA	NA	NA	NA	NA	NA	NA	NA	NA	NA	NA	NA	NA	NA	NA	NA	NA	NA	NA	5	0.0303036	1
GO:0021766~hippocampus development	NA	NA	NA	NA	NA	NA	NA	NA	NA	NA	NA	NA	NA	NA	NA	NA	NA	NA	NA	NA	NA	NA	NA	NA	NA	NA	NA	12	0.0334413	1
GO:0010506~regulation of autophagy	NA	NA	NA	NA	NA	NA	NA	NA	NA	NA	NA	NA	NA	NA	NA	NA	NA	NA	NA	NA	NA	NA	NA	NA	NA	NA	NA	9	0.0338061	1
GO:0030027~lamellipodium	NA	NA	NA	NA	NA	NA	NA	NA	NA	NA	NA	NA	NA	NA	NA	NA	NA	NA	NA	NA	NA	NA	NA	NA	NA	NA	NA	22	0.0357045	0.465029
GO:0000139~Golgi membrane	NA	NA	NA	NA	NA	NA	NA	NA	NA	NA	NA	NA	NA	NA	NA	NA	NA	NA	NA	NA	NA	NA	NA	NA	NA	NA	NA	45	0.0376841	0.469338
GO:0032591~dendritic spine membrane	NA	NA	NA	NA	NA	NA	NA	NA	NA	NA	NA	NA	NA	NA	NA	NA	NA	NA	NA	NA	NA	NA	NA	NA	NA	NA	NA	4	0.0384361	0.470156
GO:2000310~regulation of N-methyl-D-aspartate selective glutamate receptor activity	NA	NA	NA	NA	NA	NA	NA	NA	NA	NA	NA	NA	NA	NA	NA	NA	NA	NA	NA	NA	NA	NA	NA	NA	NA	NA	NA	5	0.038488	1
GO:0032230~positive regulation of synaptic transmission, GABAergic	NA	NA	NA	NA	NA	NA	NA	NA	NA	NA	NA	NA	NA	NA	NA	NA	NA	NA	NA	NA	NA	NA	NA	NA	NA	NA	NA	5	0.038488	1
GO:0030018~Z disc	NA	NA	NA	NA	NA	NA	NA	NA	NA	NA	NA	NA	NA	NA	NA	NA	NA	NA	NA	NA	NA	NA	NA	NA	NA	NA	NA	16	0.0392306	0.471455
GO:0086002~cardiac muscle cell action potential involved in contraction	NA	NA	NA	NA	NA	NA	NA	NA	NA	NA	NA	NA	NA	NA	NA	NA	NA	NA	NA	NA	NA	NA	NA	NA	NA	NA	NA	4	0.0393025	1
GO:1902188~positive regulation of viral release from host cell	NA	NA	NA	NA	NA	NA	NA	NA	NA	NA	NA	NA	NA	NA	NA	NA	NA	NA	NA	NA	NA	NA	NA	NA	NA	NA	NA	4	0.0393025	1
mmu04919:Thyroid hormone signaling pathway	NA	NA	NA	NA	NA	NA	NA	NA	NA	NA	NA	NA	NA	NA	NA	NA	NA	NA	NA	NA	NA	NA	NA	NA	NA	NA	NA	17	0.040703	0.27005
mmu05213:Endometrial cancer	NA	NA	NA	NA	NA	NA	NA	NA	NA	NA	NA	NA	NA	NA	NA	NA	NA	NA	NA	NA	NA	NA	NA	NA	NA	NA	NA	10	0.0413018	0.27005
GO:0005955~calcineurin complex	NA	NA	NA	NA	NA	NA	NA	NA	NA	NA	NA	NA	NA	NA	NA	NA	NA	NA	NA	NA	NA	NA	NA	NA	NA	NA	NA	3	0.041398	0.472628
GO:0019905~syntaxin binding	NA	NA	NA	NA	NA	NA	NA	NA	NA	NA	NA	NA	NA	NA	NA	NA	NA	NA	NA	NA	NA	NA	NA	NA	NA	NA	NA	13	0.0418963	0.873616
GO:0007189~adenylate cyclase-activating G-protein coupled receptor signaling pathway	NA	NA	NA	NA	NA	NA	NA	NA	NA	NA	NA	NA	NA	NA	NA	NA	NA	NA	NA	NA	NA	NA	NA	NA	NA	NA	NA	8	0.0421404	1
GO:0005085~guanyl-nucleotide exchange factor activity	NA	NA	NA	NA	NA	NA	NA	NA	NA	NA	NA	NA	NA	NA	NA	NA	NA	NA	NA	NA	NA	NA	NA	NA	NA	NA	NA	22	0.0431047	0.873616
mmu05219:Bladder cancer	NA	NA	NA	NA	NA	NA	NA	NA	NA	NA	NA	NA	NA	NA	NA	NA	NA	NA	NA	NA	NA	NA	NA	NA	NA	NA	NA	8	0.0431911	0.275343
GO:0001965~G-protein alpha-subunit binding	NA	NA	NA	NA	NA	NA	NA	NA	NA	NA	NA	NA	NA	NA	NA	NA	NA	NA	NA	NA	NA	NA	NA	NA	NA	NA	NA	7	0.0438803	0.873616
GO:0048786~presynaptic active zone	NA	NA	NA	NA	NA	NA	NA	NA	NA	NA	NA	NA	NA	NA	NA	NA	NA	NA	NA	NA	NA	NA	NA	NA	NA	NA	NA	7	0.0441675	0.495979
GO:0043087~regulation of GTPase activity	NA	NA	NA	NA	NA	NA	NA	NA	NA	NA	NA	NA	NA	NA	NA	NA	NA	NA	NA	NA	NA	NA	NA	NA	NA	NA	NA	12	0.0442553	1
mmu04010:MAPK signaling pathway	NA	NA	NA	NA	NA	NA	NA	NA	NA	NA	NA	NA	NA	NA	NA	NA	NA	NA	NA	NA	NA	NA	NA	NA	NA	NA	NA	30	0.044822	0.278771
GO:0006464~cellular protein modification process	NA	NA	NA	NA	NA	NA	NA	NA	NA	NA	NA	NA	NA	NA	NA	NA	NA	NA	NA	NA	NA	NA	NA	NA	NA	NA	NA	8	0.0478452	1
