# Supplementary material for: Histone deacetylase knockouts modify transcription, CAG instability and nuclear pathology in Huntington disease mice
Source: eLife. 2020 Sep 29;9:e55911. doi: 10.7554/eLife.55911 (PMC7581428; doi:10.7554/eLife.55911)
Supplement: Source data 4. [file elife-55911-data4.xlsx]

## Sheet: 1271_DEGs
Differentially expressed genes represented in contrast 3 and contrast 2 (columns A-K). Resuts of unpaired t-test comparing expression levels in Htt+/+ Hdac2 WT vs. HttQ111/+ Hdac2 KO (columns L-Q)
	HttQ111/+ vs Htt+/+ in Hdac2 WT (contrast 3)					Hdac2 KO vs Hdac2 WT in HttQ111/+ (contrast 2)					Htt+/+ Hdac2 WT vs HttQ111/+ Hdac2 KO
id	logFC	logCPM	F	Pvalue	BH	logFC	logCPM	F	Pvalue	BH	mean_httwt_hdac2wt	mean_httq111_hdac2ko	log2FC	t_statistic	pvalue	BH
1110008L16Rik|ENSMUSG00000021023	-0.221856	2.85881	7.91203	0.0231496	0.531139	0.282922	2.85873	15.25	0.00190186	0.0226679	7.19695	7.49714	-0.058955	-1.77217	0.0944638	0.163521
1110017D15Rik|ENSMUSG00000028441	0.432711	0.707863	7.16864	0.0175831	0.502597	0.688482	0.707715	23.1171	4.06397e-05	0.00109219	0.996495	2.15052	-1.10975	-10.6366	8.55195e-09	3.33468e-07
1110032A03Rik|ENSMUSG00000037971	0.1373	4.88966	9.46019	0.0249183	0.544738	-0.0670319	4.88957	2.70954	0.238834	0.550969	28.2765	29.7314	-0.0723849	-4.30074	0.000781235	0.00320813
1110034G24Rik|ENSMUSG00000044991	-0.218385	2.49874	4.95097	0.0393895	0.618556	-0.156953	2.49855	2.88161	0.117074	0.37403	6.68458	5.15855	0.373872	6.9546	3.84087e-06	4.06879e-05
1500009L16Rik|ENSMUSG00000087651	0.179647	3.81581	4.82701	0.0359242	0.608365	0.98801	3.81614	172.329	6.37629e-14	1.36891e-10	8.28627	18.0304	-1.12164	-24.0814	1.68786e-14	4.60027e-11
1500017E21Rik|ENSMUSG00000087579	-0.431682	0.545956	4.40905	0.0443121	0.640359	-0.336019	0.545807	3.24757	0.0816527	0.301329	2.00272	1.19834	0.740918	7.45229	7.34657e-06	6.90187e-05
1700001O22Rik|ENSMUSG00000044320	-0.43937	1.60562	8.27923	0.00734002	0.326059	-0.426284	1.60566	8.59648	0.0064139	0.0549694	4.16941	2.39765	0.798223	9.94973	1.78761e-08	5.79786e-07
1700034H15Rik|ENSMUSG00000055833	-0.367446	1.93496	7.90546	0.00862689	0.35628	-0.00570205	1.93491	0.00222353	0.962705	0.989495	4.55174	3.60463	0.336569	4.26506	0.000958112	0.00378102
2010001M06Rik|ENSMUSG00000085042	-0.450661	4.19796	9.30904	0.00475436	0.281955	0.686841	4.19844	24.9075	2.43069e-05	0.000733693	17.1162	20.4528	-0.256938	-5.09143	0.000145518	0.000804919
2210404O07Rik|ENSMUSG00000078439	0.850975	-0.531765	12.5296	0.00133587	0.157035	0.142069	-0.531908	0.43264	0.520635	0.789084	0.360824	0.774353	-1.1017	-6.53696	4.83895e-05	0.000320723
2610008E11Rik|ENSMUSG00000060301	0.129247	5.52497	6.0141	0.0202624	0.509953	0.0515233	5.52487	1.1303	0.296339	0.611292	41.8669	47.8278	-0.192041	-5.48002	0.000105095	0.000614218
2610018G03Rik|ENSMUSG00000031112	-0.103902	5.62354	5.18844	0.0438432	0.638081	-0.177228	5.62352	17.2812	0.000250044	0.00466794	55.3518	45.3653	0.287042	11.1189	5.38786e-09	2.36684e-07
2700029M09Rik|ENSMUSG00000038005	-0.124787	5.56277	8.14435	0.0169761	0.499919	0.0943464	5.56283	5.34264	0.0546892	0.236056	48.8193	47.8634	0.0285276	1.10917	0.285426	0.396058
2700049A03Rik|ENSMUSG00000034601	0.196378	3.34083	9.09183	0.0209169	0.517309	-0.14057	3.3408	5.3369	0.0779761	0.29305	9.37554	9.80822	-0.0650882	-1.77417	0.0949255	0.164222
3110009E18Rik|ENSMUSG00000026388	-0.360629	0.715593	6.55872	0.042777	0.633368	0.236052	0.715472	3.3152	0.152557	0.431232	1.73645	1.6026	0.115726	1.52712	0.146524	0.234157
3110021A11Rik|ENSMUSG00000050604	1.21325	-2.3926	5.15571	0.0305559	0.575172	0.18821	-2.39255	0.185778	0.669555	0.87076	0.10367	0.21274	-1.03709	-2.94266	0.00971236	0.0256006
4632427E13Rik|ENSMUSG00000074024	-0.218235	2.58742	4.31292	0.0465349	0.65589	-0.196151	2.58716	4.08848	0.0522333	0.229667	7.20634	5.44679	0.403861	4.78876	0.00110802	0.00426455
4833418N02Rik|ENSMUSG00000085287	-0.397748	1.33252	9.50357	0.00683402	0.316052	0.203308	1.3325	2.77907	0.143176	0.418066	2.8782	2.51889	0.192376	2.29454	0.0384953	0.0794635
4833422M21Rik|ENSMUSG00000097619	0.802711	-1.43015	8.59751	0.00784673	0.338754	0.247212	-1.43007	1.02026	0.362075	0.674222	0.178054	0.422154	-1.24545	-6.1433	1.11431e-05	9.77528e-05
4921536K21Rik|ENSMUSG00000020434	-0.580363	-1.02089	5.34516	0.0278678	0.56264	-0.104488	-1.02109	0.204438	0.666697	0.869265	0.626071	0.415225	0.592432	4.6257	0.000951195	0.00376142
4930422G04Rik|ENSMUSG00000051278	0.195017	3.06187	6.3059	0.0344602	0.597761	-0.118454	3.06191	2.69469	0.165838	0.452105	7.81622	8.28765	-0.0844928	-2.38231	0.0387319	0.0798665
4930441O14Rik|ENSMUSG00000044081	0.396935	1.40528	14.2529	0.00646669	0.307016	0.173398	1.40525	3.30662	0.19187	0.490602	2.00684	2.9825	-0.5716	-12.172	2.1989e-09	1.26365e-07
4930539E08Rik|ENSMUSG00000048905	-0.29108	2.05248	4.9253	0.0342172	0.597761	0.491176	2.05284	15.6708	0.000431507	0.00719887	3.69432	4.12606	-0.159458	-1.80453	0.0910507	0.158961
4932442L08Rik|ENSMUSG00000043549	-0.547236	-0.162556	4.57155	0.0408173	0.624614	0.332053	-0.16247	1.94365	0.173581	0.464441	1.02508	0.9118	0.168952	1.4917	0.157903	0.248446
5033417F24Rik|ENSMUSG00000097251	0.336634	0.713804	4.52148	0.0493137	0.66942	-0.554624	0.713711	13.9566	0.000790618	0.0115663	1.76657	1.49072	0.244945	2.29863	0.0351808	0.0737712
5033430I15Rik|ENSMUSG00000038152	-0.501761	1.22089	8.8872	0.00566951	0.297155	-0.0170194	1.22091	0.0117621	0.914363	0.971794	2.93884	2.08429	0.495688	3.92082	0.00193044	0.00669537
5330413P13Rik|ENSMUSG00000086822	0.978166	0.489222	16.5069	0.000323708	0.0761584	0.785551	0.489322	14.0172	0.000773501	0.0113838	0.563944	1.81407	-1.6856	-9.55851	1.2132e-07	2.47372e-06
5330417C22Rik|ENSMUSG00000040412	-0.106669	6.51675	4.46332	0.0431094	0.633664	0.0314377	6.51686	0.426706	0.518617	0.788183	94.1029	89.5906	0.0708921	2.39838	0.0282304	0.0613545
5730455P16Rik|ENSMUSG00000057181	0.100126	6.37872	8.61219	0.0320686	0.583701	0.000948379	6.37863	0.000877759	0.982695	0.995446	78.9836	84.8704	-0.103709	-6.2127	1.72109e-05	0.000138325
6030419C18Rik|ENSMUSG00000066607	-0.141608	7.80258	4.79255	0.0365447	0.611985	-0.0453876	7.80277	0.553054	0.462895	0.749898	240.079	213.259	0.170903	4.49685	0.000441395	0.00202247
6330403A02Rik|ENSMUSG00000053963	0.116799	7.65031	6.40138	0.0169209	0.499151	-0.161696	7.65022	13.7146	0.00086306	0.012425	201.812	196.331	0.0397219	1.26486	0.226732	0.329584
6330403N20Rik|ENSMUSG00000097912	1.26781	-2.44464	7.15107	0.012035	0.42821	-0.0899996	-2.44444	0.0423747	0.838307	0.943154	0.0598809	0.160195	-1.41966	-3.84255	0.00143317	0.00526093
6330562C20Rik|ENSMUSG00000093424	1.07806	-2.05159	6.29453	0.0177782	0.503636	0.209238	-2.05174	0.321742	0.57481	0.820714	0.0990828	0.260577	-1.395	-4.79841	0.000218747	0.00112199
6530409C15Rik|ENSMUSG00000043340	-0.531543	-0.991254	4.66892	0.0499642	0.669569	0.22937	-0.991334	1.04284	0.355597	0.667536	0.547378	0.452067	0.276	1.9864	0.0642181	0.120284
9330160F10Rik|ENSMUSG00000072809	0.411308	0.334841	7.29926	0.032993	0.587804	-0.217073	0.334726	2.47915	0.21691	0.522795	1.09485	1.22648	-0.163789	-1.91749	0.0761205	0.137645
9430020K01Rik|ENSMUSG00000033960	-0.137464	8.72681	6.99957	0.0128822	0.444243	-0.226632	8.72687	21.9398	5.75726e-05	0.00145413	494.853	383.362	0.368293	16.4213	6.39643e-10	5.11479e-08
9930014A18Rik|ENSMUSG00000097493	-0.251086	2.6522	8.157	0.013756	0.456024	-0.210164	2.65202	6.74817	0.0266576	0.148074	7.60328	5.54099	0.456476	8.66405	2.3381e-07	4.24379e-06
A2m|ENSMUSG00000030111	-0.547082	0.311514	4.34162	0.0458586	0.650099	0.143797	0.311351	0.357806	0.554246	0.807052	1.53962	1.16032	0.408049	2.38169	0.0293403	0.063354
A330021E22Rik|ENSMUSG00000040473	0.197731	4.044	8.44782	0.00815558	0.344282	0.293628	4.04408	21.5557	6.46218e-05	0.00160156	13.0984	18.5827	-0.504567	-11.4134	1.02907e-06	1.40491e-05
A330102I10Rik|ENSMUSG00000086363	0.250415	1.89916	5.90337	0.0461911	0.653732	-0.0068223	1.89914	0.00521001	0.95306	0.98565	3.1921	3.81886	-0.258637	-4.52541	0.000302067	0.00146943
A3galt2|ENSMUSG00000028794	0.84443	-1.22051	6.33642	0.0174365	0.500628	0.077211	-1.22052	0.0681339	0.795869	0.926634	0.248309	0.497168	-1.0016	-6.69591	1.16679e-05	0.000101485
A530053G22Rik|ENSMUSG00000046764	1.15478	-1.11197	5.12722	0.0309843	0.577846	0.347045	-1.11225	0.70002	0.409436	0.711068	0.307143	0.559994	-0.866501	-2.68037	0.0159707	0.0385697
A730046J19Rik|ENSMUSG00000085139	-0.781778	-1.26743	4.54737	0.0413175	0.628341	0.387143	-1.26735	1.14869	0.292426	0.606992	0.459629	0.342986	0.422319	2.0335	0.0626993	0.118054
A730085K08Rik|ENSMUSG00000093598	-0.425479	1.46519	9.58088	0.00425	0.269781	-0.114216	1.46501	0.789102	0.388244	0.69635	3.55428	2.427	0.550383	4.89594	0.000845032	0.00341635
A830073O21Rik|ENSMUSG00000091890	-0.198922	3.52174	5.16177	0.0304657	0.575172	-0.381284	3.52154	21.9817	5.68558e-05	0.00144026	14.347	9.70258	0.564313	10.5515	2.35752e-08	7.14259e-07
A930015D03Rik|ENSMUSG00000092368	-1.51193	0.447614	16.5538	0.000318612	0.0761584	0.0715321	0.447908	0.0383407	0.846089	0.946437	2.72191	0.481151	2.50006	5.20472	0.000258977	0.0012902
AB041806|ENSMUSG00000046109	-0.365817	0.887366	4.95168	0.0337744	0.596763	-0.157635	0.887217	1.05551	0.312508	0.626513	2.26462	1.56581	0.532358	5.51183	5.06222e-05	0.000333104
Abca3|ENSMUSG00000024130	-0.148504	6.74472	9.33577	0.00470201	0.280794	0.00423214	6.74476	0.00831333	0.927962	0.976589	114.438	103.382	0.146579	4.19036	0.000653161	0.0027799
Abca5|ENSMUSG00000018800	-0.0984726	5.99603	6.29045	0.0420668	0.631654	-0.019541	5.99594	0.283274	0.666275	0.869265	68.2903	63.0853	0.114376	6.32351	1.24259e-05	0.00010674
Abca8a|ENSMUSG00000041828	-0.331893	5.02245	10.1114	0.00342427	0.240527	0.356016	5.02233	12.3368	0.00143789	0.0183612	33.2964	34.2199	-0.0394666	-0.636068	0.534023	0.640606
Abcb10|ENSMUSG00000031974	0.167251	5.11432	12.5213	0.00407633	0.266658	0.261531	5.11439	35.9312	1.50595e-06	7.38989e-05	28.3022	38.0466	-0.426851	-17.8004	8.5447e-12	2.49595e-09
Abcc6|ENSMUSG00000030834	-0.452287	0.418432	4.64314	0.0393755	0.618556	-0.0313489	0.41847	0.0243195	0.877126	0.957993	1.62206	1.21399	0.418077	3.69229	0.00181156	0.00635806
Abcd1|ENSMUSG00000031378	0.180042	3.87618	8.61913	0.0189577	0.508495	-0.0700935	3.87625	1.5156	0.329628	0.642534	13.6561	14.7687	-0.112996	-3.61641	0.00245665	0.00817095
Abcg3|ENSMUSG00000029299	-0.726896	-0.414248	10.7262	0.00267799	0.212448	-0.0025754	-0.414295	0.000148042	0.990646	0.996948	1.04328	0.617704	0.756134	6.67273	4.06983e-06	4.25932e-05
Abhd14a|ENSMUSG00000042210	0.358266	4.59052	6.49027	0.016242	0.496206	-0.475847	4.59047	13.2938	0.0010066	0.0140328	23.963	21.9586	0.126025	1.66142	0.115719	0.193359
Abi1|ENSMUSG00000058835	-0.114655	7.36494	10.9691	0.0102868	0.394329	-0.0266798	7.36492	0.685724	0.521906	0.789687	175.718	158.959	0.144612	9.38686	4.35357e-08	1.1292e-06
Ablim1|ENSMUSG00000025085	0.124815	6.17818	8.77586	0.00931588	0.3748	0.00776777	6.17819	0.0394955	0.862211	0.952951	68.3408	74.6179	-0.126774	-4.20371	0.000669693	0.00283846
Acat2|ENSMUSG00000023832	-0.120734	5.17511	4.58956	0.0404493	0.623461	-0.17073	5.17508	10.0731	0.00348022	0.0353476	40.936	33.424	0.292486	7.32326	5.38769e-06	5.37901e-05
Actr2|ENSMUSG00000020152	-0.0931236	8.77701	7.50027	0.0388902	0.616068	-0.0106296	8.77693	0.114962	0.801142	0.928888	461.911	429.796	0.103963	5.45261	0.000297576	0.00145043
Actr3|ENSMUSG00000026341	-0.10412	7.64182	6.08524	0.0204515	0.513203	0.0637836	7.64182	2.62173	0.127928	0.392771	205.168	199.36	0.0414317	2.02434	0.0691639	0.127579
Acvr1c|ENSMUSG00000026834	-0.280038	7.09807	11.648	0.00186819	0.181926	-0.197445	7.09801	6.94282	0.0132215	0.0918945	168.086	119.918	0.487159	10.0989	4.9328e-08	1.23512e-06
Acvr2a|ENSMUSG00000052155	0.166373	4.1845	6.63292	0.0199945	0.509232	-0.00317053	4.18431	0.00276743	0.961806	0.989139	16.5037	18.7088	-0.180932	-3.90182	0.0022142	0.00748506
Acvrl1|ENSMUSG00000000530	-0.307699	6.20655	13.3555	0.000982989	0.134641	0.242767	6.2068	9.5359	0.00433215	0.0415469	78.7713	75.3508	0.0640478	2.12838	0.0482675	0.0954786
Acy1|ENSMUSG00000023262	-0.177485	4.60842	5.34683	0.0278453	0.56264	-0.18406	4.60839	6.69934	0.0147651	0.0992341	28.5248	22.3699	0.350661	6.98922	4.04156e-06	4.23998e-05
Adamts19|ENSMUSG00000053441	0.809374	-0.171708	8.25662	0.00741165	0.327392	0.991802	-0.171532	16.0267	0.000381778	0.00652441	0.319823	1.18807	-1.89328	-13.3837	2.82552e-10	2.95352e-08
Adamts6|ENSMUSG00000046169	0.315194	2.68387	8.27797	0.00734399	0.326059	0.369518	2.68398	12.5544	0.00132477	0.0172633	4.58756	7.50489	-0.710105	-13.3329	3.82751e-10	3.53271e-08
Adcy5|ENSMUSG00000022840	-0.215161	10.6773	13.7972	0.000836615	0.128231	-0.00218587	10.6775	0.0016104	0.968257	0.991314	1763.25	1524.99	0.209439	7.50843	1.20086e-06	1.59649e-05
Adora2a|ENSMUSG00000020178	-0.318462	8.59612	14.459	0.000659396	0.111895	0.0283556	8.5963	0.132173	0.718756	0.894992	434.635	359.704	0.272996	5.7408	7.54551e-05	0.000464125
Adra2c|ENSMUSG00000045318	-0.134785	5.27207	6.54605	0.0158312	0.490598	-0.403417	5.27207	66.2582	4.58708e-09	6.73359e-07	47.2582	32.7096	0.530849	17.5065	1.33063e-11	3.27426e-09
Adrbk1|ENSMUSG00000024858	0.0983987	6.77975	6.75656	0.0302303	0.575172	0.0378492	6.77983	1.14063	0.375591	0.684577	102.562	112.777	-0.136971	-5.57285	8.15335e-05	0.000494156
Afap1|ENSMUSG00000029094	0.138927	4.81995	10.2661	0.0249061	0.544738	0.102173	4.82014	6.31722	0.0798256	0.297467	25.0799	29.9414	-0.255607	-11.2131	2.31679e-08	7.05281e-07
Agfg2|ENSMUSG00000029722	-0.142196	6.13011	9.54163	0.00431912	0.270077	0.0148497	6.13016	0.117874	0.741212	0.90427	74.9316	68.5364	0.128705	6.06713	6.66192e-05	0.00041944
Aggf1|ENSMUSG00000021681	-0.0970407	6.20795	11.9119	0.041554	0.630818	0.0347335	6.20795	1.77491	0.436612	0.732807	76.9692	73.7411	0.0618119	5.33157	5.56727e-05	0.000361134
Ago4|ENSMUSG00000042500	-0.236937	5.67394	6.97377	0.0130329	0.445849	0.239103	5.67431	8.10669	0.00791021	0.0639031	51.5469	52.9983	-0.0400601	-0.691527	0.499375	0.609762
AI182371|ENSMUSG00000035875	-0.783421	-1.75115	4.76395	0.0370687	0.612374	0.946087	-1.75134	8.63774	0.00630263	0.0543685	0.250151	0.29071	-0.21678	-1.08089	0.296645	0.408198
AI317395|ENSMUSG00000038522	-0.740706	-0.845467	7.92386	0.0085581	0.354673	0.385784	-0.845553	2.5296	0.122281	0.383252	0.660865	0.521503	0.341681	3.29135	0.00497906	0.0147641
AI593442|ENSMUSG00000078307	-0.169426	8.67585	6.70555	0.0147177	0.467991	-0.241787	8.67575	16.5743	0.000316881	0.00564568	491.69	368.603	0.415682	11.1665	6.59979e-07	9.87238e-06
AI597468|ENSMUSG00000060935	-0.0980933	6.32035	5.07447	0.0379308	0.614628	0.135194	6.32043	11.2638	0.00217001	0.0249631	78.6065	81.1385	-0.0457386	-1.55213	0.144131	0.231079
AK129341|ENSMUSG00000040729	-0.111276	5.38157	4.18796	0.0496121	0.66942	-0.00423029	5.38155	0.00715315	0.933164	0.978754	44.3924	40.8464	0.120103	3.48696	0.00679894	0.0190868
Ak8|ENSMUSG00000026807	0.599685	0.232831	9.90857	0.00371752	0.251836	0.135668	0.232818	0.603975	0.465002	0.750533	0.76431	1.31054	-0.777932	-7.32235	1.62519e-06	2.04944e-05
Akt2|ENSMUSG00000004056	-0.108142	6.65518	6.88606	0.018917	0.508495	0.0566519	6.65535	2.09845	0.187885	0.485691	102.655	98.9749	0.0526703	3.04677	0.00746931	0.0206447
Alas1|ENSMUSG00000032786	-0.121191	5.42384	9.08404	0.0247382	0.544738	0.0341727	5.42374	0.87016	0.496903	0.774227	45.0526	42.4969	0.0842509	3.25317	0.00481293	0.0143322
Aldh7a1|ENSMUSG00000053644	0.154842	6.56212	4.78339	0.0367116	0.611985	-0.152682	6.56218	5.29711	0.0285316	0.154828	91.9593	92.3754	-0.0065133	-0.155147	0.879097	0.915172
Aldoart2|ENSMUSG00000063129	-0.764189	-0.946131	9.41261	0.00455498	0.275125	0.192949	-0.946227	0.652429	0.441451	0.736705	0.650204	0.441679	0.557893	4.33156	0.00092692	0.00368728
Alpk3|ENSMUSG00000038763	0.924145	-0.991137	6.90193	0.0134625	0.452527	-0.0520175	-0.991324	0.030124	0.863383	0.953362	0.386774	0.50764	-0.392315	-1.56338	0.143159	0.229797
Alyref2|ENSMUSG00000060244	-0.337234	1.37226	11.2366	0.0201879	0.509232	0.314321	1.37211	11.2748	0.0203658	0.123817	2.72449	2.71809	0.00339331	0.0846327	0.933596	0.953432
Amn|ENSMUSG00000021278	0.843438	0.407311	18.7245	0.000155772	0.0530141	0.774237	0.407536	19.9694	0.000105187	0.00236774	0.611165	1.73418	-1.50462	-11.2395	9.92245e-09	3.70267e-07
Amotl2|ENSMUSG00000032531	-0.164756	3.92421	6.03504	0.0315479	0.580149	0.134311	3.92422	4.52237	0.062999	0.257192	15.6556	15.2806	0.0349732	0.839894	0.419011	0.532885
Ampd2|ENSMUSG00000027889	-0.109835	6.04322	7.12265	0.0226184	0.528379	-0.210899	6.04324	28.6214	8.84315e-06	0.000317743	75.7251	60.691	0.319287	16.4523	7.91974e-11	1.17456e-08
Amz1|ENSMUSG00000050022	-0.170776	5.10332	4.61148	0.0400061	0.62067	0.254379	5.10354	11.6834	0.00184453	0.0221537	33.2974	35.2551	-0.0824232	-1.72964	0.109691	0.185044
Anapc16|ENSMUSG00000020107	-0.113192	5.72475	10.2593	0.0266753	0.553339	-0.0515766	5.72468	2.52435	0.277158	0.592064	56.4897	50.536	0.160677	8.38168	7.31527e-07	1.07481e-05
Ankrd29|ENSMUSG00000057766	0.259181	4.11083	9.50744	0.00438031	0.270077	-0.00720774	4.11093	0.00848598	0.92722	0.976155	15.1905	18.1489	-0.256707	-4.5488	0.000521478	0.00231899
Ankrd34b|ENSMUSG00000045034	-0.218445	4.51749	12.1382	0.00154871	0.16185	0.0142883	4.51748	0.0614849	0.81772	0.935666	25.2014	21.9386	0.200035	5.55671	0.000111344	0.000644875
Ankrd35|ENSMUSG00000038354	-0.398482	3.67015	9.60742	0.00420397	0.26885	-0.374138	3.67021	9.64338	0.00414518	0.0402111	17.0679	10.1433	0.750766	10.6726	4.8988e-07	7.72928e-06
Ankrd45|ENSMUSG00000044835	0.110542	5.44277	10.5797	0.0387561	0.615196	0.14383	5.44272	20.7996	0.00381328	0.0378033	38.296	46.2729	-0.272975	-12.1207	1.73141e-09	1.06916e-07
Ankrd63|ENSMUSG00000078137	-0.118483	7.41128	4.61882	0.039859	0.620476	-0.118005	7.41123	5.07824	0.0317444	0.16648	188.176	158.684	0.245932	9.02073	6.87948e-08	1.60017e-06
Anks1b|ENSMUSG00000058589	-0.21175	8.91202	8.6449	0.00627999	0.30456	-0.212846	8.91204	10.2191	0.00328125	0.03399	565.573	420.652	0.427086	11.6942	7.30886e-08	1.68648e-06
Ano3|ENSMUSG00000074968	-0.170593	9.1948	6.33802	0.0174237	0.500628	-0.337267	9.19464	30.2566	5.78838e-06	0.000223405	724.449	506.782	0.515518	15.2551	8.3965e-09	3.29629e-07
Anxa11|ENSMUSG00000021866	0.198028	3.09994	7.85527	0.031086	0.579112	0.0423408	3.09988	0.422886	0.615953	0.841494	7.51345	8.84334	-0.235115	-6.49452	5.7645e-06	5.68327e-05
Aoah|ENSMUSG00000021322	-0.795256	-1.2125	5.1013	0.03138	0.57997	-0.929806	-1.21237	6.72709	0.0145797	0.0982755	0.831975	0.191045	2.12263	7.13883	6.05422e-06	5.90184e-05
Ap1s1|ENSMUSG00000004849	-0.157701	8.30209	13.1632	0.00105509	0.137573	-0.123249	8.30213	9.15355	0.00507475	0.04646	354.238	292.79	0.274851	17.2307	4.85251e-09	2.2033e-07
Apex2|ENSMUSG00000025269	0.205995	2.65741	5.6939	0.044746	0.642296	-0.177801	2.65743	5.00248	0.0614768	0.252797	5.97079	6.1431	-0.0410444	-1.0712	0.301231	0.413066
Appl2|ENSMUSG00000020263	-0.107372	6.77256	8.22513	0.0187888	0.508495	0.0268604	6.77263	0.588747	0.53445	0.795219	114.71	108.493	0.080381	3.83371	0.00133101	0.00495189
Aqp4|ENSMUSG00000024411	-0.263572	6.91315	27.4195	1.21375e-05	0.0148589	0.0948508	6.9132	3.85739	0.0589144	0.246493	132.022	118.138	0.160304	5.51374	0.000183709	0.00097235
Arel1|ENSMUSG00000042350	-0.136369	8.28419	10.016	0.00355899	0.24399	-0.00253707	8.28424	0.00397928	0.951903	0.985272	328.478	298.241	0.139317	5.45166	8.13149e-05	0.000493004
Arhgap42|ENSMUSG00000050730	0.170656	3.50517	5.25898	0.0408609	0.624723	0.306396	3.50534	19.1602	0.000135753	0.00290717	9.15973	12.7462	-0.476695	-12.5523	7.3315e-10	5.60424e-08
Arhgap6|ENSMUSG00000031355	0.126051	4.79852	4.70386	0.0439426	0.638081	0.330942	4.79866	36.4811	1.27996e-06	6.40913e-05	22.4514	30.9609	-0.463641	-16.8888	8.87315e-12	2.49595e-09
Arhgap9|ENSMUSG00000040345	0.515445	-0.388727	4.99108	0.0331249	0.589085	-0.192706	-0.388899	0.797324	0.379048	0.687889	0.550227	0.699718	-0.346748	-2.56495	0.0208889	0.0480722
Arhgef11|ENSMUSG00000041977	0.144651	6.16528	11.0163	0.00238846	0.200491	0.0596508	6.16538	2.10343	0.182512	0.477986	64.3766	74.4444	-0.209626	-6.68895	9.79706e-06	8.7583e-05
Arhgef25|ENSMUSG00000019467	0.172612	5.52083	11.8214	0.00174775	0.174156	0.0755022	5.5209	2.47428	0.12628	0.389802	41.1001	49.3631	-0.264289	-6.87598	2.0679e-05	0.000160321
Arhgef39|ENSMUSG00000051517	-0.281512	2.04273	4.42718	0.0439062	0.638081	-0.0649746	2.04281	0.271084	0.606452	0.837284	4.86048	3.78591	0.360457	3.53576	0.00539509	0.0157601
Arid5b|ENSMUSG00000019947	0.449752	4.09702	10.2397	0.00325179	0.230369	-0.120261	4.09702	0.793821	0.380084	0.688979	13.7094	17.9016	-0.384929	-3.77624	0.00226388	0.00763368
Arl11|ENSMUSG00000043157	0.913136	-0.616736	15.4654	0.000462715	0.0922147	-0.416873	-0.61677	4.26518	0.0563527	0.24058	0.46329	0.614421	-0.407311	-2.97617	0.00866766	0.0233253
Armcx4|ENSMUSG00000049804	0.152216	5.9989	11.1221	0.00229145	0.197601	0.209203	5.99894	23.2865	3.868e-05	0.00105743	54.3549	70.0282	-0.365525	-12.8573	2.55382e-09	1.42935e-07
Arpc5|ENSMUSG00000008475	0.126859	4.86242	8.00023	0.0389872	0.616509	0.172042	4.8624	17.066	0.00275581	0.0297119	25.1432	31.1655	-0.309781	-13.2831	2.05545e-09	1.20568e-07
Arpp19|ENSMUSG00000007656	-0.26604	9.33001	8.14808	0.00776616	0.336691	-0.0620165	9.33012	0.522632	0.475356	0.758679	735.741	586.247	0.32769	8.5862	9.72219e-07	1.33888e-05
Arpp21|ENSMUSG00000032503	-0.277678	10.9814	17.7463	0.000214081	0.0601497	-0.0788764	10.9815	1.62399	0.212384	0.51755	2340.65	1817.57	0.364899	11.3253	3.96219e-07	6.46109e-06
Arrdc2|ENSMUSG00000002910	0.340568	3.65453	5.63086	0.0242922	0.541723	0.0260786	3.65458	0.0351248	0.852604	0.949677	9.69725	13.1123	-0.435277	-3.50614	0.00333066	0.0105251
Asah2|ENSMUSG00000024887	0.163879	4.55725	4.73222	0.0376598	0.614628	0.0146481	4.55731	0.0427052	0.837687	0.943056	21.2559	24.2343	-0.18919	-4.13137	0.000712862	0.00298422
Asb5|ENSMUSG00000031519	0.606267	-0.899978	6.37994	0.0251851	0.548041	0.0420542	-0.900137	0.0377174	0.863818	0.953484	0.368174	0.545079	-0.56608	-4.1182	0.000764664	0.00315615
Asic1|ENSMUSG00000023017	-0.126397	6.77393	9.69846	0.00547805	0.291578	-0.0810678	6.77391	4.58943	0.0563665	0.24058	121.35	105.014	0.208597	7.77167	1.47827e-06	1.89306e-05
Asl|ENSMUSG00000025533	0.207365	3.64642	8.35321	0.0100952	0.390595	0.235157	3.64642	12.139	0.0016933	0.0207288	10.3064	14.0524	-0.447271	-11.4938	3.10319e-08	9.00445e-07
Ass1|ENSMUSG00000076441	-0.1632	3.53602	4.89408	0.047132	0.658887	0.158501	3.53613	5.15548	0.0408625	0.196476	11.8046	11.8151	-0.0012786	-0.0301745	0.976289	0.983305
Atcay|ENSMUSG00000034958	0.100438	7.47679	10.1376	0.0244318	0.543129	-0.0286978	7.47675	0.957616	0.492321	0.771237	172.461	181.232	-0.0715653	-4.10949	0.000952556	0.00376509
Atf4|ENSMUSG00000042406	-0.109687	6.30447	6.23731	0.020642	0.514967	0.0350023	6.30449	0.726607	0.430318	0.72779	82.76	78.5682	0.0749877	2.66966	0.01843	0.043386
Atf6|ENSMUSG00000026663	-0.171459	7.14499	10.5819	0.00283582	0.219924	0.00342033	7.14509	0.0048536	0.944923	0.982567	151.969	135.351	0.167073	5.58245	3.30735e-05	0.000235684
Atf7|ENSMUSG00000071584	0.345174	1.08376	6.08706	0.0283393	0.56264	0.0649592	1.0838	0.2551	0.654242	0.863093	1.76521	2.36124	-0.419704	-5.04507	0.000196545	0.00102631
Atg9b|ENSMUSG00000038295	0.317859	1.6989	5.27753	0.0287963	0.563902	-0.640947	1.69858	23.8423	3.29291e-05	0.000927142	3.4115	2.79647	0.286797	3.37346	0.00648897	0.0183711
Atl2|ENSMUSG00000059811	-0.10754	6.90632	8.70002	0.0183935	0.506829	0.0651863	6.90638	3.66512	0.126344	0.389931	123.413	119.901	0.0416543	1.79494	0.0931884	0.161733
Atp2b1|ENSMUSG00000019943	-0.219746	10.8021	14.6303	0.00062041	0.111017	0.0472756	10.8022	0.813193	0.374408	0.683668	1933.79	1713.58	0.174418	5.36475	8.832e-05	0.000529188
Atp2b2|ENSMUSG00000030302	-0.094622	9.59241	4.20422	0.049199	0.669366	-0.339459	9.59234	62.1776	8.84013e-09	1.13305e-06	917.831	679.068	0.434673	19.4003	1.49215e-10	1.88991e-08
Atp2b4|ENSMUSG00000026463	0.234893	6.38165	5.95085	0.0208737	0.517309	0.466081	6.3819	26.3891	1.61012e-05	0.000518891	60.7532	98.1006	-0.691302	-9.81611	9.21782e-08	2.01445e-06
Atp6ap1l|ENSMUSG00000078958	0.172676	4.4488	8.16052	0.0133309	0.452433	0.60897	4.44888	125.646	3.27199e-12	2.08135e-09	15.1338	26.1506	-0.789072	-28.9806	1.37172e-15	1.75854e-11
Atp6v0a4|ENSMUSG00000038600	0.417271	0.322451	6.23794	0.0313305	0.57997	-0.220774	0.322513	2.05931	0.215056	0.52081	1.07325	1.24464	-0.213732	-2.01412	0.0646183	0.120786
Atp6v0c|ENSMUSG00000024121	0.494872	6.41287	10.5213	0.00290508	0.22184	-0.307051	6.41296	4.94702	0.0338605	0.173878	76.2991	87.243	-0.193374	-1.42489	0.185278	0.281419
AW495222|ENSMUSG00000087334	0.353471	1.40532	7.45676	0.0150521	0.476854	0.246721	1.4053	4.15303	0.0677546	0.269684	1.98594	3.00593	-0.597991	-9.58647	3.44698e-08	9.67832e-07
AW551984|ENSMUSG00000038112	0.519609	0.844857	5.63173	0.0242821	0.541723	-0.0726274	0.844577	0.133591	0.717319	0.894522	1.26227	1.88618	-0.579448	-3.16472	0.00860249	0.0231786
B230354K17Rik|ENSMUSG00000097119	-0.240187	4.64376	27.68	0.000181347	0.0575575	-0.0413106	4.64374	0.900665	0.495854	0.773515	28.1242	23.0036	0.289953	11.5299	9.13344e-08	2.00145e-06
B3gnt2|ENSMUSG00000051650	-0.235579	7.19077	19.6125	0.000117429	0.046805	0.0997404	7.19095	4.13155	0.051084	0.227001	158.018	144.077	0.13325	5.0005	0.000145222	0.000803538
B3gnt7|ENSMUSG00000079445	-0.495055	-0.220853	4.68637	0.0385324	0.615196	1.07692	-0.220627	26.3886	1.6103e-05	0.000518891	0.661711	0.954863	-0.529092	-4.2297	0.000787801	0.00322632
B430218F22Rik|ENSMUSG00000097411	0.710479	-1.62933	4.52233	0.0418425	0.631654	-0.716254	-1.62949	6.03336	0.0200867	0.122728	0.254722	0.239747	0.0874105	0.363124	0.722521	0.795002
B430305J03Rik|ENSMUSG00000053706	0.315322	1.04061	4.17412	0.0499667	0.669569	-0.0133112	1.04043	0.00884963	0.926347	0.975894	1.80508	2.27399	-0.333165	-3.68526	0.00183656	0.00643147
Bag4|ENSMUSG00000037316	-0.126123	6.53069	9.37167	0.00625462	0.30456	-0.096661	6.53058	6.33055	0.0243023	0.139177	100.642	86.1949	0.223563	8.2912	2.84098e-06	3.22201e-05
Bag5|ENSMUSG00000049792	-0.109376	6.3248	6.09453	0.0205841	0.514272	0.030056	6.32477	0.549253	0.493903	0.771904	84.2381	79.685	0.0801654	2.92755	0.01484	0.0364013
Baiap2|ENSMUSG00000025372	-0.14045	9.03106	18.2793	0.00186385	0.181926	-0.00498572	9.03116	0.0246398	0.90729	0.968777	551.369	498.911	0.144235	8.34391	2.39197e-07	4.31002e-06
Baiap3|ENSMUSG00000047507	0.511545	3.94907	23.3182	3.82353e-05	0.0252044	0.150522	3.94935	2.43017	0.129577	0.395571	10.8959	17.3876	-0.674275	-9.41342	4.47494e-07	7.1632e-06
Basp1|ENSMUSG00000045763	0.107389	6.84635	9.4575	0.0182777	0.506829	0.241539	6.84643	52.0175	5.20132e-08	4.6771e-06	98.9925	125.255	-0.339478	-12.4039	4.85779e-09	2.2033e-07
Bbs2|ENSMUSG00000031755	-0.114331	5.35969	8.46401	0.0356872	0.606969	-0.23385	5.35958	40.7328	4.33386e-06	0.000178928	47.4907	37.3516	0.346475	18.0286	1.87159e-12	9.02107e-10
BC018242|ENSMUSG00000040563	0.109732	6.32153	5.61743	0.0244485	0.543129	0.032103	6.32152	0.520819	0.476117	0.759101	74.7545	82.4788	-0.141863	-4.63267	0.000424024	0.00196309
BC029722|ENSMUSG00000074649	0.131187	5.33905	9.27822	0.0168208	0.498773	-0.0552044	5.33894	1.95118	0.282216	0.597643	38.8149	41.1389	-0.0838929	-3.08822	0.00805109	0.0219991
Bcl11a|ENSMUSG00000000861	0.106951	5.99558	8.17189	0.0273674	0.559727	0.0286189	5.99549	0.659926	0.528095	0.792631	60.1432	66.2001	-0.138432	-7.03641	4.41453e-06	4.54874e-05
Bcl11b|ENSMUSG00000048251	-0.143238	8.68067	6.82025	0.0139698	0.457799	-0.0329	8.6807	0.405851	0.528947	0.792797	440.187	388.471	0.180311	5.4408	5.1025e-05	0.00033512
Bcl2a1b|ENSMUSG00000089929	-0.511756	-0.0772275	4.9137	0.0344139	0.597761	0.0609709	-0.077067	0.0788138	0.780851	0.920561	1.10154	0.820857	0.424323	3.73012	0.00170904	0.00605582
Bcr|ENSMUSG00000009681	-0.123774	8.90904	12.0041	0.00620789	0.30456	-0.188794	8.90911	30.8376	8.10411e-06	0.000294879	546.94	440.271	0.312991	21.9278	1.68983e-12	8.88546e-10
Begain|ENSMUSG00000040867	0.149971	6.41268	9.26488	0.00484222	0.283245	0.263427	6.41291	32.3728	3.40466e-06	0.000148038	70.4908	93.496	-0.40747	-11.4315	2.4123e-07	4.33375e-06
Birc3|ENSMUSG00000032000	0.301543	1.74622	6.94878	0.0266515	0.553339	0.48389	1.74629	21.8918	8.94358e-05	0.00208864	2.29346	3.95585	-0.786461	-13.4666	2.93189e-10	3.02822e-08
Bricd5|ENSMUSG00000045744	-1.4446	-0.991634	23.0858	4.09189e-05	0.0253304	0.283521	-0.991807	0.941188	0.33978	0.653277	0.687086	0.359673	0.933802	4.73513	0.000631649	0.00270426
Brinp3|ENSMUSG00000035131	0.284751	4.32741	9.98312	0.00360671	0.246277	0.224215	4.32746	7.32312	0.0111505	0.0815975	15.9359	22.5373	-0.500028	-9.02963	9.36023e-08	2.03023e-06
Brms1|ENSMUSG00000080268	-0.166401	4.58702	10.1203	0.011577	0.41834	-0.325216	4.58694	44.539	2.22905e-07	1.58689e-05	29.1669	20.9628	0.4765	16.8612	6.75462e-11	1.06956e-08
C030005K06Rik|ENSMUSG00000086600	0.490053	0.462211	4.95809	0.0336678	0.596725	-0.148861	0.462247	0.529697	0.472414	0.757097	1.07539	1.36551	-0.344576	-3.00742	0.00956545	0.0252787
C030006K11Rik|ENSMUSG00000079002	0.18365	3.20001	6.91509	0.0385659	0.615196	-0.105212	3.19982	2.6816	0.200984	0.504149	8.81907	9.36093	-0.0860253	-2.55418	0.0212678	0.0487849
C030034I22Rik|ENSMUSG00000073374	-0.265468	2.30755	6.48763	0.0197464	0.509232	-0.0828101	2.30745	0.734552	0.433637	0.731244	5.71511	4.60679	0.31102	4.40256	0.000700092	0.00294052
C2|ENSMUSG00000024371	-0.893706	-0.716367	12.2976	0.00145791	0.161207	0.589113	-0.716126	5.90198	0.0213666	0.127642	0.676106	0.541139	0.32125	2.74976	0.0142519	0.035186
C230038L03Rik|ENSMUSG00000085560	-0.530594	0.131391	8.05806	0.00963126	0.382993	0.100724	0.131292	0.332219	0.600518	0.834308	1.31666	0.994636	0.404638	3.71576	0.00211425	0.00719626
C230062I16Rik|ENSMUSG00000063623	0.63841	-1.21339	4.39835	0.0445536	0.641099	-0.453851	-1.21333	2.63416	0.115119	0.370604	0.302819	0.367486	-0.279232	-1.30123	0.211688	0.312026
C330006D17Rik|ENSMUSG00000049742	0.562577	-1.11939	6.18832	0.0420783	0.631654	-0.292147	-1.11923	2.00113	0.241585	0.554041	0.373181	0.43454	-0.219613	-2.17335	0.0447607	0.0898424
C4a|ENSMUSG00000015451	-1.29446	2.78679	29.9584	6.22768e-06	0.0106736	0.181739	2.78721	0.612192	0.440136	0.73553	11.9157	4.04459	1.55879	6.06173	6.93295e-05	0.000433828
C4b|ENSMUSG00000073418	-1.10742	5.81068	19.9532	0.000105517	0.0441088	-0.0471006	5.81088	0.0391956	0.844406	0.945759	92.0096	32.8008	1.48805	6.31006	5.02782e-05	0.000331424
C530008M17Rik|ENSMUSG00000036377	0.181885	3.95925	5.29211	0.0285932	0.56264	0.0723292	3.95934	0.969052	0.332841	0.645001	13.7377	16.3784	-0.253663	-5.32559	8.72555e-05	0.000524258
C920025E04Rik|ENSMUSG00000073405	-1.80161	-1.98161	18.9396	0.000145388	0.0522546	-0.120559	-1.98148	0.0721251	0.790118	0.925162	0.521159	0.0631781	3.04423	5.22202	0.000321841	0.00155213
Caap1|ENSMUSG00000028578	-0.184948	3.37247	7.50796	0.0283782	0.56264	0.158031	3.37243	6.20554	0.04608	0.212259	10.5744	10.4471	0.0174774	0.415586	0.684196	0.765737
Cacna1b|ENSMUSG00000004113	0.103215	6.81429	4.48703	0.0425953	0.633368	-0.0597075	6.8143	1.61445	0.213697	0.518835	108.494	112.186	-0.0482856	-1.58484	0.138099	0.222932
Cacna2d1|ENSMUSG00000040118	0.149043	5.94836	11.8618	0.00240978	0.200491	-0.208977	5.94812	26.5961	1.52146e-05	0.000497736	61.683	59.3997	0.0544161	1.90376	0.0756918	0.137099
Cacna2d3|ENSMUSG00000021991	-0.182765	8.38822	16.4982	0.000324665	0.0761584	0.0812034	8.38833	3.73907	0.0627013	0.256247	349.148	326.022	0.0988668	3.80565	0.00186313	0.00651533
Cacnb1|ENSMUSG00000020882	-0.12963	7.40961	9.75796	0.00395273	0.262527	-0.0884169	7.40968	4.96161	0.0342716	0.175183	188.278	161.114	0.224785	7.57893	8.10911e-07	1.16674e-05
Cacng2|ENSMUSG00000019146	-0.181722	6.28345	14.1561	0.000734913	0.121547	-0.0504716	6.28351	1.2406	0.274257	0.589379	87.3054	74.282	0.233058	9.37012	6.77873e-08	1.58279e-06
Cacng4|ENSMUSG00000020723	-0.104585	7.56657	4.26365	0.047722	0.660669	0.15514	7.56681	10.4926	0.00294073	0.0312243	186.115	193.839	-0.0586625	-2.51034	0.0233925	0.0526741
Calm2|ENSMUSG00000036438	-0.138546	10.7134	8.57716	0.00646312	0.307016	-0.095885	10.7133	4.98393	0.0332499	0.171708	1860.89	1579.64	0.2364	9.60984	7.92685e-07	1.14855e-05
Camk2b|ENSMUSG00000057897	-0.0918233	10.2612	4.4339	0.0472754	0.659238	-0.296761	10.2611	50.8975	6.41042e-08	5.67521e-06	1433.03	1090.43	0.39417	25.3445	6.30818e-15	2.73649e-11
Camk2n1|ENSMUSG00000046447	-0.147573	10.8758	5.91627	0.0212165	0.520241	-0.123104	10.8759	4.8882	0.0348589	0.177288	2106.57	1752.52	0.265466	7.5405	9.46442e-06	8.52239e-05
Camk4|ENSMUSG00000038128	-0.128101	9.78982	5.41113	0.0269935	0.556729	0.148501	9.78993	8.69104	0.00616197	0.0535587	878.274	894.046	-0.0256767	-0.845361	0.410237	0.524339
Camkk2|ENSMUSG00000029471	-0.141694	8.14958	5.09575	0.0314652	0.57997	-0.001295	8.14968	0.000503162	0.982253	0.995199	305.081	276.007	0.144486	4.48352	0.000491417	0.00221214
Camkv|ENSMUSG00000032936	-0.101692	9.6961	4.88264	0.0349468	0.599971	-0.122309	9.69614	7.77851	0.0091224	0.0708766	908.929	776.821	0.226585	11.3377	1.72924e-08	5.66146e-07
Caprin2|ENSMUSG00000030309	0.186659	3.10584	5.1888	0.0385016	0.615196	0.283983	3.10582	13.4234	0.000959855	0.0135238	6.99993	9.78345	-0.483003	-10.424	9.17179e-09	3.51322e-07
Capza1|ENSMUSG00000070372	0.223929	3.95569	5.87415	0.0216422	0.521742	0.0215078	3.95575	0.061804	0.805372	0.930651	13.4419	16.1116	-0.261368	-3.50811	0.00389528	0.0120034
Car12|ENSMUSG00000032373	-0.269721	4.41441	6.37786	0.0171056	0.500628	-0.172138	4.41437	2.98857	0.0942024	0.32818	26.0082	19.3327	0.427919	6.008	2.34505e-05	0.000177382
Car2|ENSMUSG00000027562	-0.159496	7.88265	5.44476	0.0265595	0.553339	0.0969949	7.88273	2.22661	0.146162	0.423541	240.015	230.57	0.057918	1.12541	0.277269	0.386727
Caskin1|ENSMUSG00000033597	0.110278	6.51789	8.451	0.0163356	0.498177	-0.201332	6.51794	31.8517	3.87306e-06	0.000163842	94.1291	88.6423	0.0866453	3.77896	0.00298328	0.00960763
Casp6|ENSMUSG00000027997	0.294881	1.26021	5.62851	0.0498479	0.66942	-0.134192	1.26038	1.37143	0.33173	0.64427	2.1083	2.39136	-0.181756	-2.51149	0.0238265	0.0535056
Casq1|ENSMUSG00000007122	0.564275	0.192471	10.5404	0.00504285	0.285245	-0.0276297	0.192109	0.0309029	0.880105	0.958942	0.847269	1.2541	-0.565755	-5.80807	2.96598e-05	0.000214385
Cbx4|ENSMUSG00000039989	0.110575	6.19596	5.67933	0.0237372	0.534826	-0.0349917	6.19582	0.656206	0.435532	0.732134	69.658	73.6723	-0.0808332	-3.82675	0.00141906	0.00522018
Ccdc108|ENSMUSG00000047021	0.603713	1.65685	11.5345	0.00195185	0.182802	0.505035	1.65646	10.5612	0.00286143	0.0306391	2.00114	4.28603	-1.09882	-9.5929	7.76684e-08	1.76508e-06
Ccdc149|ENSMUSG00000045790	-0.121373	5.63719	7.86485	0.0182531	0.506829	-0.0914161	5.63721	5.00954	0.0578597	0.244323	55.4205	47.8418	0.212146	7.73591	1.17286e-05	0.000101808
Ccdc155|ENSMUSG00000038292	-0.404764	0.944953	6.20848	0.0185031	0.508152	0.73693	0.945375	22.1437	5.41699e-05	0.00138861	1.69536	2.14529	-0.339578	-2.8897	0.0101968	0.0266229
Ccdc19|ENSMUSG00000026546	0.633157	0.419799	5.90751	0.0213043	0.521619	0.763143	0.419799	11.8483	0.00173139	0.0211348	0.694946	1.641	-1.23961	-11.0124	1.2027e-08	4.2765e-07
Ccdc39|ENSMUSG00000027676	0.166334	4.56596	8.90576	0.0122411	0.4308	0.187974	4.56596	13.0332	0.00246109	0.0272003	20.2794	26.014	-0.359272	-12.1347	9.97762e-10	7.00938e-08
Ccdc87|ENSMUSG00000067872	0.447941	0.381256	6.26327	0.0197162	0.509232	-0.155772	0.381085	0.940549	0.367828	0.678639	1.09112	1.26744	-0.216104	-1.6987	0.110618	0.186354
Ccm2|ENSMUSG00000000378	-0.227728	6.6577	18.1521	0.00018746	0.0584161	-0.0886724	6.65771	3.28332	0.0800746	0.298067	117.341	93.8027	0.32301	11.2908	3.72713e-09	1.81943e-07
Ccng2|ENSMUSG00000029385	-0.105839	6.3865	5.30473	0.0284188	0.56264	0.0388107	6.38649	0.828937	0.374816	0.68401	86.1903	82.3271	0.0661578	2.84497	0.0122157	0.0310483
Cd200|ENSMUSG00000022661	0.205562	6.07037	32.5884	2.25978e-05	0.0189514	0.201497	6.07023	37.0029	8.61468e-06	0.000310834	55.6718	74.4947	-0.420191	-15.0442	4.55552e-10	4.01256e-08
Cd320|ENSMUSG00000002308	-0.172718	3.4589	8.75485	0.0386828	0.615196	-0.0312548	3.45886	0.334193	0.688725	0.879439	11.9123	10.3462	0.203347	6.78383	3.44142e-06	3.73689e-05
Cd38|ENSMUSG00000029084	-0.282936	2.4656	5.00983	0.0328206	0.586562	-0.0200619	2.4656	0.0286442	0.866747	0.955051	6.28004	5.06937	0.308968	3.98026	0.000971085	0.00382352
Cd4|ENSMUSG00000023274	-0.138788	6.65617	4.76017	0.0371386	0.612374	-0.479192	6.65606	69.5072	2.77568e-09	4.58387e-07	127.818	83.364	0.616592	17.4011	3.49972e-09	1.76021e-07
Cdc25a|ENSMUSG00000032477	0.449342	1.94897	13.0646	0.00109425	0.1389	0.0245524	1.94879	0.0476073	0.831917	0.941684	2.95701	4.08758	-0.467107	-4.96978	0.000154603	0.000843079
Cdcp1|ENSMUSG00000035498	-0.775369	0.344628	8.62542	0.00633207	0.30456	-0.789847	0.344685	9.7866	0.00390946	0.0385226	2.29904	0.763959	1.58946	8.92122	1.18233e-05	0.000102375
Cdh10|ENSMUSG00000022321	0.212337	5.35032	14.9791	0.000548468	0.104447	0.210702	5.35028	17.6378	0.000222217	0.00425481	33.5836	45.255	-0.430321	-13.8822	4.10202e-10	3.76605e-08
Cdh18|ENSMUSG00000040420	0.24474	3.42815	8.30007	0.00727468	0.324689	0.463962	3.42815	33.7134	2.45632e-06	0.0001128	7.92075	12.9845	-0.71308	-12.5971	1.4105e-09	9.06481e-08
Cdh23|ENSMUSG00000012819	0.548234	0.224557	6.49927	0.0161749	0.495039	-0.588126	0.224606	8.246	0.00744947	0.0612762	0.999147	1.00548	-0.00911682	-0.0689152	0.946075	0.962099
Cdh24|ENSMUSG00000059674	-0.351855	0.893142	4.57956	0.0406532	0.623461	0.0993212	0.892969	0.416806	0.528287	0.792682	1.9997	1.77001	0.176027	1.39999	0.18713	0.283463
Cdh6|ENSMUSG00000039385	0.368088	2.4303	10.5278	0.00289763	0.22184	0.0326941	2.43021	0.0987987	0.755466	0.910311	4.37923	5.89428	-0.428639	-5.30504	0.000183708	0.00097235
Cdhr4|ENSMUSG00000032595	0.951163	0.0832118	5.64783	0.0240963	0.539851	-0.300818	0.0821833	0.855359	0.362469	0.674222	0.775193	1.37743	-0.829349	-2.89165	0.0111197	0.0286913
Cdk14|ENSMUSG00000028926	0.351494	5.81262	11.3479	0.00209823	0.192308	0.201375	5.81251	4.22036	0.0488022	0.22011	46.5832	66.1622	-0.506199	-10.2727	1.65793e-08	5.47971e-07
Cdk19|ENSMUSG00000038481	-0.160666	7.45889	17.6868	0.000350469	0.0785836	0.106737	7.45897	9.06301	0.011441	0.0830862	181.265	174.722	0.0530414	2.58923	0.0194192	0.0453332
Cdk2ap1|ENSMUSG00000029394	-0.23273	3.47176	8.74338	0.00602369	0.30456	0.208262	3.47206	8.0056	0.00826386	0.0659534	11.158	11.0161	0.0184544	0.637633	0.538458	0.644479
Cdk6|ENSMUSG00000040274	0.476712	-0.459955	4.46051	0.0431708	0.634022	-0.209073	-0.460051	1.00456	0.336292	0.649405	0.584955	0.720735	-0.301142	-2.12378	0.0550882	0.106245
Cecr6|ENSMUSG00000094626	-0.1321	6.09007	4.31382	0.0465136	0.65589	-0.0513695	6.09014	0.730728	0.399467	0.70382	74.0473	65.1438	0.184821	5.67338	2.76481e-05	0.000202769
Celf1|ENSMUSG00000005506	-0.089332	8.71874	6.65389	0.0480801	0.662911	-0.0607647	8.71881	3.38284	0.150749	0.42897	454.434	409.167	0.151381	7.38435	2.96048e-06	3.31849e-05
Cenpb|ENSMUSG00000068267	0.0964141	7.10522	7.12489	0.0324889	0.583708	-0.130999	7.10517	15.5376	0.00188617	0.0225591	138.644	135.536	0.032711	1.49035	0.16274	0.254197
Cenpe|ENSMUSG00000045328	0.410399	1.2181	8.45737	0.00680126	0.315899	-0.118922	1.21773	0.851503	0.390765	0.698679	1.84353	2.319	-0.33103	-3.75059	0.00235378	0.00788876
Cep110|ENSMUSG00000057110	0.225463	4.08123	8.9013	0.00563604	0.296364	0.0915238	4.08126	1.66597	0.206722	0.511004	14.5426	18.1822	-0.322247	-7.75241	6.70014e-07	1.00052e-05
Cgref1|ENSMUSG00000029161	-0.142556	4.80938	7.81763	0.0237472	0.534826	0.466569	4.80965	96.605	7.3184e-11	2.51387e-08	24.561	30.5832	-0.316368	-12.0513	5.01095e-08	1.25288e-06
Chchd5|ENSMUSG00000037938	-0.232728	2.29394	7.13555	0.0405176	0.623461	0.180698	2.29396	5.00385	0.0867987	0.312989	5.09651	4.90132	0.05634	1.426	0.173425	0.2673
Chd3|ENSMUSG00000018474	0.162462	9.39668	8.62804	0.00632504	0.30456	0.35035	9.39693	43.7291	2.63312e-07	1.79459e-05	529.101	754.037	-0.511093	-15.3562	3.01686e-10	3.04724e-08
Chd6|ENSMUSG00000057133	0.0910843	6.93741	5.52287	0.0430857	0.633664	-0.0126181	6.93739	0.118598	0.765868	0.913706	117.397	124.459	-0.0842688	-4.19754	0.00102662	0.00400134
Chn1|ENSMUSG00000056486	-0.160488	10.0566	8.18195	0.00765361	0.334504	-0.171981	10.0566	11.1531	0.00226575	0.025771	1221.05	968.257	0.334654	13.1495	1.33878e-07	2.6877e-06
Chst2|ENSMUSG00000033350	0.0930616	7.08216	5.41511	0.0391022	0.616534	0.00767569	7.08224	0.0422675	0.856331	0.951566	127.928	137.463	-0.103708	-4.50521	0.000333131	0.0016008
Cited2|ENSMUSG00000039910	0.141203	4.76355	5.63847	0.0253171	0.548041	-0.0477985	4.76338	0.774413	0.414999	0.715059	25.9228	27.7127	-0.0963276	-2.9849	0.00858691	0.0231475
Ckmt1|ENSMUSG00000000308	-0.136223	7.15404	18.58	0.00231891	0.197714	-0.084699	7.15402	8.14008	0.0425212	0.201845	156.104	134.019	0.220076	12.1369	8.95649e-10	6.48329e-08
Clcf1|ENSMUSG00000040663	0.70683	0.472853	6.46692	0.0164174	0.498337	1.72919	0.47344	55.0712	2.98502e-08	3.08842e-06	0.439867	2.16667	-2.30034	-14.0126	2.56183e-09	1.42935e-07
Clcn7|ENSMUSG00000036636	0.115836	5.61838	9.62063	0.0254151	0.548041	0.0269826	5.61839	0.593955	0.578472	0.823684	45.7566	50.5795	-0.144572	-7.1016	3.20407e-06	3.53671e-05
Cldn26|ENSMUSG00000022715	-1.0331	-0.0497091	12.2014	0.00151204	0.16185	0.704898	-0.0492355	6.3192	0.0175823	0.111926	1.04085	0.888877	0.22771	2.0309	0.0589854	0.112178
Clip4|ENSMUSG00000024059	-0.0973453	7.00971	8.05521	0.031196	0.57997	-0.0362939	7.00963	1.29758	0.39111	0.698778	135.938	124.101	0.13144	5.69939	4.50827e-05	0.00030309
Clspn|ENSMUSG00000042489	-0.492585	5.09684	12.6166	0.00129294	0.154963	0.255447	5.09724	3.86888	0.0585604	0.245678	37.0691	33.1003	0.163376	2.4474	0.0256654	0.0567754
Clstn2|ENSMUSG00000032452	0.161282	5.7432	11.5578	0.00193435	0.182802	0.0206389	5.74327	0.227737	0.664522	0.868335	49.3904	56.2128	-0.186669	-7.70632	4.01418e-06	4.2138e-05
Clybl|ENSMUSG00000025545	0.186382	3.67773	10.1351	0.0201995	0.509232	-0.0529218	3.67771	0.972809	0.474734	0.758258	11.9822	13.1548	-0.134699	-4.64367	0.000242047	0.00122199
Cmip|ENSMUSG00000034390	0.105165	7.27075	8.51336	0.0183955	0.506829	6.03653e-05	7.27076	3.15111e-06	0.99885	0.999499	145.052	156.25	-0.107292	-4.06359	0.00152402	0.00552525
Cnbp|ENSMUSG00000030057	-0.0923005	8.28686	6.36499	0.0395278	0.618556	-0.0550941	8.28678	2.64887	0.189059	0.487531	334.898	302.623	0.146201	9.11494	5.25056e-07	8.19314e-06
Cnga2|ENSMUSG00000005864	0.751639	-1.6947	4.99055	0.0331337	0.589085	0.0385641	-1.69477	0.0173059	0.896223	0.965055	0.158968	0.304005	-0.935362	-4.19148	0.000630426	0.00270036
Cnr1|ENSMUSG00000044288	-0.417295	9.03499	9.08718	0.00521396	0.287551	-0.084792	9.03506	0.45656	0.504446	0.778773	664.977	470.734	0.498393	5.91629	0.000150916	0.000827915
Cnrip1|ENSMUSG00000044629	0.167545	4.71676	11.4182	0.00836362	0.350702	0.0209996	4.71669	0.201718	0.722882	0.896821	23.7249	27.2328	-0.198944	-6.31542	8.53914e-06	7.85221e-05
Cntn3|ENSMUSG00000030075	0.205972	4.18611	7.97501	0.00837005	0.350702	-0.0999399	4.18596	2.19898	0.1486	0.426363	16.6375	18.0159	-0.114834	-2.15515	0.0534058	0.103704
Cntn5|ENSMUSG00000039488	-0.289414	4.18478	12.1699	0.00153017	0.16185	0.18767	4.18483	5.67071	0.023842	0.137181	19.3311	17.9282	0.108691	1.60892	0.130529	0.21323
Cntn6|ENSMUSG00000030092	0.247036	4.57482	13.7369	0.000855134	0.128537	0.0778058	4.57477	1.51032	0.228705	0.537745	20.3344	25.7524	-0.340784	-11.2857	1.27625e-08	4.4829e-07
Cntnap1|ENSMUSG00000017167	-0.0972682	8.3407	4.71366	0.0380104	0.614628	-0.332876	8.34068	62.248	8.73847e-09	1.12845e-06	386.955	287.765	0.427278	17.1587	2.69311e-09	1.48001e-07
Cntnap2|ENSMUSG00000039419	0.117528	6.69307	4.79845	0.0364375	0.611985	-0.374296	6.69288	55.5779	2.72765e-08	2.90978e-06	112.244	94.0281	0.255476	7.71562	3.36881e-06	3.66952e-05
Cntnap3|ENSMUSG00000033063	-0.271998	5.52969	6.8879	0.0135482	0.452637	0.149935	5.52995	2.39721	0.132106	0.400329	46.6999	42.9359	0.121235	1.8434	0.0835704	0.148228
Coch|ENSMUSG00000020953	-0.297486	7.44623	6.25756	0.0180858	0.505157	0.357387	7.44662	10.6053	0.00281173	0.0302011	170.113	182.905	-0.104601	-1.78325	0.0927842	0.161267
Col11a1|ENSMUSG00000027966	0.295321	3.0988	5.58279	0.0248568	0.544738	0.746541	3.09899	40.3475	5.39137e-07	3.193e-05	5.32095	10.8915	-1.03345	-16.5986	3.22143e-10	3.17604e-08
Col6a4|ENSMUSG00000032572	0.740423	3.48875	4.22104	0.0487761	0.668779	-1.04289	3.48909	9.03764	0.00532622	0.0481716	11.0411	9.2659	0.252886	1.06458	0.303999	0.415976
Col6a6|ENSMUSG00000043719	-0.818767	-1.62431	4.90494	0.0345634	0.597761	0.977452	-1.62459	8.67227	0.00621112	0.0537174	0.332903	0.339028	-0.0263038	-0.120037	0.90594	0.934402
Coro2a|ENSMUSG00000028337	-0.209945	3.81409	9.28987	0.00703815	0.319965	0.152321	3.81433	5.53268	0.0379428	0.186825	14.2069	13.6849	0.0540022	1.19443	0.249073	0.355187
Coro2b|ENSMUSG00000041729	-0.10569	8.09718	5.17415	0.0302821	0.575172	0.167699	8.09739	14.4091	0.000672059	0.0101161	264.366	276.564	-0.0650761	-3.21866	0.00658594	0.0186032
Coro7|ENSMUSG00000039637	0.0948166	6.86523	6.34218	0.0364212	0.611985	-0.0816393	6.8652	5.27269	0.0543231	0.23525	116.232	117.354	-0.0138584	-0.505165	0.622705	0.714628
Cox6a2|ENSMUSG00000030785	0.31355	2.10971	5.2462	0.029238	0.568269	-0.203585	2.1099	2.5457	0.121145	0.381635	3.90614	4.31273	-0.142855	-1.61328	0.13034	0.213032
Cox7c|ENSMUSG00000017778	-0.169687	3.78418	6.89777	0.0318347	0.582505	0.115193	3.78418	3.69494	0.116311	0.372705	14.3772	13.8721	0.0515872	1.67683	0.113482	0.190356
Cpne9|ENSMUSG00000030270	-0.548455	4.19147	4.43432	0.0437475	0.638081	1.03336	4.19232	17.3772	0.000242205	0.00456126	13.8274	20.2021	-0.546972	-4.83674	0.000175445	0.000936717
Crabp1|ENSMUSG00000032291	-0.245299	3.23931	10.2291	0.00592992	0.30429	0.609216	3.23965	71.039	2.20303e-09	3.90073e-07	7.97192	10.3928	-0.382592	-6.72674	1.3646e-05	0.000114611
Cramp1l|ENSMUSG00000038002	0.133647	5.22753	6.60024	0.0175949	0.502597	-0.00586357	5.22765	0.0145797	0.911711	0.970618	34.9889	38.4592	-0.136432	-4.1382	0.000800956	0.00327016
Crebbp|ENSMUSG00000022521	0.196433	5.79923	10.2703	0.00321206	0.230369	-0.165639	5.79921	8.30632	0.00725904	0.0603394	53.9262	55.2676	-0.035449	-1.16577	0.265657	0.373768
Crebrf|ENSMUSG00000048249	-0.112234	6.63662	12.4173	0.014315	0.461174	-0.146772	6.63651	25.9088	0.000606522	0.00942716	110.904	92.5294	0.261323	17.807	6.28432e-10	5.04841e-08
Crip2|ENSMUSG00000006356	-0.113594	6.69828	5.60721	0.0245682	0.543323	-0.148967	6.69836	11.0244	0.00238287	0.0267139	114.693	95.471	0.264639	14.4724	1.58758e-10	1.98185e-08
Cse1l|ENSMUSG00000002718	0.102635	5.86044	8.00555	0.0396104	0.618556	0.0112907	5.86028	0.114196	0.8079	0.932101	54.4278	59.1459	-0.119934	-5.75345	2.51389e-05	0.000187537
Ctnna1|ENSMUSG00000037815	-0.121346	6.87759	8.3936	0.00760984	0.334423	-0.0609993	6.87756	2.48427	0.150758	0.42897	128.278	113.073	0.182021	7.89984	1.02381e-05	9.09631e-05
Ctxn3|ENSMUSG00000069372	0.760341	-1.06232	5.03526	0.032413	0.583708	-0.0146163	-1.06238	0.00233018	0.961822	0.989139	0.298204	0.499493	-0.744164	-3.29591	0.00428225	0.0129905
Cutc|ENSMUSG00000025193	-0.269748	2.25604	7.33916	0.0177131	0.503636	-0.125138	2.25585	1.85422	0.236007	0.547021	5.66929	4.4186	0.35958	5.81728	5.5216e-05	0.000358842
Cxx1a|ENSMUSG00000067925	0.128862	6.02709	9.43919	0.00799325	0.34121	0.00499987	6.02708	0.0161906	0.912705	0.971155	61.6505	67.51	-0.130987	-5.0964	0.000124576	0.000708502
Cxx1b|ENSMUSG00000067924	0.12078	6.28029	12.0999	0.0108186	0.401865	-0.0034287	6.28025	0.0113002	0.938284	0.98059	74.1939	80.3165	-0.114396	-5.63189	0.000119205	0.000682204
Cxx1c|ENSMUSG00000051851	0.152082	6.96855	12.2533	0.00148256	0.161845	-0.0985341	6.96842	6.03424	0.0200784	0.122728	121.233	125.69	-0.0520812	-1.81009	0.0896887	0.156978
Cyld|ENSMUSG00000036712	-0.110557	9.0848	5.09407	0.0314912	0.57997	-0.279202	9.08465	38.2163	8.6285e-07	4.63108e-05	641.746	485.714	0.401894	14.4362	1.30784e-08	4.55693e-07
Cyp11a1|ENSMUSG00000032323	-0.463165	0.166601	5.50129	0.0258472	0.550333	-0.195682	0.166389	1.0445	0.315001	0.628791	1.41529	0.950339	0.574587	3.66089	0.00473097	0.0141173
Cyp46a1|ENSMUSG00000021259	-0.104302	7.89391	8.5152	0.0198593	0.509232	-0.0483566	7.89396	2.08375	0.246935	0.559661	254.655	229.159	0.152196	8.50438	8.11383e-06	7.51688e-05
Cyp4f14|ENSMUSG00000024292	0.474198	3.31257	19.7566	0.000112223	0.0457948	-0.145118	3.31257	2.20155	0.148372	0.426206	8.83777	10.4012	-0.23499	-3.63791	0.00271489	0.00887172
Cyp4f15|ENSMUSG00000073424	0.254122	3.96796	14.8366	0.000944771	0.132725	-0.00734099	3.96791	0.0145174	0.916807	0.972802	14.4459	16.4433	-0.18684	-5.39974	0.000101178	0.000594526
Cyp4x1|ENSMUSG00000047155	0.291476	3.15781	12.3961	0.00140468	0.158521	-0.0477256	3.15766	0.382027	0.564429	0.813398	7.56553	9.12645	-0.270613	-5.00877	0.000162717	0.000882055
Cyp7b1|ENSMUSG00000039519	0.160809	4.01923	7.6735	0.0312379	0.57997	0.0888012	4.01923	2.67547	0.202875	0.506391	14.3464	17.1156	-0.254622	-7.07865	6.37789e-06	6.16198e-05
D030046N08Rik|ENSMUSG00000089760	0.696102	-1.31261	4.25091	0.0480346	0.662854	-0.143754	-1.31263	0.209257	0.650668	0.860808	0.264719	0.408572	-0.626129	-3.13092	0.00618084	0.0176742
D330041H03Rik|ENSMUSG00000073437	-0.987782	2.55884	11.5964	0.0019057	0.182802	0.154997	2.55846	0.298429	0.588935	0.828887	7.50124	4.87422	0.621956	3.15403	0.00881086	0.0236263
D430019H16Rik|ENSMUSG00000094910	0.096505	8.1917	5.5975	0.0300876	0.575172	-0.0406616	8.19164	1.00844	0.329935	0.64284	282.603	295.385	-0.0638218	-2.42121	0.031809	0.0678237
D930048G16Rik|ENSMUSG00000097732	0.548618	1.34346	23.227	0.000230151	0.0634519	-0.344171	1.34334	11.3798	0.0102547	0.0771779	2.34115	2.65994	-0.184178	-2.8138	0.0134278	0.0335348
Dapp1|ENSMUSG00000028159	0.272349	3.48957	6.37862	0.0170996	0.500628	-0.30191	3.48959	8.95654	0.00551015	0.0494445	10.8995	10.9055	-0.000791531	-0.0119511	0.990609	0.993381
Dbi|ENSMUSG00000026385	-0.10774	6.60471	11.6572	0.0188562	0.508495	0.152219	6.60477	25.667	0.00042665	0.00715597	95.6323	98.734	-0.0460485	-3.10168	0.00648373	0.0183623
Dbpht2|ENSMUSG00000029878	-0.232919	6.30486	8.99393	0.00542124	0.290784	0.190822	6.30506	6.83284	0.0138958	0.0948949	81.0586	79.1076	0.0351492	0.762271	0.457329	0.570658
Dcx|ENSMUSG00000031285	0.269039	4.975	17.8771	0.000205079	0.0597235	-0.0582856	4.97472	0.97696	0.330907	0.643496	27.4993	32.0525	-0.221041	-6.07739	1.34589e-05	0.000113478
Ddit3|ENSMUSG00000025408	-0.137372	4.47287	6.62906	0.0428675	0.633368	0.205387	4.47297	16.9629	0.00120867	0.0161548	22.1026	23.1052	-0.064002	-1.98078	0.0667299	0.124051
Ddit4l|ENSMUSG00000046818	-0.645056	3.35752	14.5373	0.000641267	0.111017	0.349159	3.35815	4.89347	0.0347683	0.176932	10.5221	9.3655	0.167992	2.27063	0.0370537	0.0770561
Ddn|ENSMUSG00000059213	-0.167602	10.2936	12.1812	0.00152363	0.16185	-0.0163491	10.2938	0.130205	0.720764	0.895994	1341.83	1191.52	0.171398	6.76803	3.51057e-06	3.80068e-05
Ddx11|ENSMUSG00000035842	-0.324898	2.33601	10.3929	0.00378604	0.255468	0.130991	2.33619	1.95542	0.209341	0.513575	5.666	5.01428	0.17629	3.10709	0.00644352	0.0182902
Dek|ENSMUSG00000021377	-0.174693	6.75	9.25595	0.00486022	0.283331	0.0728945	6.74998	1.88304	0.180229	0.474833	112.658	104.809	0.104187	3.32029	0.006114	0.0175182
Dennd1c|ENSMUSG00000002668	-0.572221	0.559682	11.3142	0.00214162	0.194967	0.271392	0.559757	2.85846	0.121334	0.381879	1.66005	1.38248	0.263967	3.03084	0.00812354	0.02216
Depdc1b|ENSMUSG00000021697	-0.666352	-0.845852	6.42923	0.0167049	0.498773	0.286597	-0.845977	1.31218	0.261115	0.575029	0.581891	0.444976	0.38702	2.81638	0.0131366	0.0329546
Diap1|ENSMUSG00000024456	0.105128	6.33677	7.42551	0.0246687	0.54414	0.00191412	6.33678	0.00270999	0.965319	0.990522	76.4618	82.4784	-0.109276	-3.92781	0.0018173	0.00637305
Dleu7|ENSMUSG00000048281	0.248974	2.21076	5.06136	0.0387661	0.615196	0.919836	2.21082	84.5867	3.29273e-10	8.31655e-08	2.78223	6.113	-1.13564	-14.5934	6.84191e-11	1.06956e-08
Dlg1|ENSMUSG00000022770	0.100893	7.59852	9.75136	0.024646	0.54414	0.028995	7.59853	0.943863	0.491299	0.770382	181.781	199.999	-0.137786	-6.73998	3.95921e-06	4.16813e-05
Dlg5|ENSMUSG00000021782	0.129108	4.94091	4.17759	0.0498774	0.66942	0.191375	4.94102	10.8094	0.00259331	0.0283514	26.5902	33.2499	-0.322455	-12.1721	1.02824e-09	7.16337e-08
Dmd|ENSMUSG00000045103	0.110688	5.47447	4.4897	0.0425378	0.633368	0.021031	5.47441	0.185992	0.672799	0.872034	41.5784	45.9935	-0.145596	-5.61511	3.75429e-05	0.000260996
Dmkn|ENSMUSG00000060962	-0.420635	4.74204	26.3168	1.63784e-05	0.015595	0.812187	4.74247	107.662	2.07397e-11	9.4034e-09	22.0288	29.7928	-0.435572	-9.50917	3.69297e-08	1.01263e-06
Dnah2|ENSMUSG00000005237	0.261405	2.3237	5.09821	0.0314274	0.57997	0.0301823	2.32373	0.0790956	0.78047	0.920454	4.22918	5.16899	-0.289503	-3.09659	0.00914943	0.0243947
Dnah5|ENSMUSG00000022262	0.46975	1.12072	4.76648	0.037022	0.612374	-0.243914	1.12011	1.64662	0.209308	0.513575	1.82731	2.39342	-0.389358	-2.00433	0.0612437	0.115712
Dnah6|ENSMUSG00000052861	0.626362	1.44523	10.5975	0.00281829	0.219557	0.121159	1.4446	0.526748	0.473638	0.757663	1.81984	3.60957	-0.988016	-4.48965	0.000359703	0.0017109
Dnaja1|ENSMUSG00000028410	-0.0921836	7.07728	5.15695	0.0409832	0.624959	0.0423894	7.07725	1.25469	0.312849	0.626558	139.659	134.385	0.055531	2.96976	0.0101147	0.0264601
Dnajc7|ENSMUSG00000014195	-0.115058	7.71092	15.0062	0.0100685	0.390595	-0.0220337	7.71091	0.654525	0.598589	0.833165	225.222	204.747	0.137503	10.0517	8.02753e-08	1.80901e-06
Dnpep|ENSMUSG00000026209	-0.107299	5.43317	6.62613	0.0467417	0.65612	0.00309616	5.43315	0.00638876	0.950696	0.984873	45.7008	42.4902	0.10509	4.08004	0.000781325	0.00320813
Dnph1|ENSMUSG00000040658	0.305998	1.28592	5.5608	0.0428571	0.633368	-0.109725	1.28574	0.865319	0.421961	0.721727	2.15032	2.43825	-0.181291	-2.44598	0.0278269	0.060676
Dock4|ENSMUSG00000035954	-0.18159	7.85013	16.7434	0.00029887	0.0731761	-0.117396	7.8501	7.98171	0.00834994	0.0664551	264.295	214.617	0.300382	11.1627	2.22293e-07	4.07742e-06
Dok4|ENSMUSG00000040631	-0.238614	4.75325	11.3747	0.00207651	0.192308	-0.14858	4.75329	5.106	0.0313157	0.164896	31.7305	24.32	0.383728	8.63034	3.47275e-07	5.81652e-06
Dpp10|ENSMUSG00000036815	0.288308	6.35426	11.2523	0.00217783	0.194967	0.0522833	6.35408	0.411569	0.526078	0.791621	67.3361	85.2053	-0.339563	-6.10379	1.33834e-05	0.000113119
Drc1|ENSMUSG00000073102	-0.134682	4.76527	5.51838	0.03232	0.583701	0.0882568	4.76531	2.70317	0.133926	0.403044	28.0159	27.1529	0.0451348	2.19533	0.0430735	0.0871313
Drd1a|ENSMUSG00000021478	-0.215656	8.64297	19.2204	0.000132941	0.0504851	0.0640626	8.64307	1.946	0.173329	0.463912	428.425	384.577	0.15577	6.05516	4.68832e-05	0.000312891
Drd2|ENSMUSG00000032259	-0.226002	7.65634	17.8182	0.000209079	0.0597235	-0.0349087	7.65646	0.487881	0.490289	0.76945	226.679	188.811	0.263713	11.4829	1.85051e-08	5.96841e-07
Drp2|ENSMUSG00000000223	0.102289	5.88712	4.82069	0.0385969	0.615196	0.0287585	5.88716	0.4325	0.536602	0.796199	55.5291	60.9643	-0.13472	-4.54508	0.000591817	0.00257826
Dsg1c|ENSMUSG00000034774	0.548003	3.14267	16.0234	0.000381668	0.0808504	0.661848	3.1428	27.7993	1.0995e-05	0.000382265	4.34693	11.3959	-1.39045	-18.3783	1.48727e-12	8.53089e-10
Dsg2|ENSMUSG00000044393	0.941597	1.67056	35.9235	1.45039e-06	0.00497163	0.447534	1.67037	10.1694	0.00334759	0.034428	1.43344	3.99983	-1.48046	-22.5035	8.22993e-14	1.49118e-10
Dtwd1|ENSMUSG00000023330	-0.278273	3.02677	13.4009	0.00296383	0.222794	0.212552	3.02665	9.23528	0.014519	0.098059	8.58443	8.28989	0.0503687	1.06599	0.304458	0.416375
Dusp1|ENSMUSG00000024190	-0.31732	4.47879	4.49752	0.0423701	0.632562	0.0803941	4.47889	0.333718	0.567817	0.816279	25.4406	21.3507	0.252853	2.33992	0.0453819	0.0908685
Dusp12|ENSMUSG00000026659	-0.153309	4.23828	8.05946	0.0305456	0.575172	-0.0398131	4.23833	0.620971	0.549712	0.803756	20.6825	18.1327	0.189823	5.55748	0.000197154	0.00102857
Dusp14|ENSMUSG00000018648	-0.271111	6.29921	5.88066	0.0215758	0.521742	-0.000935654	6.29958	7.88863e-05	0.992973	0.997739	92.117	75.6596	0.283944	2.94988	0.0117569	0.0300671
Dusp18|ENSMUSG00000047205	-0.216857	3.97511	9.10034	0.00518539	0.287551	-0.261195	3.97504	15.37	0.000478961	0.00781953	18.827	13.4372	0.48657	10.3561	1.12606e-07	2.34849e-06
Dvl3|ENSMUSG00000003233	0.175902	4.30709	7.19227	0.0121089	0.42821	-0.0623716	4.30713	1.04016	0.346441	0.659585	18.48	20.0299	-0.11619	-3.35055	0.00699659	0.0195467
DXBay18|ENSMUSG00000071745	-0.907757	-1.71579	6.08393	0.0196102	0.509232	1.39214	-1.71566	16.5097	0.000323883	0.00574659	0.250108	0.326441	-0.384274	-2.00378	0.068312	0.126356
Dynll1|ENSMUSG00000009013	-0.135373	7.3749	7.27774	0.011373	0.41297	0.0864471	7.37497	3.39861	0.0752158	0.287222	170.743	164.967	0.0496543	1.87498	0.085071	0.150459
E2f2|ENSMUSG00000018983	0.663863	-0.802912	6.08488	0.0196015	0.509232	-0.264443	-0.803188	1.20168	0.281765	0.597152	0.406479	0.533615	-0.392619	-2.36782	0.0311929	0.0667233
E530001K10Rik|ENSMUSG00000075020	0.335642	2.48176	7.19251	0.0118139	0.423595	0.706467	2.48196	38.9472	7.33072e-07	4.08783e-05	3.37394	7.04205	-1.06156	-13.8503	1.94355e-09	1.17099e-07
Ebag9|ENSMUSG00000022339	-0.171241	4.81825	8.91756	0.00597877	0.30456	-0.0913797	4.81819	2.99573	0.113852	0.368528	31.3557	26.0947	0.26497	8.95947	8.12828e-07	1.16853e-05
Ebf1|ENSMUSG00000078561	-0.922949	-1.6126	5.65774	0.0239827	0.539421	0.106566	-1.61276	0.0871796	0.769841	0.915267	0.427021	0.260152	0.714954	3.54303	0.00409087	0.0125149
Ece2|ENSMUSG00000022842	0.204813	5.02436	15.3558	0.000499809	0.0962497	-0.0834875	5.02422	3.00277	0.129664	0.395626	30.6435	33.4731	-0.127423	-4.23567	0.000633048	0.00270691
Ednrb|ENSMUSG00000022122	-0.168931	6.11987	11.2114	0.00221284	0.194967	0.0597964	6.11993	1.67106	0.206048	0.509921	72.3985	67.4357	0.102447	3.22374	0.00608667	0.0174543
Efcab4a|ENSMUSG00000048200	-0.40163	0.49188	7.8091	0.0320251	0.583701	-0.0189536	0.492042	0.0190853	0.915489	0.972328	1.67652	1.30094	0.365912	4.81486	0.000168288	0.000904064
Efnb3|ENSMUSG00000003934	-0.0994664	7.75749	6.78101	0.0266166	0.553339	0.121769	7.75755	11.2356	0.00409313	0.0398523	212.737	216.609	-0.0260217	-1.08826	0.296354	0.407928
Egfl8|ENSMUSG00000015467	-0.455515	0.915657	13.1901	0.00635897	0.30456	0.184385	0.915912	2.38523	0.242332	0.555014	2.16857	1.79371	0.273801	5.4612	0.000101309	0.000594987
Egr1|ENSMUSG00000038418	-0.230153	8.62122	6.98199	0.0129846	0.445087	-0.089211	8.6216	1.16387	0.289318	0.603971	449.461	371.323	0.275522	6.42827	7.02236e-06	6.64406e-05
Egr2|ENSMUSG00000037868	-0.538421	4.36508	4.76366	0.037074	0.612374	0.284035	4.36566	1.47937	0.233419	0.544058	23.4024	20.085	0.220542	1.19154	0.264299	0.372249
Ehd4|ENSMUSG00000027293	0.183441	3.5074	5.41418	0.026954	0.556729	-0.0916238	3.50738	1.57512	0.229068	0.5382	10.7124	11.3892	-0.0883912	-2.02785	0.0646421	0.120805
Eif4e|ENSMUSG00000028156	-0.111527	6.43943	12.7353	0.0166769	0.498773	0.0249128	6.43934	0.770414	0.565419	0.814209	90.0828	84.94	0.0848082	6.58532	4.83114e-06	4.91095e-05
Eif5a2|ENSMUSG00000050192	-0.0949808	6.23226	5.68872	0.0456918	0.650099	-0.0435837	6.23223	1.40991	0.327443	0.640673	79.6489	72.4941	0.135791	7.74217	5.23835e-06	5.25106e-05
Elmod1|ENSMUSG00000041986	-0.144598	9.19269	11.2655	0.00216663	0.194967	-0.0886176	9.19265	4.95203	0.0371501	0.184036	648.364	549.729	0.238084	13.9395	1.98705e-07	3.71913e-06
Emb|ENSMUSG00000021728	0.173556	3.98498	11.0771	0.0201934	0.509232	0.085708	3.98493	3.12209	0.218402	0.524402	13.8874	16.7353	-0.269113	-8.0844	3.66894e-06	3.93227e-05
Eml1|ENSMUSG00000058070	-0.114296	6.69011	5.47805	0.0261375	0.550333	-0.0533575	6.69012	1.39489	0.246921	0.559661	110.664	98.7112	0.1649	5.22477	0.000180623	0.000959637
Enah|ENSMUSG00000022995	0.122794	6.21661	7.41331	0.0107081	0.399839	0.0153326	6.21662	0.133462	0.729716	0.89961	69.3284	76.6282	-0.144428	-4.52506	0.000897563	0.00358777
Eno4|ENSMUSG00000048029	0.391535	0.982081	11.9294	0.0153955	0.483265	-0.141183	0.981797	1.89735	0.333059	0.645267	1.67485	2.01409	-0.266092	-3.40398	0.00638294	0.0181449
Enpp1|ENSMUSG00000037370	0.191933	3.28329	6.237	0.0281233	0.56264	0.0976691	3.28352	1.90312	0.228148	0.537142	8.24615	10.2196	-0.309543	-4.74683	0.000190707	0.00100142
Entpd1|ENSMUSG00000048120	-0.190456	4.14771	6.0701	0.0197376	0.509232	0.0415004	4.14777	0.338339	0.565164	0.814046	19.3959	17.4613	0.151586	3.334	0.0048483	0.0144266
Ep300|ENSMUSG00000055024	0.111145	6.51913	7.19219	0.0158894	0.49067	-0.0807858	6.51914	4.29197	0.0621665	0.25458	89.0886	91.225	-0.0341875	-1.22665	0.240621	0.345719
Epha1|ENSMUSG00000029859	0.866769	-1.71539	5.91615	0.0212176	0.520241	-0.0257067	-1.71563	0.00800595	0.929302	0.977212	0.191048	0.317184	-0.731384	-3.00749	0.00846608	0.0229051
Epha3|ENSMUSG00000052504	0.282691	2.04461	6.05105	0.0200346	0.509232	-0.164608	2.0442	2.46254	0.140364	0.413933	3.81805	4.21054	-0.14117	-2.7784	0.0134034	0.0334979
Ephb2|ENSMUSG00000028664	0.22461	2.59008	4.29916	0.0468631	0.656735	0.279761	2.59021	7.55971	0.0100418	0.0759437	4.7555	6.62593	-0.478524	-6.74709	3.60606e-06	3.87788e-05
Ephb6|ENSMUSG00000029869	0.130598	6.27967	7.0826	0.0124101	0.434076	-0.2302	6.27948	24.4822	2.74181e-05	0.000803594	80.446	75.6505	0.08867	2.76687	0.0136098	0.0338969
Epor|ENSMUSG00000006235	-0.217523	3.55342	5.04477	0.0322619	0.583701	-0.262633	3.55335	8.18602	0.00764417	0.0624589	14.0438	10.2038	0.460828	8.0616	9.44275e-07	1.31185e-05
Eps8|ENSMUSG00000015766	-0.145758	4.66354	8.33935	0.0233914	0.532473	0.178071	4.66372	14.1725	0.00322785	0.0335583	25.2096	25.7836	-0.0324799	-1.22964	0.246556	0.352118
Erc1|ENSMUSG00000030172	0.117025	5.67059	4.77601	0.0368466	0.612374	0.101323	5.67065	4.1729	0.0500072	0.223723	45.8064	53.2838	-0.218149	-7.02272	5.00308e-06	5.04729e-05
Espn|ENSMUSG00000028943	-0.648284	-1.51568	5.03414	0.0324308	0.583708	-0.586006	-1.51577	4.67161	0.0388266	0.189607	0.493218	0.231657	1.09024	7.00016	1.83738e-05	0.000145971
Eya4|ENSMUSG00000010461	0.368099	1.28889	4.3042	0.0467427	0.65612	-0.26587	1.28852	2.67156	0.112676	0.366795	2.12878	2.35791	-0.147482	-1.16583	0.267536	0.375894
Faah|ENSMUSG00000034171	0.241821	4.46512	10.4892	0.00294258	0.222794	0.427989	4.46508	38.5564	7.9965e-07	4.38786e-05	16.1696	26.1329	-0.692587	-17.1293	6.26911e-12	2.17563e-09
Faim2|ENSMUSG00000023011	0.17557	7.87038	9.19381	0.00498734	0.283921	0.0569143	7.87035	1.0979	0.303151	0.617703	208.105	245.841	-0.240416	-6.47911	6.09319e-06	5.92973e-05
Fam105a|ENSMUSG00000056069	-0.153294	5.10969	7.96917	0.00840313	0.350702	0.00136057	5.10969	0.000747519	0.97991	0.994507	37.1818	33.4291	0.153494	5.5824	8.08739e-05	0.000490805
Fam115a|ENSMUSG00000036667	-0.0946321	8.85908	8.25178	0.0360634	0.608956	-0.0336709	8.85907	1.16856	0.42591	0.723755	495.446	454.563	0.124248	6.85027	1.55725e-05	0.000127605
Fam132a|ENSMUSG00000023571	-0.160711	4.21119	6.43921	0.0258295	0.550333	0.0136745	4.21133	0.0525897	0.838222	0.943154	19.9142	18.1325	0.135223	4.80379	0.00019071	0.00100142
Fam155a|ENSMUSG00000079157	0.150087	4.98816	7.20054	0.0123953	0.434076	0.216523	4.98819	17.6903	0.000218409	0.00419755	26.8781	34.6919	-0.368169	-12.0753	3.25835e-08	9.31449e-07
Fam161b|ENSMUSG00000021234	0.15513	4.05959	6.10504	0.0359123	0.608365	0.115068	4.0596	3.87309	0.0948314	0.329679	14.5835	17.6485	-0.275208	-6.74282	1.75063e-05	0.00014009
Fam184a|ENSMUSG00000019856	-0.121651	5.59157	9.11256	0.0193494	0.509232	-0.0219478	5.5915	0.336367	0.654844	0.863489	52.0479	47.0092	0.146896	9.01321	7.46657e-08	1.7114e-06
Fam186a|ENSMUSG00000045350	0.729408	-1.89887	5.29396	0.0285676	0.56264	-1.27431	-1.89905	16.775	0.000296146	0.0053653	0.225393	0.171016	0.398312	2.35184	0.0327549	0.069499
Fam3c|ENSMUSG00000029672	0.13304	5.5537	11.899	0.0110421	0.406117	0.0235026	5.55365	0.413662	0.630535	0.849788	43.0383	48.1644	-0.162345	-7.09748	3.90324e-06	4.12228e-05
Fam57b|ENSMUSG00000058966	0.159149	4.71288	5.87547	0.0216287	0.521742	0.314554	4.71302	26.5811	1.52769e-05	0.00049863	21.4677	29.3885	-0.453084	-15.6751	3.09601e-08	8.99867e-07
Fam81a|ENSMUSG00000032224	0.181814	5.18573	6.91061	0.0134098	0.452527	0.62597	5.18594	94.5271	9.39112e-11	3.10178e-08	25.248	42.7937	-0.76123	-16.887	1.97952e-10	2.28991e-08
Fam84a|ENSMUSG00000020607	0.138825	6.14207	10.8501	0.00351922	0.243967	-0.184323	6.14192	21.8919	5.84052e-05	0.00147084	69.7297	67.4517	0.0479192	1.81414	0.0931979	0.161733
Fank1|ENSMUSG00000053111	0.408871	0.528309	6.96751	0.0328049	0.586562	0.0939905	0.52813	0.466078	0.583257	0.826112	1.1319	1.53844	-0.442731	-5.33165	8.77786e-05	0.000526672
Fat1|ENSMUSG00000070047	0.231484	6.12403	8.41274	0.00693209	0.318523	0.110113	6.124	2.12141	0.155708	0.436262	58.8516	75.3718	-0.356943	-6.90724	3.45459e-05	0.000243873
Faxc|ENSMUSG00000028246	0.132351	5.35438	6.35219	0.0173098	0.500628	-0.123096	5.35425	6.35452	0.0172973	0.110893	39.9159	40.174	-0.00929777	-0.287356	0.778141	0.83933
Fbln5|ENSMUSG00000021186	-0.281002	3.14671	5.83437	0.022053	0.523481	-0.0992847	3.14684	0.845988	0.365075	0.676466	10.6058	8.22422	0.366906	7.75653	1.18886e-06	1.5832e-05
Fbxl22|ENSMUSG00000050503	0.595237	-0.907965	5.96852	0.0367784	0.611985	0.694922	-0.907695	10.9537	0.00480256	0.0445618	0.262002	0.64071	-1.29009	-11.4772	1.07763e-08	3.98344e-07
Fbxo32|ENSMUSG00000022358	-0.179249	6.18547	7.41706	0.0106903	0.399839	-0.0177677	6.18532	0.0902605	0.765932	0.913706	79.1856	69.5666	0.186843	4.76816	0.000554327	0.00243848
Fbxw9|ENSMUSG00000008167	0.189586	3.03024	7.20788	0.0428368	0.633368	-0.116466	3.03023	3.1747	0.177308	0.470966	7.7551	8.07731	-0.0587302	-1.24611	0.234229	0.338441
Fcgr3|ENSMUSG00000059498	-0.158486	3.97736	4.70857	0.0381071	0.614628	0.0829933	3.97746	1.45245	0.238422	0.550316	16.4692	15.6922	0.0697161	1.8536	0.0864074	0.152341
Fcho1|ENSMUSG00000070000	-0.102031	6.38573	5.3445	0.0293783	0.568943	-0.128328	6.38585	9.31277	0.00475003	0.0444104	91.5452	78.7476	0.217248	6.4547	9.26791e-06	8.37151e-05
Fendrr|ENSMUSG00000097336	-0.483015	-0.204436	4.48021	0.0427425	0.633368	0.376011	-0.204187	3.08555	0.0892622	0.31855	0.961544	0.90887	0.081278	0.754644	0.462969	0.575668
Ffar3|ENSMUSG00000019429	-0.652184	-0.533886	8.74689	0.00601477	0.30456	-1.9141	-0.534334	81.6096	4.89893e-10	1.15259e-07	1.36313	0.222131	2.61745	12.308	2.78441e-06	3.17489e-05
Fgf1|ENSMUSG00000036585	0.106317	6.34521	6.08012	0.0231239	0.531139	0.0219047	6.34527	0.303292	0.61854	0.842928	77.254	84.5637	-0.130429	-5.63619	7.32495e-05	0.000453776
Fgf17|ENSMUSG00000022101	-0.827613	-0.441773	11.1989	0.00222371	0.194967	0.870226	-0.441322	13.2572	0.00102024	0.0141769	0.677609	0.719442	-0.0864267	-0.896023	0.383012	0.498203
Fgf3|ENSMUSG00000031074	-0.448943	3.2063	11.109	0.00230327	0.197601	0.47604	3.2067	14.5275	0.000644293	0.00984991	9.08113	9.53845	-0.0708828	-0.973914	0.348405	0.463082
Fhl4|ENSMUSG00000050035	0.474652	0.59413	6.42293	0.0167535	0.498773	-0.284318	0.593904	2.76615	0.10676	0.354457	1.25398	1.41356	-0.172818	-1.63132	0.124418	0.205101
Fibcd1|ENSMUSG00000026841	-0.334316	3.89498	37.4352	7.99366e-06	0.0123806	-0.540956	3.89478	110.4	1.54209e-11	7.56724e-09	21.4659	11.7464	0.869833	20.6153	2.25493e-10	2.54075e-08
Fig4|ENSMUSG00000038417	-0.124149	5.75277	6.54956	0.0158057	0.490598	0.125129	5.75282	7.30773	0.0112271	0.081955	53.327	53.359	-0.000865564	-0.0273786	0.978478	0.984663
Flna|ENSMUSG00000031328	0.153956	7.25647	12.7241	0.00124197	0.150966	0.129805	7.25681	9.70848	0.00403619	0.039432	134.132	166.668	-0.313315	-12.5705	6.86288e-10	5.41294e-08
Flot1|ENSMUSG00000059714	0.185301	5.23629	18.5183	0.00093175	0.131977	-0.0381244	5.23621	0.916906	0.468751	0.754315	35.2653	39.0986	-0.148865	-6.32273	7.32803e-05	0.000453804
Fmnl1|ENSMUSG00000055805	-0.170989	6.19787	9.00682	0.00539208	0.290784	-0.145711	6.198	7.40533	0.0107509	0.0796123	85.9478	69.4767	0.306932	7.8412	6.04949e-07	9.18306e-06
Fn3k|ENSMUSG00000025175	-0.164256	4.80597	7.561	0.0100315	0.390595	-0.0487149	4.80592	0.766585	0.40591	0.708633	31.0523	26.8797	0.208181	8.10176	4.10782e-06	4.2965e-05
Fnbp1l|ENSMUSG00000039735	-0.100339	8.21209	4.19268	0.0494919	0.66942	-0.094047	8.21204	4.27263	0.0475126	0.216262	324.337	283.044	0.196469	6.21339	1.26312e-05	0.000108128
Fndc9|ENSMUSG00000048721	-0.306594	3.94919	7.88282	0.00871231	0.357226	0.389418	3.94946	14.5088	0.000648578	0.00988381	13.6851	15.843	-0.211234	-2.53217	0.0248762	0.0554351
Foxg1|ENSMUSG00000020950	-0.120717	6.97763	4.32844	0.0461679	0.653732	-0.0699509	6.97773	1.61852	0.213135	0.518516	135.576	117.834	0.202345	4.65059	0.000247027	0.00124127
Foxo1|ENSMUSG00000044167	-0.128454	7.45676	5.85894	0.0217982	0.521742	-0.0963472	7.45676	3.75141	0.0622938	0.254919	193.023	164.801	0.228044	7.93906	3.32613e-06	3.63903e-05
Foxp4|ENSMUSG00000023991	0.292255	4.30054	22.9145	4.30257e-05	0.0254282	-0.0457202	4.30048	0.641507	0.484697	0.76502	17.4694	20.4746	-0.228999	-6.3187	8.57233e-06	7.87022e-05
Fpr2|ENSMUSG00000052270	-0.673144	-1.21774	4.68223	0.0386122	0.615196	-0.0489571	-1.21781	0.0248963	0.87569	0.957289	0.557652	0.337061	0.726354	3.62872	0.00321865	0.0102346
Frem2|ENSMUSG00000037016	0.266525	3.85057	5.03039	0.0324906	0.583708	0.314582	3.85062	8.03072	0.0081744	0.0654427	10.818	16.1832	-0.581054	-7.42707	2.64943e-06	3.04861e-05
Frem3|ENSMUSG00000042353	1.12971	1.13358	11.9279	0.00167793	0.169165	2.20445	1.13443	71.8086	1.96417e-09	3.62739e-07	0.268646	3.17743	-3.56408	-15.6553	1.85293e-11	4.12205e-09
Frrs1l|ENSMUSG00000045589	-0.114246	8.49488	5.27039	0.0288964	0.564212	-0.147293	8.49478	10.446	0.00299597	0.0316262	402.925	335.933	0.26234	9.27315	2.57334e-06	2.98003e-05
Fry|ENSMUSG00000056602	0.104074	7.7797	9.36188	0.0196904	0.509232	-0.0283608	7.77965	0.753618	0.498959	0.774901	210.021	221.715	-0.078177	-3.22869	0.00576659	0.0166964
Fsbp|ENSMUSG00000094595	-0.263988	3.00861	7.38725	0.0108326	0.401865	-0.43909	3.00839	24.7666	2.52938e-05	0.000754202	10.4542	6.44563	0.69769	12.0847	2.89037e-08	8.50146e-07
Fstl5|ENSMUSG00000034098	0.17922	3.62327	4.60825	0.0400712	0.62067	0.0366398	3.62313	0.231973	0.633582	0.851903	10.7445	12.669	-0.237714	-5.25029	7.91379e-05	0.000481487
Fut11|ENSMUSG00000039357	-0.166054	3.96925	7.78775	0.0258272	0.550333	-0.29154	3.96927	27.0654	2.93179e-05	0.000844857	18.852	13.6001	0.4711	15.7502	6.93605e-11	1.07459e-08
Fv1|ENSMUSG00000070583	-0.254862	2.20961	8.16841	0.0259061	0.550333	0.130286	2.20969	2.38861	0.227334	0.536107	4.93078	4.55165	0.115427	2.82595	0.0122829	0.031201
Gabbr2|ENSMUSG00000039809	0.122704	6.38982	4.98346	0.0332495	0.59015	-0.0776693	6.38988	2.24034	0.144967	0.421289	79.5949	83.1882	-0.0637022	-1.49325	0.154542	0.244383
Gabra2|ENSMUSG00000000560	0.234221	5.89478	5.24019	0.0293236	0.568943	0.193392	5.8945	4.10357	0.0518274	0.228357	48.3593	67.7549	-0.486532	-6.85359	1.14206e-05	9.97835e-05
Gabra3|ENSMUSG00000031343	0.219771	5.81217	17.0042	0.000273822	0.0690152	0.400369	5.81237	63.5558	7.06009e-09	9.62358e-07	41.6043	63.6339	-0.613062	-17.2344	3.47929e-12	1.37211e-09
Gabra5|ENSMUSG00000055078	0.174224	4.77556	6.14552	0.019054	0.508495	0.476935	4.77573	52.9571	4.37464e-08	4.13675e-06	20.3642	31.6726	-0.637195	-12.6882	3.34779e-08	9.47649e-07
Gabrd|ENSMUSG00000029054	-0.137963	6.99178	5.70159	0.0234869	0.532473	-0.342246	6.99172	41.7335	4.00215e-07	2.47255e-05	154.513	110.792	0.479872	16.7735	1.57032e-08	5.26735e-07
Gabrr2|ENSMUSG00000023267	0.571852	-0.113633	7.43502	0.0111703	0.407336	0.111607	-0.114024	0.369486	0.581001	0.825299	0.667711	0.981137	-0.555231	-4.8665	0.00015423	0.000841305
Galns|ENSMUSG00000015027	0.264776	2.22354	7.06484	0.0240869	0.539851	0.473981	2.22364	25.8346	1.87589e-05	0.00059225	3.40694	5.58847	-0.713977	-11.3957	3.99582e-08	1.0667e-06
Galnt16|ENSMUSG00000021130	0.0962449	6.62664	6.37301	0.0357691	0.607578	0.408745	6.62679	126.408	3.04035e-12	2.08135e-09	78.7277	111.712	-0.504834	-20.0871	5.75315e-13	4.34037e-10
Galnt18|ENSMUSG00000038296	-0.130997	5.01308	8.02953	0.0257716	0.550333	-0.17994	5.01302	16.7314	0.00113174	0.0153415	36.6598	29.6728	0.305059	11.0644	3.99283e-09	1.90377e-07
Gap43|ENSMUSG00000047261	0.151915	7.84993	12.3906	0.00140762	0.158521	-0.0543991	7.8498	1.75657	0.195124	0.49538	219.421	235.484	-0.101925	-3.74971	0.00286327	0.00927277
Gast|ENSMUSG00000017165	1.01832	-1.58619	7.07503	0.0124524	0.434243	0.49669	-1.58603	2.22625	0.146193	0.423549	0.117936	0.412769	-1.80733	-5.61804	4.75094e-05	0.000316583
Gatsl2|ENSMUSG00000015944	0.0963523	7.17054	5.68745	0.0308486	0.577846	0.106696	7.17069	7.7567	0.0111296	0.0814793	130.824	151.291	-0.209705	-9.16996	1.04729e-07	2.23054e-06
Gcnt1|ENSMUSG00000038843	-0.572572	2.63266	5.54953	0.0252558	0.548041	0.372962	2.63235	2.80468	0.104453	0.350045	7.01121	6.33051	0.14734	0.737439	0.474221	0.586088
Gda|ENSMUSG00000058624	0.15056	7.62995	7.9214	0.00856728	0.354673	-0.0766372	7.62973	2.23349	0.145562	0.422433	183.988	195.847	-0.0901161	-2.2763	0.0411925	0.0839239
Gdap1l1|ENSMUSG00000017943	0.12499	5.03595	4.55624	0.0411331	0.62665	0.250936	5.03603	20.9635	7.73606e-05	0.00185309	27.9356	36.0095	-0.366269	-11.5796	2.05308e-09	1.20568e-07
Gdnf|ENSMUSG00000022144	0.219273	2.90316	6.71184	0.0253558	0.548041	0.360622	2.90339	21.3503	7.31689e-05	0.00177213	5.41834	8.29742	-0.61481	-11.6269	9.85603e-08	2.12186e-06
Gfra4|ENSMUSG00000027316	0.157073	5.15327	13.8276	0.00651389	0.308402	-0.0900562	5.1532	5.31262	0.0927643	0.325115	34.2706	35.9506	-0.0690406	-3.3421	0.00399844	0.0122646
Ghitm|ENSMUSG00000041028	-0.0952211	9.24102	6.99219	0.0368954	0.612374	-0.114147	9.24092	11.9506	0.00738795	0.0609325	663.523	573.599	0.210106	13.2814	1.04441e-09	7.22013e-08
Gipc2|ENSMUSG00000039131	-0.358741	2.63383	11.23	0.00219681	0.194967	-0.252436	2.63381	6.17896	0.0187656	0.117157	8.22667	5.36924	0.615589	10.6067	6.09771e-08	1.45572e-06
Git1|ENSMUSG00000011877	-0.0938865	8.2096	5.23504	0.0366868	0.611985	-0.0812165	8.20976	4.34506	0.0525694	0.230483	317.7	283.04	0.166659	9.5776	1.02966e-05	9.14366e-05
Glb1|ENSMUSG00000045594	0.158615	3.77485	5.99295	0.0444331	0.641099	0.249275	3.77496	16.5259	0.000728626	0.010816	11.6077	15.1896	-0.388002	-11.2868	3.99362e-09	1.90377e-07
Gli3|ENSMUSG00000021318	-0.178899	4.95499	6.17184	0.0188215	0.508495	0.173084	4.95524	6.66176	0.0150204	0.100418	32.051	31.8379	0.00962539	0.196375	0.847175	0.891514
Glra2|ENSMUSG00000018589	0.157438	4.07475	6.04649	0.0329687	0.587804	0.406969	4.07481	45.2797	1.91723e-07	1.39527e-05	13.1842	19.4901	-0.563932	-16.1138	2.84291e-09	1.53199e-07
Gm10154|ENSMUSG00000066116	0.889102	1.97462	5.18088	0.0301829	0.575172	-0.323414	1.97451	0.814467	0.374039	0.68363	2.94497	4.36781	-0.568657	-3.87928	0.00130487	0.00486838
Gm10222|ENSMUSG00000067736	0.242528	2.82413	10.1853	0.0145604	0.466451	-0.00681608	2.82425	0.00952418	0.941237	0.981472	6.27904	7.46485	-0.249569	-6.63166	4.84292e-06	4.92005e-05
Gm10260|ENSMUSG00000069117	-2.44525	1.66484	45.9647	1.66125e-07	0.00284721	0.299871	1.66561	0.619565	0.437424	0.733238	9.5323	-0.443755	NA	6.03711	5.45717e-05	0.000355187
Gm10516|ENSMUSG00000097316	0.360804	2.10489	5.09322	0.0315043	0.57997	-0.182502	2.10497	1.42655	0.241747	0.554206	3.73746	4.26947	-0.191998	-1.97891	0.0644464	0.120621
Gm10658|ENSMUSG00000074284	0.668665	-0.618245	9.97784	0.00634276	0.30456	-0.0998968	-0.618321	0.258775	0.661375	0.865924	0.391822	0.636346	-0.699614	-5.55365	4.90008e-05	0.000324156
Gm10709|ENSMUSG00000074516	0.84181	2.15731	5.44768	0.0265223	0.553339	-0.697576	2.15731	4.45971	0.0431971	0.203654	3.82835	4.2074	-0.136209	-0.908729	0.37719	0.492253
Gm10710|ENSMUSG00000074517	0.571239	0.393122	8.07847	0.00800317	0.34121	-0.166371	0.392833	0.858543	0.36159	0.67388	0.970604	1.27228	-0.390459	-3.77354	0.00210937	0.00718567
Gm11190|ENSMUSG00000055045	-0.850608	0.8385	17.2262	0.000254267	0.0660284	0.3847	0.83895	3.86385	0.058715	0.245872	1.99459	1.59668	0.321017	2.32555	0.0335163	0.0708545
Gm11222|ENSMUSG00000085627	-0.362917	0.687621	6.83794	0.0379553	0.614628	0.207225	0.687624	2.54653	0.205139	0.508562	1.7013	1.53737	0.146171	2.64747	0.0175416	0.0416221
Gm11353|ENSMUSG00000060198	-0.246758	2.5795	9.7177	0.0183554	0.506829	0.233812	2.57953	9.63363	0.0171854	0.110478	6.26485	6.25101	0.00319174	0.0751191	0.941108	0.958503
Gm11405|ENSMUSG00000083767	0.302381	1.6232	7.11583	0.0278313	0.56264	-0.249309	1.62318	5.69066	0.0507814	0.226132	2.86703	2.97566	-0.0536507	-0.909139	0.381097	0.496232
Gm11542|ENSMUSG00000085051	1.01949	-2.30271	5.05491	0.0321017	0.583701	-0.854664	-2.30274	4.54885	0.0412955	0.197949	0.126469	0.139923	-0.145846	-0.502108	0.622231	0.714226
Gm11549|ENSMUSG00000085007	-0.859913	0.556885	5.80591	0.0223521	0.525181	0.141671	0.556683	0.164791	0.687683	0.87882	1.17645	1.46704	-0.318471	-0.961453	0.358668	0.473639
Gm11641|ENSMUSG00000085733	0.494141	-0.0962847	5.62985	0.0243039	0.541723	-0.827524	-0.0965873	18.9293	0.000146127	0.00306457	0.977594	0.769004	0.346244	2.45097	0.0282792	0.0614451
Gm11953|ENSMUSG00000082816	1.17271	-2.20783	8.10444	0.00791384	0.340792	-0.805774	-2.20795	4.78441	0.0367014	0.18255	0.149333	0.188662	-0.337272	-1.09005	0.301325	0.413098
Gm12060|ENSMUSG00000085415	-0.621343	0.206696	9.75755	0.00395339	0.262527	0.391016	0.206571	4.44898	0.0434325	0.204539	1.29164	1.11321	0.214472	1.49853	0.157259	0.247664
Gm12184|ENSMUSG00000078154	-0.310961	3.89349	11.3601	0.00208835	0.192308	0.273775	3.89374	10.0698	0.00348478	0.035373	15.2537	14.8652	0.0372234	0.926276	0.368654	0.48355
Gm12216|ENSMUSG00000081769	0.750007	-1.5743	5.73617	0.0231039	0.531139	-0.653776	-1.57424	5.3934	0.027233	0.15025	0.25672	0.260708	-0.0222421	-0.0973706	0.923571	0.94648
Gm12397|ENSMUSG00000081309	0.409	0.29496	6.44441	0.0379881	0.614628	0.0559898	0.294948	0.149494	0.75216	0.908783	0.958808	1.3276	-0.469511	-4.65061	0.000230492	0.00117356
Gm12540|ENSMUSG00000083353	-0.853601	-1.66839	7.18514	0.0118529	0.423935	0.454225	-1.66857	2.3306	0.137397	0.408878	0.363869	0.286881	0.342967	2.45166	0.0257437	0.0569175
Gm12583|ENSMUSG00000082878	0.858829	-1.06693	7.04812	0.0126039	0.43817	-0.714612	-1.06708	5.69778	0.0235366	0.136233	0.359094	0.407902	-0.183861	-0.827842	0.419342	0.533228
Gm12599|ENSMUSG00000081325	0.754466	-1.1566	5.68284	0.0236975	0.534826	-0.338874	-1.15686	1.37724	0.249865	0.563031	0.309833	0.41859	-0.434047	-1.66502	0.128418	0.210554
Gm12722|ENSMUSG00000081819	0.250743	2.08693	6.17753	0.0356978	0.606969	0.0220021	2.08681	0.0551337	0.843981	0.945556	3.71373	4.48945	-0.27367	-4.44394	0.000873116	0.00351026
Gm12835|ENSMUSG00000086896	0.766808	-0.791592	10.9064	0.00318238	0.230138	-0.225582	-0.791656	1.17136	0.335157	0.648177	0.390201	0.545387	-0.483062	-3.69237	0.00197021	0.0068061
Gm12892|ENSMUSG00000083679	-0.343739	7.67638	12.9655	0.00113518	0.142013	0.0840094	7.67646	0.869944	0.358466	0.670586	232.658	192.612	0.272514	4.24635	0.0018968	0.00660385
Gm12930|ENSMUSG00000087011	-0.640283	-0.0356653	6.71477	0.014656	0.467764	0.0740959	-0.0353574	0.0970467	0.757572	0.910977	1.19587	0.799284	0.581279	4.52481	0.000361448	0.00171737
Gm13139|ENSMUSG00000067916	-0.424123	1.31638	4.5231	0.0418263	0.631654	0.460041	1.31656	5.94141	0.0209733	0.126174	2.54132	2.60262	-0.0343878	-0.267203	0.793332	0.850799
Gm13322|ENSMUSG00000085193	0.719829	-1.60781	7.39283	0.0178511	0.504255	-0.322963	-1.60781	1.86543	0.237506	0.549234	0.227836	0.302633	-0.409573	-2.26619	0.0373252	0.077537
Gm13421|ENSMUSG00000085929	0.763096	-1.25615	5.18244	0.0301601	0.575172	-0.53046	-1.25616	3.16574	0.0853997	0.310224	0.300745	0.362392	-0.269009	-1.05041	0.321212	0.433648
Gm13589|ENSMUSG00000085950	-0.938649	-2.10944	7.18138	0.0118728	0.423935	0.621571	-2.10937	3.6261	0.0665736	0.266873	0.22618	0.188701	0.261372	1.54386	0.141057	0.226989
Gm136|ENSMUSG00000071015	0.701118	-1.08494	4.90594	0.0345462	0.597761	-1.00473	-1.08515	11.9505	0.00166503	0.0205438	0.438132	0.327836	0.41839	2.02866	0.0596892	0.113293
Gm13710|ENSMUSG00000087362	1.95142	-2.68632	12.2034	0.00151085	0.16185	-0.887021	-2.68641	3.15836	0.0857473	0.310895	0.0282464	0.107825	-1.93256	-2.9006	0.0176033	0.0417456
Gm14169|ENSMUSG00000086118	0.221899	2.56686	6.35685	0.0318459	0.582505	-0.107653	2.56669	1.69817	0.265031	0.57927	5.64816	6.16291	-0.12583	-2.37777	0.0297103	0.0640017
Gm14634|ENSMUSG00000085891	0.506492	-0.530694	5.82724	0.0378452	0.614628	-0.323326	-0.530786	2.86197	0.147986	0.426197	0.57295	0.647469	-0.176403	-1.69699	0.109753	0.185094
Gm14822|ENSMUSG00000083049	0.772422	-1.36465	6.13386	0.019158	0.509232	-0.246936	-1.3646	0.755803	0.391593	0.698982	0.244735	0.356114	-0.541121	-3.77529	0.00151485	0.00549796
Gm14872|ENSMUSG00000084880	0.259842	1.9253	4.49575	0.042408	0.632577	-0.0889105	1.92517	0.635047	0.43686	0.73305	3.5261	3.90681	-0.147917	-2.42103	0.0282062	0.0613326
Gm15379|ENSMUSG00000082208	0.52174	-0.647744	4.44059	0.0436087	0.637721	-0.43419	-0.647814	3.68362	0.0645692	0.261551	0.527868	0.561312	-0.0886235	-0.503604	0.62646	0.717656
Gm15446|ENSMUSG00000090015	0.770163	5.19172	7.23456	0.0115941	0.41834	-0.0251224	5.19183	0.00872342	0.926211	0.975871	27.8527	40.3636	-0.535237	-4.19552	0.000758541	0.0031361
Gm15487|ENSMUSG00000080242	-0.333162	6.90319	14.8933	0.000565301	0.106469	0.01256	6.90302	0.0227164	0.881212	0.959364	135.271	109.875	0.29999	4.78979	0.0004321	0.00198872
Gm15676|ENSMUSG00000085583	0.677068	-0.374414	13.7126	0.00417431	0.26885	-0.0336097	-0.374456	0.0417597	0.873771	0.957289	0.545958	0.828022	-0.60088	-5.9871	0.000178765	0.000951512
Gm15690|ENSMUSG00000086165	-0.71956	-1.88535	4.46372	0.0431006	0.633664	0.133205	-1.88539	0.162828	0.689447	0.879941	0.297327	0.196274	0.599179	2.56421	0.0213565	0.0489433
Gm15782|ENSMUSG00000084083	0.940165	-1.49344	5.14088	0.0307782	0.577846	0.182049	-1.49348	0.247655	0.622383	0.845168	0.17981	0.403077	-1.16459	-4.84026	0.00066809	0.00283487
Gm15832|ENSMUSG00000085894	-0.372165	3.25937	12.9211	0.00115405	0.143328	0.0454708	3.25943	0.219958	0.642485	0.857061	11.1065	8.81194	0.33387	4.62472	0.000329382	0.00158454
Gm15834|ENSMUSG00000085054	0.500177	-0.346629	4.99845	0.0342658	0.597761	-0.388731	-0.346712	3.67408	0.068235	0.271029	0.692642	0.717225	-0.050316	-0.360124	0.72459	0.796572
Gm17091|ENSMUSG00000091817	-0.645208	-0.106578	9.10544	0.00517437	0.287551	0.0091639	-0.106428	0.00205502	0.96489	0.990427	1.0924	0.717238	0.606978	5.36722	0.000522464	0.00232277
Gm17322|ENSMUSG00000097604	0.348041	1.97665	8.62521	0.00633263	0.30456	-0.486106	1.97628	20.5651	8.74282e-05	0.00205134	3.86665	3.62926	0.0914075	1.57473	0.135154	0.2193
Gm1862|ENSMUSG00000080968	0.410253	0.531668	6.01842	0.0280114	0.56264	-0.264743	0.531587	2.93095	0.126665	0.390361	1.21955	1.36787	-0.165584	-1.96815	0.0669574	0.124381
Gm19345|ENSMUSG00000092216	0.425991	0.824475	4.58225	0.0405981	0.623461	0.280493	0.82471	2.51151	0.123572	0.38499	1.28107	1.98005	-0.628188	-4.5161	0.000608618	0.00263492
Gm1976|ENSMUSG00000066057	0.152804	4.76377	4.63917	0.039454	0.618556	-0.0716791	4.76367	1.19582	0.282919	0.598416	25.7992	27.3684	-0.0851872	-1.97614	0.0723994	0.132156
Gm20489|ENSMUSG00000092463	-0.589812	-0.859829	6.60059	0.0284535	0.56264	0.848322	-0.859583	15.7165	0.000752348	0.0111585	0.454872	0.567569	-0.319336	-3.00887	0.00810883	0.0221268
Gm20708|ENSMUSG00000093485	0.379124	0.869392	4.18311	0.049736	0.66942	1.01181	0.86964	36.7887	1.19261e-06	6.02442e-05	1.01325	2.47261	-1.28704	-14.3661	1.47896e-10	1.88991e-08
Gm20939|ENSMUSG00000095193	-0.382075	0.963369	7.26851	0.020173	0.509232	0.259512	0.963405	3.91156	0.0873683	0.31437	2.05252	1.89823	0.112735	1.36024	0.19264	0.290391
Gm21464|ENSMUSG00000093954	0.67214	0.519121	6.84033	0.0138432	0.457799	-0.07403	0.51941	0.096409	0.758343	0.911208	1.0222	1.4866	-0.540342	-3.85832	0.00146607	0.00535562
Gm22596|ENSMUSG00000088226	-0.682668	-1.73865	5.04231	0.0323009	0.583701	0.150149	-1.73861	0.2542	0.61784	0.842576	0.338491	0.229994	0.557523	3.67152	0.00198986	0.00685158
Gm26577|ENSMUSG00000097923	0.454596	0.271652	5.49206	0.025962	0.550333	-0.287927	0.271401	2.78267	0.107865	0.357228	1.07547	1.16533	-0.11577	-1.07511	0.309412	0.421686
Gm266|ENSMUSG00000010529	-0.285721	1.51095	5.81474	0.0418695	0.631654	0.126135	1.51092	1.26348	0.342689	0.656006	3.18261	2.89689	0.135702	2.73991	0.0141603	0.0350112
Gm26610|ENSMUSG00000097674	0.738801	-1.40219	6.61376	0.0153477	0.482764	-0.308779	-1.40214	1.34715	0.254989	0.568512	0.251149	0.364504	-0.53739	-3.00589	0.00929467	0.0247061
Gm26645|ENSMUSG00000097684	-0.499804	3.52992	9.10778	0.00516933	0.287551	0.348601	3.53024	5.21778	0.0296528	0.159202	13.0286	11.4948	0.180705	1.92501	0.0861619	0.151977
Gm2694|ENSMUSG00000097248	0.399651	0.695945	6.63984	0.022845	0.529746	-0.258699	0.69587	3.24078	0.112482	0.366418	1.43752	1.59547	-0.150397	-1.82849	0.092204	0.160474
Gm26947|ENSMUSG00000098055	-0.55823	-0.334362	4.89559	0.0347236	0.59872	0.0861899	-0.334485	0.136709	0.714189	0.893446	0.926509	0.687165	0.43115	2.32232	0.0467391	0.0929639
Gm27040|ENSMUSG00000098129	0.591671	-1.01018	7.62257	0.0254509	0.548041	-0.308041	-1.01008	2.3776	0.21418	0.519347	0.376825	0.468707	-0.314791	-2.69962	0.0168944	0.0403956
Gm2904|ENSMUSG00000079101	-0.784447	-1.35639	6.17359	0.0188062	0.508495	0.188768	-1.35651	0.397392	0.533243	0.79431	0.489757	0.333631	0.553814	3.71319	0.00179745	0.00631875
Gm2986|ENSMUSG00000083700	-1.13982	-1.82946	10.8807	0.00251938	0.204643	0.859498	-1.82932	6.69757	0.014777	0.099255	0.340205	0.282307	0.269138	1.74952	0.099802	0.171157
Gm3636|ENSMUSG00000091754	0.501188	0.714329	8.16101	0.00772299	0.33595	0.181277	0.714273	1.23571	0.277286	0.592262	1.15983	1.82756	-0.656007	-7.05406	1.19187e-05	0.000103046
Gm3696|ENSMUSG00000092167	0.763286	-0.452076	6.29859	0.0177447	0.503636	0.47161	-0.451996	2.99363	0.0939369	0.327587	0.377245	0.907786	-1.26685	-9.27927	4.60091e-08	1.18022e-06
Gm3756|ENSMUSG00000091639	-0.588541	-0.896338	7.1462	0.0234366	0.532473	0.734104	-0.896313	12.6021	0.00256504	0.028114	0.519579	0.577947	-0.153593	-1.2938	0.215354	0.316546
Gm4204|ENSMUSG00000079139	-0.0888375	7.44627	4.75847	0.0466051	0.65612	0.0161093	7.4462	0.182696	0.70035	0.886781	182.305	173.718	0.069611	3.62274	0.00213436	0.0072519
Gm4342|ENSMUSG00000083911	0.383939	0.947667	5.45814	0.026389	0.553339	0.0334574	0.947515	0.0477768	0.828468	0.939948	1.57023	2.07644	-0.403134	-4.42941	0.000697494	0.00293191
Gm4750|ENSMUSG00000087235	0.48409	-0.177541	4.62862	0.0396635	0.618556	-0.176279	-0.177699	0.741906	0.395928	0.702147	0.743362	0.907656	-0.288081	-1.99781	0.0667917	0.124153
Gm4784|ENSMUSG00000082189	0.549823	0.000561346	5.89857	0.0213942	0.521742	-0.181111	0.000447732	0.712645	0.405293	0.708344	0.766657	1.02428	-0.417951	-3.62985	0.00224625	0.00758453
Gm5111|ENSMUSG00000052730	-0.396294	0.536984	4.29213	0.0470318	0.658103	-0.674828	0.536548	14.6465	0.000617616	0.00956498	2.14928	1.07735	0.996358	8.26221	1.08514e-05	9.56489e-05
Gm5424|ENSMUSG00000046687	-0.134011	6.04009	6.62814	0.0152471	0.481253	0.116445	6.04017	5.53643	0.0254222	0.143438	66.0148	65.443	0.0125502	0.430287	0.67256	0.756652
Gm5535|ENSMUSG00000074758	0.614762	-0.346063	5.20265	0.0298643	0.574461	0.323967	-0.346234	1.74666	0.196353	0.496772	0.436446	0.883815	-1.01794	-7.08518	1.83295e-06	2.25091e-05
Gm5620|ENSMUSG00000056904	-0.568196	-0.337094	5.0645	0.031951	0.583182	0.0152314	-0.337137	0.00413248	0.949173	0.98428	0.940512	0.673391	0.482002	2.93346	0.0123287	0.0313079
Gm5786|ENSMUSG00000066487	0.887054	1.50701	12.0417	0.00160663	0.164148	-0.187109	1.50722	0.698811	0.409836	0.711506	2.01741	3.17663	-0.654994	-4.34801	0.00135264	0.00501517
Gm5822|ENSMUSG00000089993	0.210736	3.25772	4.70888	0.0381012	0.614628	-0.0157637	3.25763	0.0311555	0.861088	0.952681	8.88047	10.0927	-0.18461	-2.84465	0.0116336	0.0298036
Gm5873|ENSMUSG00000093651	0.270938	1.63164	6.48439	0.0452951	0.648008	-0.0935002	1.63161	0.914263	0.453313	0.7438	2.74224	3.10929	-0.18123	-3.52419	0.00345746	0.0108449
Gm5900|ENSMUSG00000094685	-0.285893	3.56417	6.07283	0.0197124	0.509232	0.309194	3.5642	7.97407	0.00837765	0.0666448	12.0964	12.2617	-0.0195786	-0.273711	0.788868	0.847548
Gm6104|ENSMUSG00000062588	-0.196566	3.02156	5.89574	0.0341589	0.597761	0.211793	3.02156	7.84505	0.0141429	0.0960475	8.04585	8.19115	-0.0258212	-0.504123	0.620647	0.712784
Gm6382|ENSMUSG00000082675	-0.140068	4.27783	8.35738	0.046363	0.654825	0.175207	4.27785	14.8319	0.00782593	0.063431	19.4201	19.9275	-0.0372102	-1.21414	0.248379	0.35446
Gm6517|ENSMUSG00000082420	-0.562175	-0.154847	5.61216	0.0245102	0.543323	0.0708432	-0.154925	0.105574	0.74751	0.906747	1.06673	0.782338	0.447331	3.39656	0.00517035	0.0152164
Gm6969|ENSMUSG00000066553	-0.373583	4.21895	8.30227	0.00726781	0.324689	0.547424	4.21883	19.7679	0.000112037	0.00249902	18.3373	20.9481	-0.192038	-2.75995	0.0173172	0.0411909
Gm7244|ENSMUSG00000091003	-0.448364	-0.0938477	4.88958	0.034827	0.599344	-1.49397	-0.0941389	57.9017	1.81642e-08	2.1079e-06	1.72299	0.416879	2.04721	26.1603	8.91822e-12	2.49595e-09
Gm7353|ENSMUSG00000055452	0.252684	2.19984	8.26705	0.0281036	0.56264	-0.160288	2.1998	3.85448	0.13574	0.406013	4.26477	4.55977	-0.0964954	-1.71438	0.104784	0.178133
Gm7701|ENSMUSG00000091363	-0.197188	3.0895	7.11981	0.0299334	0.575066	0.0333789	3.08946	0.236141	0.693492	0.883061	9.38252	8.38627	0.161946	3.82444	0.00181224	0.00635913
Gm8121|ENSMUSG00000051116	-0.163611	3.63665	8.24394	0.043025	0.633664	0.269921	3.63668	26.2498	0.000354813	0.00614305	12.1807	13.1891	-0.114756	-4.27945	0.000507473	0.00226892
Gm8129|ENSMUSG00000059159	0.165256	3.94416	6.53876	0.0303622	0.575172	0.00671338	3.94409	0.0128096	0.923796	0.975294	14.4052	16.0993	-0.160411	-4.00529	0.00107147	0.00415008
Gm8995|ENSMUSG00000063286	-0.224453	2.51874	5.68303	0.0345171	0.597761	0.231409	2.51884	6.76301	0.0224869	0.131903	5.83984	5.90359	-0.0156627	-0.326689	0.748159	0.816225
Gm9083|ENSMUSG00000083033	-0.708113	-1.09396	5.34066	0.0279285	0.56264	0.634926	-1.09382	4.77907	0.036799	0.182824	0.504446	0.497404	0.0202815	0.114118	0.910751	0.938165
Gm9320|ENSMUSG00000093514	-0.311854	1.21364	4.47456	0.0428647	0.633368	0.174788	1.21369	1.61197	0.221594	0.52852	2.42039	2.19181	0.143116	1.63316	0.122244	0.202111
Gm9754|ENSMUSG00000029360	-0.625806	1.46643	7.64055	0.00968637	0.384293	-0.4059	1.46675	3.42171	0.0742828	0.28516	4.07547	2.03577	1.00139	8.52931	3.55773e-06	3.84395e-05
Gm9825|ENSMUSG00000096403	-0.28274	4.75404	7.79987	0.00903332	0.367748	0.0443987	4.75392	0.208582	0.651192	0.860921	29.1088	24.9012	0.225238	3.45183	0.00506252	0.0149657
Gm996|ENSMUSG00000029419	-0.10124	6.63988	6.10816	0.026982	0.556729	-0.164785	6.63999	17.9848	0.000198306	0.00390585	110.572	92.866	0.25176	9.83358	7.99116e-08	1.80655e-06
Gm9996|ENSMUSG00000056316	-0.540822	0.881787	10.9128	0.00248767	0.204026	-0.021934	0.881646	0.0203353	0.890251	0.962123	2.27275	1.6347	0.475417	5.52079	3.75207e-05	0.000260945
Gnb1l|ENSMUSG00000000884	0.388125	1.36617	10.372	0.00920334	0.372019	-0.102606	1.36618	0.860457	0.449548	0.741501	2.15258	2.5868	-0.265104	-4.22679	0.00148429	0.00540513
Gnb2|ENSMUSG00000029713	-0.0939133	8.49466	5.84327	0.0367372	0.611985	-0.0803661	8.4947	4.71508	0.0556411	0.23873	388.525	344.647	0.172887	8.20049	3.91894e-07	6.40315e-06
Gnb4|ENSMUSG00000027669	0.24609	5.71468	7.8892	0.00868818	0.357226	0.000317966	5.71459	1.46922e-05	0.996967	0.999186	44.7211	53.9522	-0.270726	-3.8496	0.00199352	0.0068555
Gnb5|ENSMUSG00000032192	-0.186258	7.31039	9.73206	0.00399478	0.263333	0.0299152	7.31044	0.279857	0.600713	0.834308	168.953	151.033	0.161756	4.57385	0.000802494	0.00327323
Gng3|ENSMUSG00000071658	0.22416	6.44058	17.3102	0.000247266	0.0660284	0.168071	6.44051	11.2319	0.0021971	0.0251735	72.6191	95.2941	-0.392039	-12.8558	2.0321e-08	6.41109e-07
Gng4|ENSMUSG00000021303	0.230263	4.20506	8.73758	0.00603848	0.30456	0.140406	4.20498	3.77195	0.0616223	0.253126	15.4231	20.132	-0.384396	-6.43365	7.55819e-06	7.05486e-05
Gnl1|ENSMUSG00000024429	-0.148363	7.38229	17.1421	0.000912162	0.131531	0.00074465	7.38236	0.000492082	0.985851	0.996425	177.867	161.024	0.143522	6.78433	7.41039e-06	6.95613e-05
Gnpat|ENSMUSG00000031985	-0.107151	6.10159	10.6992	0.0259392	0.550333	-0.0285639	6.10162	0.86164	0.524727	0.791455	73.0548	66.4406	0.136915	10.0166	1.68348e-08	5.54303e-07
Gnpda1|ENSMUSG00000052102	0.215564	3.78429	10.3843	0.00544981	0.290979	-0.413203	3.78421	43.7698	2.61106e-07	1.78665e-05	14.1923	12.4183	0.192637	4.42865	0.000730956	0.00304431
Gpatch11|ENSMUSG00000050668	-0.12788	5.30861	4.27521	0.0474405	0.659238	0.214371	5.30842	13.668	0.000877834	0.0125955	39.123	41.3075	-0.0783887	-2.11496	0.0607541	0.115025
Gpc6|ENSMUSG00000058571	0.325138	2.56417	11.5521	0.00234394	0.197896	0.172695	2.56425	3.79932	0.0824839	0.303353	4.64924	6.5641	-0.497604	-8.9091	1.10164e-07	2.30586e-06
Gpcpd1|ENSMUSG00000027346	-0.113918	7.17991	4.53152	0.041649	0.631654	-0.227681	7.17973	22.0011	5.65266e-05	0.00143404	166.333	131.81	0.335616	11.0764	3.4197e-09	1.73505e-07
Gpd1|ENSMUSG00000023019	-0.359886	5.73557	37.7521	9.53799e-07	0.00497163	-0.385277	5.73551	49.3806	8.54904e-08	7.34149e-06	72.4856	42.9534	0.754922	21.5972	8.5937e-14	1.49118e-10
Gpd2|ENSMUSG00000026827	0.14736	6.72516	13.711	0.00140731	0.158521	0.350941	6.72532	89.3702	1.77672e-10	5.00249e-08	84.1258	117.911	-0.487083	-23.2409	7.20504e-11	1.09668e-08
Gpm6b|ENSMUSG00000031342	-0.174924	10.9541	12.3592	0.00142437	0.158521	0.00640107	10.9542	0.0192661	0.89054	0.962375	2122.62	1892.34	0.165677	6.66028	7.06955e-06	6.68506e-05
Gpr1|ENSMUSG00000046856	0.629688	-0.695988	8.54408	0.0110376	0.406117	-0.691514	-0.696062	11.871	0.00275523	0.0297119	0.490138	0.488281	0.00547666	0.0337996	0.973661	0.981182
Gpr115|ENSMUSG00000023918	0.504976	0.538182	7.74327	0.00925969	0.373416	0.237679	0.538306	2.07396	0.170036	0.458815	1.02516	1.66652	-0.700995	-7.5995	9.02251e-07	1.26974e-05
Gpr126|ENSMUSG00000039116	0.281169	1.7322	5.84979	0.0347165	0.59872	0.200307	1.73213	3.5184	0.101591	0.343538	2.70412	3.77266	-0.480422	-6.91553	1.13416e-05	9.92432e-05
Gpr149|ENSMUSG00000043441	0.231592	3.39914	4.41277	0.0442286	0.640231	0.303705	3.39876	8.3557	0.0071071	0.059378	7.82137	11.9924	-0.616626	-9.93037	6.92818e-08	1.60934e-06
Gpr150|ENSMUSG00000045509	0.695558	-0.374816	7.98356	0.00833904	0.350702	-0.56378	-0.3751	6.69206	0.0148142	0.0993833	0.629826	0.702632	-0.157816	-1.31919	0.206082	0.305635
Gpr153|ENSMUSG00000042804	-0.300592	4.35228	5.84441	0.0219485	0.521742	0.418304	4.35271	12.5691	0.00131747	0.0171811	19.1824	20.8758	-0.122045	-1.98012	0.0673635	0.125029
Gpr155|ENSMUSG00000041762	-0.183597	7.92244	8.54451	0.00655345	0.30857	-0.0888089	7.92243	2.4777	0.126028	0.389501	273.99	226.18	0.276657	7.01469	3.06937e-05	0.000220903
Gpr161|ENSMUSG00000040836	0.29589	1.63128	5.54116	0.0305725	0.575172	0.185672	1.63127	2.60142	0.13485	0.404619	2.41765	3.40298	-0.493192	-6.22999	9.26274e-06	8.3712e-05
Gpr26|ENSMUSG00000040125	-0.160858	7.32117	5.47989	0.0261144	0.550333	-0.521682	7.32105	65.1832	5.43728e-09	7.78211e-07	202.467	128.072	0.660732	13.5083	7.72352e-09	3.09447e-07
Gpr6|ENSMUSG00000046922	-0.332289	6.47273	25.6889	1.94808e-05	0.0175727	0.055644	6.4728	0.82818	0.370101	0.68064	99.7192	82.442	0.274492	7.73438	1.65098e-05	0.000133806
Gpr68|ENSMUSG00000047415	-0.439952	1.33953	6.93271	0.0132766	0.451483	0.425948	1.33955	7.42844	0.0106413	0.0790654	2.6233	2.55	0.040887	0.372891	0.713907	0.788123
Gpr83|ENSMUSG00000031932	-0.117955	6.74954	5.079	0.0317247	0.582505	-0.127095	6.74956	6.93337	0.013278	0.0920778	116.908	99.0119	0.239704	7.60808	1.78431e-06	2.20837e-05
Gpr88|ENSMUSG00000068696	-0.143752	10.6057	6.4206	0.0167715	0.498773	-0.101783	10.6056	3.84758	0.0592184	0.247343	1749.07	1466.97	0.253754	8.79688	5.82564e-06	5.72978e-05
Gprin1|ENSMUSG00000069227	0.128252	4.99649	4.82024	0.0360452	0.608956	0.119942	4.99651	4.68606	0.0385469	0.188885	28.1169	33.3338	-0.245548	-5.95174	1.65794e-05	0.000134245
Gprin3|ENSMUSG00000045441	-0.165208	6.09317	6.00014	0.0203956	0.512552	-0.0402448	6.09318	0.417084	0.523338	0.79053	73.1424	63.5344	0.203171	3.86194	0.00137909	0.00509581
Greb1l|ENSMUSG00000042942	0.47684	1.72993	5.12882	0.0309602	0.577846	0.644242	1.73025	10.7286	0.00267753	0.0291054	1.83503	4.26598	-1.21708	-7.24473	1.44146e-06	1.85412e-05
Grik2|ENSMUSG00000056073	-0.11502	7.84858	4.87165	0.0351375	0.600632	0.19402	7.84881	16.0111	0.000383825	0.00654637	221.343	235.987	-0.0924268	-2.87548	0.0111479	0.0287426
Gsg1l|ENSMUSG00000046182	-0.158408	7.19872	6.69029	0.0148205	0.470385	-0.489242	7.19866	74.4722	1.32931e-09	2.65475e-07	187.711	119.393	0.65279	31.77	2.02691e-15	1.75854e-11
Gsto1|ENSMUSG00000025068	0.244886	4.23988	13.0451	0.00110218	0.1389	0.442106	4.2399	49.7555	7.95771e-08	6.88397e-06	14.1066	22.4334	-0.669276	-17.6515	7.00228e-12	2.29252e-09
Gtf2e2|ENSMUSG00000031585	-0.152786	4.12966	6.57015	0.0350572	0.600245	-0.0159375	4.12953	0.082708	0.813801	0.934101	18.9187	16.8431	0.167652	5.2549	6.93883e-05	0.000433883
H2-Ob|ENSMUSG00000041538	-1.04872	0.211684	36.7774	1.19079e-06	0.00497163	0.0193172	0.211764	0.0128837	0.918984	0.973415	1.88688	0.740012	1.35038	9.86743	4.16776e-08	1.09604e-06
H2-Q7|ENSMUSG00000060550	-0.889798	-0.24961	4.39684	0.0445878	0.641099	0.15941	-0.249513	0.139607	0.711317	0.892436	0.988923	0.657965	0.587848	2.03282	0.0679759	0.125896
H2-T10|ENSMUSG00000079491	-0.509456	1.80413	10.3325	0.00313288	0.228487	0.674995	1.80448	19.3361	0.000128379	0.00278397	3.45425	3.62858	-0.0710326	-0.564117	0.583676	0.682327
H2-T22|ENSMUSG00000056116	0.478157	4.16269	31.0502	4.71715e-06	0.00898303	0.443258	4.16285	30.7989	5.04304e-06	0.000200567	12.2318	21.8461	-0.836738	-19.5357	8.72288e-13	5.82152e-10
H2-T23|ENSMUSG00000067212	0.334159	3.18773	13.3093	0.000999819	0.134647	0.0949427	3.18783	1.24044	0.274289	0.589379	7.48963	9.91812	-0.405171	-6.33607	7.4634e-06	6.98139e-05
Has3|ENSMUSG00000031910	0.261267	2.11033	4.51514	0.0419947	0.631654	-0.135322	2.1103	1.36476	0.251975	0.56593	3.96391	4.35164	-0.134638	-1.45385	0.16721	0.259846
Hba-a1|ENSMUSG00000069919	0.425387	4.93843	5.92213	0.021158	0.520241	-0.266508	4.9384	2.67034	0.112755	0.366888	27.6022	30.6287	-0.150101	-1.44833	0.165727	0.257921
Hba-a2|ENSMUSG00000069917	0.401092	4.73514	4.95406	0.0337348	0.596752	-0.248325	4.73512	2.18893	0.149499	0.427334	24.1624	26.7068	-0.144448	-1.32902	0.201438	0.300468
Hebp1|ENSMUSG00000042770	-0.148862	4.83424	5.4345	0.0266912	0.553339	-0.170273	4.83425	8.18699	0.007641	0.0624589	32.3164	26.0099	0.313206	8.72706	1.74275e-07	3.34515e-06
Hebp2|ENSMUSG00000019853	-0.386429	0.70923	6.09686	0.029244	0.568269	0.221051	0.709293	2.25533	0.183429	0.478928	1.88684	1.71727	0.135855	1.48772	0.160399	0.251217
Hecw2|ENSMUSG00000042807	-0.122694	6.55197	8.53268	0.00805718	0.341417	-0.048768	6.55193	1.60034	0.259593	0.573295	100.834	89.457	0.172712	5.69847	0.000183346	0.0009719
Helz|ENSMUSG00000020721	0.167276	4.94242	5.60766	0.0245629	0.543323	-0.0941704	4.94242	2.0337	0.164237	0.449651	28.9637	30.5832	-0.0784921	-2.10849	0.0537657	0.104251
Hey1|ENSMUSG00000040289	-0.21093	6.22481	6.83603	0.0138703	0.457799	0.0678298	6.22489	0.806315	0.376409	0.685171	80.4695	72.9703	0.141132	3.01445	0.00852812	0.0230343
Hgf|ENSMUSG00000028864	0.357003	1.78694	10.9865	0.00662034	0.310866	-0.0992957	1.78685	0.996997	0.414204	0.71411	2.92876	3.47925	-0.248485	-4.07818	0.000784534	0.00321446
Hiatl1|ENSMUSG00000038212	-0.105234	6.12188	10.3352	0.0287579	0.563902	0.084064	6.12181	7.82791	0.0618913	0.253816	70.8728	70.0648	0.0165425	0.941371	0.360143	0.475116
Hic2|ENSMUSG00000050240	-0.200552	2.94929	5.18784	0.0344427	0.597761	0.0193417	2.9493	0.0554808	0.82644	0.939066	8.37772	7.41506	0.176099	3.39099	0.00595332	0.0171541
Hipk2|ENSMUSG00000061436	0.13517	6.86635	4.7666	0.0370198	0.612374	-0.0664673	6.86647	1.36332	0.25222	0.566036	110.956	118.266	-0.0920458	-2.66824	0.0168618	0.0403295
Hivep2|ENSMUSG00000015501	0.0877314	8.11203	4.61596	0.0491594	0.669366	-0.124592	8.11206	10.4242	0.00302215	0.0318243	280.929	273.609	0.0380902	1.32045	0.209123	0.309246
Hmgcl|ENSMUSG00000028672	-0.180676	4.5712	9.78437	0.00623209	0.30456	0.136427	4.57122	6.22632	0.0272077	0.150158	24.9441	24.1965	0.0438977	1.1664	0.262195	0.370007
Hmgn1|ENSMUSG00000040681	-0.129561	6.02687	7.4779	0.0104063	0.396341	0.0793949	6.02692	3.24946	0.0815684	0.301262	67.652	65.4847	0.0469754	2.12615	0.0485468	0.0959294
Hmgn2|ENSMUSG00000003038	-0.175184	5.58175	7.96404	0.00840998	0.350702	0.133408	5.58175	5.33866	0.0279631	0.152832	48.2432	46.8998	0.0407447	1.03882	0.313854	0.426368
Hnrnpll|ENSMUSG00000024095	-0.101698	6.50372	5.48026	0.0280239	0.56264	-0.0546272	6.50365	1.84684	0.20709	0.511469	97.2623	87.0708	0.159691	5.62573	7.74274e-05	0.00047357
Homer1|ENSMUSG00000007617	-0.329682	8.48674	23.4104	3.72232e-05	0.0252044	0.0256559	8.48695	0.158702	0.693194	0.882878	404.685	333.272	0.280101	5.5	3.90933e-05	0.00027015
Hook2|ENSMUSG00000052566	0.204963	2.60429	5.15557	0.0457352	0.650099	-0.0741978	2.60419	0.736018	0.444747	0.738594	5.58488	6.19643	-0.14991	-2.76782	0.0199051	0.0462178
Hpca|ENSMUSG00000028785	-0.20872	10.8336	10.5151	0.0029123	0.22184	-0.00409947	10.8337	0.00475517	0.945484	0.982821	2007.57	1734.73	0.21074	6.42265	4.07878e-05	0.000279081
Hpx|ENSMUSG00000030895	0.762511	-1.23912	5.04197	0.0323062	0.583701	-0.204636	-1.23911	0.436965	0.513669	0.7848	0.270036	0.41441	-0.617905	-3.30706	0.00466316	0.0139437
Hras|ENSMUSG00000025499	-0.168509	7.35759	10.822	0.00257834	0.207466	-0.0157358	7.35771	0.110043	0.742417	0.905162	177.827	157.333	0.17665	7.83932	6.61175e-06	6.33501e-05
Hrk|ENSMUSG00000046607	-0.296696	5.99354	16.8707	0.000286347	0.071126	-0.334676	5.99355	24.9937	2.37241e-05	0.000719897	80.672	52.6178	0.616516	24.0768	2.32285e-13	2.84355e-10
Hspa2|ENSMUSG00000059970	0.181268	4.68635	15.4669	0.0045883	0.275926	0.0427599	4.68628	1.00741	0.475337	0.758679	23.3029	27.1841	-0.222252	-10.791	1.14683e-08	4.14578e-07
Htr1b|ENSMUSG00000049511	-0.138661	6.64055	6.5524	0.0157852	0.490598	-0.108905	6.6407	4.43363	0.0437716	0.205616	111.963	92.9031	0.26922	4.91456	0.0008114	0.0033027
Htr2a|ENSMUSG00000034997	0.522118	3.71894	18.3517	0.000175689	0.0568138	0.316734	3.71874	7.42802	0.0106433	0.0790654	8.39206	16.3053	-0.958246	-16.6345	8.06221e-12	2.45431e-09
Htr2c|ENSMUSG00000041380	0.248711	6.27747	15.4947	0.000458031	0.0922147	-0.430736	6.27697	49.7433	7.97619e-08	6.88397e-06	78.8157	71.3275	0.144024	3.49012	0.00424864	0.0129055
Htr4|ENSMUSG00000026322	-0.447823	2.42965	15.6214	0.000438345	0.0905156	0.317713	2.4298	8.96979	0.00547963	0.0492995	5.61976	5.13876	0.129089	1.52245	0.148607	0.236789
Hvcn1|ENSMUSG00000064267	-0.272851	3.8844	8.95344	0.00551403	0.292585	0.789644	3.88485	89.4888	1.75031e-10	5.00249e-08	11.6252	16.712	-0.52363	-8.82868	2.45906e-07	4.3944e-06
Iah1|ENSMUSG00000062054	-0.163617	3.47688	6.3426	0.048685	0.668064	-0.147562	3.4768	5.83498	0.0573848	0.243174	12.837	10.3444	0.311453	10.4704	5.54668e-08	1.35367e-06
Id3|ENSMUSG00000007872	-0.208054	4.54516	5.29678	0.0285286	0.56264	-0.018031	4.54505	0.045124	0.833222	0.942059	25.937	22.4892	0.205779	4.54783	0.000404186	0.00188939
Id4|ENSMUSG00000021379	-0.193095	7.23646	4.78456	0.0366901	0.611985	-0.0887454	7.23649	1.15553	0.29102	0.60519	167.021	136.222	0.294071	5.2079	7.27841e-05	0.000451215
Ido1|ENSMUSG00000031551	-0.20788	5.08686	8.70308	0.00612719	0.30456	0.316112	5.08708	24.5119	2.71875e-05	0.000798197	32.7319	35.2459	-0.106758	-2.60039	0.0195115	0.0455242
Ido2|ENSMUSG00000031549	0.365584	1.02602	6.24366	0.025945	0.550333	0.302922	1.02616	5.05134	0.0451614	0.209691	1.50811	2.30515	-0.612116	-6.35666	1.2789e-05	0.000108979
Ids|ENSMUSG00000035847	0.125623	9.23152	15.9784	0.00563712	0.296364	-0.107767	9.23141	13.1355	0.0116415	0.084151	586.791	594.858	-0.0196999	-1.03062	0.317498	0.43014
Ift57|ENSMUSG00000032965	-0.106952	5.59344	6.31215	0.0401286	0.62067	0.110546	5.59335	7.98261	0.0226967	0.132817	48.949	49.0786	-0.00381472	-0.132973	0.896726	0.927792
Igfbp6|ENSMUSG00000023046	-0.219289	3.7167	6.42383	0.0167466	0.498773	0.393762	3.71695	23.1597	4.01379e-05	0.00108914	11.9945	13.5817	-0.179293	-4.42661	0.000386859	0.00182165
Ighmbp2|ENSMUSG00000024831	0.173554	3.4538	5.9491	0.0366084	0.611985	-0.146625	3.45374	4.94716	0.0564365	0.240819	10.5143	10.714	-0.0271523	-0.601977	0.555548	0.658956
Igsf5|ENSMUSG00000000159	-0.239979	8.48948	9.26543	0.00484113	0.283245	-0.119407	8.48951	2.77541	0.1062	0.353554	418.348	327.321	0.353996	6.6726	5.17492e-05	0.000338978
Il11ra1|ENSMUSG00000073889	-0.148466	4.01627	7.36598	0.0466502	0.65612	0.101759	4.01637	3.92805	0.143893	0.419254	16.6518	16.1466	0.0444531	1.49952	0.154062	0.243846
Il17rb|ENSMUSG00000015966	0.304111	1.3628	5.92851	0.0380744	0.614628	0.217192	1.36284	3.46482	0.110875	0.363319	2.00989	2.90214	-0.530003	-6.73571	3.51112e-06	3.80068e-05
Il1a|ENSMUSG00000027399	-0.535877	-0.0813156	6.2715	0.0179691	0.504255	0.460929	-0.0812459	5.47649	0.0261645	0.146422	1.05223	1.00704	0.0633307	0.540304	0.595997	0.692705
Il2rb|ENSMUSG00000068227	-0.634835	1.39256	14.5733	0.00063311	0.111017	1.16929	1.39311	57.3701	1.99152e-08	2.26519e-06	2.15982	3.07399	-0.509199	-5.89197	1.78167e-05	0.000142141
Ildr2|ENSMUSG00000040612	0.342919	5.91527	36.0505	1.40823e-06	0.00497163	0.227551	5.9152	17.91	0.000203213	0.00398423	45.0955	68.3362	-0.599666	-11.8751	2.79813e-09	1.51256e-07
Ina|ENSMUSG00000034336	-0.125161	7.11935	5.32922	0.0280837	0.56264	0.093479	7.11946	3.37471	0.0761948	0.289129	141.143	138.505	0.0272153	0.838729	0.414979	0.528842
Inpp5f|ENSMUSG00000042105	-0.229734	8.01093	6.90141	0.0134657	0.452527	0.0300312	8.01078	0.134272	0.716632	0.894497	286.036	248.297	0.204133	3.19578	0.0072256	0.0200812
Inpp5j|ENSMUSG00000034570	-0.304649	6.13159	31.1527	4.59695e-06	0.00898303	-0.127481	6.1317	6.05697	0.0198658	0.121904	84.8573	63.2201	0.424656	12.1433	8.6432e-10	6.32814e-08
Intu|ENSMUSG00000060798	0.250742	3.81784	18.8832	0.00141031	0.158521	0.274283	3.81785	26.7032	0.000167911	0.0034169	10.9227	15.7899	-0.531676	-18.368	1.31558e-12	7.87169e-10
Ippk|ENSMUSG00000021385	-0.135124	5.09708	6.80873	0.0197943	0.509232	-0.200177	5.0971	17.1092	0.000264784	0.00488471	39.8038	31.2087	0.350958	12.2504	8.7611e-10	6.3875e-08
Iqcd|ENSMUSG00000029601	0.450743	-0.184902	4.85457	0.0409857	0.624959	0.00837402	-0.184887	0.00210459	0.965954	0.99067	0.71326	0.926163	-0.376838	-3.15608	0.00679024	0.0190716
Irgq|ENSMUSG00000041037	0.0977219	6.47675	8.19168	0.0351499	0.600632	-0.0539389	6.47676	2.80386	0.213174	0.518516	87.4079	90.1352	-0.0443272	-2.50906	0.0283855	0.0616297
Islr2|ENSMUSG00000051243	0.292482	5.21117	7.03398	0.0126842	0.440018	0.0525305	5.21079	0.265877	0.609915	0.839074	31.6646	40.6088	-0.358921	-5.8034	5.21837e-05	0.00034118
Itga5|ENSMUSG00000000555	-0.298603	5.19756	9.31144	0.00474964	0.281955	0.155838	5.19788	2.85943	0.101273	0.342787	39.3419	35.8615	0.133632	2.85889	0.0134921	0.0336613
Itgal|ENSMUSG00000030830	0.850541	-0.907243	7.57949	0.00995008	0.390239	0.119734	-0.907092	0.178606	0.675607	0.873486	0.266683	0.534162	-1.00215	-3.83037	0.00191813	0.00665669
Itgav|ENSMUSG00000027087	0.0904051	7.10271	5.47941	0.0445568	0.641099	0.00464833	7.1026	0.0161188	0.912652	0.971155	130.475	140.176	-0.103458	-4.57856	0.000302842	0.00147197
Itgb1bp1|ENSMUSG00000062352	-0.11723	5.92681	13.187	0.0174383	0.500628	0.0277618	5.92684	0.830405	0.545858	0.802187	63.3729	59.6387	0.0876161	5.39486	5.92614e-05	0.000380712
Itgb7|ENSMUSG00000001281	-0.616883	-0.810214	6.98375	0.0181449	0.505667	1.1187	-0.810056	24.9239	2.41947e-05	0.000731592	0.459442	0.64087	-0.480148	-3.88669	0.00120526	0.00456153
Itpka|ENSMUSG00000027296	-0.176367	6.89656	11.6617	0.00185832	0.181926	-0.201841	6.89662	17.303	0.000248245	0.00465968	137.936	106.735	0.369966	17.5978	2.35742e-10	2.6073e-08
Jhdm1d|ENSMUSG00000042599	-0.0973605	7.22995	5.12976	0.030946	0.577846	0.0149856	7.22998	0.138665	0.721613	0.896406	155.378	147.728	0.0728376	2.00035	0.0649946	0.121333
Jun|ENSMUSG00000052684	-0.257851	4.31983	6.81184	0.0140233	0.457799	0.0151217	4.3199	0.0267493	0.871188	0.956724	21.7015	18.3319	0.243434	3.24889	0.00839669	0.0227336
Kbtbd8|ENSMUSG00000030031	-0.170114	3.59222	5.41131	0.0370947	0.612374	0.0630241	3.59216	0.854474	0.407476	0.709778	12.6026	11.7352	0.102884	2.64875	0.0180575	0.0426943
Kcnab1|ENSMUSG00000027827	-0.23816	8.6129	13.1518	0.00105955	0.137573	-0.114025	8.61287	3.58423	0.0680765	0.270706	453.987	353.208	0.362131	10.1309	3.57645e-07	5.95e-06
Kcng1|ENSMUSG00000074575	0.30315	5.75776	12.1192	0.00155994	0.161932	0.380068	5.75777	21.6019	6.37282e-05	0.00158398	40.735	66.469	-0.706415	-10.9679	4.03072e-09	1.91619e-07
Kcnh3|ENSMUSG00000037579	-0.134795	6.93175	8.33165	0.00717683	0.323897	-0.0606786	6.93193	1.87702	0.180906	0.475741	131.188	115.513	0.183578	7.09499	2.10396e-06	2.523e-05
Kcnh4|ENSMUSG00000035355	-0.237467	5.5071	5.85925	0.0217951	0.521742	-0.143865	5.50722	2.41546	0.130699	0.397569	53.8013	41.4064	0.377789	7.16926	3.70891e-05	0.000258774
Kcnh8|ENSMUSG00000035580	0.548833	-0.332183	8.29769	0.016424	0.498337	-0.201018	-0.332261	1.40313	0.32336	0.637067	0.640168	0.808188	-0.336239	-2.674	0.016486	0.0395937
Kcnj3|ENSMUSG00000026824	0.211476	4.97114	15.3927	0.000495991	0.0962497	0.537417	4.97115	117.924	7.03148e-12	4.16434e-09	22.4315	37.6001	-0.745209	-16.7506	1.67597e-11	3.82651e-09
Kcnj4|ENSMUSG00000044216	-0.174154	7.65057	8.47599	0.00674746	0.314252	0.00032593	7.65064	3.37317e-05	0.995405	0.998544	216.519	191.563	0.176675	5.33536	0.000101037	0.000594013
Kcnj9|ENSMUSG00000038026	0.137287	5.04663	7.33786	0.020149	0.509232	-0.0409133	5.04665	0.756308	0.456903	0.745787	30.6093	33.2557	-0.119632	-3.01033	0.0094786	0.0250865
Kcnk1|ENSMUSG00000033998	-0.101525	6.81827	6.34322	0.0260292	0.550333	-0.0328479	6.81828	0.790505	0.441279	0.736609	121.616	110.919	0.132822	4.47158	0.00120614	0.00456153
Kcnk2|ENSMUSG00000037624	-0.141351	7.45826	5.58244	0.0248609	0.544738	-0.0170469	7.45833	0.0968536	0.757805	0.910977	192.337	172.01	0.161143	4.80458	0.000938301	0.00372401
Kcnk5|ENSMUSG00000023243	0.681691	-0.325696	7.54615	0.0100974	0.390595	-0.0764159	-0.325635	0.114861	0.737053	0.902559	0.535904	0.833938	-0.637965	-3.54612	0.00357935	0.0111787
Kcnrg|ENSMUSG00000046168	0.958561	-2.40501	4.78065	0.0367617	0.611985	0.214349	-2.40508	0.332623	0.56845	0.816508	0.0728508	0.185356	-1.34728	-4.26062	0.000931467	0.00370367
Kcns2|ENSMUSG00000050963	-0.193417	5.6326	7.2018	0.011765	0.422726	0.0121886	5.63254	0.0338634	0.855244	0.950979	53.8609	47.9915	0.166458	3.4834	0.00321839	0.0102346
Kcnt1|ENSMUSG00000058740	-0.12757	7.38598	10.1232	0.00434495	0.270077	-0.260347	7.38596	47.3885	1.25864e-07	9.90359e-06	196.557	151.675	0.373965	13.2069	7.70672e-08	1.75495e-06
Kcnt2|ENSMUSG00000052726	0.205698	4.34393	6.77431	0.0142643	0.461174	0.558364	4.34408	58.723	1.57742e-08	1.85563e-06	14.5623	24.2901	-0.738127	-16.9733	9.55229e-12	2.63097e-09
Kcnv1|ENSMUSG00000022342	0.135801	6.21526	8.58315	0.00644669	0.307016	-0.0456651	6.21522	1.10449	0.30173	0.616269	70.2388	75.1376	-0.0972655	-2.71321	0.0186818	0.0438715
Kctd1|ENSMUSG00000036225	-0.142137	6.93009	11.0792	0.00233026	0.197714	0.0385677	6.93021	0.890894	0.365451	0.676942	127.309	118.763	0.10025	3.98026	0.000972678	0.00382893
Kdm3a|ENSMUSG00000053470	-0.178673	6.89543	13.3366	0.000989831	0.134641	-0.0203436	6.89548	0.1951	0.661894	0.866201	129.5	112.263	0.206069	8.04255	5.7227e-07	8.77212e-06
Kdm4b|ENSMUSG00000024201	-0.136803	6.7153	9.61898	0.00418408	0.26885	-0.23441	6.71539	31.3414	4.39911e-06	0.000180439	123.086	95.3784	0.367936	10.858	9.99163e-07	1.36839e-05
Khdrbs1|ENSMUSG00000028790	-0.104524	7.33956	10.3118	0.0198231	0.509232	0.0265745	7.33949	0.758732	0.529039	0.792865	168.316	159.382	0.0786824	6.08137	1.43556e-05	0.000119529
Khdrbs2|ENSMUSG00000026058	0.186633	3.10158	4.60702	0.0400959	0.62067	0.0190557	3.10143	0.0561835	0.81983	0.936707	7.56856	8.79299	-0.216334	-4.41656	0.000387278	0.00182214
Kif17|ENSMUSG00000028758	-0.134114	5.65531	6.08377	0.0196116	0.509232	-0.106173	5.65541	4.27228	0.0475209	0.216262	55.368	46.8491	0.24103	7.3867	1.06994e-06	1.44821e-05
Kif5a|ENSMUSG00000074657	0.0988263	11.9998	5.06394	0.0387162	0.615196	0.0193891	11.9999	0.223917	0.666815	0.869265	3848.85	4196.33	-0.124699	-4.31405	0.000993106	0.00389256
Kif7|ENSMUSG00000050382	0.289237	1.85223	5.62104	0.0288219	0.563902	0.733888	1.85248	42.8145	3.18537e-07	2.08812e-05	2.19457	4.49823	-1.03542	-13.9778	3.53971e-10	3.39557e-08
Klf11|ENSMUSG00000020653	-0.232729	3.05392	8.4048	0.0120469	0.42821	0.159223	3.05394	4.51446	0.0674946	0.269085	8.54018	8.10298	0.0758144	1.46334	0.162501	0.253914
Klhl1|ENSMUSG00000022076	0.187371	4.33999	4.90584	0.0345479	0.597761	0.0935718	4.33979	1.50603	0.229351	0.538276	18.2547	22.2722	-0.286977	-6.64558	6.83948e-06	6.49938e-05
Klhl2|ENSMUSG00000031605	-0.152391	8.58846	13.9502	0.000791528	0.124459	-0.0529734	8.58839	1.98368	0.207681	0.512163	420.737	364.758	0.205978	12.1179	2.50471e-09	1.41569e-07
Klhl26|ENSMUSG00000055707	0.114765	5.10335	7.34061	0.0482522	0.663187	0.0496188	5.1034	1.56046	0.36146	0.673839	31.453	35.2619	-0.16491	-5.92632	3.76357e-05	0.000261472
Klhl35|ENSMUSG00000035298	0.674145	-0.592678	5.39289	0.0272322	0.559727	-1.1295	-0.592947	18.6853	0.000158022	0.00325034	0.688486	0.49976	0.462194	2.64259	0.0171815	0.0409244
Klhl5|ENSMUSG00000054920	0.0950221	6.07209	9.67148	0.0498417	0.66942	0.105778	6.07214	14.3446	0.0195654	0.120616	61.4748	70.5552	-0.198757	-12.314	6.81769e-10	5.40185e-08
Krt9|ENSMUSG00000051617	-0.587814	5.34379	16.0201	0.000382104	0.0808504	-0.255675	5.34415	3.40563	0.0749308	0.286495	53.4163	31.3855	0.76718	9.06762	8.78666e-08	1.9324e-06
l7Rn6|ENSMUSG00000062797	-0.123413	4.96281	5.11221	0.039751	0.619357	0.0992687	4.96278	3.81931	0.0770995	0.291222	31.9299	31.4267	0.0229179	0.668911	0.515083	0.623533
Lama3|ENSMUSG00000024421	0.245323	2.92688	6.37262	0.0171471	0.500628	-0.369716	2.92703	16.2119	0.000358359	0.00619196	7.70103	7.22254	0.092544	1.4911	0.160336	0.251165
Lamb3|ENSMUSG00000026639	0.314645	1.59494	4.31933	0.046383	0.654825	-0.214191	1.59503	2.34431	0.136288	0.406888	2.57828	2.74803	-0.0919858	-0.833421	0.416308	0.530185
Lamc2|ENSMUSG00000026479	0.382936	2.18968	7.22055	0.0116669	0.42008	0.629954	2.18963	22.489	4.88875e-05	0.00127026	2.83949	5.87198	-1.04822	-9.78314	6.50227e-08	1.52264e-06
Lamp5|ENSMUSG00000027270	0.169747	6.5552	11.5847	0.00191439	0.182802	-0.228779	6.55499	24.7856	2.51581e-05	0.000752609	95.785	91.9387	0.0591276	1.46455	0.170912	0.264343
Lancl2|ENSMUSG00000062190	0.133494	5.22013	6.74173	0.0179765	0.504255	-0.0522286	5.21996	1.20203	0.31975	0.633654	35.7954	38.027	-0.0872472	-3.16298	0.00587997	0.0169822
Lca5|ENSMUSG00000032258	0.198637	4.11597	10.7855	0.00698182	0.319097	0.183828	4.11597	10.747	0.00778606	0.0632273	14.4485	18.9134	-0.388487	-11.7053	2.56108e-09	1.42935e-07
Lcat|ENSMUSG00000035237	-0.182091	3.55505	6.84351	0.0264428	0.553339	0.0471426	3.55518	0.530747	0.540419	0.799274	12.9136	11.7174	0.140236	4.91529	0.000342106	0.00163884
Lgals1|ENSMUSG00000068220	-0.302197	1.59245	7.27909	0.0304172	0.575172	0.173601	1.59232	2.78433	0.182856	0.478299	3.31255	3.10113	0.0951507	1.43688	0.16929	0.262232
Limd2|ENSMUSG00000040699	-0.122538	5.85102	9.13049	0.0142009	0.461174	0.0975223	5.8511	6.5938	0.035985	0.180608	58.8354	57.8909	0.0233477	1.18937	0.25079	0.357019
Limk2|ENSMUSG00000020451	0.126086	6.60917	19.0548	0.00609677	0.30456	0.0743554	6.60924	7.43757	0.0837405	0.306139	89.4398	102.687	-0.19926	-12.32	9.77189e-10	6.94914e-08
Lin7b|ENSMUSG00000003872	-0.132758	4.94149	5.00423	0.0329113	0.587569	-0.118971	4.94146	4.63576	0.0395301	0.191781	34.5564	29.1539	0.245264	6.60168	6.79532e-05	0.000427064
Lman2l|ENSMUSG00000001143	0.13109	5.69165	8.34431	0.0106666	0.399839	0.204825	5.69176	23.5041	3.63104e-05	0.00100375	44.1941	56.4167	-0.352268	-14.5864	5.30611e-11	8.76872e-09
Lmbr1l|ENSMUSG00000022999	0.187899	2.9251	7.53982	0.0481288	0.662911	0.098724	2.92512	2.4214	0.268458	0.583125	6.63304	8.13467	-0.294414	-7.47506	8.82996e-06	8.04713e-05
Lor|ENSMUSG00000043165	0.393315	0.445935	4.22935	0.0491694	0.669366	0.656078	0.446114	14.4757	0.000656269	0.00996227	0.872648	1.62216	-0.894449	-6.57475	4.93166e-06	4.99601e-05
Lpar2|ENSMUSG00000031861	-0.593729	-0.167759	6.18695	0.0186895	0.508495	0.785827	-0.167678	13.055	0.00109932	0.0150058	0.839591	0.954291	-0.184741	-1.27522	0.227069	0.329992
Lpcat4|ENSMUSG00000027134	-0.189182	6.74253	8.32861	0.00718618	0.323897	-0.190544	6.74255	9.65589	0.00412399	0.040062	126.62	97.8438	0.371948	13.6998	1.22364e-09	8.19443e-08
Lpl|ENSMUSG00000015568	0.10686	6.74001	5.15791	0.0305232	0.575172	-0.0546148	6.73986	1.59079	0.216997	0.522857	104.916	108.786	-0.0522589	-1.25527	0.230795	0.33437
Lrfn1|ENSMUSG00000030600	0.217741	3.18176	5.20711	0.0297995	0.573858	0.0265749	3.18192	0.0896367	0.766718	0.913953	8.18665	9.5744	-0.225908	-3.60151	0.00220875	0.00747189
Lrp1b|ENSMUSG00000049252	0.091394	6.99127	4.5835	0.0423236	0.632562	-0.088912	6.99116	4.8454	0.035606	0.179591	124.616	125.977	-0.0156691	-0.623847	0.545525	0.650402
Lrp2bp|ENSMUSG00000031637	0.476546	0.00334318	7.35031	0.0226285	0.528379	-0.071785	0.00292663	0.200801	0.709659	0.891747	0.800634	1.06524	-0.411961	-5.11263	9.01536e-05	0.000538872
Lrrc10b|ENSMUSG00000090291	-0.297837	8.24938	12.4491	0.0013769	0.158521	-0.196867	8.2495	6.46214	0.0164595	0.107284	370.635	267.585	0.47	9.16519	2.82376e-06	3.20667e-05
Lrrc48|ENSMUSG00000056598	0.180368	3.11547	7.54587	0.0479692	0.662485	-0.0610142	3.11529	1.0323	0.464188	0.750135	8.12643	8.82325	-0.118688	-2.97938	0.00851816	0.0230158
Lrrc55|ENSMUSG00000075224	0.269618	3.92116	12.8567	0.00118205	0.145749	0.506888	3.92124	52.3875	4.8574e-08	4.5095e-06	10.2253	17.8302	-0.802187	-17.1559	2.96603e-09	1.5691e-07
Lrrc9|ENSMUSG00000021090	0.178459	3.87381	8.75642	0.0234873	0.532473	0.687372	3.8741	158.694	1.81594e-13	2.39914e-10	9.96056	18.2779	-0.875805	-27.1994	2.94974e-13	2.84355e-10
Lrriq1|ENSMUSG00000019892	0.484268	0.958225	9.0854	0.00521783	0.287551	0.340373	0.958074	5.56598	0.0250648	0.142258	1.23477	2.27633	-0.882474	-9.19904	2.82061e-07	4.90094e-06
Lrrk2|ENSMUSG00000036273	-0.15386	7.88473	10.3325	0.00313285	0.228487	0.171163	7.88494	14.3658	0.000682531	0.010238	235.825	243.534	-0.046405	-1.55676	0.140265	0.225903
Lrrn3|ENSMUSG00000036295	0.321416	5.82583	12.5259	0.00133771	0.157035	-0.0415999	5.82557	0.238438	0.62891	0.849472	48.2746	59.9751	-0.3131	-5.80559	0.000106197	0.000618779
Lrrtm4|ENSMUSG00000052581	0.22275	5.65419	26.7068	1.47212e-05	0.015595	0.0708806	5.65406	2.86564	0.138106	0.410118	43.5148	54.0302	-0.312259	-13.2476	4.52132e-10	4.00275e-08
Lrtm2|ENSMUSG00000055003	-0.152238	6.88722	4.58308	0.0405812	0.623461	-0.192455	6.88711	8.68127	0.00618751	0.0536076	139.947	110.066	0.346504	9.70019	1.8064e-07	3.43469e-06
Lss|ENSMUSG00000033105	0.162752	4.22196	6.88731	0.0215625	0.521742	-0.132217	4.22203	5.13674	0.0474769	0.216176	17.6869	18.2126	-0.0422544	-1.31335	0.214557	0.315588
Lurap1|ENSMUSG00000028701	0.133968	4.99046	8.90126	0.0254376	0.548041	0.130822	4.9905	10.0862	0.0195562	0.120602	28.0506	33.6751	-0.263649	-12.6885	4.28939e-10	3.87654e-08
Ly6e|ENSMUSG00000022587	0.120188	5.75885	5.75813	0.0228641	0.529746	0.233457	5.75896	25.2127	2.23083e-05	0.000684186	46.5509	59.2502	-0.348011	-14.1507	8.03772e-09	3.18426e-07
Ly6h|ENSMUSG00000022577	0.166964	6.18319	7.41358	0.0107068	0.399839	0.399813	6.18336	49.0317	9.14162e-08	7.73435e-06	56.8133	81.8468	-0.526696	-12.9944	1.37045e-09	8.84015e-08
Lynx1|ENSMUSG00000022594	-0.17082	8.66005	5.94776	0.0209041	0.517309	0.170986	8.66034	6.95102	0.0131726	0.0917474	406.778	409.892	-0.0110026	-0.306601	0.764346	0.829037
Lypd6b|ENSMUSG00000026765	0.291735	2.17305	4.93328	0.0340827	0.597761	-0.0129672	2.17297	0.0113369	0.915919	0.972484	3.62494	4.96051	-0.452533	-3.37468	0.00543242	0.0158421
Lzts3|ENSMUSG00000037703	-0.115911	8.80366	10.943	0.0103059	0.394329	-0.239213	8.80365	50.152	7.37952e-08	6.43367e-06	517.835	402.914	0.362018	21.4647	9.91335e-14	1.56379e-10
Maats1|ENSMUSG00000022805	0.471076	0.156648	5.34029	0.0279335	0.56264	-0.0690611	0.156035	0.15063	0.700692	0.886893	0.833435	1.2437	-0.577503	-3.27016	0.00519057	0.0152552
Macrod1|ENSMUSG00000036278	0.360077	2.07675	11.0863	0.00306809	0.228487	0.256854	2.07664	6.59693	0.0221891	0.131025	3.22815	4.94533	-0.61536	-7.88791	4.59121e-07	7.32904e-06
Macrod2|ENSMUSG00000068205	-0.137054	6.37037	12.4081	0.00355105	0.24399	-0.159134	6.37027	19.6819	0.000268836	0.00494353	93.1018	75.785	0.296897	12.3833	1.80919e-07	3.43469e-06
Mafa|ENSMUSG00000047591	-0.944265	-0.873294	5.39062	0.0272621	0.559727	-2.29936	-0.873636	33.6374	2.50167e-06	0.000114577	1.27235	0.102916	3.62796	22.15	2.36629e-13	2.84355e-10
Magi1|ENSMUSG00000045095	0.104226	5.95124	6.48213	0.0344306	0.597761	0.151271	5.95121	15.8611	0.00102139	0.0141783	54.9957	65.9351	-0.261728	-13.0055	4.27487e-10	3.87654e-08
Malat1|ENSMUSG00000092341	-0.279079	9.63586	7.12027	0.0122022	0.430315	0.102052	9.63617	1.03728	0.316653	0.63026	866.321	771.756	0.166758	2.45463	0.025584	0.0566604
Map3k11|ENSMUSG00000004054	-0.141605	4.85358	9.18898	0.0217519	0.521742	-0.113756	4.85371	6.60076	0.04916	0.221201	32.3315	27.1972	0.249485	8.43264	3.53297e-07	5.88897e-06
Map3k7cl|ENSMUSG00000025610	-0.698098	-1.3911	6.36527	0.0172055	0.500628	0.518298	-1.39103	3.9886	0.0586052	0.245678	0.414997	0.362575	0.194822	1.19968	0.254581	0.361319
Map3k9|ENSMUSG00000042724	0.134343	5.08443	6.76648	0.0208821	0.517309	0.0789641	5.08453	2.59819	0.148344	0.426197	30.757	35.5989	-0.210919	-5.73417	4.49399e-05	0.0003023
Map4k4|ENSMUSG00000026074	0.123739	7.1686	11.0746	0.00577701	0.299466	-0.0270368	7.16866	0.604883	0.522778	0.790164	136.274	146.017	-0.0996259	-4.9163	0.000148335	0.000817372
Marcks|ENSMUSG00000069662	0.179923	7.45598	11.5756	0.00192109	0.182802	-0.0645705	7.45577	1.70442	0.201699	0.505204	164.235	179.008	-0.124261	-3.48947	0.00352781	0.0110396
Marveld3|ENSMUSG00000001672	-0.453223	0.321275	6.79146	0.0182709	0.506829	0.10751	0.32137	0.448701	0.549029	0.803404	1.48797	1.16775	0.349619	5.46307	4.48982e-05	0.0003023
Mas1|ENSMUSG00000068037	-0.460777	2.37755	5.93111	0.0210686	0.51956	-1.06259	2.37717	35.5027	1.60632e-06	7.77142e-05	8.313	3.02598	1.45797	11.8405	1.23261e-07	2.50447e-06
Mast2|ENSMUSG00000003810	0.111353	6.50775	7.4904	0.0167055	0.498773	0.213762	6.50801	31.4903	4.23814e-06	0.000175822	77.9205	97.7134	-0.326554	-13.2536	3.12621e-09	1.62413e-07
Mb21d1|ENSMUSG00000032344	0.496331	0.0569224	7.84664	0.0164571	0.498337	-0.118744	0.0568662	0.530586	0.533999	0.794821	0.786173	1.06363	-0.436081	-3.94154	0.00107172	0.00415008
Mbtps1|ENSMUSG00000031835	-0.110397	7.14759	9.42797	0.0138967	0.457799	-0.264571	7.14747	66.7414	4.25225e-09	6.35065e-07	165.311	127.392	0.375911	15.4596	3.60616e-09	1.78783e-07
Mcf2|ENSMUSG00000031139	-0.239775	2.7807	7.62621	0.0139988	0.457799	0.0713557	2.78063	0.765594	0.439551	0.735036	7.58443	6.67892	0.183425	3.5384	0.00253052	0.00838609
Mdh1b|ENSMUSG00000025963	0.471912	-0.0750352	6.58176	0.0289439	0.564358	0.174131	-0.0749828	1.1217	0.366196	0.677302	0.658417	1.01701	-0.627259	-4.95237	0.000148388	0.000817408
Me1|ENSMUSG00000032418	-0.132042	4.70008	4.49894	0.0423396	0.632562	0.107505	4.70018	3.32431	0.0783076	0.293525	26.5517	26.1926	0.0196442	0.442381	0.667555	0.752133
Me3|ENSMUSG00000030621	-0.119576	6.06296	7.57983	0.0133595	0.452507	-0.406438	6.0627	102.198	3.81618e-11	1.39453e-08	82.9769	57.6952	0.524257	16.7982	2.79487e-09	1.51256e-07
Mef2c|ENSMUSG00000005583	0.162829	6.39048	11.3655	0.002084	0.192308	-0.12939	6.39022	8.43269	0.00687701	0.0578984	78.6783	81.8248	-0.0565738	-2.52723	0.0217192	0.0495884
Meis2|ENSMUSG00000027210	-0.134514	9.13528	13.3104	0.00317309	0.230138	-0.0755945	9.13527	4.82428	0.0773244	0.291494	615.076	531.069	0.211867	11.4519	2.05671e-09	1.20568e-07
Melk|ENSMUSG00000035683	-0.275728	1.8288	4.62892	0.0396575	0.618556	-0.0969879	1.8288	0.654355	0.424971	0.723448	3.94898	3.0253	0.384402	4.36554	0.000699485	0.00293957
Metazoa_SRP|ENSMUSG00000099021	-2.87674	-0.80047	13.6632	0.000878373	0.12978	1.15662	-0.799759	2.14759	0.153265	0.432582	1.07155	0.3816	1.48956	2.22094	0.0405737	0.0829545
Mettl11b|ENSMUSG00000040113	0.371703	1.21047	5.32541	0.0281355	0.56264	-0.053297	1.21064	0.135144	0.715755	0.893834	2.00885	2.39105	-0.251276	-4.27344	0.000524914	0.00233068
Mettl20|ENSMUSG00000039958	0.317169	1.61567	4.87921	0.0350062	0.599971	0.219972	1.61543	2.85987	0.101248	0.342783	2.37246	3.50687	-0.563802	-7.64809	2.11682e-06	2.52969e-05
Mettl24|ENSMUSG00000045555	-0.519949	-0.644405	5.40704	0.0365412	0.611985	-0.300987	-0.644427	2.04888	0.20191	0.505388	0.765722	0.435822	0.81308	8.18797	3.68085e-07	6.10613e-06
Mettl9|ENSMUSG00000030876	-0.104824	6.67903	8.36822	0.0222665	0.524931	0.107555	6.67908	10.3097	0.0122866	0.0873074	103.222	103.606	-0.00535525	-0.22224	0.826941	0.87644
Mfsd10|ENSMUSG00000001082	0.197722	3.42344	10.6033	0.0197903	0.509232	-0.0920983	3.42339	2.70048	0.240365	0.552281	10.0025	10.7337	-0.101789	-2.78154	0.0151802	0.037085
Mgat4c|ENSMUSG00000019888	0.219046	3.19615	7.95831	0.0142991	0.461174	0.0407936	3.19608	0.324391	0.618831	0.842952	7.62078	9.30599	-0.28822	-4.93083	0.000302458	0.00147051
MIAT_exon5_3|ENSMUSG00000098395	0.461489	1.92385	10.1743	0.00333852	0.235469	0.851873	1.92429	42.3267	3.52946e-07	2.27035e-05	1.95618	4.85883	-1.31257	-12.1727	7.73975e-09	3.09447e-07
Miat|ENSMUSG00000097767	0.417451	6.60376	18.8731	0.000148516	0.0522546	0.85173	6.60427	87.9444	2.12974e-10	5.86837e-08	52.927	127.754	-1.27129	-19.5067	3.53306e-09	1.76239e-07
Mill2|ENSMUSG00000040987	0.519025	-0.190188	7.18354	0.0174013	0.500628	-0.223711	-0.190108	1.55703	0.267415	0.581962	0.687559	0.847891	-0.302396	-3.1791	0.00629172	0.0179415
Minos1|ENSMUSG00000050608	-0.110451	6.13218	10.2388	0.0215416	0.521742	0.112754	6.13222	12.5267	0.0120279	0.086039	70.9062	70.9673	-0.00124444	-0.0631677	0.950418	0.965045
Mkks|ENSMUSG00000027274	-0.113472	5.30558	9.78124	0.0393753	0.618556	0.0254033	5.30553	0.569934	0.62179	0.84461	41.4813	39.0138	0.0884781	6.65342	4.52157e-06	4.6425e-05
Mkrn1|ENSMUSG00000029922	-0.125762	7.22414	8.5483	0.00654289	0.30857	-0.0939038	7.2241	5.38598	0.0273308	0.150591	165.879	141.904	0.225212	11.6443	1.81103e-09	1.09877e-07
Mlip|ENSMUSG00000032355	0.257016	3.97297	8.09675	0.0079402	0.34107	-0.0431007	3.97281	0.269097	0.607769	0.837749	13.8648	16.2162	-0.226007	-4.01993	0.000914681	0.00364696
Mlkl|ENSMUSG00000012519	-0.674991	-1.76942	4.41694	0.044135	0.639958	0.134259	-1.76946	0.198771	0.658937	0.865039	0.327058	0.230689	0.503598	2.91315	0.00996505	0.026128
Morn4|ENSMUSG00000049670	0.132913	5.85627	10.2521	0.00803851	0.341417	0.107612	5.8563	7.73811	0.0214133	0.12786	52.2397	61.6105	-0.23803	-9.03766	3.44408e-07	5.77966e-06
Mospd1|ENSMUSG00000023074	-0.177517	3.59962	8.2296	0.0303455	0.575172	0.269618	3.59958	22.6281	0.000410034	0.00693143	11.9156	12.7211	-0.0943715	-2.67789	0.0169169	0.0404272
Mpdz|ENSMUSG00000028402	0.188342	5.71193	9.69927	0.0040487	0.265865	0.0207335	5.71191	0.135641	0.715256	0.893834	46.9903	54.6562	-0.218021	-5.65992	3.40489e-05	0.000241347
Mphosph9|ENSMUSG00000038126	0.115243	5.16184	6.90194	0.0448952	0.64336	-0.14064	5.16177	12.0953	0.00868564	0.0683666	35.6976	35.0822	0.0250887	1.02777	0.319703	0.432485
Mppe1|ENSMUSG00000062526	-0.173567	4.02583	8.46814	0.0190771	0.508495	-0.0995423	4.02577	3.25252	0.148199	0.426197	18.4212	15.3354	0.264499	6.40255	4.07056e-05	0.000278629
Ms4a6d|ENSMUSG00000024679	-0.390217	0.334479	4.18235	0.0497555	0.66942	0.22392	0.334446	1.56116	0.222986	0.530365	1.40086	1.23046	0.18711	2.08417	0.0584702	0.111421
Msc|ENSMUSG00000025930	1.04579	-1.65793	8.49036	0.00670627	0.313185	0.724077	-1.65802	6.50475	0.0161402	0.105804	0.121033	0.386074	-1.67348	-9.75195	2.63844e-08	7.85288e-07
Msh5|ENSMUSG00000007035	-0.884041	-0.835649	7.3203	0.0111596	0.407336	0.229648	-0.835741	0.50173	0.484245	0.764603	0.770748	0.390483	0.980999	4.10081	0.00302142	0.00970524
Msh6|ENSMUSG00000005370	0.201016	4.23427	10.7788	0.00440907	0.27085	-0.100372	4.23415	3.07583	0.129777	0.395831	17.3976	18.7899	-0.111072	-4.24316	0.000594819	0.00258679
Msra|ENSMUSG00000054733	-0.14098	4.71146	10.7101	0.0260721	0.550333	-0.0525139	4.71148	1.72333	0.375291	0.684248	28.7831	25.1302	0.195801	8.23896	1.37341e-06	1.77898e-05
mt-Co1|ENSMUSG00000064351	0.132948	14.8246	4.61469	0.0399416	0.62067	-0.0460928	14.8247	0.659154	0.423296	0.722645	28041.1	29737.3	-0.0847329	-1.92137	0.07462	0.135493
mt-Nd4|ENSMUSG00000064363	0.143786	12.9415	5.57377	0.0249644	0.545051	-0.0421308	12.9416	0.580721	0.452019	0.742933	7522.05	8036.69	-0.0954756	-2.14738	0.0479704	0.0949884
mt-Nd5|ENSMUSG00000064367	0.235574	13.0596	6.43503	0.0166603	0.498773	-0.143499	13.0597	2.80841	0.104233	0.349649	8122.59	8664.26	-0.0931377	-1.42621	0.172703	0.26633
Mtdh|ENSMUSG00000022255	-0.127938	6.44019	9.19326	0.00570686	0.29783	-0.0322735	6.44006	0.647599	0.459677	0.747569	92.9309	83.5001	0.154381	6.00095	5.84444e-05	0.000376439
Myadm|ENSMUSG00000068566	0.230512	5.16277	22.7801	5.85586e-05	0.0315176	0.0806849	5.16276	3.23884	0.128881	0.39464	30.7128	38.2319	-0.315937	-9.19246	9.33204e-08	2.02751e-06
Mybl2|ENSMUSG00000017861	-0.467772	0.0890933	5.90942	0.0247748	0.544738	0.263278	0.0891361	2.18793	0.172701	0.463316	1.12806	0.988297	0.190827	1.68502	0.117612	0.195719
Myh11|ENSMUSG00000018830	0.238575	2.66624	4.34452	0.045791	0.650099	-0.290242	2.66637	7.4646	0.0104724	0.0782815	6.26702	5.95751	0.0730699	0.984081	0.339295	0.453195
Myh15|ENSMUSG00000092009	-0.369777	0.900103	6.3726	0.024046	0.539851	-0.24426	0.90021	3.05453	0.118832	0.377184	2.32653	1.48906	0.643777	7.14514	1.55882e-05	0.000127605
Myh7b|ENSMUSG00000074652	-0.369795	2.14397	7.43341	0.0106132	0.399779	-1.02567	2.14372	63.7667	6.82343e-09	9.37539e-07	7.18308	2.78902	1.36485	14.2686	1.17428e-08	4.20993e-07
Myl12a|ENSMUSG00000024048	0.132953	4.93556	4.39794	0.0445627	0.641099	-0.0118179	4.93563	0.0414855	0.839988	0.944107	28.8172	31.2692	-0.117809	-3.09303	0.00870603	0.0234067
Myo18a|ENSMUSG00000000631	-0.0902875	7.53309	5.69061	0.0432488	0.634625	-0.00849365	7.53326	0.0545563	0.839715	0.944107	189.444	177.252	0.0959689	4.13212	0.000910406	0.00363409
Myo19|ENSMUSG00000020527	0.21612	2.64976	4.27518	0.0474414	0.659238	0.0203647	2.64989	0.0435716	0.836073	0.942846	5.54117	6.56047	-0.243608	-3.62519	0.00228127	0.00768483
Myo1c|ENSMUSG00000017774	0.200316	3.69673	7.57629	0.0127084	0.440018	0.300277	3.69687	19.6479	0.000116342	0.0025763	10.3042	14.6553	-0.50819	-12.0136	3.97425e-08	1.06422e-06
Myo5b|ENSMUSG00000025885	-0.145225	6.23276	7.61548	0.00979372	0.386762	-0.039755	6.23282	0.642329	0.429212	0.727066	80.0659	70.3595	0.186442	6.99121	3.71242e-06	3.96758e-05
Myo5c|ENSMUSG00000033590	-0.642923	3.21543	34.5473	2.00445e-06	0.00572572	1.20912	3.21619	133.217	1.60265e-12	1.37627e-09	7.11484	10.4575	-0.555629	-8.81776	3.06031e-07	5.27334e-06
Myo7a|ENSMUSG00000030761	0.926699	3.76204	10.0361	0.00353018	0.243967	-0.129396	3.76245	0.230115	0.63494	0.853027	9.53642	14.3723	-0.591774	-3.88229	0.00125909	0.00472691
Mzt1|ENSMUSG00000033186	-0.102216	6.89425	8.40923	0.0237357	0.534826	-0.0526173	6.89415	2.57918	0.213082	0.518516	126.994	114.265	0.152375	8.16595	7.25597e-07	1.06954e-05
N4bp2|ENSMUSG00000037795	0.253318	3.49784	5.89706	0.0214094	0.521742	0.200217	3.49774	4.2088	0.0490927	0.221075	8.80166	12.5986	-0.517413	-9.81982	4.87914e-08	1.22522e-06
Nagk|ENSMUSG00000034744	0.25959	4.52803	12.5798	0.00131091	0.156025	0.145623	4.5279	4.45694	0.0432578	0.203828	19.2123	25.6255	-0.41555	-9.48481	1.07921e-07	2.27262e-06
Nap1l1|ENSMUSG00000058799	-0.115585	6.76357	8.28563	0.0111442	0.407336	0.0620302	6.76359	2.75668	0.144236	0.41988	112.617	108.76	0.0502779	1.98097	0.0713384	0.130549
Nckap1|ENSMUSG00000027002	-0.119337	9.53526	7.4795	0.0103989	0.396341	-0.0994505	9.53521	6.03719	0.0201309	0.122867	815.975	699.421	0.222363	10.0502	1.51155e-07	2.97038e-06
Ncor2|ENSMUSG00000029478	0.144164	6.72315	8.08451	0.0079823	0.34121	-0.11635	6.72316	6.19423	0.0186326	0.116454	102.625	103.844	-0.0170386	-0.562948	0.581077	0.680216
Ndfip2|ENSMUSG00000053253	-0.195498	7.26776	9.90928	0.00371644	0.251836	-0.0413221	7.26768	0.528987	0.472708	0.757276	172.591	146.063	0.240766	6.94345	5.30585e-05	0.000346508
Ndst3|ENSMUSG00000027977	0.476206	2.56179	21.5401	6.47903e-05	0.0336497	0.115715	2.56171	1.52238	0.234899	0.545778	4.36232	6.49757	-0.574805	-8.79361	1.49473e-07	2.95068e-06
Neat1|ENSMUSG00000092274	-0.146717	7.57323	4.47767	0.0427975	0.633368	0.0184198	7.57326	0.0775569	0.782559	0.921482	203.727	185.225	0.137359	2.39703	0.0362439	0.0756259
Necab1|ENSMUSG00000040536	-0.189784	7.71295	7.9336	0.00852195	0.354509	0.118709	7.71302	3.67677	0.0648042	0.262116	215.249	205.143	0.069376	1.57585	0.137421	0.22221
Necab2|ENSMUSG00000031837	-0.122609	7.6811	9.29361	0.0061288	0.30456	0.0802212	7.68126	4.39168	0.055614	0.238673	208.952	203.579	0.0375843	2.46381	0.0262214	0.0578064
Nedd9|ENSMUSG00000021365	-0.210842	3.77822	6.05189	0.0199066	0.509232	0.23169	3.7782	8.68138	0.00618722	0.0536076	13.7915	14.0179	-0.0234875	-0.366018	0.719491	0.792472
Nefh|ENSMUSG00000020396	-0.221124	5.29121	6.1513	0.0190027	0.508495	0.108368	5.29139	1.66765	0.2065	0.510748	42.0527	38.2247	0.137693	2.24825	0.0391195	0.0805222
Nek10|ENSMUSG00000042567	0.580742	0.934233	5.34376	0.0278867	0.56264	0.691357	0.934344	9.44975	0.00448859	0.0426392	0.950177	2.34355	-1.30243	-8.99026	9.89447e-07	1.35615e-05
Nek7|ENSMUSG00000026393	0.12563	5.7677	6.32739	0.0175096	0.501835	-0.0107051	5.76766	0.0533185	0.821907	0.937458	51.0957	55.5192	-0.119784	-4.25415	0.000553591	0.00243681
Nell2|ENSMUSG00000022454	0.180068	7.84283	13.9831	0.000782177	0.124459	-0.12802	7.84268	7.74319	0.00926442	0.0716095	220.437	230.027	-0.0614393	-1.65361	0.117578	0.195703
Net1|ENSMUSG00000021215	0.282143	3.86905	5.98184	0.0205717	0.514272	0.322279	3.86908	8.9381	0.00555293	0.0496727	10.6925	16.5252	-0.628071	-9.12839	5.79234e-08	1.40375e-06
Neto2|ENSMUSG00000036902	-0.352084	8.06506	17.9725	0.000198778	0.0597235	0.0164249	8.0652	0.0459224	0.831776	0.941587	304.432	241.621	0.333374	6.47056	3.10069e-05	0.000222787
Neu2|ENSMUSG00000079434	-0.197105	3.60698	4.67934	0.0386682	0.615196	0.0282793	3.6072	0.111238	0.741074	0.90427	13.0741	11.624	0.1696	2.65083	0.0187195	0.0439422
Neurl1b|ENSMUSG00000034413	0.291351	5.2826	20.0743	0.000101602	0.0441088	0.252896	5.28273	16.3095	0.000346643	0.00603812	30.1813	43.4665	-0.526253	-11.6834	7.26019e-09	2.96361e-07
Neurod2|ENSMUSG00000038255	-1.26992	0.916082	13.7992	0.000836018	0.128231	0.450929	0.915821	1.78765	0.191329	0.490285	1.53218	1.96215	-0.356852	-1.07129	0.308073	0.420126
Neurod6|ENSMUSG00000037984	-0.787627	1.64354	4.60745	0.0400872	0.62067	0.395858	1.64339	1.26209	0.270224	0.585365	2.84948	3.09768	-0.120488	-0.70793	0.491248	0.60237
Nexn|ENSMUSG00000039103	-0.141175	6.3063	6.40537	0.0168897	0.499091	-0.435217	6.30609	76.2532	1.02964e-09	2.10525e-07	100.728	66.8155	0.592207	20.3638	5.86631e-09	2.51961e-07
Nfxl1|ENSMUSG00000072889	0.168875	3.67955	7.25931	0.0341857	0.597761	0.0662921	3.67956	1.2746	0.373946	0.68363	11.3196	13.3448	-0.237448	-6.24406	9.76356e-06	8.74638e-05
Ngdn|ENSMUSG00000022204	-0.177086	3.82667	7.8342	0.0218397	0.521742	0.104908	3.82657	3.09416	0.15016	0.428413	14.8518	14.1594	0.0688812	1.37599	0.189178	0.286141
Ngef|ENSMUSG00000026259	-0.144919	9.49376	5.71336	0.0233558	0.532473	-0.0448228	9.49383	0.61635	0.438604	0.733998	787.072	688.059	0.193964	6.10707	0.000126883	0.000719734
Nhlrc1|ENSMUSG00000044231	-0.206128	4.18174	5.07303	0.0318176	0.582505	0.00405385	4.18152	0.00231443	0.961951	0.989139	20.3354	17.731	0.197725	3.37755	0.00427363	0.0129689
Nicn1|ENSMUSG00000032606	0.101773	6.05229	7.20446	0.0352619	0.601566	-0.0188027	6.05224	0.282159	0.675649	0.873486	63.9522	67.7446	-0.0831129	-3.73663	0.00164202	0.00586503
Nip7|ENSMUSG00000031917	-0.13219	4.9953	8.80376	0.0276739	0.56264	0.106407	4.99521	6.64283	0.0578567	0.244323	32.5459	32.0567	0.0218531	1.01568	0.32425	0.436763
Nkapl|ENSMUSG00000059395	1.35372	-1.72618	9.28124	0.00480947	0.283245	-0.322172	-1.72633	0.771354	0.386824	0.694961	0.133652	0.273661	-1.03391	-3.29933	0.0043938	0.0132663
Nkx2-2|ENSMUSG00000027434	-0.238917	2.26464	5.11424	0.0376742	0.614628	0.231748	2.26461	5.34775	0.031816	0.166612	4.94105	4.89205	0.0143777	0.25382	0.803772	0.858544
Nme3|ENSMUSG00000073435	-0.159787	3.69825	7.42309	0.0448691	0.64336	-0.0269809	3.6982	0.242158	0.718481	0.894992	14.1882	12.5367	0.178537	8.25765	2.72582e-07	4.79214e-06
Nova1|ENSMUSG00000021047	0.0973808	6.24158	6.30442	0.0394287	0.618556	-0.0881758	6.2415	5.78433	0.0471089	0.214969	74.2921	74.9812	-0.0133198	-0.803336	0.433939	0.54759
Npas2|ENSMUSG00000026077	-0.1735	6.31038	8.05988	0.00806779	0.341417	-0.0727552	6.3104	1.62612	0.212091	0.517204	88.3405	74.4295	0.247199	6.59422	1.26153e-05	0.000108046
Nphs1os|ENSMUSG00000087009	-0.624809	-1.30788	7.84661	0.025864	0.550333	0.456244	-1.30791	4.82737	0.0840034	0.306905	0.444636	0.394303	0.17332	1.48504	0.16377	0.255368
Npl|ENSMUSG00000042684	-0.215833	3.1008	4.57749	0.0406956	0.623461	0.199336	3.10102	4.41594	0.0441663	0.206917	8.55866	8.54552	0.00221547	0.0305887	0.975965	0.983063
Npr2|ENSMUSG00000028469	0.16015	5.08224	7.7924	0.00906284	0.368076	0.16177	5.0823	9.18383	0.0050112	0.0460499	29.5423	36.8372	-0.318382	-8.30471	1.33029e-06	1.73298e-05
Nptn|ENSMUSG00000032336	-0.099936	9.74735	6.08483	0.030478	0.575172	-0.0682037	9.74733	3.42189	0.11329	0.367531	925.978	822.713	0.170589	9.88433	4.76861e-08	1.20619e-06
Npy1r|ENSMUSG00000036437	0.239681	3.932	6.70971	0.0146899	0.467974	0.439804	3.93192	26.9376	1.38642e-05	0.000462366	11.2578	18.2368	-0.695931	-13.1163	4.83133e-10	4.12226e-08
Nr3c2|ENSMUSG00000031618	0.158853	5.0398	6.77248	0.0142762	0.461174	-0.0480714	5.03968	0.697199	0.41037	0.711925	30.4155	33.0587	-0.120222	-3.04701	0.00971829	0.0256124
Nrxn1|ENSMUSG00000024109	0.0904127	8.15248	8.70438	0.0433287	0.635194	-0.0698565	8.15248	6.11399	0.0943585	0.328324	279.131	283.707	-0.0234618	-1.38316	0.186437	0.282768
Nt5c1a|ENSMUSG00000054958	-0.56894	1.27723	9.55294	0.00429907	0.270077	-0.272739	1.27739	2.47599	0.126154	0.389622	3.34881	1.85606	0.85141	5.86583	6.25472e-05	0.000398282
Ntm|ENSMUSG00000059974	-0.119349	7.67097	6.35095	0.0173197	0.500628	-0.0350801	7.67091	0.66901	0.419889	0.719679	219.145	197.276	0.151668	4.99388	0.000519163	0.00231225
Ntrk3|ENSMUSG00000059146	-0.107385	5.84073	4.55016	0.0412594	0.628015	0.0736382	5.84075	2.48503	0.125491	0.388669	59.0173	57.3423	0.0415391	1.39369	0.181584	0.2769
Nubp2|ENSMUSG00000039183	-0.191555	4.35809	9.15144	0.00581539	0.300211	0.142566	4.35806	5.82973	0.0280939	0.153313	21.0413	20.3803	0.0460457	1.03052	0.319777	0.43252
Nup35|ENSMUSG00000026999	-0.187419	3.25609	6.15311	0.0314542	0.57997	-0.079095	3.25609	1.24755	0.334261	0.646939	10.6933	8.90996	0.263214	6.30489	9.4928e-06	8.54352e-05
Nupr1l|ENSMUSG00000095789	-0.785306	-1.50696	5.16124	0.0304736	0.575172	0.486764	-1.507	2.23431	0.14549	0.422308	0.409089	0.353625	0.210196	1.02391	0.320226	0.432956
Nxph3|ENSMUSG00000046719	-0.429821	2.38561	8.17691	0.00767023	0.334504	-0.0969202	2.38561	0.466062	0.500077	0.77571	6.03144	4.5808	0.396902	4.33249	0.000516936	0.00230469
Nyap1|ENSMUSG00000045348	0.107808	6.08261	5.45731	0.0263996	0.553339	-0.0832662	6.08263	3.62542	0.0665977	0.266873	66.0498	67.3	-0.0270529	-0.964155	0.351369	0.466021
Odf4|ENSMUSG00000032921	-0.437782	0.363833	4.73104	0.0376819	0.614628	-0.672757	0.363953	11.7909	0.0017699	0.0214755	1.89297	0.891703	1.08601	10.1419	1.26004e-08	4.44394e-07
Ogdhl|ENSMUSG00000021913	0.0948958	6.81846	8.76312	0.0371948	0.612374	-0.00196164	6.81848	0.00440012	0.963198	0.98972	108.191	115.434	-0.0934878	-4.57855	0.000267287	0.00132551
Ogt|ENSMUSG00000034160	0.102726	8.94614	5.43381	0.0267	0.553339	-0.0418036	8.94608	1.04189	0.329891	0.642826	483.385	505.304	-0.0639768	-2.97275	0.00979929	0.025771
Olfm1|ENSMUSG00000026833	0.0931764	6.82389	7.72937	0.0406278	0.623461	0.00301466	6.8239	0.00912514	0.943719	0.982055	104.831	116.419	-0.151259	-3.41314	0.00776829	0.021352
Olfm2|ENSMUSG00000032172	0.156236	4.48746	6.66323	0.0224059	0.525181	0.526295	4.48763	86.47	2.57475e-10	6.80329e-08	16.6448	26.3015	-0.660069	-17.3103	3.07614e-10	3.08539e-08
Olfm3|ENSMUSG00000027965	0.299367	5.22415	20.0109	0.000103632	0.0441088	0.0837633	5.22394	1.77856	0.192429	0.491664	30.2171	40.6652	-0.428427	-7.89381	6.41568e-06	6.18815e-05
Onecut2|ENSMUSG00000045991	-0.179229	6.85805	4.74098	0.0374954	0.614628	0.747119	6.85843	93.7492	1.03213e-10	3.28274e-08	91.2761	132.471	-0.537366	-9.65213	2.66428e-08	7.9162e-07
Orc4|ENSMUSG00000026761	-0.0996441	6.16617	6.84323	0.0375117	0.614628	-0.037322	6.16618	1.11496	0.404862	0.708344	76.7616	69.7541	0.138107	5.63199	5.69084e-05	0.000367912
Osbpl1a|ENSMUSG00000044252	0.44005	7.00634	17.8268	0.000208493	0.0597235	-0.570704	7.00622	33.7968	2.4075e-06	0.000111153	126.753	116.645	0.119901	1.61773	0.131039	0.213802
Osbpl5|ENSMUSG00000037606	0.166344	3.96573	7.26271	0.0281917	0.56264	0.224764	3.9657	15.4352	0.00139538	0.0179787	13.0577	16.9713	-0.378193	-11.9057	4.48793e-09	2.0934e-07
Osbpl8|ENSMUSG00000020189	-0.163791	8.728	5.76239	0.022818	0.529746	-0.192011	8.72793	9.0439	0.0053123	0.048071	498.056	387.864	0.360757	7.98838	1.18677e-06	1.58284e-05
Ostm1|ENSMUSG00000038280	-0.098939	5.83139	11.3508	0.0476612	0.66036	0.0803057	5.83134	8.73889	0.0864237	0.312266	57.4888	56.8526	0.0160523	1.23105	0.239118	0.344045
Otof|ENSMUSG00000062372	-0.436977	4.74271	13.5165	0.000926673	0.131977	-0.111937	4.74295	1.00823	0.323411	0.637067	35.0192	23.1012	0.600179	7.69829	2.51561e-06	2.93353e-05
P2ry1|ENSMUSG00000027765	0.347698	3.40003	5.89794	0.0214006	0.521742	-0.356211	3.39962	7.14414	0.0120775	0.0862855	9.61619	9.80806	-0.0285022	-0.280565	0.784199	0.844156
P4ha1|ENSMUSG00000019916	-0.128993	6.4148	4.70222	0.0382282	0.614628	0.0870906	6.41505	2.4549	0.127716	0.392262	88.0759	85.5997	0.0411406	0.812256	0.439352	0.552998
Pacrg|ENSMUSG00000037196	-1.87967	3.74682	32.133	3.59956e-06	0.00881326	0.28349	3.74742	0.744248	0.395193	0.70173	32.1254	1.54054	4.3822	6.18338	2.83978e-05	0.000207186
Pak3|ENSMUSG00000031284	0.105582	6.95077	9.43939	0.019267	0.509232	-0.0490116	6.95064	2.28166	0.243926	0.556808	119.538	124.421	-0.0577664	-2.5165	0.0257788	0.056961
Papln|ENSMUSG00000021223	-0.265589	3.82312	6.56478	0.0156958	0.490002	-0.136685	3.82325	1.89677	0.178697	0.472245	17.0738	12.7085	0.425989	5.729	0.000128366	0.000726248
Pard6b|ENSMUSG00000044641	-0.2404	3.21711	5.73274	0.0231415	0.531139	-0.127384	3.21708	1.83192	0.186077	0.483053	11.0855	8.5279	0.378409	6.07287	3.32073e-05	0.000236286
Parm1|ENSMUSG00000034981	0.1227	5.84279	7.12476	0.0140733	0.458561	0.395018	5.84304	83.8821	3.61392e-10	8.99552e-08	44.2497	64.4682	-0.542921	-15.2122	9.88305e-10	6.97117e-08
Pcdh10|ENSMUSG00000049100	0.221204	7.81619	10.9004	0.00249988	0.204026	-0.0602639	7.81608	0.909755	0.347852	0.660515	203.722	228.934	-0.168327	-3.74772	0.00288502	0.00932753
Pcdh20|ENSMUSG00000050505	0.355088	3.83437	8.35169	0.0071155	0.322626	0.319225	3.83421	7.81097	0.00899399	0.0700943	10.3439	17.1975	-0.733414	-8.93768	8.74753e-08	1.92623e-06
Pcdhb12|ENSMUSG00000043458	0.198767	3.33351	4.45011	0.0433988	0.635194	0.177428	3.33347	4.10586	0.0517663	0.228263	8.39778	10.9314	-0.380394	-7.41905	1.00297e-06	1.37144e-05
Pcdhb13|ENSMUSG00000047307	0.438785	3.69137	14.1462	0.000737549	0.121547	0.201269	3.69123	3.56328	0.0688427	0.27275	8.98142	14.6383	-0.704734	-10.8456	6.69688e-09	2.81366e-07
Pcdhb14|ENSMUSG00000044043	0.159559	3.95766	4.95336	0.0346357	0.598409	-0.201764	3.95754	9.25046	0.00487436	0.0450334	14.8254	14.5536	0.0266928	0.683019	0.503821	0.613581
Pcdhb16|ENSMUSG00000047910	0.214349	4.29489	7.4555	0.0105099	0.398516	0.317438	4.29482	18.5867	0.000163117	0.00332723	14.7589	21.9754	-0.574303	-13.698	1.34065e-09	8.68024e-08
Pcdhb17|ENSMUSG00000046387	0.156094	4.75394	6.74436	0.0144599	0.464098	0.215178	4.75397	14.7765	0.000589828	0.00923455	22.3053	28.9483	-0.376092	-12.3235	7.02904e-10	5.49405e-08
Pcdhb19|ENSMUSG00000043313	0.175935	4.62891	4.88936	0.0348308	0.599344	0.325362	4.62882	18.9978	0.000142965	0.00302764	19.5095	28.1236	-0.527606	-11.0268	1.83707e-07	3.4762e-06
Pcdhb22|ENSMUSG00000073591	0.214856	3.18974	8.17944	0.0159176	0.49067	0.154283	3.18969	4.8123	0.0640319	0.260023	7.71838	10.0004	-0.373685	-7.97787	2.36465e-06	2.77991e-05
Pcdhb6|ENSMUSG00000051678	-0.349641	3.30755	6.43295	0.0166763	0.498773	0.651733	3.30736	26.5756	1.53e-05	0.00049863	9.52948	11.7181	-0.29827	-3.04512	0.00829126	0.0225174
Pcdhb7|ENSMUSG00000045062	-0.333867	4.02751	9.09918	0.0051879	0.287551	0.676648	4.02749	43.9053	2.53898e-07	1.75129e-05	15.0871	19.3655	-0.360171	-4.05109	0.00119419	0.00453001
Pcdhb9|ENSMUSG00000051242	0.428161	4.11804	13.2299	0.00102946	0.136775	0.0278564	4.11799	0.0634249	0.802891	0.929849	13.1179	18.4962	-0.495686	-6.29467	1.00185e-05	8.93321e-05
Pcgf3|ENSMUSG00000033623	0.104147	5.82887	6.72544	0.0359574	0.608365	-0.0206349	5.82881	0.294381	0.658051	0.86484	54.6637	58.0167	-0.0858855	-3.07946	0.00821394	0.0223609
Pcnt|ENSMUSG00000001151	0.123437	5.10765	6.25838	0.032672	0.586352	-0.0310556	5.10769	0.451935	0.568537	0.816508	32.6488	34.8702	-0.0949642	-3.37676	0.00725983	0.0201524
Pcp4|ENSMUSG00000090223	-0.213966	9.76881	6.4084	0.0168661	0.499091	-0.122621	9.76883	2.55781	0.120299	0.379945	1009.41	801.693	0.332393	5.59101	0.000224038	0.00114541
Pcsk1|ENSMUSG00000021587	0.392796	3.60679	12.8187	0.0011989	0.146771	0.0212253	3.60667	0.0438457	0.835566	0.942682	10.0659	14.1065	-0.486888	-7.8996	5.00769e-07	7.86742e-06
Pcyt1b|ENSMUSG00000035246	0.181573	5.66719	19.5581	0.000427778	0.0894107	0.196769	5.66722	27.3379	4.41595e-05	0.00116325	42.7231	55.6483	-0.381319	-16.6582	2.63442e-09	1.46515e-07
Pde10a|ENSMUSG00000023868	-0.3319	9.61594	23.0474	4.13823e-05	0.0253304	-0.0379728	9.616	0.349208	0.559017	0.810348	914.348	707.827	0.369346	7.47414	2.02626e-06	2.44164e-05
Pde1b|ENSMUSG00000022489	-0.256283	10.72	18.4677	0.000169212	0.0557716	-0.0853596	10.7201	2.33947	0.136678	0.40733	1931.18	1526.23	0.339512	12.3628	3.01409e-09	1.58968e-07
Pde4c|ENSMUSG00000031842	0.473379	1.21556	10.0614	0.00349422	0.243445	0.104897	1.21571	0.564466	0.461961	0.749214	1.71226	2.56457	-0.582818	-6.3946	1.49053e-05	0.000123278
Pde4d|ENSMUSG00000074661	0.149179	4.38244	7.00755	0.0299964	0.575066	0.153501	4.38238	8.26966	0.0174722	0.11144	18.0758	22.6245	-0.323825	-11.2131	7.38131e-08	1.70094e-06
Pde7b|ENSMUSG00000019990	-0.146162	8.53031	7.60246	0.00984996	0.387198	0.0777119	8.5303	2.43198	0.129439	0.395471	380.886	361.507	0.0753383	2.49141	0.0233661	0.0526352
Pdlim5|ENSMUSG00000028273	0.230474	5.42353	7.07267	0.0124656	0.434243	-0.14133	5.42356	3.0353	0.0917838	0.323694	40.4633	43.4928	-0.104161	-3.14754	0.00598968	0.017236
Pdp1|ENSMUSG00000049225	-0.285575	7.8174	24.9545	2.39262e-05	0.0189514	-0.218251	7.81749	16.7403	0.000299623	0.00541118	284.37	200.678	0.502885	12.1646	8.20107e-10	6.08141e-08
Pea15a|ENSMUSG00000013698	0.0938928	8.84902	7.3092	0.0380919	0.614628	0.108861	8.84907	11.6888	0.0109981	0.080838	418.18	481.096	-0.202203	-11.2407	7.69773e-08	1.75495e-06
Peli2|ENSMUSG00000021846	-0.124496	5.79761	6.20459	0.0185367	0.508152	0.0776846	5.79764	2.87434	0.100426	0.340633	57.2692	55.5055	0.0451275	1.63524	0.123555	0.203873
Penk|ENSMUSG00000045573	-0.492048	10.6782	24.564	2.67217e-05	0.0199123	-0.0241264	10.6784	0.0693823	0.794051	0.926608	1967.61	1395.53	0.495636	10.1869	4.94742e-07	7.79724e-06
Pgam2|ENSMUSG00000020475	0.250184	3.01082	4.27103	0.0475423	0.659245	0.884696	3.01137	64.5283	6.03662e-09	8.3612e-07	4.48985	9.7396	-1.1172	-14.634	8.92665e-09	3.44212e-07
Pgap2|ENSMUSG00000030990	0.298516	3.21354	12.6698	0.00126744	0.152976	-0.151296	3.21354	3.68886	0.06439	0.260948	8.33173	9.22105	-0.146316	-2.59969	0.0195062	0.0455234
Pgm2l1|ENSMUSG00000030729	0.133318	7.23682	8.83989	0.00578348	0.299466	0.0115049	7.23677	0.0751057	0.785933	0.92377	138.313	153.94	-0.154432	-4.87185	0.000287728	0.00140837
Phex|ENSMUSG00000057457	-0.619122	3.61839	8.5101	0.00665012	0.311411	0.392504	3.61878	3.91768	0.0570836	0.242676	13.4665	11.9469	0.172738	1.55701	0.144513	0.231584
Phf2|ENSMUSG00000038025	0.0968318	5.97477	7.50994	0.0472199	0.65904	-0.0107369	5.97481	0.105189	0.813639	0.934101	59.3859	63.1514	-0.0886946	-4.77157	0.000270205	0.00133731
Pi16|ENSMUSG00000024011	0.532001	0.0553142	7.03843	0.0127374	0.440134	0.178731	0.0553091	1.01539	0.345326	0.658306	0.672364	1.11205	-0.725908	-6.9435	2.47867e-06	2.89641e-05
Picalm|ENSMUSG00000039361	-0.0991854	7.93733	7.52329	0.0273675	0.559727	0.132277	7.93731	15.4198	0.00175868	0.021407	241.702	247.508	-0.034244	-1.34169	0.205308	0.304905
Pigf|ENSMUSG00000024145	-0.187531	3.48853	7.42618	0.0251514	0.548041	0.104249	3.48848	2.59352	0.18309	0.478553	11.7374	11.0351	0.0890171	1.70521	0.112536	0.189035
Pigq|ENSMUSG00000025728	0.101978	6.46442	11.7507	0.0284723	0.56264	0.0236951	6.46448	0.730366	0.586137	0.827717	82.9134	90.4712	-0.125853	-7.07026	8.50683e-06	7.8308e-05
Pik3ip1|ENSMUSG00000034614	0.144263	4.25904	7.39677	0.0406218	0.623461	-0.138407	4.25889	7.89072	0.0361862	0.181247	18.6515	18.7408	-0.00689265	-0.231166	0.819948	0.87121
Pipox|ENSMUSG00000017453	-0.324247	2.08652	7.13581	0.0121175	0.42821	-0.115293	2.08668	0.993405	0.326935	0.640568	4.86756	3.63742	0.420282	7.24334	1.97045e-06	2.38746e-05
Pkmyt1|ENSMUSG00000023908	0.310909	1.52899	5.90248	0.0282621	0.56264	-0.219742	1.52894	3.5309	0.0918535	0.323833	2.77008	2.95558	-0.0935142	-1.17289	0.260822	0.368489
Pla2g3|ENSMUSG00000034579	-0.385204	1.52258	14.0075	0.00692608	0.318523	0.307461	1.5228	10.0129	0.022347	0.131492	2.98735	2.85217	0.0668039	1.17502	0.257429	0.364676
Pla2g7|ENSMUSG00000023913	-0.140076	7.22655	9.59002	0.00423409	0.26977	0.130148	7.22658	9.73707	0.0039893	0.0390851	153.783	152.771	0.00952757	0.330346	0.745229	0.81395
Plcb1|ENSMUSG00000051177	-0.143775	8.02899	4.93183	0.034107	0.597761	-0.25967	8.02886	19.3669	0.000127134	0.00276747	310.289	233.092	0.412714	11.9647	9.37398e-09	3.56704e-07
Plce1|ENSMUSG00000024998	-0.14505	4.75167	5.23119	0.0294523	0.569592	0.508459	4.75196	72.6342	1.7384e-09	3.28099e-07	21.9689	29.2482	-0.412886	-10.4939	8.29915e-08	1.84861e-06
Plcxd1|ENSMUSG00000064247	-0.238022	5.07198	14.7485	0.000594962	0.109646	-0.18229	5.07209	9.38547	0.00460929	0.0435688	39.4792	29.6527	0.412927	10.0136	3.40293e-07	5.7235e-06
Pld3|ENSMUSG00000003363	-0.138035	9.25364	9.18634	0.00500287	0.283921	-0.0843252	9.25368	4.02215	0.0540601	0.234698	670.797	576.511	0.218528	8.56634	2.21067e-06	2.62736e-05
Plekhg4|ENSMUSG00000014782	-0.292818	2.75469	4.50253	0.0422629	0.632562	0.386729	2.75513	8.77532	0.00594647	0.0521998	6.41765	7.19687	-0.165326	-2.05237	0.0587762	0.111891
Plekhh2|ENSMUSG00000040852	0.212462	3.94246	6.44808	0.0165605	0.498773	0.244917	3.94268	9.69148	0.00406435	0.039662	12.3983	17.1082	-0.46455	-8.15917	1.66912e-06	2.09419e-05
Plekhm3|ENSMUSG00000051344	0.141311	6.1076	12.1347	0.00311743	0.228487	-0.176602	6.1075	22.1387	8.49745e-05	0.00199923	68.3165	66.6503	0.0356226	1.361	0.201309	0.30038
Plk5|ENSMUSG00000035486	-0.502263	4.18092	18.0246	0.000195416	0.0597235	-0.216142	4.18116	3.72537	0.063157	0.257654	23.5137	14.6661	0.681016	9.52459	1.71819e-07	3.309e-06
Pln|ENSMUSG00000038583	0.630941	-0.149697	5.21132	0.0297384	0.573326	-0.255648	-0.149777	1.0936	0.304083	0.618429	0.743163	0.901797	-0.279125	-1.9043	0.0776121	0.139687
Plxdc1|ENSMUSG00000017417	-0.255438	4.75704	13.7134	0.00086246	0.128537	0.313984	4.7574	23.1697	4.00209e-05	0.00108914	26.7404	27.7875	-0.0554162	-1.07195	0.308679	0.420851
Plxna1|ENSMUSG00000030084	0.142198	4.90821	7.78287	0.0198591	0.509232	0.0482628	4.90832	1.02776	0.399877	0.704061	26.6879	30.5273	-0.193912	-6.14026	1.1475e-05	0.000100208
Plxna3|ENSMUSG00000031398	0.227932	3.70701	5.71062	0.0233862	0.532473	0.24123	3.70715	7.58814	0.00991685	0.0751641	10.4773	14.3602	-0.454806	-10.0406	3.48557e-08	9.73939e-07
Plxnb1|ENSMUSG00000053646	0.129617	7.22518	6.39013	0.017009	0.500029	0.0589869	7.22531	1.54755	0.223193	0.530365	136.707	155.475	-0.185593	-5.6636	4.02042e-05	0.000275958
Pnma3|ENSMUSG00000046287	0.280203	2.98346	6.09692	0.0194915	0.509232	0.825136	2.98384	62.028	9.06053e-09	1.1527e-06	4.68676	9.88576	-1.07676	-16.1435	9.92527e-12	2.68745e-09
Podn|ENSMUSG00000028600	-0.515808	-0.487485	5.51358	0.0390286	0.616509	0.269161	-0.487357	1.54514	0.274208	0.589379	0.668902	0.638207	0.0677709	0.460477	0.651968	0.738877
Pold3|ENSMUSG00000030726	0.119912	4.92933	5.84068	0.0467946	0.656312	0.0470225	4.9294	0.995507	0.406747	0.709036	27.9686	31.5392	-0.173334	-5.7018	2.64292e-05	0.000195481
Pole2|ENSMUSG00000020974	-0.57982	-0.556438	8.32189	0.0190718	0.508495	0.405768	-0.556394	4.91392	0.0725562	0.281356	0.733935	0.670357	0.130721	1.22171	0.242619	0.347797
Polr2a|ENSMUSG00000005198	0.234976	6.33635	16.4607	0.000328824	0.0761584	-0.119751	6.3361	4.87266	0.0351283	0.178183	75.1913	82.3393	-0.131015	-3.39289	0.00440852	0.0133014
Polr2c|ENSMUSG00000031783	-0.146876	3.99688	9.50647	0.0492434	0.669366	-0.0842002	3.99686	3.49321	0.228391	0.537344	17.6323	15.0502	0.228437	9.91558	1.92408e-07	3.62504e-06
Polr3e|ENSMUSG00000030880	0.172246	5.24782	5.13665	0.0308419	0.577846	-0.0464384	5.24778	0.415147	0.524297	0.791283	34.5462	38.0511	-0.139414	-2.68151	0.0170186	0.0406137
Pomgnt1|ENSMUSG00000028700	0.0947606	6.104	6.57114	0.0496923	0.66942	0.00118399	6.10402	0.00113026	0.979077	0.99442	65.8743	70.2972	-0.0937497	-5.49885	3.92149e-05	0.000270775
Por|ENSMUSG00000005514	-0.115582	6.27372	8.09949	0.0146383	0.467764	0.0701003	6.27377	3.25237	0.116039	0.372326	78.9796	76.3387	0.0490653	2.06789	0.0588846	0.112036
Pou6f2|ENSMUSG00000009734	0.671581	1.27657	11.1061	0.00230587	0.197601	0.30853	1.27628	2.689	0.111557	0.364466	1.32054	2.98353	-1.17589	-9.16376	8.23803e-08	1.84462e-06
Ppargc1a|ENSMUSG00000029167	-0.114749	5.80664	6.88468	0.0222343	0.524931	0.0935677	5.80659	5.44563	0.0464986	0.213262	57.1618	56.2377	0.0235135	0.78241	0.445907	0.559221
Ppfia2|ENSMUSG00000053825	0.102269	6.2295	8.31986	0.0308726	0.577846	0.156637	6.22945	21.7722	0.000429842	0.00718844	66.4186	80.4242	-0.276042	-12.6644	4.50831e-10	4.00275e-08
Ppfia3|ENSMUSG00000003863	0.0937459	6.77206	8.59951	0.0395872	0.618556	0.033589	6.77211	1.2761	0.434081	0.731543	102.133	111.787	-0.130301	-6.28091	0.000146506	0.000808838
Ppil6|ENSMUSG00000078451	-0.371855	1.15114	6.1973	0.0186324	0.508495	0.482484	1.15119	12.1695	0.00153187	0.0192254	2.2113	2.40701	-0.122351	-1.17719	0.25611	0.363133
Ppp1ca|ENSMUSG00000040385	-0.153579	8.73349	7.65392	0.00962964	0.382993	-0.088233	8.73351	2.93479	0.0970757	0.33419	472.646	399.369	0.24304	9.49259	4.71741e-07	7.48916e-06
Ppp1r12c|ENSMUSG00000019254	-0.129656	6.88458	12.7661	0.00432773	0.270077	-0.0380366	6.8847	1.2286	0.370842	0.681126	128.46	114.782	0.162419	8.48047	2.2816e-07	4.1674e-06
Ppp1r14c|ENSMUSG00000040653	-0.227198	2.88981	6.43304	0.0191712	0.509232	0.162047	2.8899	3.78614	0.0715695	0.279111	7.75047	7.38348	0.0699826	1.23567	0.243851	0.349147
Ppp1r16b|ENSMUSG00000037754	-0.133517	8.87401	6.07412	0.0197004	0.509232	-0.157345	8.87416	9.50811	0.00438196	0.0419315	535.638	437.9	0.290655	10.8055	7.4336e-08	1.70619e-06
Ppp1r1a|ENSMUSG00000022490	-0.135979	6.58288	4.32424	0.0462669	0.654264	0.322022	6.58324	27.6163	1.15464e-05	0.000395826	87.8123	100.261	-0.191261	-5.52687	5.05146e-05	0.000332547
Ppp1r1b|ENSMUSG00000061718	-0.275833	10.6063	27.9469	1.05398e-05	0.0138955	0.315327	10.6066	41.2946	4.39534e-07	2.67695e-05	1519.52	1567.7	-0.045033	-1.89726	0.074958	0.136011
Ppp1r3e|ENSMUSG00000072494	0.31135	2.7287	4.21536	0.0489184	0.669366	-0.230318	2.72893	2.51898	0.123038	0.384351	6.0337	6.50477	-0.108454	-1.15135	0.271544	0.380324
Ppp3ca|ENSMUSG00000028161	-0.149044	10.7124	9.83602	0.00382888	0.256884	-0.0747957	10.7124	2.89782	0.0991095	0.338138	1843.4	1574.4	0.227565	10.4051	4.32108e-08	1.12245e-06
Ppp3r1|ENSMUSG00000033953	-0.117057	10.3002	5.4784	0.026133	0.550333	-0.152724	10.3002	11.3661	0.00208527	0.024314	1418.57	1174.04	0.272948	12.3015	1.72396e-07	3.31643e-06
Ppp4r4|ENSMUSG00000021209	-0.232885	6.63482	21.3642	6.83346e-05	0.0344467	-0.104453	6.63492	4.94496	0.0338949	0.173982	113.661	90.0238	0.336362	14.063	9.49432e-11	1.33939e-08
Pqlc2|ENSMUSG00000028744	0.189678	3.07887	10.7526	0.0381706	0.614628	0.0790356	3.07898	2.16029	0.353742	0.665518	7.23595	8.76588	-0.276717	-11.3376	2.65886e-09	1.46931e-07
Prdx5|ENSMUSG00000024953	-0.126974	6.83657	10.5324	0.00531161	0.289475	-0.0437047	6.83657	1.46072	0.303357	0.617756	123.319	109.836	0.167045	6.91951	2.86595e-06	3.24608e-05
Prickle2|ENSMUSG00000030020	0.149245	7.67552	13.0552	0.00109805	0.1389	-0.0287696	7.6754	0.534667	0.49395	0.771904	190.9	209.314	-0.132855	-5.86881	0.000112878	0.000652888
Prima1|ENSMUSG00000041669	-0.209631	4.15989	5.35251	0.0277688	0.56264	0.0764888	4.16004	0.837424	0.36748	0.678372	19.0275	17.3243	0.135284	2.76728	0.0133962	0.0334914
Prkaa1|ENSMUSG00000050697	-0.104051	5.65658	7.58714	0.0438333	0.638081	-0.0188344	5.65643	0.289801	0.697045	0.885026	53.301	49.092	0.118673	5.40005	5.47535e-05	0.000356236
Prkab2|ENSMUSG00000038205	0.132937	5.94743	7.54136	0.0101187	0.390595	-0.00487145	5.94744	0.0112937	0.916079	0.972534	57.8593	63.4126	-0.132222	-5.84481	2.60921e-05	0.000193318
Prkar1b|ENSMUSG00000025855	0.146354	8.54757	14.5338	0.00104102	0.137246	-0.056787	8.54751	2.43618	0.177121	0.470615	352.864	377.405	-0.0970013	-3.50244	0.0040119	0.0123037
Prkar2b|ENSMUSG00000002997	-0.0932712	7.69139	8.31916	0.0366151	0.611985	-0.0201305	7.69133	0.441663	0.628869	0.849472	214.868	198.638	0.113307	6.7733	3.40633e-06	3.70238e-05
Prkcb|ENSMUSG00000052889	-0.156974	9.54727	6.28431	0.0178626	0.504255	-0.142728	9.54733	6.01757	0.0202361	0.123377	843.563	686.891	0.296414	9.77059	3.96235e-08	1.06374e-06
Prkci|ENSMUSG00000037643	-0.108447	6.69129	5.81658	0.0222394	0.524931	0.121389	6.69136	8.10144	0.00792817	0.063988	103.298	104.309	-0.014045	-0.557416	0.58451	0.682899
Prkdc|ENSMUSG00000022672	0.120014	5.92907	5.62965	0.0243063	0.541723	0.0539319	5.92906	1.29794	0.263664	0.577675	55.7341	63.081	-0.178646	-9.48114	5.99287e-08	1.4364e-06
Prkg1|ENSMUSG00000052920	0.304979	1.92938	4.63629	0.0395111	0.618556	-0.438186	1.92937	11.1806	0.00224146	0.0255456	3.76515	3.37271	0.158802	1.60784	0.13606	0.220523
Prnp|ENSMUSG00000079037	0.109411	9.0826	16.1611	0.0160453	0.492831	0.0614471	9.08259	6.05072	0.151896	0.430143	500.187	562.834	-0.17024	-15.9134	2.01424e-11	4.36889e-09
Prr12|ENSMUSG00000046574	0.0954623	5.97242	4.40457	0.0493382	0.66942	-0.0828312	5.97249	3.57461	0.0692699	0.273778	61.1126	61.4748	-0.00852484	-0.310756	0.760602	0.826275
Prrg3|ENSMUSG00000033361	0.206248	5.06653	14.5581	0.000636544	0.111017	0.0152426	5.06654	0.0894872	0.780123	0.920297	29.4029	34.3302	-0.223521	-5.85057	2.27773e-05	0.000173271
Prss12|ENSMUSG00000027978	-0.624521	1.04313	4.22766	0.0486106	0.667577	0.395915	1.0433	1.8291	0.186407	0.483473	2.15319	1.99287	0.111626	0.574467	0.574944	0.675223
Prss41|ENSMUSG00000024114	-1.11201	0.647804	22.2851	5.18222e-05	0.029606	0.466334	0.647614	4.37503	0.0450939	0.209544	2.05916	1.46929	0.486935	3.78278	0.00161888	0.00579432
Prss45|ENSMUSG00000047257	-1.01685	-1.14661	4.73926	0.0375277	0.614628	0.993864	-1.14663	5.26133	0.0290314	0.156895	0.577947	0.516775	0.161402	0.563628	0.580444	0.679684
Prss56|ENSMUSG00000036480	0.673712	1.41572	8.44357	0.00684143	0.316052	-0.429048	1.41561	4.23258	0.0484973	0.219352	2.33809	2.60851	-0.157892	-0.797585	0.442726	0.556236
Psme1|ENSMUSG00000022216	0.151234	4.46677	4.94889	0.033821	0.596971	0.232437	4.46679	13.2136	0.00103677	0.0143369	18.4501	24.1344	-0.387465	-10.9733	1.98149e-08	6.29723e-07
Ptges3|ENSMUSG00000071072	0.108877	5.56716	7.24758	0.0380698	0.614628	0.145152	5.56717	15.3107	0.00300211	0.0316715	42.6239	50.7586	-0.251989	-10.5994	7.02901e-09	2.91092e-07
Ptk7|ENSMUSG00000023972	-0.160902	3.8035	4.8614	0.0380981	0.614628	0.0247307	3.8037	0.129338	0.732886	0.90109	14.7294	13.3766	0.138989	3.93873	0.00105923	0.00411181
Ptp4a2|ENSMUSG00000028788	-0.102297	7.51574	6.6238	0.0229617	0.530091	0.0967488	7.51577	6.79962	0.0216275	0.128575	185.477	184.563	0.007125	0.316628	0.756144	0.822919
Ptpn5|ENSMUSG00000030854	-0.169616	9.60717	7.72198	0.00934642	0.375148	-0.246207	9.60717	18.7803	0.000153272	0.00318192	938.907	698.201	0.427339	13.089	9.69885e-09	3.64274e-07
Ptpn7|ENSMUSG00000031506	-0.333597	3.20565	6.30724	0.0176738	0.503636	-1.28108	3.20535	107.07	2.21305e-11	9.50229e-09	15.9805	5.4382	1.55511	21.0879	5.17052e-09	2.2946e-07
Ptprh|ENSMUSG00000035429	0.554401	1.66934	24.5152	7.31583e-05	0.0352509	0.412756	1.66939	16.1808	0.00110833	0.0150718	1.93476	3.8278	-0.984362	-10.6031	1.64859e-08	5.45924e-07
Ptpro|ENSMUSG00000030223	0.179325	5.85148	20.4609	0.000381184	0.0808504	0.472848	5.8515	162.663	1.32878e-13	1.93383e-10	42.3042	67.6467	-0.677218	-27.3759	6.3759e-11	1.03397e-08
Ptprs|ENSMUSG00000013236	0.0977316	7.96467	5.76078	0.0280811	0.56264	0.0830948	7.96481	4.45769	0.0478723	0.21717	227.896	257.874	-0.178295	-6.30433	1.39816e-05	0.000116863
Ptprt|ENSMUSG00000053141	0.109886	7.37032	6.61324	0.0153513	0.482764	0.068963	7.37042	2.86436	0.10179	0.343805	149.971	170.658	-0.186429	-7.56636	2.63613e-06	3.03531e-05
Ptprv|ENSMUSG00000097993	-0.443188	4.72421	26.9081	1.39368e-05	0.015595	-1.05462	4.72409	172.725	6.19202e-14	1.36891e-10	45.0144	16.6566	1.43429	19.7575	7.59556e-10	5.78062e-08
Pxdn|ENSMUSG00000020674	-0.224665	6.8432	17.1647	0.000259532	0.0663898	-0.168391	6.84321	11.4433	0.00202372	0.023709	137.473	104.23	0.399388	11.9469	1.29143e-08	4.52706e-07
Pxk|ENSMUSG00000033885	0.131297	4.7551	5.55106	0.0377481	0.614628	0.0262659	4.75506	0.259949	0.658351	0.864926	25.0052	28.0006	-0.163229	-4.75921	0.000284734	0.00139528
Pygo1|ENSMUSG00000034910	0.150191	5.52814	12.5425	0.00426809	0.269929	0.0519963	5.52813	1.77881	0.286868	0.601546	41.8513	48.0052	-0.197916	-8.99376	7.17456e-08	1.65991e-06
Rab3b|ENSMUSG00000003411	0.176813	5.51071	5.19361	0.0299961	0.575066	0.46197	5.5108	40.8253	4.86171e-07	2.91958e-05	34.3333	52.8441	-0.622135	-14.1708	7.60745e-11	1.14786e-08
Rab3ip|ENSMUSG00000064181	-0.136111	5.17361	7.37517	0.0172764	0.500628	0.146275	5.17373	9.55565	0.00614919	0.0534746	36.4566	36.7515	-0.0116235	-0.466658	0.64667	0.734359
Rab6a|ENSMUSG00000030704	0.109881	6.69778	8.2707	0.0158581	0.490598	-0.0878361	6.6977	6.17376	0.0387309	0.189355	100.479	102.384	-0.0270986	-1.43992	0.16875	0.261536
Rab9b|ENSMUSG00000043463	0.12906	5.40998	6.26158	0.0180521	0.505157	0.0486127	5.40984	0.970722	0.332431	0.644839	38.1926	43.8897	-0.200591	-6.44425	1.33981e-05	0.000113131
Rad54b|ENSMUSG00000078773	-0.256435	3.29129	7.7647	0.00917324	0.371679	-0.343181	3.29115	16.7358	0.000300079	0.00541372	12.3564	8.26516	0.580141	10.8449	2.24113e-08	6.91959e-07
Ralgps2|ENSMUSG00000026594	-0.110282	6.11541	8.36409	0.0219196	0.521742	-0.0321619	6.11538	0.806101	0.475527	0.758679	74.3754	67.3268	0.143645	5.51266	0.000165541	0.000894294
Raly|ENSMUSG00000027593	-0.116921	6.35639	9.03569	0.0135076	0.452637	-0.0289262	6.35639	0.655261	0.511994	0.783565	86.5681	78.3472	0.143954	7.56619	3.64214e-06	3.90837e-05
Rap2b|ENSMUSG00000036894	0.0914687	6.43504	6.90945	0.0491747	0.669366	0.0552254	6.43499	2.83571	0.205721	0.509261	79.9373	88.8562	-0.152603	-7.25517	4.49053e-06	4.62205e-05
Raph1|ENSMUSG00000026014	0.192202	2.87208	5.26511	0.045371	0.648011	-0.0689442	2.8721	0.788912	0.439849	0.735281	6.69793	7.35297	-0.134612	-3.02133	0.00771164	0.0212165
Rarb|ENSMUSG00000017491	-0.130922	7.35983	5.38428	0.0273457	0.559727	-0.227914	7.35977	18.6473	0.000159962	0.00327454	190.398	147.513	0.368179	10.4822	9.6287e-09	3.63544e-07
Rasgef1a|ENSMUSG00000030134	-0.123355	8.73672	8.96596	0.00626035	0.30456	-0.135826	8.73681	12.0992	0.00157332	0.0196453	474.476	396.665	0.258417	12.8892	3.54194e-10	3.39557e-08
Rasgef1b|ENSMUSG00000029333	-0.219735	6.84955	13.7683	0.000845444	0.128231	-0.167778	6.84939	9.40522	0.00457183	0.0432386	137.756	105.339	0.387073	12.3667	7.74893e-10	5.82075e-08
Rasgrp2|ENSMUSG00000032946	-0.20117	8.07018	15.5458	0.00044998	0.091812	-0.187206	8.07025	15.3781	0.000477608	0.00780487	317.823	243.747	0.382835	14.3237	4.89121e-09	2.20448e-07
Rassf3|ENSMUSG00000025795	-0.129335	5.40713	5.58569	0.0248223	0.544738	0.242545	5.40734	22.2583	5.23516e-05	0.00135006	40.7614	43.7798	-0.103059	-2.58872	0.0220166	0.0501223
Rbbp7|ENSMUSG00000031353	-0.0944344	6.94618	5.67768	0.03717	0.612374	0.096378	6.94619	6.84001	0.0228164	0.133245	124.304	124.574	-0.00313098	-0.115972	0.910146	0.93776
Rbm38|ENSMUSG00000027510	0.38948	1.00535	5.51979	0.0256187	0.550333	0.492547	1.00552	10.4513	0.00298966	0.0315984	1.24578	2.27903	-0.871374	-10.0352	1.57244e-08	5.26735e-07
Rbp1|ENSMUSG00000046402	-0.147398	4.01673	4.61651	0.0467387	0.65612	0.000604106	4.0167	8.77009e-05	0.993099	0.997739	17.1774	15.5319	0.145277	2.97179	0.00995937	0.0261208
Rbp4|ENSMUSG00000024990	-0.447501	4.10848	16.2189	0.000356996	0.0785836	0.466663	4.10892	19.733	0.000113272	0.00252001	16.5581	16.9992	-0.0379291	-0.492286	0.629112	0.720171
Rdh10|ENSMUSG00000025921	0.189	3.29121	7.04031	0.0287629	0.563902	-0.0132537	3.29114	0.0397874	0.869776	0.956289	8.81439	9.98079	-0.179294	-3.85847	0.00177413	0.00624689
Rdh12|ENSMUSG00000021123	0.469207	1.62308	11.539	0.00194847	0.182802	0.269068	1.62303	4.37036	0.0452013	0.209743	2.0119	3.49713	-0.797612	-9.22012	6.33693e-08	1.49807e-06
Reln|ENSMUSG00000042453	-0.152477	7.91318	6.17305	0.0188109	0.508495	-0.111288	7.91316	3.779	0.0613936	0.252559	269.488	224.209	0.265373	6.38565	1.14991e-05	0.000100368
Relt|ENSMUSG00000008318	0.207178	3.17545	5.74747	0.0229802	0.530091	-0.0900563	3.1754	1.24247	0.277594	0.592496	8.32663	9.10281	-0.12858	-1.95717	0.0691939	0.127597
Rerg|ENSMUSG00000030222	-0.165768	5.29552	9.19534	0.00498418	0.283921	0.317619	5.2956	41.3776	4.31794e-07	2.63917e-05	37.4307	41.4096	-0.145744	-4.94209	0.00014515	0.000803393
Rfc5|ENSMUSG00000029363	-0.189717	2.97143	6.63157	0.042139	0.631654	-0.207486	2.97149	8.93818	0.0181776	0.114643	9.03037	6.85259	0.398137	8.4553	7.26091e-07	1.06954e-05
Rgl2|ENSMUSG00000041354	0.137599	4.94386	7.68699	0.023628	0.534826	0.0489835	4.94396	1.12701	0.389302	0.697212	28.6233	32.4083	-0.179172	-6.01069	1.53165e-05	0.000125943
Rgs14|ENSMUSG00000052087	-0.285843	5.9489	10.239	0.00325277	0.230369	-0.661876	5.94878	62.5148	8.36437e-09	1.09663e-06	89.4467	45.1506	0.986283	17.434	5.43019e-10	4.48689e-08
Rgs19|ENSMUSG00000002458	0.223349	3.78169	6.81977	0.0139729	0.457799	0.638647	3.7819	65.8431	4.8973e-09	7.12805e-07	9.38115	16.5908	-0.822552	-15.6871	2.39224e-11	4.82677e-09
Rgs4|ENSMUSG00000038530	-0.309822	10.1032	9.62416	0.00417519	0.26885	0.0324688	10.1034	0.128158	0.722873	0.896821	1243.09	1031.8	0.268765	5.53105	0.000149891	0.000823591
Rgs9|ENSMUSG00000020599	-0.264849	9.64336	24.8957	2.43264e-05	0.0189514	0.0920303	9.64357	3.4377	0.0736448	0.283789	857.868	766.382	0.162692	4.62511	0.000325606	0.00156811
Rhoq|ENSMUSG00000024143	-0.102311	6.00808	5.18629	0.0340253	0.597761	-0.0904534	6.00805	4.54344	0.0460852	0.212259	70.5135	61.6941	0.192765	7.80476	1.76825e-06	2.19475e-05
Rin1|ENSMUSG00000024883	-0.141387	6.51306	11.6612	0.00222962	0.194967	-0.223634	6.51304	32.2032	3.55005e-06	0.000153582	106.091	82.7383	0.358668	16.2396	1.14815e-11	2.97355e-09
Riok3|ENSMUSG00000024404	-0.252475	6.33507	14.3252	0.000691669	0.116221	0.189274	6.33504	9.27089	0.00483321	0.0447979	85.3272	82.1508	0.054731	1.13328	0.280727	0.3906
Rmnd5b|ENSMUSG00000001054	-0.139514	5.38556	8.1751	0.0100856	0.390595	-0.263575	5.38552	32.5326	3.27345e-06	0.000143789	49.2053	37.2804	0.400396	17.4722	2.31622e-11	4.81635e-09
Rn7sk|ENSMUSG00000065037	-1.62794	0.905831	8.6492	0.00626855	0.30456	0.0605015	0.906275	0.0131394	0.909509	0.969695	3.41284	1.04356	1.70946	2.97243	0.0145138	0.0357225
Rnasel|ENSMUSG00000066800	0.274138	1.95377	6.85292	0.025418	0.548041	-0.205456	1.95366	4.52321	0.0691718	0.273549	3.59175	3.75492	-0.0640924	-1.03944	0.313187	0.425878
Rnf144a|ENSMUSG00000020642	-0.21409	5.72652	5.75736	0.0228725	0.529746	-0.232104	5.72641	8.01335	0.00823614	0.0658484	63.9785	46.6307	0.456307	6.32107	0.000162462	0.000880951
Rnf149|ENSMUSG00000048234	-0.191557	4.97908	9.83082	0.00383699	0.256884	-0.0980948	4.97905	2.97137	0.0951107	0.330005	35.4869	29.0803	0.28724	7.79202	1.52327e-06	1.94351e-05
Rnf169|ENSMUSG00000058761	0.332688	5.76487	9.06283	0.00526724	0.288419	-0.155346	5.765	2.20458	0.148102	0.426197	47.8834	54.0383	-0.174458	-2.15279	0.0547606	0.105755
Rnps1|ENSMUSG00000034681	0.348284	5.30523	16.2761	0.000350107	0.0785836	-0.120685	5.30532	2.31452	0.13871	0.411176	35.4289	41.5102	-0.228542	-3.48121	0.00473703	0.0141305
RP23-242C19.7|ENSMUSG00000098650	-0.226468	7.24761	20.0027	0.000103898	0.0441088	0.104719	7.24778	5.03969	0.0323506	0.168419	163.513	150.498	0.119661	4.71854	0.000275936	0.00135869
RP23-2C22.1|ENSMUSG00000098506	0.298761	1.30581	4.20761	0.0491135	0.669366	-0.274459	1.30563	4.06855	0.0527748	0.230814	2.31608	2.38595	-0.0428794	-0.487864	0.637106	0.726446
RP24-113D21.1|ENSMUSG00000098495	-0.456964	0.814585	7.34944	0.011016	0.406117	0.586674	0.814781	13.7477	0.000852755	0.0122973	1.68283	1.8147	-0.108836	-1.24511	0.231286	0.334945
Rph3a|ENSMUSG00000029608	0.140196	8.17534	8.99044	0.00542919	0.290784	0.235234	8.17558	28.1587	9.9925e-06	0.000352405	244.388	318.072	-0.380178	-10.739	2.1499e-08	6.70164e-07
Rph3al|ENSMUSG00000020847	0.364941	0.61834	5.01501	0.045746	0.650099	0.17124	0.618265	1.29777	0.310025	0.624669	1.10043	1.612	-0.550785	-5.32536	0.000151001	0.000828118
Rpl11|ENSMUSG00000059291	-0.247543	2.88928	7.9167	0.0102632	0.394329	0.110581	2.88931	1.83065	0.216201	0.521823	7.88487	7.21201	0.128685	2.57444	0.0199016	0.0462178
Rpl29|ENSMUSG00000048758	0.699475	5.59657	4.34939	0.0456775	0.650099	-0.697566	5.59657	4.89754	0.0346983	0.176733	43.2864	43.5027	-0.00719151	-0.0636275	0.950235	0.964916
Rpl31-ps10|ENSMUSG00000070667	-1.05269	-1.53976	9.2214	0.00493046	0.283567	0.226792	-1.5399	0.439585	0.512418	0.783836	0.482046	0.283728	0.76466	3.3791	0.0071536	0.0199148
Rprm|ENSMUSG00000075334	0.592679	2.60402	17.4864	0.000233238	0.0634519	-0.0307887	2.60358	0.0526248	0.820124	0.93695	4.14108	6.79375	-0.714201	-5.27574	7.02335e-05	0.000437748
Rps15a-ps4|ENSMUSG00000083757	-0.402313	0.963943	6.55655	0.0157552	0.490598	0.192406	0.964095	1.77565	0.201169	0.504391	2.10942	1.87988	0.166207	1.5786	0.136134	0.220601
Rps18|ENSMUSG00000008668	0.406136	4.76416	19.1604	0.000135499	0.0504851	-0.0686097	4.76408	0.637137	0.431064	0.728765	24.4245	29.0555	-0.250478	-4.53301	0.000658257	0.00279816
Rps2-ps13|ENSMUSG00000081684	-4.35701	4.63357	28.6857	8.66837e-06	0.0123806	0.491097	4.63283	0.328169	0.571036	0.81795	42.7209	15.5044	1.46226	3.46474	0.00568016	0.0164875
Rps2|ENSMUSG00000044533	0.713765	4.74066	12.275	0.00147046	0.161553	-0.230515	4.74096	1.61382	0.213784	0.5189	21.1045	29.8449	-0.499934	-3.24915	0.00906715	0.0242062
Rps24-ps3|ENSMUSG00000081049	-0.174449	4.60627	4.51851	0.0419232	0.631654	0.142466	4.60634	3.42992	0.0739542	0.284344	24.7185	24.2809	0.0257684	0.38897	0.705579	0.781963
Rps27a-ps2|ENSMUSG00000058838	-0.436171	1.08229	9.11955	0.00542099	0.290784	0.284915	1.08238	4.39994	0.0511231	0.227001	2.26975	2.07348	0.130484	1.51651	0.152189	0.241433
Rps3a3|ENSMUSG00000059751	-0.560083	4.45879	4.60198	0.0401975	0.62067	0.320988	4.45867	1.75807	0.194938	0.495202	27.8114	23.8506	0.221646	0.704344	0.492515	0.603539
Rps6ka4|ENSMUSG00000024952	-0.223189	5.72002	10.9531	0.00244856	0.202734	-0.31829	5.72004	24.9691	2.38886e-05	0.000723609	65.2595	45.3026	0.526593	19.2485	1.65502e-10	2.02039e-08
Rps6ka5|ENSMUSG00000021180	-0.278139	6.59864	13.4118	0.000962899	0.133384	0.174261	6.59872	6.23451	0.0182868	0.11503	101.517	94.6162	0.101568	1.97161	0.0698461	0.128536
Rps6kl1|ENSMUSG00000019235	-0.162135	4.96747	6.7729	0.0142734	0.461174	-0.0560403	4.96757	0.891354	0.352702	0.6645	34.2378	29.6007	0.209961	5.55182	4.67094e-05	0.000311971
Rspo1|ENSMUSG00000028871	-0.290417	3.04999	5.04986	0.0321814	0.583701	0.681096	3.05059	29.9661	6.23552e-06	0.000236936	6.60883	8.96842	-0.440458	-3.7329	0.00187139	0.00653631
Rsu1|ENSMUSG00000026727	0.138311	4.52273	7.74245	0.0391777	0.617158	0.0321947	4.52276	0.491974	0.607397	0.83762	21.0319	23.6705	-0.170513	-7.47496	1.2016e-06	1.59649e-05
Rxrg|ENSMUSG00000015843	-0.224331	7.64028	7.65577	0.00962183	0.382993	-0.125255	7.6404	2.72847	0.109073	0.359702	236.467	185.816	0.347769	7.48829	4.55929e-05	0.000305809
Ryr1|ENSMUSG00000030592	-0.450092	6.9727	12.3743	0.00141627	0.158521	-0.0209577	6.97314	0.0296725	0.8644	0.953762	149.77	113.956	0.394271	4.67222	0.000530354	0.00235183
Ryr2|ENSMUSG00000021313	-0.125817	7.12618	4.40948	0.0443023	0.640359	0.109921	7.12629	3.8976	0.0576862	0.243941	143.315	142.322	0.0100286	0.274691	0.787645	0.846712
S100a3|ENSMUSG00000001021	-0.504218	0.0995927	6.33708	0.0174313	0.500628	0.366845	0.0997881	3.72682	0.0642946	0.260699	1.07937	0.999307	0.111188	0.851774	0.406673	0.520821
Samd1|ENSMUSG00000079003	-0.191868	4.38064	9.41233	0.00525927	0.288419	-0.0293629	4.38074	0.247512	0.649289	0.859994	22.7959	19.6691	0.212841	6.88195	2.99624e-06	3.3456e-05
Sap130|ENSMUSG00000024260	0.118029	5.45891	5.38676	0.0273129	0.559727	-0.037177	5.45894	0.607874	0.457187	0.74598	41.4628	43.9257	-0.0832489	-2.64198	0.0200486	0.0464765
Satb1|ENSMUSG00000023927	0.191538	4.9079	6.52146	0.0160109	0.492658	0.177966	4.90789	6.62594	0.0152682	0.101638	24.677	32.8152	-0.411199	-5.9021	0.00020795	0.00107567
Sbsn|ENSMUSG00000046056	-0.307738	4.44581	19.538	0.000120218	0.0468276	-0.222036	4.44592	11.5508	0.00194129	0.0229665	26.8108	18.7848	0.513244	15.4117	8.37478e-11	1.22117e-08
Scaf1|ENSMUSG00000038406	0.0991907	6.91745	8.24487	0.0282259	0.56264	-0.108217	6.91752	10.6692	0.010666	0.0791998	120.567	119.743	0.00988761	0.468861	0.647929	0.735405
Scg2|ENSMUSG00000050711	0.14546	8.79883	4.65762	0.039091	0.616534	0.0548475	8.79876	0.746291	0.394553	0.70173	406.973	472.07	-0.214069	-4.72432	0.000229286	0.00116857
Scml4|ENSMUSG00000044770	0.602712	-0.852657	4.88739	0.0348647	0.599344	0.00610553	-0.852767	0.000619201	0.980314	0.994507	0.368635	0.558683	-0.599839	-3.66724	0.00285952	0.00926407
Scn1b|ENSMUSG00000019194	-0.137871	7.15946	10.9022	0.00249808	0.204026	-0.0104938	7.15953	0.0720258	0.802994	0.929868	151.687	138.694	0.129187	6.21311	0.000151191	0.000828376
Scn3b|ENSMUSG00000049281	0.177767	6.27727	11.9798	0.00164498	0.166824	-0.151429	6.27712	9.98806	0.00360204	0.0363057	76.0791	77.7209	-0.0308022	-0.915219	0.375682	0.490728
Scn4b|ENSMUSG00000046480	-0.353658	10.9818	12.145	0.00154475	0.16185	-0.251086	10.9819	7.21144	0.0117194	0.0845009	2559.82	1699.74	0.590729	15.9739	4.69105e-09	2.16982e-07
Scn5a|ENSMUSG00000032511	0.291948	2.35398	5.42872	0.0267656	0.554028	0.982621	2.35452	73.4366	1.54532e-09	3.01601e-07	2.75276	6.93752	-1.33354	-11.8375	2.02341e-09	1.1983e-07
Scn9a|ENSMUSG00000075316	0.496947	3.843	18.6852	0.000157752	0.0530141	0.142789	3.843	1.66012	0.2075	0.512047	10.6016	16.4101	-0.63031	-8.49765	3.27573e-06	3.59501e-05
Scube2|ENSMUSG00000007279	-0.703355	-0.91229	7.9278	0.0108945	0.403285	0.611171	-0.912137	6.7455	0.0190539	0.118551	0.523243	0.493958	0.0830939	0.675934	0.509253	0.618546
Scube3|ENSMUSG00000038677	-0.186468	5.18524	8.18608	0.00764001	0.334504	-0.00453159	5.18537	0.00567833	0.940436	0.980973	39.7406	34.842	0.189783	3.85582	0.00313821	0.010021
Sec14l1|ENSMUSG00000020823	-0.100174	8.41541	5.22937	0.0294783	0.569592	-0.234182	8.41542	31.8622	3.86298e-06	0.000163819	393.55	310.963	0.339802	19.382	1.10835e-08	4.04035e-07
Sec14l3|ENSMUSG00000054986	-0.526092	1.57504	8.79974	0.00588212	0.302744	-0.574323	1.57532	11.5838	0.00191673	0.0227819	4.26243	2.03169	1.06899	9.82377	1.37695e-07	2.75263e-06
Sec31b|ENSMUSG00000051984	-0.741818	-1.65674	6.08434	0.0196064	0.509232	-0.00185938	-1.65679	4.39727e-05	0.994753	0.998241	0.403361	0.238068	0.760699	5.78945	0.000111446	0.000645252
Selm|ENSMUSG00000075702	-0.188121	5.67795	13.96	0.000788729	0.124459	-0.192243	5.67797	16.6952	0.000304207	0.00547668	59.8223	46.6647	0.358352	11.5983	4.95917e-09	2.22932e-07
Sema3a|ENSMUSG00000028883	0.16501	5.55107	5.13283	0.0308996	0.577846	0.195419	5.55095	8.22926	0.00750327	0.0615418	38.9382	50.2587	-0.368185	-7.10224	3.84008e-06	4.06879e-05
Sema6c|ENSMUSG00000038777	0.254705	2.68212	8.10928	0.0131123	0.446782	0.290617	2.68222	12.1574	0.00236329	0.0265868	5.0994	7.34403	-0.526244	-9.29265	8.09683e-08	1.82226e-06
Sema7a|ENSMUSG00000038264	-0.220117	6.9008	6.98358	0.0129753	0.445087	-0.22166	6.90076	8.51435	0.00664176	0.0565554	144.47	107.689	0.4239	8.31533	8.33878e-06	7.70061e-05
Sept11|ENSMUSG00000058013	-0.0929347	6.8585	7.50328	0.0407056	0.623461	-0.0558241	6.85855	3.00241	0.189477	0.488041	123.424	111.145	0.151183	8.58456	2.07775e-07	3.85594e-06
Sept7|ENSMUSG00000001833	-0.09949	8.72233	6.53992	0.0282303	0.56264	0.0315764	8.72229	0.776629	0.458738	0.747017	433.437	414.393	0.0648221	3.02532	0.0076742	0.0211302
Serpinb1b|ENSMUSG00000051029	-0.484124	1.52731	13.4057	0.000965031	0.133384	-1.17069	1.52697	85.9379	2.75891e-10	7.17943e-08	5.356	1.6225	1.72294	14.5928	2.12631e-07	3.93764e-06
Serpinh1|ENSMUSG00000070436	0.170461	3.63395	4.66163	0.0390124	0.616509	0.0483945	3.63413	0.431695	0.523577	0.790594	11.011	12.933	-0.2321	-4.18675	0.00176968	0.00623501
Sestd1|ENSMUSG00000042272	0.145066	5.60495	10.1484	0.00499857	0.283921	-0.0522176	5.60489	1.46717	0.28005	0.59528	45.5445	48.7604	-0.0984315	-3.06735	0.0100445	0.0262923
Setmar|ENSMUSG00000034639	-0.31817	1.09077	4.92368	0.0449915	0.644201	0.304875	1.09071	5.37134	0.0362542	0.181482	2.14343	2.1861	-0.028441	-0.322067	0.751665	0.819432
Sez6|ENSMUSG00000000632	-0.136061	9.28863	9.10881	0.00516711	0.287551	0.179319	9.28882	17.0093	0.000273771	0.00501282	605.542	626.584	-0.0492803	-1.70863	0.105875	0.17969
Sfmbt2|ENSMUSG00000061186	0.419388	2.69627	9.22619	0.00492066	0.283567	0.945643	2.69653	56.0377	2.51459e-08	2.71623e-06	3.12271	8.78786	-1.49271	-15.9627	1.9254e-10	2.24225e-08
Sh2d5|ENSMUSG00000045349	-0.186754	6.11624	9.36047	0.0046542	0.27891	-0.368846	6.11616	40.1399	5.64033e-07	3.30624e-05	87.9622	58.8709	0.57933	13.9312	9.026e-10	6.49872e-08
Sh3bgrl|ENSMUSG00000031246	0.143123	6.94611	24.7408	0.00154225	0.16185	0.126288	6.94601	23.3086	0.00289642	0.0308598	108.465	131.777	-0.280865	-18.8219	1.27538e-12	7.87169e-10
Sh3rf2|ENSMUSG00000057719	-0.159646	5.48861	6.46488	0.0164328	0.498337	-0.156244	5.48864	7.13681	0.0121172	0.0865335	52.6075	41.8095	0.331437	5.71163	0.000264033	0.00131087
Sh3yl1|ENSMUSG00000020669	0.297451	2.44722	8.88296	0.00607097	0.30456	-0.07051	2.44709	0.577893	0.481929	0.763013	4.76846	5.68111	-0.252651	-5.10451	9.35271e-05	0.000555401
Shank2|ENSMUSG00000037541	0.149863	5.34616	5.06606	0.0319266	0.583182	-0.135208	5.3462	4.72543	0.0377961	0.186269	39.818	40.1212	-0.010943	-0.342317	0.736902	0.806785
Shh|ENSMUSG00000002633	-0.383451	1.67867	5.18396	0.0301376	0.575172	0.281146	1.67866	3.14557	0.0863532	0.312266	3.51277	3.21109	0.129546	1.1645	0.269595	0.378143
Shisa2|ENSMUSG00000044461	-0.451159	3.95664	9.29727	0.00477761	0.282357	0.730747	3.95718	26.2035	1.69426e-05	0.000543905	13.4147	17.347	-0.370874	-2.64881	0.0195941	0.0456575
Siah3|ENSMUSG00000091722	0.642378	-0.322371	10.5623	0.00722601	0.324206	0.334684	-0.32238	3.61454	0.116005	0.372326	0.48996	0.935677	-0.933347	-8.91498	3.16728e-07	5.41465e-06
Sik1|ENSMUSG00000024042	-0.442039	4.16912	9.50721	0.00438073	0.270077	0.519674	4.16934	15.0873	0.000528689	0.00843302	18.3399	18.883	-0.0421055	-0.371056	0.717779	0.791085
Sipa1l3|ENSMUSG00000030583	-0.114307	6.39459	6.27078	0.0179751	0.504255	-0.219351	6.39462	25.914	1.8351e-05	0.000583599	95.6696	76.1612	0.329005	10.697	6.82732e-09	2.85464e-07
Six3|ENSMUSG00000038805	0.0965649	5.92806	4.80502	0.0498386	0.66942	0.0221093	5.92805	0.283794	0.629152	0.849504	57.6756	62.6427	-0.119187	-5.87531	2.00409e-05	0.000156292
Slc14a1|ENSMUSG00000059336	-0.217179	3.40223	5.84688	0.0219229	0.521742	0.0484878	3.40212	0.332333	0.568617	0.816516	11.4648	10.2432	0.162544	3.42749	0.00342922	0.0107758
Slc16a11|ENSMUSG00000040938	0.190799	2.97151	5.22161	0.0429167	0.633549	-0.138128	2.97138	3.13293	0.115841	0.372272	7.58897	7.81665	-0.0426467	-0.835452	0.418292	0.532165
Slc16a14|ENSMUSG00000026220	0.415619	2.12842	16.7887	0.000610005	0.111017	0.371463	2.12849	16.6421	0.00065661	0.00996227	3.07692	5.20094	-0.757284	-11.3557	2.72189e-09	1.48057e-07
Slc16a6|ENSMUSG00000041920	-0.219881	5.22643	10.7377	0.00266581	0.212448	-0.00576898	5.22653	0.00852642	0.927047	0.976155	41.5841	35.5531	0.226054	5.20337	0.000141912	0.00078849
Slc17a5|ENSMUSG00000049624	0.155942	3.72086	6.52181	0.0496538	0.66942	-0.00196765	3.72075	0.00121294	0.978724	0.994248	12.202	13.5287	-0.148907	-4.30363	0.000536903	0.00237722
Slc17a7|ENSMUSG00000070570	-0.699696	5.04412	6.41501	0.0168148	0.498773	0.201436	5.0439	0.585236	0.450283	0.741783	26.1842	34.1268	-0.382205	-1.46155	0.172221	0.265776
Slc17a9|ENSMUSG00000023393	-0.753183	-1.61184	5.8644	0.0217421	0.521742	0.0597699	-1.61189	0.0387438	0.845293	0.946248	0.400055	0.25882	0.62825	4.37774	0.00041054	0.00191497
Slc22a17|ENSMUSG00000022199	0.0950788	8.79552	7.88813	0.0349825	0.599971	0.0117756	8.79554	0.133991	0.781894	0.921078	421.705	453.586	-0.105143	-5.1206	0.000144416	0.000799844
Slc25a25|ENSMUSG00000026819	-0.184504	6.26339	6.75124	0.0144147	0.463515	-0.054065	6.26361	0.655451	0.424587	0.723011	85.0997	71.7493	0.24619	5.8008	5.41595e-05	0.000352901
Slc26a10|ENSMUSG00000040441	-0.203004	2.80847	5.8999	0.0383143	0.615196	-0.367354	2.80852	21.4851	6.6015e-05	0.00163138	8.91893	6.04665	0.560734	10.4964	7.38712e-07	1.08261e-05
Slc26a5|ENSMUSG00000029015	-0.46847	1.10944	14.7825	0.00254852	0.206033	-0.133787	1.10958	1.37944	0.36243	0.674222	2.73957	1.80685	0.600473	8.22728	6.03388e-07	9.16812e-06
Slc29a1|ENSMUSG00000023942	-0.295874	5.27564	20.4994	8.90442e-05	0.0412467	0.281918	5.27577	21.08	7.46566e-05	0.00179835	39.727	39.3046	0.015423	0.401619	0.693	0.772166
Slc37a1|ENSMUSG00000024036	0.275191	3.2815	15.2755	0.00172948	0.173343	0.397283	3.28173	36.9467	1.15023e-06	5.89708e-05	7.02189	11.1826	-0.67133	-14.3557	1.40376e-10	1.83143e-08
Slc38a7|ENSMUSG00000036534	0.160211	4.37824	10.6722	0.020022	0.509232	-0.0918346	4.37816	3.89757	0.153736	0.433354	19.7124	20.7714	-0.0754949	-2.75151	0.0142948	0.0352785
Slc5a4b|ENSMUSG00000020226	-0.899171	-1.34649	5.28014	0.0287599	0.563902	1.28504	-1.34614	12.2714	0.00147387	0.018632	0.269077	0.401663	-0.577967	-2.33593	0.0344039	0.072475
Slc6a15|ENSMUSG00000019894	0.143296	6.18764	8.67359	0.00620414	0.30456	0.113018	6.18751	6.12904	0.0192075	0.119168	64.9135	77.5979	-0.257499	-7.22473	1.86219e-06	2.27875e-05
Slc9a5|ENSMUSG00000014786	-0.205839	6.13404	9.01874	0.00536524	0.290784	0.095672	6.13416	2.21836	0.146885	0.424277	75.9618	70.4328	0.109027	3.62083	0.00244061	0.00813403
Slfn9|ENSMUSG00000069793	0.591079	-0.57912	5.04605	0.0322417	0.583701	-0.0973487	-0.579274	0.166362	0.686281	0.878803	0.469766	0.674739	-0.522388	-3.35566	0.00381753	0.0118141
Slit2|ENSMUSG00000031558	0.451386	3.00494	13.0789	0.00108849	0.1389	-0.0691929	3.00459	0.347883	0.559759	0.810565	6.05814	8.21166	-0.438799	-4.84186	0.000153038	0.000835594
Slitrk1|ENSMUSG00000075478	0.155672	4.83893	6.87695	0.0136155	0.453751	0.320153	4.8389	33.5438	2.55884e-06	0.000116883	22.8402	31.7069	-0.473222	-13.0983	4.98661e-10	4.20037e-08
Slitrk5|ENSMUSG00000033214	0.112046	6.21614	6.71078	0.0179347	0.504255	0.000571247	6.21603	0.000199114	0.989701	0.996856	70.0079	76.0346	-0.119138	-3.6327	0.0024366	0.0081245
Slitrk6|ENSMUSG00000045871	0.385429	2.68193	6.11121	0.0193617	0.509232	0.252914	2.682	3.1233	0.0874197	0.31437	4.8438	7.46425	-0.623857	-8.17593	3.02003e-07	5.21948e-06
Slmap|ENSMUSG00000021870	-0.105707	8.16743	5.48622	0.026035	0.550333	-0.202364	8.16737	23.1581	4.01563e-05	0.00108914	326.162	261.893	0.316609	15.8597	3.71587e-09	1.81943e-07
Smad7|ENSMUSG00000025880	-0.225708	4.52417	8.38135	0.00702574	0.319965	0.262282	4.52434	12.7635	0.00122507	0.0162979	22.8347	23.4378	-0.0376082	-0.928741	0.370141	0.484915
Smarcd1|ENSMUSG00000023018	-0.0949987	7.83064	8.30431	0.0342965	0.597761	-0.195222	7.83064	40.3169	3.24077e-06	0.000142719	255.781	209.441	0.288368	16.1739	4.99704e-09	2.24053e-07
Smtn|ENSMUSG00000020439	0.23624	2.66487	7.86602	0.0218868	0.521742	-0.0792805	2.66493	1.01699	0.411576	0.71241	5.76503	6.40756	-0.152447	-3.29117	0.00936724	0.0248609
Smyd5|ENSMUSG00000033706	-0.126191	4.88052	8.99073	0.0387221	0.615196	-0.0916226	4.88054	5.39918	0.107983	0.357479	32.4286	27.9353	0.215178	9.64853	6.10881e-08	1.45572e-06
Snrk|ENSMUSG00000038145	0.172624	5.29309	11.285	0.00215023	0.194967	-0.135398	5.29311	7.87401	0.00875013	0.0686662	37.8449	38.9193	-0.0403871	-1.3054	0.216197	0.317435
Sntg2|ENSMUSG00000020672	-0.261331	2.89278	7.86782	0.00876943	0.358509	0.158205	2.89294	3.31289	0.0787953	0.294774	7.7711	7.20484	0.109154	1.88295	0.0816659	0.145504
Snw1|ENSMUSG00000021039	-0.102195	6.56114	8.36919	0.0260906	0.550333	-0.0343672	6.56104	1.11531	0.423927	0.722645	100.677	91.5933	0.13642	11.7469	6.57732e-07	9.85575e-06
Sobp|ENSMUSG00000038248	0.147943	4.49317	6.61382	0.028579	0.56264	0.162567	4.4932	9.09692	0.0100562	0.0760188	19.5492	23.9594	-0.293479	-7.85375	4.82277e-07	7.64244e-06
Socs2|ENSMUSG00000020027	-0.205391	3.7803	4.36326	0.0453559	0.648011	-0.169048	3.78032	3.46329	0.0726364	0.281419	16.2179	12.6416	0.359403	5.88449	0.000113754	0.000657052
Socs3|ENSMUSG00000053113	-0.563196	-0.344991	4.1959	0.0494099	0.66942	0.133135	-0.3452	0.257507	0.615573	0.841494	0.958601	0.716287	0.420391	2.61242	0.0219991	0.0501033
Socs5|ENSMUSG00000037104	-0.0979992	7.80998	5.69839	0.0282592	0.56264	-0.0293503	7.81002	0.569242	0.481723	0.762941	238.49	217.871	0.130456	5.15724	0.000528202	0.00234408
Socs6|ENSMUSG00000056153	0.17732	4.97493	13.8572	0.00295335	0.222794	-0.028956	4.97489	0.430655	0.603198	0.835398	28.4967	31.8446	-0.160254	-6.1907	1.71458e-05	0.00013793
Sohlh1|ENSMUSG00000059625	-1.07584	-1.75593	5.4418	0.0265974	0.553339	-0.57276	-1.756	1.47488	0.234113	0.544512	0.479506	0.177897	1.43051	6.48357	7.85067e-06	7.30037e-05
Sos1|ENSMUSG00000024241	0.119855	6.14068	12.1668	0.0120766	0.42821	0.0167152	6.14066	0.265	0.710445	0.892342	65.1614	72.0887	-0.145756	-7.60231	2.09994e-05	0.000162453
Sos2|ENSMUSG00000034801	0.117713	5.85947	7.20193	0.0185602	0.508152	0.0224332	5.85941	0.303719	0.631425	0.850366	53.6722	59.3264	-0.1445	-4.88341	0.000140417	0.000781938
Sox11|ENSMUSG00000063632	0.413092	1.44797	14.0608	0.00455893	0.275125	0.208127	1.44775	4.43784	0.112919	0.36693	2.01655	3.05731	-0.600371	-11.7512	2.70962e-09	1.48001e-07
Sox5|ENSMUSG00000041540	0.187722	3.93478	8.71525	0.0139983	0.457799	-0.0300132	3.93484	0.256575	0.67225	0.871717	13.8788	15.727	-0.180366	-3.49323	0.00306876	0.00982637
Spag6|ENSMUSG00000022783	0.22398	3.32927	10.0163	0.0115118	0.417126	0.54133	3.32946	69.2346	2.89331e-09	4.68798e-07	6.8554	11.6667	-0.767088	-18.4886	9.10371e-11	1.30552e-08
Spata2l|ENSMUSG00000033594	-0.0961748	6.46187	4.20545	0.0491681	0.669366	-0.0260805	6.46209	0.34043	0.563971	0.812941	93.5524	86.5454	0.112318	5.20849	8.35206e-05	0.000504789
Spg21|ENSMUSG00000032388	-0.134434	5.396	7.70275	0.0136345	0.453751	0.049428	5.39597	1.20171	0.330406	0.643102	43.983	41.4989	0.0838729	3.14091	0.00715751	0.0199193
Spink8|ENSMUSG00000050074	0.70842	0.25559	4.27973	0.047331	0.659238	-0.339475	0.255089	1.39552	0.246817	0.559614	0.913207	1.1173	-0.291002	-1.85821	0.0808625	0.144339
Spock3|ENSMUSG00000054162	-0.140812	9.46598	5.30485	0.0284171	0.56264	-0.0162976	9.46596	0.0853416	0.772209	0.916488	754.462	676.315	0.157752	4.19769	0.000605225	0.0026235
Sprn|ENSMUSG00000045733	0.1317	6.11965	9.05669	0.00629922	0.30456	0.137666	6.11961	11.241	0.00218924	0.0251506	61.1082	73.4249	-0.264904	-10.274	7.63536e-08	1.74327e-06
Spry2|ENSMUSG00000022114	-0.144427	6.41727	9.65155	0.00412857	0.26885	0.0781842	6.41742	3.24877	0.0815994	0.301262	89.2712	84.8044	0.0740555	4.40047	0.00109817	0.00422985
Srrm4|ENSMUSG00000063919	0.18792	4.11107	6.58147	0.0155763	0.487156	0.0622557	4.11107	0.800226	0.378194	0.686988	15.0043	18.0928	-0.270043	-6.69378	3.81311e-05	0.000264343
Srrt|ENSMUSG00000037364	-0.127388	6.86927	7.43584	0.0106018	0.399779	-0.0418242	6.86941	0.887938	0.353613	0.665421	125.571	112.266	0.161583	8.048	7.57832e-07	1.10874e-05
Srsf7|ENSMUSG00000024097	-0.099569	7.05419	4.25759	0.0478706	0.661657	-0.0100898	7.05418	0.0484063	0.82736	0.939436	140.739	130.499	0.108981	4.01995	0.00100827	0.00394133
Srxn1|ENSMUSG00000032802	-0.108827	6.53753	4.21765	0.048861	0.669366	-0.134731	6.53744	7.35496	0.0109938	0.080838	103.65	87.2213	0.248964	8.27294	2.35864e-07	4.27444e-06
Sstr5|ENSMUSG00000050824	-1.82021	2.42501	18.8547	0.000149395	0.0522546	1.11924	2.42478	7.20812	0.0117368	0.0845505	7.04576	4.92812	0.515717	1.86866	0.0918912	0.159965
St6galnac4|ENSMUSG00000079442	0.192715	2.98769	5.48189	0.0409559	0.624959	-0.128149	2.98772	2.8222	0.141414	0.415461	7.42773	7.71041	-0.053885	-1.03682	0.320874	0.43336
St6galnac6|ENSMUSG00000026811	0.0946608	6.83596	5.67172	0.0374768	0.614628	-0.115743	6.83592	9.88731	0.00647754	0.0554066	115.536	114.349	0.0148935	0.548656	0.59261	0.690225
St8sia3|ENSMUSG00000056812	-0.193337	9.19816	14.4861	0.000653063	0.111895	0.1021	9.19827	4.67722	0.0387178	0.189355	608.424	573.326	0.0857219	2.7533	0.0138037	0.0342518
Stac|ENSMUSG00000032502	-0.633943	-0.397891	8.91265	0.00560922	0.296364	-0.0343281	-0.397846	0.0286271	0.874848	0.957289	0.930367	0.571076	0.704116	4.72318	0.000456903	0.00208307
Stard10|ENSMUSG00000030688	-0.122621	6.33545	5.95443	0.0208386	0.517309	-0.0950908	6.33547	4.08366	0.0523638	0.229971	89.0386	76.676	0.215656	6.14855	0.000283437	0.00138971
Stard5|ENSMUSG00000046027	0.21087	3.42989	4.19192	0.0495112	0.66942	0.0126115	3.42981	0.0170146	0.897095	0.965086	9.44746	11.1454	-0.238449	-4.81524	0.000203867	0.00105787
Stk19-ps1|ENSMUSG00000092202	-0.556964	-1.41571	4.24447	0.0481934	0.662911	0.0226071	-1.41567	0.0072775	0.934138	0.979118	0.444287	0.293096	0.600116	2.80206	0.0164434	0.0394996
Stk19|ENSMUSG00000061207	-0.26428	4.65969	14.7582	0.000592919	0.109646	0.045291	4.65987	0.465574	0.5003	0.775831	27.7612	23.6684	0.230109	4.27662	0.000613566	0.00265038
Stmn2|ENSMUSG00000027500	0.239909	6.73284	17.2618	0.00025127	0.0660284	0.111011	6.7327	4.14536	0.0507216	0.22613	89.6934	116.117	-0.372503	-10.085	1.38628e-07	2.76809e-06
Strc|ENSMUSG00000033498	-0.61853	-1.14197	4.70492	0.0381767	0.614628	0.404016	-1.1419	2.10941	0.156843	0.43768	0.461888	0.401946	0.200541	1.21207	0.242132	0.347344
Strn|ENSMUSG00000024077	-0.205979	9.21151	13.2936	0.00100559	0.134647	0.173172	9.21157	10.8479	0.0025542	0.0280131	604.287	588.533	0.0381105	1.04138	0.314864	0.427439
Sumo1|ENSMUSG00000026021	-0.108874	5.71516	7.37548	0.0327973	0.586562	0.0453386	5.71512	1.49494	0.342225	0.65563	54.474	52.2175	0.0610331	2.26267	0.0429803	0.0869934
Supt20|ENSMUSG00000095832	0.146157	4.43905	5.22374	0.0323818	0.583708	0.0190113	4.43902	0.102349	0.766454	0.913902	19.7394	22.2471	-0.172535	-4.51739	0.000316914	0.00153306
Swt1|ENSMUSG00000052748	0.154045	3.99458	5.28518	0.0380847	0.614628	-0.0427319	3.99469	0.44633	0.54287	0.800637	14.7097	15.9861	-0.12005	-2.64483	0.017762	0.0420759
Syn1|ENSMUSG00000037217	0.089614	7.82405	5.84668	0.0439683	0.638081	-0.0559064	7.82407	2.48391	0.18088	0.475741	221.046	226.964	-0.0381178	-1.6231	0.124118	0.204704
Syndig1l|ENSMUSG00000071234	-0.148332	8.67942	5.09712	0.0314442	0.57997	0.164072	8.67971	6.91987	0.0133592	0.0924803	405.875	412.5	-0.0233606	-0.627301	0.540032	0.64568
Syngr3|ENSMUSG00000007021	-0.116088	6.92305	8.29629	0.00983561	0.387198	-0.0742663	6.92299	3.78414	0.0776543	0.292353	131.652	115.382	0.190308	6.98502	4.60806e-06	4.71457e-05
Synpo2|ENSMUSG00000050315	-0.129996	5.28583	4.28599	0.0471799	0.659019	0.270575	5.28599	21.5771	6.42052e-05	0.00159353	37.531	41.3535	-0.139923	-4.11576	0.00114986	0.00438801
Syp|ENSMUSG00000031144	0.196002	9.26458	34.5877	1.62539e-05	0.015595	0.340688	9.26467	117.572	7.28801e-12	4.17238e-09	481.468	691.442	-0.522169	-31.0683	3.56466e-12	1.37453e-09
Syt16|ENSMUSG00000044912	-0.120901	5.96013	5.82354	0.0221662	0.524733	0.0139069	5.96019	0.0879019	0.768918	0.915061	64.8404	60.0379	0.111019	3.60769	0.00253604	0.00840117
Syt2|ENSMUSG00000026452	-0.296437	6.25981	12.105	0.00156839	0.161932	-0.46801	6.25977	34.6483	1.96443e-06	9.37197e-05	102.703	61.7363	0.734284	20.2035	2.55779e-13	2.84355e-10
Syt4|ENSMUSG00000024261	0.150243	8.17908	6.96701	0.0130727	0.446319	-0.0980294	8.17906	3.37902	0.0760171	0.288611	274.488	287.372	-0.066173	-1.75132	0.0979142	0.168452
Syt5|ENSMUSG00000004961	0.137868	7.07772	20.8142	0.00225769	0.196419	0.145334	7.07775	25.8941	0.000593922	0.00928172	118.192	142.79	-0.272758	-15.2147	1.44555e-10	1.87188e-08
Syt6|ENSMUSG00000027849	-0.158523	7.70371	9.74899	0.00396723	0.262527	-0.235878	7.70363	24.6575	2.60873e-05	0.000771169	249.26	187.626	0.409795	11.9543	9.6153e-07	1.32944e-05
Sytl2|ENSMUSG00000030616	0.239206	5.63112	9.4136	0.00455311	0.275125	0.445849	5.63124	36.2592	1.34719e-06	6.70666e-05	35.9077	57.8591	-0.688251	-15.6277	4.09563e-08	1.08666e-06
Taf15|ENSMUSG00000020680	0.104574	5.58575	8.111	0.0444965	0.641099	0.0179735	5.58571	0.276447	0.71125	0.892436	45.6994	49.7351	-0.122089	-5.2786	0.000105763	0.000616863
Taf6l|ENSMUSG00000003680	-0.23794	2.68462	6.83822	0.0177494	0.503636	-0.0188142	2.68448	0.0488133	0.841826	0.944377	7.33528	6.18169	0.24685	4.70108	0.000928141	0.00369129
Taf7|ENSMUSG00000051316	-0.197341	3.19092	6.36339	0.0262022	0.551017	0.0616188	3.19087	0.712926	0.458061	0.746636	9.83493	8.95442	0.135316	2.59764	0.0194056	0.0453114
Tal1|ENSMUSG00000028717	-0.447233	0.162124	6.58589	0.0296348	0.571972	0.282978	0.16216	3.03035	0.140406	0.413985	1.2347	1.11425	0.148092	1.58518	0.131351	0.214111
Taldo1|ENSMUSG00000025503	-0.105298	6.60086	7.78902	0.0220828	0.523481	0.0816375	6.60085	5.28348	0.0595663	0.248062	97.985	96.6052	0.0204605	0.997579	0.333073	0.446637
Tatdn3|ENSMUSG00000026632	0.320867	4.10329	5.38589	0.0273244	0.559727	-0.0519731	4.10335	0.15466	0.69692	0.885026	14.5003	17.9732	-0.309762	-3.98255	0.000986496	0.0038745
Tbc1d15|ENSMUSG00000020130	-0.106882	5.79136	8.89883	0.0343334	0.597761	-0.0449544	5.79126	1.85917	0.339835	0.653309	59.3771	53.5461	0.149124	6.32576	8.08957e-05	0.000490805
Tbc1d20|ENSMUSG00000027465	-0.109213	6.59959	4.68699	0.0385204	0.615196	-0.1812	6.59954	14.6738	0.000611677	0.00949011	110.47	90.3027	0.290812	12.1249	8.98105e-09	3.45542e-07
Tbc1d30|ENSMUSG00000052302	-0.163847	6.74297	8.6565	0.00624921	0.30456	-0.0896464	6.74299	2.96916	0.0952279	0.330053	122.063	101.972	0.259456	9.94896	3.54182e-08	9.84898e-07
Tbc1d4|ENSMUSG00000033083	-0.290587	5.25712	13.7714	0.000844494	0.128231	0.349486	5.25744	23.1971	3.9702e-05	0.00108235	37.7967	39.8857	-0.0776127	-1.58148	0.132358	0.215509
Tbc1d8|ENSMUSG00000003134	-0.130922	7.03009	4.20227	0.0492485	0.669366	-0.162739	7.0301	7.72611	0.00933395	0.0719744	146.881	119.56	0.29692	6.85971	2.73603e-05	0.000201167
Tceal5|ENSMUSG00000054034	0.145782	5.90502	19.7114	0.00323644	0.230369	0.0601465	5.90502	3.90594	0.194469	0.494515	54.0167	62.3979	-0.208092	-12.5321	7.20242e-09	2.94756e-07
Tcerg1|ENSMUSG00000024498	0.151007	5.77132	10.3466	0.00311522	0.228487	-0.121903	5.77111	7.8321	0.00995615	0.0753623	52.9348	54.4122	-0.0397123	-1.55096	0.146337	0.233881
Tcf23|ENSMUSG00000006642	-0.751063	-1.39836	7.45869	0.0104951	0.398516	0.497843	-1.39836	3.82143	0.0600373	0.249188	0.429471	0.376578	0.18961	1.33435	0.199802	0.298671
Tcf7|ENSMUSG00000000782	-0.268356	3.934	11.2065	0.00221707	0.194967	-0.304719	3.93411	16.2036	0.000359381	0.00620339	19.8396	13.3438	0.572216	19.6134	7.4007e-13	5.35071e-10
Tdrkh|ENSMUSG00000041912	-0.124398	5.4436	5.86015	0.0217858	0.521742	0.133451	5.44369	7.90289	0.00864079	0.0681483	43.8123	44.1972	-0.0126193	-0.340092	0.74143	0.810616
Tecta|ENSMUSG00000037705	-0.907236	-1.33417	5.48226	0.0260846	0.550333	0.713323	-1.33422	3.79538	0.0608659	0.251288	0.416128	0.373739	0.154993	0.670759	0.520064	0.627942
Tenm3|ENSMUSG00000031561	0.104172	7.11241	4.70264	0.0382203	0.614628	-0.0913099	7.11223	4.03243	0.0537724	0.233926	134.942	136.119	-0.01253	-0.375756	0.71208	0.786656
Tesc|ENSMUSG00000029359	-0.225259	6.36528	14.1137	0.000746199	0.121643	-0.284236	6.3653	25.5721	2.01775e-05	0.000627018	101.005	71.7073	0.49424	17.3463	5.30609e-11	8.76872e-09
Tex9|ENSMUSG00000090626	0.153912	4.16196	6.43093	0.0338745	0.5973	0.0932442	4.16191	2.70217	0.171764	0.461946	15.9634	19.0191	-0.252684	-8.97246	8.02278e-08	1.80901e-06
Tgfb3|ENSMUSG00000021253	0.163774	3.6439	4.94117	0.0428002	0.633368	0.126153	3.6439	3.3878	0.0938783	0.327561	10.742	13.2125	-0.29864	-6.54798	1.96299e-05	0.000153847
Thap3|ENSMUSG00000039759	-0.210376	3.36405	9.15348	0.0137083	0.455324	0.125701	3.36403	3.78112	0.116336	0.372705	10.8154	10.2681	0.0749131	1.37669	0.197705	0.296071
Thbs1|ENSMUSG00000040152	0.657443	0.42522	7.86363	0.00878545	0.358509	1.13377	0.425152	30.67	5.21035e-06	0.000206193	0.468653	2.0352	-2.11858	-13.6739	1.34574e-10	1.78254e-08
Thbs3|ENSMUSG00000028047	-0.25261	4.04842	10.6053	0.00280956	0.219557	0.0346349	4.04856	0.21594	0.645528	0.858276	18.51	16.0959	0.201614	3.7054	0.00186144	0.00651073
Them6|ENSMUSG00000056665	-0.170056	5.56639	8.21358	0.00755009	0.332651	-0.265638	5.56629	24.3255	2.86694e-05	0.000831752	56.9376	42.9337	0.407274	12.1772	2.4102e-08	7.26072e-07
Thrsp|ENSMUSG00000035686	-0.283511	3.38547	4.20957	0.0490642	0.669366	0.0804151	3.38544	0.388147	0.538014	0.797616	11.7502	10.2489	0.197216	2.082	0.0546876	0.105649
Thsd7b|ENSMUSG00000042581	0.363165	1.19573	6.73541	0.0195319	0.509232	-0.147672	1.19572	1.37827	0.291559	0.605944	1.95845	2.2462	-0.197773	-2.1289	0.0537883	0.104283
Tiam2|ENSMUSG00000023800	-0.125256	7.04276	5.30721	0.0283847	0.56264	-0.23331	7.04258	22.2412	5.2619e-05	0.00135492	154.596	120.025	0.365171	10.5905	1.0898e-08	3.98948e-07
Timm44|ENSMUSG00000002949	-0.100954	5.64341	6.76139	0.0493999	0.66942	-0.112339	5.64341	9.27171	0.0200829	0.122728	54.8129	47.3421	0.211391	8.90735	1.09727e-07	2.29964e-06
Timp2|ENSMUSG00000017466	0.158794	8.10663	18.0195	0.000357636	0.0785836	-0.0443305	8.10656	1.59782	0.29045	0.604487	257.7	279.571	-0.117521	-4.67845	0.000727299	0.00303222
Tjap1|ENSMUSG00000012296	-0.208991	4.11645	4.50727	0.0421618	0.631654	-0.0517025	4.11658	0.296664	0.590034	0.829079	19.3809	15.7304	0.301086	4.42158	0.00045083	0.00206026
Tlk1|ENSMUSG00000041997	-0.111451	7.22328	12.4276	0.01292	0.444651	-0.12009	7.22322	16.4944	0.004207	0.0406157	164.833	140.101	0.234533	15.5101	3.42001e-11	6.27305e-09
Tll1|ENSMUSG00000053626	0.377272	1.74223	7.29008	0.0113107	0.411579	0.309455	1.74224	6.06344	0.0198057	0.121617	2.44447	3.89787	-0.673167	-8.25564	3.73341e-07	6.16385e-06
Tlr9|ENSMUSG00000045322	0.360094	0.764375	5.24096	0.0381947	0.614628	-0.0982502	0.764408	0.4576	0.537419	0.796872	1.42695	1.6934	-0.246995	-3.20675	0.00543319	0.0158421
Tmc3|ENSMUSG00000038540	0.694122	-0.0232263	5.01369	0.0327585	0.586562	0.0474909	-0.0233981	0.0298845	0.863921	0.953528	0.68173	1.16396	-0.771767	-4.26429	0.000964627	0.00380155
Tmco5|ENSMUSG00000027355	0.650794	-0.224382	7.88337	0.00871025	0.357226	-0.0823102	-0.224657	0.157549	0.694251	0.8837	0.562421	0.911634	-0.696804	-4.22194	0.000573829	0.00251124
Tmco5b|ENSMUSG00000041255	-0.700609	-1.2684	6.06281	0.019805	0.509232	0.137454	-1.26826	0.256713	0.616116	0.841494	0.468154	0.328664	0.510373	3.41449	0.00404785	0.0124052
Tmeff1|ENSMUSG00000028347	-0.14869	6.46425	13.3859	0.00142148	0.158521	0.100069	6.46416	6.98838	0.0225765	0.132248	90.1423	87.2614	0.0468617	1.85338	0.0848285	0.150122
Tmem130|ENSMUSG00000043388	0.0990264	7.20445	4.42762	0.0438964	0.638081	0.123871	7.2045	7.77731	0.00912721	0.0708766	132.669	155.758	-0.231474	-6.45793	1.38378e-05	0.000115997
Tmem163|ENSMUSG00000026347	0.316927	2.59782	13.1184	0.0026574	0.212448	0.105265	2.59781	1.69427	0.285341	0.600835	4.68158	6.6966	-0.516431	-8.03617	1.36997e-06	1.77799e-05
Tmem178b|ENSMUSG00000057716	0.0977887	7.20684	10.1911	0.0290709	0.56619	0.0298468	7.20682	1.06622	0.47748	0.76003	138.459	151.733	-0.132074	-7.49423	5.05572e-06	5.09152e-05
Tmem196|ENSMUSG00000048004	0.259867	1.83509	5.50887	0.0436814	0.638081	-0.322097	1.83484	9.94237	0.00698106	0.0585162	3.42847	3.36908	0.0252071	0.382313	0.707123	0.783282
Tmem241|ENSMUSG00000049411	0.259129	2.44986	7.16504	0.0164975	0.498679	-0.00110696	2.44995	0.000152549	0.991186	0.997283	4.74913	5.71344	-0.266695	-4.17335	0.000933302	0.00370915
Tmem30b|ENSMUSG00000034435	1.09049	-2.18704	4.35684	0.0455044	0.649314	0.413875	-2.18716	1.09383	0.304032	0.618398	0.083939	0.213102	-1.34413	-4.95384	0.000125373	0.000712101
Tmem42|ENSMUSG00000066233	0.206317	2.84405	7.17849	0.0353699	0.602589	-0.132618	2.84392	3.53784	0.142864	0.417578	6.82375	7.19568	-0.0765679	-1.57246	0.145209	0.232571
Tmem45a|ENSMUSG00000022754	-0.474766	-0.0444605	4.60489	0.0401389	0.62067	0.347801	-0.0442541	2.70412	0.110598	0.362925	1.08443	0.973159	0.156183	1.47088	0.159979	0.250876
Tmem8b|ENSMUSG00000078716	0.139632	5.24002	9.06209	0.0134195	0.452527	-0.0548488	5.24008	1.57786	0.292403	0.606992	35.9748	37.871	-0.0741061	-2.42758	0.0315002	0.0672894
Tmf1|ENSMUSG00000030059	-0.145189	5.18843	8.38456	0.0108327	0.401865	0.0853097	5.18842	3.23883	0.111456	0.364412	37.7887	36.2295	0.060792	1.95504	0.075192	0.136364
Tmod1|ENSMUSG00000028328	-0.119122	5.55085	6.2758	0.0229058	0.5298	-0.0467383	5.55083	1.13316	0.335813	0.648918	50.478	44.9137	0.1685	7.02972	2.27478e-06	2.69066e-05
Tmprss6|ENSMUSG00000016942	-0.671261	1.85121	8.62055	0.00634516	0.30456	0.755571	1.85187	12.5809	0.00131167	0.017135	3.20645	3.63921	-0.182647	-1.1212	0.280928	0.390723
Tmsb15b2|ENSMUSG00000089996	0.279951	2.09489	7.4704	0.0215502	0.521742	0.328785	2.09494	12.0972	0.00333603	0.034371	3.21484	4.85505	-0.594738	-8.9355	2.24222e-06	2.6594e-05
Tmtc1|ENSMUSG00000030306	0.106189	7.3682	7.58424	0.0172982	0.500628	-0.0547424	7.36813	2.25218	0.19064	0.48957	159.702	165.725	-0.053405	-2.10278	0.0544022	0.105297
Tnfaip3|ENSMUSG00000019850	0.305543	2.92855	14.5586	0.00160901	0.164148	0.100782	2.9286	1.87611	0.253746	0.567241	6.10347	8.11034	-0.410132	-7.9437	5.68652e-07	8.72436e-06
Tnfaip8l3|ENSMUSG00000074345	0.232295	2.70334	6.68357	0.0223449	0.525181	-0.188876	2.70342	5.22542	0.0429346	0.202862	6.18451	6.34417	-0.0367718	-0.558231	0.584141	0.682634
Tnfrsf9|ENSMUSG00000028965	0.864664	-1.79254	4.95381	0.033739	0.596752	-0.575342	-1.79268	2.6639	0.113172	0.367292	0.215532	0.238646	-0.146971	-0.764188	0.455237	0.568539
Tnnt2|ENSMUSG00000026414	0.370153	1.86896	5.94203	0.0209606	0.517642	0.579403	1.86882	16.7413	0.000299524	0.00541118	2.26335	4.64091	-1.03595	-13.1553	5.51453e-09	2.41028e-07
Tns1|ENSMUSG00000055322	-0.160812	6.12882	14.5591	0.000752331	0.121643	-0.0221008	6.12897	0.313099	0.621067	0.844065	76.9092	67.9444	0.178803	6.76725	1.86749e-05	0.000147832
Tomm34|ENSMUSG00000018322	0.0974841	6.16327	9.24973	0.0414838	0.630311	0.0432651	6.16327	2.10093	0.332505	0.644839	67.2666	74.1735	-0.141012	-6.78672	3.22979e-05	0.000230631
Tomm70a|ENSMUSG00000022752	-0.141732	9.46645	4.52155	0.041859	0.631654	0.284401	9.46661	20.7239	8.32572e-05	0.00197233	662.439	735.564	-0.151064	-4.29746	0.000519137	0.00231225
Tox2|ENSMUSG00000074607	0.284995	2.34231	7.81701	0.00950165	0.380488	-0.230809	2.34237	6.18443	0.0242221	0.138772	4.88226	5.00582	-0.036057	-0.939108	0.360995	0.475914
Tpm2|ENSMUSG00000028464	-0.450203	4.07559	14.5612	0.000635822	0.111017	0.318413	4.07593	8.42871	0.00688871	0.0579563	18.2326	16.7157	0.125312	1.616	0.136613	0.22115
Tpst1|ENSMUSG00000034118	-0.151259	5.68246	12.5096	0.0030735	0.228487	-0.275756	5.68239	47.9302	1.13184e-07	9.14835e-06	61.0871	45.3459	0.429896	26.6202	1.68134e-14	4.60027e-11
Traf3ip3|ENSMUSG00000037318	-0.539259	0.163715	10.8242	0.00695619	0.318776	0.182501	0.163648	1.38652	0.336049	0.649083	1.3149	1.03051	0.351596	3.65994	0.00239303	0.00800075
Trank1|ENSMUSG00000062296	-0.102466	9.52518	8.41757	0.0254531	0.548041	-0.145447	9.52529	19.5309	0.00076922	0.0113402	815.875	689.552	0.24269	11.8965	1.24637e-09	8.22323e-08
Trex1|ENSMUSG00000049734	0.2913	2.87002	10.716	0.00271296	0.213291	-0.0887356	2.87009	1.13871	0.32818	0.641384	6.45387	7.47794	-0.212478	-3.85286	0.00138148	0.00510141
Trhr|ENSMUSG00000038760	0.860111	-1.57873	4.1806	0.0498003	0.66942	-0.791953	-1.57869	4.48986	0.0425432	0.201845	0.262488	0.226908	0.210143	0.542937	0.59462	0.691641
Trib3|ENSMUSG00000032715	-0.378036	1.12395	4.76793	0.0369953	0.612374	-0.365165	1.12379	4.92577	0.0342174	0.175115	2.98652	1.86705	0.677705	5.45481	0.000118097	0.000677206
Trim12a|ENSMUSG00000066258	0.932574	1.56112	4.50761	0.0421546	0.631654	-0.121662	1.5615	0.0925446	0.763081	0.912691	2.29388	2.79267	-0.283852	-2.01271	0.0645731	0.120742
Trim34a|ENSMUSG00000056144	0.404602	1.18337	6.25621	0.0180971	0.505157	-0.0130627	1.1836	0.00747052	0.931701	0.97854	1.76913	2.34802	-0.408409	-3.94615	0.00104749	0.00407534
Trim59|ENSMUSG00000034317	-0.21349	5.35622	9.4665	0.0044548	0.272682	0.120858	5.35618	3.35622	0.0769625	0.290768	42.6933	40.233	0.0856325	1.89101	0.0787354	0.141247
Trim9|ENSMUSG00000021071	-0.114174	7.94911	6.21779	0.0184232	0.506829	0.0707365	7.94928	2.61173	0.116614	0.373107	253.695	248.486	0.0299324	0.978991	0.345134	0.459437
Trip13|ENSMUSG00000021569	0.690622	-1.647	5.54467	0.0293587	0.568943	-0.179077	-1.64728	0.498874	0.514486	0.785309	0.209579	0.286166	-0.449359	-3.34332	0.0056974	0.0165292
Triqk|ENSMUSG00000055963	0.15388	3.99891	7.51077	0.0387242	0.615196	0.139247	3.99883	6.91076	0.04381	0.20564	13.8906	17.1789	-0.306526	-10.5193	4.22788e-08	1.10026e-06
Trit1|ENSMUSG00000028653	-0.189066	3.03035	8.19678	0.0420638	0.631654	0.0889185	3.03035	2.07708	0.305734	0.61995	8.59545	8.04413	0.0956368	4.05496	0.00082608	0.00335145
Trmt10a|ENSMUSG00000004127	-0.196622	3.16186	7.78524	0.0283393	0.56264	0.204693	3.1619	9.50678	0.0143175	0.0970798	9.14787	9.21286	-0.0102123	-0.295496	0.771218	0.8343
Trp53i11|ENSMUSG00000068735	0.292394	3.42165	5.86047	0.0217825	0.521742	0.359923	3.42169	10.3332	0.00313428	0.0327057	7.8857	12.0123	-0.607199	-9.21547	5.19512e-08	1.2878e-06
Trpc7|ENSMUSG00000021541	0.259699	2.92448	4.60315	0.0401739	0.62067	0.243196	2.92435	4.78812	0.0366336	0.18255	5.88733	8.51322	-0.53209	-9.19017	3.54541e-07	5.90402e-06
Trpm2|ENSMUSG00000009292	0.110601	5.35959	6.72713	0.0419011	0.631654	0.0581011	5.35973	2.03618	0.251968	0.56593	37.7124	42.5367	-0.173669	-7.03589	2.0262e-06	2.44164e-05
Trpv2|ENSMUSG00000018507	0.366596	3.555	24.0963	3.0537e-05	0.0218072	0.0368542	3.55497	0.286528	0.626701	0.847927	9.63838	12.7143	-0.399594	-7.55558	6.73017e-06	6.43072e-05
Tsc2|ENSMUSG00000002496	0.116962	6.76545	11.862	0.0103074	0.394329	-0.101244	6.76554	10.0609	0.0172133	0.110478	107.555	108.899	-0.0179208	-0.887419	0.388652	0.503614
Tshz1|ENSMUSG00000046982	0.145026	5.58367	9.86089	0.00521444	0.287551	0.00125762	5.58362	0.000851176	0.97931	0.994481	44.4005	49.2813	-0.150464	-4.97917	0.000442475	0.00202634
Tsku|ENSMUSG00000049580	0.606902	0.0511953	6.59569	0.0154752	0.484879	0.010409	0.0510248	0.00259225	0.959734	0.988303	0.752041	1.08767	-0.532354	-3.28151	0.00560934	0.0163065
Tspan33|ENSMUSG00000001763	0.179033	3.32814	6.10733	0.0433723	0.635194	0.541629	3.32836	65.7371	4.98001e-09	7.18754e-07	7.38598	11.6818	-0.661402	-13.2543	5.09393e-10	4.24951e-08
Tspyl3|ENSMUSG00000074671	0.124864	5.27619	11.4806	0.025425	0.548041	0.112132	5.27611	10.5987	0.0303014	0.161523	34.3305	40.5363	-0.239724	-9.73415	4.19145e-08	1.0971e-06
Tst|ENSMUSG00000044986	-0.195794	4.4523	9.63538	0.00418893	0.26885	0.169877	4.45236	8.23229	0.00807805	0.0648623	22.215	21.7711	0.0291215	0.851931	0.406717	0.520838
Ttc21a|ENSMUSG00000032514	0.64283	0.348712	6.02025	0.0202041	0.509232	-0.153052	0.347748	0.47053	0.498045	0.774526	0.986511	1.52299	-0.626498	-3.25336	0.00507729	0.0149985
Ttc3|ENSMUSG00000040785	-0.116092	9.53465	12.2006	0.0110712	0.406316	-0.0107913	9.5347	0.116774	0.802154	0.929434	775.663	711.54	0.124486	7.59998	1.322e-06	1.72346e-05
Ttc9|ENSMUSG00000042734	-0.167181	5.29059	10.5527	0.002869	0.221494	-0.141938	5.29052	9.00217	0.00564804	0.0502878	45.0072	36.295	0.310387	8.85501	1.03827e-05	9.20598e-05
Ttll1|ENSMUSG00000022442	0.135067	5.03322	13.8093	0.0224303	0.525181	0.00516461	5.03318	0.0223474	0.925573	0.975424	30.1668	33.3031	-0.142696	-7.67955	6.48917e-07	9.76583e-06
Ttll11|ENSMUSG00000026885	-0.151538	5.47892	4.7925	0.0365456	0.611985	-0.100132	5.47888	2.40504	0.1315	0.399243	50.4733	42.1526	0.259897	6.15375	8.95181e-05	0.000535443
Ttpa|ENSMUSG00000073988	-0.188007	2.95595	5.61059	0.0481648	0.662911	0.0675672	2.95602	0.81914	0.450822	0.742152	8.1852	7.54423	0.117643	2.50032	0.0231657	0.0522584
Tuba4a|ENSMUSG00000026202	-0.156896	8.55701	13.5564	0.00091325	0.131531	-0.131735	8.55695	10.9723	0.00243205	0.0270752	424.991	347.878	0.288851	13.743	3.0093e-10	3.04724e-08
Tusc3|ENSMUSG00000039530	-0.0947614	7.93341	4.46851	0.0429963	0.633664	-8.20039e-05	7.93334	3.95661e-06	0.998432	0.999364	254.688	238.334	0.0957464	3.73198	0.00279442	0.00908368
Txnl1|ENSMUSG00000024583	-0.0967181	5.97478	13.5406	0.0470375	0.658103	0.0306357	5.97475	1.54017	0.502095	0.776788	65.0746	62.1668	0.0659499	4.7845	0.000342181	0.00163884
Ube2g1|ENSMUSG00000020794	-0.114507	6.18895	5.80317	0.022381	0.525181	0.0948075	6.18894	4.77567	0.0368614	0.182975	74.2446	73.2186	0.020077	0.891969	0.385333	0.500584
Ube2v2|ENSMUSG00000022674	-0.117334	5.30079	5.17801	0.0344568	0.597761	0.0376518	5.3007	0.645091	0.464513	0.750236	40.5478	38.4312	0.0773434	2.27726	0.0363908	0.0758685
Ubl3|ENSMUSG00000001687	-0.0893233	8.10203	5.37246	0.0458312	0.650099	0.00589937	8.10202	0.0269852	0.887807	0.961176	287.279	270.622	0.0861743	5.77132	3.01623e-05	0.00021753
Ubtf|ENSMUSG00000020923	-0.126057	7.27521	9.27595	0.00491624	0.283567	-0.100482	7.27521	6.63037	0.016592	0.107779	170.782	145.541	0.230727	9.78575	2.38103e-08	7.18629e-07
Ubxn7|ENSMUSG00000053774	0.101088	6.16062	8.52274	0.0352747	0.601566	0.163711	6.16063	24.4683	0.000278673	0.00509171	62.559	75.5068	-0.271389	-16.8576	7.87924e-12	2.45431e-09
Uggt2|ENSMUSG00000042104	-0.124387	5.43407	9.86348	0.0205438	0.514272	-0.0192832	5.43407	0.28287	0.701075	0.887099	46.4819	42.1696	0.140466	5.08037	0.000173683	0.000928734
Ugt8a|ENSMUSG00000032854	-0.152297	6.86686	4.27666	0.0474055	0.659238	0.0988547	6.86692	1.94753	0.173165	0.463642	118.37	114.345	0.0499221	0.916216	0.377038	0.492129
Ulk1|ENSMUSG00000029512	0.159558	5.68862	13.2217	0.00185599	0.181926	0.0249014	5.68862	0.374536	0.602762	0.835009	46.8848	53.2469	-0.183578	-8.81081	3.04865e-06	3.39539e-05
Unc13b|ENSMUSG00000028456	0.2116	4.10175	9.52393	0.00435068	0.270077	0.15877	4.10188	6.07904	0.0209985	0.126234	14.5705	18.7805	-0.366178	-9.74518	2.25798e-08	6.94691e-07
Upb1|ENSMUSG00000033427	-0.374951	2.90014	8.32406	0.00720022	0.323897	0.796057	2.90072	41.1129	4.56993e-07	2.76368e-05	5.85965	8.166	-0.478816	-6.17224	1.96511e-05	0.000153944
Upf2|ENSMUSG00000043241	-0.100654	5.71485	6.26623	0.0478436	0.661657	-0.0490476	5.71476	1.7243	0.30187	0.616409	56.0801	50.6852	0.145925	7.9053	2.60441e-06	3.00877e-05
Upp2|ENSMUSG00000026839	0.188207	4.14921	10.4113	0.00972924	0.385102	0.0772918	4.1493	2.03216	0.254424	0.567796	15.5747	18.6896	-0.263033	-7.11473	3.39014e-06	3.69045e-05
Urb1|ENSMUSG00000039929	0.15507	4.23406	5.57629	0.030394	0.575172	-0.0777733	4.2342	1.61515	0.242517	0.555114	18.0404	19.0615	-0.0794305	-1.79026	0.0914247	0.159453
Usp43|ENSMUSG00000020905	0.797957	-1.16854	4.43394	0.0437559	0.638081	-0.252385	-1.16889	0.583213	0.451059	0.7424	0.26909	0.411142	-0.611552	-2.49048	0.0290337	0.0628328
Vat1l|ENSMUSG00000046844	-0.258834	7.80091	4.41467	0.0441859	0.640154	0.423545	7.80134	14.0326	0.000769212	0.0113402	211.093	242.718	-0.201403	-2.80721	0.0175295	0.04161
Vdr|ENSMUSG00000022479	-0.587655	-0.54739	9.06238	0.0188432	0.508495	0.731036	-0.547032	15.303	0.00209851	0.0244186	0.628882	0.702122	-0.158932	-1.58189	0.133354	0.216907
Vegfa|ENSMUSG00000023951	-0.217076	6.15782	10.3385	0.00312538	0.228487	0.0199938	6.158	0.0988842	0.755364	0.910284	78.3755	68.4925	0.194456	3.73525	0.00207484	0.00708991
Vill|ENSMUSG00000038775	1.20621	2.68391	21.1003	7.40435e-05	0.0352509	0.990167	2.68473	17.8342	0.000208328	0.00407057	1.81982	9.48176	-2.38136	-17.8974	1.90353e-09	1.15087e-07
Vip|ENSMUSG00000019772	-0.466488	0.26564	4.52883	0.0417054	0.631654	0.0489112	0.265611	0.0565239	0.813704	0.934101	1.33021	1.10583	0.26652	2.27195	0.0371457	0.0772011
Vmp1|ENSMUSG00000018171	-0.182297	7.03188	13.5984	0.000899382	0.131531	-0.119332	7.03174	6.8835	0.0135806	0.0935235	150.751	121.774	0.307959	10.24	6.35365e-08	1.49998e-06
Vps37d|ENSMUSG00000043614	0.298746	2.83788	11.393	0.00240518	0.200491	0.202589	2.83796	6.12826	0.0263927	0.147163	5.67089	7.8434	-0.467903	-9.39928	1.04444e-07	2.22917e-06
Vps52|ENSMUSG00000024319	-0.10024	5.88197	5.09824	0.0427176	0.633368	-0.0973544	5.88196	5.31443	0.0359087	0.180384	64.0783	55.8909	0.197222	7.05826	6.43917e-06	6.20736e-05
Vrk1|ENSMUSG00000021115	-0.457283	5.44537	21.8597	5.88461e-05	0.0315176	0.0731784	5.44541	0.621316	0.436784	0.733023	52.509	40.4384	0.376838	6.83168	3.19926e-06	3.53365e-05
Vwa1|ENSMUSG00000042116	-0.17457	4.3209	6.04015	0.0200164	0.509232	-0.0197085	4.32102	0.0874321	0.769518	0.915267	21.5994	18.9811	0.186426	4.15941	0.000710031	0.00297524
Vwa3b|ENSMUSG00000050122	0.782556	-1.96513	4.35539	0.045538	0.649314	-0.327541	-1.96535	1.01589	0.321608	0.635467	0.167338	0.226797	-0.438643	-1.84466	0.0886694	0.155492
Vwa5b2|ENSMUSG00000046613	0.29716	4.33851	6.08845	0.0195688	0.509232	1.27511	4.33906	125.954	3.1763e-12	2.08135e-09	10.447	28.1544	-1.43027	-33.4528	1.8558e-14	4.60027e-11
Vwa7|ENSMUSG00000007030	-0.452555	1.5581	5.07446	0.0317954	0.582505	-0.628437	1.55823	10.7	0.00270801	0.0293624	4.43563	2.19166	1.01712	6.95053	1.74852e-05	0.00014009
Wbscr17|ENSMUSG00000034040	-0.292255	6.03839	6.36581	0.0172012	0.500628	0.255534	6.03861	5.6553	0.0240177	0.137823	67.9994	66.5055	0.0320483	0.493663	0.630475	0.721017
Wdr52|ENSMUSG00000071550	0.306007	1.69946	6.54689	0.0289036	0.564212	0.387795	1.69912	13.2565	0.00181229	0.0218295	2.22349	3.85512	-0.793949	-6.0458	2.0322e-05	0.000158087
Wdr55|ENSMUSG00000042660	-0.170459	3.32536	7.96413	0.0474774	0.659238	0.0854992	3.32526	2.34768	0.285209	0.600835	10.4879	9.94242	0.077063	2.27499	0.0371275	0.0771726
Wdr62|ENSMUSG00000037020	0.683621	0.265773	8.61443	0.00636166	0.30456	0.0338531	0.265869	0.0265285	0.871716	0.956724	0.814455	1.33637	-0.714414	-7.28052	1.61165e-06	2.03829e-05
Wdr92|ENSMUSG00000078970	-0.137266	7.48914	8.14416	0.0077793	0.336691	-0.20328	7.48901	21.4733	6.62516e-05	0.00163487	207.304	162.896	0.347802	13.5568	1.539e-08	5.20589e-07
Wnk2|ENSMUSG00000037989	0.105021	6.45424	6.68872	0.023465	0.532473	0.00352053	6.45431	0.00858921	0.935706	0.979565	82.2922	88.6867	-0.107962	-5.16378	0.000167602	0.000901702
Wnk4|ENSMUSG00000035112	-0.266678	3.09989	9.44395	0.00449643	0.27425	-0.672076	3.09958	67.7991	3.60698e-09	5.58107e-07	12.6103	6.69842	0.912704	13.1115	7.43215e-08	1.70619e-06
Wnt2b|ENSMUSG00000027840	-0.808537	-0.518032	8.27213	0.00736244	0.326059	1.08459	-0.517668	17.2892	0.000249386	0.00466072	0.722367	0.807832	-0.161324	-1.09789	0.291685	0.403036
Wnt4|ENSMUSG00000036856	-0.419285	1.45512	4.81304	0.0361743	0.610168	-0.416501	1.45507	5.50873	0.0257624	0.144977	3.73889	2.23083	0.745031	5.82997	0.0001439	0.000797491
Wwc1|ENSMUSG00000018849	-0.109551	6.78245	6.03951	0.0200224	0.509232	0.335432	6.78275	61.7451	9.49329e-09	1.1815e-06	99.5433	116.963	-0.232658	-8.63501	8.66244e-07	1.23256e-05
Wwp1|ENSMUSG00000041058	-0.126185	6.58406	7.55937	0.0100387	0.390595	0.093106	6.58416	4.80446	0.0363372	0.181686	98.0004	96.1405	0.0276429	1.05711	0.305271	0.417157
Xist|ENSMUSG00000086503	0.487074	9.72576	5.75869	0.0228581	0.529746	-0.350478	9.7252	2.30325	0.139641	0.412868	870.735	831.518	0.0664875	0.775452	0.450725	0.564104
Xrra1|ENSMUSG00000035211	0.531959	0.947716	4.66776	0.0388929	0.616068	-0.260622	0.947912	1.32298	0.259204	0.572759	1.45568	1.76482	-0.277831	-1.7143	0.109018	0.184083
Yars|ENSMUSG00000028811	-0.110004	6.22368	7.4571	0.0207379	0.516609	0.0467328	6.22367	1.5602	0.292854	0.607533	77.5843	74.1551	0.0652182	3.58619	0.00256542	0.00847424
Ypel5|ENSMUSG00000039770	-0.133427	6.80106	13.7871	0.00322469	0.230369	-0.0303371	6.80095	0.828902	0.474497	0.758031	119.406	107.369	0.1533	8.9825	2.21578e-07	4.0686e-06
Zar1l|ENSMUSG00000056586	0.54422	-0.528651	4.39019	0.0447388	0.642296	-0.0427787	-0.528804	0.0336397	0.855717	0.951197	0.501668	0.696594	-0.473585	-2.80232	0.0123322	0.0313123
Zbtb18|ENSMUSG00000063659	-0.207158	7.34307	6.15076	0.0190075	0.508495	-0.174327	7.34303	5.2065	0.0298162	0.159779	190.425	147.102	0.372411	12.2378	2.771e-08	8.19122e-07
Zbtb20|ENSMUSG00000022708	0.223612	3.87477	4.98267	0.0332624	0.59015	-0.361733	3.87469	15.4525	0.00046541	0.00765653	14.9939	13.6075	0.139975	2.5758	0.024983	0.0556025
Zbtb34|ENSMUSG00000068966	-0.132652	4.49938	5.9314	0.0475033	0.659238	-0.165637	4.49935	10.2282	0.00811762	0.0650584	25.6463	20.7368	0.306559	10.1213	3.36393e-08	9.50667e-07
Zbtb46|ENSMUSG00000027583	-0.218835	3.70077	5.04863	0.0322009	0.583701	0.359969	3.70106	15.7061	0.000426276	0.00715597	12.3385	13.8117	-0.16272	-2.7014	0.0241707	0.0541259
Zcchc2|ENSMUSG00000038866	0.195995	4.49369	10.1678	0.0034855	0.243445	0.0991771	4.4937	2.99027	0.116243	0.372617	19.4651	23.9626	-0.299898	-9.09697	1.15552e-07	2.39641e-06
Zdhhc15|ENSMUSG00000033906	0.186972	3.70933	10.5703	0.0183175	0.506829	0.0106645	3.7093	0.0402926	0.884983	0.960322	11.6428	13.4501	-0.208187	-5.4007	0.000133544	0.000748711
Zdhhc18|ENSMUSG00000037553	-0.145554	5.92765	6.89145	0.0135264	0.452637	0.0451903	5.92779	0.739664	0.396634	0.70261	63.8642	59.6994	0.09729	3.08346	0.00710084	0.0197957
Zfhx4|ENSMUSG00000025255	0.138653	4.67941	4.90823	0.0345072	0.597761	0.0262788	4.67933	0.20533	0.660184	0.865343	23.4492	26.3996	-0.170973	-4.80997	0.000187021	0.000986981
Zfp180|ENSMUSG00000057101	-0.177592	6.95027	15.4044	0.000472628	0.0931076	-0.0253265	6.95036	0.362727	0.551551	0.804696	135.637	117.734	0.204227	8.46332	2.67579e-05	0.000197492
Zfp189|ENSMUSG00000039634	0.250168	3.48223	5.11185	0.0312182	0.57997	0.452636	3.48238	18.4309	0.000171533	0.00347056	7.44437	12.7114	-0.771904	-9.69038	4.16388e-08	1.09604e-06
Zfp319|ENSMUSG00000074140	0.254002	2.7866	6.06025	0.0198288	0.509232	-0.0476305	2.78688	0.243606	0.625232	0.847126	6.10056	7.18208	-0.235459	-4.24749	0.000552851	0.00243499
Zfp385a|ENSMUSG00000000552	-0.114736	5.96739	8.12965	0.0188174	0.508495	-0.0735682	5.96751	3.68504	0.107581	0.356493	67.9958	60.1038	0.17799	7.20354	7.83693e-05	0.000477145
Zfp40|ENSMUSG00000002617	0.147899	5.23089	6.50002	0.0161693	0.495039	0.196357	5.23101	13.0942	0.00108347	0.0148513	31.7721	40.8045	-0.36097	-10.3807	1.31046e-08	4.55693e-07
Zfp52|ENSMUSG00000051341	0.242271	2.1887	5.52386	0.0362064	0.610168	0.339042	2.18869	12.2452	0.00186812	0.0224057	3.29737	5.16363	-0.647072	-8.88773	7.95645e-06	7.39477e-05
Zfp706|ENSMUSG00000062397	-0.124724	7.9635	10.1957	0.00532031	0.289475	-0.0702273	7.96348	3.70124	0.0929166	0.325416	270.896	236.288	0.197196	9.93856	5.92269e-08	1.42935e-06
Zfp773|ENSMUSG00000063535	0.41482	0.564626	5.61607	0.0244644	0.543129	0.133524	0.564649	0.704363	0.427261	0.724879	1.079	1.60398	-0.571963	-5.11117	9.74513e-05	0.000575553
Zfp799|ENSMUSG00000095253	-0.134096	5.52077	13.9633	0.0105453	0.398975	-0.0200253	5.52071	0.365854	0.682508	0.876838	49.4222	44.3941	0.154793	6.95602	3.98385e-06	4.18702e-05
Zfp811|ENSMUSG00000055202	0.29549	2.17078	8.61916	0.0122791	0.431252	0.338677	2.17086	13.4152	0.00168606	0.0207288	3.30568	5.14977	-0.639561	-10.7584	5.76439e-09	2.49189e-07
Zfp871|ENSMUSG00000024298	0.119029	6.01704	5.86025	0.0217847	0.521742	-0.163232	6.01694	12.9303	0.0011513	0.015582	64.3064	62.8252	0.0336189	1.31225	0.207607	0.307425
Zfyve28|ENSMUSG00000037224	-0.134924	6.29755	6.64431	0.0151348	0.478589	-0.337338	6.29745	47.2814	1.28547e-07	1.00355e-05	94.9007	68.46	0.471157	16.7766	3.44329e-11	6.27305e-09
Zmynd8|ENSMUSG00000039671	-0.115647	6.88846	5.92583	0.0211211	0.520107	0.188761	6.88871	17.4414	0.000237107	0.00448897	114.157	120.728	-0.0807381	-2.41424	0.0326982	0.0693958
Znf41-ps|ENSMUSG00000084350	-0.361265	1.18443	6.32805	0.019035	0.508495	0.569111	1.18468	16.9808	0.000276387	0.00505532	2.14127	2.50428	-0.225927	-2.23646	0.0418045	0.0850003
Zswim6|ENSMUSG00000032846	-0.108137	7.11658	5.76646	0.022774	0.529746	0.027004	7.1167	0.403929	0.529917	0.792936	143.168	135.13	0.0833613	3.12378	0.00620808	0.0177438
Zyx|ENSMUSG00000029860	0.168609	4.4212	4.83084	0.0358559	0.608365	0.426616	4.42132	35.6204	1.56275e-06	7.582e-05	16.7305	25.0935	-0.584839	-19.4968	4.88001e-11	8.38395e-09

## Sheet: 520_DEGs
Differentially expressed genes (p<0.05) that overlap in contrast 3 and contrast 2 (columns A-K). Resuts of unpaired t-test comparing expression levels in Htt+/+ Hdac2 WT vs. HttQ111/+ Hdac2 KO (columns L-Q)
	HttQ111/+ vs Htt+/+ in Hdac2 WT (contrast 3)					Hdac2 KO vs Hdac2 WT in HttQ111/+ (contrast 2)					Htt+/+ Hdac2 WT vs HttQ111/+ Hdac2 KO
id	logFC	logCPM	F	Pvalue	BH	logFC	logCPM	F	Pvalue	BH	mean_httwt_hdac2wt	mean_httq111_hdac2ko	log2FC	t_statistic	pvalue	BH
1110008L16Rik|ENSMUSG00000021023	-0.221856	2.85881	7.91203	0.0231496	0.531139	0.282922	2.85873	15.25	0.00190186	0.0226679	7.19695	7.49714	-0.058955	-1.77217	0.0944638	0.163521
1110017D15Rik|ENSMUSG00000028441	0.432711	0.707863	7.16864	0.0175831	0.502597	0.688482	0.707715	23.1171	4.06397e-05	0.00109219	0.996495	2.15052	-1.10975	-10.6366	8.55195e-09	3.33468e-07
1500009L16Rik|ENSMUSG00000087651	0.179647	3.81581	4.82701	0.0359242	0.608365	0.98801	3.81614	172.329	6.37629e-14	1.36891e-10	8.28627	18.0304	-1.12164	-24.0814	1.68786e-14	4.60027e-11
1700001O22Rik|ENSMUSG00000044320	-0.43937	1.60562	8.27923	0.00734002	0.326059	-0.426284	1.60566	8.59648	0.0064139	0.0549694	4.16941	2.39765	0.798223	9.94973	1.78761e-08	5.79786e-07
2010001M06Rik|ENSMUSG00000085042	-0.450661	4.19796	9.30904	0.00475436	0.281955	0.686841	4.19844	24.9075	2.43069e-05	0.000733693	17.1162	20.4528	-0.256938	-5.09143	0.000145518	0.000804919
2610018G03Rik|ENSMUSG00000031112	-0.103902	5.62354	5.18844	0.0438432	0.638081	-0.177228	5.62352	17.2812	0.000250044	0.00466794	55.3518	45.3653	0.287042	11.1189	5.38786e-09	2.36684e-07
4930539E08Rik|ENSMUSG00000048905	-0.29108	2.05248	4.9253	0.0342172	0.597761	0.491176	2.05284	15.6708	0.000431507	0.00719887	3.69432	4.12606	-0.159458	-1.80453	0.0910507	0.158961
5033417F24Rik|ENSMUSG00000097251	0.336634	0.713804	4.52148	0.0493137	0.66942	-0.554624	0.713711	13.9566	0.000790618	0.0115663	1.76657	1.49072	0.244945	2.29863	0.0351808	0.0737712
5330413P13Rik|ENSMUSG00000086822	0.978166	0.489222	16.5069	0.000323708	0.0761584	0.785551	0.489322	14.0172	0.000773501	0.0113838	0.563944	1.81407	-1.6856	-9.55851	1.2132e-07	2.47372e-06
6330403A02Rik|ENSMUSG00000053963	0.116799	7.65031	6.40138	0.0169209	0.499151	-0.161696	7.65022	13.7146	0.00086306	0.012425	201.812	196.331	0.0397219	1.26486	0.226732	0.329584
9430020K01Rik|ENSMUSG00000033960	-0.137464	8.72681	6.99957	0.0128822	0.444243	-0.226632	8.72687	21.9398	5.75726e-05	0.00145413	494.853	383.362	0.368293	16.4213	6.39643e-10	5.11479e-08
9930014A18Rik|ENSMUSG00000097493	-0.251086	2.6522	8.157	0.013756	0.456024	-0.210164	2.65202	6.74817	0.0266576	0.148074	7.60328	5.54099	0.456476	8.66405	2.3381e-07	4.24379e-06
A330021E22Rik|ENSMUSG00000040473	0.197731	4.044	8.44782	0.00815558	0.344282	0.293628	4.04408	21.5557	6.46218e-05	0.00160156	13.0984	18.5827	-0.504567	-11.4134	1.02907e-06	1.40491e-05
A830073O21Rik|ENSMUSG00000091890	-0.198922	3.52174	5.16177	0.0304657	0.575172	-0.381284	3.52154	21.9817	5.68558e-05	0.00144026	14.347	9.70258	0.564313	10.5515	2.35752e-08	7.14259e-07
Abca8a|ENSMUSG00000041828	-0.331893	5.02245	10.1114	0.00342427	0.240527	0.356016	5.02233	12.3368	0.00143789	0.0183612	33.2964	34.2199	-0.0394666	-0.636068	0.534023	0.640606
Abcb10|ENSMUSG00000031974	0.167251	5.11432	12.5213	0.00407633	0.266658	0.261531	5.11439	35.9312	1.50595e-06	7.38989e-05	28.3022	38.0466	-0.426851	-17.8004	8.5447e-12	2.49595e-09
Abhd14a|ENSMUSG00000042210	0.358266	4.59052	6.49027	0.016242	0.496206	-0.475847	4.59047	13.2938	0.0010066	0.0140328	23.963	21.9586	0.126025	1.66142	0.115719	0.193359
Acat2|ENSMUSG00000023832	-0.120734	5.17511	4.58956	0.0404493	0.623461	-0.17073	5.17508	10.0731	0.00348022	0.0353476	40.936	33.424	0.292486	7.32326	5.38769e-06	5.37901e-05
Acvr1c|ENSMUSG00000026834	-0.280038	7.09807	11.648	0.00186819	0.181926	-0.197445	7.09801	6.94282	0.0132215	0.0918945	168.086	119.918	0.487159	10.0989	4.9328e-08	1.23512e-06
Acvrl1|ENSMUSG00000000530	-0.307699	6.20655	13.3555	0.000982989	0.134641	0.242767	6.2068	9.5359	0.00433215	0.0415469	78.7713	75.3508	0.0640478	2.12838	0.0482675	0.0954786
Acy1|ENSMUSG00000023262	-0.177485	4.60842	5.34683	0.0278453	0.56264	-0.18406	4.60839	6.69934	0.0147651	0.0992341	28.5248	22.3699	0.350661	6.98922	4.04156e-06	4.23998e-05
Adamts19|ENSMUSG00000053441	0.809374	-0.171708	8.25662	0.00741165	0.327392	0.991802	-0.171532	16.0267	0.000381778	0.00652441	0.319823	1.18807	-1.89328	-13.3837	2.82552e-10	2.95352e-08
Adamts6|ENSMUSG00000046169	0.315194	2.68387	8.27797	0.00734399	0.326059	0.369518	2.68398	12.5544	0.00132477	0.0172633	4.58756	7.50489	-0.710105	-13.3329	3.82751e-10	3.53271e-08
Adra2c|ENSMUSG00000045318	-0.134785	5.27207	6.54605	0.0158312	0.490598	-0.403417	5.27207	66.2582	4.58708e-09	6.73359e-07	47.2582	32.7096	0.530849	17.5065	1.33063e-11	3.27426e-09
Ago4|ENSMUSG00000042500	-0.236937	5.67394	6.97377	0.0130329	0.445849	0.239103	5.67431	8.10669	0.00791021	0.0639031	51.5469	52.9983	-0.0400601	-0.691527	0.499375	0.609762
AI182371|ENSMUSG00000035875	-0.783421	-1.75115	4.76395	0.0370687	0.612374	0.946087	-1.75134	8.63774	0.00630263	0.0543685	0.250151	0.29071	-0.21678	-1.08089	0.296645	0.408198
AI593442|ENSMUSG00000078307	-0.169426	8.67585	6.70555	0.0147177	0.467991	-0.241787	8.67575	16.5743	0.000316881	0.00564568	491.69	368.603	0.415682	11.1665	6.59979e-07	9.87238e-06
AI597468|ENSMUSG00000060935	-0.0980933	6.32035	5.07447	0.0379308	0.614628	0.135194	6.32043	11.2638	0.00217001	0.0249631	78.6065	81.1385	-0.0457386	-1.55213	0.144131	0.231079
Aldh7a1|ENSMUSG00000053644	0.154842	6.56212	4.78339	0.0367116	0.611985	-0.152682	6.56218	5.29711	0.0285316	0.154828	91.9593	92.3754	-0.0065133	-0.155147	0.879097	0.915172
Alyref2|ENSMUSG00000060244	-0.337234	1.37226	11.2366	0.0201879	0.509232	0.314321	1.37211	11.2748	0.0203658	0.123817	2.72449	2.71809	0.00339331	0.0846327	0.933596	0.953432
Amn|ENSMUSG00000021278	0.843438	0.407311	18.7245	0.000155772	0.0530141	0.774237	0.407536	19.9694	0.000105187	0.00236774	0.611165	1.73418	-1.50462	-11.2395	9.92245e-09	3.70267e-07
Ampd2|ENSMUSG00000027889	-0.109835	6.04322	7.12265	0.0226184	0.528379	-0.210899	6.04324	28.6214	8.84315e-06	0.000317743	75.7251	60.691	0.319287	16.4523	7.91974e-11	1.17456e-08
Amz1|ENSMUSG00000050022	-0.170776	5.10332	4.61148	0.0400061	0.62067	0.254379	5.10354	11.6834	0.00184453	0.0221537	33.2974	35.2551	-0.0824232	-1.72964	0.109691	0.185044
Ankrd35|ENSMUSG00000038354	-0.398482	3.67015	9.60742	0.00420397	0.26885	-0.374138	3.67021	9.64338	0.00414518	0.0402111	17.0679	10.1433	0.750766	10.6726	4.8988e-07	7.72928e-06
Ankrd45|ENSMUSG00000044835	0.110542	5.44277	10.5797	0.0387561	0.615196	0.14383	5.44272	20.7996	0.00381328	0.0378033	38.296	46.2729	-0.272975	-12.1207	1.73141e-09	1.06916e-07
Ankrd63|ENSMUSG00000078137	-0.118483	7.41128	4.61882	0.039859	0.620476	-0.118005	7.41123	5.07824	0.0317444	0.16648	188.176	158.684	0.245932	9.02073	6.87948e-08	1.60017e-06
Anks1b|ENSMUSG00000058589	-0.21175	8.91202	8.6449	0.00627999	0.30456	-0.212846	8.91204	10.2191	0.00328125	0.03399	565.573	420.652	0.427086	11.6942	7.30886e-08	1.68648e-06
Ano3|ENSMUSG00000074968	-0.170593	9.1948	6.33802	0.0174237	0.500628	-0.337267	9.19464	30.2566	5.78838e-06	0.000223405	724.449	506.782	0.515518	15.2551	8.3965e-09	3.29629e-07
Aoah|ENSMUSG00000021322	-0.795256	-1.2125	5.1013	0.03138	0.57997	-0.929806	-1.21237	6.72709	0.0145797	0.0982755	0.831975	0.191045	2.12263	7.13883	6.05422e-06	5.90184e-05
Ap1s1|ENSMUSG00000004849	-0.157701	8.30209	13.1632	0.00105509	0.137573	-0.123249	8.30213	9.15355	0.00507475	0.04646	354.238	292.79	0.274851	17.2307	4.85251e-09	2.2033e-07
Arhgap42|ENSMUSG00000050730	0.170656	3.50517	5.25898	0.0408609	0.624723	0.306396	3.50534	19.1602	0.000135753	0.00290717	9.15973	12.7462	-0.476695	-12.5523	7.3315e-10	5.60424e-08
Arhgap6|ENSMUSG00000031355	0.126051	4.79852	4.70386	0.0439426	0.638081	0.330942	4.79866	36.4811	1.27996e-06	6.40913e-05	22.4514	30.9609	-0.463641	-16.8888	8.87315e-12	2.49595e-09
Armcx4|ENSMUSG00000049804	0.152216	5.9989	11.1221	0.00229145	0.197601	0.209203	5.99894	23.2865	3.868e-05	0.00105743	54.3549	70.0282	-0.365525	-12.8573	2.55382e-09	1.42935e-07
Arpc5|ENSMUSG00000008475	0.126859	4.86242	8.00023	0.0389872	0.616509	0.172042	4.8624	17.066	0.00275581	0.0297119	25.1432	31.1655	-0.309781	-13.2831	2.05545e-09	1.20568e-07
Asl|ENSMUSG00000025533	0.207365	3.64642	8.35321	0.0100952	0.390595	0.235157	3.64642	12.139	0.0016933	0.0207288	10.3064	14.0524	-0.447271	-11.4938	3.10319e-08	9.00445e-07
Ass1|ENSMUSG00000076441	-0.1632	3.53602	4.89408	0.047132	0.658887	0.158501	3.53613	5.15548	0.0408625	0.196476	11.8046	11.8151	-0.0012786	-0.0301745	0.976289	0.983305
Atg9b|ENSMUSG00000038295	0.317859	1.6989	5.27753	0.0287963	0.563902	-0.640947	1.69858	23.8423	3.29291e-05	0.000927142	3.4115	2.79647	0.286797	3.37346	0.00648897	0.0183711
Atp2b2|ENSMUSG00000030302	-0.094622	9.59241	4.20422	0.049199	0.669366	-0.339459	9.59234	62.1776	8.84013e-09	1.13305e-06	917.831	679.068	0.434673	19.4003	1.49215e-10	1.88991e-08
Atp2b4|ENSMUSG00000026463	0.234893	6.38165	5.95085	0.0208737	0.517309	0.466081	6.3819	26.3891	1.61012e-05	0.000518891	60.7532	98.1006	-0.691302	-9.81611	9.21782e-08	2.01445e-06
Atp6ap1l|ENSMUSG00000078958	0.172676	4.4488	8.16052	0.0133309	0.452433	0.60897	4.44888	125.646	3.27199e-12	2.08135e-09	15.1338	26.1506	-0.789072	-28.9806	1.37172e-15	1.75854e-11
Atp6v0c|ENSMUSG00000024121	0.494872	6.41287	10.5213	0.00290508	0.22184	-0.307051	6.41296	4.94702	0.0338605	0.173878	76.2991	87.243	-0.193374	-1.42489	0.185278	0.281419
B3gnt7|ENSMUSG00000079445	-0.495055	-0.220853	4.68637	0.0385324	0.615196	1.07692	-0.220627	26.3886	1.6103e-05	0.000518891	0.661711	0.954863	-0.529092	-4.2297	0.000787801	0.00322632
B430218F22Rik|ENSMUSG00000097411	0.710479	-1.62933	4.52233	0.0418425	0.631654	-0.716254	-1.62949	6.03336	0.0200867	0.122728	0.254722	0.239747	0.0874105	0.363124	0.722521	0.795002
Bag4|ENSMUSG00000037316	-0.126123	6.53069	9.37167	0.00625462	0.30456	-0.096661	6.53058	6.33055	0.0243023	0.139177	100.642	86.1949	0.223563	8.2912	2.84098e-06	3.22201e-05
Basp1|ENSMUSG00000045763	0.107389	6.84635	9.4575	0.0182777	0.506829	0.241539	6.84643	52.0175	5.20132e-08	4.6771e-06	98.9925	125.255	-0.339478	-12.4039	4.85779e-09	2.2033e-07
Bbs2|ENSMUSG00000031755	-0.114331	5.35969	8.46401	0.0356872	0.606969	-0.23385	5.35958	40.7328	4.33386e-06	0.000178928	47.4907	37.3516	0.346475	18.0286	1.87159e-12	9.02107e-10
Bcr|ENSMUSG00000009681	-0.123774	8.90904	12.0041	0.00620789	0.30456	-0.188794	8.90911	30.8376	8.10411e-06	0.000294879	546.94	440.271	0.312991	21.9278	1.68983e-12	8.88546e-10
Begain|ENSMUSG00000040867	0.149971	6.41268	9.26488	0.00484222	0.283245	0.263427	6.41291	32.3728	3.40466e-06	0.000148038	70.4908	93.496	-0.40747	-11.4315	2.4123e-07	4.33375e-06
Birc3|ENSMUSG00000032000	0.301543	1.74622	6.94878	0.0266515	0.553339	0.48389	1.74629	21.8918	8.94358e-05	0.00208864	2.29346	3.95585	-0.786461	-13.4666	2.93189e-10	3.02822e-08
Brinp3|ENSMUSG00000035131	0.284751	4.32741	9.98312	0.00360671	0.246277	0.224215	4.32746	7.32312	0.0111505	0.0815975	15.9359	22.5373	-0.500028	-9.02963	9.36023e-08	2.03023e-06
Brms1|ENSMUSG00000080268	-0.166401	4.58702	10.1203	0.011577	0.41834	-0.325216	4.58694	44.539	2.22905e-07	1.58689e-05	29.1669	20.9628	0.4765	16.8612	6.75462e-11	1.06956e-08
C2|ENSMUSG00000024371	-0.893706	-0.716367	12.2976	0.00145791	0.161207	0.589113	-0.716126	5.90198	0.0213666	0.127642	0.676106	0.541139	0.32125	2.74976	0.0142519	0.035186
Caap1|ENSMUSG00000028578	-0.184948	3.37247	7.50796	0.0283782	0.56264	0.158031	3.37243	6.20554	0.04608	0.212259	10.5744	10.4471	0.0174774	0.415586	0.684196	0.765737
Cacna2d1|ENSMUSG00000040118	0.149043	5.94836	11.8618	0.00240978	0.200491	-0.208977	5.94812	26.5961	1.52146e-05	0.000497736	61.683	59.3997	0.0544161	1.90376	0.0756918	0.137099
Cacnb1|ENSMUSG00000020882	-0.12963	7.40961	9.75796	0.00395273	0.262527	-0.0884169	7.40968	4.96161	0.0342716	0.175183	188.278	161.114	0.224785	7.57893	8.10911e-07	1.16674e-05
Cacng4|ENSMUSG00000020723	-0.104585	7.56657	4.26365	0.047722	0.660669	0.15514	7.56681	10.4926	0.00294073	0.0312243	186.115	193.839	-0.0586625	-2.51034	0.0233925	0.0526741
Calm2|ENSMUSG00000036438	-0.138546	10.7134	8.57716	0.00646312	0.307016	-0.095885	10.7133	4.98393	0.0332499	0.171708	1860.89	1579.64	0.2364	9.60984	7.92685e-07	1.14855e-05
Camk2b|ENSMUSG00000057897	-0.0918233	10.2612	4.4339	0.0472754	0.659238	-0.296761	10.2611	50.8975	6.41042e-08	5.67521e-06	1433.03	1090.43	0.39417	25.3445	6.30818e-15	2.73649e-11
Camk2n1|ENSMUSG00000046447	-0.147573	10.8758	5.91627	0.0212165	0.520241	-0.123104	10.8759	4.8882	0.0348589	0.177288	2106.57	1752.52	0.265466	7.5405	9.46442e-06	8.52239e-05
Camk4|ENSMUSG00000038128	-0.128101	9.78982	5.41113	0.0269935	0.556729	0.148501	9.78993	8.69104	0.00616197	0.0535587	878.274	894.046	-0.0256767	-0.845361	0.410237	0.524339
Camkv|ENSMUSG00000032936	-0.101692	9.6961	4.88264	0.0349468	0.599971	-0.122309	9.69614	7.77851	0.0091224	0.0708766	908.929	776.821	0.226585	11.3377	1.72924e-08	5.66146e-07
Caprin2|ENSMUSG00000030309	0.186659	3.10584	5.1888	0.0385016	0.615196	0.283983	3.10582	13.4234	0.000959855	0.0135238	6.99993	9.78345	-0.483003	-10.424	9.17179e-09	3.51322e-07
Caskin1|ENSMUSG00000033597	0.110278	6.51789	8.451	0.0163356	0.498177	-0.201332	6.51794	31.8517	3.87306e-06	0.000163842	94.1291	88.6423	0.0866453	3.77896	0.00298328	0.00960763
Ccdc108|ENSMUSG00000047021	0.603713	1.65685	11.5345	0.00195185	0.182802	0.505035	1.65646	10.5612	0.00286143	0.0306391	2.00114	4.28603	-1.09882	-9.5929	7.76684e-08	1.76508e-06
Ccdc155|ENSMUSG00000038292	-0.404764	0.944953	6.20848	0.0185031	0.508152	0.73693	0.945375	22.1437	5.41699e-05	0.00138861	1.69536	2.14529	-0.339578	-2.8897	0.0101968	0.0266229
Ccdc19|ENSMUSG00000026546	0.633157	0.419799	5.90751	0.0213043	0.521619	0.763143	0.419799	11.8483	0.00173139	0.0211348	0.694946	1.641	-1.23961	-11.0124	1.2027e-08	4.2765e-07
Ccdc39|ENSMUSG00000027676	0.166334	4.56596	8.90576	0.0122411	0.4308	0.187974	4.56596	13.0332	0.00246109	0.0272003	20.2794	26.014	-0.359272	-12.1347	9.97762e-10	7.00938e-08
Cd200|ENSMUSG00000022661	0.205562	6.07037	32.5884	2.25978e-05	0.0189514	0.201497	6.07023	37.0029	8.61468e-06	0.000310834	55.6718	74.4947	-0.420191	-15.0442	4.55552e-10	4.01256e-08
Cd4|ENSMUSG00000023274	-0.138788	6.65617	4.76017	0.0371386	0.612374	-0.479192	6.65606	69.5072	2.77568e-09	4.58387e-07	127.818	83.364	0.616592	17.4011	3.49972e-09	1.76021e-07
Cdcp1|ENSMUSG00000035498	-0.775369	0.344628	8.62542	0.00633207	0.30456	-0.789847	0.344685	9.7866	0.00390946	0.0385226	2.29904	0.763959	1.58946	8.92122	1.18233e-05	0.000102375
Cdh10|ENSMUSG00000022321	0.212337	5.35032	14.9791	0.000548468	0.104447	0.210702	5.35028	17.6378	0.000222217	0.00425481	33.5836	45.255	-0.430321	-13.8822	4.10202e-10	3.76605e-08
Cdh18|ENSMUSG00000040420	0.24474	3.42815	8.30007	0.00727468	0.324689	0.463962	3.42815	33.7134	2.45632e-06	0.0001128	7.92075	12.9845	-0.71308	-12.5971	1.4105e-09	9.06481e-08
Cdh23|ENSMUSG00000012819	0.548234	0.224557	6.49927	0.0161749	0.495039	-0.588126	0.224606	8.246	0.00744947	0.0612762	0.999147	1.00548	-0.00911682	-0.0689152	0.946075	0.962099
Cdk14|ENSMUSG00000028926	0.351494	5.81262	11.3479	0.00209823	0.192308	0.201375	5.81251	4.22036	0.0488022	0.22011	46.5832	66.1622	-0.506199	-10.2727	1.65793e-08	5.47971e-07
Cdk19|ENSMUSG00000038481	-0.160666	7.45889	17.6868	0.000350469	0.0785836	0.106737	7.45897	9.06301	0.011441	0.0830862	181.265	174.722	0.0530414	2.58923	0.0194192	0.0453332
Cdk2ap1|ENSMUSG00000029394	-0.23273	3.47176	8.74338	0.00602369	0.30456	0.208262	3.47206	8.0056	0.00826386	0.0659534	11.158	11.0161	0.0184544	0.637633	0.538458	0.644479
Cenpb|ENSMUSG00000068267	0.0964141	7.10522	7.12489	0.0324889	0.583708	-0.130999	7.10517	15.5376	0.00188617	0.0225591	138.644	135.536	0.032711	1.49035	0.16274	0.254197
Cgref1|ENSMUSG00000029161	-0.142556	4.80938	7.81763	0.0237472	0.534826	0.466569	4.80965	96.605	7.3184e-11	2.51387e-08	24.561	30.5832	-0.316368	-12.0513	5.01095e-08	1.25288e-06
Chd3|ENSMUSG00000018474	0.162462	9.39668	8.62804	0.00632504	0.30456	0.35035	9.39693	43.7291	2.63312e-07	1.79459e-05	529.101	754.037	-0.511093	-15.3562	3.01686e-10	3.04724e-08
Chn1|ENSMUSG00000056486	-0.160488	10.0566	8.18195	0.00765361	0.334504	-0.171981	10.0566	11.1531	0.00226575	0.025771	1221.05	968.257	0.334654	13.1495	1.33878e-07	2.6877e-06
Ckmt1|ENSMUSG00000000308	-0.136223	7.15404	18.58	0.00231891	0.197714	-0.084699	7.15402	8.14008	0.0425212	0.201845	156.104	134.019	0.220076	12.1369	8.95649e-10	6.48329e-08
Clcf1|ENSMUSG00000040663	0.70683	0.472853	6.46692	0.0164174	0.498337	1.72919	0.47344	55.0712	2.98502e-08	3.08842e-06	0.439867	2.16667	-2.30034	-14.0126	2.56183e-09	1.42935e-07
Cldn26|ENSMUSG00000022715	-1.0331	-0.0497091	12.2014	0.00151204	0.16185	0.704898	-0.0492355	6.3192	0.0175823	0.111926	1.04085	0.888877	0.22771	2.0309	0.0589854	0.112178
Cntn5|ENSMUSG00000039488	-0.289414	4.18478	12.1699	0.00153017	0.16185	0.18767	4.18483	5.67071	0.023842	0.137181	19.3311	17.9282	0.108691	1.60892	0.130529	0.21323
Cntnap1|ENSMUSG00000017167	-0.0972682	8.3407	4.71366	0.0380104	0.614628	-0.332876	8.34068	62.248	8.73847e-09	1.12845e-06	386.955	287.765	0.427278	17.1587	2.69311e-09	1.48001e-07
Cntnap2|ENSMUSG00000039419	0.117528	6.69307	4.79845	0.0364375	0.611985	-0.374296	6.69288	55.5779	2.72765e-08	2.90978e-06	112.244	94.0281	0.255476	7.71562	3.36881e-06	3.66952e-05
Coch|ENSMUSG00000020953	-0.297486	7.44623	6.25756	0.0180858	0.505157	0.357387	7.44662	10.6053	0.00281173	0.0302011	170.113	182.905	-0.104601	-1.78325	0.0927842	0.161267
Col11a1|ENSMUSG00000027966	0.295321	3.0988	5.58279	0.0248568	0.544738	0.746541	3.09899	40.3475	5.39137e-07	3.193e-05	5.32095	10.8915	-1.03345	-16.5986	3.22143e-10	3.17604e-08
Col6a4|ENSMUSG00000032572	0.740423	3.48875	4.22104	0.0487761	0.668779	-1.04289	3.48909	9.03764	0.00532622	0.0481716	11.0411	9.2659	0.252886	1.06458	0.303999	0.415976
Col6a6|ENSMUSG00000043719	-0.818767	-1.62431	4.90494	0.0345634	0.597761	0.977452	-1.62459	8.67227	0.00621112	0.0537174	0.332903	0.339028	-0.0263038	-0.120037	0.90594	0.934402
Coro2a|ENSMUSG00000028337	-0.209945	3.81409	9.28987	0.00703815	0.319965	0.152321	3.81433	5.53268	0.0379428	0.186825	14.2069	13.6849	0.0540022	1.19443	0.249073	0.355187
Coro2b|ENSMUSG00000041729	-0.10569	8.09718	5.17415	0.0302821	0.575172	0.167699	8.09739	14.4091	0.000672059	0.0101161	264.366	276.564	-0.0650761	-3.21866	0.00658594	0.0186032
Cpne9|ENSMUSG00000030270	-0.548455	4.19147	4.43432	0.0437475	0.638081	1.03336	4.19232	17.3772	0.000242205	0.00456126	13.8274	20.2021	-0.546972	-4.83674	0.000175445	0.000936717
Crabp1|ENSMUSG00000032291	-0.245299	3.23931	10.2291	0.00592992	0.30429	0.609216	3.23965	71.039	2.20303e-09	3.90073e-07	7.97192	10.3928	-0.382592	-6.72674	1.3646e-05	0.000114611
Crebbp|ENSMUSG00000022521	0.196433	5.79923	10.2703	0.00321206	0.230369	-0.165639	5.79921	8.30632	0.00725904	0.0603394	53.9262	55.2676	-0.035449	-1.16577	0.265657	0.373768
Crebrf|ENSMUSG00000048249	-0.112234	6.63662	12.4173	0.014315	0.461174	-0.146772	6.63651	25.9088	0.000606522	0.00942716	110.904	92.5294	0.261323	17.807	6.28432e-10	5.04841e-08
Crip2|ENSMUSG00000006356	-0.113594	6.69828	5.60721	0.0245682	0.543323	-0.148967	6.69836	11.0244	0.00238287	0.0267139	114.693	95.471	0.264639	14.4724	1.58758e-10	1.98185e-08
Cxx1c|ENSMUSG00000051851	0.152082	6.96855	12.2533	0.00148256	0.161845	-0.0985341	6.96842	6.03424	0.0200784	0.122728	121.233	125.69	-0.0520812	-1.81009	0.0896887	0.156978
Cyld|ENSMUSG00000036712	-0.110557	9.0848	5.09407	0.0314912	0.57997	-0.279202	9.08465	38.2163	8.6285e-07	4.63108e-05	641.746	485.714	0.401894	14.4362	1.30784e-08	4.55693e-07
D930048G16Rik|ENSMUSG00000097732	0.548618	1.34346	23.227	0.000230151	0.0634519	-0.344171	1.34334	11.3798	0.0102547	0.0771779	2.34115	2.65994	-0.184178	-2.8138	0.0134278	0.0335348
Dapp1|ENSMUSG00000028159	0.272349	3.48957	6.37862	0.0170996	0.500628	-0.30191	3.48959	8.95654	0.00551015	0.0494445	10.8995	10.9055	-0.000791531	-0.0119511	0.990609	0.993381
Dbi|ENSMUSG00000026385	-0.10774	6.60471	11.6572	0.0188562	0.508495	0.152219	6.60477	25.667	0.00042665	0.00715597	95.6323	98.734	-0.0460485	-3.10168	0.00648373	0.0183623
Dbpht2|ENSMUSG00000029878	-0.232919	6.30486	8.99393	0.00542124	0.290784	0.190822	6.30506	6.83284	0.0138958	0.0948949	81.0586	79.1076	0.0351492	0.762271	0.457329	0.570658
Ddit3|ENSMUSG00000025408	-0.137372	4.47287	6.62906	0.0428675	0.633368	0.205387	4.47297	16.9629	0.00120867	0.0161548	22.1026	23.1052	-0.064002	-1.98078	0.0667299	0.124051
Ddit4l|ENSMUSG00000046818	-0.645056	3.35752	14.5373	0.000641267	0.111017	0.349159	3.35815	4.89347	0.0347683	0.176932	10.5221	9.3655	0.167992	2.27063	0.0370537	0.0770561
Dleu7|ENSMUSG00000048281	0.248974	2.21076	5.06136	0.0387661	0.615196	0.919836	2.21082	84.5867	3.29273e-10	8.31655e-08	2.78223	6.113	-1.13564	-14.5934	6.84191e-11	1.06956e-08
Dlg5|ENSMUSG00000021782	0.129108	4.94091	4.17759	0.0498774	0.66942	0.191375	4.94102	10.8094	0.00259331	0.0283514	26.5902	33.2499	-0.322455	-12.1721	1.02824e-09	7.16337e-08
Dmkn|ENSMUSG00000060962	-0.420635	4.74204	26.3168	1.63784e-05	0.015595	0.812187	4.74247	107.662	2.07397e-11	9.4034e-09	22.0288	29.7928	-0.435572	-9.50917	3.69297e-08	1.01263e-06
Dock4|ENSMUSG00000035954	-0.18159	7.85013	16.7434	0.00029887	0.0731761	-0.117396	7.8501	7.98171	0.00834994	0.0664551	264.295	214.617	0.300382	11.1627	2.22293e-07	4.07742e-06
Dok4|ENSMUSG00000040631	-0.238614	4.75325	11.3747	0.00207651	0.192308	-0.14858	4.75329	5.106	0.0313157	0.164896	31.7305	24.32	0.383728	8.63034	3.47275e-07	5.81652e-06
Dsg1c|ENSMUSG00000034774	0.548003	3.14267	16.0234	0.000381668	0.0808504	0.661848	3.1428	27.7993	1.0995e-05	0.000382265	4.34693	11.3959	-1.39045	-18.3783	1.48727e-12	8.53089e-10
Dsg2|ENSMUSG00000044393	0.941597	1.67056	35.9235	1.45039e-06	0.00497163	0.447534	1.67037	10.1694	0.00334759	0.034428	1.43344	3.99983	-1.48046	-22.5035	8.22993e-14	1.49118e-10
Dtwd1|ENSMUSG00000023330	-0.278273	3.02677	13.4009	0.00296383	0.222794	0.212552	3.02665	9.23528	0.014519	0.098059	8.58443	8.28989	0.0503687	1.06599	0.304458	0.416375
Dusp18|ENSMUSG00000047205	-0.216857	3.97511	9.10034	0.00518539	0.287551	-0.261195	3.97504	15.37	0.000478961	0.00781953	18.827	13.4372	0.48657	10.3561	1.12606e-07	2.34849e-06
DXBay18|ENSMUSG00000071745	-0.907757	-1.71579	6.08393	0.0196102	0.509232	1.39214	-1.71566	16.5097	0.000323883	0.00574659	0.250108	0.326441	-0.384274	-2.00378	0.068312	0.126356
E530001K10Rik|ENSMUSG00000075020	0.335642	2.48176	7.19251	0.0118139	0.423595	0.706467	2.48196	38.9472	7.33072e-07	4.08783e-05	3.37394	7.04205	-1.06156	-13.8503	1.94355e-09	1.17099e-07
Efnb3|ENSMUSG00000003934	-0.0994664	7.75749	6.78101	0.0266166	0.553339	0.121769	7.75755	11.2356	0.00409313	0.0398523	212.737	216.609	-0.0260217	-1.08826	0.296354	0.407928
Elmod1|ENSMUSG00000041986	-0.144598	9.19269	11.2655	0.00216663	0.194967	-0.0886176	9.19265	4.95203	0.0371501	0.184036	648.364	549.729	0.238084	13.9395	1.98705e-07	3.71913e-06
Ephb2|ENSMUSG00000028664	0.22461	2.59008	4.29916	0.0468631	0.656735	0.279761	2.59021	7.55971	0.0100418	0.0759437	4.7555	6.62593	-0.478524	-6.74709	3.60606e-06	3.87788e-05
Ephb6|ENSMUSG00000029869	0.130598	6.27967	7.0826	0.0124101	0.434076	-0.2302	6.27948	24.4822	2.74181e-05	0.000803594	80.446	75.6505	0.08867	2.76687	0.0136098	0.0338969
Epor|ENSMUSG00000006235	-0.217523	3.55342	5.04477	0.0322619	0.583701	-0.262633	3.55335	8.18602	0.00764417	0.0624589	14.0438	10.2038	0.460828	8.0616	9.44275e-07	1.31185e-05
Eps8|ENSMUSG00000015766	-0.145758	4.66354	8.33935	0.0233914	0.532473	0.178071	4.66372	14.1725	0.00322785	0.0335583	25.2096	25.7836	-0.0324799	-1.22964	0.246556	0.352118
Espn|ENSMUSG00000028943	-0.648284	-1.51568	5.03414	0.0324308	0.583708	-0.586006	-1.51577	4.67161	0.0388266	0.189607	0.493218	0.231657	1.09024	7.00016	1.83738e-05	0.000145971
Faah|ENSMUSG00000034171	0.241821	4.46512	10.4892	0.00294258	0.222794	0.427989	4.46508	38.5564	7.9965e-07	4.38786e-05	16.1696	26.1329	-0.692587	-17.1293	6.26911e-12	2.17563e-09
Fam155a|ENSMUSG00000079157	0.150087	4.98816	7.20054	0.0123953	0.434076	0.216523	4.98819	17.6903	0.000218409	0.00419755	26.8781	34.6919	-0.368169	-12.0753	3.25835e-08	9.31449e-07
Fam186a|ENSMUSG00000045350	0.729408	-1.89887	5.29396	0.0285676	0.56264	-1.27431	-1.89905	16.775	0.000296146	0.0053653	0.225393	0.171016	0.398312	2.35184	0.0327549	0.069499
Fam57b|ENSMUSG00000058966	0.159149	4.71288	5.87547	0.0216287	0.521742	0.314554	4.71302	26.5811	1.52769e-05	0.00049863	21.4677	29.3885	-0.453084	-15.6751	3.09601e-08	8.99867e-07
Fam81a|ENSMUSG00000032224	0.181814	5.18573	6.91061	0.0134098	0.452527	0.62597	5.18594	94.5271	9.39112e-11	3.10178e-08	25.248	42.7937	-0.76123	-16.887	1.97952e-10	2.28991e-08
Fam84a|ENSMUSG00000020607	0.138825	6.14207	10.8501	0.00351922	0.243967	-0.184323	6.14192	21.8919	5.84052e-05	0.00147084	69.7297	67.4517	0.0479192	1.81414	0.0931979	0.161733
Faxc|ENSMUSG00000028246	0.132351	5.35438	6.35219	0.0173098	0.500628	-0.123096	5.35425	6.35452	0.0172973	0.110893	39.9159	40.174	-0.00929777	-0.287356	0.778141	0.83933
Fbxl22|ENSMUSG00000050503	0.595237	-0.907965	5.96852	0.0367784	0.611985	0.694922	-0.907695	10.9537	0.00480256	0.0445618	0.262002	0.64071	-1.29009	-11.4772	1.07763e-08	3.98344e-07
Fcho1|ENSMUSG00000070000	-0.102031	6.38573	5.3445	0.0293783	0.568943	-0.128328	6.38585	9.31277	0.00475003	0.0444104	91.5452	78.7476	0.217248	6.4547	9.26791e-06	8.37151e-05
Ffar3|ENSMUSG00000019429	-0.652184	-0.533886	8.74689	0.00601477	0.30456	-1.9141	-0.534334	81.6096	4.89893e-10	1.15259e-07	1.36313	0.222131	2.61745	12.308	2.78441e-06	3.17489e-05
Fgf17|ENSMUSG00000022101	-0.827613	-0.441773	11.1989	0.00222371	0.194967	0.870226	-0.441322	13.2572	0.00102024	0.0141769	0.677609	0.719442	-0.0864267	-0.896023	0.383012	0.498203
Fgf3|ENSMUSG00000031074	-0.448943	3.2063	11.109	0.00230327	0.197601	0.47604	3.2067	14.5275	0.000644293	0.00984991	9.08113	9.53845	-0.0708828	-0.973914	0.348405	0.463082
Fibcd1|ENSMUSG00000026841	-0.334316	3.89498	37.4352	7.99366e-06	0.0123806	-0.540956	3.89478	110.4	1.54209e-11	7.56724e-09	21.4659	11.7464	0.869833	20.6153	2.25493e-10	2.54075e-08
Fig4|ENSMUSG00000038417	-0.124149	5.75277	6.54956	0.0158057	0.490598	0.125129	5.75282	7.30773	0.0112271	0.081955	53.327	53.359	-0.000865564	-0.0273786	0.978478	0.984663
Flna|ENSMUSG00000031328	0.153956	7.25647	12.7241	0.00124197	0.150966	0.129805	7.25681	9.70848	0.00403619	0.039432	134.132	166.668	-0.313315	-12.5705	6.86288e-10	5.41294e-08
Fmnl1|ENSMUSG00000055805	-0.170989	6.19787	9.00682	0.00539208	0.290784	-0.145711	6.198	7.40533	0.0107509	0.0796123	85.9478	69.4767	0.306932	7.8412	6.04949e-07	9.18306e-06
Fnbp1l|ENSMUSG00000039735	-0.100339	8.21209	4.19268	0.0494919	0.66942	-0.094047	8.21204	4.27263	0.0475126	0.216262	324.337	283.044	0.196469	6.21339	1.26312e-05	0.000108128
Fndc9|ENSMUSG00000048721	-0.306594	3.94919	7.88282	0.00871231	0.357226	0.389418	3.94946	14.5088	0.000648578	0.00988381	13.6851	15.843	-0.211234	-2.53217	0.0248762	0.0554351
Frem2|ENSMUSG00000037016	0.266525	3.85057	5.03039	0.0324906	0.583708	0.314582	3.85062	8.03072	0.0081744	0.0654427	10.818	16.1832	-0.581054	-7.42707	2.64943e-06	3.04861e-05
Frem3|ENSMUSG00000042353	1.12971	1.13358	11.9279	0.00167793	0.169165	2.20445	1.13443	71.8086	1.96417e-09	3.62739e-07	0.268646	3.17743	-3.56408	-15.6553	1.85293e-11	4.12205e-09
Frrs1l|ENSMUSG00000045589	-0.114246	8.49488	5.27039	0.0288964	0.564212	-0.147293	8.49478	10.446	0.00299597	0.0316262	402.925	335.933	0.26234	9.27315	2.57334e-06	2.98003e-05
Fsbp|ENSMUSG00000094595	-0.263988	3.00861	7.38725	0.0108326	0.401865	-0.43909	3.00839	24.7666	2.52938e-05	0.000754202	10.4542	6.44563	0.69769	12.0847	2.89037e-08	8.50146e-07
Fut11|ENSMUSG00000039357	-0.166054	3.96925	7.78775	0.0258272	0.550333	-0.29154	3.96927	27.0654	2.93179e-05	0.000844857	18.852	13.6001	0.4711	15.7502	6.93605e-11	1.07459e-08
Gabra3|ENSMUSG00000031343	0.219771	5.81217	17.0042	0.000273822	0.0690152	0.400369	5.81237	63.5558	7.06009e-09	9.62358e-07	41.6043	63.6339	-0.613062	-17.2344	3.47929e-12	1.37211e-09
Gabra5|ENSMUSG00000055078	0.174224	4.77556	6.14552	0.019054	0.508495	0.476935	4.77573	52.9571	4.37464e-08	4.13675e-06	20.3642	31.6726	-0.637195	-12.6882	3.34779e-08	9.47649e-07
Gabrd|ENSMUSG00000029054	-0.137963	6.99178	5.70159	0.0234869	0.532473	-0.342246	6.99172	41.7335	4.00215e-07	2.47255e-05	154.513	110.792	0.479872	16.7735	1.57032e-08	5.26735e-07
Galns|ENSMUSG00000015027	0.264776	2.22354	7.06484	0.0240869	0.539851	0.473981	2.22364	25.8346	1.87589e-05	0.00059225	3.40694	5.58847	-0.713977	-11.3957	3.99582e-08	1.0667e-06
Galnt16|ENSMUSG00000021130	0.0962449	6.62664	6.37301	0.0357691	0.607578	0.408745	6.62679	126.408	3.04035e-12	2.08135e-09	78.7277	111.712	-0.504834	-20.0871	5.75315e-13	4.34037e-10
Galnt18|ENSMUSG00000038296	-0.130997	5.01308	8.02953	0.0257716	0.550333	-0.17994	5.01302	16.7314	0.00113174	0.0153415	36.6598	29.6728	0.305059	11.0644	3.99283e-09	1.90377e-07
Gatsl2|ENSMUSG00000015944	0.0963523	7.17054	5.68745	0.0308486	0.577846	0.106696	7.17069	7.7567	0.0111296	0.0814793	130.824	151.291	-0.209705	-9.16996	1.04729e-07	2.23054e-06
Gdap1l1|ENSMUSG00000017943	0.12499	5.03595	4.55624	0.0411331	0.62665	0.250936	5.03603	20.9635	7.73606e-05	0.00185309	27.9356	36.0095	-0.366269	-11.5796	2.05308e-09	1.20568e-07
Gdnf|ENSMUSG00000022144	0.219273	2.90316	6.71184	0.0253558	0.548041	0.360622	2.90339	21.3503	7.31689e-05	0.00177213	5.41834	8.29742	-0.61481	-11.6269	9.85603e-08	2.12186e-06
Ghitm|ENSMUSG00000041028	-0.0952211	9.24102	6.99219	0.0368954	0.612374	-0.114147	9.24092	11.9506	0.00738795	0.0609325	663.523	573.599	0.210106	13.2814	1.04441e-09	7.22013e-08
Gipc2|ENSMUSG00000039131	-0.358741	2.63383	11.23	0.00219681	0.194967	-0.252436	2.63381	6.17896	0.0187656	0.117157	8.22667	5.36924	0.615589	10.6067	6.09771e-08	1.45572e-06
Glb1|ENSMUSG00000045594	0.158615	3.77485	5.99295	0.0444331	0.641099	0.249275	3.77496	16.5259	0.000728626	0.010816	11.6077	15.1896	-0.388002	-11.2868	3.99362e-09	1.90377e-07
Gli3|ENSMUSG00000021318	-0.178899	4.95499	6.17184	0.0188215	0.508495	0.173084	4.95524	6.66176	0.0150204	0.100418	32.051	31.8379	0.00962539	0.196375	0.847175	0.891514
Glra2|ENSMUSG00000018589	0.157438	4.07475	6.04649	0.0329687	0.587804	0.406969	4.07481	45.2797	1.91723e-07	1.39527e-05	13.1842	19.4901	-0.563932	-16.1138	2.84291e-09	1.53199e-07
Gm10709|ENSMUSG00000074516	0.84181	2.15731	5.44768	0.0265223	0.553339	-0.697576	2.15731	4.45971	0.0431971	0.203654	3.82835	4.2074	-0.136209	-0.908729	0.37719	0.492253
Gm11353|ENSMUSG00000060198	-0.246758	2.5795	9.7177	0.0183554	0.506829	0.233812	2.57953	9.63363	0.0171854	0.110478	6.26485	6.25101	0.00319174	0.0751191	0.941108	0.958503
Gm11542|ENSMUSG00000085051	1.01949	-2.30271	5.05491	0.0321017	0.583701	-0.854664	-2.30274	4.54885	0.0412955	0.197949	0.126469	0.139923	-0.145846	-0.502108	0.622231	0.714226
Gm11641|ENSMUSG00000085733	0.494141	-0.0962847	5.62985	0.0243039	0.541723	-0.827524	-0.0965873	18.9293	0.000146127	0.00306457	0.977594	0.769004	0.346244	2.45097	0.0282792	0.0614451
Gm11953|ENSMUSG00000082816	1.17271	-2.20783	8.10444	0.00791384	0.340792	-0.805774	-2.20795	4.78441	0.0367014	0.18255	0.149333	0.188662	-0.337272	-1.09005	0.301325	0.413098
Gm12060|ENSMUSG00000085415	-0.621343	0.206696	9.75755	0.00395339	0.262527	0.391016	0.206571	4.44898	0.0434325	0.204539	1.29164	1.11321	0.214472	1.49853	0.157259	0.247664
Gm12184|ENSMUSG00000078154	-0.310961	3.89349	11.3601	0.00208835	0.192308	0.273775	3.89374	10.0698	0.00348478	0.035373	15.2537	14.8652	0.0372234	0.926276	0.368654	0.48355
Gm12216|ENSMUSG00000081769	0.750007	-1.5743	5.73617	0.0231039	0.531139	-0.653776	-1.57424	5.3934	0.027233	0.15025	0.25672	0.260708	-0.0222421	-0.0973706	0.923571	0.94648
Gm12583|ENSMUSG00000082878	0.858829	-1.06693	7.04812	0.0126039	0.43817	-0.714612	-1.06708	5.69778	0.0235366	0.136233	0.359094	0.407902	-0.183861	-0.827842	0.419342	0.533228
Gm13139|ENSMUSG00000067916	-0.424123	1.31638	4.5231	0.0418263	0.631654	0.460041	1.31656	5.94141	0.0209733	0.126174	2.54132	2.60262	-0.0343878	-0.267203	0.793332	0.850799
Gm136|ENSMUSG00000071015	0.701118	-1.08494	4.90594	0.0345462	0.597761	-1.00473	-1.08515	11.9505	0.00166503	0.0205438	0.438132	0.327836	0.41839	2.02866	0.0596892	0.113293
Gm17322|ENSMUSG00000097604	0.348041	1.97665	8.62521	0.00633263	0.30456	-0.486106	1.97628	20.5651	8.74282e-05	0.00205134	3.86665	3.62926	0.0914075	1.57473	0.135154	0.2193
Gm20489|ENSMUSG00000092463	-0.589812	-0.859829	6.60059	0.0284535	0.56264	0.848322	-0.859583	15.7165	0.000752348	0.0111585	0.454872	0.567569	-0.319336	-3.00887	0.00810883	0.0221268
Gm20708|ENSMUSG00000093485	0.379124	0.869392	4.18311	0.049736	0.66942	1.01181	0.86964	36.7887	1.19261e-06	6.02442e-05	1.01325	2.47261	-1.28704	-14.3661	1.47896e-10	1.88991e-08
Gm26645|ENSMUSG00000097684	-0.499804	3.52992	9.10778	0.00516933	0.287551	0.348601	3.53024	5.21778	0.0296528	0.159202	13.0286	11.4948	0.180705	1.92501	0.0861619	0.151977
Gm2986|ENSMUSG00000083700	-1.13982	-1.82946	10.8807	0.00251938	0.204643	0.859498	-1.82932	6.69757	0.014777	0.099255	0.340205	0.282307	0.269138	1.74952	0.099802	0.171157
Gm3756|ENSMUSG00000091639	-0.588541	-0.896338	7.1462	0.0234366	0.532473	0.734104	-0.896313	12.6021	0.00256504	0.028114	0.519579	0.577947	-0.153593	-1.2938	0.215354	0.316546
Gm5111|ENSMUSG00000052730	-0.396294	0.536984	4.29213	0.0470318	0.658103	-0.674828	0.536548	14.6465	0.000617616	0.00956498	2.14928	1.07735	0.996358	8.26221	1.08514e-05	9.56489e-05
Gm5424|ENSMUSG00000046687	-0.134011	6.04009	6.62814	0.0152471	0.481253	0.116445	6.04017	5.53643	0.0254222	0.143438	66.0148	65.443	0.0125502	0.430287	0.67256	0.756652
Gm5900|ENSMUSG00000094685	-0.285893	3.56417	6.07283	0.0197124	0.509232	0.309194	3.5642	7.97407	0.00837765	0.0666448	12.0964	12.2617	-0.0195786	-0.273711	0.788868	0.847548
Gm6104|ENSMUSG00000062588	-0.196566	3.02156	5.89574	0.0341589	0.597761	0.211793	3.02156	7.84505	0.0141429	0.0960475	8.04585	8.19115	-0.0258212	-0.504123	0.620647	0.712784
Gm6382|ENSMUSG00000082675	-0.140068	4.27783	8.35738	0.046363	0.654825	0.175207	4.27785	14.8319	0.00782593	0.063431	19.4201	19.9275	-0.0372102	-1.21414	0.248379	0.35446
Gm6969|ENSMUSG00000066553	-0.373583	4.21895	8.30227	0.00726781	0.324689	0.547424	4.21883	19.7679	0.000112037	0.00249902	18.3373	20.9481	-0.192038	-2.75995	0.0173172	0.0411909
Gm7244|ENSMUSG00000091003	-0.448364	-0.0938477	4.88958	0.034827	0.599344	-1.49397	-0.0941389	57.9017	1.81642e-08	2.1079e-06	1.72299	0.416879	2.04721	26.1603	8.91822e-12	2.49595e-09
Gm8121|ENSMUSG00000051116	-0.163611	3.63665	8.24394	0.043025	0.633664	0.269921	3.63668	26.2498	0.000354813	0.00614305	12.1807	13.1891	-0.114756	-4.27945	0.000507473	0.00226892
Gm8995|ENSMUSG00000063286	-0.224453	2.51874	5.68303	0.0345171	0.597761	0.231409	2.51884	6.76301	0.0224869	0.131903	5.83984	5.90359	-0.0156627	-0.326689	0.748159	0.816225
Gm9083|ENSMUSG00000083033	-0.708113	-1.09396	5.34066	0.0279285	0.56264	0.634926	-1.09382	4.77907	0.036799	0.182824	0.504446	0.497404	0.0202815	0.114118	0.910751	0.938165
Gm996|ENSMUSG00000029419	-0.10124	6.63988	6.10816	0.026982	0.556729	-0.164785	6.63999	17.9848	0.000198306	0.00390585	110.572	92.866	0.25176	9.83358	7.99116e-08	1.80655e-06
Gng3|ENSMUSG00000071658	0.22416	6.44058	17.3102	0.000247266	0.0660284	0.168071	6.44051	11.2319	0.0021971	0.0251735	72.6191	95.2941	-0.392039	-12.8558	2.0321e-08	6.41109e-07
Gnpda1|ENSMUSG00000052102	0.215564	3.78429	10.3843	0.00544981	0.290979	-0.413203	3.78421	43.7698	2.61106e-07	1.78665e-05	14.1923	12.4183	0.192637	4.42865	0.000730956	0.00304431
Gpatch11|ENSMUSG00000050668	-0.12788	5.30861	4.27521	0.0474405	0.659238	0.214371	5.30842	13.668	0.000877834	0.0125955	39.123	41.3075	-0.0783887	-2.11496	0.0607541	0.115025
Gpcpd1|ENSMUSG00000027346	-0.113918	7.17991	4.53152	0.041649	0.631654	-0.227681	7.17973	22.0011	5.65266e-05	0.00143404	166.333	131.81	0.335616	11.0764	3.4197e-09	1.73505e-07
Gpd1|ENSMUSG00000023019	-0.359886	5.73557	37.7521	9.53799e-07	0.00497163	-0.385277	5.73551	49.3806	8.54904e-08	7.34149e-06	72.4856	42.9534	0.754922	21.5972	8.5937e-14	1.49118e-10
Gpd2|ENSMUSG00000026827	0.14736	6.72516	13.711	0.00140731	0.158521	0.350941	6.72532	89.3702	1.77672e-10	5.00249e-08	84.1258	117.911	-0.487083	-23.2409	7.20504e-11	1.09668e-08
Gpr1|ENSMUSG00000046856	0.629688	-0.695988	8.54408	0.0110376	0.406117	-0.691514	-0.696062	11.871	0.00275523	0.0297119	0.490138	0.488281	0.00547666	0.0337996	0.973661	0.981182
Gpr149|ENSMUSG00000043441	0.231592	3.39914	4.41277	0.0442286	0.640231	0.303705	3.39876	8.3557	0.0071071	0.059378	7.82137	11.9924	-0.616626	-9.93037	6.92818e-08	1.60934e-06
Gpr150|ENSMUSG00000045509	0.695558	-0.374816	7.98356	0.00833904	0.350702	-0.56378	-0.3751	6.69206	0.0148142	0.0993833	0.629826	0.702632	-0.157816	-1.31919	0.206082	0.305635
Gpr153|ENSMUSG00000042804	-0.300592	4.35228	5.84441	0.0219485	0.521742	0.418304	4.35271	12.5691	0.00131747	0.0171811	19.1824	20.8758	-0.122045	-1.98012	0.0673635	0.125029
Gpr26|ENSMUSG00000040125	-0.160858	7.32117	5.47989	0.0261144	0.550333	-0.521682	7.32105	65.1832	5.43728e-09	7.78211e-07	202.467	128.072	0.660732	13.5083	7.72352e-09	3.09447e-07
Gpr68|ENSMUSG00000047415	-0.439952	1.33953	6.93271	0.0132766	0.451483	0.425948	1.33955	7.42844	0.0106413	0.0790654	2.6233	2.55	0.040887	0.372891	0.713907	0.788123
Gpr83|ENSMUSG00000031932	-0.117955	6.74954	5.079	0.0317247	0.582505	-0.127095	6.74956	6.93337	0.013278	0.0920778	116.908	99.0119	0.239704	7.60808	1.78431e-06	2.20837e-05
Gprin1|ENSMUSG00000069227	0.128252	4.99649	4.82024	0.0360452	0.608956	0.119942	4.99651	4.68606	0.0385469	0.188885	28.1169	33.3338	-0.245548	-5.95174	1.65794e-05	0.000134245
Greb1l|ENSMUSG00000042942	0.47684	1.72993	5.12882	0.0309602	0.577846	0.644242	1.73025	10.7286	0.00267753	0.0291054	1.83503	4.26598	-1.21708	-7.24473	1.44146e-06	1.85412e-05
Grik2|ENSMUSG00000056073	-0.11502	7.84858	4.87165	0.0351375	0.600632	0.19402	7.84881	16.0111	0.000383825	0.00654637	221.343	235.987	-0.0924268	-2.87548	0.0111479	0.0287426
Gsg1l|ENSMUSG00000046182	-0.158408	7.19872	6.69029	0.0148205	0.470385	-0.489242	7.19866	74.4722	1.32931e-09	2.65475e-07	187.711	119.393	0.65279	31.77	2.02691e-15	1.75854e-11
Gsto1|ENSMUSG00000025068	0.244886	4.23988	13.0451	0.00110218	0.1389	0.442106	4.2399	49.7555	7.95771e-08	6.88397e-06	14.1066	22.4334	-0.669276	-17.6515	7.00228e-12	2.29252e-09
H2-T10|ENSMUSG00000079491	-0.509456	1.80413	10.3325	0.00313288	0.228487	0.674995	1.80448	19.3361	0.000128379	0.00278397	3.45425	3.62858	-0.0710326	-0.564117	0.583676	0.682327
H2-T22|ENSMUSG00000056116	0.478157	4.16269	31.0502	4.71715e-06	0.00898303	0.443258	4.16285	30.7989	5.04304e-06	0.000200567	12.2318	21.8461	-0.836738	-19.5357	8.72288e-13	5.82152e-10
Hebp1|ENSMUSG00000042770	-0.148862	4.83424	5.4345	0.0266912	0.553339	-0.170273	4.83425	8.18699	0.007641	0.0624589	32.3164	26.0099	0.313206	8.72706	1.74275e-07	3.34515e-06
Hivep2|ENSMUSG00000015501	0.0877314	8.11203	4.61596	0.0491594	0.669366	-0.124592	8.11206	10.4242	0.00302215	0.0318243	280.929	273.609	0.0380902	1.32045	0.209123	0.309246
Hmgcl|ENSMUSG00000028672	-0.180676	4.5712	9.78437	0.00623209	0.30456	0.136427	4.57122	6.22632	0.0272077	0.150158	24.9441	24.1965	0.0438977	1.1664	0.262195	0.370007
Hmgn2|ENSMUSG00000003038	-0.175184	5.58175	7.96404	0.00840998	0.350702	0.133408	5.58175	5.33866	0.0279631	0.152832	48.2432	46.8998	0.0407447	1.03882	0.313854	0.426368
Hrk|ENSMUSG00000046607	-0.296696	5.99354	16.8707	0.000286347	0.071126	-0.334676	5.99355	24.9937	2.37241e-05	0.000719897	80.672	52.6178	0.616516	24.0768	2.32285e-13	2.84355e-10
Htr1b|ENSMUSG00000049511	-0.138661	6.64055	6.5524	0.0157852	0.490598	-0.108905	6.6407	4.43363	0.0437716	0.205616	111.963	92.9031	0.26922	4.91456	0.0008114	0.0033027
Htr2a|ENSMUSG00000034997	0.522118	3.71894	18.3517	0.000175689	0.0568138	0.316734	3.71874	7.42802	0.0106433	0.0790654	8.39206	16.3053	-0.958246	-16.6345	8.06221e-12	2.45431e-09
Htr2c|ENSMUSG00000041380	0.248711	6.27747	15.4947	0.000458031	0.0922147	-0.430736	6.27697	49.7433	7.97619e-08	6.88397e-06	78.8157	71.3275	0.144024	3.49012	0.00424864	0.0129055
Htr4|ENSMUSG00000026322	-0.447823	2.42965	15.6214	0.000438345	0.0905156	0.317713	2.4298	8.96979	0.00547963	0.0492995	5.61976	5.13876	0.129089	1.52245	0.148607	0.236789
Hvcn1|ENSMUSG00000064267	-0.272851	3.8844	8.95344	0.00551403	0.292585	0.789644	3.88485	89.4888	1.75031e-10	5.00249e-08	11.6252	16.712	-0.52363	-8.82868	2.45906e-07	4.3944e-06
Ido1|ENSMUSG00000031551	-0.20788	5.08686	8.70308	0.00612719	0.30456	0.316112	5.08708	24.5119	2.71875e-05	0.000798197	32.7319	35.2459	-0.106758	-2.60039	0.0195115	0.0455242
Ido2|ENSMUSG00000031549	0.365584	1.02602	6.24366	0.025945	0.550333	0.302922	1.02616	5.05134	0.0451614	0.209691	1.50811	2.30515	-0.612116	-6.35666	1.2789e-05	0.000108979
Ids|ENSMUSG00000035847	0.125623	9.23152	15.9784	0.00563712	0.296364	-0.107767	9.23141	13.1355	0.0116415	0.084151	586.791	594.858	-0.0196999	-1.03062	0.317498	0.43014
Ift57|ENSMUSG00000032965	-0.106952	5.59344	6.31215	0.0401286	0.62067	0.110546	5.59335	7.98261	0.0226967	0.132817	48.949	49.0786	-0.00381472	-0.132973	0.896726	0.927792
Igfbp6|ENSMUSG00000023046	-0.219289	3.7167	6.42383	0.0167466	0.498773	0.393762	3.71695	23.1597	4.01379e-05	0.00108914	11.9945	13.5817	-0.179293	-4.42661	0.000386859	0.00182165
Il1a|ENSMUSG00000027399	-0.535877	-0.0813156	6.2715	0.0179691	0.504255	0.460929	-0.0812459	5.47649	0.0261645	0.146422	1.05223	1.00704	0.0633307	0.540304	0.595997	0.692705
Il2rb|ENSMUSG00000068227	-0.634835	1.39256	14.5733	0.00063311	0.111017	1.16929	1.39311	57.3701	1.99152e-08	2.26519e-06	2.15982	3.07399	-0.509199	-5.89197	1.78167e-05	0.000142141
Ildr2|ENSMUSG00000040612	0.342919	5.91527	36.0505	1.40823e-06	0.00497163	0.227551	5.9152	17.91	0.000203213	0.00398423	45.0955	68.3362	-0.599666	-11.8751	2.79813e-09	1.51256e-07
Inpp5j|ENSMUSG00000034570	-0.304649	6.13159	31.1527	4.59695e-06	0.00898303	-0.127481	6.1317	6.05697	0.0198658	0.121904	84.8573	63.2201	0.424656	12.1433	8.6432e-10	6.32814e-08
Intu|ENSMUSG00000060798	0.250742	3.81784	18.8832	0.00141031	0.158521	0.274283	3.81785	26.7032	0.000167911	0.0034169	10.9227	15.7899	-0.531676	-18.368	1.31558e-12	7.87169e-10
Ippk|ENSMUSG00000021385	-0.135124	5.09708	6.80873	0.0197943	0.509232	-0.200177	5.0971	17.1092	0.000264784	0.00488471	39.8038	31.2087	0.350958	12.2504	8.7611e-10	6.3875e-08
Itgb7|ENSMUSG00000001281	-0.616883	-0.810214	6.98375	0.0181449	0.505667	1.1187	-0.810056	24.9239	2.41947e-05	0.000731592	0.459442	0.64087	-0.480148	-3.88669	0.00120526	0.00456153
Itpka|ENSMUSG00000027296	-0.176367	6.89656	11.6617	0.00185832	0.181926	-0.201841	6.89662	17.303	0.000248245	0.00465968	137.936	106.735	0.369966	17.5978	2.35742e-10	2.6073e-08
Kcng1|ENSMUSG00000074575	0.30315	5.75776	12.1192	0.00155994	0.161932	0.380068	5.75777	21.6019	6.37282e-05	0.00158398	40.735	66.469	-0.706415	-10.9679	4.03072e-09	1.91619e-07
Kcnj3|ENSMUSG00000026824	0.211476	4.97114	15.3927	0.000495991	0.0962497	0.537417	4.97115	117.924	7.03148e-12	4.16434e-09	22.4315	37.6001	-0.745209	-16.7506	1.67597e-11	3.82651e-09
Kcnt1|ENSMUSG00000058740	-0.12757	7.38598	10.1232	0.00434495	0.270077	-0.260347	7.38596	47.3885	1.25864e-07	9.90359e-06	196.557	151.675	0.373965	13.2069	7.70672e-08	1.75495e-06
Kcnt2|ENSMUSG00000052726	0.205698	4.34393	6.77431	0.0142643	0.461174	0.558364	4.34408	58.723	1.57742e-08	1.85563e-06	14.5623	24.2901	-0.738127	-16.9733	9.55229e-12	2.63097e-09
Kdm4b|ENSMUSG00000024201	-0.136803	6.7153	9.61898	0.00418408	0.26885	-0.23441	6.71539	31.3414	4.39911e-06	0.000180439	123.086	95.3784	0.367936	10.858	9.99163e-07	1.36839e-05
Kif17|ENSMUSG00000028758	-0.134114	5.65531	6.08377	0.0196116	0.509232	-0.106173	5.65541	4.27228	0.0475209	0.216262	55.368	46.8491	0.24103	7.3867	1.06994e-06	1.44821e-05
Kif7|ENSMUSG00000050382	0.289237	1.85223	5.62104	0.0288219	0.563902	0.733888	1.85248	42.8145	3.18537e-07	2.08812e-05	2.19457	4.49823	-1.03542	-13.9778	3.53971e-10	3.39557e-08
Klhl35|ENSMUSG00000035298	0.674145	-0.592678	5.39289	0.0272322	0.559727	-1.1295	-0.592947	18.6853	0.000158022	0.00325034	0.688486	0.49976	0.462194	2.64259	0.0171815	0.0409244
Klhl5|ENSMUSG00000054920	0.0950221	6.07209	9.67148	0.0498417	0.66942	0.105778	6.07214	14.3446	0.0195654	0.120616	61.4748	70.5552	-0.198757	-12.314	6.81769e-10	5.40185e-08
Lama3|ENSMUSG00000024421	0.245323	2.92688	6.37262	0.0171471	0.500628	-0.369716	2.92703	16.2119	0.000358359	0.00619196	7.70103	7.22254	0.092544	1.4911	0.160336	0.251165
Lamc2|ENSMUSG00000026479	0.382936	2.18968	7.22055	0.0116669	0.42008	0.629954	2.18963	22.489	4.88875e-05	0.00127026	2.83949	5.87198	-1.04822	-9.78314	6.50227e-08	1.52264e-06
Lamp5|ENSMUSG00000027270	0.169747	6.5552	11.5847	0.00191439	0.182802	-0.228779	6.55499	24.7856	2.51581e-05	0.000752609	95.785	91.9387	0.0591276	1.46455	0.170912	0.264343
Lca5|ENSMUSG00000032258	0.198637	4.11597	10.7855	0.00698182	0.319097	0.183828	4.11597	10.747	0.00778606	0.0632273	14.4485	18.9134	-0.388487	-11.7053	2.56108e-09	1.42935e-07
Limd2|ENSMUSG00000040699	-0.122538	5.85102	9.13049	0.0142009	0.461174	0.0975223	5.8511	6.5938	0.035985	0.180608	58.8354	57.8909	0.0233477	1.18937	0.25079	0.357019
Lin7b|ENSMUSG00000003872	-0.132758	4.94149	5.00423	0.0329113	0.587569	-0.118971	4.94146	4.63576	0.0395301	0.191781	34.5564	29.1539	0.245264	6.60168	6.79532e-05	0.000427064
Lman2l|ENSMUSG00000001143	0.13109	5.69165	8.34431	0.0106666	0.399839	0.204825	5.69176	23.5041	3.63104e-05	0.00100375	44.1941	56.4167	-0.352268	-14.5864	5.30611e-11	8.76872e-09
Lor|ENSMUSG00000043165	0.393315	0.445935	4.22935	0.0491694	0.669366	0.656078	0.446114	14.4757	0.000656269	0.00996227	0.872648	1.62216	-0.894449	-6.57475	4.93166e-06	4.99601e-05
Lpar2|ENSMUSG00000031861	-0.593729	-0.167759	6.18695	0.0186895	0.508495	0.785827	-0.167678	13.055	0.00109932	0.0150058	0.839591	0.954291	-0.184741	-1.27522	0.227069	0.329992
Lpcat4|ENSMUSG00000027134	-0.189182	6.74253	8.32861	0.00718618	0.323897	-0.190544	6.74255	9.65589	0.00412399	0.040062	126.62	97.8438	0.371948	13.6998	1.22364e-09	8.19443e-08
Lrp1b|ENSMUSG00000049252	0.091394	6.99127	4.5835	0.0423236	0.632562	-0.088912	6.99116	4.8454	0.035606	0.179591	124.616	125.977	-0.0156691	-0.623847	0.545525	0.650402
Lrrc10b|ENSMUSG00000090291	-0.297837	8.24938	12.4491	0.0013769	0.158521	-0.196867	8.2495	6.46214	0.0164595	0.107284	370.635	267.585	0.47	9.16519	2.82376e-06	3.20667e-05
Lrrc55|ENSMUSG00000075224	0.269618	3.92116	12.8567	0.00118205	0.145749	0.506888	3.92124	52.3875	4.8574e-08	4.5095e-06	10.2253	17.8302	-0.802187	-17.1559	2.96603e-09	1.5691e-07
Lrrc9|ENSMUSG00000021090	0.178459	3.87381	8.75642	0.0234873	0.532473	0.687372	3.8741	158.694	1.81594e-13	2.39914e-10	9.96056	18.2779	-0.875805	-27.1994	2.94974e-13	2.84355e-10
Lrriq1|ENSMUSG00000019892	0.484268	0.958225	9.0854	0.00521783	0.287551	0.340373	0.958074	5.56598	0.0250648	0.142258	1.23477	2.27633	-0.882474	-9.19904	2.82061e-07	4.90094e-06
Lrrk2|ENSMUSG00000036273	-0.15386	7.88473	10.3325	0.00313285	0.228487	0.171163	7.88494	14.3658	0.000682531	0.010238	235.825	243.534	-0.046405	-1.55676	0.140265	0.225903
Lrtm2|ENSMUSG00000055003	-0.152238	6.88722	4.58308	0.0405812	0.623461	-0.192455	6.88711	8.68127	0.00618751	0.0536076	139.947	110.066	0.346504	9.70019	1.8064e-07	3.43469e-06
Lss|ENSMUSG00000033105	0.162752	4.22196	6.88731	0.0215625	0.521742	-0.132217	4.22203	5.13674	0.0474769	0.216176	17.6869	18.2126	-0.0422544	-1.31335	0.214557	0.315588
Lurap1|ENSMUSG00000028701	0.133968	4.99046	8.90126	0.0254376	0.548041	0.130822	4.9905	10.0862	0.0195562	0.120602	28.0506	33.6751	-0.263649	-12.6885	4.28939e-10	3.87654e-08
Ly6e|ENSMUSG00000022587	0.120188	5.75885	5.75813	0.0228641	0.529746	0.233457	5.75896	25.2127	2.23083e-05	0.000684186	46.5509	59.2502	-0.348011	-14.1507	8.03772e-09	3.18426e-07
Ly6h|ENSMUSG00000022577	0.166964	6.18319	7.41358	0.0107068	0.399839	0.399813	6.18336	49.0317	9.14162e-08	7.73435e-06	56.8133	81.8468	-0.526696	-12.9944	1.37045e-09	8.84015e-08
Lynx1|ENSMUSG00000022594	-0.17082	8.66005	5.94776	0.0209041	0.517309	0.170986	8.66034	6.95102	0.0131726	0.0917474	406.778	409.892	-0.0110026	-0.306601	0.764346	0.829037
Lzts3|ENSMUSG00000037703	-0.115911	8.80366	10.943	0.0103059	0.394329	-0.239213	8.80365	50.152	7.37952e-08	6.43367e-06	517.835	402.914	0.362018	21.4647	9.91335e-14	1.56379e-10
Macrod1|ENSMUSG00000036278	0.360077	2.07675	11.0863	0.00306809	0.228487	0.256854	2.07664	6.59693	0.0221891	0.131025	3.22815	4.94533	-0.61536	-7.88791	4.59121e-07	7.32904e-06
Macrod2|ENSMUSG00000068205	-0.137054	6.37037	12.4081	0.00355105	0.24399	-0.159134	6.37027	19.6819	0.000268836	0.00494353	93.1018	75.785	0.296897	12.3833	1.80919e-07	3.43469e-06
Mafa|ENSMUSG00000047591	-0.944265	-0.873294	5.39062	0.0272621	0.559727	-2.29936	-0.873636	33.6374	2.50167e-06	0.000114577	1.27235	0.102916	3.62796	22.15	2.36629e-13	2.84355e-10
Magi1|ENSMUSG00000045095	0.104226	5.95124	6.48213	0.0344306	0.597761	0.151271	5.95121	15.8611	0.00102139	0.0141783	54.9957	65.9351	-0.261728	-13.0055	4.27487e-10	3.87654e-08
Map3k11|ENSMUSG00000004054	-0.141605	4.85358	9.18898	0.0217519	0.521742	-0.113756	4.85371	6.60076	0.04916	0.221201	32.3315	27.1972	0.249485	8.43264	3.53297e-07	5.88897e-06
Mas1|ENSMUSG00000068037	-0.460777	2.37755	5.93111	0.0210686	0.51956	-1.06259	2.37717	35.5027	1.60632e-06	7.77142e-05	8.313	3.02598	1.45797	11.8405	1.23261e-07	2.50447e-06
Mast2|ENSMUSG00000003810	0.111353	6.50775	7.4904	0.0167055	0.498773	0.213762	6.50801	31.4903	4.23814e-06	0.000175822	77.9205	97.7134	-0.326554	-13.2536	3.12621e-09	1.62413e-07
Mbtps1|ENSMUSG00000031835	-0.110397	7.14759	9.42797	0.0138967	0.457799	-0.264571	7.14747	66.7414	4.25225e-09	6.35065e-07	165.311	127.392	0.375911	15.4596	3.60616e-09	1.78783e-07
Me3|ENSMUSG00000030621	-0.119576	6.06296	7.57983	0.0133595	0.452507	-0.406438	6.0627	102.198	3.81618e-11	1.39453e-08	82.9769	57.6952	0.524257	16.7982	2.79487e-09	1.51256e-07
Mef2c|ENSMUSG00000005583	0.162829	6.39048	11.3655	0.002084	0.192308	-0.12939	6.39022	8.43269	0.00687701	0.0578984	78.6783	81.8248	-0.0565738	-2.52723	0.0217192	0.0495884
Mettl9|ENSMUSG00000030876	-0.104824	6.67903	8.36822	0.0222665	0.524931	0.107555	6.67908	10.3097	0.0122866	0.0873074	103.222	103.606	-0.00535525	-0.22224	0.826941	0.87644
MIAT_exon5_3|ENSMUSG00000098395	0.461489	1.92385	10.1743	0.00333852	0.235469	0.851873	1.92429	42.3267	3.52946e-07	2.27035e-05	1.95618	4.85883	-1.31257	-12.1727	7.73975e-09	3.09447e-07
Miat|ENSMUSG00000097767	0.417451	6.60376	18.8731	0.000148516	0.0522546	0.85173	6.60427	87.9444	2.12974e-10	5.86837e-08	52.927	127.754	-1.27129	-19.5067	3.53306e-09	1.76239e-07
Minos1|ENSMUSG00000050608	-0.110451	6.13218	10.2388	0.0215416	0.521742	0.112754	6.13222	12.5267	0.0120279	0.086039	70.9062	70.9673	-0.00124444	-0.0631677	0.950418	0.965045
Mkrn1|ENSMUSG00000029922	-0.125762	7.22414	8.5483	0.00654289	0.30857	-0.0939038	7.2241	5.38598	0.0273308	0.150591	165.879	141.904	0.225212	11.6443	1.81103e-09	1.09877e-07
Morn4|ENSMUSG00000049670	0.132913	5.85627	10.2521	0.00803851	0.341417	0.107612	5.8563	7.73811	0.0214133	0.12786	52.2397	61.6105	-0.23803	-9.03766	3.44408e-07	5.77966e-06
Mospd1|ENSMUSG00000023074	-0.177517	3.59962	8.2296	0.0303455	0.575172	0.269618	3.59958	22.6281	0.000410034	0.00693143	11.9156	12.7211	-0.0943715	-2.67789	0.0169169	0.0404272
Mphosph9|ENSMUSG00000038126	0.115243	5.16184	6.90194	0.0448952	0.64336	-0.14064	5.16177	12.0953	0.00868564	0.0683666	35.6976	35.0822	0.0250887	1.02777	0.319703	0.432485
Msc|ENSMUSG00000025930	1.04579	-1.65793	8.49036	0.00670627	0.313185	0.724077	-1.65802	6.50475	0.0161402	0.105804	0.121033	0.386074	-1.67348	-9.75195	2.63844e-08	7.85288e-07
Myh11|ENSMUSG00000018830	0.238575	2.66624	4.34452	0.045791	0.650099	-0.290242	2.66637	7.4646	0.0104724	0.0782815	6.26702	5.95751	0.0730699	0.984081	0.339295	0.453195
Myh7b|ENSMUSG00000074652	-0.369795	2.14397	7.43341	0.0106132	0.399779	-1.02567	2.14372	63.7667	6.82343e-09	9.37539e-07	7.18308	2.78902	1.36485	14.2686	1.17428e-08	4.20993e-07
Myo1c|ENSMUSG00000017774	0.200316	3.69673	7.57629	0.0127084	0.440018	0.300277	3.69687	19.6479	0.000116342	0.0025763	10.3042	14.6553	-0.50819	-12.0136	3.97425e-08	1.06422e-06
Myo5c|ENSMUSG00000033590	-0.642923	3.21543	34.5473	2.00445e-06	0.00572572	1.20912	3.21619	133.217	1.60265e-12	1.37627e-09	7.11484	10.4575	-0.555629	-8.81776	3.06031e-07	5.27334e-06
N4bp2|ENSMUSG00000037795	0.253318	3.49784	5.89706	0.0214094	0.521742	0.200217	3.49774	4.2088	0.0490927	0.221075	8.80166	12.5986	-0.517413	-9.81982	4.87914e-08	1.22522e-06
Nagk|ENSMUSG00000034744	0.25959	4.52803	12.5798	0.00131091	0.156025	0.145623	4.5279	4.45694	0.0432578	0.203828	19.2123	25.6255	-0.41555	-9.48481	1.07921e-07	2.27262e-06
Nckap1|ENSMUSG00000027002	-0.119337	9.53526	7.4795	0.0103989	0.396341	-0.0994505	9.53521	6.03719	0.0201309	0.122867	815.975	699.421	0.222363	10.0502	1.51155e-07	2.97038e-06
Ncor2|ENSMUSG00000029478	0.144164	6.72315	8.08451	0.0079823	0.34121	-0.11635	6.72316	6.19423	0.0186326	0.116454	102.625	103.844	-0.0170386	-0.562948	0.581077	0.680216
Nedd9|ENSMUSG00000021365	-0.210842	3.77822	6.05189	0.0199066	0.509232	0.23169	3.7782	8.68138	0.00618722	0.0536076	13.7915	14.0179	-0.0234875	-0.366018	0.719491	0.792472
Nek10|ENSMUSG00000042567	0.580742	0.934233	5.34376	0.0278867	0.56264	0.691357	0.934344	9.44975	0.00448859	0.0426392	0.950177	2.34355	-1.30243	-8.99026	9.89447e-07	1.35615e-05
Nell2|ENSMUSG00000022454	0.180068	7.84283	13.9831	0.000782177	0.124459	-0.12802	7.84268	7.74319	0.00926442	0.0716095	220.437	230.027	-0.0614393	-1.65361	0.117578	0.195703
Net1|ENSMUSG00000021215	0.282143	3.86905	5.98184	0.0205717	0.514272	0.322279	3.86908	8.9381	0.00555293	0.0496727	10.6925	16.5252	-0.628071	-9.12839	5.79234e-08	1.40375e-06
Neurl1b|ENSMUSG00000034413	0.291351	5.2826	20.0743	0.000101602	0.0441088	0.252896	5.28273	16.3095	0.000346643	0.00603812	30.1813	43.4665	-0.526253	-11.6834	7.26019e-09	2.96361e-07
Nexn|ENSMUSG00000039103	-0.141175	6.3063	6.40537	0.0168897	0.499091	-0.435217	6.30609	76.2532	1.02964e-09	2.10525e-07	100.728	66.8155	0.592207	20.3638	5.86631e-09	2.51961e-07
Nkx2-2|ENSMUSG00000027434	-0.238917	2.26464	5.11424	0.0376742	0.614628	0.231748	2.26461	5.34775	0.031816	0.166612	4.94105	4.89205	0.0143777	0.25382	0.803772	0.858544
Nova1|ENSMUSG00000021047	0.0973808	6.24158	6.30442	0.0394287	0.618556	-0.0881758	6.2415	5.78433	0.0471089	0.214969	74.2921	74.9812	-0.0133198	-0.803336	0.433939	0.54759
Npl|ENSMUSG00000042684	-0.215833	3.1008	4.57749	0.0406956	0.623461	0.199336	3.10102	4.41594	0.0441663	0.206917	8.55866	8.54552	0.00221547	0.0305887	0.975965	0.983063
Npr2|ENSMUSG00000028469	0.16015	5.08224	7.7924	0.00906284	0.368076	0.16177	5.0823	9.18383	0.0050112	0.0460499	29.5423	36.8372	-0.318382	-8.30471	1.33029e-06	1.73298e-05
Npy1r|ENSMUSG00000036437	0.239681	3.932	6.70971	0.0146899	0.467974	0.439804	3.93192	26.9376	1.38642e-05	0.000462366	11.2578	18.2368	-0.695931	-13.1163	4.83133e-10	4.12226e-08
Nubp2|ENSMUSG00000039183	-0.191555	4.35809	9.15144	0.00581539	0.300211	0.142566	4.35806	5.82973	0.0280939	0.153313	21.0413	20.3803	0.0460457	1.03052	0.319777	0.43252
Odf4|ENSMUSG00000032921	-0.437782	0.363833	4.73104	0.0376819	0.614628	-0.672757	0.363953	11.7909	0.0017699	0.0214755	1.89297	0.891703	1.08601	10.1419	1.26004e-08	4.44394e-07
Olfm2|ENSMUSG00000032172	0.156236	4.48746	6.66323	0.0224059	0.525181	0.526295	4.48763	86.47	2.57475e-10	6.80329e-08	16.6448	26.3015	-0.660069	-17.3103	3.07614e-10	3.08539e-08
Onecut2|ENSMUSG00000045991	-0.179229	6.85805	4.74098	0.0374954	0.614628	0.747119	6.85843	93.7492	1.03213e-10	3.28274e-08	91.2761	132.471	-0.537366	-9.65213	2.66428e-08	7.9162e-07
Osbpl1a|ENSMUSG00000044252	0.44005	7.00634	17.8268	0.000208493	0.0597235	-0.570704	7.00622	33.7968	2.4075e-06	0.000111153	126.753	116.645	0.119901	1.61773	0.131039	0.213802
Osbpl5|ENSMUSG00000037606	0.166344	3.96573	7.26271	0.0281917	0.56264	0.224764	3.9657	15.4352	0.00139538	0.0179787	13.0577	16.9713	-0.378193	-11.9057	4.48793e-09	2.0934e-07
Osbpl8|ENSMUSG00000020189	-0.163791	8.728	5.76239	0.022818	0.529746	-0.192011	8.72793	9.0439	0.0053123	0.048071	498.056	387.864	0.360757	7.98838	1.18677e-06	1.58284e-05
P2ry1|ENSMUSG00000027765	0.347698	3.40003	5.89794	0.0214006	0.521742	-0.356211	3.39962	7.14414	0.0120775	0.0862855	9.61619	9.80806	-0.0285022	-0.280565	0.784199	0.844156
Parm1|ENSMUSG00000034981	0.1227	5.84279	7.12476	0.0140733	0.458561	0.395018	5.84304	83.8821	3.61392e-10	8.99552e-08	44.2497	64.4682	-0.542921	-15.2122	9.88305e-10	6.97117e-08
Pcdh20|ENSMUSG00000050505	0.355088	3.83437	8.35169	0.0071155	0.322626	0.319225	3.83421	7.81097	0.00899399	0.0700943	10.3439	17.1975	-0.733414	-8.93768	8.74753e-08	1.92623e-06
Pcdhb14|ENSMUSG00000044043	0.159559	3.95766	4.95336	0.0346357	0.598409	-0.201764	3.95754	9.25046	0.00487436	0.0450334	14.8254	14.5536	0.0266928	0.683019	0.503821	0.613581
Pcdhb16|ENSMUSG00000047910	0.214349	4.29489	7.4555	0.0105099	0.398516	0.317438	4.29482	18.5867	0.000163117	0.00332723	14.7589	21.9754	-0.574303	-13.698	1.34065e-09	8.68024e-08
Pcdhb17|ENSMUSG00000046387	0.156094	4.75394	6.74436	0.0144599	0.464098	0.215178	4.75397	14.7765	0.000589828	0.00923455	22.3053	28.9483	-0.376092	-12.3235	7.02904e-10	5.49405e-08
Pcdhb19|ENSMUSG00000043313	0.175935	4.62891	4.88936	0.0348308	0.599344	0.325362	4.62882	18.9978	0.000142965	0.00302764	19.5095	28.1236	-0.527606	-11.0268	1.83707e-07	3.4762e-06
Pcdhb6|ENSMUSG00000051678	-0.349641	3.30755	6.43295	0.0166763	0.498773	0.651733	3.30736	26.5756	1.53e-05	0.00049863	9.52948	11.7181	-0.29827	-3.04512	0.00829126	0.0225174
Pcdhb7|ENSMUSG00000045062	-0.333867	4.02751	9.09918	0.0051879	0.287551	0.676648	4.02749	43.9053	2.53898e-07	1.75129e-05	15.0871	19.3655	-0.360171	-4.05109	0.00119419	0.00453001
Pcyt1b|ENSMUSG00000035246	0.181573	5.66719	19.5581	0.000427778	0.0894107	0.196769	5.66722	27.3379	4.41595e-05	0.00116325	42.7231	55.6483	-0.381319	-16.6582	2.63442e-09	1.46515e-07
Pde4d|ENSMUSG00000074661	0.149179	4.38244	7.00755	0.0299964	0.575066	0.153501	4.38238	8.26966	0.0174722	0.11144	18.0758	22.6245	-0.323825	-11.2131	7.38131e-08	1.70094e-06
Pdp1|ENSMUSG00000049225	-0.285575	7.8174	24.9545	2.39262e-05	0.0189514	-0.218251	7.81749	16.7403	0.000299623	0.00541118	284.37	200.678	0.502885	12.1646	8.20107e-10	6.08141e-08
Pea15a|ENSMUSG00000013698	0.0938928	8.84902	7.3092	0.0380919	0.614628	0.108861	8.84907	11.6888	0.0109981	0.080838	418.18	481.096	-0.202203	-11.2407	7.69773e-08	1.75495e-06
Pgam2|ENSMUSG00000020475	0.250184	3.01082	4.27103	0.0475423	0.659245	0.884696	3.01137	64.5283	6.03662e-09	8.3612e-07	4.48985	9.7396	-1.1172	-14.634	8.92665e-09	3.44212e-07
Picalm|ENSMUSG00000039361	-0.0991854	7.93733	7.52329	0.0273675	0.559727	0.132277	7.93731	15.4198	0.00175868	0.021407	241.702	247.508	-0.034244	-1.34169	0.205308	0.304905
Pik3ip1|ENSMUSG00000034614	0.144263	4.25904	7.39677	0.0406218	0.623461	-0.138407	4.25889	7.89072	0.0361862	0.181247	18.6515	18.7408	-0.00689265	-0.231166	0.819948	0.87121
Pla2g3|ENSMUSG00000034579	-0.385204	1.52258	14.0075	0.00692608	0.318523	0.307461	1.5228	10.0129	0.022347	0.131492	2.98735	2.85217	0.0668039	1.17502	0.257429	0.364676
Pla2g7|ENSMUSG00000023913	-0.140076	7.22655	9.59002	0.00423409	0.26977	0.130148	7.22658	9.73707	0.0039893	0.0390851	153.783	152.771	0.00952757	0.330346	0.745229	0.81395
Plcb1|ENSMUSG00000051177	-0.143775	8.02899	4.93183	0.034107	0.597761	-0.25967	8.02886	19.3669	0.000127134	0.00276747	310.289	233.092	0.412714	11.9647	9.37398e-09	3.56704e-07
Plce1|ENSMUSG00000024998	-0.14505	4.75167	5.23119	0.0294523	0.569592	0.508459	4.75196	72.6342	1.7384e-09	3.28099e-07	21.9689	29.2482	-0.412886	-10.4939	8.29915e-08	1.84861e-06
Plcxd1|ENSMUSG00000064247	-0.238022	5.07198	14.7485	0.000594962	0.109646	-0.18229	5.07209	9.38547	0.00460929	0.0435688	39.4792	29.6527	0.412927	10.0136	3.40293e-07	5.7235e-06
Plekhg4|ENSMUSG00000014782	-0.292818	2.75469	4.50253	0.0422629	0.632562	0.386729	2.75513	8.77532	0.00594647	0.0521998	6.41765	7.19687	-0.165326	-2.05237	0.0587762	0.111891
Plekhh2|ENSMUSG00000040852	0.212462	3.94246	6.44808	0.0165605	0.498773	0.244917	3.94268	9.69148	0.00406435	0.039662	12.3983	17.1082	-0.46455	-8.15917	1.66912e-06	2.09419e-05
Plekhm3|ENSMUSG00000051344	0.141311	6.1076	12.1347	0.00311743	0.228487	-0.176602	6.1075	22.1387	8.49745e-05	0.00199923	68.3165	66.6503	0.0356226	1.361	0.201309	0.30038
Plxdc1|ENSMUSG00000017417	-0.255438	4.75704	13.7134	0.00086246	0.128537	0.313984	4.7574	23.1697	4.00209e-05	0.00108914	26.7404	27.7875	-0.0554162	-1.07195	0.308679	0.420851
Plxna3|ENSMUSG00000031398	0.227932	3.70701	5.71062	0.0233862	0.532473	0.24123	3.70715	7.58814	0.00991685	0.0751641	10.4773	14.3602	-0.454806	-10.0406	3.48557e-08	9.73939e-07
Pnma3|ENSMUSG00000046287	0.280203	2.98346	6.09692	0.0194915	0.509232	0.825136	2.98384	62.028	9.06053e-09	1.1527e-06	4.68676	9.88576	-1.07676	-16.1435	9.92527e-12	2.68745e-09
Polr2a|ENSMUSG00000005198	0.234976	6.33635	16.4607	0.000328824	0.0761584	-0.119751	6.3361	4.87266	0.0351283	0.178183	75.1913	82.3393	-0.131015	-3.39289	0.00440852	0.0133014
Ppargc1a|ENSMUSG00000029167	-0.114749	5.80664	6.88468	0.0222343	0.524931	0.0935677	5.80659	5.44563	0.0464986	0.213262	57.1618	56.2377	0.0235135	0.78241	0.445907	0.559221
Ppfia2|ENSMUSG00000053825	0.102269	6.2295	8.31986	0.0308726	0.577846	0.156637	6.22945	21.7722	0.000429842	0.00718844	66.4186	80.4242	-0.276042	-12.6644	4.50831e-10	4.00275e-08
Ppil6|ENSMUSG00000078451	-0.371855	1.15114	6.1973	0.0186324	0.508495	0.482484	1.15119	12.1695	0.00153187	0.0192254	2.2113	2.40701	-0.122351	-1.17719	0.25611	0.363133
Ppp1r16b|ENSMUSG00000037754	-0.133517	8.87401	6.07412	0.0197004	0.509232	-0.157345	8.87416	9.50811	0.00438196	0.0419315	535.638	437.9	0.290655	10.8055	7.4336e-08	1.70619e-06
Ppp1r1a|ENSMUSG00000022490	-0.135979	6.58288	4.32424	0.0462669	0.654264	0.322022	6.58324	27.6163	1.15464e-05	0.000395826	87.8123	100.261	-0.191261	-5.52687	5.05146e-05	0.000332547
Ppp1r1b|ENSMUSG00000061718	-0.275833	10.6063	27.9469	1.05398e-05	0.0138955	0.315327	10.6066	41.2946	4.39534e-07	2.67695e-05	1519.52	1567.7	-0.045033	-1.89726	0.074958	0.136011
Ppp3r1|ENSMUSG00000033953	-0.117057	10.3002	5.4784	0.026133	0.550333	-0.152724	10.3002	11.3661	0.00208527	0.024314	1418.57	1174.04	0.272948	12.3015	1.72396e-07	3.31643e-06
Ppp4r4|ENSMUSG00000021209	-0.232885	6.63482	21.3642	6.83346e-05	0.0344467	-0.104453	6.63492	4.94496	0.0338949	0.173982	113.661	90.0238	0.336362	14.063	9.49432e-11	1.33939e-08
Prkcb|ENSMUSG00000052889	-0.156974	9.54727	6.28431	0.0178626	0.504255	-0.142728	9.54733	6.01757	0.0202361	0.123377	843.563	686.891	0.296414	9.77059	3.96235e-08	1.06374e-06
Prkci|ENSMUSG00000037643	-0.108447	6.69129	5.81658	0.0222394	0.524931	0.121389	6.69136	8.10144	0.00792817	0.063988	103.298	104.309	-0.014045	-0.557416	0.58451	0.682899
Prkg1|ENSMUSG00000052920	0.304979	1.92938	4.63629	0.0395111	0.618556	-0.438186	1.92937	11.1806	0.00224146	0.0255456	3.76515	3.37271	0.158802	1.60784	0.13606	0.220523
Prss41|ENSMUSG00000024114	-1.11201	0.647804	22.2851	5.18222e-05	0.029606	0.466334	0.647614	4.37503	0.0450939	0.209544	2.05916	1.46929	0.486935	3.78278	0.00161888	0.00579432
Prss45|ENSMUSG00000047257	-1.01685	-1.14661	4.73926	0.0375277	0.614628	0.993864	-1.14663	5.26133	0.0290314	0.156895	0.577947	0.516775	0.161402	0.563628	0.580444	0.679684
Prss56|ENSMUSG00000036480	0.673712	1.41572	8.44357	0.00684143	0.316052	-0.429048	1.41561	4.23258	0.0484973	0.219352	2.33809	2.60851	-0.157892	-0.797585	0.442726	0.556236
Psme1|ENSMUSG00000022216	0.151234	4.46677	4.94889	0.033821	0.596971	0.232437	4.46679	13.2136	0.00103677	0.0143369	18.4501	24.1344	-0.387465	-10.9733	1.98149e-08	6.29723e-07
Ptges3|ENSMUSG00000071072	0.108877	5.56716	7.24758	0.0380698	0.614628	0.145152	5.56717	15.3107	0.00300211	0.0316715	42.6239	50.7586	-0.251989	-10.5994	7.02901e-09	2.91092e-07
Ptp4a2|ENSMUSG00000028788	-0.102297	7.51574	6.6238	0.0229617	0.530091	0.0967488	7.51577	6.79962	0.0216275	0.128575	185.477	184.563	0.007125	0.316628	0.756144	0.822919
Ptpn5|ENSMUSG00000030854	-0.169616	9.60717	7.72198	0.00934642	0.375148	-0.246207	9.60717	18.7803	0.000153272	0.00318192	938.907	698.201	0.427339	13.089	9.69885e-09	3.64274e-07
Ptpn7|ENSMUSG00000031506	-0.333597	3.20565	6.30724	0.0176738	0.503636	-1.28108	3.20535	107.07	2.21305e-11	9.50229e-09	15.9805	5.4382	1.55511	21.0879	5.17052e-09	2.2946e-07
Ptprh|ENSMUSG00000035429	0.554401	1.66934	24.5152	7.31583e-05	0.0352509	0.412756	1.66939	16.1808	0.00110833	0.0150718	1.93476	3.8278	-0.984362	-10.6031	1.64859e-08	5.45924e-07
Ptpro|ENSMUSG00000030223	0.179325	5.85148	20.4609	0.000381184	0.0808504	0.472848	5.8515	162.663	1.32878e-13	1.93383e-10	42.3042	67.6467	-0.677218	-27.3759	6.3759e-11	1.03397e-08
Ptprs|ENSMUSG00000013236	0.0977316	7.96467	5.76078	0.0280811	0.56264	0.0830948	7.96481	4.45769	0.0478723	0.21717	227.896	257.874	-0.178295	-6.30433	1.39816e-05	0.000116863
Ptprv|ENSMUSG00000097993	-0.443188	4.72421	26.9081	1.39368e-05	0.015595	-1.05462	4.72409	172.725	6.19202e-14	1.36891e-10	45.0144	16.6566	1.43429	19.7575	7.59556e-10	5.78062e-08
Pxdn|ENSMUSG00000020674	-0.224665	6.8432	17.1647	0.000259532	0.0663898	-0.168391	6.84321	11.4433	0.00202372	0.023709	137.473	104.23	0.399388	11.9469	1.29143e-08	4.52706e-07
Rab3b|ENSMUSG00000003411	0.176813	5.51071	5.19361	0.0299961	0.575066	0.46197	5.5108	40.8253	4.86171e-07	2.91958e-05	34.3333	52.8441	-0.622135	-14.1708	7.60745e-11	1.14786e-08
Rab3ip|ENSMUSG00000064181	-0.136111	5.17361	7.37517	0.0172764	0.500628	0.146275	5.17373	9.55565	0.00614919	0.0534746	36.4566	36.7515	-0.0116235	-0.466658	0.64667	0.734359
Rab6a|ENSMUSG00000030704	0.109881	6.69778	8.2707	0.0158581	0.490598	-0.0878361	6.6977	6.17376	0.0387309	0.189355	100.479	102.384	-0.0270986	-1.43992	0.16875	0.261536
Rad54b|ENSMUSG00000078773	-0.256435	3.29129	7.7647	0.00917324	0.371679	-0.343181	3.29115	16.7358	0.000300079	0.00541372	12.3564	8.26516	0.580141	10.8449	2.24113e-08	6.91959e-07
Rarb|ENSMUSG00000017491	-0.130922	7.35983	5.38428	0.0273457	0.559727	-0.227914	7.35977	18.6473	0.000159962	0.00327454	190.398	147.513	0.368179	10.4822	9.6287e-09	3.63544e-07
Rasgef1a|ENSMUSG00000030134	-0.123355	8.73672	8.96596	0.00626035	0.30456	-0.135826	8.73681	12.0992	0.00157332	0.0196453	474.476	396.665	0.258417	12.8892	3.54194e-10	3.39557e-08
Rasgef1b|ENSMUSG00000029333	-0.219735	6.84955	13.7683	0.000845444	0.128231	-0.167778	6.84939	9.40522	0.00457183	0.0432386	137.756	105.339	0.387073	12.3667	7.74893e-10	5.82075e-08
Rasgrp2|ENSMUSG00000032946	-0.20117	8.07018	15.5458	0.00044998	0.091812	-0.187206	8.07025	15.3781	0.000477608	0.00780487	317.823	243.747	0.382835	14.3237	4.89121e-09	2.20448e-07
Rassf3|ENSMUSG00000025795	-0.129335	5.40713	5.58569	0.0248223	0.544738	0.242545	5.40734	22.2583	5.23516e-05	0.00135006	40.7614	43.7798	-0.103059	-2.58872	0.0220166	0.0501223
Rbbp7|ENSMUSG00000031353	-0.0944344	6.94618	5.67768	0.03717	0.612374	0.096378	6.94619	6.84001	0.0228164	0.133245	124.304	124.574	-0.00313098	-0.115972	0.910146	0.93776
Rbm38|ENSMUSG00000027510	0.38948	1.00535	5.51979	0.0256187	0.550333	0.492547	1.00552	10.4513	0.00298966	0.0315984	1.24578	2.27903	-0.871374	-10.0352	1.57244e-08	5.26735e-07
Rbp4|ENSMUSG00000024990	-0.447501	4.10848	16.2189	0.000356996	0.0785836	0.466663	4.10892	19.733	0.000113272	0.00252001	16.5581	16.9992	-0.0379291	-0.492286	0.629112	0.720171
Rdh12|ENSMUSG00000021123	0.469207	1.62308	11.539	0.00194847	0.182802	0.269068	1.62303	4.37036	0.0452013	0.209743	2.0119	3.49713	-0.797612	-9.22012	6.33693e-08	1.49807e-06
Rerg|ENSMUSG00000030222	-0.165768	5.29552	9.19534	0.00498418	0.283921	0.317619	5.2956	41.3776	4.31794e-07	2.63917e-05	37.4307	41.4096	-0.145744	-4.94209	0.00014515	0.000803393
Rfc5|ENSMUSG00000029363	-0.189717	2.97143	6.63157	0.042139	0.631654	-0.207486	2.97149	8.93818	0.0181776	0.114643	9.03037	6.85259	0.398137	8.4553	7.26091e-07	1.06954e-05
Rgs14|ENSMUSG00000052087	-0.285843	5.9489	10.239	0.00325277	0.230369	-0.661876	5.94878	62.5148	8.36437e-09	1.09663e-06	89.4467	45.1506	0.986283	17.434	5.43019e-10	4.48689e-08
Rgs19|ENSMUSG00000002458	0.223349	3.78169	6.81977	0.0139729	0.457799	0.638647	3.7819	65.8431	4.8973e-09	7.12805e-07	9.38115	16.5908	-0.822552	-15.6871	2.39224e-11	4.82677e-09
Rhoq|ENSMUSG00000024143	-0.102311	6.00808	5.18629	0.0340253	0.597761	-0.0904534	6.00805	4.54344	0.0460852	0.212259	70.5135	61.6941	0.192765	7.80476	1.76825e-06	2.19475e-05
Rin1|ENSMUSG00000024883	-0.141387	6.51306	11.6612	0.00222962	0.194967	-0.223634	6.51304	32.2032	3.55005e-06	0.000153582	106.091	82.7383	0.358668	16.2396	1.14815e-11	2.97355e-09
Riok3|ENSMUSG00000024404	-0.252475	6.33507	14.3252	0.000691669	0.116221	0.189274	6.33504	9.27089	0.00483321	0.0447979	85.3272	82.1508	0.054731	1.13328	0.280727	0.3906
Rmnd5b|ENSMUSG00000001054	-0.139514	5.38556	8.1751	0.0100856	0.390595	-0.263575	5.38552	32.5326	3.27345e-06	0.000143789	49.2053	37.2804	0.400396	17.4722	2.31622e-11	4.81635e-09
Rnf144a|ENSMUSG00000020642	-0.21409	5.72652	5.75736	0.0228725	0.529746	-0.232104	5.72641	8.01335	0.00823614	0.0658484	63.9785	46.6307	0.456307	6.32107	0.000162462	0.000880951
RP23-242C19.7|ENSMUSG00000098650	-0.226468	7.24761	20.0027	0.000103898	0.0441088	0.104719	7.24778	5.03969	0.0323506	0.168419	163.513	150.498	0.119661	4.71854	0.000275936	0.00135869
RP24-113D21.1|ENSMUSG00000098495	-0.456964	0.814585	7.34944	0.011016	0.406117	0.586674	0.814781	13.7477	0.000852755	0.0122973	1.68283	1.8147	-0.108836	-1.24511	0.231286	0.334945
Rph3a|ENSMUSG00000029608	0.140196	8.17534	8.99044	0.00542919	0.290784	0.235234	8.17558	28.1587	9.9925e-06	0.000352405	244.388	318.072	-0.380178	-10.739	2.1499e-08	6.70164e-07
Rpl29|ENSMUSG00000048758	0.699475	5.59657	4.34939	0.0456775	0.650099	-0.697566	5.59657	4.89754	0.0346983	0.176733	43.2864	43.5027	-0.00719151	-0.0636275	0.950235	0.964916
Rps6ka4|ENSMUSG00000024952	-0.223189	5.72002	10.9531	0.00244856	0.202734	-0.31829	5.72004	24.9691	2.38886e-05	0.000723609	65.2595	45.3026	0.526593	19.2485	1.65502e-10	2.02039e-08
Rps6ka5|ENSMUSG00000021180	-0.278139	6.59864	13.4118	0.000962899	0.133384	0.174261	6.59872	6.23451	0.0182868	0.11503	101.517	94.6162	0.101568	1.97161	0.0698461	0.128536
Rspo1|ENSMUSG00000028871	-0.290417	3.04999	5.04986	0.0321814	0.583701	0.681096	3.05059	29.9661	6.23552e-06	0.000236936	6.60883	8.96842	-0.440458	-3.7329	0.00187139	0.00653631
Satb1|ENSMUSG00000023927	0.191538	4.9079	6.52146	0.0160109	0.492658	0.177966	4.90789	6.62594	0.0152682	0.101638	24.677	32.8152	-0.411199	-5.9021	0.00020795	0.00107567
Sbsn|ENSMUSG00000046056	-0.307738	4.44581	19.538	0.000120218	0.0468276	-0.222036	4.44592	11.5508	0.00194129	0.0229665	26.8108	18.7848	0.513244	15.4117	8.37478e-11	1.22117e-08
Scaf1|ENSMUSG00000038406	0.0991907	6.91745	8.24487	0.0282259	0.56264	-0.108217	6.91752	10.6692	0.010666	0.0791998	120.567	119.743	0.00988761	0.468861	0.647929	0.735405
Scn3b|ENSMUSG00000049281	0.177767	6.27727	11.9798	0.00164498	0.166824	-0.151429	6.27712	9.98806	0.00360204	0.0363057	76.0791	77.7209	-0.0308022	-0.915219	0.375682	0.490728
Scn4b|ENSMUSG00000046480	-0.353658	10.9818	12.145	0.00154475	0.16185	-0.251086	10.9819	7.21144	0.0117194	0.0845009	2559.82	1699.74	0.590729	15.9739	4.69105e-09	2.16982e-07
Scn5a|ENSMUSG00000032511	0.291948	2.35398	5.42872	0.0267656	0.554028	0.982621	2.35452	73.4366	1.54532e-09	3.01601e-07	2.75276	6.93752	-1.33354	-11.8375	2.02341e-09	1.1983e-07
Scube2|ENSMUSG00000007279	-0.703355	-0.91229	7.9278	0.0108945	0.403285	0.611171	-0.912137	6.7455	0.0190539	0.118551	0.523243	0.493958	0.0830939	0.675934	0.509253	0.618546
Sec14l1|ENSMUSG00000020823	-0.100174	8.41541	5.22937	0.0294783	0.569592	-0.234182	8.41542	31.8622	3.86298e-06	0.000163819	393.55	310.963	0.339802	19.382	1.10835e-08	4.04035e-07
Sec14l3|ENSMUSG00000054986	-0.526092	1.57504	8.79974	0.00588212	0.302744	-0.574323	1.57532	11.5838	0.00191673	0.0227819	4.26243	2.03169	1.06899	9.82377	1.37695e-07	2.75263e-06
Selm|ENSMUSG00000075702	-0.188121	5.67795	13.96	0.000788729	0.124459	-0.192243	5.67797	16.6952	0.000304207	0.00547668	59.8223	46.6647	0.358352	11.5983	4.95917e-09	2.22932e-07
Sema3a|ENSMUSG00000028883	0.16501	5.55107	5.13283	0.0308996	0.577846	0.195419	5.55095	8.22926	0.00750327	0.0615418	38.9382	50.2587	-0.368185	-7.10224	3.84008e-06	4.06879e-05
Sema6c|ENSMUSG00000038777	0.254705	2.68212	8.10928	0.0131123	0.446782	0.290617	2.68222	12.1574	0.00236329	0.0265868	5.0994	7.34403	-0.526244	-9.29265	8.09683e-08	1.82226e-06
Sema7a|ENSMUSG00000038264	-0.220117	6.9008	6.98358	0.0129753	0.445087	-0.22166	6.90076	8.51435	0.00664176	0.0565554	144.47	107.689	0.4239	8.31533	8.33878e-06	7.70061e-05
Serpinb1b|ENSMUSG00000051029	-0.484124	1.52731	13.4057	0.000965031	0.133384	-1.17069	1.52697	85.9379	2.75891e-10	7.17943e-08	5.356	1.6225	1.72294	14.5928	2.12631e-07	3.93764e-06
Setmar|ENSMUSG00000034639	-0.31817	1.09077	4.92368	0.0449915	0.644201	0.304875	1.09071	5.37134	0.0362542	0.181482	2.14343	2.1861	-0.028441	-0.322067	0.751665	0.819432
Sez6|ENSMUSG00000000632	-0.136061	9.28863	9.10881	0.00516711	0.287551	0.179319	9.28882	17.0093	0.000273771	0.00501282	605.542	626.584	-0.0492803	-1.70863	0.105875	0.17969
Sfmbt2|ENSMUSG00000061186	0.419388	2.69627	9.22619	0.00492066	0.283567	0.945643	2.69653	56.0377	2.51459e-08	2.71623e-06	3.12271	8.78786	-1.49271	-15.9627	1.9254e-10	2.24225e-08
Sh2d5|ENSMUSG00000045349	-0.186754	6.11624	9.36047	0.0046542	0.27891	-0.368846	6.11616	40.1399	5.64033e-07	3.30624e-05	87.9622	58.8709	0.57933	13.9312	9.026e-10	6.49872e-08
Sh3bgrl|ENSMUSG00000031246	0.143123	6.94611	24.7408	0.00154225	0.16185	0.126288	6.94601	23.3086	0.00289642	0.0308598	108.465	131.777	-0.280865	-18.8219	1.27538e-12	7.87169e-10
Sh3rf2|ENSMUSG00000057719	-0.159646	5.48861	6.46488	0.0164328	0.498337	-0.156244	5.48864	7.13681	0.0121172	0.0865335	52.6075	41.8095	0.331437	5.71163	0.000264033	0.00131087
Shank2|ENSMUSG00000037541	0.149863	5.34616	5.06606	0.0319266	0.583182	-0.135208	5.3462	4.72543	0.0377961	0.186269	39.818	40.1212	-0.010943	-0.342317	0.736902	0.806785
Shisa2|ENSMUSG00000044461	-0.451159	3.95664	9.29727	0.00477761	0.282357	0.730747	3.95718	26.2035	1.69426e-05	0.000543905	13.4147	17.347	-0.370874	-2.64881	0.0195941	0.0456575
Sik1|ENSMUSG00000024042	-0.442039	4.16912	9.50721	0.00438073	0.270077	0.519674	4.16934	15.0873	0.000528689	0.00843302	18.3399	18.883	-0.0421055	-0.371056	0.717779	0.791085
Sipa1l3|ENSMUSG00000030583	-0.114307	6.39459	6.27078	0.0179751	0.504255	-0.219351	6.39462	25.914	1.8351e-05	0.000583599	95.6696	76.1612	0.329005	10.697	6.82732e-09	2.85464e-07
Slc16a14|ENSMUSG00000026220	0.415619	2.12842	16.7887	0.000610005	0.111017	0.371463	2.12849	16.6421	0.00065661	0.00996227	3.07692	5.20094	-0.757284	-11.3557	2.72189e-09	1.48057e-07
Slc26a10|ENSMUSG00000040441	-0.203004	2.80847	5.8999	0.0383143	0.615196	-0.367354	2.80852	21.4851	6.6015e-05	0.00163138	8.91893	6.04665	0.560734	10.4964	7.38712e-07	1.08261e-05
Slc29a1|ENSMUSG00000023942	-0.295874	5.27564	20.4994	8.90442e-05	0.0412467	0.281918	5.27577	21.08	7.46566e-05	0.00179835	39.727	39.3046	0.015423	0.401619	0.693	0.772166
Slc37a1|ENSMUSG00000024036	0.275191	3.2815	15.2755	0.00172948	0.173343	0.397283	3.28173	36.9467	1.15023e-06	5.89708e-05	7.02189	11.1826	-0.67133	-14.3557	1.40376e-10	1.83143e-08
Slc5a4b|ENSMUSG00000020226	-0.899171	-1.34649	5.28014	0.0287599	0.563902	1.28504	-1.34614	12.2714	0.00147387	0.018632	0.269077	0.401663	-0.577967	-2.33593	0.0344039	0.072475
Slc6a15|ENSMUSG00000019894	0.143296	6.18764	8.67359	0.00620414	0.30456	0.113018	6.18751	6.12904	0.0192075	0.119168	64.9135	77.5979	-0.257499	-7.22473	1.86219e-06	2.27875e-05
Slitrk1|ENSMUSG00000075478	0.155672	4.83893	6.87695	0.0136155	0.453751	0.320153	4.8389	33.5438	2.55884e-06	0.000116883	22.8402	31.7069	-0.473222	-13.0983	4.98661e-10	4.20037e-08
Slmap|ENSMUSG00000021870	-0.105707	8.16743	5.48622	0.026035	0.550333	-0.202364	8.16737	23.1581	4.01563e-05	0.00108914	326.162	261.893	0.316609	15.8597	3.71587e-09	1.81943e-07
Smad7|ENSMUSG00000025880	-0.225708	4.52417	8.38135	0.00702574	0.319965	0.262282	4.52434	12.7635	0.00122507	0.0162979	22.8347	23.4378	-0.0376082	-0.928741	0.370141	0.484915
Smarcd1|ENSMUSG00000023018	-0.0949987	7.83064	8.30431	0.0342965	0.597761	-0.195222	7.83064	40.3169	3.24077e-06	0.000142719	255.781	209.441	0.288368	16.1739	4.99704e-09	2.24053e-07
Snrk|ENSMUSG00000038145	0.172624	5.29309	11.285	0.00215023	0.194967	-0.135398	5.29311	7.87401	0.00875013	0.0686662	37.8449	38.9193	-0.0403871	-1.3054	0.216197	0.317435
Sobp|ENSMUSG00000038248	0.147943	4.49317	6.61382	0.028579	0.56264	0.162567	4.4932	9.09692	0.0100562	0.0760188	19.5492	23.9594	-0.293479	-7.85375	4.82277e-07	7.64244e-06
Spag6|ENSMUSG00000022783	0.22398	3.32927	10.0163	0.0115118	0.417126	0.54133	3.32946	69.2346	2.89331e-09	4.68798e-07	6.8554	11.6667	-0.767088	-18.4886	9.10371e-11	1.30552e-08
Sprn|ENSMUSG00000045733	0.1317	6.11965	9.05669	0.00629922	0.30456	0.137666	6.11961	11.241	0.00218924	0.0251506	61.1082	73.4249	-0.264904	-10.274	7.63536e-08	1.74327e-06
Srxn1|ENSMUSG00000032802	-0.108827	6.53753	4.21765	0.048861	0.669366	-0.134731	6.53744	7.35496	0.0109938	0.080838	103.65	87.2213	0.248964	8.27294	2.35864e-07	4.27444e-06
Sstr5|ENSMUSG00000050824	-1.82021	2.42501	18.8547	0.000149395	0.0522546	1.11924	2.42478	7.20812	0.0117368	0.0845505	7.04576	4.92812	0.515717	1.86866	0.0918912	0.159965
St6galnac6|ENSMUSG00000026811	0.0946608	6.83596	5.67172	0.0374768	0.614628	-0.115743	6.83592	9.88731	0.00647754	0.0554066	115.536	114.349	0.0148935	0.548656	0.59261	0.690225
St8sia3|ENSMUSG00000056812	-0.193337	9.19816	14.4861	0.000653063	0.111895	0.1021	9.19827	4.67722	0.0387178	0.189355	608.424	573.326	0.0857219	2.7533	0.0138037	0.0342518
Strn|ENSMUSG00000024077	-0.205979	9.21151	13.2936	0.00100559	0.134647	0.173172	9.21157	10.8479	0.0025542	0.0280131	604.287	588.533	0.0381105	1.04138	0.314864	0.427439
Syndig1l|ENSMUSG00000071234	-0.148332	8.67942	5.09712	0.0314442	0.57997	0.164072	8.67971	6.91987	0.0133592	0.0924803	405.875	412.5	-0.0233606	-0.627301	0.540032	0.64568
Synpo2|ENSMUSG00000050315	-0.129996	5.28583	4.28599	0.0471799	0.659019	0.270575	5.28599	21.5771	6.42052e-05	0.00159353	37.531	41.3535	-0.139923	-4.11576	0.00114986	0.00438801
Syp|ENSMUSG00000031144	0.196002	9.26458	34.5877	1.62539e-05	0.015595	0.340688	9.26467	117.572	7.28801e-12	4.17238e-09	481.468	691.442	-0.522169	-31.0683	3.56466e-12	1.37453e-09
Syt2|ENSMUSG00000026452	-0.296437	6.25981	12.105	0.00156839	0.161932	-0.46801	6.25977	34.6483	1.96443e-06	9.37197e-05	102.703	61.7363	0.734284	20.2035	2.55779e-13	2.84355e-10
Syt5|ENSMUSG00000004961	0.137868	7.07772	20.8142	0.00225769	0.196419	0.145334	7.07775	25.8941	0.000593922	0.00928172	118.192	142.79	-0.272758	-15.2147	1.44555e-10	1.87188e-08
Syt6|ENSMUSG00000027849	-0.158523	7.70371	9.74899	0.00396723	0.262527	-0.235878	7.70363	24.6575	2.60873e-05	0.000771169	249.26	187.626	0.409795	11.9543	9.6153e-07	1.32944e-05
Sytl2|ENSMUSG00000030616	0.239206	5.63112	9.4136	0.00455311	0.275125	0.445849	5.63124	36.2592	1.34719e-06	6.70666e-05	35.9077	57.8591	-0.688251	-15.6277	4.09563e-08	1.08666e-06
Tbc1d20|ENSMUSG00000027465	-0.109213	6.59959	4.68699	0.0385204	0.615196	-0.1812	6.59954	14.6738	0.000611677	0.00949011	110.47	90.3027	0.290812	12.1249	8.98105e-09	3.45542e-07
Tbc1d4|ENSMUSG00000033083	-0.290587	5.25712	13.7714	0.000844494	0.128231	0.349486	5.25744	23.1971	3.9702e-05	0.00108235	37.7967	39.8857	-0.0776127	-1.58148	0.132358	0.215509
Tbc1d8|ENSMUSG00000003134	-0.130922	7.03009	4.20227	0.0492485	0.669366	-0.162739	7.0301	7.72611	0.00933395	0.0719744	146.881	119.56	0.29692	6.85971	2.73603e-05	0.000201167
Tcerg1|ENSMUSG00000024498	0.151007	5.77132	10.3466	0.00311522	0.228487	-0.121903	5.77111	7.8321	0.00995615	0.0753623	52.9348	54.4122	-0.0397123	-1.55096	0.146337	0.233881
Tcf7|ENSMUSG00000000782	-0.268356	3.934	11.2065	0.00221707	0.194967	-0.304719	3.93411	16.2036	0.000359381	0.00620339	19.8396	13.3438	0.572216	19.6134	7.4007e-13	5.35071e-10
Tdrkh|ENSMUSG00000041912	-0.124398	5.4436	5.86015	0.0217858	0.521742	0.133451	5.44369	7.90289	0.00864079	0.0681483	43.8123	44.1972	-0.0126193	-0.340092	0.74143	0.810616
Tesc|ENSMUSG00000029359	-0.225259	6.36528	14.1137	0.000746199	0.121643	-0.284236	6.3653	25.5721	2.01775e-05	0.000627018	101.005	71.7073	0.49424	17.3463	5.30609e-11	8.76872e-09
Thbs1|ENSMUSG00000040152	0.657443	0.42522	7.86363	0.00878545	0.358509	1.13377	0.425152	30.67	5.21035e-06	0.000206193	0.468653	2.0352	-2.11858	-13.6739	1.34574e-10	1.78254e-08
Them6|ENSMUSG00000056665	-0.170056	5.56639	8.21358	0.00755009	0.332651	-0.265638	5.56629	24.3255	2.86694e-05	0.000831752	56.9376	42.9337	0.407274	12.1772	2.4102e-08	7.26072e-07
Tiam2|ENSMUSG00000023800	-0.125256	7.04276	5.30721	0.0283847	0.56264	-0.23331	7.04258	22.2412	5.2619e-05	0.00135492	154.596	120.025	0.365171	10.5905	1.0898e-08	3.98948e-07
Timm44|ENSMUSG00000002949	-0.100954	5.64341	6.76139	0.0493999	0.66942	-0.112339	5.64341	9.27171	0.0200829	0.122728	54.8129	47.3421	0.211391	8.90735	1.09727e-07	2.29964e-06
Tlk1|ENSMUSG00000041997	-0.111451	7.22328	12.4276	0.01292	0.444651	-0.12009	7.22322	16.4944	0.004207	0.0406157	164.833	140.101	0.234533	15.5101	3.42001e-11	6.27305e-09
Tll1|ENSMUSG00000053626	0.377272	1.74223	7.29008	0.0113107	0.411579	0.309455	1.74224	6.06344	0.0198057	0.121617	2.44447	3.89787	-0.673167	-8.25564	3.73341e-07	6.16385e-06
Tmeff1|ENSMUSG00000028347	-0.14869	6.46425	13.3859	0.00142148	0.158521	0.100069	6.46416	6.98838	0.0225765	0.132248	90.1423	87.2614	0.0468617	1.85338	0.0848285	0.150122
Tmem130|ENSMUSG00000043388	0.0990264	7.20445	4.42762	0.0438964	0.638081	0.123871	7.2045	7.77731	0.00912721	0.0708766	132.669	155.758	-0.231474	-6.45793	1.38378e-05	0.000115997
Tmem196|ENSMUSG00000048004	0.259867	1.83509	5.50887	0.0436814	0.638081	-0.322097	1.83484	9.94237	0.00698106	0.0585162	3.42847	3.36908	0.0252071	0.382313	0.707123	0.783282
Tmprss6|ENSMUSG00000016942	-0.671261	1.85121	8.62055	0.00634516	0.30456	0.755571	1.85187	12.5809	0.00131167	0.017135	3.20645	3.63921	-0.182647	-1.1212	0.280928	0.390723
Tmsb15b2|ENSMUSG00000089996	0.279951	2.09489	7.4704	0.0215502	0.521742	0.328785	2.09494	12.0972	0.00333603	0.034371	3.21484	4.85505	-0.594738	-8.9355	2.24222e-06	2.6594e-05
Tnfaip8l3|ENSMUSG00000074345	0.232295	2.70334	6.68357	0.0223449	0.525181	-0.188876	2.70342	5.22542	0.0429346	0.202862	6.18451	6.34417	-0.0367718	-0.558231	0.584141	0.682634
Tnnt2|ENSMUSG00000026414	0.370153	1.86896	5.94203	0.0209606	0.517642	0.579403	1.86882	16.7413	0.000299524	0.00541118	2.26335	4.64091	-1.03595	-13.1553	5.51453e-09	2.41028e-07
Tomm70a|ENSMUSG00000022752	-0.141732	9.46645	4.52155	0.041859	0.631654	0.284401	9.46661	20.7239	8.32572e-05	0.00197233	662.439	735.564	-0.151064	-4.29746	0.000519137	0.00231225
Tox2|ENSMUSG00000074607	0.284995	2.34231	7.81701	0.00950165	0.380488	-0.230809	2.34237	6.18443	0.0242221	0.138772	4.88226	5.00582	-0.036057	-0.939108	0.360995	0.475914
Tpm2|ENSMUSG00000028464	-0.450203	4.07559	14.5612	0.000635822	0.111017	0.318413	4.07593	8.42871	0.00688871	0.0579563	18.2326	16.7157	0.125312	1.616	0.136613	0.22115
Tpst1|ENSMUSG00000034118	-0.151259	5.68246	12.5096	0.0030735	0.228487	-0.275756	5.68239	47.9302	1.13184e-07	9.14835e-06	61.0871	45.3459	0.429896	26.6202	1.68134e-14	4.60027e-11
Trank1|ENSMUSG00000062296	-0.102466	9.52518	8.41757	0.0254531	0.548041	-0.145447	9.52529	19.5309	0.00076922	0.0113402	815.875	689.552	0.24269	11.8965	1.24637e-09	8.22323e-08
Trhr|ENSMUSG00000038760	0.860111	-1.57873	4.1806	0.0498003	0.66942	-0.791953	-1.57869	4.48986	0.0425432	0.201845	0.262488	0.226908	0.210143	0.542937	0.59462	0.691641
Trib3|ENSMUSG00000032715	-0.378036	1.12395	4.76793	0.0369953	0.612374	-0.365165	1.12379	4.92577	0.0342174	0.175115	2.98652	1.86705	0.677705	5.45481	0.000118097	0.000677206
Triqk|ENSMUSG00000055963	0.15388	3.99891	7.51077	0.0387242	0.615196	0.139247	3.99883	6.91076	0.04381	0.20564	13.8906	17.1789	-0.306526	-10.5193	4.22788e-08	1.10026e-06
Trmt10a|ENSMUSG00000004127	-0.196622	3.16186	7.78524	0.0283393	0.56264	0.204693	3.1619	9.50678	0.0143175	0.0970798	9.14787	9.21286	-0.0102123	-0.295496	0.771218	0.8343
Trp53i11|ENSMUSG00000068735	0.292394	3.42165	5.86047	0.0217825	0.521742	0.359923	3.42169	10.3332	0.00313428	0.0327057	7.8857	12.0123	-0.607199	-9.21547	5.19512e-08	1.2878e-06
Trpc7|ENSMUSG00000021541	0.259699	2.92448	4.60315	0.0401739	0.62067	0.243196	2.92435	4.78812	0.0366336	0.18255	5.88733	8.51322	-0.53209	-9.19017	3.54541e-07	5.90402e-06
Tsc2|ENSMUSG00000002496	0.116962	6.76545	11.862	0.0103074	0.394329	-0.101244	6.76554	10.0609	0.0172133	0.110478	107.555	108.899	-0.0179208	-0.887419	0.388652	0.503614
Tspan33|ENSMUSG00000001763	0.179033	3.32814	6.10733	0.0433723	0.635194	0.541629	3.32836	65.7371	4.98001e-09	7.18754e-07	7.38598	11.6818	-0.661402	-13.2543	5.09393e-10	4.24951e-08
Tspyl3|ENSMUSG00000074671	0.124864	5.27619	11.4806	0.025425	0.548041	0.112132	5.27611	10.5987	0.0303014	0.161523	34.3305	40.5363	-0.239724	-9.73415	4.19145e-08	1.0971e-06
Tst|ENSMUSG00000044986	-0.195794	4.4523	9.63538	0.00418893	0.26885	0.169877	4.45236	8.23229	0.00807805	0.0648623	22.215	21.7711	0.0291215	0.851931	0.406717	0.520838
Ttc9|ENSMUSG00000042734	-0.167181	5.29059	10.5527	0.002869	0.221494	-0.141938	5.29052	9.00217	0.00564804	0.0502878	45.0072	36.295	0.310387	8.85501	1.03827e-05	9.20598e-05
Tuba4a|ENSMUSG00000026202	-0.156896	8.55701	13.5564	0.00091325	0.131531	-0.131735	8.55695	10.9723	0.00243205	0.0270752	424.991	347.878	0.288851	13.743	3.0093e-10	3.04724e-08
Ube2g1|ENSMUSG00000020794	-0.114507	6.18895	5.80317	0.022381	0.525181	0.0948075	6.18894	4.77567	0.0368614	0.182975	74.2446	73.2186	0.020077	0.891969	0.385333	0.500584
Ubtf|ENSMUSG00000020923	-0.126057	7.27521	9.27595	0.00491624	0.283567	-0.100482	7.27521	6.63037	0.016592	0.107779	170.782	145.541	0.230727	9.78575	2.38103e-08	7.18629e-07
Ubxn7|ENSMUSG00000053774	0.101088	6.16062	8.52274	0.0352747	0.601566	0.163711	6.16063	24.4683	0.000278673	0.00509171	62.559	75.5068	-0.271389	-16.8576	7.87924e-12	2.45431e-09
Unc13b|ENSMUSG00000028456	0.2116	4.10175	9.52393	0.00435068	0.270077	0.15877	4.10188	6.07904	0.0209985	0.126234	14.5705	18.7805	-0.366178	-9.74518	2.25798e-08	6.94691e-07
Upb1|ENSMUSG00000033427	-0.374951	2.90014	8.32406	0.00720022	0.323897	0.796057	2.90072	41.1129	4.56993e-07	2.76368e-05	5.85965	8.166	-0.478816	-6.17224	1.96511e-05	0.000153944
Vat1l|ENSMUSG00000046844	-0.258834	7.80091	4.41467	0.0441859	0.640154	0.423545	7.80134	14.0326	0.000769212	0.0113402	211.093	242.718	-0.201403	-2.80721	0.0175295	0.04161
Vdr|ENSMUSG00000022479	-0.587655	-0.54739	9.06238	0.0188432	0.508495	0.731036	-0.547032	15.303	0.00209851	0.0244186	0.628882	0.702122	-0.158932	-1.58189	0.133354	0.216907
Vill|ENSMUSG00000038775	1.20621	2.68391	21.1003	7.40435e-05	0.0352509	0.990167	2.68473	17.8342	0.000208328	0.00407057	1.81982	9.48176	-2.38136	-17.8974	1.90353e-09	1.15087e-07
Vmp1|ENSMUSG00000018171	-0.182297	7.03188	13.5984	0.000899382	0.131531	-0.119332	7.03174	6.8835	0.0135806	0.0935235	150.751	121.774	0.307959	10.24	6.35365e-08	1.49998e-06
Vps37d|ENSMUSG00000043614	0.298746	2.83788	11.393	0.00240518	0.200491	0.202589	2.83796	6.12826	0.0263927	0.147163	5.67089	7.8434	-0.467903	-9.39928	1.04444e-07	2.22917e-06
Vps52|ENSMUSG00000024319	-0.10024	5.88197	5.09824	0.0427176	0.633368	-0.0973544	5.88196	5.31443	0.0359087	0.180384	64.0783	55.8909	0.197222	7.05826	6.43917e-06	6.20736e-05
Vwa5b2|ENSMUSG00000046613	0.29716	4.33851	6.08845	0.0195688	0.509232	1.27511	4.33906	125.954	3.1763e-12	2.08135e-09	10.447	28.1544	-1.43027	-33.4528	1.8558e-14	4.60027e-11
Vwa7|ENSMUSG00000007030	-0.452555	1.5581	5.07446	0.0317954	0.582505	-0.628437	1.55823	10.7	0.00270801	0.0293624	4.43563	2.19166	1.01712	6.95053	1.74852e-05	0.00014009
Wbscr17|ENSMUSG00000034040	-0.292255	6.03839	6.36581	0.0172012	0.500628	0.255534	6.03861	5.6553	0.0240177	0.137823	67.9994	66.5055	0.0320483	0.493663	0.630475	0.721017
Wdr52|ENSMUSG00000071550	0.306007	1.69946	6.54689	0.0289036	0.564212	0.387795	1.69912	13.2565	0.00181229	0.0218295	2.22349	3.85512	-0.793949	-6.0458	2.0322e-05	0.000158087
Wdr92|ENSMUSG00000078970	-0.137266	7.48914	8.14416	0.0077793	0.336691	-0.20328	7.48901	21.4733	6.62516e-05	0.00163487	207.304	162.896	0.347802	13.5568	1.539e-08	5.20589e-07
Wnk4|ENSMUSG00000035112	-0.266678	3.09989	9.44395	0.00449643	0.27425	-0.672076	3.09958	67.7991	3.60698e-09	5.58107e-07	12.6103	6.69842	0.912704	13.1115	7.43215e-08	1.70619e-06
Wnt2b|ENSMUSG00000027840	-0.808537	-0.518032	8.27213	0.00736244	0.326059	1.08459	-0.517668	17.2892	0.000249386	0.00466072	0.722367	0.807832	-0.161324	-1.09789	0.291685	0.403036
Wnt4|ENSMUSG00000036856	-0.419285	1.45512	4.81304	0.0361743	0.610168	-0.416501	1.45507	5.50873	0.0257624	0.144977	3.73889	2.23083	0.745031	5.82997	0.0001439	0.000797491
Wwc1|ENSMUSG00000018849	-0.109551	6.78245	6.03951	0.0200224	0.509232	0.335432	6.78275	61.7451	9.49329e-09	1.1815e-06	99.5433	116.963	-0.232658	-8.63501	8.66244e-07	1.23256e-05
Wwp1|ENSMUSG00000041058	-0.126185	6.58406	7.55937	0.0100387	0.390595	0.093106	6.58416	4.80446	0.0363372	0.181686	98.0004	96.1405	0.0276429	1.05711	0.305271	0.417157
Zbtb18|ENSMUSG00000063659	-0.207158	7.34307	6.15076	0.0190075	0.508495	-0.174327	7.34303	5.2065	0.0298162	0.159779	190.425	147.102	0.372411	12.2378	2.771e-08	8.19122e-07
Zbtb20|ENSMUSG00000022708	0.223612	3.87477	4.98267	0.0332624	0.59015	-0.361733	3.87469	15.4525	0.00046541	0.00765653	14.9939	13.6075	0.139975	2.5758	0.024983	0.0556025
Zbtb34|ENSMUSG00000068966	-0.132652	4.49938	5.9314	0.0475033	0.659238	-0.165637	4.49935	10.2282	0.00811762	0.0650584	25.6463	20.7368	0.306559	10.1213	3.36393e-08	9.50667e-07
Zbtb46|ENSMUSG00000027583	-0.218835	3.70077	5.04863	0.0322009	0.583701	0.359969	3.70106	15.7061	0.000426276	0.00715597	12.3385	13.8117	-0.16272	-2.7014	0.0241707	0.0541259
Zfp189|ENSMUSG00000039634	0.250168	3.48223	5.11185	0.0312182	0.57997	0.452636	3.48238	18.4309	0.000171533	0.00347056	7.44437	12.7114	-0.771904	-9.69038	4.16388e-08	1.09604e-06
Zfp40|ENSMUSG00000002617	0.147899	5.23089	6.50002	0.0161693	0.495039	0.196357	5.23101	13.0942	0.00108347	0.0148513	31.7721	40.8045	-0.36097	-10.3807	1.31046e-08	4.55693e-07
Zfp52|ENSMUSG00000051341	0.242271	2.1887	5.52386	0.0362064	0.610168	0.339042	2.18869	12.2452	0.00186812	0.0224057	3.29737	5.16363	-0.647072	-8.88773	7.95645e-06	7.39477e-05
Zfp811|ENSMUSG00000055202	0.29549	2.17078	8.61916	0.0122791	0.431252	0.338677	2.17086	13.4152	0.00168606	0.0207288	3.30568	5.14977	-0.639561	-10.7584	5.76439e-09	2.49189e-07
Zfp871|ENSMUSG00000024298	0.119029	6.01704	5.86025	0.0217847	0.521742	-0.163232	6.01694	12.9303	0.0011513	0.015582	64.3064	62.8252	0.0336189	1.31225	0.207607	0.307425
Zfyve28|ENSMUSG00000037224	-0.134924	6.29755	6.64431	0.0151348	0.478589	-0.337338	6.29745	47.2814	1.28547e-07	1.00355e-05	94.9007	68.46	0.471157	16.7766	3.44329e-11	6.27305e-09
Zmynd8|ENSMUSG00000039671	-0.115647	6.88846	5.92583	0.0211211	0.520107	0.188761	6.88871	17.4414	0.000237107	0.00448897	114.157	120.728	-0.0807381	-2.41424	0.0326982	0.0693958
Znf41-ps|ENSMUSG00000084350	-0.361265	1.18443	6.32805	0.019035	0.508495	0.569111	1.18468	16.9808	0.000276387	0.00505532	2.14127	2.50428	-0.225927	-2.23646	0.0418045	0.0850003
Zyx|ENSMUSG00000029860	0.168609	4.4212	4.83084	0.0358559	0.608365	0.426616	4.42132	35.6204	1.56275e-06	7.582e-05	16.7305	25.0935	-0.584839	-19.4968	4.88001e-11	8.38395e-09

## Sheet: 152_DEGs
Differentially expressed genes (p<0.05) that overlap in contrast 3 and contrast 2 and whose gene expression values are not signficantly different (p>0.05) between Htt+/+ Hdac2 WT and HttQ111/+ Hdac2 KO (columns A-K). Resuts of unpaired t-test comparing expression levels in Htt+/+ Hdac2 WT vs. HttQ111/+ Hdac2 KO (columns L-Q)
	HttQ111/+ vs Htt+/+ in Hdac2 WT (contrast 3)					Hdac2 KO vs Hdac2 WT in HttQ111/+ (contrast 2)					Htt+/+ Hdac2 WT vs HttQ111/+ Hdac2 KO
id	logFC	logCPM	F	Pvalue	BH	logFC	logCPM	F	Pvalue	BH	mean_httwt_hdac2wt	mean_httq111_hdac2ko	log2FC	t_statistic	pvalue	BH
1110008L16Rik|ENSMUSG00000021023	-0.221856	2.85881	7.91203	0.0231496	0.531139	0.282922	2.85873	15.25	0.00190186	0.0226679	7.19695	7.49714	-0.058955	-1.77217	0.0944638	0.163521
4930539E08Rik|ENSMUSG00000048905	-0.29108	2.05248	4.9253	0.0342172	0.597761	0.491176	2.05284	15.6708	0.000431507	0.00719887	3.69432	4.12606	-0.159458	-1.80453	0.0910507	0.158961
6330403A02Rik|ENSMUSG00000053963	0.116799	7.65031	6.40138	0.0169209	0.499151	-0.161696	7.65022	13.7146	0.00086306	0.012425	201.812	196.331	0.0397219	1.26486	0.226732	0.329584
Abca8a|ENSMUSG00000041828	-0.331893	5.02245	10.1114	0.00342427	0.240527	0.356016	5.02233	12.3368	0.00143789	0.0183612	33.2964	34.2199	-0.0394666	-0.636068	0.534023	0.640606
Abhd14a|ENSMUSG00000042210	0.358266	4.59052	6.49027	0.016242	0.496206	-0.475847	4.59047	13.2938	0.0010066	0.0140328	23.963	21.9586	0.126025	1.66142	0.115719	0.193359
Ago4|ENSMUSG00000042500	-0.236937	5.67394	6.97377	0.0130329	0.445849	0.239103	5.67431	8.10669	0.00791021	0.0639031	51.5469	52.9983	-0.0400601	-0.691527	0.499375	0.609762
AI182371|ENSMUSG00000035875	-0.783421	-1.75115	4.76395	0.0370687	0.612374	0.946087	-1.75134	8.63774	0.00630263	0.0543685	0.250151	0.29071	-0.21678	-1.08089	0.296645	0.408198
AI597468|ENSMUSG00000060935	-0.0980933	6.32035	5.07447	0.0379308	0.614628	0.135194	6.32043	11.2638	0.00217001	0.0249631	78.6065	81.1385	-0.0457386	-1.55213	0.144131	0.231079
Aldh7a1|ENSMUSG00000053644	0.154842	6.56212	4.78339	0.0367116	0.611985	-0.152682	6.56218	5.29711	0.0285316	0.154828	91.9593	92.3754	-0.0065133	-0.155147	0.879097	0.915172
Alyref2|ENSMUSG00000060244	-0.337234	1.37226	11.2366	0.0201879	0.509232	0.314321	1.37211	11.2748	0.0203658	0.123817	2.72449	2.71809	0.00339331	0.0846327	0.933596	0.953432
Amz1|ENSMUSG00000050022	-0.170776	5.10332	4.61148	0.0400061	0.62067	0.254379	5.10354	11.6834	0.00184453	0.0221537	33.2974	35.2551	-0.0824232	-1.72964	0.109691	0.185044
Ass1|ENSMUSG00000076441	-0.1632	3.53602	4.89408	0.047132	0.658887	0.158501	3.53613	5.15548	0.0408625	0.196476	11.8046	11.8151	-0.0012786	-0.0301745	0.976289	0.983305
Atp6v0c|ENSMUSG00000024121	0.494872	6.41287	10.5213	0.00290508	0.22184	-0.307051	6.41296	4.94702	0.0338605	0.173878	76.2991	87.243	-0.193374	-1.42489	0.185278	0.281419
B430218F22Rik|ENSMUSG00000097411	0.710479	-1.62933	4.52233	0.0418425	0.631654	-0.716254	-1.62949	6.03336	0.0200867	0.122728	0.254722	0.239747	0.0874105	0.363124	0.722521	0.795002
Caap1|ENSMUSG00000028578	-0.184948	3.37247	7.50796	0.0283782	0.56264	0.158031	3.37243	6.20554	0.04608	0.212259	10.5744	10.4471	0.0174774	0.415586	0.684196	0.765737
Cacna2d1|ENSMUSG00000040118	0.149043	5.94836	11.8618	0.00240978	0.200491	-0.208977	5.94812	26.5961	1.52146e-05	0.000497736	61.683	59.3997	0.0544161	1.90376	0.0756918	0.137099
Camk4|ENSMUSG00000038128	-0.128101	9.78982	5.41113	0.0269935	0.556729	0.148501	9.78993	8.69104	0.00616197	0.0535587	878.274	894.046	-0.0256767	-0.845361	0.410237	0.524339
Cdh23|ENSMUSG00000012819	0.548234	0.224557	6.49927	0.0161749	0.495039	-0.588126	0.224606	8.246	0.00744947	0.0612762	0.999147	1.00548	-0.00911682	-0.0689152	0.946075	0.962099
Cdk2ap1|ENSMUSG00000029394	-0.23273	3.47176	8.74338	0.00602369	0.30456	0.208262	3.47206	8.0056	0.00826386	0.0659534	11.158	11.0161	0.0184544	0.637633	0.538458	0.644479
Cenpb|ENSMUSG00000068267	0.0964141	7.10522	7.12489	0.0324889	0.583708	-0.130999	7.10517	15.5376	0.00188617	0.0225591	138.644	135.536	0.032711	1.49035	0.16274	0.254197
Cldn26|ENSMUSG00000022715	-1.0331	-0.0497091	12.2014	0.00151204	0.16185	0.704898	-0.0492355	6.3192	0.0175823	0.111926	1.04085	0.888877	0.22771	2.0309	0.0589854	0.112178
Cntn5|ENSMUSG00000039488	-0.289414	4.18478	12.1699	0.00153017	0.16185	0.18767	4.18483	5.67071	0.023842	0.137181	19.3311	17.9282	0.108691	1.60892	0.130529	0.21323
Coch|ENSMUSG00000020953	-0.297486	7.44623	6.25756	0.0180858	0.505157	0.357387	7.44662	10.6053	0.00281173	0.0302011	170.113	182.905	-0.104601	-1.78325	0.0927842	0.161267
Col6a4|ENSMUSG00000032572	0.740423	3.48875	4.22104	0.0487761	0.668779	-1.04289	3.48909	9.03764	0.00532622	0.0481716	11.0411	9.2659	0.252886	1.06458	0.303999	0.415976
Col6a6|ENSMUSG00000043719	-0.818767	-1.62431	4.90494	0.0345634	0.597761	0.977452	-1.62459	8.67227	0.00621112	0.0537174	0.332903	0.339028	-0.0263038	-0.120037	0.90594	0.934402
Coro2a|ENSMUSG00000028337	-0.209945	3.81409	9.28987	0.00703815	0.319965	0.152321	3.81433	5.53268	0.0379428	0.186825	14.2069	13.6849	0.0540022	1.19443	0.249073	0.355187
Crebbp|ENSMUSG00000022521	0.196433	5.79923	10.2703	0.00321206	0.230369	-0.165639	5.79921	8.30632	0.00725904	0.0603394	53.9262	55.2676	-0.035449	-1.16577	0.265657	0.373768
Cxx1c|ENSMUSG00000051851	0.152082	6.96855	12.2533	0.00148256	0.161845	-0.0985341	6.96842	6.03424	0.0200784	0.122728	121.233	125.69	-0.0520812	-1.81009	0.0896887	0.156978
Dapp1|ENSMUSG00000028159	0.272349	3.48957	6.37862	0.0170996	0.500628	-0.30191	3.48959	8.95654	0.00551015	0.0494445	10.8995	10.9055	-0.000791531	-0.0119511	0.990609	0.993381
Dbpht2|ENSMUSG00000029878	-0.232919	6.30486	8.99393	0.00542124	0.290784	0.190822	6.30506	6.83284	0.0138958	0.0948949	81.0586	79.1076	0.0351492	0.762271	0.457329	0.570658
Ddit3|ENSMUSG00000025408	-0.137372	4.47287	6.62906	0.0428675	0.633368	0.205387	4.47297	16.9629	0.00120867	0.0161548	22.1026	23.1052	-0.064002	-1.98078	0.0667299	0.124051
Dtwd1|ENSMUSG00000023330	-0.278273	3.02677	13.4009	0.00296383	0.222794	0.212552	3.02665	9.23528	0.014519	0.098059	8.58443	8.28989	0.0503687	1.06599	0.304458	0.416375
DXBay18|ENSMUSG00000071745	-0.907757	-1.71579	6.08393	0.0196102	0.509232	1.39214	-1.71566	16.5097	0.000323883	0.00574659	0.250108	0.326441	-0.384274	-2.00378	0.068312	0.126356
Efnb3|ENSMUSG00000003934	-0.0994664	7.75749	6.78101	0.0266166	0.553339	0.121769	7.75755	11.2356	0.00409313	0.0398523	212.737	216.609	-0.0260217	-1.08826	0.296354	0.407928
Eps8|ENSMUSG00000015766	-0.145758	4.66354	8.33935	0.0233914	0.532473	0.178071	4.66372	14.1725	0.00322785	0.0335583	25.2096	25.7836	-0.0324799	-1.22964	0.246556	0.352118
Fam84a|ENSMUSG00000020607	0.138825	6.14207	10.8501	0.00351922	0.243967	-0.184323	6.14192	21.8919	5.84052e-05	0.00147084	69.7297	67.4517	0.0479192	1.81414	0.0931979	0.161733
Faxc|ENSMUSG00000028246	0.132351	5.35438	6.35219	0.0173098	0.500628	-0.123096	5.35425	6.35452	0.0172973	0.110893	39.9159	40.174	-0.00929777	-0.287356	0.778141	0.83933
Fgf17|ENSMUSG00000022101	-0.827613	-0.441773	11.1989	0.00222371	0.194967	0.870226	-0.441322	13.2572	0.00102024	0.0141769	0.677609	0.719442	-0.0864267	-0.896023	0.383012	0.498203
Fgf3|ENSMUSG00000031074	-0.448943	3.2063	11.109	0.00230327	0.197601	0.47604	3.2067	14.5275	0.000644293	0.00984991	9.08113	9.53845	-0.0708828	-0.973914	0.348405	0.463082
Fig4|ENSMUSG00000038417	-0.124149	5.75277	6.54956	0.0158057	0.490598	0.125129	5.75282	7.30773	0.0112271	0.081955	53.327	53.359	-0.000865564	-0.0273786	0.978478	0.984663
Gli3|ENSMUSG00000021318	-0.178899	4.95499	6.17184	0.0188215	0.508495	0.173084	4.95524	6.66176	0.0150204	0.100418	32.051	31.8379	0.00962539	0.196375	0.847175	0.891514
Gm10709|ENSMUSG00000074516	0.84181	2.15731	5.44768	0.0265223	0.553339	-0.697576	2.15731	4.45971	0.0431971	0.203654	3.82835	4.2074	-0.136209	-0.908729	0.37719	0.492253
Gm11353|ENSMUSG00000060198	-0.246758	2.5795	9.7177	0.0183554	0.506829	0.233812	2.57953	9.63363	0.0171854	0.110478	6.26485	6.25101	0.00319174	0.0751191	0.941108	0.958503
Gm11542|ENSMUSG00000085051	1.01949	-2.30271	5.05491	0.0321017	0.583701	-0.854664	-2.30274	4.54885	0.0412955	0.197949	0.126469	0.139923	-0.145846	-0.502108	0.622231	0.714226
Gm11953|ENSMUSG00000082816	1.17271	-2.20783	8.10444	0.00791384	0.340792	-0.805774	-2.20795	4.78441	0.0367014	0.18255	0.149333	0.188662	-0.337272	-1.09005	0.301325	0.413098
Gm12060|ENSMUSG00000085415	-0.621343	0.206696	9.75755	0.00395339	0.262527	0.391016	0.206571	4.44898	0.0434325	0.204539	1.29164	1.11321	0.214472	1.49853	0.157259	0.247664
Gm12184|ENSMUSG00000078154	-0.310961	3.89349	11.3601	0.00208835	0.192308	0.273775	3.89374	10.0698	0.00348478	0.035373	15.2537	14.8652	0.0372234	0.926276	0.368654	0.48355
Gm12216|ENSMUSG00000081769	0.750007	-1.5743	5.73617	0.0231039	0.531139	-0.653776	-1.57424	5.3934	0.027233	0.15025	0.25672	0.260708	-0.0222421	-0.0973706	0.923571	0.94648
Gm12583|ENSMUSG00000082878	0.858829	-1.06693	7.04812	0.0126039	0.43817	-0.714612	-1.06708	5.69778	0.0235366	0.136233	0.359094	0.407902	-0.183861	-0.827842	0.419342	0.533228
Gm13139|ENSMUSG00000067916	-0.424123	1.31638	4.5231	0.0418263	0.631654	0.460041	1.31656	5.94141	0.0209733	0.126174	2.54132	2.60262	-0.0343878	-0.267203	0.793332	0.850799
Gm136|ENSMUSG00000071015	0.701118	-1.08494	4.90594	0.0345462	0.597761	-1.00473	-1.08515	11.9505	0.00166503	0.0205438	0.438132	0.327836	0.41839	2.02866	0.0596892	0.113293
Gm17322|ENSMUSG00000097604	0.348041	1.97665	8.62521	0.00633263	0.30456	-0.486106	1.97628	20.5651	8.74282e-05	0.00205134	3.86665	3.62926	0.0914075	1.57473	0.135154	0.2193
Gm26645|ENSMUSG00000097684	-0.499804	3.52992	9.10778	0.00516933	0.287551	0.348601	3.53024	5.21778	0.0296528	0.159202	13.0286	11.4948	0.180705	1.92501	0.0861619	0.151977
Gm2986|ENSMUSG00000083700	-1.13982	-1.82946	10.8807	0.00251938	0.204643	0.859498	-1.82932	6.69757	0.014777	0.099255	0.340205	0.282307	0.269138	1.74952	0.099802	0.171157
Gm3756|ENSMUSG00000091639	-0.588541	-0.896338	7.1462	0.0234366	0.532473	0.734104	-0.896313	12.6021	0.00256504	0.028114	0.519579	0.577947	-0.153593	-1.2938	0.215354	0.316546
Gm5424|ENSMUSG00000046687	-0.134011	6.04009	6.62814	0.0152471	0.481253	0.116445	6.04017	5.53643	0.0254222	0.143438	66.0148	65.443	0.0125502	0.430287	0.67256	0.756652
Gm5900|ENSMUSG00000094685	-0.285893	3.56417	6.07283	0.0197124	0.509232	0.309194	3.5642	7.97407	0.00837765	0.0666448	12.0964	12.2617	-0.0195786	-0.273711	0.788868	0.847548
Gm6104|ENSMUSG00000062588	-0.196566	3.02156	5.89574	0.0341589	0.597761	0.211793	3.02156	7.84505	0.0141429	0.0960475	8.04585	8.19115	-0.0258212	-0.504123	0.620647	0.712784
Gm6382|ENSMUSG00000082675	-0.140068	4.27783	8.35738	0.046363	0.654825	0.175207	4.27785	14.8319	0.00782593	0.063431	19.4201	19.9275	-0.0372102	-1.21414	0.248379	0.35446
Gm8995|ENSMUSG00000063286	-0.224453	2.51874	5.68303	0.0345171	0.597761	0.231409	2.51884	6.76301	0.0224869	0.131903	5.83984	5.90359	-0.0156627	-0.326689	0.748159	0.816225
Gm9083|ENSMUSG00000083033	-0.708113	-1.09396	5.34066	0.0279285	0.56264	0.634926	-1.09382	4.77907	0.036799	0.182824	0.504446	0.497404	0.0202815	0.114118	0.910751	0.938165
Gpatch11|ENSMUSG00000050668	-0.12788	5.30861	4.27521	0.0474405	0.659238	0.214371	5.30842	13.668	0.000877834	0.0125955	39.123	41.3075	-0.0783887	-2.11496	0.0607541	0.115025
Gpr1|ENSMUSG00000046856	0.629688	-0.695988	8.54408	0.0110376	0.406117	-0.691514	-0.696062	11.871	0.00275523	0.0297119	0.490138	0.488281	0.00547666	0.0337996	0.973661	0.981182
Gpr150|ENSMUSG00000045509	0.695558	-0.374816	7.98356	0.00833904	0.350702	-0.56378	-0.3751	6.69206	0.0148142	0.0993833	0.629826	0.702632	-0.157816	-1.31919	0.206082	0.305635
Gpr153|ENSMUSG00000042804	-0.300592	4.35228	5.84441	0.0219485	0.521742	0.418304	4.35271	12.5691	0.00131747	0.0171811	19.1824	20.8758	-0.122045	-1.98012	0.0673635	0.125029
Gpr68|ENSMUSG00000047415	-0.439952	1.33953	6.93271	0.0132766	0.451483	0.425948	1.33955	7.42844	0.0106413	0.0790654	2.6233	2.55	0.040887	0.372891	0.713907	0.788123
H2-T10|ENSMUSG00000079491	-0.509456	1.80413	10.3325	0.00313288	0.228487	0.674995	1.80448	19.3361	0.000128379	0.00278397	3.45425	3.62858	-0.0710326	-0.564117	0.583676	0.682327
Hivep2|ENSMUSG00000015501	0.0877314	8.11203	4.61596	0.0491594	0.669366	-0.124592	8.11206	10.4242	0.00302215	0.0318243	280.929	273.609	0.0380902	1.32045	0.209123	0.309246
Hmgcl|ENSMUSG00000028672	-0.180676	4.5712	9.78437	0.00623209	0.30456	0.136427	4.57122	6.22632	0.0272077	0.150158	24.9441	24.1965	0.0438977	1.1664	0.262195	0.370007
Hmgn2|ENSMUSG00000003038	-0.175184	5.58175	7.96404	0.00840998	0.350702	0.133408	5.58175	5.33866	0.0279631	0.152832	48.2432	46.8998	0.0407447	1.03882	0.313854	0.426368
Htr4|ENSMUSG00000026322	-0.447823	2.42965	15.6214	0.000438345	0.0905156	0.317713	2.4298	8.96979	0.00547963	0.0492995	5.61976	5.13876	0.129089	1.52245	0.148607	0.236789
Ids|ENSMUSG00000035847	0.125623	9.23152	15.9784	0.00563712	0.296364	-0.107767	9.23141	13.1355	0.0116415	0.084151	586.791	594.858	-0.0196999	-1.03062	0.317498	0.43014
Ift57|ENSMUSG00000032965	-0.106952	5.59344	6.31215	0.0401286	0.62067	0.110546	5.59335	7.98261	0.0226967	0.132817	48.949	49.0786	-0.00381472	-0.132973	0.896726	0.927792
Il1a|ENSMUSG00000027399	-0.535877	-0.0813156	6.2715	0.0179691	0.504255	0.460929	-0.0812459	5.47649	0.0261645	0.146422	1.05223	1.00704	0.0633307	0.540304	0.595997	0.692705
Lama3|ENSMUSG00000024421	0.245323	2.92688	6.37262	0.0171471	0.500628	-0.369716	2.92703	16.2119	0.000358359	0.00619196	7.70103	7.22254	0.092544	1.4911	0.160336	0.251165
Lamp5|ENSMUSG00000027270	0.169747	6.5552	11.5847	0.00191439	0.182802	-0.228779	6.55499	24.7856	2.51581e-05	0.000752609	95.785	91.9387	0.0591276	1.46455	0.170912	0.264343
Limd2|ENSMUSG00000040699	-0.122538	5.85102	9.13049	0.0142009	0.461174	0.0975223	5.8511	6.5938	0.035985	0.180608	58.8354	57.8909	0.0233477	1.18937	0.25079	0.357019
Lpar2|ENSMUSG00000031861	-0.593729	-0.167759	6.18695	0.0186895	0.508495	0.785827	-0.167678	13.055	0.00109932	0.0150058	0.839591	0.954291	-0.184741	-1.27522	0.227069	0.329992
Lrp1b|ENSMUSG00000049252	0.091394	6.99127	4.5835	0.0423236	0.632562	-0.088912	6.99116	4.8454	0.035606	0.179591	124.616	125.977	-0.0156691	-0.623847	0.545525	0.650402
Lrrk2|ENSMUSG00000036273	-0.15386	7.88473	10.3325	0.00313285	0.228487	0.171163	7.88494	14.3658	0.000682531	0.010238	235.825	243.534	-0.046405	-1.55676	0.140265	0.225903
Lss|ENSMUSG00000033105	0.162752	4.22196	6.88731	0.0215625	0.521742	-0.132217	4.22203	5.13674	0.0474769	0.216176	17.6869	18.2126	-0.0422544	-1.31335	0.214557	0.315588
Lynx1|ENSMUSG00000022594	-0.17082	8.66005	5.94776	0.0209041	0.517309	0.170986	8.66034	6.95102	0.0131726	0.0917474	406.778	409.892	-0.0110026	-0.306601	0.764346	0.829037
Mettl9|ENSMUSG00000030876	-0.104824	6.67903	8.36822	0.0222665	0.524931	0.107555	6.67908	10.3097	0.0122866	0.0873074	103.222	103.606	-0.00535525	-0.22224	0.826941	0.87644
Minos1|ENSMUSG00000050608	-0.110451	6.13218	10.2388	0.0215416	0.521742	0.112754	6.13222	12.5267	0.0120279	0.086039	70.9062	70.9673	-0.00124444	-0.0631677	0.950418	0.965045
Mphosph9|ENSMUSG00000038126	0.115243	5.16184	6.90194	0.0448952	0.64336	-0.14064	5.16177	12.0953	0.00868564	0.0683666	35.6976	35.0822	0.0250887	1.02777	0.319703	0.432485
Myh11|ENSMUSG00000018830	0.238575	2.66624	4.34452	0.045791	0.650099	-0.290242	2.66637	7.4646	0.0104724	0.0782815	6.26702	5.95751	0.0730699	0.984081	0.339295	0.453195
Ncor2|ENSMUSG00000029478	0.144164	6.72315	8.08451	0.0079823	0.34121	-0.11635	6.72316	6.19423	0.0186326	0.116454	102.625	103.844	-0.0170386	-0.562948	0.581077	0.680216
Nedd9|ENSMUSG00000021365	-0.210842	3.77822	6.05189	0.0199066	0.509232	0.23169	3.7782	8.68138	0.00618722	0.0536076	13.7915	14.0179	-0.0234875	-0.366018	0.719491	0.792472
Nell2|ENSMUSG00000022454	0.180068	7.84283	13.9831	0.000782177	0.124459	-0.12802	7.84268	7.74319	0.00926442	0.0716095	220.437	230.027	-0.0614393	-1.65361	0.117578	0.195703
Nkx2-2|ENSMUSG00000027434	-0.238917	2.26464	5.11424	0.0376742	0.614628	0.231748	2.26461	5.34775	0.031816	0.166612	4.94105	4.89205	0.0143777	0.25382	0.803772	0.858544
Nova1|ENSMUSG00000021047	0.0973808	6.24158	6.30442	0.0394287	0.618556	-0.0881758	6.2415	5.78433	0.0471089	0.214969	74.2921	74.9812	-0.0133198	-0.803336	0.433939	0.54759
Npl|ENSMUSG00000042684	-0.215833	3.1008	4.57749	0.0406956	0.623461	0.199336	3.10102	4.41594	0.0441663	0.206917	8.55866	8.54552	0.00221547	0.0305887	0.975965	0.983063
Nubp2|ENSMUSG00000039183	-0.191555	4.35809	9.15144	0.00581539	0.300211	0.142566	4.35806	5.82973	0.0280939	0.153313	21.0413	20.3803	0.0460457	1.03052	0.319777	0.43252
Osbpl1a|ENSMUSG00000044252	0.44005	7.00634	17.8268	0.000208493	0.0597235	-0.570704	7.00622	33.7968	2.4075e-06	0.000111153	126.753	116.645	0.119901	1.61773	0.131039	0.213802
P2ry1|ENSMUSG00000027765	0.347698	3.40003	5.89794	0.0214006	0.521742	-0.356211	3.39962	7.14414	0.0120775	0.0862855	9.61619	9.80806	-0.0285022	-0.280565	0.784199	0.844156
Pcdhb14|ENSMUSG00000044043	0.159559	3.95766	4.95336	0.0346357	0.598409	-0.201764	3.95754	9.25046	0.00487436	0.0450334	14.8254	14.5536	0.0266928	0.683019	0.503821	0.613581
Picalm|ENSMUSG00000039361	-0.0991854	7.93733	7.52329	0.0273675	0.559727	0.132277	7.93731	15.4198	0.00175868	0.021407	241.702	247.508	-0.034244	-1.34169	0.205308	0.304905
Pik3ip1|ENSMUSG00000034614	0.144263	4.25904	7.39677	0.0406218	0.623461	-0.138407	4.25889	7.89072	0.0361862	0.181247	18.6515	18.7408	-0.00689265	-0.231166	0.819948	0.87121
Pla2g3|ENSMUSG00000034579	-0.385204	1.52258	14.0075	0.00692608	0.318523	0.307461	1.5228	10.0129	0.022347	0.131492	2.98735	2.85217	0.0668039	1.17502	0.257429	0.364676
Pla2g7|ENSMUSG00000023913	-0.140076	7.22655	9.59002	0.00423409	0.26977	0.130148	7.22658	9.73707	0.0039893	0.0390851	153.783	152.771	0.00952757	0.330346	0.745229	0.81395
Plekhg4|ENSMUSG00000014782	-0.292818	2.75469	4.50253	0.0422629	0.632562	0.386729	2.75513	8.77532	0.00594647	0.0521998	6.41765	7.19687	-0.165326	-2.05237	0.0587762	0.111891
Plekhm3|ENSMUSG00000051344	0.141311	6.1076	12.1347	0.00311743	0.228487	-0.176602	6.1075	22.1387	8.49745e-05	0.00199923	68.3165	66.6503	0.0356226	1.361	0.201309	0.30038
Plxdc1|ENSMUSG00000017417	-0.255438	4.75704	13.7134	0.00086246	0.128537	0.313984	4.7574	23.1697	4.00209e-05	0.00108914	26.7404	27.7875	-0.0554162	-1.07195	0.308679	0.420851
Ppargc1a|ENSMUSG00000029167	-0.114749	5.80664	6.88468	0.0222343	0.524931	0.0935677	5.80659	5.44563	0.0464986	0.213262	57.1618	56.2377	0.0235135	0.78241	0.445907	0.559221
Ppil6|ENSMUSG00000078451	-0.371855	1.15114	6.1973	0.0186324	0.508495	0.482484	1.15119	12.1695	0.00153187	0.0192254	2.2113	2.40701	-0.122351	-1.17719	0.25611	0.363133
Ppp1r1b|ENSMUSG00000061718	-0.275833	10.6063	27.9469	1.05398e-05	0.0138955	0.315327	10.6066	41.2946	4.39534e-07	2.67695e-05	1519.52	1567.7	-0.045033	-1.89726	0.074958	0.136011
Prkci|ENSMUSG00000037643	-0.108447	6.69129	5.81658	0.0222394	0.524931	0.121389	6.69136	8.10144	0.00792817	0.063988	103.298	104.309	-0.014045	-0.557416	0.58451	0.682899
Prkg1|ENSMUSG00000052920	0.304979	1.92938	4.63629	0.0395111	0.618556	-0.438186	1.92937	11.1806	0.00224146	0.0255456	3.76515	3.37271	0.158802	1.60784	0.13606	0.220523
Prss45|ENSMUSG00000047257	-1.01685	-1.14661	4.73926	0.0375277	0.614628	0.993864	-1.14663	5.26133	0.0290314	0.156895	0.577947	0.516775	0.161402	0.563628	0.580444	0.679684
Prss56|ENSMUSG00000036480	0.673712	1.41572	8.44357	0.00684143	0.316052	-0.429048	1.41561	4.23258	0.0484973	0.219352	2.33809	2.60851	-0.157892	-0.797585	0.442726	0.556236
Ptp4a2|ENSMUSG00000028788	-0.102297	7.51574	6.6238	0.0229617	0.530091	0.0967488	7.51577	6.79962	0.0216275	0.128575	185.477	184.563	0.007125	0.316628	0.756144	0.822919
Rab3ip|ENSMUSG00000064181	-0.136111	5.17361	7.37517	0.0172764	0.500628	0.146275	5.17373	9.55565	0.00614919	0.0534746	36.4566	36.7515	-0.0116235	-0.466658	0.64667	0.734359
Rab6a|ENSMUSG00000030704	0.109881	6.69778	8.2707	0.0158581	0.490598	-0.0878361	6.6977	6.17376	0.0387309	0.189355	100.479	102.384	-0.0270986	-1.43992	0.16875	0.261536
Rbbp7|ENSMUSG00000031353	-0.0944344	6.94618	5.67768	0.03717	0.612374	0.096378	6.94619	6.84001	0.0228164	0.133245	124.304	124.574	-0.00313098	-0.115972	0.910146	0.93776
Rbp4|ENSMUSG00000024990	-0.447501	4.10848	16.2189	0.000356996	0.0785836	0.466663	4.10892	19.733	0.000113272	0.00252001	16.5581	16.9992	-0.0379291	-0.492286	0.629112	0.720171
Riok3|ENSMUSG00000024404	-0.252475	6.33507	14.3252	0.000691669	0.116221	0.189274	6.33504	9.27089	0.00483321	0.0447979	85.3272	82.1508	0.054731	1.13328	0.280727	0.3906
RP24-113D21.1|ENSMUSG00000098495	-0.456964	0.814585	7.34944	0.011016	0.406117	0.586674	0.814781	13.7477	0.000852755	0.0122973	1.68283	1.8147	-0.108836	-1.24511	0.231286	0.334945
Rpl29|ENSMUSG00000048758	0.699475	5.59657	4.34939	0.0456775	0.650099	-0.697566	5.59657	4.89754	0.0346983	0.176733	43.2864	43.5027	-0.00719151	-0.0636275	0.950235	0.964916
Rps6ka5|ENSMUSG00000021180	-0.278139	6.59864	13.4118	0.000962899	0.133384	0.174261	6.59872	6.23451	0.0182868	0.11503	101.517	94.6162	0.101568	1.97161	0.0698461	0.128536
Scaf1|ENSMUSG00000038406	0.0991907	6.91745	8.24487	0.0282259	0.56264	-0.108217	6.91752	10.6692	0.010666	0.0791998	120.567	119.743	0.00988761	0.468861	0.647929	0.735405
Scn3b|ENSMUSG00000049281	0.177767	6.27727	11.9798	0.00164498	0.166824	-0.151429	6.27712	9.98806	0.00360204	0.0363057	76.0791	77.7209	-0.0308022	-0.915219	0.375682	0.490728
Scube2|ENSMUSG00000007279	-0.703355	-0.91229	7.9278	0.0108945	0.403285	0.611171	-0.912137	6.7455	0.0190539	0.118551	0.523243	0.493958	0.0830939	0.675934	0.509253	0.618546
Setmar|ENSMUSG00000034639	-0.31817	1.09077	4.92368	0.0449915	0.644201	0.304875	1.09071	5.37134	0.0362542	0.181482	2.14343	2.1861	-0.028441	-0.322067	0.751665	0.819432
Sez6|ENSMUSG00000000632	-0.136061	9.28863	9.10881	0.00516711	0.287551	0.179319	9.28882	17.0093	0.000273771	0.00501282	605.542	626.584	-0.0492803	-1.70863	0.105875	0.17969
Shank2|ENSMUSG00000037541	0.149863	5.34616	5.06606	0.0319266	0.583182	-0.135208	5.3462	4.72543	0.0377961	0.186269	39.818	40.1212	-0.010943	-0.342317	0.736902	0.806785
Sik1|ENSMUSG00000024042	-0.442039	4.16912	9.50721	0.00438073	0.270077	0.519674	4.16934	15.0873	0.000528689	0.00843302	18.3399	18.883	-0.0421055	-0.371056	0.717779	0.791085
Slc29a1|ENSMUSG00000023942	-0.295874	5.27564	20.4994	8.90442e-05	0.0412467	0.281918	5.27577	21.08	7.46566e-05	0.00179835	39.727	39.3046	0.015423	0.401619	0.693	0.772166
Smad7|ENSMUSG00000025880	-0.225708	4.52417	8.38135	0.00702574	0.319965	0.262282	4.52434	12.7635	0.00122507	0.0162979	22.8347	23.4378	-0.0376082	-0.928741	0.370141	0.484915
Snrk|ENSMUSG00000038145	0.172624	5.29309	11.285	0.00215023	0.194967	-0.135398	5.29311	7.87401	0.00875013	0.0686662	37.8449	38.9193	-0.0403871	-1.3054	0.216197	0.317435
Sstr5|ENSMUSG00000050824	-1.82021	2.42501	18.8547	0.000149395	0.0522546	1.11924	2.42478	7.20812	0.0117368	0.0845505	7.04576	4.92812	0.515717	1.86866	0.0918912	0.159965
St6galnac6|ENSMUSG00000026811	0.0946608	6.83596	5.67172	0.0374768	0.614628	-0.115743	6.83592	9.88731	0.00647754	0.0554066	115.536	114.349	0.0148935	0.548656	0.59261	0.690225
Strn|ENSMUSG00000024077	-0.205979	9.21151	13.2936	0.00100559	0.134647	0.173172	9.21157	10.8479	0.0025542	0.0280131	604.287	588.533	0.0381105	1.04138	0.314864	0.427439
Syndig1l|ENSMUSG00000071234	-0.148332	8.67942	5.09712	0.0314442	0.57997	0.164072	8.67971	6.91987	0.0133592	0.0924803	405.875	412.5	-0.0233606	-0.627301	0.540032	0.64568
Tbc1d4|ENSMUSG00000033083	-0.290587	5.25712	13.7714	0.000844494	0.128231	0.349486	5.25744	23.1971	3.9702e-05	0.00108235	37.7967	39.8857	-0.0776127	-1.58148	0.132358	0.215509
Tcerg1|ENSMUSG00000024498	0.151007	5.77132	10.3466	0.00311522	0.228487	-0.121903	5.77111	7.8321	0.00995615	0.0753623	52.9348	54.4122	-0.0397123	-1.55096	0.146337	0.233881
Tdrkh|ENSMUSG00000041912	-0.124398	5.4436	5.86015	0.0217858	0.521742	0.133451	5.44369	7.90289	0.00864079	0.0681483	43.8123	44.1972	-0.0126193	-0.340092	0.74143	0.810616
Tmeff1|ENSMUSG00000028347	-0.14869	6.46425	13.3859	0.00142148	0.158521	0.100069	6.46416	6.98838	0.0225765	0.132248	90.1423	87.2614	0.0468617	1.85338	0.0848285	0.150122
Tmem196|ENSMUSG00000048004	0.259867	1.83509	5.50887	0.0436814	0.638081	-0.322097	1.83484	9.94237	0.00698106	0.0585162	3.42847	3.36908	0.0252071	0.382313	0.707123	0.783282
Tmprss6|ENSMUSG00000016942	-0.671261	1.85121	8.62055	0.00634516	0.30456	0.755571	1.85187	12.5809	0.00131167	0.017135	3.20645	3.63921	-0.182647	-1.1212	0.280928	0.390723
Tnfaip8l3|ENSMUSG00000074345	0.232295	2.70334	6.68357	0.0223449	0.525181	-0.188876	2.70342	5.22542	0.0429346	0.202862	6.18451	6.34417	-0.0367718	-0.558231	0.584141	0.682634
Tox2|ENSMUSG00000074607	0.284995	2.34231	7.81701	0.00950165	0.380488	-0.230809	2.34237	6.18443	0.0242221	0.138772	4.88226	5.00582	-0.036057	-0.939108	0.360995	0.475914
Tpm2|ENSMUSG00000028464	-0.450203	4.07559	14.5612	0.000635822	0.111017	0.318413	4.07593	8.42871	0.00688871	0.0579563	18.2326	16.7157	0.125312	1.616	0.136613	0.22115
Trhr|ENSMUSG00000038760	0.860111	-1.57873	4.1806	0.0498003	0.66942	-0.791953	-1.57869	4.48986	0.0425432	0.201845	0.262488	0.226908	0.210143	0.542937	0.59462	0.691641
Trmt10a|ENSMUSG00000004127	-0.196622	3.16186	7.78524	0.0283393	0.56264	0.204693	3.1619	9.50678	0.0143175	0.0970798	9.14787	9.21286	-0.0102123	-0.295496	0.771218	0.8343
Tsc2|ENSMUSG00000002496	0.116962	6.76545	11.862	0.0103074	0.394329	-0.101244	6.76554	10.0609	0.0172133	0.110478	107.555	108.899	-0.0179208	-0.887419	0.388652	0.503614
Tst|ENSMUSG00000044986	-0.195794	4.4523	9.63538	0.00418893	0.26885	0.169877	4.45236	8.23229	0.00807805	0.0648623	22.215	21.7711	0.0291215	0.851931	0.406717	0.520838
Ube2g1|ENSMUSG00000020794	-0.114507	6.18895	5.80317	0.022381	0.525181	0.0948075	6.18894	4.77567	0.0368614	0.182975	74.2446	73.2186	0.020077	0.891969	0.385333	0.500584
Vdr|ENSMUSG00000022479	-0.587655	-0.54739	9.06238	0.0188432	0.508495	0.731036	-0.547032	15.303	0.00209851	0.0244186	0.628882	0.702122	-0.158932	-1.58189	0.133354	0.216907
Wbscr17|ENSMUSG00000034040	-0.292255	6.03839	6.36581	0.0172012	0.500628	0.255534	6.03861	5.6553	0.0240177	0.137823	67.9994	66.5055	0.0320483	0.493663	0.630475	0.721017
Wnt2b|ENSMUSG00000027840	-0.808537	-0.518032	8.27213	0.00736244	0.326059	1.08459	-0.517668	17.2892	0.000249386	0.00466072	0.722367	0.807832	-0.161324	-1.09789	0.291685	0.403036
Wwp1|ENSMUSG00000041058	-0.126185	6.58406	7.55937	0.0100387	0.390595	0.093106	6.58416	4.80446	0.0363372	0.181686	98.0004	96.1405	0.0276429	1.05711	0.305271	0.417157
Zfp871|ENSMUSG00000024298	0.119029	6.01704	5.86025	0.0217847	0.521742	-0.163232	6.01694	12.9303	0.0011513	0.015582	64.3064	62.8252	0.0336189	1.31225	0.207607	0.307425
